# Supplementary material for: Critical Evaluation of Particle Size Distribution Models Using Soil Data Obtained with a Laser Diffraction Method
Source: PLoS One. 2015 Apr 30;10(4):e0125048. doi: 10.1371/journal.pone.0125048 (PMC4416045; doi:10.1371/journal.pone.0125048)
Supplement: S1 Dataset — (XLS) [file pone.0125048.s001.xls]

## Sheet: AIC
Data For LDM
JAKY1	LOGL2	LOGI2	LOGN2	VANH2	VANZ2	FRED3	LOGI3	MLOG3	ONLG3	ORLG3	SHCA3	VANZ3	ANDE4	FRED4	GOMP4	LOGI4	VANG4
8.942	76.248	-91.25	-263.216	-388.036	-164.098	-310.55	-102.651	-358.92	-276.347	-292.249	-296.937	-208.622	-302.503	-453.755	-176.408	-284.071	-229.506
28.253	90.438	-111.461	-245.033	-388.945	-161.407	-312.745	-119.315	-364.395	-259.542	-282.154	-288.006	-212.249	-290.642	-489.104	-207.615	-263.534	-46.328
-64.057	24.63	-35.291	-331.677	-275.406	-185.785	-319.657	-63.248	-301.107	-339.882	-337.454	-339.318	-223.985	-376.446	-384.751	-102.878	-354.49	-275.774
31.008	90.097	-149.66	-181.194	-283.407	-132.97	-304.591	-156.719	-321.974	-202.185	-229.333	-235.451	-194.308	-275.744	-445.374	-269.044	-196.802	-198.629
20.744	83.647	-119.234	-207.408	-319.066	-141.474	-290.569	-129.92	-313.357	-219.19	-242.197	-247.165	-193.65	-273.001	-404.038	-221.454	-221.356	-201.34
45.282	99.231	-179.938	-171.398	-254.509	-140.174	-318.804	-190.534	-312.062	-189.183	-226.37	-232.706	-209.498	-292.075	-408.879	-293.283	-183.046	-206.148
21.107	80.522	-121.923	-208.055	-288.413	-171.233	-314.749	-146.446	-288.645	-216.759	-250.281	-254.883	-245.51	-371.427	-336.087	-217.127	-227.353	-245.05
30.265	85.471	-152.574	-240.421	-335.308	-209.223	-416.146	-158.545	-402.14	-294.843	-323.606	-331.764	-281.268	-343.345	-444.232	-274.502	-265.435	-295.642
48.198	96.557	-263.895	-211.816	-267.222	-197.998	-461.144	-260.707	-425.501	-263.37	-294.511	-301.327	-195.998	-338.473	-519.009	-303.052	-224.783	-280.076
59.128	102.784	-344.637	-243.203	-281.714	-233.396	-479.341	-339.883	-449.282	-302.923	-340.576	-348.07	-231.396	-330.38	-491.83	-301.585	-250.808	-321.086
-11.078	63.289	-73.145	-264.133	-384.795	-150.72	-283.908	-77.199	-353.268	-296.736	-290.089	-294.315	-186.178	-275.043	-409.57	-143.741	-288.901	-218.687
-75.966	21.841	-50.514	-160.641	-245.846	-79.144	-190.035	-48.096	-229.84	-198.238	-179.152	-182.133	-110.424	-202.332	-289.293	-91.735	-194.415	-149.147
-116.352	-3.482	-86.511	-133.485	-241.963	-73.272	-235.173	-88.802	-269.884	-190.678	-174.567	-179.201	-125.404	-244.742	-366.05	-163.277	-204.451	-158.775
-100.891	4.743	-45.574	-140.826	-222.58	-66.238	-175.97	-42.488	-210.101	-179.816	-159.127	-161.82	-97.043	-192.748	-260.535	-85.327	-184.259	-139.205
-19.521	57.808	-18.107	-426.742	-215.234	-246.045	-338.984	-37.19	-243.411	-424.742	-424.742	-424.742	-260.223	-118.751	-407.187	-65.057	-358.338	-130.528
-49.464	34.613	3.76	-339.489	-171.612	-233.93	-300.18	-20.054	-204.959	-337.489	-337.489	-337.489	-239.645	-153.778	-331.069	-41.43	-293.524	-366.599
5.915	75.79	-21.703	-393.162	-204.301	-282.421	-362.651	-39.378	-227.266	-391.162	-391.162	-391.162	-291.636	-111.235	-411.505	-67.112	-303.422	-185.648
-93.033	15.237	-17.318	-214.806	-224.165	-107.014	-185.731	-18.049	-218.504	-237.381	-215.7	-216.855	-122.532	-221.787	-260.872	-45.064	-234.892	-184.068
-90.007	11.121	-60.498	-193.762	-312.989	-102.592	-237.211	-67.089	-284.938	-234.544	-218.533	-222.12	-139.656	-256.74	-351.465	-122.897	-233.19	-181.311
10.957	76.473	-120.129	-198.251	-326.438	-133.316	-298.904	-126.918	-341.418	-227.462	-241.762	-247.629	-188.552	-283.025	-480.18	-219.814	-221.6	-201.851
-9.358	58.088	-170.301	-117.78	-187.638	-90.289	-282.709	-177.335	-269.921	-155.702	-177.678	-183.702	-163.762	-252.305	-413.926	-265.58	-133.214	-164.309
46.802	96.099	-289.585	-156.711	-198.729	-146.57	-394.921	-283.184	-355.166	-206.841	-239.839	-246.69	-144.57	-295.624	-501.243	-314.984	-164.613	-229.316
60.561	104.429	-341.059	-230.951	-267.083	-222.881	-458.668	-335.262	-425.649	-290.921	-333.655	-342.128	-220.881	-332.284	-470.92	-291.364	-237.723	-317.023
56.362	101.695	-339.464	-214.138	-254.208	-204.384	-475.131	-330.601	-438.927	-271.495	-308.609	-316.108	-202.384	-331.288	-513.967	-311.94	-221.976	-292.814
50.225	101.478	-138.858	-225.818	-290.049	-221.272	-318.515	-171.848	-282.879	-227.289	-262.302	-265.907	-292.061	-429.871	-323.096	-243.265	-258.866	-13.95
17.717	82.865	-83.593	-319.662	-395.651	-198.667	-352.087	-97.629	-379.831	-327.327	-349.107	-354.253	-246.406	-350.954	-503.581	-164.505	-349.588	-64.736
13.199	76.872	-132.708	-200.758	-335.125	-142.867	-331.119	-135.713	-389.686	-242.071	-255.659	-262.308	-202.375	-296.666	-586.652	-259.451	-227.047	-216.358
-19.791	49.584	-117.965	-194.194	-296.989	-151.616	-324.027	-144.205	-305.705	-217.651	-243.738	-248.94	-221.721	-358.198	-365.792	-238.296	-217.284	-225.954
-3.19	65.512	-117.729	-196.68	-330.222	-132.999	-308.755	-126.867	-347.559	-229.374	-244.248	-250.358	-191.504	-297.593	-490.213	-223.9	-222.506	-206.577
-2.239	65.33	-111.72	-210.677	-334.958	-147.635	-321.784	-128.137	-333.025	-233.49	-255.986	-261.647	-208.903	-326.805	-413.346	-212.394	-235.352	-222.318
-224.082	-56.506	-13.977	-176.227	-230.92	-79.061	-174.588	-20.419	-208.515	-210.045	-182.989	-184.689	-99.824	-240.106	-254.918	-47.708	-233.42	-185.734
13.078	68.837	-295.655	-147.763	-183.194	-135.754	-386.3	-289.658	-342.19	-199.54	-212.706	-216.681	-133.754	-271.787	-511.707	-382.038	-221.176	-201.85
-24.781	42.575	-255.482	-121.227	-159.661	-111.169	-352.37	-255.699	-295.072	-179.231	-198.551	-203.575	-109.169	-298.145	-440.95	-286.27	-131.993	-193.498
-33.677	38.25	-215.423	-124.427	-176.331	-107.681	-336.919	-220.183	-296.139	-175.463	-190.739	-195.406	-179.653	-290.342	-453.328	-252.305	-139.414	-182.978
-5.113	53.055	-312.989	-194.636	-234.83	-184.625	-460.166	-317.272	-404.612	-250.062	-269.835	-274.173	-257.521	-357.539	-520.643	-349.885	-204.324	-259.511
-3.798	55.345	-280.555	-183.132	-229.366	-173.078	-440.002	-289.879	-380.133	-232.354	-256.105	-260.747	-247.207	-363.599	-514.082	-348.165	-193.557	-246.983
-32.712	40.857	-193.066	-119.057	-178.042	-96.011	-312.525	-194.974	-292.704	-169.336	-181.408	-186.234	-163.883	-259.974	-469.665	-293.838	-135.857	-169.311
-96.987	12.163	-33.389	-246.65	-303.734	-120.979	-237.831	-40.88	-291.194	-293.414	-260.709	-263.719	-150.258	-281.447	-340.94	-76.845	-294.298	-212.905
-93.507	9.259	-76.324	-187.427	-339.302	-108.364	-277.207	-88.509	-326.422	-240.094	-229.331	-234.82	-162.262	-304.494	-447.782	-154.202	-233.28	-196.911
-58.247	28.071	-90.325	-206.747	-357.309	-141.51	-340.294	-106.058	-368.333	-256.557	-264.57	-271.49	-208.764	-360.407	-464.683	-189.578	-246.685	-234.036
-198.164	-135.27	27.704	-227.641	-156.752	-179.56	-234.829	-46.137	-188.214	-231.114	-229.754	-229.866	-205.767	-222.125	-234.043	-74.664	-231.756	-255.182
28	81.128	-239.104	-176.301	-217.788	-149.911	-328.563	-230.962	-356.604	-218.74	-224.85	-227.536	-147.911	-232.278	-347.769	-512.672	-182.815	-199.123
46.149	93.893	-289.337	-217.444	-263.746	-194.172	-422.107	-281.499	-460.93	-267.658	-282.476	-286.692	-192.172	-277.364	-445.35	-417.186	-225.042	-253.253
44.422	95.398	-248.155	-176.898	-236.131	-158.175	-403.385	-241.913	-399.54	-226.86	-256.322	-263.47	-235.288	-299.631	-563.488	-344.143	-189.305	-238.086
-71.325	20.01	-83.756	-216.456	-391.532	-140.733	-335.881	-101.224	-380.83	-268.838	-270.25	-276.84	-202.774	-370.822	-496.92	-179.784	-262.082	-233.888
-65.83	25.337	0.143	-348.889	-188.421	-199.222	-273.651	-16.404	-218.644	-346.889	-346.889	-346.889	-206.318	-159.47	-322.498	-38.969	-298.859	-320.657
-87.975	8.732	-130.117	-160.993	-257.198	-116.886	-315.012	-133.822	-356.25	-226.792	-216.965	-221.411	-170.821	-301.773	-405.524	-296.724	-198.391	-200.258
-49.86	26.884	-203.587	-158.317	-221.445	-133.281	-372.961	-206.604	-362.427	-211.986	-213.963	-217.442	-189.167	-317.619	-489.096	-331.94	-180.364	-203.07
-55.114	22.941	-124.652	-166.824	-258	-134.674	-294.873	-153.481	-287.158	-190.871	-215.341	-219.681	-195.911	-279.177	-330.963	-297.258	-184.28	-195.569
11.953	71.978	-202.522	-164.981	-238.375	-140.28	-376.351	-203.634	-375.602	-212.475	-235.896	-242.241	-213.51	-307.032	-600.734	-351.96	-181.39	-217.441
-118.751	-8.6	-22.047	-324.057	-284.591	-168.259	-305.587	-49.956	-313.519	-356.342	-336.143	-338.658	-203.447	-394.298	-376.613	-84.124	-371.16	-278.389
-46.35	32.603	-63.241	-257.528	-314.001	-176.295	-330.562	-95.795	-315.896	-269.386	-285.125	-288.476	-235.866	-394.105	-361.304	-149.464	-289.967	-260.785
2.143	64.217	-100.406	-228.612	-299.069	-192.905	-311.802	-135.83	-288.363	-232.593	-256.294	-259.366	-253.053	-376.654	-324.695	-216.496	-258.654	-252.186
55.876	105.275	-224.704	-192.518	-269.546	-167.001	-398.97	-225.145	-404.623	-227.786	-261.054	-267.796	-165.001	-314.318	-622.795	-343.066	-207.235	-239.32
62.198	108.852	-258.507	-204.435	-269.899	-186.603	-444.067	-258.948	-422.706	-242.809	-283.485	-290.89	-184.603	-337.676	-616.931	-329.066	-217.331	-265.579
35.458	89.087	-178.908	-214.38	-315.632	-185.495	-410.896	-192.96	-391.622	-241.967	-282.329	-289.174	-259.746	-370.718	-513.882	-325.542	-233.37	-259.411
50.965	102.474	-156.057	18.09	-315.999	-206.04	-351.232	-180.449	-318.611	-233.053	-274.946	-280.076	-279.59	-396.938	-371.886	-275.083	-248.772	-12.769
20.646	78.553	-143.863	-214.041	-322.664	-177.598	-355.078	-166.002	-340.327	-230.488	-266.47	-272.023	-245.836	-356.654	-406.844	-292.838	-234.65	-244.124
46.277	97.627	-209.741	-183.449	-262.05	-159.598	-376.058	-218.276	-364.319	-210.514	-249.613	-256.21	-157.598	-320.142	-499.817	-328.966	-196.26	-229.675
69.429	111.701	-344.756	-229.715	-268.867	-224.866	-478.582	-344.156	-406.361	-278.17	-328.627	-336.78	-222.866	-377.61	-496.911	-283.017	-239.03	-322.441
-48.379	38.377	-36.391	-365.427	-291.67	-182.053	-305.989	-52.95	-310.466	-383.915	-368.275	-370.036	-209.812	-347.469	-409.69	-92.984	-374.454	-271.407
-19.112	56.593	-76.667	-253.782	-366.16	-148.794	-290.767	-89.264	-340.012	-273.85	-279.708	-283.977	-190.547	-297.473	-421.515	-152.527	-278.867	-219.464
-35.015	46.206	-43.712	-367.704	-300.651	-193.576	-326.742	-62.168	-318.125	-380.55	-373.738	-375.893	-226.51	-362.01	-430.092	-107.196	-383.773	-279.827
-14.832	58.664	-17.979	-357.386	-198.679	-267.653	-348.338	-42.401	-223.123	-355.386	-355.386	-355.386	-277.488	-106.561	-370.167	-73.942	-335.163	-127.389
-89.278	9.618	-47.85	-290.121	-396.765	-171.982	-354.167	-70.89	-407.339	-355.777	-342.545	-350.23	-227.828	-438.394	-458.236	-122.747	-366.61	-285.446
-32.254	47.427	-3.369	-358.577	-182.477	-242.951	-313.411	-21.583	-210.891	-356.577	-356.577	-356.577	-246.968	-142.004	-351.588	-45.601	-252.104	-365.512
-47.124	39.788	-34.799	-334.41	-267.357	-172.203	-278.276	-50.673	-283.835	-342.312	-332.961	-333.847	-194.743	-104.365	-377.326	-87.3	-330.627	-251.103
2.145	68.481	-89.502	-248.517	-324.071	-180.274	-320.735	-114.755	-313.573	-254.16	-275.661	-279.393	-239.545	-357.159	-357.343	-181.283	-274.02	-249.29
34.241	89.754	-126.781	-220.167	-293.182	-198.042	-313.48	-156.985	-286.415	-223.806	-255.384	-259.228	-266.262	-387.191	-324.813	-236.806	-246.977	-30.858
25.048	85.355	-107.279	-239.733	-322.806	-186.058	-315.107	-131.565	-307.977	-241.681	-267.005	-270.768	-244.396	107.189	-349.838	-210.725	-262.102	-46.937
-36.662	43.841	-105.481	-137.562	-228.918	-82.526	-236.078	-101.103	-271.624	-183.863	-176.739	-181.135	-130.65	-215.149	-354.043	-194.204	-166.13	-151.169
-46.727	33.123	-153.86	-147.587	-233.128	-111.892	-320.937	-160.929	-328.1	-197.686	-207.188	-212.399	-177.165	-288.981	-467.123	-307.136	-171.121	-188.746
27.764	82.571	-243.544	-163.921	-217.643	-142.95	-373.704	-235.739	-382.053	-216.035	-233.946	-239.414	-140.95	-272.563	-485.256	-396.437	-175.636	-214.25
19.615	80.561	-151.699	-189.124	-300.265	-143.308	-345.784	-152.798	-391.418	-234.787	-249.9	-256.671	-207.48	-299.005	-559.44	-295.039	-213.427	-218.563
-21.476	46.595	-65.267	-253.597	-266.217	-217.468	-322.074	-106.804	-266.682	-255.567	-273.029	-275.091	-285.894	-426.289	-326.203	-163.429	-291.245	-292.606
-4.994	64.145	-88.249	-256.341	-370.865	-172.82	-342.848	-108.312	-356.026	-272.404	-294.941	-300.022	-231.021	-367.213	-419.263	-175.414	-287.886	-252.157
-102.706	3.015	-83.909	-207.817	-374.956	-136.967	-325.57	-93.231	-404.596	-282.205	-264.624	-270.449	-189.507	-342.691	-413.847	-193.393	-304.822	-235.019
-27.027	34.239	-240.16	-297.75	-354.684	-266.366	-471.975	-251.415	-474.958	-374.699	-378.767	-383.511	-324.041	-347.447	-473.353	-277.737	-317.903	-349.138
-46.836	19.115	-259.797	-269.644	-325.255	-237.513	-431.779	-263.784	-528.036	-322.558	-313.123	-314.322	-235.513	-351.083	-438.802	-344.735	-292.949	-295.621
-22.618	35.866	-290.5	-285.926	-339.515	-266.31	-534.196	-304.85	-497.801	-355.986	-362.466	-366.401	-328.606	-386.809	-539.956	-285.61	-306.021	-346.859
19.075	75.663	-161.429	-195.79	-270.72	-178.661	-345.428	-187.249	-300.922	-216.467	-256.363	-261.612	-176.661	-418.849	-362.037	-251.233	-214.172	-257.71
70.594	113.009	-305.474	-228.462	-270.231	-225.392	-441.055	-310.606	-372.716	-267.617	-321.092	-328.801	-223.392	-391.427	-452.349	-263.352	-238.525	-321.235
55.239	103.757	-255.162	-166.069	-221.111	-152.357	-385.717	-255.341	-347.087	-203.565	-243.452	-250.584	-150.357	-324.013	-478.849	-293.373	-177.144	-233.717
63.499	109.016	-264.614	-212.749	-269.418	-202.304	-445.142	-267.904	-381.779	-250.298	-298.813	-306.573	-200.304	-378.317	-487.313	-273.267	-225.81	-291.667
-6.44	63.929	-66.113	-318.352	-326.305	-202.707	-345.234	-87.91	-328.747	-322.97	-332.849	-335.577	-246.45	-369.807	-408.101	-147.122	-348.881	-90.053
-42.26	41.71	-62.659	-268.752	-377.929	-150.898	-301.457	-77.93	-362.73	-305.561	-298.721	-303.893	-196.468	-332.357	-453.923	-130.405	-309.942	-234.33
-123.783	-7.5	-63.525	-157.145	-267.511	-77.027	-214.714	-74.191	-250.716	-200.494	-185.265	-189.596	-122.8	-239.832	-350.056	-119.861	-199.178	-160.53
-131.082	-15.782	-23.041	-302.419	-266.385	-154.555	-284.69	-50.573	-295.806	-325.593	-310.594	-312.924	-189.811	-357.972	-365.362	-84.739	-336.003	-259.174
-1.608	68.312	-75.952	-291.251	-355.487	-181.138	-324.582	-94.279	-344.783	-297.069	-311.82	-315.493	-226.204	-336.021	-418.67	-156.403	-313.806	-82.114
-16.064	56.552	-53.288	-316.6	-276.005	-212.444	-335.012	-80.991	-288.872	-315.57	-322.607	-323.985	-256.578	-381.739	-366.413	-129.593	-342.259	-285.906
-21.268	54.756	-60.37	-333.007	-377.13	-185.964	-337.368	-75.803	-375.575	-361.026	-358.721	-363.151	-224.346	-358.04	-470.354	-132.236	-372.432	-266.765
14.038	77.836	-118.112	-229.625	-395.913	-161.854	-349.052	-126.415	-408.944	-265.109	-283.934	-291.04	-222.524	-331.292	-585.324	-227.556	-260.33	-238.303
22.302	83.074	-132.935	-224.551	-379.363	-165.412	-363.703	-139.183	-427.65	-262.321	-284.938	-292.412	-228.522	-327.092	-642.439	-263.141	-252.448	-241.448
51.37	97.033	-375.043	-202.759	-237.759	-191.277	-465.483	-363.746	-446.273	-258.118	-284.486	-289.914	-189.277	-305.052	-529.863	-372.469	-208.211	-265.849
21.351	79.662	-181.384	-177.29	-252.292	-141.486	-335.117	-175.271	-383.611	-226.997	-237.087	-242.272	-196.713	-257.961	-414.569	-460.199	-193.979	-207.136
37.101	91.905	-183.018	-190.89	-288.073	-155.379	-367.456	-186.5	-398.957	-225.095	-256.221	-263.241	-223.219	-301.488	-609.257	-368.737	-207.293	-225.713
69.193	111.391	-374.145	-215.418	-249.699	-210.871	-473.468	-365.007	-406.808	-266.306	-314.302	-322.3	-208.871	-362.899	-498.992	-297.454	-222.521	-306.953
70.515	112.317	-396.171	-207.415	-240.255	-202.293	-488.535	-385.817	-419.904	-257.982	-301.058	-308.263	-200.293	-346.473	-541.133	-319.142	-213.276	-291.841
72.465	112.953	-408.533	-219.96	-247.563	-217.747	-467.796	-399.336	-408.926	-273.248	-320.505	-328.171	-215.747	-358.036	-482.094	-305.069	-224.85	-314.369
70.501	111.469	-416.755	-218.278	-248.606	-214.845	-492.842	-406.411	-424.089	-270.333	-312.211	-319.048	-212.845	-352.23	-520.017	-315.549	-223.734	-304.519
-17.215	57.694	-89.998	-211.341	-346.183	-126.353	-272.873	-95.982	-325.466	-244.203	-242.23	-246.659	-169.016	-269.065	-428.262	-170.582	-239.251	-193.499
20.175	82.559	-146.292	-160.008	-255.928	-110.844	-281.295	-144.313	-317.3	-196.349	-207.153	-212.847	-167.275	-244.304	-488.955	-267.721	-179.489	-176.842
11.333	74.178	-140.861	-187.543	-303.1	-137.86	-325.326	-148.154	-355.414	-218.78	-238.047	-243.832	-197.446	-296.093	-508.709	-276.206	-208.397	-205.344
38.339	92.963	-192.253	-177.937	-263.365	-145.504	-359.357	-191.742	-381.758	-218.21	-241.626	-248.163	-212.692	-296.61	-595.656	-342.086	-195.912	-218.017
-20.728	57.123	-59.562	-305.94	-352.597	-164.646	-292.737	-69.686	-346.041	-327.82	-322.014	-325.541	-197.343	-302.215	-435.22	-123.138	-326.71	-237.25
0.578	73.618	-40.512	-474.048	-271.488	-221.657	-328.791	-51.959	-290.483	-472.048	-472.048	-472.048	-244.805	-92.177	-449.025	-87.309	-402.171	-137.964
-16.288	59.521	-25.018	-452.602	-226.98	-255.441	-363.208	-44.284	-251.207	-450.602	-450.602	-450.602	-271.839	-114.15	-451.974	-76.702	-376.68	-124.441
-55.719	34.218	-30.388	-372.462	-277.097	-180.286	-296.422	-45.377	-297.32	-391.878	-372.51	-373.768	-204.563	-341.85	-395.106	-82.354	-372.097	-273.828
16.957	76.24	-143.105	-202.44	-306.975	-164.526	-345.197	-164.259	-329.875	-220.424	-254.528	-260.096	-233.078	-350.542	-404.359	-279.153	-221.625	-232.668
22.177	80.147	-178.91	-175.957	-265.125	-144.885	-359.392	-185.208	-364.134	-211.284	-238.311	-244.577	-214.365	-315.747	-534.437	-330.264	-193.438	-216.688
-43.452	42.497	-46.556	-314.054	-338.698	-160.642	-291.603	-57.596	-337.786	-352.597	-328.943	-332.267	-191.548	-319.278	-412.94	-102.821	-347.063	-243.779
-8.119	66.62	-61.37	-326.759	-350.169	-173.834	-300.666	-71.162	-347.073	-351.27	-341.993	-345.828	-207.633	-309.469	-476.381	-121.539	-345.96	-246.024
0.251	69.351	-74.97	-300.198	-350.869	-189.751	-335.225	-94.559	-343.628	-303.789	-319.522	-322.928	-235.514	-350.282	-416.583	-156.234	-324.353	-260.195
-17.013	56.52	-20.851	-348.186	-197.449	-281.708	-366.284	-49.262	-221.124	-346.186	-346.186	-346.186	-294.432	-111.885	-396.585	-81.93	-338.364	-165.252
-68.815	26.436	-16.693	-350.573	-228.433	-173.831	-267.463	-31.818	-251.585	-355.887	-348.573	-348.573	-189.133	-136.672	-353.908	-59.489	-325.596	-269.681
-29.602	50.562	-70.405	-227.49	-315.139	-126.797	-250.549	-81.798	-292.28	-244.479	-245.933	-249.504	-164.041	-259.477	-372.048	-133.999	-246.678	-192.946
-9.527	63.848	-77.612	-254.203	-343.484	-149.747	-281.931	-90.766	-322.339	-264.402	-274.557	-278.371	-190.385	-285.094	-402.816	-150.723	-270.825	-215.13
3.609	71.588	-98.92	-229.58	-348.503	-149.595	-302.021	-113.777	-327.825	-242.944	-263.055	-268.04	-202.321	-302.139	-408.09	-187.575	-249.843	-217.649
-21.163	52.9	-66.05	-262.694	-297.643	-174.732	-307.934	-92.912	-301.291	-269.53	-281.458	-284.495	-228.289	-347.981	-343.893	-142.725	-289.622	-250.026
0.268	69.43	-90.943	-248.45	-374.417	-159.367	-318.651	-106.132	-352.492	-266.004	-284.716	-290.104	-212.339	-325.652	-433.508	-172.26	-276.406	-233.035
-73.443	18.811	-59.745	-233.897	-337.338	-131.277	-273.007	-77.695	-312.17	-258.666	-256.515	-260.099	-171.639	-296.249	-379.499	-133.046	-263.508	-206.756
29.298	84.432	-245.73	-116.207	-161.329	-100.699	-324.178	-239.598	-296.683	-164.212	-187.863	-193.819	-175.436	-241.941	-537.073	-242.181	-125.377	-175.88
52.113	97.993	-367.702	-179.623	-211.422	-170.854	-445.79	-360.782	-400.942	-232.985	-261.882	-267.469	-248.24	-296.594	-540.69	-366.938	-183.889	-247.576
57.87	101.693	-404.181	-203.373	-233.808	-195.212	-474.364	-394.243	-435.091	-259.52	-291.283	-297.262	-193.212	-311.922	-525.556	-355.446	-207.347	-275.295
64.886	106.209	-430.241	-251.2	-284.64	-239.995	-500.173	-418.869	-496.647	-309.022	-339.971	-345.852	-237.995	-314.559	-513.112	-335.528	-256.126	-316.253
-29.35	51.611	-72.833	-202.254	-306.092	-109.97	-232.347	-75.225	-280.589	-232.322	-223.198	-226.789	-144.593	-233.767	-369.909	-132.066	-226.553	-174.289
-21.753	54.784	-99.338	-161.092	-263.823	-92.963	-233.45	-102.17	-268.482	-191.922	-191.476	-195.788	-138.198	-225.173	-387.221	-171.819	-184.27	-156.845
49.588	99.733	-241.641	-172.374	-234.553	-154.168	-391.705	-239.138	-375.76	-214.873	-247.336	-254.323	-152.168	-314.201	-550.705	-268.08	-185.673	-232.903
65.777	108.183	-398.525	-204.675	-234.406	-200.358	-468.827	-388.073	-412.07	-259.432	-300.725	-307.908	-198.358	-336.365	-497.926	-313.835	-209.266	-291.309
63.216	105.755	-407.149	-215.335	-245.021	-209.687	-469.295	-394.724	-428.199	-272.702	-311.606	-318.688	-299.699	-328.324	-490.509	-318.531	-219.559	-298.312
-45.406	38.579	-43.508	-321.85	-291.179	-177.294	-305.951	-64.317	-308.462	-334.499	-328.593	-330.599	-210.473	-342.081	-383.709	-107.875	-341.953	-258.7
1.404	68.335	-99.982	-238.315	-359.223	-164.183	-329.627	-118.421	-342.093	-253.19	-276.015	-280.9	-220.68	-340.252	-407.893	-195.391	-263.187	-236.382
-3.589	66.592	-76.656	-276.72	-342.665	-174.584	-311.962	-95.403	-329.878	-281.655	-294.908	-298.164	-217.981	-321.271	-390.857	-158.202	-295.872	-239.454
-52.405	37.541	-21.304	-367.099	-236.884	-180.176	-273.942	-33.984	-259.306	-371.914	-365.099	-365.099	-195.787	-126.282	-373.438	-63.468	-337.479	-271.028
-5.218	68.062	-50.296	-423.945	-309.268	-212.393	-341.78	-64.998	-321.74	-433.044	-427.309	-429.503	-244.184	-360.741	-498.832	-109.993	-423.738	-100.531
21.364	83.18	-116.029	-239.501	-377.16	-169.582	-340.095	-129.509	-362.637	-254.365	-281.353	-286.839	-225.766	-327.64	-449.86	-222.989	-262.003	-237.475
27.411	90.308	-86.786	-320.017	-367.984	-204.136	-342.572	-101.382	-354.08	-317.776	-339.21	-343.102	-248.985	98.778	-459.059	-167.709	-338.542	-65.832
-24.724	53.719	-38.296	-451.012	-288.045	-216.953	-351.86	-55.774	-308.828	-461.039	-451.209	-452.476	-247.38	-87.654	-469.439	-97.226	-438.029	-311.102
12.18	77.34	-102.336	-259.906	-445.223	-175.13	-353.851	-114.042	-415.842	-287.057	-309.825	-316.972	-233.593	-346.995	-557.231	-200.048	-293.483	-252.948
28.1	87.38	-127.649	-237.322	-377.745	-178.518	-359.064	-141.949	-373.84	-253.479	-287.372	-293.677	-242.326	-342.868	-461.595	-251.806	-259.775	-248.54
-40.583	38.294	-78.61	-237.969	-356.74	-152.702	-317.083	-100.892	-337.421	-260.463	-271.897	-276.246	-204.066	-344.105	-396.93	-168.102	-291.064	-229.422
38.483	93.035	-195.72	-167.675	-247.175	-137.203	-346.662	-194.91	-360.549	-205.992	-228.735	-234.911	-203.573	-287.23	-562.553	-332.941	-184.274	-207.725
23.75	83.397	-130.007	-229.423	-362.433	-176.873	-368.702	-145.62	-369.118	-249.354	-284.079	-290.651	-245.431	-365.376	-463.185	-252.795	-254.136	-252.759
33.858	90.478	-133.69	-239.172	-354.999	-194.576	-369.325	-153.006	-352.098	-250.667	-288.74	-294.411	-264.803	-383.936	-419.042	-256.268	-262.469	-266.184
34.278	89.278	-163.741	-216.22	-329.542	-180.297	-390.95	-178	-384.911	-240.23	-280.448	-287.394	-252.423	-357.03	-496.636	-320.382	-236.021	-252.894
53.808	102.073	-255.055	-201.438	-266.091	-181.361	-441.401	-252.156	-444.221	-247.093	-278.38	-285.229	-179.361	-323.043	-670.954	-345.087	-214.993	-257.901
11.477	72.914	-112.837	-250.511	-379.73	-196.637	-373.368	-135.803	-366.464	-264.211	-299.021	-304.616	-263.997	-384.345	-426.673	-243.984	-280.45	-267.771
12.353	75.876	-127.294	-194.086	-304.322	-137.466	-303.304	-139.05	-316.525	-213.37	-235.369	-240.464	-193.575	-288.344	-407.13	-236.993	-212.094	-202.094
43.887	96.813	-197.283	-189.796	-277.007	-157.064	-375.319	-198.07	-397.308	-227.857	-253.674	-260.121	-222.891	-306.709	-593.217	-342.875	-207.479	-228.16
56.663	105.528	-207.898	-211.619	-290.829	-190.707	-411.51	-214.286	-370.016	-241.719	-284.53	-291.567	-188.707	-372.272	-464.204	-273.863	-229.872	-272.519
-42.471	41.477	-49.357	-322.974	-327.164	-172.312	-311.525	-67.128	-339.507	-345.587	-338.639	-342.077	-209.552	-348.468	-430.982	-113.692	-353.993	-257.206
-23.618	53.985	-55.802	-333.541	-334.046	-183.554	-324.797	-73.488	-343.161	-348.166	-349.354	-352.816	-222.095	-353.711	-451.467	-123.345	-361.59	-263.726
-14.614	58.579	-71.442	-281.018	-346.974	-174.325	-322.109	-91.892	-338.972	-290.161	-303.239	-306.868	-221.413	-345.167	-399.178	-149.898	-319.045	-249.076
-113.266	-30.65	24.728	-230.771	-126.454	-208.116	-248.196	-27.73	-160.648	-228.771	-228.771	-228.771	-218.797	-260.275	-244.814	-48.916	-221.092	-281.393
-52.796	31.193	-37.402	-342.897	-273.101	-200.048	-337.038	-66.315	-296.509	-345.068	-347.754	-349.295	-240.382	-398.581	-392.561	-108.482	-365.971	-288.296
-8.215	65.253	-77.408	-267.543	-390.787	-156.338	-301.179	-88.097	-366.525	-297.255	-297.463	-302.631	-200.433	-308.49	-465.93	-148.344	-298.925	-229.505
25.498	83.672	-184.268	-159.274	-237.084	-127.764	-335.201	-179.426	-356.296	-205.232	-223.058	-229.366	-194.557	-268.847	-501.312	-351.177	-176.599	-200.871
39.522	92.001	-222.048	-188.511	-258.351	-165.67	-407.666	-218.134	-416.202	-237.921	-263.983	-270.864	-163.67	-309.87	-552.759	-312.07	-204.134	-243.915
32.04	86.87	-189.406	-186.517	-272.208	-160.838	-385.274	-198.652	-366.277	-219.818	-255.741	-262.683	-237.048	-347.463	-499.027	-307.482	-203.628	-237.422
13.452	74.138	-155.554	-179.774	-279.028	-142.628	-336.774	-169.243	-335.954	-206.99	-235.894	-241.929	-210.449	-316.436	-448.078	-298.884	-197.378	-211.948
-140.2	-17.859	-71.381	-193.551	-356.439	-115.578	-294.367	-87.23	-342.965	-253.204	-239.775	-245.139	-169.219	-329.824	-422.539	-159.273	-247.952	-212.805
-73.406	17.143	-93.354	-203.781	-348.611	-135.783	-316.941	-106.668	-356.935	-250.071	-251.152	-256.005	-188.487	-317.106	-413.604	-208.753	-239.895	-216.7
8.477	73.079	-85.156	-276.866	-334.488	-203.275	-353.09	-110.249	-327.097	-280.56	-303.785	-307.385	-264.18	-405.251	-387.523	-174.946	-309.402	-279.588
23.271	78.639	-114.983	-215.88	-270.243	-211.067	-297.057	-157.452	-262.977	-217.114	-245.298	-248.137	-275.692	-422.357	-299.494	-227.674	-249.968	-273.74
8.406	66.895	-108.57	-214.196	-267.845	-206.278	-299.102	-152.412	-264.663	-218.779	-250.338	-253.523	-281.789	-423.747	-300.313	-221.114	-246.648	-279.29
63.255	105.667	-414.06	-231.338	-266.957	-221.83	-514.883	-400.595	-482.4	-286.773	-319.284	-325.335	-219.83	-326.625	-558.056	-338.064	-237.468	-301.389
58.182	100.294	-444.791	-244.383	-276.751	-231.943	-496.14	-432.027	-505.097	-298.026	-319.225	-323.229	-229.943	-304.311	-502.277	-365.452	-248.592	-296.825
55.486	99.099	-378.586	-249.13	-288.276	-235.847	-508.557	-371.491	-503.625	-307.314	-334.179	-339.754	-233.847	-320.69	-527.709	-333.853	-256.631	-311.082
38.571	85.161	-341.238	-218.64	-251.188	-197.975	-377.905	-335.791	-423.366	-256.893	-261.397	-262.709	-195.975	-257.049	-390.057	-497.137	-221.773	-237.448
32.637	78.544	-399.148	-201.143	-228.534	-189.708	-418.826	-393.934	-402.322	-234.722	-240.354	-241.567	-225.454	-268.925	-436.405	-568.846	-204.309	-227.342
-66.54	6.18	-100.735	-202.419	-239.783	-205.557	-264.252	-163.13	-233.797	-207.344	-229.387	-231.025	-203.557	-358.082	-262.475	-239.896	-230.05	-254.41
26.264	82.555	-203.587	-172.938	-238.798	-142.165	-347.125	-196.63	-385.965	-222.1	-234.299	-239.333	-199.404	-259.143	-431.267	-459.387	-187.152	-207.498
58.108	101.438	-368.087	-244.04	-276.674	-231.084	-454.218	-359.328	-457.571	-305.534	-336.114	-342.525	-229.084	-304.623	-462.253	-324.187	-248.433	-309.019
52.598	96.205	-364.34	-262.053	-295.363	-249.703	-466.022	-358.622	-458.733	-326.996	-357.421	-363.928	-247.703	-321.325	-470.047	-305.073	-267.928	-331.233
50.75	93.301	-453.03	-248.234	-274.423	-232.699	-445.751	-449.636	-483.983	-301.261	-314.818	-317.808	-230.699	-286.077	-448.736	-391.751	-249.507	-288.462
47.632	90.925	-402.284	-258.746	-287.25	-238.42	-423.187	-396.93	-485.03	-308.347	-316.963	-319.2	-236.42	-280.803	-426.662	-387.451	-316.015	-286.718
10.453	75.216	-99.708	-275.209	-492.657	-191.022	-390.123	-109.462	-480.389	-322.557	-338.456	-347.033	-251.797	-361.45	-569.306	-199.882	-319.891	-276.884
4.777	71.76	-101.149	-256.317	-460.028	-169.839	-349.982	-110.744	-427.566	-292.128	-307.758	-314.862	-225.25	-335.612	-575.82	-201.768	-292.004	-248.012
18.1	79.512	-141.142	-207.943	-339.103	-155.888	-357.154	-146.72	-404.462	-250.743	-269.288	-276.435	-219.956	-322.47	-554.196	-269.605	-235.724	-233.265
49.38	100.511	-209.066	-199.903	-284.691	-167.849	-392.431	-209.032	-422.847	-239.308	-266.842	-273.414	-165.849	-308.147	-605.825	-356.015	-216.499	-238.578
-2.011	62.681	-131.822	-188.548	-291.705	-146.568	-323.949	-153.203	-312.837	-210.528	-237.921	-243.25	-213.17	-332.165	-386.424	-257.501	-208.178	-215.714
49.46	98.864	-256.772	-184.349	-241.762	-168.802	-421.958	-251.637	-400.68	-233.01	-266.582	-274.008	-166.802	-321.544	-545.702	-313.985	-196.87	-252.05
36.87	91.595	-201.244	-169.067	-245.941	-138.36	-353.938	-197.337	-378.273	-212.922	-233.504	-239.808	-204.338	-278.399	-588.354	-371.329	-185.028	-209.603
-3.621	57.318	-98.859	-210.797	-258.744	-201.694	-285.233	-144.034	-252.831	-214.261	-237.858	-240.314	-264.618	-398.028	-286.062	-210.903	-242.021	-262.684
-1.088	67.197	-75.609	-283.507	-328.388	-191.574	-329.753	-99.198	-322.096	-286.986	-301.073	-303.982	-239.856	-356.364	-378.103	-160.672	-310.872	-258.772
-62.738	29.665	-32.104	-345.915	-283.524	-170.831	-289.328	-47.995	-302.041	-367.049	-348.218	-349.899	-197.242	-335.725	-389.261	-85.327	-357.2	-262.718
6.584	73.561	-110.766	-209.737	-342.108	-137.798	-298.073	-120.143	-337.662	-234.082	-249.428	-254.998	-190.775	-287.552	-457.369	-205.79	-232.743	-205.857
-15.627	61.88	-52.152	-333.65	-326.266	-171.378	-288.272	-59.634	-329.837	-359.538	-342.496	-345.262	-198.725	-296.556	-423.79	-106.362	-343.76	-243.526
-88.235	15.475	-25.105	-318.876	-289.261	-155.053	-272.046	-39.704	-307.117	-362.176	-325.007	-327.209	-182.61	-330.794	-360.884	-73.013	-356.947	-260.306
-123.681	-7.052	-49.404	-218.809	-350.714	-114.766	-262.576	-65.543	-313.903	-267.574	-246.288	-250.553	-157.368	-311.201	-399.413	-111.706	-273.009	-207.583
-169.991	-33.401	-41.681	-122.385	-208.569	-50.851	-164.904	-41.46	-194.808	-164.921	-140.472	-143.029	-82.154	-199.047	-258.295	-81.103	-179.598	-137.597
-18.442	56.561	-69.212	-306.609	-416.802	-177.812	-331.328	-81.284	-395.452	-337.681	-340.71	-345.895	-219.487	-334.468	-461.21	-148.111	-353.698	-257.737
14.951	79.968	-97.257	-278.781	-486.334	-181.54	-354.287	-105.906	-441.353	-307.898	-328.736	-336.184	-235.572	-329.732	-573.228	-194.11	-311.997	-257.606
38.99	92.988	-190.715	-177.637	-261.985	-148.443	-355.117	-198.935	-349.225	-205.259	-240.386	-246.948	-219.271	-311.438	-480.55	-314.816	-192.113	-218.922
57.503	105.614	-226.361	-179.433	-241.988	-166.844	-360.127	-238.545	-320.879	-200.49	-248.217	-254.677	-164.844	-353.093	-399.244	-235.075	-189.957	-241.732
24.045	86.104	-88.654	-284.158	-332.359	-203.869	-325.52	-109.724	-318.044	-283.407	-298.373	-300.989	-248.326	100.088	-373.681	-181.37	-307.306	-56.082
7.455	76.894	-38.822	-452.613	-249.319	-259.163	-365.734	-55.005	-266.656	-450.613	-450.613	-450.613	-277.967	-90.141	-447.693	-93.073	-375.943	-141.809
16.345	81.62	-72.06	-337.144	-320.152	-217.827	-347.417	-91.278	-317.09	-336.025	-344.852	-346.99	-257.398	93.365	-422.357	-150.75	-361.225	-79.338
53.121	103.846	-204.498	-198.892	-281.904	-172.143	-403.233	-201.83	-419.116	-243.576	-277.182	-285.537	-170.143	-314.05	-548.617	-323.332	-216.458	-253.693
50.491	100.265	-213.672	-224.76	-305.739	-195.519	-439.75	-212.048	-487.203	-276.688	-306.781	-314.763	-193.519	-317.396	-552.508	-330.02	-321.405	-274.042
3.973	71.673	-110.862	-202.854	-335.443	-130.371	-287.492	-113.685	-342.037	-235.952	-240.879	-245.887	-177.181	-265.29	-458.772	-211.558	-226.939	-195.096
-3.14	66.773	-100.436	-224.828	-379.369	-141.882	-300.055	-106.096	-363.565	-258.219	-264.083	-269.427	-188.713	-283.868	-470.596	-196.319	-251.782	-210.691
-11.195	63.999	-63.287	-299.296	-369.846	-163.679	-289.357	-68.899	-354.716	-327.046	-318.794	-322.626	-196.116	-285.551	-415.714	-126.053	-318.222	-233.072
3.393	70.475	-117.561	-187.441	-299.448	-123.645	-279.395	-125.375	-308.02	-209.795	-224.664	-229.573	-174.659	-261.023	-413.607	-218.853	-205.628	-186.735
3.827	71.545	-89.061	-255.232	-353.541	-165.674	-307.451	-105.518	-331.597	-262.014	-279.244	-283.019	-211.32	-307.191	-393.912	-177.683	-272.61	-227.89
24.457	84.771	-122.542	-214.32	-313.175	-161.97	-308.7	-141.968	-306.058	-221.316	-250.244	-254.865	-222.11	-315.196	-361.226	-227.868	-230.081	-222.933
38.018	92.903	-158.978	-194.677	-283.076	-164.398	-327.245	-178.384	-307.24	-207.03	-245.027	-250.54	-235.176	-339.326	-369.636	-273.512	-209.323	-230.242
76.752	119.453	-297.543	-196.55	-242.266	-192.651	-402.035	-300.758	-348.868	-224.495	-278.871	-286.178	-283.81	-370.171	-429.562	-288.636	-203.777	-276.282
70.519	114.061	-279.217	-207.912	-253.892	-204.259	-402.637	-284.153	-342.974	-239.385	-293.463	-300.803	-202.259	-393.954	-416.857	-253.76	-217.805	-296.081
77.538	118.93	-319.174	-217.701	-257.823	-216.112	-425.806	-322.157	-362.957	-251.45	-308.254	-315.981	-214.112	-389.044	-439.657	-271.374	-225.516	-309.15
-143.734	-19.499	-43.104	-122.131	-199.538	-50.761	-158.087	-42.97	-185.308	-157.504	-136.991	-139.354	-79.883	-180.942	-254.056	-81.64	-166.073	-127.459
-60.316	32.699	-37.429	-159.698	-215.663	-77.498	-166.673	-32.93	-199.349	-185.753	-168.049	-169.988	-99.224	-177.49	-253.729	-67.974	-183.782	-137.399
-10.682	67.798	-44.427	-241.592	-254.664	-128.316	-210.321	-42.092	-248.811	-259.136	-243.18	-244.671	-145.432	-211.573	-310.347	-78.583	-244.333	-182.263
20.142	87.869	-63.18	-351.611	-334.85	-186.505	-297.586	-65.43	-335.399	-381.526	-362.077	-365.437	-215.556	-57.133	-429.428	-113.695	-352.09	-88.404
45.099	103.747	-120.487	-245.954	-394.933	-161.78	-308.48	-120.521	-379.676	-270.808	-285.617	-292.06	-210.609	-269.696	-535.632	-217.828	-265.297	-30.408
40.537	100.386	-118.397	-239.084	-383.038	-156.195	-302.691	-119.483	-369.517	-264.6	-277.854	-284.153	-205.53	-270.506	-524.123	-210.68	-259.345	-34.659
48.076	99.605	-222.963	-165.031	-232.543	-142.986	-365.981	-219.95	-363.393	-206.56	-236.833	-243.975	-140.986	-297.325	-538.542	-299.29	-179.18	-220.166
50.388	102.754	-200.963	-172.536	-252.786	-143.715	-352.677	-199.537	-363.745	-209.437	-240.091	-247.513	-216.634	-294.235	-533.733	-316.14	-188.73	-219.333
58.859	107.666	-222.048	-190.179	-260.936	-170.942	-394.921	-222.54	-363.744	-225.701	-267.666	-275.512	-168.942	-340.694	-468.296	-260.836	-205.906	-254.196
65.143	112.466	-239.426	-191.98	-259.613	-174.379	-406.087	-239.494	-377.1	-226.424	-272.165	-280.375	-172.379	-336.638	-504.274	-259.711	-205.761	-258.328
-80.397	15.105	-64.855	-101.859	-170.512	-45.055	-157.705	-59.748	-176.102	-132.627	-119.437	-121.652	-75.932	-154.729	-242.232	-112.114	-131.496	-104.023
-58.865	28.337	-50.555	-107.942	-168.654	-47.516	-142.747	-43.617	-164.822	-134.262	-120.532	-122.431	-72.41	-142.27	-220.612	-88.27	-133.118	-101.74
-22.662	59.516	-34.606	-262.447	-246.579	-137.93	-218.471	-35.116	-249.302	-278.47	-261.078	-261.998	-152.348	-228.191	-304.778	-68.296	-261.301	-197.989
1.029	74.416	-53.193	-325.411	-322.74	-171.859	-280.928	-55.882	-324.883	-360.223	-336.168	-339.106	-199.387	-273.734	-378.319	-101.09	-333.408	-240.898
39.443	100.418	-106.227	-251.555	-382.548	-155.676	-287.495	-104.579	-358.799	-277.949	-282.681	-288.184	-197.399	-253.214	-488.874	-186.609	-267.646	-38.476
41.915	102.22	-107.517	-254.132	-383.7	-157.849	-288.546	-105.729	-360.251	-279.037	-284.592	-290.029	-199.002	-252.738	-489.383	-189.351	-269.187	-36.179
54.692	110.027	-143.755	-222.971	-353.897	-157.003	-314.722	-142.091	-379.626	-247.203	-268.974	-275.736	-210.309	121.021	-555.97	-269.781	-240.031	-16.657
57.409	107.056	-222.035	-181.489	-255.121	-157.65	-381.44	-219.771	-382.472	-219.203	-252.832	-260.191	-155.65	-307.521	-551.924	-316.533	-196.427	-233.714
42.425	96.324	-187.362	-186.084	-275.616	-153.863	-369.016	-186.78	-389.199	-227.212	-253.148	-260.32	-224.367	-306.856	-550.439	-324.345	-205.237	-229.257
45.737	97.327	-184.233	-205.372	-284.584	-183.875	-385.908	-190.048	-348.978	-241.636	-279.844	-286.913	-181.875	-358.128	-417.239	-251.964	-225.995	-267.853
63.262	110.871	-232.507	-198.719	-268.775	-180.529	-414.308	-232.869	-382.127	-235.07	-280.451	-288.81	-178.529	-344.032	-500.872	-289.27	-213.924	-266.102
-67.552	28.484	-32.599	-170.409	-222.356	-83.834	-172.132	-29.22	-205.552	-197.187	-177.856	-179.675	-104.671	-187.057	-250.796	-63.148	-195.911	-146.941
-2.585	73.001	-45.5	-292.928	-273.454	-154.382	-241.536	-45.613	-276.959	-311.37	-293.135	-294.472	-172.169	-77.952	-345.751	-83.463	-287.479	-108.236
39.969	99.098	-122.615	-244.402	-409.746	-166.268	-329.76	-124.021	-406.773	-277.101	-293.264	-300.495	-220.371	-288.91	-551.545	-225.991	-269.83	-33.611
52.154	107.188	-146.998	-231.855	-376.998	-173.101	-355.308	-148.347	-420.606	-262.833	-292.119	-300.479	-237.467	-303.868	-589.772	-273.012	-256.21	-17.516
51.965	105.603	-181.587	-178.643	-270.746	-139.63	-327.764	-180.745	-356.417	-209.375	-237.156	-244.225	-205.128	-275.174	-533.613	-318.179	-195.067	-209.306
54.495	106.999	-190.046	-179.397	-267.599	-144.403	-339.868	-189.831	-358.444	-209.948	-240.81	-247.999	-212.491	-285.488	-516.796	-316.519	-195.593	-215.782
63.541	109.784	-246.425	-206.717	-267.552	-194.036	-425.51	-247.731	-371.84	-243.872	-290.524	-298.334	-192.036	-364.834	-467.531	-222.795	-221.15	-281.872
66.923	112.602	-251.132	-209.978	-271.911	-196.812	-432.429	-252.991	-379.554	-245.432	-294.488	-302.539	-194.812	-365.293	-482.911	-273.524	-223.944	-285.017
55.769	111.502	-142.909	-199.569	-302.479	-135.077	-272.698	-139.679	-323.116	-217.732	-235.214	-240.882	-182.611	117.585	-493.46	-252.611	-210.587	-15.316
-142.189	-18.103	-50.68	-142.991	-235.469	-66.998	-187.155	-53.347	-218.898	-181.796	-160.895	-163.368	-98.538	-211.711	-279.071	-100.214	-191.727	-145.805
-59.258	28.965	-80.841	-81.723	-147.709	-31.983	-158.082	-74.144	-170.711	-116.594	-106.797	-110.064	-73.186	-144.505	-273.104	-128.26	-108.629	-92.097
-11.141	67.286	-45.985	-259.033	-269.611	-136.546	-224.37	-45.14	-265.867	-279.274	-261.585	-263.265	-155.484	-226.456	-328.788	-83.13	-262.737	-194.286
32.893	94.909	-97.691	-287.921	-444.762	-179.768	-329.749	-100.193	-417.157	-322.697	-328.057	-334.712	-225.695	-293.937	-509.178	-178.85	-315.547	-46.831
46.412	102.983	-141.679	-225.113	-367.556	-163.844	-341.506	-142.334	-407.64	-258.343	-281.19	-288.92	-224.735	-293.341	-575.421	-262.556	-249.062	-23.253
42.942	98.353	-172.687	-179.909	-276.007	-140.009	-332.51	-171.982	-363.924	-215.588	-238.822	-245.729	-205.39	-283.016	-536.172	-309.594	-198.726	-210.985
60.275	106.693	-283.061	-187.38	-238.242	-175.623	-431.243	-277.462	-390.977	-232.247	-271.454	-278.955	-173.623	-331.139	-533.988	-210.091	-198.006	-259.595
60.315	107.866	-251.729	-181.924	-241.087	-167.308	-404.762	-249.081	-368.678	-221.424	-262.862	-270.63	-165.308	-332.491	-492.99	-238.498	-194.588	-251.165
58.84	107.363	-220.322	-201.386	-275.051	-181.793	-413.48	-221.638	-379.937	-238.56	-280.591	-288.562	-179.793	-348.842	-488.41	-263.444	-218.259	-265.819
60.168	112.845	-172.526	-196.276	-299.565	-150.338	-326.263	-172.114	-362.967	-220.08	-249.197	-256.154	-211.653	-274.198	-530.051	-310.311	-212.407	-5.931
-148.877	-21.779	-46.749	-135.111	-220.048	-60.254	-174.239	-49.333	-203.105	-171.237	-150.438	-152.724	-89.859	-199.619	-266.204	-91.479	-181.253	-138.363
-64.473	30.498	-24.81	-169.102	-203.019	-84.122	-160.339	-20.625	-189.001	-188.997	-171.748	-172.92	-99.174	-175.609	-229.58	-50.831	-188.265	-142.408
2.801	76.557	-44.383	-312.463	-267.326	-165.427	-249.287	-45.152	-274.51	-326.934	-310.534	-311.342	-163.427	-80.357	-349.715	-82.718	-297.466	-91.901
10.974	80.293	-80.979	-260.614	-374.4	-149.564	-279.407	-81.764	-350.911	-295.431	-287.331	-292.135	-187.205	-261.532	-431.084	-144.858	-282.657	-214.28
27.122	90.154	-111.156	-230.661	-381.493	-149.43	-305.273	-112.001	-373.491	-265.458	-272.76	-279.092	-199.882	-274.521	-506.386	-199.949	-255.543	-216.603
30.572	91.659	-118.231	-235.376	-395.768	-159.609	-327.964	-117.989	-409.111	-276.21	-286.572	-293.625	-212.604	-281.761	-505.935	-224.201	-262.332	-229.751
34.033	94.676	-130.656	-195.867	-315.166	-131.151	-287.384	-128.826	-342.459	-227.604	-238.932	-245.061	-183.679	-251.102	-512.391	-236.095	-215.469	-195.059
51.036	101.476	-219.812	-191.577	-267.567	-166.934	-402.675	-217.702	-411.454	-234.673	-265.274	-272.559	-164.934	-315.818	-593.699	-327.814	-207.795	-244.069
48.303	99.762	-178.424	-219.97	-310.747	-194.732	-414.297	-184.935	-379.167	-259.244	-300.296	-308.686	-278.711	-363.048	-463.023	-268.463	-242.941	-282.535
63.197	113.984	-194.848	-192.712	-286.198	-157.085	-354.352	-194.196	-381.506	-220.988	-256.662	-264.396	-226.241	-290.123	-557.527	-335.976	-208.632	0.906
-60.17	29.293	-55.285	-140.732	-215.101	-70.504	-176.14	-50.525	-207.12	-172.402	-156.096	-158.254	-97.413	-178.403	-252.335	-101.254	-169.748	-107.846
-56.775	32.164	-66.025	-120.148	-196.452	-56.248	-171.862	-60.293	-199.714	-154.439	-140.772	-143.774	-91.039	-168.866	-276.148	-111.82	-148.6	-117.686
-0.38	72.903	-54.47	-317.649	-321.235	-168.889	-278.427	-57.972	-319.375	-344.948	-325.547	-327.98	-193.637	-271.787	-381.027	-105.178	-324.193	-233.749
3.458	74.841	-76.725	-264.837	-383.439	-151.989	-288.501	-78.643	-361.853	-306.075	-296.193	-301.56	-192.485	-273.308	-428.673	-139.561	-292.982	-222.61
34.684	94.598	-123.141	-236.748	-396.495	-164.794	-337.022	-126.677	-404.101	-270.615	-287.849	-295.12	-222.482	-303.669	-544.35	-224.607	-264.405	-236.406
41.028	97.512	-157.347	-195.636	-306.661	-149.14	-337.336	-159.242	-371.825	-229.308	-252.937	-260.009	-213.557	-296.033	-513.27	-281.852	-217.199	-220.914
63.054	110.25	-245.789	-184.802	-246.137	-169.817	-399.462	-244.411	-361.217	-220.386	-263.619	-271.251	-167.817	-337.748	-472.212	-239.179	-197.915	-252.844
63.037	110.311	-235.774	-195.839	-261.033	-180.517	-405.499	-236.923	-362.489	-230.047	-276.746	-284.682	-178.517	-354.099	-461.432	-240.935	-210.328	-266.866
53.84	104.268	-187.145	-210.922	-295.567	-187.295	-394.738	-193.603	-357.816	-242.412	-286.493	-294.211	-270.577	-365.622	-437.999	-260.97	-231.604	-273.627
56.315	110.698	-158.439	-201.122	-311.887	-146.906	-310.503	-157.93	-356.852	-223.566	-249.114	-255.847	-204.339	123.823	-529.039	-287.293	-216.981	-11.995
-57.961	31.75	-47.839	-136.29	-201.305	-64.403	-160.252	-42.5	-189.298	-163.334	-147.497	-149.465	-88.19	-165.021	-245.829	-84.325	-162.135	-121.624
-48.16	40.509	-47.673	-164.735	-231.304	-82.175	-179.553	-43.33	-215.488	-193.391	-176.59	-178.941	-107.423	-184.877	-274.12	-83.986	-188.884	-141.866
20.116	86.955	-65.431	-365.144	-358.005	-197.623	-322.97	-69.775	-356.109	-402.339	-384.419	-388.925	-231.388	-300.722	-440.512	-122.513	-378.195	-69.137
20.401	82.797	-129.172	-192.617	-305	-131.996	-296.319	-125.552	-357.972	-233.79	-238.213	-243.552	-180.331	-248.808	-427.263	-257.582	-214.338	-195.422
24.865	88.124	-114.28	-217.763	-357.256	-141.576	-297.179	-113.007	-365.643	-255.08	-260.405	-266.44	-190.441	-260.795	-476.553	-210.434	-241.417	-207.274
48.975	104.693	-145.364	-220.636	-350.404	-163.454	-338.785	-148.392	-382.104	-247.294	-273.063	-280.189	-224.269	-300.168	-506.021	-258.767	-243.237	-20.481
38.256	95.746	-150.423	-198.838	-315.759	-148.374	-333.279	-151.444	-378.429	-234.565	-254.393	-261.335	-210.49	-290.701	-527.399	-273.219	-221.202	-219.067
49.977	100.801	-206.937	-186.032	-258.436	-166.02	-384.195	-206.969	-355.364	-225.8	-262.309	-269.959	-164.02	-334.717	-443.996	-263.184	-203.123	-248.448
52.852	104.109	-180.22	-212.5	-305.892	-183.568	-395.194	-184.364	-375.335	-247.326	-286.134	-294.033	-261.989	-346.449	-457.863	-274.659	-234.384	-265.765
37.691	91.852	-169.338	-203.262	-290.741	-177.565	-383.171	-172.892	-363.272	-247.163	-277.192	-284.739	-175.565	-336.671	-425.447	-267.433	-225.194	-259.637
-58.596	28.503	-85.941	-116.904	-194.242	-61.637	-192.136	-81.284	-213.698	-151.626	-141.598	-144.38	-98.765	-179.496	-282.439	-153.066	-144.38	-121.348
-48.696	38.257	-62.352	-135.05	-211.457	-65.408	-175.44	-56.962	-207.082	-167.006	-152.954	-155.773	-96.929	-173.788	-280.193	-105.681	-161.536	-125.101
-23.49	57.354	-60.281	-208.18	-289.607	-111.754	-222.8	-58.217	-270.786	-241.453	-225.128	-228.283	-141.875	-219.937	-329.909	-106.746	-231.321	-174.296
31.731	89.909	-153.379	-193.034	-303.049	-148.734	-348.063	-153.847	-385.997	-234.474	-253.814	-260.914	-214.93	-298.317	-520.796	-284.845	-216.077	-223.298
27.201	84.603	-175.22	-190.933	-283.943	-152.876	-366.076	-172.401	-418.459	-240.547	-256.824	-263.347	-215.696	-288.267	-508.74	-376.491	-211.254	-225.882
19.728	83.674	-107.685	-235.252	-389.443	-156.043	-319.932	-107.048	-402.18	-281.093	-285.26	-291.933	-206.258	-276.442	-449.148	-206.666	-263.967	-227.157
27	87.73	-139.421	-194.448	-315.014	-137.856	-314.585	-139.405	-368.91	-232.688	-245.338	-251.682	-194.709	-274.45	-529.17	-261.233	-217.432	-206.48
46.522	99.243	-183.87	-192.405	-279.294	-164.706	-376.11	-186.954	-358.783	-228.518	-263.309	-270.911	-241.814	-336.324	-451.116	-277.964	-212.47	-245.175
53.847	105.044	-188.174	-203.895	-296.198	-174.009	-389.889	-191.111	-379.75	-237.453	-273.973	-281.604	-248.817	-337.644	-485.84	-291.082	-224.133	-252.604
52.202	108.726	-138.821	-213.043	-330.747	-145.108	-290.044	-137.662	-345.786	-233.469	-252.283	-258.428	-195.478	117.001	-511.43	-247.417	-227.701	-19.748
-50.503	33.624	-71.286	-110.812	-178.891	-54.526	-167.258	-64.717	-188.803	-141.455	-129.542	-131.814	-85.176	-157.496	-244.974	-125.342	-136.271	-109.405
-41.707	42.888	-70.823	-140.917	-224.203	-71.664	-190.305	-65.826	-224.761	-175.72	-162.987	-166.256	-107.08	-184.823	-301.021	-120.914	-167.617	-133.094
-7.786	68.747	-62.596	-239.089	-308.88	-128.083	-235.626	-61.456	-289.775	-268.875	-253.368	-256.645	-157.214	-231.424	-366.041	-109.421	-255.93	-189.404
31.586	95.168	-96.626	-240.99	-349.154	-143.344	-264.171	-93.701	-326.186	-266.183	-265.481	-270.087	-180.036	-235.744	-441.819	-166.851	-265.988	-46.675
41.256	98.728	-139.558	-223.705	-366.255	-164.019	-347.032	-141.518	-409.771	-259.626	-281.575	-289.308	-226.249	-302.659	-556.346	-255.867	-249.283	-237.149
42.171	99.152	-148.385	-209.955	-337.736	-153.515	-333.359	-148.165	-396.878	-245.248	-265.259	-272.378	-212.599	-282.712	-576.263	-283.042	-231.987	-222.739
38.201	94.303	-159.248	-204.312	-317.387	-162.013	-366.759	-162.381	-394.739	-243.114	-268.611	-276.138	-230.963	-321.354	-524.435	-289.747	-228.253	-238.606
55.008	105.066	-200.851	-201.476	-283.282	-177.382	-394.995	-204.198	-368.15	-234.628	-274.291	-281.727	-175.382	-348.066	-462.822	-277.169	-220.109	-258.356
60.831	111.207	-196.027	-198.04	-288.515	-167.814	-376.847	-198.12	-374.946	-227.034	-266.685	-274.523	-242.468	-322.718	-497.839	-301.558	-215.915	0.108
40.297	98.287	-134.709	-227.452	-375.182	-161.683	-336.855	-135.206	-408.943	-263.385	-280.477	-287.602	-159.683	-287.961	-553.592	-254.954	-252.09	-230.7
-42.443	38.946	-89.028	-82.282	-143.654	-36.14	-162.362	-81.938	-172.106	-114.422	-107.357	-110.363	-75.51	-141.002	-266.724	-143.775	-104.814	-91.45
-48.201	35.843	-83.051	-92.875	-159.578	-41.962	-165.859	-76.175	-181.523	-126.016	-116.735	-119.694	-80.014	-150.314	-268.92	-136.128	-117.649	-99.149
-28.75	54.189	-54.767	-210.57	-284.362	-111.383	-217.765	-52.942	-264.79	-243.066	-225.137	-228.042	-139.41	-219.324	-322.3	-98.585	-233.513	-174.395
33.574	95.376	-112.424	-227.89	-358.876	-144.418	-284.551	-111.467	-348.965	-256.937	-262.733	-268.24	-188.869	-252.076	-479.669	-200.311	-246.728	-41.019
47.412	105.223	-118.829	-265.579	-437.222	-179.224	-335.807	-120.987	-418.268	-292.484	-311.045	-318.355	-232.718	-296.836	-553.412	-213.129	-322.058	-20.597
43.04	99.486	-145.828	-222.753	-360.829	-167.165	-357.773	-147.508	-419.197	-259.773	-283.247	-291.036	-230.47	-305.43	-573.767	-275.848	-248.008	-240.882
49.413	101.466	-199.216	-186.758	-271.808	-157.447	-375.642	-198.726	-388.407	-225.571	-256.185	-263.611	-230.195	-310.855	-555.852	-321.103	-204.554	-233.907
64.789	113.071	-221.812	-193.344	-269.337	-171.498	-391.658	-223.359	-371.774	-223.491	-267.406	-275.279	-251.058	-330.964	-493.035	-279.003	-208.383	-251.497
68.051	115.466	-214.67	-210.957	-289.918	-190.208	-407.233	-218.016	-372.078	-239.279	-287.86	-295.903	-273.297	-356.087	-468.464	-262.45	-228.201	-274.433
53.154	110.039	-127.198	-233.34	-353.684	-153.071	-284.996	-125.067	-346.645	-250.905	-265.524	-271.022	-196.647	113.741	-501.889	-225.5	-244.993	-28.497
-60.932	29.92	-44.666	-141.42	-205.508	-67.699	-162.018	-39.612	-191.998	-168.857	-152.261	-154.189	-90.88	-168.545	-243.031	-80.44	-167.843	-126.285
2.561	75.697	-50.354	-351.128	-303.204	-179.219	-283.369	-54.502	-309.28	-376.675	-353.869	-355.81	-202.563	-73.044	-398.524	-96.315	-344.116	-103.913
34.154	93.344	-127.435	-235.346	-393.422	-169.012	-353.884	-129.464	-427.094	-276.551	-293.028	-300.617	-228.004	-302.973	-523.185	-238.323	-263.888	-242.569
45.2	103.488	-119.475	-258.362	-426.447	-174.935	-333.163	-121.873	-409.566	-285.709	-304.446	-311.772	-229.532	-296.786	-553.954	-214.604	-283.72	-23.388
41.632	97.632	-145.712	-235.937	-385.97	-179.133	-379.095	-147.978	-457.194	-276.843	-300.856	-308.878	-241.635	-315.954	-603.171	-288.31	-263.38	-254.072
37.187	94.834	-151.697	-198.676	-315.845	-147.651	-334.031	-151.334	-386.384	-236.932	-255.556	-262.551	-208.859	-283.967	-542.01	-281.405	-220.895	-218.399
39.471	93.079	-214.487	-151.622	-216.557	-129.53	-344.856	-211.527	-338.074	-193.03	-218.063	-224.434	-201.728	-283.025	-497.848	-296.746	-165.672	-203.216
39.725	93.34	-198.654	-176.423	-253.196	-151.502	-372.716	-198.297	-363.622	-218.439	-245.663	-252.556	-149.502	-315.341	-481.282	-295.562	-194.063	-228.421
47.41	101.308	-174.217	-191.647	-289.535	-155.417	-357.348	-175.038	-372.669	-227.242	-256.1	-263.624	-226.124	-309.255	-493.898	-295.282	-211.984	-230.692
35.198	98.436	-90.162	-252.568	-329.544	-147.007	-251.604	-86.615	-309.821	-269.446	-267.511	-271.116	-176.975	-36.104	-419.875	-151.233	-256.698	-62.473
-56.432	32.526	-48.79	-147.873	-216.097	-73.685	-172.021	-43.753	-203.37	-176.518	-160.078	-162.042	-97.74	-175.912	-248.084	-89.194	-174.464	-132.012
-37.564	49.213	-43.631	-217.403	-265.445	-112.143	-207.583	-42.267	-249.632	-245.301	-225.446	-227.613	-134.652	-216.348	-303.954	-80.62	-236.465	-175.133
4.495	77.324	-63.131	-239.218	-291.739	-130.347	-227.376	-60.018	-276.155	-262.141	-248.798	-251.411	-154.694	-217.122	-345.88	-107.78	-247.819	-183.899
31.657	91.173	-134.302	-220.268	-364.393	-158.159	-341.998	-134.198	-418.549	-263.243	-278.476	-285.857	-216.406	-288.883	-539.813	-263.759	-246.417	-230.821
46.701	104.117	-132.794	-231.777	-380.169	-160.879	-323.756	-132.435	-394.955	-262.047	-281.025	-288.289	-216.42	-278.787	-561.284	-243.739	-253.843	-25.512
46.877	101.664	-173.901	-181.618	-278.342	-141.513	-331.767	-173.885	-360.15	-214.491	-240.919	-248.087	-207.998	-284.215	-523.219	-305.127	-199.988	-213.086
54.861	103.957	-224.153	-188.391	-254.52	-171.604	-395.604	-223.228	-359.539	-228.249	-267.624	-275.307	-169.604	-339.702	-451.308	-269.989	-203.899	-255.336
60.687	107.663	-246.068	-200.057	-260.891	-186.635	-419.323	-247.119	-369.182	-237.521	-283.04	-290.772	-184.635	-361.465	-468.729	-227.554	-214.147	-273.908
58.643	107.144	-205.085	-212.615	-288.413	-193.562	-408.1	-209.397	-365.015	-247.295	-291.868	-299.622	-191.562	-361.761	-446.335	-249.667	-231.423	-279.948
42.611	102.061	-121.372	-223.853	-346.194	-144.68	-281.372	-120.906	-339.857	-244.512	-256.978	-262.483	-189.934	-248.3	-496.53	-214.894	-238.721	-31.867
-33.345	47.626	-73.189	-171.12	-264.353	-95.83	-219.172	-69.988	-261.107	-207.735	-193.928	-196.94	-128.931	-210.459	-308.035	-135.378	-198.613	-157.102
-47.314	41.645	-47.727	-192.36	-262.288	-99.15	-202.141	-45.733	-243.361	-224.198	-204.923	-207.38	-125.073	-209.405	-295.157	-87.915	-218.629	-163.073
-16.668	61.818	-54.717	-259.788	-321.415	-140.49	-252.139	-55.244	-306.942	-295.221	-274.504	-277.484	-168.156	-249.227	-347.279	-103.282	-280.856	-206.581
27.241	88.441	-125.787	-219.3	-362.313	-152.702	-327.267	-124.59	-406.624	-263.617	-274.373	-281.427	-207.699	-276.927	-483.497	-242.735	-245.307	-223.899
34.028	95.774	-108.967	-244.14	-389.391	-154.564	-297.781	-109.504	-366	-272.69	-279.646	-285.464	-200.199	-267.202	-510.998	-194.363	-265.006	-42.369
46.529	99.772	-195.022	-175.472	-258.761	-145.15	-355.15	-193.801	-369.158	-214.334	-243.096	-250.487	-217.464	-297.064	-529.765	-316.406	-192.734	-221.036
53.585	105.361	-201.617	-176.218	-257.944	-143.283	-345.821	-198.245	-374.518	-211.791	-237.47	-244.084	-208.151	-275.539	-597.508	-353.657	-191.223	-211.603
60.636	107.855	-263.073	-165.744	-216.758	-154.628	-383.703	-260.416	-340.76	-204.351	-247.428	-255.051	-152.628	-324.285	-452.373	-281.165	-176.085	-239.426
58.25	106.657	-217.725	-198.927	-267.408	-182.749	-396.062	-221.06	-351.231	-232.796	-278.79	-286.52	-180.749	-362.811	-435.164	-241.024	-215.323	-270.317
65.476	117.142	-174.876	-202.364	-307.227	-154.659	-326.734	-173.473	-370.863	-223.967	-254.046	-260.963	-213.826	129.364	-549.609	-331.347	-262.708	-1.526
-43.934	40.317	-71.948	-114.509	-187.236	-53.241	-167.858	-66.12	-192.74	-145.385	-133.975	-136.833	-87.079	-160.199	-277.917	-118.703	-139.407	-110.313
-24.107	58.368	-48.238	-201.959	-248.401	-104.32	-192.569	-44.665	-231.835	-224.208	-208.544	-210.647	-125.545	-196.092	-301.496	-82.544	-215.44	-160.052
12.472	80.967	-84.525	-241.252	-354.936	-141.447	-268.976	-82.874	-334.33	-276.796	-269.101	-273.653	-178.2	-245.318	-395.741	-152.003	-261.884	-203.291
37.962	95.184	-154.45	-197.622	-311.054	-146.893	-333.217	-151.175	-397.669	-239.062	-256.446	-263.46	-206.351	-270.904	-538.305	-314.75	-218.401	-216.688
40.001	96.53	-155.389	-205.427	-324.296	-154.859	-346.627	-153.406	-411.47	-247.09	-266.082	-273.329	-215.703	-282.751	-550.742	-309.125	-227.479	-225.965
37.228	95.183	-153.972	-184.525	-291.541	-135.777	-315.724	-152.967	-358.252	-220.022	-238.34	-245.081	-197.109	-272.511	-519.395	-275.499	-204.843	-205.018
37.979	95.889	-153.223	-181.884	-286.179	-132.775	-307.761	-152.605	-347.351	-215.144	-232.83	-239.26	-192.366	-267.518	-501.613	-271.999	-201.32	-199.877
46.898	100.523	-171.055	-200.608	-300.399	-165.735	-371.989	-174.058	-373.044	-235.964	-267.886	-275.589	-239.056	-327.839	-471.603	-283.436	-222.475	-243.748
50.506	105.729	-152.3	-211.059	-332.928	-158.983	-337.516	-154.363	-378.784	-239.289	-266.71	-274.223	-223.107	-298.249	-511.866	-269.422	-232.746	-17.344
13.692	83.827	-63.372	-231.882	-270.791	-128.932	-214.48	-58.812	-257.148	-248.36	-237.611	-239.653	-149.078	-201.179	-322.335	-106.78	-233.879	-76.462
-63.273	27.985	-49.456	-126.401	-192.785	-57.38	-155.529	-44.283	-182.915	-154.363	-138.516	-140.576	-82.507	-160.53	-245.41	-86.141	-153.801	-115.506
-31.331	53.401	-47.899	-208.418	-261.248	-107.322	-202.634	-45.555	-244.224	-234.685	-216.988	-219.304	-130.693	-208.085	-308.703	-83.889	-226.46	-167.458
16.072	83.96	-75.525	-292.757	-382.074	-167.054	-295.524	-76.537	-367.445	-331.179	-320.022	-325.048	-203.636	-272.436	-423.037	-137.678	-314.206	-233.774
42.812	100.575	-133.348	-230.042	-379.601	-163.08	-336.274	-133.537	-407.72	-265.265	-283.375	-290.794	-220.663	-288.291	-548.895	-245.188	-254.642	-28.066
42.873	101.68	-122.696	-242.575	-399.587	-163.43	-320.578	-123.742	-392.532	-271.385	-287.908	-294.927	-216.778	-282.724	-550.833	-222.195	-265.682	-230.142
35.46	95.128	-134.76	-204.23	-331.533	-141.795	-308.252	-135.064	-364.243	-236.636	-251.768	-258.326	-197.895	-271.778	-541.292	-246.327	-225.981	-208.891
41.278	95.787	-173.378	-182.434	-269.704	-151.721	-351.828	-175.963	-341.58	-218.145	-247.461	-254.525	-224.555	-317.875	-424.033	-270.82	-202.375	-228.158
51.76	102.646	-187.716	-208.401	-295.014	-183.457	-398.899	-192.57	-367.84	-243.097	-283.359	-291.123	-263.963	-356.965	-454.557	-269.613	-229.288	-267.192
54.676	108.84	-160.201	-207.992	-324.897	-157.495	-334.916	-162.035	-374.892	-232.424	-262.507	-269.841	-220.601	-290.366	-528.721	-288.868	-227.058	-12.798
19.106	86.514	-86.144	-191.205	-266.044	-108.302	-209.848	-80.757	-254.257	-211.357	-207.331	-210.632	-138.078	-190.405	-350.3	-142.288	-200.512	-156.505
-57.589	29.904	-75.943	-97.162	-165.383	-43.643	-163.505	-69.636	-180.718	-129.619	-118.154	-120.78	-78.641	-152.806	-257.937	-126.985	-124.132	-100.982
-63.589	29.369	-39.579	-155.795	-217.108	-76.226	-168.889	-35.181	-201.107	-183.483	-165.572	-167.49	-98.684	-178.75	-247.891	-73.423	-182.277	-136.809
3.218	74.871	-62.063	-307.596	-359.099	-170.696	-291.991	-64.519	-351.466	-350.435	-329.834	-333.835	-203.094	-276.535	-381.08	-118.085	-328.267	-241.021
38.117	96.559	-135.351	-221.893	-364.751	-159.603	-338.137	-137.287	-400.703	-257.234	-276.071	-283.36	-219.303	-297.006	-553.563	-249.095	-247.233	-230.901
-4.606	67.559	-69.614	-291.831	-401.335	-172.579	-318.275	-75.849	-389.979	-342.77	-328.288	-333.568	-214.285	-303.688	-408.662	-136.813	-329.313	-251.463
13.272	79.455	-116.354	-178.802	-288.011	-113.001	-262.275	-113.868	-309.982	-213.52	-215.717	-220.729	-160.039	-233.755	-431.993	-207.457	-199.947	-175.047
35.459	90.913	-183.784	-178.542	-264.823	-147.042	-361.261	-183.33	-374.855	-220.807	-243.36	-250.066	-216.581	-303.632	-515.786	-316.385	-197.73	-221.484
46.007	98.33	-192.262	-186.374	-266.235	-161.957	-375.675	-193.547	-355.157	-224.833	-258	-265.383	-159.957	-330.55	-444.408	-274.452	-205.088	-241.711
67.234	115.052	-221.42	-195.043	-269.138	-175.387	-387.637	-224.097	-358.119	-222.469	-270.358	-278.362	-258.434	-341.343	-458.05	-263.998	-209.835	30.471
42.941	102.999	-114.725	-226.521	-338.808	-141.596	-266.995	-112.259	-325.548	-245.928	-254.594	-259.699	-182.848	108.212	-476.567	-197.733	-238.087	-32.064
-61.815	26.79	-51.612	-119.002	-183.342	-55.441	-152.788	-45.611	-177.09	-145.97	-131.133	-132.884	-79.255	-154.274	-225.511	-92.867	-148.062	-110.76
-30.327	53.729	-41.82	-208.076	-248.415	-110.09	-198.422	-39.252	-234.892	-230.646	-213.865	-215.616	-129.893	-201.091	-279.67	-75.74	-221.303	-166.518
10.388	80.328	-61.031	-337.19	-345.305	-180.834	-298.902	-64.432	-343.357	-373.484	-352.424	-356.045	-210.671	-283.677	-405.584	-115.338	-348.275	-249.022
43.845	101.81	-126.204	-243.932	-406.062	-169.683	-338.006	-127.092	-413.117	-277.655	-295.153	-302.611	-225.718	-291.742	-540.941	-230.593	-269.578	-238.989
40.105	98.781	-128.55	-230.768	-381.81	-159.578	-326.319	-128.84	-397.541	-264.125	-279.492	-286.388	-213.733	-282.535	-553.129	-238.284	-254.653	-31.677
47.712	99.379	-221.397	-167.773	-237.514	-143.155	-365.006	-218.129	-372.313	-208.809	-236.317	-243.062	-141.155	-290.138	-590.163	-319.297	-181.996	-216.919
58.725	107.368	-225.122	-197.228	-271.06	-176.509	-413.19	-225.365	-391.559	-235.299	-274.999	-282.887	-174.509	-338.497	-529.109	-298.934	-213.353	-258.272
64.44	110.654	-257.192	-194.739	-252.901	-181.839	-417.479	-255.594	-370.632	-231.901	-276.972	-284.663	-179.839	-349.513	-476.967	-281.21	-207.563	-267.228
62.558	110.608	-214.411	-206.26	-282.23	-187.068	-406.222	-218.453	-366.055	-236.954	-283.526	-291.389	-185.068	-361.847	-461.835	-257.537	-223.43	-272.044
47.335	105.383	-127.39	-207.012	-312.4	-134.928	-267.232	-123.949	-320.894	-227.146	-238.563	-243.603	-177.446	114.45	-457.808	-229.026	-218.385	-19.878
-13.857	63.66	-45.886	-318.884	-309.108	-165.582	-273.782	-50.492	-310.796	-350.569	-324.875	-326.961	-188.576	-276.472	-364.645	-93.518	-328.313	-235.689
26.331	92.198	-75.261	-284.684	-324.496	-159.825	-258.559	-74.879	-312.524	-300.98	-292.395	-294.971	-184.158	95.05	-399.017	-130.584	-284.295	-79.099
42.5	103.935	-80.204	-261.062	-301.31	-154.523	-243.035	-72.824	-290.321	-273.451	-268.917	-271.294	-176.183	101.647	-351.29	-132.617	-254.794	-67.238
13.71	81.48	-90.227	-166.05	-243.654	-94.583	-205.351	-83.048	-243.73	-189.251	-185.461	-188.7	-126.323	-181.462	-326.829	-147.908	-178.536	-142.894
50.315	99.989	-260.021	-147.801	-197.179	-134.953	-365.908	-256.141	-335.085	-191.547	-225.714	-232.748	-132.953	-294.351	-483.202	-294.864	-235.943	-215.704
35.856	99.266	-76.087	-288.824	-318.272	-164.12	-257.932	-72.825	-308.9	-305.803	-295.799	-298.224	-186.618	98.348	-382.291	-129.76	-283.548	-77.127
49.511	104.49	-173.353	-159.943	-244.606	-119.541	-291.948	-169.977	-318.159	-189.27	-211.044	-217.489	-181.057	-246.207	-486.935	-291.783	-174.615	-184.544
-51.499	40.399	-40.608	-190.07	-242.024	-93.887	-185.904	-38.685	-223.98	-216.615	-197.402	-199.537	-116.141	-199.463	-292.23	-73.699	-212.026	-156.83
-9.965	59.6	-168.298	-102.299	-168.48	-73.675	-266.969	-164.593	-262.309	-151.868	-164.831	-171.206	-146.894	-226.605	-446.962	-264.284	-121.111	-152.091
-10.306	58.938	-163.435	-124.767	-197.491	-97.253	-297.88	-163.557	-291.155	-175.678	-191.105	-197.821	-174.78	-268.463	-402.553	-257.238	-145.432	-179.571
11.882	78.396	-99.469	-226.346	-360.045	-141.452	-287.221	-100.735	-347.647	-260.999	-258.296	-262.716	-181.338	-261.755	-418.481	-185.757	-250.8	-202.663
13.639	82.525	-80.804	-233.797	-324.047	-133.057	-247.545	-79.211	-301.796	-260.395	-252.217	-255.811	-164.587	-229.483	-384.884	-139.764	-248.162	-188.522
5.525	77.525	-64.104	-235.6	-294.521	-130.858	-230.082	-59.85	-278.209	-260.015	-247.154	-249.823	-155.839	-215.926	-333.615	-111.053	-245.575	-184.055
21.681	83.29	-148.466	-140.222	-218.823	-96.063	-258.924	-141.336	-290.11	-177.253	-185.533	-190.682	-148.919	-209.564	-412.144	-279.103	-156.283	-157.397
41.336	95.809	-184.531	-178.974	-265.766	-147.185	-358.632	-182.662	-375.388	-220.534	-245.562	-252.756	-218.459	-297.07	-511.816	-315.596	-197.463	-222.627
48.706	99.313	-224.756	-184.493	-254.073	-164.111	-400.945	-222.893	-386.989	-227.718	-259.761	-267.008	-162.111	-324.588	-530.43	-283.559	-275.58	-243.681
55.651	104.925	-229.534	-180.334	-248.506	-160.472	-390.62	-228.301	-370.323	-217.752	-253.001	-260.113	-158.472	-321.554	-509.502	-273.009	-194.909	-238.117
65.011	118.502	-141.521	-218.52	-318.649	-150.68	-280.088	-134.247	-337.428	-233.232	-252.595	-257.953	-193.338	120.199	-447.412	-268.173	-223.559	-16.17
37.555	94.996	-166.658	-139.932	-214.823	-99.323	-263.793	-161.018	-286.284	-170.08	-184.829	-190.109	-153.895	-215.227	-455.229	-292.934	-152.922	-158.713
61.759	108.534	-266.398	-170.882	-223.136	-158.931	-392.128	-264.988	-348.738	-206.932	-248.083	-255.059	-156.931	-326.686	-470.526	-290.146	-181.304	-239.406
12.389	81.017	-85.548	-236.328	-340.912	-136.451	-257.961	-86.035	-313.966	-263.304	-257.502	-261.401	-170.649	-241.815	-409.992	-151.622	-253.629	-194.223
21.106	85.424	-117.198	-183.228	-289.495	-115.224	-256.649	-115.064	-303.729	-212.644	-216.516	-221.297	-159.69	-228.154	-430.486	-207.951	-201.479	-173.684
36.29	91.772	-187.796	-164.306	-244.32	-134.181	-340.339	-187.157	-346.366	-203.694	-226.962	-233.517	-203.476	-289.661	-488.183	-304.01	-181.861	-207.365
60.863	108.647	-235.011	-204.208	-275.439	-184.823	-430.123	-234.691	-410.194	-245.294	-287.393	-295.818	-182.823	-339.823	-557.839	-271.779	-219.708	-269.686
54.53	108.853	-158.339	-210.577	-331.647	-157.029	-332.903	-157.814	-388.31	-238.984	-264.85	-272.145	-217.422	-280.813	-573.555	-293.766	-229.947	-13.357
60.653	115.167	-144.095	-178.225	-260.669	-118.867	-245.694	-136.132	-290.201	-197.026	-209.109	-213.93	-160.484	120.232	-431.067	-251.207	-185.077	-8.663
56.923	109.185	-194.627	-152.224	-225.255	-119.127	-296.936	-192.614	-305.868	-175.932	-203.827	-209.94	-181.22	-243.953	-472.315	-302.049	-163.34	-2.164
56.39	107.633	-206.062	-163.666	-238.043	-135.105	-334.283	-203.835	-340.287	-195.394	-224.515	-231.181	-202.995	-274.595	-500.276	-307.685	-177.562	-204.525
53.704	106.403	-196.251	-149.99	-222.76	-117.129	-299.933	-191.373	-316.74	-180.192	-203.67	-209.785	-179.072	-241.231	-521.397	-322.458	-162.232	-180.932
4.102	73.568	-97.442	-180.622	-281.099	-108.414	-241.051	-92.686	-291.202	-215.779	-211.125	-215.34	-147.904	-215.007	-361.895	-175.805	-201.278	-167.435
8.174	74.791	-111.124	-198.749	-323.012	-129.61	-289.27	-110.3	-345.616	-238.038	-237.964	-242.836	-175.55	-256.481	-419.683	-208.102	-223.999	-193.76
27.639	88.576	-141.086	-182.19	-293.647	-129.894	-305.061	-141.935	-346.744	-218.058	-233.571	-240.205	-191.286	-273.567	-513.67	-253.595	-204.061	-200.412
17.799	80.242	-122.807	-212.789	-331.682	-155.912	-336.083	-122.19	-395.299	-262.616	-273.445	-280.305	-215.273	-283.101	-414.707	-238.616	-239.723	-231.803
46.565	93.675	-318.898	-215.89	-251.665	-198.244	-416.029	-309.345	-437.625	-274.409	-295.379	-300.708	-263.953	-280.686	-426.599	-356.541	-220.768	-267.202
48.399	94.842	-306.913	-230.173	-265.219	-211.025	-406.972	-298.861	-433.91	-290.845	-312.008	-317.438	-275.599	-278.843	-409.931	-334.201	-234.439	-279.286
32.113	82.17	-334.684	-184.948	-217.735	-170.553	-407.298	-325.113	-399.114	-239.468	-254.445	-258.548	-232.455	-275.399	-437.854	-415.612	-190.278	-235.325
32.603	80.891	-372.553	-182.598	-210.768	-170.932	-427.65	-370.861	-391.222	-231	-242.474	-245.359	-168.932	-274.21	-461.145	-466.842	-186.472	-227.402
51.862	92.951	-472.19	-237.979	-261.859	-230.45	-500.864	-469.086	-474.174	-286.459	-302.387	-305.066	-228.45	-304.417	-509.74	-417.334	-239.6	-287.22
-35.716	40.714	-96.457	-93.49	-147.233	-52.03	-172.509	-88.4	-183.307	-125.515	-119.567	-122.003	-87.139	-147.198	-233.041	-171.728	-112.555	-103.098
20.874	86.993	-94.671	-238.961	-365.27	-142.729	-275.906	-94.763	-340.919	-269.955	-268.823	-273.976	-183.95	-252.8	-453.379	-167.384	-259.135	-204.74
-2.452	66.934	-106.67	-202.723	-335.658	-130.989	-292.927	-108.981	-347.182	-242.869	-240.986	-245.703	-176.894	-271.488	-431.077	-201.958	-231.235	-197.299
22.137	85.046	-134.641	-146.553	-231.941	-94.238	-243.205	-129.811	-276.157	-177.681	-184.059	-188.902	-142.988	-207.085	-416.739	-233.156	-162.749	-152.613
24.313	86.802	-136.033	-140.499	-222.124	-89.386	-235.695	-131.189	-266.032	-169.998	-177.475	-182.371	-138.512	-200.047	-415.975	-229.848	-155.552	-147.174
25.599	88.524	-127.318	-158.974	-250.249	-100.209	-241.815	-122.566	-281.659	-188.036	-194.178	-199.125	-147.091	-208.594	-425.293	-219.307	-174.657	-157.742
30.163	92.402	-122.334	-183.611	-287.827	-116.46	-256.147	-119.241	-304.971	-211.411	-217.96	-223.095	-162.242	-224.058	-449.756	-214.67	-199.883	-174.355
35.054	95.382	-131.89	-196.423	-315.783	-132.051	-288.905	-129.755	-346.213	-228.819	-240.528	-246.758	-184.75	-250.287	-512.634	-240.757	-215.928	-196.2
32.529	92.942	-136.909	-189.089	-304.971	-130.025	-294.93	-135.209	-346.3	-222.972	-235.904	-242.233	-185.65	-256.706	-524.071	-250.325	-209.427	-196.156
31.499	90.867	-150.709	-179.452	-284.873	-129.513	-308.569	-147.306	-358.129	-218.979	-233.297	-239.856	-188.579	-258.066	-517.749	-288.576	-199.665	-198.225
47.8	98.901	-232.475	-159.823	-221.255	-141.295	-367.101	-229.27	-352.178	-201.84	-233.064	-240.083	-139.295	-300.246	-505.209	-272.756	-172.862	-219.501
57.675	104.379	-289.35	-188.464	-238.995	-175.169	-438.402	-281.912	-410.993	-235.102	-268.006	-274.72	-173.169	-316.364	-579.118	-326.46	-198.556	-253.485
14.961	80.15	-111.164	-169.4	-260.285	-104.662	-235.794	-107.999	-274.534	-196.562	-196.024	-199.57	-141.734	-207.094	-356.931	-199.214	-185.921	-156.773
22.865	86.086	-128.034	-141.043	-221.656	-87.133	-225.772	-123.035	-256.616	-168.575	-174.06	-178.592	-132.807	-192.466	-394.059	-215.052	-155.523	-142.362
55.664	105.144	-229.622	-175.342	-241.554	-156.577	-383.709	-228.562	-359.429	-213.201	-251.488	-259.135	-154.577	-323.001	-487.401	-266.618	-189.473	-237.87
63.935	110.144	-260.814	-187.07	-241.568	-176.027	-402.511	-259.642	-353.424	-222.496	-268.735	-276.227	-174.027	-351.954	-450.255	-276.035	-198.795	-261.93
45.617	100.152	-179.925	-175.31	-265.422	-139.355	-334.905	-179.845	-354.5	-210.053	-236.77	-243.919	-207.859	-287.316	-504.452	-304.317	-193.238	-212.156
46.013	104.562	-127.601	-200.032	-301.338	-129.258	-259.442	-125.303	-307.485	-217.987	-229.933	-234.94	-172.593	112.525	-459.309	-220.17	-211.283	-26.529
51.926	108.605	-132.993	-226.483	-352.153	-152.818	-296.308	-132.154	-356.329	-246.772	-264.032	-269.991	-200.89	116.422	-512.8	-239.911	-241.66	-19.402
42.822	102.299	-124.663	-217.069	-340.875	-141.17	-281.532	-123.557	-341.477	-240.848	-253.935	-260.004	-190.029	-248.926	-510.955	-217.764	-233.417	-30.536
31.553	93.226	5.02	-162.668	-100.401	-187.463	-202.418	4.186	-116.16	-160.668	-160.668	-160.668	-185.463	55.303	-220.201	-5.285	-19.506	-209.171
18.949	86.739	-75.404	-278.679	-341.332	-155.478	-266.002	-75.906	-327.131	-302.184	-292.21	-295.579	-184.718	-249.18	-417.823	-132.516	-287.485	-65.89
3.579	70.641	-119.798	-141.381	-222.441	-88.391	-231.441	-114.038	-261.348	-174.099	-173.021	-176.641	-129.687	-197.863	-346.093	-216.254	-159.699	-143.193
0.582	70.123	-104.068	-129.694	-205.126	-73.311	-200.812	-97.013	-230.367	-159.677	-157.423	-161.126	-112.955	-174.118	-327.504	-174.979	-146.637	-127.196
10.605	80.61	-76.759	-240.859	-333.235	-136.297	-252.895	-74.237	-312.135	-272.093	-261.873	-265.869	-169.556	-234.708	-386.844	-133.903	-257.468	-195.506
10.914	79.266	-96.3	-182.946	-280.589	-108.111	-235.042	-90.916	-285.103	-214.91	-211.408	-215.723	-147.145	-209.279	-369.764	-167.92	-201.059	-165.434
38.247	91.864	-232.743	-112.664	-161.018	-94.786	-304.681	-225.974	-284.282	-154.995	-179.611	-185.667	-92.786	-229.595	-522.467	-307.568	-121.73	-166.655
33.374	88.653	-213.824	-100.941	-149.148	-80.817	-278.493	-206.699	-260.54	-141.018	-161.871	-167.449	-148.435	-207.334	-473.191	-289.417	-110.088	-148.45
65.789	108.038	-401.053	-203.872	-231.447	-199.242	-458.869	-392.738	-410.113	-259.5	-300.203	-307.475	-197.242	-325.426	-484.986	-320.861	-207.253	-288.889
65.151	107.479	-402.66	-211.358	-240.256	-206.047	-465.679	-391.452	-420.215	-267.978	-308.106	-315.454	-204.047	-328.008	-489.165	-317.363	-215.285	-295.477
59.238	103.031	-391.489	-198.632	-229.926	-191.547	-473.462	-382.597	-421.14	-252.262	-285.438	-291.488	-273.167	-315.6	-529.883	-344.796	-202.959	-272.052
28.739	92.815	-82.358	-303.464	-396.89	-180.095	-313.987	-84.094	-385.517	-337.446	-335.503	-341.347	-221.369	-284.269	-447.305	-145.737	-326.01	-54.46
9.105	76.657	-102.775	-160.814	-248.227	-95.749	-223.742	-96.88	-263.262	-190.277	-187.464	-191.152	-133.158	-196.086	-347.196	-181.403	-177.94	-149.163
0.19	71.67	-82.977	-168.003	-249.21	-94.281	-206.239	-76.936	-246.641	-195.304	-188.039	-191.202	-125.82	-187.684	-317.272	-142.408	-184.458	-146.383
-20.362	61.131	-43.367	-232.639	-259.231	-122.504	-208.901	-40.882	-249.847	-254.599	-236.946	-238.769	-141.918	-212.851	-305.174	-77.755	-242.093	-180.039
2.112	70.235	-126.936	-159.598	-260.868	-106.444	-275.553	-122.805	-319.342	-204.273	-208.834	-214.78	-163.327	-239.962	-435.777	-237.666	-183.423	-177.311
36.652	94.78	-153.242	-183.981	-291.485	-136.982	-320.475	-152.694	-361.078	-220.519	-240.524	-247.658	-201.89	-279.801	-529.89	-276.598	-204.865	-209.122
58.958	110.572	-191.089	-188.772	-281.425	-153.627	-352.184	-190.166	-376.746	-220.116	-253.467	-261.214	-223.713	-293.653	-541.452	-322.17	-205.835	-2.6
35.61	94.9	-131.257	-217.437	-356.634	-152.842	-326.377	-129.492	-398.076	-256.423	-270.567	-277.619	-208.934	-275.746	-521.016	-250.611	-241.37	-222.313
40.839	94.654	-207.311	-159.625	-231.123	-131.829	-344.718	-202.016	-358.734	-201.95	-224.324	-230.721	-129.829	-268.808	-564.061	-354.543	-174.135	-203.064
46.911	98.668	-219.885	-171.162	-241.76	-146.452	-371.389	-215.514	-381.205	-213.866	-240.558	-247.337	-144.452	-289.648	-594.5	-329.237	-185.627	-220.577
51.034	101.184	-239.476	-169.101	-231.771	-149.032	-381.696	-234.175	-379.261	-212.47	-242.222	-249.125	-147.032	-293.217	-578.653	-339.348	-181.751	-225.052
0.473	70.501	-94.902	-164.923	-253.344	-96.319	-220.287	-90.051	-259.543	-194.444	-188.731	-191.977	-130.55	-197.957	-330.046	-167.597	-183.491	-149.581
6.055	75.087	-97.642	-147.316	-227.137	-83.347	-203.697	-91.105	-239.025	-174.715	-171.55	-175.13	-119.727	-180.047	-333.654	-162.812	-163.151	-135.485
18.938	83.954	-111.108	-180.097	-279.203	-111.56	-246.191	-106.324	-295.445	-211.51	-211.926	-216.368	-152.52	-214.4	-387.424	-199.069	-197.376	-168.019
1.883	74.104	-80.735	-182.358	-266.035	-100.471	-210.27	-75.931	-254.838	-208.795	-201.291	-204.747	-132.566	-196.035	-346.089	-134.193	-198.137	-154.346
61.986	109.177	-261.48	-159.099	-209.49	-147.584	-370.695	-259.614	-330.346	-195.632	-239.062	-246.575	-145.584	-314.803	-441.762	-278.936	-168.873	-231.159
76.754	118.238	-341.171	-203.15	-236.679	-200.617	-418.235	-334.684	-362.024	-246.342	-303.613	-312.28	-198.617	-367.188	-432.9	-275.019	-209.679	-301.907
64.131	109.719	-294.126	-178.584	-226.116	-167.823	-420.731	-288.449	-379.829	-221.161	-260.717	-267.968	-165.823	-321.595	-534.909	-309.111	-272.375	-249.805
65.46	110.701	-286.784	-197.562	-248.528	-186.412	-442.417	-280.696	-400.941	-242.604	-285.162	-293.198	-184.412	-334.88	-526.713	-300.786	-208.129	-272.812
55.557	107.853	-194.251	-175.038	-260.669	-139.463	-332.355	-192.253	-360.733	-205.881	-234.983	-241.969	-205.032	-269.785	-579.504	-345.024	-189.561	-208.05
37.159	98.245	-123.616	-216.564	-355.044	-142.158	-292.905	-123.323	-359.151	-246.596	-263.004	-270.569	-199.81	-265.403	-533.402	-212.476	-237.663	-34.831
11.867	80.101	-87.52	-208.118	-302.218	-121.898	-238.131	-84.162	-288.737	-235.804	-229.457	-232.899	-153.556	-216.266	-351.968	-155.607	-223.694	-175.43
1.574	75.256	-56.13	-295.437	-312.534	-157.008	-257.988	-56.502	-309.519	-321.73	-303.123	-305.68	-181.829	-252.07	-373.386	-102.179	-300.364	-88.846
-27.256	55.889	-48.394	-203.446	-255.464	-106.31	-197.962	-45.055	-238.809	-228.751	-212.143	-214.386	-128.705	-201.159	-294.87	-84.873	-219.857	-164.098
5.121	73.092	-111.364	-196.749	-327.279	-127.29	-290.308	-110.982	-350.305	-238.779	-240.209	-245.834	-177.405	-261.546	-454.303	-206.79	-223.507	-196.036
45.895	97.39	-221.511	-166.152	-229.901	-148.55	-372.047	-218.903	-345.427	-208.178	-240.82	-248.039	-146.55	-315.672	-453.8	-264.282	-180.661	-228.95
45.202	96.749	-210.311	-189.936	-261.36	-170.39	-403.57	-208.861	-381.162	-236.342	-269.285	-277.112	-168.39	-328.785	-479.034	-279.653	-206.729	-254.339
59.389	110.386	-194.018	-197.601	-292.133	-162.957	-368.447	-194.632	-389.112	-227.98	-263.221	-270.804	-232.69	-304.512	-546.61	-327.332	-214.975	-2.11
36.878	96.493	-128.522	-216.56	-351.07	-146.619	-305.248	-126.679	-373.743	-250.653	-261.746	-267.995	-197.054	-261.092	-512.276	-241.531	-237.588	-210.44
41.798	101.428	-115.408	-247.212	-382.099	-159.187	-297.094	-116.755	-361.489	-266.932	-280.348	-285.9	-203.516	-263.425	-498.614	-208.071	-263.59	-34.653
21.638	88.488	-78.509	-286.588	-357.026	-161.027	-275.3	-79.343	-341.999	-311.289	-302.769	-306.546	-192.317	-256.87	-438.146	-138.185	-296.84	-63.109
26.2	86.417	-144.069	-180.689	-284.733	-128.217	-300.372	-141.93	-344.16	-216.682	-225.329	-230.477	-179.522	-255.392	-469	-279.28	-200.842	-190.273
33.903	92.133	-158.411	-172.795	-269.977	-126.971	-307.627	-155.233	-346.838	-209.881	-224.62	-230.702	-185.457	-257.63	-514.696	-298.968	-191.488	-193.233
50.842	103.452	-180.171	-207.691	-312.695	-170.023	-382.5	-181.699	-411.174	-244.236	-275.985	-283.799	-240.165	-318.551	-565.039	-321.938	-228.804	-246.192
61.326	108.634	-250.645	-188.831	-250.374	-173.311	-414.437	-248.607	-379.766	-227.994	-269.497	-277.256	-171.311	-336.339	-510.13	-294.6	-202.061	-256.644
73.646	116.392	-320.022	-218.267	-261.668	-210.258	-468.738	-315.216	-412.831	-267.434	-320.178	-329.755	-208.258	-348.755	-503.305	-290.254	-227.23	-307.898
59.098	105.749	-276.515	-195.451	-248.124	-182.946	-441.264	-270.151	-405.469	-243.261	-281.293	-289.019	-180.946	-329.06	-528.506	-303.316	-206.597	-267.755
49.584	102.863	-171.841	-214.499	-327.93	-169.883	-375.441	-170.066	-443.539	-256.594	-281.935	-289.714	-234.167	-295.483	-586.267	-353.1	-235.567	-242.756
40.129	96.804	-151.287	-212.259	-338.128	-157.816	-343.177	-152.377	-402.866	-247.898	-267.633	-274.356	-215.837	-291.491	-556.777	-290.238	-234.797	-226.279
56.388	108.734	-176.164	-212.431	-325.286	-170.567	-373.39	-176.467	-419.297	-246.656	-280.223	-288.539	-240.061	-307.177	-597.398	-328.207	-233.286	-7.696
47.045	104.809	-122.007	-254.835	-411.62	-169.943	-320.087	-122.657	-395.422	-280.111	-295.897	-302.269	-167.943	-276.267	-534.798	-225.591	-275.203	-22.507
-82.815	14.479	-44.642	-289.487	-358.759	-153.013	-299.997	-62.838	-354.721	-327.146	-310.479	-314.152	-189.21	-348.956	-429.087	-110.778	-335.829	-242.802
28.581	87.883	-162.107	-152.992	-238.553	-111.065	-288.091	-158.7	-314.904	-188.655	-202.043	-207.631	-168.924	-242.32	-487.983	-296.609	-170.185	-175.678
14.583	83.504	-73.866	-230.625	-296.938	-130.396	-229.907	-70.172	-278.016	-252.104	-243.043	-245.805	-155.819	-212.411	-343.292	-127.774	-238.898	-180.457
20.304	88.434	-57.934	-310.901	-297.473	-169.94	-258.393	-56.028	-297.476	-328.604	-312.991	-314.639	-189.164	-60.426	-358.82	-102.334	-300.228	-94.091
24.918	92.113	-50.526	-319.09	-262.92	-178.658	-250.336	-47.813	-269.133	-326.718	-316.037	-316.351	-190.669	-72.949	-342.41	-87.383	-290.593	-119.306
26.694	92.931	-66.003	-311.092	-312.91	-170.541	-263.957	-64.012	-309.776	-329.85	-315.641	-317.798	-192.386	-55.073	-386.464	-113.904	-302.771	-89.387
26.051	90.743	-97.432	-212.636	-312.033	-126.369	-245.852	-93.416	-299.3	-237.709	-235.898	-239.976	-161.575	-218.742	-401.411	-168.532	-225.964	-179.248
46.305	103.635	-142.666	-197.372	-311.348	-136.258	-292.422	-139.455	-348.533	-225.845	-241.662	-247.958	-189.047	-247.226	-527.489	-263.618	-214.113	-22.586
58.052	110.503	-183.674	-187.508	-284.018	-147.666	-336.498	-181.493	-375.158	-218.382	-247.981	-255.48	-213.787	-277.479	-583.248	-333.438	-204.073	-4.887
58.336	113.813	-134.532	-226.346	-342.778	-151.225	-285.129	-130.832	-345.79	-244.121	-260.209	-265.888	-196.016	116.445	-507.412	-241.107	-237.191	-23.383
22.598	87.329	-92.79	-273.781	-405.479	-165.533	-302.199	-97.331	-374.095	-296.272	-301.429	-306.262	-204.739	-280.603	-484.723	-172.278	-293.673	-57.271
55.445	110.676	-146.369	-209.357	-322.032	-146.41	-294.622	-145.432	-345.105	-227.203	-249.018	-254.961	-196.733	119.781	-506.791	-269.561	-222.287	-15.431
51.206	107.665	-143.778	-187.85	-285.195	-127.279	-267.486	-140.696	-313.298	-206.983	-224.042	-229.501	-174.864	118.031	-474.716	-256.612	-198.774	-18.053
33.81	97.127	-87.7	-292.518	-367.459	-169.102	-283.668	-88.674	-350.988	-312.219	-309.422	-313.465	-201.948	-39.33	-465.81	-152.376	-300.655	-52.179
48.222	108.335	-80.171	-336.515	-325.507	-190.392	-278.595	-76.844	-319.727	-347.848	-339.523	-341.564	-211.329	98.863	-417.211	-133.487	-249.7	-93.518
49.277	107.984	-106.216	-266.262	-363.869	-163.874	-277.38	-103.982	-342.084	-280.065	-286.487	-290.709	-197.402	107.278	-458.84	-184.828	-271.309	-50.82
33.278	92.372	-144.723	-182.981	-285.516	-129.113	-295.108	-139.462	-351.967	-221.258	-231.863	-237.732	-181.313	-240.684	-454.593	-290.649	-201.349	-192.229
50.309	100.548	-227.049	-190.353	-261.694	-168.174	-409.523	-223.956	-412.448	-235.484	-266.664	-274.045	-166.174	-316.427	-583.062	-301.582	-205.756	-247.157
46.039	99.923	-180.373	-192.326	-289.959	-154.863	-363.453	-178.046	-404.24	-233.613	-259.101	-266.638	-223.3	-293.452	-587.798	-342.778	-211.669	-229.383
47	103.068	-158.183	-183.247	-284.811	-133.667	-302.272	-157.861	-339.248	-209.844	-231.356	-237.718	-191.871	-259.849	-507.892	-283.035	-200.012	-18.441
11.467	77.94	-104.219	-184.04	-284.068	-113.102	-245.76	-100.863	-290.823	-214.04	-210.773	-214.347	-149.313	-218.113	-363.247	-190.586	-202.762	-167.038
10.04	77.599	-94.538	-205.162	-311.339	-123.746	-252.166	-92.346	-302.761	-235.441	-229.726	-233.21	-157.509	-227.758	-365.21	-173.376	-224.466	-178.55
23.035	86.674	-117.942	-179.478	-281.323	-113.22	-253.424	-114.386	-299.394	-209.196	-211.967	-216.515	-156.187	-221.488	-414.169	-210.29	-196.908	-169.772
49.937	105.735	-155.249	-185.622	-286.963	-132.235	-291.716	-153.073	-335.599	-210.781	-229.851	-235.875	-186.061	-245.981	-511.952	-284.214	-200.637	-16.974
27.971	86.815	-166.003	-166.051	-257.186	-126.221	-320.654	-162.671	-351.902	-207.825	-223.819	-230.183	-189.458	-265.461	-520.461	-319.435	-185.238	-196.895
40.659	96.807	-170.877	-173.67	-267.27	-132.365	-320.666	-167.809	-357.596	-210.916	-230.322	-236.903	-194.876	-266.114	-549.336	-319.892	-191.557	-200.975
47.127	98.948	-216.723	-169.479	-240.392	-145.542	-367.397	-213.575	-370.423	-210.711	-238.578	-245.426	-143.542	-296.271	-547.323	-311.599	-252.222	-220.443
23.114	90.721	-51.205	-323.766	-268.895	-179.041	-254.481	-49.331	-274.932	-332.982	-320.958	-321.408	-192.149	87.167	-348.351	-90.054	-299.954	-116.032
40.178	102.759	-52.706	-370.076	-262.632	-211.618	-278.904	-50.402	-270.487	-373.386	-368.076	-368.076	-221.376	-67.219	-359.618	-90.154	-207.373	-130.933
32.147	96.86	-67.897	-302.743	-303.322	-169.639	-256.189	-64.401	-299.112	-315.946	-305.249	-307.04	-188.924	-53.453	-372.678	-115.032	-290.248	-90.882
6.106	69.952	-158.325	-146.643	-222.874	-107.814	-288.119	-152.689	-314.515	-188.939	-193.549	-197.861	-159.225	-232.714	-401.051	-331.195	-165.367	-169.648
49.367	104.568	-149.991	-219.617	-349.944	-166.174	-350.744	-151.593	-401.844	-251.496	-277.255	-284.863	-229.904	-304.457	-548.233	-274.025	-243.119	-18.758
36.4	96.277	-124.277	-222.961	-362.576	-150.067	-308.548	-123.581	-375.103	-256.131	-266.222	-272.327	-199.931	-267.517	-506.239	-228.86	-244.907	-213.659
41.678	95.366	-183.918	-200.625	-294.022	-169.424	-397.798	-184.13	-416.044	-246.62	-275.502	-283.537	-244.807	-321.97	-546.761	-321.383	-221.462	-250.727
40.354	94.633	-188.593	-186.627	-275.307	-155.779	-376.638	-187.683	-397.892	-231.093	-258.788	-266.53	-230.18	-310.344	-559.914	-327.762	-206.013	-235.388
40.272	90.286	-311.105	-163.851	-201.473	-149.739	-394.515	-301.741	-382.534	-217.158	-239.519	-244.799	-147.739	-271.497	-492.319	-399.094	-169.928	-221.555
41.713	91.747	-295.439	-161.024	-201.877	-146.954	-392.894	-287.022	-373.416	-211.527	-234.899	-240.374	-144.954	-273.028	-525.477	-386.544	-168.137	-218.552
39.591	90.245	-289.001	-165.746	-209.229	-151.201	-401.266	-280.617	-382.484	-217.262	-240.891	-246.56	-149.201	-281.715	-537.684	-372.571	-173.965	-224.573
-4.565	64.089	-144.955	-138.562	-224.067	-96.539	-278.455	-141.196	-303.381	-183.985	-189.865	-195.324	-156.017	-238.553	-443.146	-271.617	-160.677	-167.02
-40.782	43.538	-78.01	-178.443	-292.223	-100.1	-240.1	-77.766	-289.035	-222.716	-209.135	-213.337	-141.679	-236.285	-362.009	-141.917	-212.12	-170.952
-97.542	4.095	-50.243	-92.175	-153.617	-36.464	-136.293	-44.719	-152.406	-119.497	-104.753	-106.4	-61.437	-139.41	-207.861	-89.238	-125.22	-94.686
-55.286	27.516	-95.422	-51.555	-103.325	-15.441	-152.244	-88.989	-144.282	-86.089	-80.661	-83.793	-60.015	-124.296	-256.727	-142.955	-74.792	-72.019
-76.872	16.931	-58.106	-66.18	-124.209	-16.052	-123.932	-51.224	-134.178	-96.037	-83.37	-85.868	-49.159	-117.914	-229.534	-90.569	-94.822	-73.15
-84.878	10.741	-50.115	-61.702	-116.16	-12.785	-113.703	-43.004	-123.328	-90.039	-76.698	-78.88	-42.394	-110.507	-209.757	-79.804	-94.99	-69.182
39.997	99.927	-121.62	-223.491	-353.389	-145.426	-288.577	-121.22	-350.581	-248.313	-260.399	-266.283	-192.996	-254.469	-508.423	-217.755	-241.061	-33.739
34.302	90.637	-175.927	-180.42	-273.405	-142.677	-347.26	-174.608	-380.387	-221.803	-240.566	-246.941	-206.408	-287.751	-555.99	-333.83	-199.941	-213.349
35.232	93.755	-150.459	-187.857	-298.352	-135.89	-312.347	-149.58	-361.25	-223.245	-239.504	-245.946	-194.057	-268.264	-534.635	-279.153	-208.23	-203.329
40.604	99.884	-125.27	-219.086	-346.253	-144.686	-290.692	-123.997	-352.623	-246	-256.706	-262.319	-191.082	-252.141	-495.442	-228.896	-236.75	-32.089
54.926	105.775	-186.411	-210.403	-303.37	-181.968	-395.215	-192.225	-371.978	-239.721	-281.67	-289.362	-260.216	-355.546	-469.52	-282.368	-230.993	-263.795
53.257	107.231	-147.157	-232.505	-350.456	-183.234	-359.376	-156.69	-360.012	-246.357	-284.49	-291.051	-250.598	-339.495	-435.65	-256.086	-254.745	-16.037
23.903	87.271	-110.995	-214.756	-337.483	-136.426	-277.534	-110.561	-334.834	-244.229	-246.78	-251.331	-177.177	-247.21	-429.545	-205.284	-234.197	-194.092
15.312	83.48	-85.155	-213.605	-303.791	-122.618	-235.336	-81.438	-286.81	-239.59	-233.109	-236.691	-154.359	-214.895	-370.662	-146.391	-227.358	-175.887
29.423	91.69	-118.984	-191.769	-299.169	-121.987	-261.096	-115.376	-314.039	-221.08	-225.772	-230.714	-165.593	-226.09	-432.812	-214.772	-208.49	-179.183
40.658	98.4	-141.689	-212.812	-344.875	-152.493	-327.264	-141.24	-391.854	-247.897	-265.255	-272.171	-209.508	-278.88	-556.424	-267.768	-235.234	-220.513
38.446	97.774	-137.995	-170.546	-264.308	-112.683	-257.236	-134.031	-299.341	-196.662	-207.351	-212.547	-160.548	-218.325	-452.283	-242.804	-184.665	-169.248
49.556	104.82	-169.235	-166.569	-255.514	-122.43	-291.024	-167.117	-321.686	-193.295	-215.773	-222.148	-181.846	-244.764	-503.668	-295.627	-180.95	-13.323
19.067	87.786	-53.494	-335.315	-283.106	-179.048	-264.665	-53.431	-288.536	-349.228	-333.695	-334.613	-195.861	-70.849	-375.507	-95.201	-313.728	-111.638
35.664	99.269	-59.088	-413.819	-292.954	-215.624	-302.976	-59.899	-298.498	-424.346	-411.819	-411.847	-233.375	-70.944	-414.904	-103.672	-300.034	-118.876
17.841	87.004	-54.309	-291.345	-280.732	-160.993	-243.114	-51.264	-280.45	-306.852	-292.155	-293.559	-178.221	-62.99	-336.098	-94.767	-281.232	-96.476
23.7	91.285	-59.693	-276.858	-276.539	-155.066	-233.53	-55.29	-272.945	-288.742	-277.402	-278.813	-171.704	-60.593	-339.938	-100.084	-265.995	-96.694
22.303	85.692	-105.131	-251.634	-413.625	-162.084	-317.283	-109.309	-388.257	-283.414	-289.183	-294.561	-206.453	-290.024	-490.626	-199.812	-278.198	-226.564
35.329	96.427	-119.391	-198.093	-306.15	-125.797	-261.546	-115.526	-315.419	-224.619	-230.607	-235.592	-168.777	-225.971	-445.885	-212.954	-213.101	-181.489
46.485	105.239	-123.015	-217.178	-330.755	-139.311	-270.725	-119.786	-329.014	-237.941	-249.03	-254.456	-183.162	111.75	-486.958	-215.591	-229.497	-27.623
41.644	100.89	-127.912	-205.612	-322.574	-135.057	-278.755	-124.759	-337.463	-232.156	-243.371	-249.103	-182.45	-239.01	-492.612	-232.217	-221.44	-29.77
32.735	93.967	-128.424	-163.849	-253.922	-104.141	-241.985	-122.612	-285.195	-191.483	-198.707	-203.721	-149.934	-204.63	-423.73	-225.493	-177.767	-159.98
48.302	107.244	-113.593	-246.16	-362.149	-153.692	-276.2	-110.898	-340.494	-264.387	-273.539	-278.824	-194.333	108.059	-487.439	-194.693	-256.365	-42.436
69.343	121.578	-156.547	-224.259	-342.614	-160.803	-306.81	-153.16	-367.421	-239.676	-267.038	-273.796	-213.176	122.431	-543.031	-289.517	-235.379	-217.25
59.775	114.648	-136.196	-242.385	-379.76	-165.438	-309.27	-132.859	-383.138	-263.956	-284.073	-290.724	-214.238	118.551	-530.203	-250.974	-256.758	-14.176
52.448	107.213	-157.638	-205.317	-320.3	-151.129	-322.954	-153.615	-391.275	-239.053	-261.105	-268.341	-208.653	-259.419	-537.291	-318.329	-223.002	-14.193
60.56	109.794	-234.468	-161.542	-226.416	-139.515	-355.143	-231.299	-353.769	-196.779	-230.938	-238.121	-137.515	-282.578	-554.739	-293.053	-173.389	-213.596
20.096	88.116	-73.431	-260.29	-314.939	-144.766	-243.902	-70.799	-299.696	-280.303	-270.707	-273.669	-171.022	-227.011	-387.735	-124.555	-264.469	-74.885
16.845	85.387	-79.893	-204.243	-275.744	-114.721	-213.712	-74.364	-260.343	-225.018	-218.788	-221.986	-143.153	-196.056	-349.806	-131.902	-212.988	-163.855
35.914	96.022	-131.926	-203.516	-329.717	-137.692	-296.512	-130.481	-357.229	-236.164	-249.293	-255.802	-191.522	-258.57	-531.411	-239.829	-223.965	-203.24
54.798	107.924	-177.077	-192.727	-293.665	-152.726	-344.739	-176.927	-375.681	-224.152	-255.017	-262.752	-221.311	-293.437	-529.471	-308.882	-211.401	-8.426
64.702	116.53	-182.367	-187.875	-284.644	-145.893	-322.047	-181.091	-356.951	-210.836	-244.863	-252.563	-211.906	129.253	-538.558	-323.167	-202.143	-0.174
29.722	95.416	-69.927	-280.775	-299.521	-157.171	-243.593	-65.805	-292.332	-295.115	-284.961	-287.102	-178.292	-53.573	-373.926	-115.837	-273.315	-88.791
37.864	97.471	-141.583	-166.124	-260.303	-110.397	-258.765	-138.012	-298.748	-193.117	-205.942	-211.643	-162.526	-223.645	-473.668	-240.818	-181.095	-170.302
39.383	96.311	-164.631	-169.556	-262.733	-129.269	-314.348	-163.262	-342.076	-205.342	-226.5	-233.401	-195.419	-271.768	-488.616	-285.752	-187.997	-200.257
42.37	97.924	-176.835	-164.014	-249.489	-129.642	-321.954	-174.924	-340.852	-200.877	-225.486	-232.681	-199.939	-276.625	-480.693	-296.066	-181.321	-203.134
27.182	86.517	-150.319	-183.825	-283.987	-143.328	-336.321	-147.957	-369.435	-228.26	-249.654	-257.233	-212.312	-285.957	-446.104	-277.112	-205.562	-221.794
13.441	83.023	-55.534	-309.855	-300.749	-169.401	-261.363	-55.008	-299.842	-329.105	-312.796	-314.424	-188.303	-246.706	-348.547	-103.191	-303.132	-88.344
9.681	81.302	-58.332	-245.447	-275.289	-135.173	-220.669	-54.115	-264.85	-263.278	-250.39	-252.39	-155.281	-209.862	-325.45	-99.327	-246.789	-83.202
37.724	99.404	-86.213	-332.547	-408.077	-198.396	-334.718	-88.931	-392.816	-362.187	-365.687	-372.308	-242.541	-301.933	-490.456	-152.736	-357.05	-47.515
17.76	85.536	-78.945	-278.994	-365.084	-157.944	-276.13	-79.45	-345.854	-307.573	-299.809	-304.087	-191.817	-257.212	-427.727	-141.174	-293.461	-64.51
65.39	113.975	-237.109	-152.464	-213.233	-132.749	-338.78	-236.438	-324.127	-181.285	-221.165	-228.476	-209.061	-278.413	-473.125	-265.533	-162.391	-207.045
73.338	122.915	-187.362	-214.447	-322.508	-173.979	-358.837	-187.912	-390.993	-233.742	-276.438	-284.739	-243.394	132.543	-532.998	-332.727	-230.35	7.127
59.113	111.23	-188.454	-181.03	-271.527	-143.638	-331.352	-187.622	-356.9	-208.405	-240.381	-247.696	-210.403	-275.878	-531.028	-323.439	-196.209	-3.085
53.267	110.321	-123.513	-248.261	-383.704	-162.185	-297.773	-121.481	-367.456	-268.027	-283.548	-289.706	-208.211	113.04	-521.772	-218.886	-262.178	-31.935
27.893	92.671	-94.951	-237.534	-345.992	-139.812	-260.903	-92.773	-321.791	-263.339	-261.867	-266.541	-177.385	-236.519	-447.221	-162.15	-251.637	-50.283
35.879	97.518	-113.652	-203.977	-309.552	-126.479	-254.188	-109.379	-310.005	-228.985	-233.96	-238.923	-167.815	-221.055	-440.731	-197.918	-217.408	-36.996
16.273	84.848	-57.579	-289.573	-297.45	-161.956	-252.098	-55.25	-292.583	-308.99	-293.867	-295.532	-180.096	-233.606	-330.128	-105.586	-286.098	-78.83
9.171	81.019	-53.249	-257.193	-272.725	-142.034	-225.164	-48.909	-266.643	-274.5	-260.451	-262.186	-160.809	-214.449	-318.207	-91.911	-255.839	-87.768
8.814	80.924	-54.059	-251.626	-270.365	-138.477	-221.118	-49.744	-263.295	-268.856	-255.025	-256.819	-157.359	-211.18	-319.56	-92.248	-250.845	-78.619
-16.481	63.346	-41.91	-194.355	-225.812	-103.72	-180.153	-35.883	-213.709	-211.306	-197.855	-199.402	-120.532	-179.904	-264.423	-72.549	-202.181	-152.655
-16.514	58.97	-77.285	-104.323	-167.415	-46.814	-153.11	-70.083	-175.302	-128.659	-122.18	-125.124	-79.523	-138.275	-281.148	-119.907	-121.222	-96.576
20.283	78.843	-206.259	-85.322	-130.476	-67.587	-267.353	-200.042	-238.556	-128.993	-149.75	-155.484	-139.826	-203.37	-450.893	-258.305	-95.129	-139.601
8.419	70.404	-175.924	-139.903	-201.823	-105.93	-286.116	-168.876	-303.405	-181.16	-185.692	-189.349	-153.905	-223.481	-374.167	-368.512	-154.486	-163.087
-2.032	70.659	-74.304	-264.899	-386.458	-153.473	-293.21	-76.712	-365.97	-311.085	-299.321	-304.861	-195.151	-278.022	-412.103	-138.081	-296.784	-227.439
60.32	111.601	-197.74	-182.645	-271.009	-148.911	-347.662	-195.497	-376.484	-214.567	-248.173	-256.007	-219.49	-284.282	-589.549	-339.518	-198.216	-0.331
49.639	103.445	-180.552	-185.631	-281.914	-145.759	-341.597	-176.982	-387.195	-223.475	-248.547	-255.933	-211.403	-274.856	-595.8	-352.76	-203.255	-217.099
-34.038	50.326	-52.373	-262.087	-323.995	-135.764	-251.232	-56.433	-309.967	-295.33	-275.369	-278.438	-164.498	-263.677	-380.78	-101.512	-286.525	-207.157
16.375	83.404	-97.337	-201.413	-307.293	-119.412	-246.315	-94.037	-299.497	-230.952	-228.185	-232.497	-157.483	-222.271	-401.097	-169.419	-218.952	-176.22
46.733	101.065	-188.284	-159.3	-240.07	-125.503	-316.67	-185.765	-336.264	-193.904	-219.021	-225.904	-192.945	-264.983	-521.467	-312.947	-174.733	-196.115
33.073	93.31	-145.333	-164.723	-261.83	-112.59	-273.521	-141.989	-313.066	-197.01	-210.354	-216.467	-169.094	-236.28	-497.506	-255.371	-182.109	-177.048
24.722	89.022	-114.325	-184.168	-289.824	-113.292	-249.761	-110.485	-300.088	-213.419	-217.407	-222.57	-158.563	-221.389	-446.255	-196.477	-201.204	-172.214
52.434	102.851	-236.401	-155.16	-216.109	-135.058	-356.374	-232.366	-350.243	-195.524	-226.513	-233.515	-133.058	-283.432	-546.908	-315.792	-167.103	-210.797
56.458	107.033	-227.154	-146.189	-208.772	-122.528	-327.162	-222.426	-327.351	-180.659	-210.798	-217.527	-120.528	-259.146	-546.267	-316.485	-157.226	-193.252
59.631	108.893	-226.128	-183.221	-256.752	-159.646	-385.06	-224.331	-385.951	-220.322	-257.485	-265.283	-157.646	-309.528	-560.507	-319.074	-197.766	-237.934
49.999	100.925	-209.938	-195.638	-275.433	-170.381	-405.288	-208.761	-409.221	-239.518	-271.28	-278.98	-168.381	-323.081	-556.832	-308.565	-213.151	-250.009
39.263	92.542	-207.022	-187.705	-263.839	-162.455	-396.445	-203.793	-410.359	-236.785	-263.953	-271.382	-160.455	-308.4	-538.849	-332.42	-204.691	-242.658
-28.169	53.39	-36.079	-391.069	-285.295	-188.139	-300.511	-46.939	-301.831	-414.943	-390.888	-392.113	-211.04	-92.144	-402.566	-85.189	-379.819	-273.712
23.02	90.84	-47.376	-341.26	-265.029	-186.576	-262.006	-45.83	-274.186	-350.451	-338.131	-338.294	-200.434	-76.215	-354.246	-82.784	-306.887	-123.455
39.91	102.663	-56.459	-392.387	-272.612	-213.896	-287.89	-55.476	-279.498	-397.25	-390.387	-390.387	-226.348	-79.058	-389.599	-95.658	-205.056	-132.854
8.929	81.323	-36.448	-286.967	-237.43	-161.614	-227.57	-33.365	-245.615	-295.077	-283.505	-283.759	-172.181	-83.299	-303.624	-65.432	-255.863	-124.116
-1.319	72.537	-61.789	-170.366	-224.063	-90.665	-176.171	-54.985	-211.127	-188.315	-179.074	-181.272	-112.44	-166.796	-283.11	-100.717	-179.731	-136.08
19.084	88.213	-47.772	-325.194	-267.738	-176.894	-254.228	-45.973	-275.502	-337.103	-322.455	-323.048	-192.063	-75.133	-350.236	-83.115	-300.984	-118.199
8.114	80.69	-44.996	-264.367	-254.067	-146.835	-220.786	-40.575	-254.085	-277.438	-263.679	-264.786	-161.706	-213.211	-305.462	-77.792	-256.264	-81.276
19.643	82.375	-147.547	-126.106	-201.858	-82.533	-241.182	-142.11	-262.336	-159.337	-168.553	-173.718	-136.86	-201.647	-428.397	-247.583	-141.746	-143.923
32.468	91.753	-147.846	-183.604	-290.372	-131.128	-304.871	-143.542	-362.432	-223.496	-236.845	-243.335	-187.713	-251.379	-498.815	-292.955	-203.318	-198.377
35.366	98.506	-91.459	-244.077	-321.808	-142.616	-246.399	-87.566	-301.945	-261.205	-259.344	-262.911	-172.475	-34.231	-409.76	-153.523	-248.644	-59.453
-41.106	43.408	-27.353	-400.393	-275.771	-196.909	-309.86	-41.678	-301.322	-437.048	-401.598	-402.958	-220.546	-344.498	-375.483	-77.83	-398.323	-298.139
48.227	107.816	-90.886	-336.51	-373.42	-194.304	-303.866	-90.383	-357.795	-351.938	-351.061	-355.181	-226.189	102.026	-482.22	-154.527	-318.215	-77.483
50.896	110.356	-77.67	-369.33	-317.16	-205.126	-289.487	-75.149	-313.328	-379.21	-368.956	-370.236	-224.037	97.741	-426.263	-128.213	-222.182	-106.793
45.479	106.684	-65.538	-350.794	-282.3	-198.915	-270.102	-61.879	-284.559	-355.615	-348.017	-348.152	-211.452	93.291	-380.273	-107.823	-208.958	-120.592
3.188	76.248	-28.492	-353.189	-223.611	-200.368	-269.606	-34.133	-240.76	-353.331	-351.189	-351.189	-207.86	-106.427	-340.248	-63.564	-306.043	-163.288
-33.599	48.674	-72.109	-174.683	-275.287	-99.126	-229.31	-68.838	-275.818	-216.565	-204.282	-208.495	-140.157	-221.096	-321.031	-130.024	-204.02	-167.034
38.316	97.095	-140.451	-194.7	-308.572	-137.024	-300.677	-142.075	-342.064	-222.378	-240.363	-246.653	-193.63	-268.215	-480.257	-245.345	-214.415	-202.515
22.296	88.969	-86.084	-231.816	-319.498	-132.738	-243.256	-83.082	-297.062	-254.882	-249.501	-253.214	-164.49	-222.646	-401.689	-145.512	-242.681	-55.219
57.067	105.304	-263.914	-158.805	-210.765	-144.793	-378.995	-258.833	-355.328	-201.396	-236.789	-244.009	-142.793	-296.928	-519.9	-234.497	-168.827	-224.619
59.137	106.617	-276.556	-146.227	-192.594	-133.543	-365.114	-272.249	-334.836	-186.206	-219.709	-226.182	-131.543	-279.496	-529.527	-313.36	-154.24	-208.616
-25.043	56.917	-33.972	-316.473	-266.636	-162.29	-254.335	-38.453	-277.348	-338.014	-315.72	-316.731	-179.337	-268.682	-335.199	-74.078	-312.456	-233.797
18.58	86.949	-69.678	-218.249	-269.542	-123.25	-211.831	-63.348	-254.825	-235.767	-227.069	-229.446	-145.51	-193.766	-320.114	-115.791	-222.043	-64.686
27.126	92.058	-91.524	-199.918	-278.781	-116.251	-221.171	-85.556	-267.972	-220.468	-217.416	-220.825	-146.512	-196.031	-360.437	-152.763	-208.484	-47.684
23.092	90.09	-77.187	-224.639	-284.696	-127.322	-220.949	-71.77	-267.651	-242.484	-235.493	-238.279	-152.311	-201.297	-350.017	-127.767	-228.907	-63.842
28.443	94.665	-50.301	-311.514	-256.178	-177.927	-244.949	-46.67	-261.99	-317.48	-308.313	-308.471	-188.255	-71.827	-331.221	-85.948	-270.444	-120.66
36.945	100.812	-62.76	-308.93	-279.116	-174.896	-248.524	-57.816	-280.062	-317.494	-307.056	-307.992	-189.73	-60.429	-357.512	-102.279	-254.724	-107.831
17.44	86.932	-53.344	-284.202	-270.465	-156.901	-235.136	-50.121	-270.469	-296.979	-283.561	-284.708	-172.301	-66.764	-335.144	-91.593	-272.119	-102.789
16.762	86.8	-39.371	-282.523	-232.548	-162.386	-223.597	-35.138	-239.775	-288.081	-279.147	-279.179	-170.843	-82.15	-302.349	-68.12	-261.223	-127.164
31.599	96.818	-61.625	-341.002	-294.712	-184.758	-269.029	-59.539	-297.803	-354.946	-340.288	-341.495	-203.223	-63.764	-389.996	-103.842	-309.084	-108.711
7.964	80.758	-34.631	-261.381	-224.976	-149.615	-210.65	-29.867	-230.452	-268.145	-257.833	-258.115	-158.601	-81.545	-282.566	-61.001	-244.718	-120.452
-4.699	67.416	-83.575	-250.761	-407.699	-149.183	-298.766	-87.102	-374.059	-294.391	-286.349	-291.599	-191.027	-284.942	-441.484	-160.088	-283.735	-220.826
27.669	90.752	-105.721	-218.732	-336.562	-137.455	-273.171	-101.58	-337.462	-251.965	-252.343	-257.237	-177.775	-235.639	-408.703	-195.098	-236.779	-195.464
29.425	91.507	-119.075	-190.246	-295.481	-122.141	-262.509	-113.809	-318.028	-222.201	-226.198	-231.202	-165.838	-223.096	-415.247	-219.066	-207.006	-179.608
59.693	105.871	-314.362	-169.84	-211.573	-160.009	-421.114	-307.619	-381.053	-217.709	-255.187	-262.313	-158.009	-311.266	-553.614	-319.185	-177.387	-243.831
61.426	106.374	-340.11	-175.881	-212.008	-169.058	-436.456	-332.021	-380.27	-225.362	-264.068	-271.073	-167.058	-320.841	-515.845	-310.317	-182.149	-254.964
66.164	109.412	-374.057	-185.48	-218.11	-179.039	-456.003	-366.373	-401.288	-235.841	-273.915	-280.648	-177.039	-314.25	-539.696	-331.995	-190.054	-262.773
13.831	78.976	-101.061	-159.74	-231.744	-99.442	-215.25	-93.494	-252.37	-187.192	-184.712	-187.782	-131.676	-182.531	-288.151	-187.836	-172.345	-147.143
36	97.795	-88.623	-298.559	-406.939	-183.403	-319.308	-88.368	-393.61	-334.867	-335.261	-341.508	-226.545	-279.466	-436.378	-157.637	-319.98	-35.725
17.596	83.816	-101.471	-166.047	-251.604	-97.663	-218.97	-94.714	-261.591	-193.19	-191.881	-195.863	-135.106	-191.034	-357.617	-173.486	-180.443	-150.123
32.786	93.744	-116.089	-232.233	-378.447	-155.207	-314.585	-113.951	-392.966	-271.998	-280.374	-287.1	-205.697	-267.029	-466.237	-216.822	-256.397	-222.508
2.129	69.513	-101.546	-239.333	-410.232	-155.806	-322.277	-107.67	-390.822	-273.801	-279.032	-284.118	-200.952	-298.351	-479.253	-202.69	-267.622	-221.668
36.149	95.397	-135.99	-193.957	-306.156	-132.661	-290.93	-132.156	-348.445	-227.434	-237.127	-242.75	-181.927	-243.651	-475.199	-261.728	-212.259	-193.355
38.811	97.249	-138.91	-201.649	-319.196	-140.451	-301.962	-135.251	-367.195	-237.073	-249.448	-255.631	-191.815	-249.903	-480.524	-272.98	-220.721	-203.499
50.6	105.323	-165.159	-193.593	-300.411	-144.733	-323.693	-161.362	-380.653	-227.767	-249.509	-256.53	-204.288	-262.661	-573.383	-326.082	-211.174	-211.372
39.438	91.211	-250.741	-167.324	-219.952	-145.416	-368.926	-242.125	-384.704	-215.095	-233.632	-238.824	-207.787	-262.535	-474.026	-425.666	-177.294	-211.575
45.764	102.053	-155.645	-193.303	-303.405	-140.36	-311.974	-152.91	-367.426	-226.276	-244.751	-251.355	-197.211	-259.951	-550.123	-295.682	-211.503	-205.418
56.866	108.227	-201.45	-180.311	-264.834	-148.511	-353.329	-199.375	-376.388	-214.421	-245.759	-253.165	-218.309	-287.175	-578.659	-335.549	-258.8	-221.198
64.023	116.401	-167.823	-210.851	-327.328	-159.104	-331.742	-165.181	-390.192	-236.287	-266.338	-274.038	-220.425	127.685	-595.655	-318.582	-227.394	-3.914
56.494	109.892	-167.121	-206.083	-320.715	-157.004	-340.43	-164.215	-400.571	-238.71	-265.109	-272.719	-155.004	-276.251	-603.337	-326.926	-224.65	-9.552
56.074	103.891	-268.867	-180.791	-235.799	-165.61	-416.154	-262.633	-397.672	-226.034	-259.307	-266.296	-163.61	-310.508	-573.771	-325.19	-191.904	-244.358
-55.148	31.031	-72.699	-133.016	-210.135	-71.651	-189.902	-67.317	-219.258	-168.127	-154.162	-156.565	-102.861	-182.772	-261.114	-134.773	-161.676	-130.83
-37.656	44.029	-83.739	-140.702	-227.16	-77.154	-206.645	-78.472	-242.167	-179.507	-168.57	-172.093	-115.862	-193.965	-308.448	-148.556	-167.819	-139.894
-21.646	58.994	-42.077	-275.788	-296.393	-148.983	-252.754	-44.443	-295.827	-309.845	-286.526	-289.099	-174.995	-255.049	-323.362	-84.245	-293.94	-217.752
49.877	108.774	-103.211	-271.343	-353.475	-165.017	-271.058	-101.185	-333.202	-281.259	-287.329	-291.188	-196.364	104.58	-453.217	-176.169	-272.497	-61.759
53.975	111.039	-120.216	-252.776	-374.976	-162.649	-289.062	-118.343	-354.362	-268.142	-281.899	-287.279	-204.007	111.4	-500.366	-211.626	-262.892	-38.593
63.357	115.787	-170.168	-205.254	-316.218	-155.265	-327.069	-168.589	-377.893	-228.794	-259.235	-266.651	-216.302	127.604	-569.841	-317.909	-220.987	-4.068
45.149	98.626	-179.611	-204.041	-303.918	-168.017	-387.324	-177.912	-429.039	-249.218	-277.066	-285.171	-239.455	-305.967	-565.281	-343.497	-224.725	-246.679
53.959	101.886	-291.791	-180.118	-229.611	-164.014	-422.688	-283.01	-416.755	-230.628	-261.863	-268.756	-162.014	-297.601	-587.707	-357.315	-189.225	-242.537
53.211	100.717	-312.184	-172.116	-214.619	-157.265	-411.561	-302.591	-402.468	-221.828	-249.217	-255.127	-155.265	-281.59	-559.269	-384.455	-178.854	-230.475
53.353	99.332	-356.568	-172.991	-206.149	-163.416	-432.002	-349.768	-392.768	-223.658	-251.248	-256.568	-161.416	-287.567	-549.533	-373.311	-177.378	-236.884
34.518	93.085	-136.055	-216.303	-347.701	-153.949	-325.434	-138.603	-379.511	-246.632	-260.95	-266.545	-205.09	-285.996	-505.635	-258.136	-238.914	-217.035
47.769	103.567	-161.128	-182.574	-283.886	-133.808	-304.503	-159.551	-346.086	-211.428	-232.511	-239.022	-192.582	-258.927	-535.919	-293.266	-199.367	-198.656
48.175	105.37	-142.209	-183.455	-281.133	-123.271	-265.504	-138.269	-312.216	-206.137	-220.426	-225.906	-171.278	-223.786	-477.696	-252.364	-195.936	-20.559
35.374	95.533	-128.57	-205.596	-330.176	-138.112	-294.342	-125.225	-359.686	-240.372	-250.314	-256.488	-188.595	-250.057	-491.701	-240.525	-225.464	-201.561
54.167	109.288	-145.606	-226.662	-364.547	-162.502	-328.998	-143.699	-402.101	-256.107	-278.839	-286.215	-218.667	-272.673	-567.957	-278.087	-246.339	-16.391
43.759	103.523	-117.739	-219.177	-331.784	-137.858	-265.747	-114.18	-325.207	-241.159	-249.587	-254.913	-180.485	-231.407	-477.201	-203.356	-231.539	-30.986
46.58	104.047	-125.859	-249.27	-415.111	-171.176	-334.124	-125.64	-415.099	-281.928	-298.773	-306.083	-224.377	-284.121	-550.287	-234.026	-273.385	-27.309
46.435	103.861	-138.575	-208.499	-331.476	-143.363	-299.34	-135.883	-361.441	-237.544	-253.189	-259.621	-195.626	-253.489	-532.402	-256.983	-226.305	-23.763
58.932	108.756	-224.313	-171.133	-242.756	-144.909	-358.57	-220.423	-373.393	-207.177	-237.955	-244.93	-214.722	-280.261	-616.542	-329.402	-184.174	-216.288
54.936	104.331	-244.211	-161.067	-220.351	-137.555	-355.862	-237.811	-364.672	-199.562	-223.934	-229.627	-135.555	-262.633	-600.665	-308.4	-171.26	-202.933
18.065	82.199	-86.865	-324.802	-463.999	-205.063	-378.461	-96.878	-433.542	-360.002	-373.041	-380.257	-253.541	-354.045	-545.821	-173.996	-370.409	-283.142
39.305	99.27	-101.056	-300.487	-472.755	-191.229	-344.634	-103.027	-438.348	-335.632	-345.12	-352.313	-237.721	-298.515	-528.537	-188.959	-329.196	-40.26
20.749	85.232	-112.602	-177.903	-274.762	-110.749	-245.198	-107.106	-294.593	-209.409	-210.371	-214.861	-151.98	-211.53	-383.868	-202.591	-194.551	-166.886
33.518	93.389	-148.408	-155.374	-245.165	-105.763	-265.426	-143.511	-301.632	-187.523	-199.894	-205.699	-160.73	-223.836	-481.081	-261.652	-171.337	-168.145
40.452	96.236	-186.786	-140.893	-214.175	-107.774	-292.82	-182.121	-307.821	-176.036	-196.468	-202.692	-172.13	-240.244	-511.279	-310.71	-154.944	-175.153
55.113	102.861	-279.53	-155.627	-199.558	-146.426	-382.954	-274.613	-336.098	-199.616	-237.175	-244.234	-144.426	-311.692	-453.686	-283.295	-164.363	-229.537
61.804	106.884	-330.809	-179.168	-216.116	-172.627	-430.458	-321.141	-376.453	-229.739	-271.972	-279.721	-170.627	-327.89	-485.508	-302.682	-185.933	-263.243
66.877	110.389	-351.953	-192.765	-228.181	-186.91	-449.786	-340.441	-392.468	-243.714	-287.798	-295.676	-184.91	-336.358	-495.266	-298.994	-199.182	-278.586
38.873	93.936	-188.558	-152.945	-223.756	-117.723	-302.067	-181.666	-330.613	-190.835	-205.596	-210.805	-173.191	-232.273	-462.811	-385.479	-165.858	-178.577
50.498	101.761	-221.376	-167.646	-237.332	-140.68	-357.095	-215.7	-376.664	-208.679	-233.959	-240.508	-138.68	-271.845	-606.581	-353.118	-180.762	-210.988
-20.563	54.066	-91.325	-156.001	-242.06	-93.495	-223.049	-86.218	-260.15	-191.415	-182.011	-184.919	-127.883	-201.554	-299.345	-175.138	-179.69	-149.875
29.97	87.295	-170.813	-175.994	-262.575	-144.224	-350.675	-167.866	-366.304	-220.538	-243.542	-250.697	-216.037	-292.934	-456.632	-306.149	-195.53	-222.455
0.119	66.047	-173.903	-101.474	-162.496	-73.599	-262.446	-167.716	-259.055	-147.211	-159.307	-164.905	-140.23	-210.631	-430.593	-277.786	-117.65	-145.047
2.089	73.148	-81.736	-138.441	-206.151	-72.445	-174.976	-74.613	-206.709	-160.518	-155.307	-158.284	-102.672	-158.195	-301.714	-130.316	-151.594	-119.984
8.117	79.726	-62.616	-203.093	-251.505	-112.429	-197.523	-56.184	-237.356	-220.817	-211.061	-213.28	-133.848	-185.2	-299.425	-103.988	-208.863	-158.435
2.218	76.424	-49.008	-249.262	-263.061	-136.051	-217.434	-45.192	-257.127	-266.465	-251.671	-253.269	-153.841	-211.101	-310.535	-85.299	-249.199	-186.94
-19.938	61.168	-35.527	-278.27	-264.8	-147.867	-234.645	-36.302	-268.513	-300.037	-279.168	-280.522	-166.338	-240.438	-309.913	-71.205	-281.257	-211.914
5.02	77.472	-56.276	-308.385	-321.582	-164.453	-270.975	-57.314	-320.436	-339.705	-318.718	-321.687	-191.526	-261.677	-381.383	-102.968	-315.846	-83.726
38.469	100.734	-87.194	-298.95	-365.658	-172.21	-283.236	-85.495	-350.456	-318.997	-315.569	-319.666	-203.94	-38.318	-456.124	-149.371	-303.025	-68.862
21.66	84.014	-135.898	-160.304	-250.553	-107.582	-263.001	-129.855	-306.702	-196.953	-202.754	-207.816	-156.529	-218.07	-408.588	-259.349	-177.903	-167.949
2.643	73.465	-75.146	-264.471	-367.031	-151.208	-275.857	-76.907	-340.934	-297.786	-286.008	-289.63	-182.42	-260.739	-387.688	-142.427	-285.449	-213.371
19.087	85.12	-96.176	-195.685	-289.351	-116.313	-235.023	-91.631	-284.145	-222.258	-219.028	-222.736	-150.264	-208.763	-362.964	-169.017	-210.079	-168.473
26.305	88.016	-141.78	-128.999	-204.585	-82.281	-231.017	-135.494	-255	-158.384	-167.1	-172.051	-133.131	-192.764	-412.614	-233.681	-142.985	-139.962
62.467	110.589	-238.644	-177.559	-243.065	-158.729	-386.567	-236.158	-369.107	-214.104	-253.322	-261.031	-156.729	-314.577	-515.029	-269.101	-190.749	-238.346
69.708	116.004	-252.498	-185.866	-248.411	-169.796	-401.174	-250.452	-372.604	-219.583	-264.891	-272.885	-252.507	-326.429	-504.846	-298.683	-198.074	-251.707
47.817	104.865	-136.856	-213.038	-335.195	-145.969	-298.348	-132.829	-365.509	-243.241	-257.009	-263.21	-195.325	-247.152	-500.093	-259.99	-229.925	-22.695
43.771	102.14	-135.713	-197.963	-312.161	-133.393	-284.296	-131.224	-343.925	-227.845	-240.915	-247.138	-184.367	-239.294	-504.307	-249.459	-214.438	-25.652
26.951	90.311	-109.373	-155.14	-232.173	-92.038	-209.1	-102.385	-246.481	-177.941	-179.544	-183.331	-128.373	-178.7	-350.992	-182.919	-166.092	-140.295
39.766	96.771	-170.516	-149.206	-230.269	-108.687	-282.782	-164.695	-312.324	-183.628	-200.661	-206.789	-168.27	-229.934	-511.37	-310.101	-163.82	-173.304
50.948	104.377	-182.459	-188.151	-284.306	-147.925	-343.701	-178.441	-394.72	-226.672	-251.96	-259.391	-212.797	-272.661	-597.61	-366.192	-205.369	-218.751
15.416	82.357	-93.126	-207.824	-306.517	-123.124	-243.673	-91.158	-292.743	-233.922	-229.538	-233.034	-156.019	-221.455	-370.433	-165.001	-223.786	-176.093
17.185	82.352	-117.445	-159.69	-251.585	-98.291	-236.772	-112.832	-275.048	-189.392	-191.252	-195.63	-141.682	-206.826	-394.732	-202.743	-176.814	-154.48
31.393	90.37	-159.973	-163.059	-255.606	-118.853	-299.223	-155.67	-336.362	-201.449	-216.352	-222.628	-178.912	-248.373	-517.305	-305.023	-181.192	-186.514
42.263	93.991	-240.2	-167.751	-227.66	-149.481	-388.882	-235.106	-377.205	-214.784	-242.861	-249.617	-225.718	-299.704	-552.466	-326.101	-180.685	-227.59
49.516	97.968	-267.041	-196.573	-249.564	-184.266	-442.711	-262.302	-400.977	-246.471	-279.919	-287.013	-182.266	-335.339	-510.964	-296.992	-208.667	-267.736
51.345	99.845	-259.572	-192.08	-246.77	-179.354	-431.382	-255.171	-390.649	-240.923	-276.824	-284.384	-177.354	-335.384	-501.443	-291.262	-204.547	-264.693
41.01	96.2	-184.053	-169.967	-256.805	-134.949	-335.669	-181.128	-363.885	-209.736	-232.76	-239.748	-202.684	-276.81	-571.945	-333.571	-187.469	-207.61
24.047	82.522	-185.481	-156.176	-230.737	-124.733	-328.745	-178.978	-353.568	-203.792	-220.26	-226.483	-189.998	-256.722	-477.619	-373.686	-172.83	-196.917
41.282	94.282	-202.583	-188.429	-264.864	-163.543	-390.678	-198.878	-403.034	-237.103	-266.282	-274.065	-161.543	-305.878	-504.307	-321.681	-205.301	-245.211
53.239	102.871	-227.406	-190.333	-260.538	-169.56	-409.043	-224.06	-401.944	-234.605	-267.771	-275.371	-167.56	-318.988	-545.118	-289.334	-282.853	-249.603
-43.614	42.257	-35.207	-288.866	-301.763	-157.299	-263.75	-41.765	-304.04	-328.473	-299.379	-301.389	-179.708	-274.905	-312.738	-83.795	-315.366	-234.115
-55.203	36.794	-34.644	-259.707	-293.799	-136.682	-242.916	-40.184	-289.325	-297.476	-270.014	-272.348	-161.838	-261.836	-314.373	-77.267	-289.045	-213.981
-22.958	58.168	-42.118	-335.171	-299.717	-168.328	-279.148	-50.864	-311.004	-365.54	-339.563	-341.789	-195.314	-296.333	-395.409	-87.676	-344.264	-246.859
30.109	94.446	-88.377	-254.29	-339.716	-147.594	-257.846	-86.111	-317.958	-274.616	-271.042	-274.73	-178.479	-232.968	-419.196	-151.812	-262.221	-58.518
36.982	99.344	-96.75	-241.684	-327.113	-143.628	-251.157	-93.919	-305.926	-257.092	-258.917	-262.701	-175.357	101.861	-421.105	-164.442	-247.164	-55.317
38.996	101.044	-93.587	-255.898	-338.588	-150.579	-258.058	-90.096	-318.89	-274.683	-272.609	-276.4	-181.477	-32.049	-425.851	-158.524	-261.165	-43.922
-17.057	61.076	-51.789	-329.008	-328.683	-171.705	-298.079	-61.867	-336.372	-361.653	-342.445	-345.968	-204.724	-311.449	-421.39	-105.323	-351.826	-249.593
25.276	89.785	-96.169	-263.434	-396.705	-160.691	-298.409	-100.61	-369.033	-288.625	-293.834	-299.295	-204.42	-280.876	-489.143	-171.529	-285.488	-54.033
27.754	87.369	-139.987	-212.921	-347.192	-156.423	-346.827	-142.858	-406.019	-253.187	-269.099	-275.857	-215.559	-303.556	-552.85	-268.398	-239.073	-228.371
-11.073	51.289	-275.005	-123.64	-155.516	-111.779	-352.462	-270.545	-300.24	-178.302	-189.529	-193.326	-177.073	-254.332	-466.71	-353.447	-131.649	-179.845
13.445	80.991	-89.544	-229.076	-336.392	-135.205	-259.14	-89.609	-312.927	-255.822	-250.934	-254.586	-168.59	-239.618	-393.192	-161.743	-246.717	-191.016
23.372	86.747	-117.041	-177.155	-274.25	-111.494	-247.797	-113.214	-289.903	-204.804	-206.732	-210.84	-151.918	-216.392	-392.258	-206.777	-193.526	-165.264
20.222	87.274	-80.249	-234.978	-313.072	-134.699	-241.272	-76.656	-293.313	-258.685	-250.533	-253.696	-162.695	-219.142	-364.857	-139.057	-244.83	-185.692
11.216	80.806	-77.596	-222.085	-303.161	-125.57	-233.536	-74.377	-283.477	-247.2	-238.073	-241.216	-154.159	-216.101	-356.534	-134.535	-234.944	-178.355
29.655	93.027	-103.841	-197.038	-289.93	-118.617	-236.707	-99.048	-285.693	-219.989	-220.468	-224.441	-153.912	-207.464	-388.931	-178.94	-208.782	-169.067
15.821	81.7	-108.211	-167.541	-259.072	-101.296	-231.792	-103.157	-273.311	-196.383	-195.488	-199.448	-140.201	-202.888	-369.978	-188.779	-184.064	-155.122
-11.614	62.357	-82.218	-175.476	-266.172	-102.01	-224.453	-77.173	-268.52	-209.66	-199.872	-203.153	-135.793	-205.528	-314.689	-150.408	-197.422	-159.256
8.696	74.35	-135.867	-141.734	-227.25	-93.72	-256.646	-130.428	-287.152	-179.655	-184.513	-189.475	-146.019	-216.967	-411.704	-247.116	-160.958	-156.714
8.916	79.642	-80.283	-214.981	-306.997	-120.476	-234.197	-76.602	-288.616	-243.762	-235.724	-239.727	-154.565	-218.233	-383.64	-135.454	-230.839	-177.829
29.527	92.254	-116.93	-184.901	-287.254	-115.35	-250.646	-112.117	-300.853	-213.184	-217.38	-222.308	-158.83	-217.537	-431.541	-204.124	-200.48	-171.764
-27.687	53.499	-23.666	-363.201	-249.866	-189.742	-282.835	-35.498	-272.25	-376.935	-360.313	-360.619	-207.715	-94.599	-330.606	-66.628	-345.627	-130.476
-0.379	64.799	-143.817	-53.365	-97.626	-28.321	-191.119	-138.072	-167.726	-87.57	-97.064	-101.354	-85.357	-138.837	-326.2	-184.954	-65.197	-86.912
8.357	73.587	-146.39	-112.107	-181.941	-73.028	-236.789	-139.681	-250.178	-148.755	-156.284	-161.255	-128.927	-194.046	-394.812	-243.696	-128.488	-135.764
30.509	88.371	-181.247	-135.88	-207.908	-104.679	-295.838	-176.614	-302.916	-174.676	-193.159	-199.286	-170.934	-241.736	-475.085	-308.595	-150.994	-174.228
25.43	89.373	-111.818	-180.434	-277.57	-110.147	-239.852	-107.016	-287.343	-207.858	-209.9	-214.432	-151.087	-209.714	-406.294	-193.101	-195.555	-164.968
27.782	92.623	-92.982	-238.563	-338.641	-139.625	-256.201	-90.958	-314.719	-262.329	-260.029	-264.295	-174.688	-232.489	-431.033	-159.369	-250.802	-50.855
40.955	94.837	-199.371	-173.976	-252.959	-142.618	-356.693	-194.426	-385.773	-217.739	-239.459	-246.028	-208.717	-275.847	-566.674	-380.489	-189.951	-214.027
26.478	84.531	-177.684	-116.205	-174.464	-85.016	-257.863	-170.136	-263.933	-151.305	-162.343	-166.725	-138.063	-196.18	-398.553	-306.296	-127.762	-142.273
53.794	110.424	-112.947	-295.752	-462.802	-196.869	-347.132	-114.5	-430.857	-320.392	-338.27	-345.598	-248.436	-12.067	-550.361	-198.454	-321.568	-35.057
20.679	85.77	-100.699	-176.177	-261.679	-105.896	-224.94	-93.937	-269.473	-202.772	-200.971	-204.665	-140.809	-194.518	-343.904	-177.197	-189.605	-156.477
23.778	89.602	-84.884	-263.755	-353.683	-152.146	-266.734	-84.665	-330.61	-286.789	-281.773	-285.519	-183.607	-245.173	-419.541	-149.664	-274.823	-57.56
11.373	81.185	-67.417	-302.587	-343.784	-164.819	-279.962	-69.757	-335.674	-329.94	-315.696	-318.985	-193.542	-266.978	-417.246	-122.422	-313.184	-75.24
26.52	92.549	-72.748	-267.232	-307.326	-151.146	-243.887	-69.23	-294.779	-283.878	-274.713	-277.117	-173.626	-222.391	-364.732	-124.233	-266.073	-75.71
11.817	78.498	-115.441	-159.481	-253.959	-98.277	-241.207	-109.92	-283.928	-193.5	-194.733	-199.478	-143.943	-209.726	-396.702	-204.265	-178.358	-157.94
18.592	84.234	-114.46	-174.726	-278.703	-107.57	-248.972	-110.102	-297.626	-207.173	-210.204	-215.417	-154.356	-219.892	-433.723	-198.316	-193.374	-168.354
37.066	93.815	-175.525	-159.296	-244.309	-122.504	-312.724	-172.662	-337.074	-196.968	-216.913	-223.459	-187.89	-262.556	-525.748	-313.207	-176.335	-192.612
48.015	100.581	-212.939	-149.066	-216.456	-124.621	-331.04	-210.238	-331.417	-186.853	-215.873	-222.905	-122.621	-273.227	-508.663	-300.692	-162.484	-199.187
55.191	104.509	-246.752	-157.147	-214.451	-140.295	-367.114	-243.168	-349.194	-197.521	-231.974	-239.187	-138.295	-294.85	-515.534	-304.357	-168.497	-218.775
51.95	102.467	-234.337	-154.49	-214.985	-135.574	-356.516	-230.138	-346.145	-195.498	-227.606	-234.825	-133.574	-287.646	-510.409	-304.172	-166.628	-213.238
55.652	104.602	-254.918	-156.592	-210.69	-141.526	-371.674	-249.761	-352	-199.505	-235.131	-242.632	-139.526	-295.121	-511.037	-303.708	-167.166	-222.497
15.838	82.948	-92.195	-227.55	-339.109	-134.646	-260.265	-91.8	-316.577	-255.284	-251.632	-255.673	-170.182	-239.696	-408.164	-164.518	-245.336	-191.665
27.545	91.878	-92.012	-232.732	-326.622	-137.953	-252.123	-88.822	-307.143	-256.306	-252.669	-256.294	-169.24	-224.492	-386.828	-162.001	-243.859	-50.214
31.006	93.687	-109.173	-223.773	-354.576	-140.651	-281.765	-106.221	-349.375	-256.263	-260.628	-266.4	-185.934	-246.765	-469.507	-194.581	-243.206	-202.419
35.468	93.97	-141.687	-207.694	-334.233	-150.416	-331.588	-139.331	-401.084	-249.369	-264.472	-271.544	-208.241	-273.977	-511.549	-277.335	-230.643	-220.49
37.06	91.934	-194.597	-169.149	-246.978	-135.064	-338.209	-189.759	-370.153	-210.727	-227.589	-233.255	-194.74	-264.17	-529.058	-387.528	-184.674	-200.865
53.378	100.747	-297.806	-174.046	-218.576	-164.067	-423.414	-292.424	-374.483	-220.253	-254.227	-260.739	-162.067	-324.53	-526.867	-307.963	-183.246	-244.679
44.848	98.44	-197.415	-173.014	-253.907	-138.681	-341.57	-192.605	-380.538	-214.379	-236.788	-243.473	-202.971	-266.654	-584.409	-387.562	-188.255	-208.297
46.585	97.107	-248.839	-175.254	-235.016	-155.25	-398.872	-242.584	-398.845	-222.74	-249.88	-256.511	-153.25	-293.919	-601.432	-285.85	-187.381	-230.749
50.841	99.835	-270.592	-173.455	-226.14	-157.87	-409.164	-263.767	-392.505	-221.372	-252.41	-259.315	-155.87	-301.504	-585.449	-335.294	-183.93	-236.684
42.98	94.971	-240.437	-159.514	-218.834	-139.958	-374.08	-234.811	-369.052	-206.674	-234.915	-241.895	-216.252	-286.91	-587.494	-336.62	-171.752	-218.101
-62.291	26.975	-79.587	-68.845	-132.236	-20.574	-147.102	-72.97	-156.117	-104.008	-94.687	-98.261	-64.548	-133.41	-278.811	-119.761	-110.557	-81.839
-58.045	32.073	-66.801	-121.532	-200.362	-56.384	-172.957	-61.076	-204.329	-158.628	-144.781	-148.221	-93.468	-171.94	-288.425	-110.473	-161.875	-120.834
44.172	98.308	-163.063	-225.238	-345.598	-181.274	-398.747	-163.523	-462.305	-272.334	-299.967	-308.624	-250.402	-315.147	-556.913	-323.444	-249.65	-260.842
52.256	106.638	-175.882	-166.65	-254.026	-124.117	-296.131	-172.433	-331.019	-195.013	-218.259	-224.792	-184.072	-243.001	-542.93	-319.986	-227.053	-9.954
-28.317	51.504	-94.547	-139.843	-233.26	-77.214	-217.541	-89.697	-257.054	-182.003	-175.396	-180.213	-124.914	-202.975	-361.872	-160.912	-166.404	-145.181
58.468	114.69	-71.551	-446.315	-294.221	-299.189	-392.35	-79.921	-292.874	-444.315	-444.315	-444.315	-326.058	-57.981	-446.752	-125.572	-164.421	-111.159
36.487	92.444	-185.688	-156.878	-232.991	-120.688	-309.882	-179.391	-342.647	-197.16	-213.247	-219.026	-179.649	-242.427	-497.167	-377.797	-171.412	-185.662
59.937	111.144	-199.629	-184.585	-273.023	-150.659	-351.765	-197.141	-384.504	-217.897	-251.297	-259.163	-220.941	-283.869	-605.052	-347.197	-200.182	-0.443
70.118	121.683	-130.753	-321.522	-513.029	-236.03	-401.813	-134.796	-451.778	-330.059	-373.056	-380.993	-293.553	122.419	-572.775	-247.109	-350.027	-39.066
3.378	65.255	-202.482	-67.288	-103.087	-53.105	-258.378	-198.397	-213.289	-115.566	-131.856	-136.748	-123.872	-185.53	-429.815	-240.331	-76.04	-123.833
57.127	105.214	-255.55	-178.783	-236.063	-164.286	-406.157	-251.51	-373.853	-221.874	-260.753	-268.513	-162.286	-326.614	-506.649	-294.983	-191.078	-248.33
-12.002	63.313	-75.454	-184.376	-271.258	-103.109	-215.265	-71.839	-258.806	-214.618	-203.931	-206.897	-132.775	-203.833	-311.842	-132.329	-204.323	-158.984
52.311	109.744	-48.872	-411.967	-236.3	-343.602	-416.509	-58.974	-241.971	-409.967	-409.967	-409.967	-350.726	97.413	-449.721	-97.737	-141.672	-25.484
19.623	79.992	-174.968	-157.795	-241.111	-125.704	-335.727	-173.508	-351.231	-205.507	-225.725	-232.941	-199.527	-286.504	-503.207	-306.356	-177.359	-205.428
17.69	86.421	-39.991	-321.242	-250.332	-184.065	-252.59	-38.281	-260.503	-329.888	-318.65	-318.897	-194.649	-73.326	-306.347	-75.941	-270.465	-114.443
101.387	146.777	-144.966	-406.252	-419.949	-281.647	-359.086	-139.338	-376.478	-402.738	-422.605	-426.668	-315.012	121.744	-454.599	-223.035	12.185	-93.224
19.941	86.241	-83.739	-265.424	-370.498	-157.339	-280.941	-82.357	-350.3	-300.785	-294.101	-298.712	-193.164	-252.772	-389.683	-154.324	-284.022	-219.117
30.999	91.072	-131.084	-214	-344.219	-149.286	-316.216	-128.228	-394.715	-257.155	-267.366	-273.965	-201.377	-263.268	-457.957	-260.911	-236.767	-216.574
48.489	105.402	-138.557	-211.096	-331.724	-144.669	-296.422	-135.439	-359.682	-238.541	-253.668	-259.769	-194.215	-248.179	-513.81	-260.827	-227.378	-22.136
50.1	101.762	-220.917	-160.08	-228.403	-133.11	-344.26	-215.604	-361.75	-199.944	-225.876	-232.496	-131.11	-266.072	-617.899	-358.67	-172.778	-203.683
-56.502	37.038	-21.699	-224.932	-229.608	-118.427	-196.346	-21.683	-226.864	-245.718	-226.004	-226.94	-132.867	-214.513	-254.108	-51.429	-238.66	-183.739
70.987	123.361	-90.722	-508.152	-346.145	-323.111	-440.328	-97.029	-324.68	-506.152	-508.174	-508.986	-355.595	112.163	-562.06	-164.67	-157.582	-86.318
15.568	81.752	-82.937	-258.385	-360.34	-157.838	-279.244	-81.103	-344.14	-293.871	-285.144	-288.988	-189.6	-246.98	-345.093	-160.706	-274.379	-216.447
20.622	87.326	-94.445	-189.644	-277.168	-109.275	-221.412	-88.855	-270.499	-214.061	-212.003	-216.079	-144.671	-198.935	-378.497	-156.909	-201.937	-161.799
35.989	99.198	-69.221	-380.704	-330.717	-202.747	-304.128	-69.635	-329.086	-401.509	-385.451	-387.868	-227.191	-53.58	-439.116	-121.019	-361.519	-94.861
60.502	115.927	-100.295	-387.964	-410.577	-238.362	-366.238	-103.472	-380.103	-394.038	-413.095	-418.693	-278.51	109.62	-546.283	-177.68	-284.337	-67.021
66.434	115.775	-217.259	-179.34	-257.91	-151.401	-356.859	-215.764	-369.815	-208.918	-247.751	-255.625	-224.825	-289.127	-548.838	-328.176	-192.703	7.546
57.67	113.312	-134.371	-224.123	-338.034	-149.303	-281.625	-130.376	-342.688	-242.123	-257.824	-263.413	-193.387	116.271	-497.963	-241.379	-234.403	-22.979
55.581	106.078	-223.315	-169.074	-239.42	-141.232	-353	-217.357	-379.382	-208.7	-236.353	-243.242	-139.232	-266.815	-623.213	-379.705	-181.501	-211.559
52.965	105.326	-204.373	-156.287	-228.969	-124.026	-315.623	-198.937	-341.538	-191.112	-215.666	-222.151	-187.696	-245.772	-577.094	-361.789	-168.518	-190.354
62.817	111.134	-234.417	-185.699	-256.548	-163.999	-393.339	-232.785	-387.331	-222.08	-261.852	-269.774	-161.999	-315.147	-552.673	-287.53	-199.612	-243.452
51.84	105.982	-174.007	-186.383	-286.112	-141.727	-324.136	-171.09	-373.423	-219.121	-243.81	-250.912	-203.605	-264.196	-587.237	-338.516	-202.93	-209.361
-2.442	71.587	-72.795	-233.351	-330.113	-129.094	-249.369	-72.01	-307.295	-266.657	-254.655	-258.706	-163.565	-239.239	-389.683	-127.405	-254.449	-192.107
8.861	80.059	-67.93	-274.355	-331.873	-149.157	-258.8	-67.83	-319.628	-301.659	-287.84	-291.257	-178.495	-247.549	-405.654	-119.039	-285.562	-75.481
12.038	79.122	-110.884	-181.799	-292.853	-112.97	-259.512	-107.428	-312.424	-218.043	-219.084	-224.261	-159.63	-230.645	-422.729	-197.314	-203.156	-175.92
49.682	105.032	-154.18	-209.55	-332.104	-154.529	-330.502	-153.786	-388.576	-240.145	-262.84	-269.853	-213.294	-279.658	-572.085	-289.003	-229.584	-18.002
43.366	101.213	-144.046	-198.274	-317.038	-138.749	-302.207	-141.956	-360.779	-229.636	-247.378	-254.22	-195.348	-258.249	-550.33	-265.617	-217.134	-24.584
65.317	118.684	-136.752	-271.043	-434.003	-189.637	-338.449	-136.248	-419.604	-286.252	-315.245	-322.451	-241.179	119.398	-559.993	-252.547	-287.452	-34.779
59.687	114.214	-138.893	-240.247	-372.44	-166.199	-310.628	-137.041	-377.932	-257.908	-280.036	-286.166	-213.54	119.515	-522.436	-262.894	-253.041	-13.789
70.67	123.567	-108.45	-397.136	-402.265	-250.848	-364.891	-110.516	-368.078	-394.799	-413.735	-417.985	-286.336	111.383	-524.113	-190.08	-184.181	-76.155
73.144	125.611	-113.457	-379.77	-413.2	-237.644	-348.296	-113.101	-377.177	-381.152	-397.966	-402.544	-271.239	112.695	-521.646	-196.165	-178.914	-72.951
52.207	106.046	-185.695	-155.743	-234.241	-117.715	-293.131	-181.572	-320.848	-185.124	-208.573	-214.924	-178.337	-236.651	-533.351	-327.988	-168.217	-181.444
47.64	104.94	-144.462	-177.393	-271.859	-119.257	-262.128	-139.548	-309.992	-201.785	-216.552	-222.249	-168.486	-218.551	-476.752	-257.963	-189.625	-19.696
41.132	97.046	-180.324	-155.388	-236.857	-118.425	-302.615	-177.921	-324.452	-188.975	-210.465	-216.814	-181.854	-253.906	-512.663	-308.314	-170.805	-186.124
-51.828	39.747	-40.801	-163.841	-218.158	-78.81	-166.013	-35.909	-201.528	-189.39	-172.308	-174.578	-101.463	-176.914	-273.703	-68.854	-185.101	-138.411
-53.884	36.528	-7.345	-244.751	-200.827	-138.851	-202.359	-9.151	-211.939	-255.298	-242.45	-242.556	-148.781	-221.713	-227.185	-36.011	-242.301	-205.859
-49.229	39.354	-7.29	-256.177	-202.217	-146.831	-210.454	-10.228	-215.998	-265.769	-253.74	-253.832	-156.83	-229.049	-233.511	-37.05	-250.218	-214.448
45.272	104.899	-58.177	-544.553	-282.347	-286.814	-388.164	-66.002	-286.596	-542.553	-542.553	-542.553	-305.229	-65.475	-471.647	-111.177	-263.6	-117.78
47.215	106.301	-60.479	-548.856	-286.331	-289.741	-392.533	-68.292	-289.283	-546.856	-546.856	-546.856	-309.136	-55.414	-477.73	-114.61	-253.865	-115.828
52.184	109.1	-100.428	-348.608	-444.961	-224.905	-375.314	-105.466	-409.538	-368.175	-388.156	-395.296	-273.57	-19.297	-559.442	-181.955	-382.44	-46.57
23.132	86.073	-124.906	-186.105	-295.77	-122.049	-273.705	-121.427	-328.467	-221.251	-226.241	-231.473	-169.128	-235.552	-437.719	-234.082	-205.658	-183.185
58.078	104.406	-321.294	-146.757	-180.106	-140.684	-390.164	-314.903	-335.739	-196.052	-236.614	-243.958	-138.684	-300.913	-468.49	-295.306	-151.876	-229.37
52.656	100.14	-297.954	-127.89	-160.493	-120.576	-361.776	-293.501	-305.479	-173.044	-205.137	-210.997	-118.576	-263.811	-493.975	-309.723	-132.203	-197.067
53.598	100.593	-311.332	-127.346	-156.266	-121.576	-370.679	-308.352	-309.024	-176.46	-211.889	-218.208	-119.576	-268.109	-486.01	-313.93	-130.452	-204.146
61.169	106.055	-342.355	-146.521	-174.009	-141.502	-400.529	-338.694	-339.778	-197.954	-237.808	-244.867	-139.502	-285.704	-495.25	-319.634	-149.025	-229.009
54.536	102.054	-313.939	-139.621	-174.895	-131.431	-380.602	-306.136	-334.919	-189.109	-225.944	-232.995	-129.431	-282.2	-516.252	-313.303	-144.862	-216.412
-6.914	65.437	-106.338	-156.042	-254.769	-93.071	-238.667	-101.856	-282.449	-195.295	-192.707	-197.551	-140.073	-214.893	-387.837	-186.465	-179.373	-157.654
-4.234	68.756	-74.426	-214.657	-306.768	-123.998	-238.314	-71.483	-290.677	-247.852	-236.13	-239.39	-153.831	-222.203	-322.079	-136.356	-233.904	-181.897
45.908	105.233	-48.724	-456.934	-251.793	-302.241	-381.194	-56.504	-260.292	-454.934	-454.934	-454.934	-313.82	-60.46	-422.646	-96.621	-218.768	-127.795
85.809	133.992	-138.17	-327.229	-410.987	-267.806	-402.319	-145.598	-373.6	-317.425	-359.041	-363.522	-330.494	123.595	-454.643	-229.683	-157.083	-40.796
47.377	105.445	-94.638	-348.977	-454.539	-216.393	-363.457	-96.577	-423.873	-384.532	-392.868	-400.293	-258.977	-305.588	-506.864	-175.159	-377.383	-34.9
13.765	79.734	-109.316	-174.241	-268.056	-109.412	-244.757	-102.985	-294.157	-209.508	-208.931	-213.41	-151.181	-210.057	-356.187	-202.065	-192.432	-167.337
48.144	100.572	-208.339	-170.188	-246.822	-141.656	-355.045	-205.426	-373.241	-210.258	-237.989	-245.11	-212.767	-287.039	-586.909	-333.709	-185.501	-215.882
42.188	97.48	-181.963	-168.607	-256.013	-133.32	-332.207	-178.619	-360.012	-208.112	-232.452	-239.759	-202.818	-274.883	-563.785	-331.302	-185.946	-207.408
42.39	92.316	-288.047	-161.481	-202.224	-153.648	-397.743	-281.549	-346.836	-212.676	-246.131	-252.933	-151.648	-320.067	-452.177	-285.833	-170.198	-239.26
47.089	96.378	-290.605	-140.845	-178.763	-132.993	-373.235	-286.041	-324.277	-189.939	-225.427	-232.411	-130.993	-296.488	-455.773	-176.986	-147.832	-218.277
18.542	84.102	-103.491	-181.881	-276.056	-109.478	-234.604	-99.04	-279.425	-208.828	-207.182	-210.97	-145.709	-207.22	-369.353	-181.09	-197.42	-161.918
37.14	95.462	-141.841	-199.519	-314.465	-139.991	-304.867	-139.563	-363.703	-233.569	-244.686	-250.281	-189.924	-256.397	-484.745	-276.704	-218.564	-201.146
57.226	112.052	-103.381	-340.55	-446.4	-235.557	-392.449	-105.342	-429.164	-367.588	-400.382	-409.451	-290.869	-315.76	-453.632	-194.996	-373.954	-25.756
43.367	101.927	-96.089	-279.656	-366.484	-178.404	-291.38	-92.507	-354.209	-305.63	-304.321	-307.964	-206.973	-240.007	-348.531	-187.236	-296.283	-34.653
47.444	105.356	-119.466	-248.339	-395.068	-163.762	-310.249	-116.385	-388.657	-278.929	-289.806	-296.186	-210.166	-260.426	-501.37	-219.746	-267.058	-27.814
44.575	101.639	-134.203	-223.351	-349.85	-154.203	-309.141	-131.042	-381.882	-256.269	-266.833	-272.463	-199.847	-253.731	-461.482	-267.878	-241.289	-212.6
37.324	97.28	-134.955	-188.743	-300.216	-125.919	-277.773	-131.962	-332.012	-218.958	-231.427	-237.576	-178.152	-239.917	-508.16	-242.338	-206.208	-188.486
49.133	102.285	-190.005	-151.973	-223.446	-116.823	-294.383	-184.875	-312.835	-181.407	-198.646	-203.555	-170.725	-232.497	-464.447	-337.023	-163.9	-173.964
60.025	106.891	-278.059	-174.483	-224.951	-162.486	-409.71	-272.66	-372.477	-217.676	-256.021	-263.354	-160.486	-320.407	-516.776	-213.958	-184.711	-244.936
63.593	109.001	-318.716	-176.178	-217.463	-167.161	-426.9	-310.19	-385.873	-225.439	-268.664	-276.825	-165.161	-320.58	-525.114	-309.031	-278.81	-257.352
28.056	92.351	-63.161	-314.213	-315.073	-184.642	-276.7	-60.906	-314.076	-337.252	-323.474	-325.748	-205.383	-245.253	-325.48	-119.25	-309.455	-58.556
13.712	82.317	-79.4	-201.555	-275.935	-115.326	-216.777	-74.163	-262.04	-224.277	-217.182	-220.1	-142.491	-197.363	-324.104	-136.227	-212.193	-164.146
46.437	104.876	-104.028	-289.806	-416.476	-181.012	-310.082	-102.569	-391.731	-315.57	-319.562	-324.397	-216.085	-261.66	-448.746	-193.996	-302.309	-33.056
46.748	100.077	-182.274	-196.685	-293.601	-161.616	-376.494	-181.302	-408.174	-238.301	-265.859	-273.576	-232.712	-307.382	-563.102	-327.508	-216.713	-238.169
49.817	100.65	-235.135	-164.517	-227.871	-140.121	-362.925	-228.623	-378.263	-207.723	-233.182	-239.649	-138.121	-270.038	-609.991	-378.647	-176.312	-211.135
46.465	101.703	-170.337	-181.065	-276.378	-135.478	-313.284	-165.273	-368.306	-218.071	-237.697	-244.4	-194.124	-250.306	-524.118	-348.565	-197.169	-201.304
47.676	101.948	-163.286	-217.224	-337.183	-170.068	-372.27	-161.471	-443.894	-261.186	-287.642	-296.102	-236.193	-295.017	-560.809	-331.135	-239.537	-245.945
26.997	86.751	-148.663	-172.278	-262.191	-122.84	-289.333	-142.399	-341.112	-212.998	-221.145	-226.461	-173.48	-232.872	-410.78	-311.562	-189.478	-184.59
29.207	91.762	-113.404	-218.404	-351.429	-141.674	-291.752	-109.959	-363.925	-256.438	-262.55	-268.919	-190.776	-251.323	-453.659	-207.065	-240.239	-207.303
40.07	102.759	-66.876	-373.083	-305.623	-200.974	-287.353	-65.214	-307.906	-387.061	-372.595	-373.836	-221.285	-59.806	-412.694	-110.658	-273.128	-111.928
-90.942	16.106	-18.181	-176.708	-208.369	-85.726	-163.298	-15.489	-195.648	-201.78	-180.606	-182.238	-103.981	-191.118	-240.917	-40.717	-201.894	-144.743
-19.934	57.096	-1.36	-293.623	-176.107	-208.768	-254.786	-18.039	-202.134	-289.948	-291.623	-291.623	-213.547	-112.518	-266.219	-39.615	-197.663	-134.633
79.446	130.288	-111.252	-444.405	-389.036	-272.923	-372.85	-111.371	-354.953	-439.279	-452.417	-455.462	-301.734	113.124	-521.685	-181.609	-97.252	-313.137
80.855	131.387	-113.504	-437.844	-390.262	-270.755	-367.235	-112.888	-355.817	-432.584	-445.677	-448.714	-299.274	113.188	-513.037	-192.497	-85.361	-91.559
44.859	104.769	-95.779	-322.283	-405.614	-193.438	-320.319	-98.145	-382.558	-342.575	-347.668	-353.171	-233.552	-31.535	-518.134	-166.893	-337.753	-253.57
47.907	107.208	-95.434	-333.023	-394.716	-197.91	-318.29	-97.422	-373.582	-349.969	-354.434	-359.518	-235.754	103.986	-512.235	-164.823	-349.465	-67.104
3.172	73.591	-82.873	-205.199	-297.793	-122.218	-240.172	-78.202	-293.445	-239.347	-231.108	-234.826	-156.189	-217.385	-323.736	-152.285	-223.596	-180.115
65.92	110.287	-343.243	-162.062	-194.803	-156.09	-413.203	-336.975	-361.888	-211.838	-255.991	-263.886	-154.09	-307.973	-495.883	-308.928	-166.649	-247.068
46.887	98.982	-225.918	-151.357	-215.182	-127.646	-342.812	-221.106	-347.323	-192.245	-218.911	-225.558	-125.646	-269.239	-599.748	-335.321	-163.77	-200.525
52.096	101.243	-258.246	-170.184	-225.527	-155.11	-397.929	-253.427	-374.206	-215.489	-249.785	-257.068	-153.11	-312.565	-533.551	-307.847	-181.792	-236.569
58.919	105.549	-311.055	-160.624	-199.926	-152.315	-404.513	-304.498	-361.261	-210.533	-253.264	-261.385	-150.315	-312.336	-496.913	-301.635	-167.594	-243.665
51.246	104.347	-178.059	-199.26	-299.106	-160.945	-365.179	-173.682	-415.017	-241.979	-271.822	-280.37	-231.879	-286.455	-531.868	-350.08	-218.238	-238.522
14.106	72.666	-252.933	-103.445	-140.164	-91.615	-320.547	-247.241	-281.562	-160.91	-183.816	-190.041	-172.687	-234.718	-485.938	-305.015	-111.31	-173.45
16.924	74.337	-265.283	-113.238	-149.11	-102.13	-337.081	-259.723	-297.08	-171.817	-195.717	-202.041	-184.28	-246.536	-485.785	-317.405	-120.649	-185.105
28.46	81.901	-301.741	-124.253	-153.7	-116.007	-361.377	-297.191	-316.343	-186.504	-216.851	-223.844	-205.727	-258.691	-458.331	-323.76	-128.645	-205.391
31.012	82.238	-336.738	-160.869	-188.835	-151.381	-397.254	-328.7	-366.118	-225.244	-251.35	-257.664	-234.355	-280.927	-448.8	-352.709	-164.85	-235.645
40.797	101.278	-82.974	-384.918	-362.414	-226.202	-349.218	-91.453	-349.954	-386.377	-396.145	-399.333	-260.315	100.96	-486.124	-154.564	-394.677	-80.278
38.932	97.38	-152.325	-145.054	-224.668	-97.669	-248.267	-147.895	-276.447	-171.104	-184.76	-190.028	-149.503	-207.913	-442.883	-255.44	-157.751	-155.186
58.82	108.462	-230.066	-170.481	-237.814	-142.672	-350.437	-223.712	-381.789	-209.45	-237.558	-244.319	-140.672	-260.662	-578.525	-395.901	-181.512	-210.96
38.522	98.731	-124.957	-192.581	-297.877	-124.929	-263.333	-118.779	-321.974	-222.508	-231.197	-236.891	-171.616	-221.407	-436.926	-226.32	-207.47	-183.309
38.72	99.372	-119.241	-199.261	-305.769	-126.819	-259.754	-113.046	-319.548	-227.717	-235.207	-240.802	-171.854	-220.487	-435.526	-211.605	-213.417	-32.265
-13.811	63.795	-67.762	-167.398	-240.413	-86.986	-187.938	-62.164	-228.238	-193.489	-182.91	-185.996	-116.294	-181.408	-315.115	-110.292	-184.331	-141.326
6.381	78.225	-20.237	-321.142	-206.865	-197.888	-252.359	-22.607	-226.095	-320.622	-319.142	-319.142	-202.736	-102.599	-291.706	-49.305	-282.719	-156.57
80.363	130.152	-97.082	-335.699	-273.635	-363.427	-380.165	-113.601	-256.66	-333.699	-333.699	-333.699	-380.273	107.66	-384.811	-166.837	-13.48	-136.438
71.295	123.21	-76.874	-307.093	-237.288	-381.036	-376.35	-97.306	-228.943	-305.093	-305.093	-305.093	-389.317	102.576	-372.826	-140.733	-32.467	-149.425
42.548	100.88	-141.22	-177.422	-274.463	-118.907	-264.836	-137.126	-310.458	-203.227	-215.72	-221.142	-116.907	-224.19	-469.118	-251.437	-191.296	-24.8
57.927	109.865	-202.067	-163.335	-242.078	-131.545	-324.153	-199.661	-343.51	-194.23	-226.678	-234.209	-201.942	-266.709	-545.322	-323.917	-176.841	-0.675
57.616	108.24	-218.708	-171.241	-245.521	-143.044	-353.919	-213.277	-381.231	-210.405	-241.896	-249.571	-214.878	-272.697	-636.579	-358.334	-184.499	-217.196
42.679	100.282	-156.573	-159.532	-248.101	-110.851	-269.863	-150.962	-311.288	-190.312	-206.524	-212.733	-166.723	-222.238	-502.859	-283.814	-173.712	-173.094
39.231	98.732	-138.962	-168.092	-262.307	-110.558	-255.866	-133.299	-302.847	-196.593	-208.633	-214.459	-161.388	-215.185	-472.649	-246.275	-182.203	-169.908
52.68	110.132	-110.851	-282.167	-405.133	-177.075	-301.586	-109.133	-380.589	-301.258	-309.815	-314.923	-214.583	111.099	-491.018	-196.813	-292.474	-229.779
30.024	88.592	-172.233	-137.316	-209.695	-99.995	-276.054	-164.432	-303.643	-176.632	-190.715	-196.479	-158.69	-217.36	-455.523	-326.323	-151.411	-164.645
-8.987	66.066	-86.363	-169.198	-265.098	-93.469	-217.461	-81.668	-264.972	-203.628	-196.589	-200.923	-133.108	-203.772	-362.565	-144.582	-190.82	-154.843
-1.449	71.873	-41.81	-257.249	-254.38	-150.836	-229.794	-39.209	-256.057	-279.334	-264.795	-266.32	-168.724	-217.201	-259.252	-83.515	-261.374	-204.365
66.781	121.04	-71.865	-505.567	-281.472	-329.299	-403.308	-76.553	-276.979	-503.567	-503.567	-503.567	-341.827	102.446	-488.075	-123.789	-86.651	-141.015
87.664	136.388	-97.24	-449.672	-289.247	-363.264	-390.467	-100.541	-272.308	-447.672	-447.672	-447.672	-366.777	107.339	-451.695	-149.321	17.341	-184.059
26.891	92.685	-54.304	-396.008	-300.122	-207.805	-300.887	-55.847	-308.436	-415.774	-395.022	-396.068	-228.255	-62.596	-388.285	-99.085	-346.179	-103.74
23.249	87.842	-111.059	-179.569	-277.336	-109.321	-239.226	-106.218	-288.719	-208.45	-210.506	-215.217	-151.171	-209.663	-404.397	-192.884	-195.26	-165.621
42.556	98.309	-172.152	-148.967	-224.125	-108.525	-275.087	-166.774	-301.797	-179.462	-194.16	-199.252	-161.227	-219.798	-451.281	-318.138	-161.557	-166.242
64.055	112.821	-234.813	-166.327	-232.606	-145.154	-360.836	-233.009	-354.249	-199.538	-239.744	-247.633	-223.555	-293.439	-519.872	-284.834	-178.266	-223.181
56.594	107.967	-213.683	-162.643	-236.552	-136.003	-342.463	-209.399	-359.023	-200.484	-234.819	-243.021	-212.882	-278.616	-561.996	-325.703	-176.425	-214.16
62.66	111.037	-238.734	-179.777	-246.484	-160.329	-388.884	-234.366	-385.734	-220.545	-261.997	-270.748	-158.329	-310.391	-544.823	-283.779	-192.995	-244.674
40.366	102.169	-95.579	-275.447	-371.663	-162.151	-277.467	-93.292	-352.393	-296.785	-297.344	-302.271	-199.05	-33.474	-469.804	-160.118	-284.194	-217.525
-24.31	59.84	-30.863	-217.26	-221.997	-115.818	-185.185	-26.147	-218.578	-231.912	-216.955	-218.236	-131.485	-193.525	-273.371	-54.174	-219.849	-169.534
-4.914	71.258	-65.018	-206.865	-273.041	-109.643	-206.754	-61.038	-253.942	-231.259	-219.344	-222.505	-137.762	-202.135	-348.771	-106.32	-219.753	-165.276
81.216	131.332	-95.759	-375.678	-291.424	-343.903	-392.913	-105.122	-275.366	-373.678	-373.678	-373.678	-367.75	108.505	-410.935	-154.39	-21.052	-132.098
66.051	119.762	-88.243	-345.671	-308.535	-271.433	-364.876	-97.924	-300.716	-338.35	-350.683	-352.055	-319.496	-23.994	-385.78	-146.288	-196.635	-70.921
28.217	92.308	-104.275	-206.336	-310.853	-124.103	-247.581	-100.286	-303.591	-232.558	-233.857	-238.545	-163.304	-220.084	-423.733	-178.817	-220.44	-179.368
47.493	102.297	-183.847	-164.597	-251.174	-127.003	-314.976	-180.108	-349.216	-200.526	-225.955	-233.34	-194.473	-259.881	-585.727	-331.398	-180.343	-198.694
45.349	102.634	-153.331	-181.045	-285.13	-127.355	-289.334	-149.731	-341.712	-211.827	-231.117	-238.009	-185.413	-243.813	-542.2	-281.603	-239.872	-20.159
57.206	108.728	-200.847	-180.315	-265.634	-148.961	-354.04	-198.894	-376.918	-215.233	-249.202	-257.201	-222.233	-291.693	-562.997	-328.668	-196.378	-224.975
42.414	103.432	-100.824	-235.88	-321.088	-141.403	-247.685	-95.888	-303.354	-252.29	-254.369	-258.347	-173.735	103.715	-420.734	-169.162	-240.501	-38.034
70.866	124.787	-97.726	-359.578	-331.205	-215.095	-288.633	-91.467	-320.8	-360.525	-359.79	-361.311	-232.948	-52.57	-420.321	-155.999	-107.604	-106.425
86.72	136.461	-116.194	-346.452	-335.703	-215.975	-280.172	-105.472	-324.185	-350.105	-347.54	-349.26	-232.484	-44.729	-402.753	-180.533	-38.898	-105.17
-20.481	58.343	-11.866	-324.518	-206.926	-192.328	-255.297	-19.002	-230.178	-324.164	-322.518	-322.518	-200.311	-105.878	-281.856	-45.938	-290.679	-264.079
-98.696	11.151	-19.259	-169.502	-208.392	-79.9	-160.358	-16.743	-193.511	-196.546	-174.596	-176.423	-99.531	-189.529	-246.106	-41.454	-197.92	-151.576
-32.586	52.843	-16.114	-284.516	-211.416	-155.129	-220.792	-18.773	-228.403	-292.269	-281.965	-281.707	-164.327	-119.516	-290.81	-43.057	-266.632	-223.872
-29.917	53.527	-41.045	-212.655	-245.066	-113.545	-197.728	-38.439	-233.074	-235.047	-218.389	-219.832	-131.031	-201.993	-264.661	-77.02	-226.525	-170.385
-1.78	70.571	-15.614	-362.878	-202.534	-242.432	-304.253	-28.665	-227.137	-360.878	-360.878	-360.878	-248.664	-104.742	-330.271	-55.62	-301.425	-161.888
-83.851	18.608	-37.906	-158.908	-229.469	-74.867	-174.357	-34.963	-212.237	-194.26	-172.98	-175.808	-103.65	-192.959	-272.813	-68.631	-192.301	-132.074
-14.469	65.3	-31.215	-285.691	-240.586	-153.523	-226.568	-31.216	-250.574	-298.74	-283.217	-283.736	-166.612	-94.954	-307.372	-62.198	-274.079	-214
-4.011	71.993	-28.46	-316.795	-231.737	-175.059	-242.931	-29.398	-247.605	-323.978	-314.795	-314.546	-185.217	-99.545	-314.821	-58.866	-255.34	-143.132
-6.593	69.969	-22.597	-305.199	-217.354	-174.143	-235.9	-23.364	-234.21	-309.507	-303.199	-303.199	-181.808	-104.474	-295.551	-50.663	-246.93	-107.33
-12.252	67.441	-32.906	-261.618	-233.126	-141.731	-209.973	-30.499	-238.707	-273.032	-259	-259.608	-154.459	-93.988	-302.985	-60.15	-252.217	-127.652
12.85	82.992	-23.645	-349.051	-208.75	-220.665	-276.596	-28.42	-229.192	-347.051	-347.051	-347.051	-225.717	-118.347	-333.039	-53.551	-246.019	-79.22
47.272	98.472	-239.772	-150.364	-207.126	-133.546	-359.545	-236.007	-340.975	-194.121	-226.822	-234.151	-131.546	-293.255	-495.374	-296.696	-162.165	-214.286
49.609	98.542	-269.462	-170.705	-217.779	-161.224	-397.772	-263.092	-352.029	-219.425	-257.597	-265.266	-159.224	-329.086	-447.607	-276.096	-181.157	-249.439
62.311	107.823	-326.276	-162.092	-197.125	-155.692	-405.677	-318.906	-358.346	-213.378	-259.134	-267.645	-153.692	-312.837	-471.261	-297.119	-167.68	-250.394
57.269	104.81	-279.956	-159.519	-205.196	-149.413	-388.785	-274.378	-349.527	-204.816	-244.502	-252.186	-147.413	-309.775	-478.388	-292.769	-168.353	-235.241
59.135	105.963	-300.423	-160.959	-201.828	-152.853	-398.163	-293.582	-354.223	-210.153	-255.132	-263.653	-150.853	-317.797	-469.342	-290.009	-168.547	-246.478
29.72	85.039	-240.998	-128.963	-178.752	-113.889	-341.51	-235.989	-316.081	-179.766	-207.848	-214.867	-196.229	-269.681	-488.977	-302.857	-139.718	-196.696
25.12	81.481	-236.298	-134.63	-186.419	-118.142	-346.937	-230.824	-324.558	-185.402	-209.521	-215.926	-195.673	-270.144	-499.707	-315.855	-146.31	-197.371
19.636	77.64	-234.081	-124.721	-174.585	-108.127	-333.715	-228.422	-311.935	-177.127	-199.891	-206.264	-185.733	-257.855	-501.506	-317.442	-136.178	-187.724
13.669	74.572	-205.84	-123.603	-183.3	-102.544	-318.581	-201.929	-304.956	-174.308	-196.038	-202.82	-181.145	-262.272	-479.665	-296.078	-138.32	-183.797
8.039	70.172	-206.954	-113.133	-166.666	-91.452	-300.512	-200.176	-290.786	-164.078	-179.851	-185.559	-161.545	-229.672	-465.891	-318.215	-126.53	-165.632
-14.507	65.597	-41.156	-215.102	-230.849	-113.402	-187.29	-37.018	-221.93	-229.19	-215.239	-216.537	-128.404	-191.048	-293.494	-70.373	-217.166	-163.65
58.685	115.199	-54.64	-372.165	-225.577	-339.526	-380.795	-63.366	-229.953	-370.165	-370.166	-370.165	-339.72	90.873	-425.396	-96.457	-53.017	-212.395
51.92	110.451	-52.478	-418.141	-239.607	-303.695	-362.738	-59.675	-246.706	-416.141	-416.141	-416.141	-309.394	91.376	-424.123	-94.472	-104.97	-177.867
56.934	114.021	-60.293	-437.336	-251.633	-317.777	-379.988	-67.45	-254.588	-435.336	-435.336	-435.336	-324.72	93.601	-455.133	-105.849	-87.661	-9.887
112.206	154.695	-179.468	-346.386	-447.175	-256.773	-341.71	-176.003	-422.501	-346.133	-376.547	-382.457	-295.84	129.137	-455.513	-300.861	39.316	-72.79
55.916	113.552	-92.382	-363.548	-360.766	-209.731	-309.207	-91.649	-345.912	-371.327	-371.814	-375.066	-237.97	102.168	-476.396	-155.116	-241.153	-86.984
50.781	105.219	-172.587	-183.125	-281.733	-140.815	-324.748	-171.833	-359.569	-214.133	-240.954	-248.238	-206.337	-276.973	-536.2	-305.772	-200.774	-211.171
51.714	105.798	-175.296	-182.705	-279.912	-141.581	-327.284	-174.576	-360.276	-213.652	-241.319	-248.643	-207.732	-278.474	-536.389	-309.361	-200.156	-212.268
58.129	107.036	-230.976	-191.294	-262.651	-169.803	-406.284	-227.665	-407.656	-234.261	-271.207	-279.4	-167.803	-317.332	-572.016	-294.651	-206.176	-251.629
49.764	104.277	-159.505	-217.966	-345.055	-167.533	-361.799	-158.788	-430.053	-256.417	-283.357	-291.601	-165.533	-296.206	-594.792	-310.839	-240.651	-241.657
33.61	95.962	-112.538	-183.046	-274.218	-111.336	-232.336	-106.342	-282.02	-206.878	-211.198	-215.88	-151.449	-200.716	-406.53	-191.362	-194.483	-36.666
61.979	110.152	-260.67	-137.033	-187.22	-120.864	-338.758	-254.447	-320.873	-173.977	-209.074	-216.08	-118.864	-261.554	-547.722	-312.594	-145.134	-195.773
9.454	80.499	-66.938	-207.716	-262.779	-114.371	-205.297	-61.682	-246.676	-226.498	-216.558	-218.923	-137.016	-191.954	-320.032	-111.187	-214.793	-161.408
16.495	88.546	-83.748	-262.964	-356.57	-165.647	-193.062	-79.532	-344.192	-355.566	-336.222	-311.291	-192.314	77.406	-279.252	-118.908	-291.587	-94.741
-5.503	71.382	-33.948	-430.894	-242.456	-246.724	-268.636	-46.025	-280.092	-521.167	-522.686	-428.894	-290.723	-113.692	-314.879	-70.191	-315.676	-184.517
79.151	130.588	-143.541	-429.161	-486.857	-303.018	-228.966	-141.189	-466.25	-529.889	-539.7	-513.478	-329.509	95.596	-258.864	-195.778	5.311	-155.564
49.881	110.609	-97.4	-498.368	-381.764	-287.017	-224.498	-100.077	-407.599	-624.159	-617.701	-566.945	-313.246	78.108	-258.373	-133.797	-78.427	-171.32
-13.742	68.463	-47.213	-230.684	-255.266	-136.264	-173.924	-42.098	-251.009	-299.289	-284.961	-244.264	-160.687	-203.62	-264.354	-70.401	-238.305	-110.048
11.13	81.801	-132.432	-159.361	-273.775	-121.199	-192.344	-127.723	-349.171	-237.013	-228.013	-241.992	-152.134	-229.562	-326.381	-207.168	-239.746	-184.948
30.398	97.512	-92.432	-318.276	-434.576	-213.047	-215.922	-91.36	-436.415	-435.615	-418.176	-404.509	-241.242	82.548	-284.677	-135.07	-340.45	-99.074
39.303	103.875	-107.207	-303.642	-448.495	-205.946	-201.115	-104.281	-433.915	-405.481	-393.574	-386.856	-230.682	82.065	-272.142	-149.358	-241.141	-103.808
27.185	95.474	-102.146	-272.914	-439.712	-187.408	-200.887	-99.77	-423.468	-375.138	-360.047	-360.302	-213.423	82.095	-283.563	-146.449	-332.296	-86.718
7.045	82.403	-73.841	-315.205	-382.143	-191.458	-203.042	-74.228	-390.094	-430.456	-403.968	-373.97	-218.499	-72.885	-276.684	-107.541	-346.185	-117.119
38.055	96.481	-211.809	-142.174	-223.624	-141.522	-257.485	-209.173	-404.233	-221.252	-230.098	-256.471	-134.242	-283.571	-404.645	-351.64	-259.067	-218.148
-3.931	63.191	-180.47	-105.865	-160.161	-93.989	-231.176	-171.667	-271.281	-174.19	-170.875	-174.45	-137.387	-196.026	-315.696	-332.61	-177.274	-150.024
6.499	80.238	-103.754	-198.108	-329.605	-134.045	-188.177	-100.35	-339.855	-280.812	-265.975	-263.441	-161.648	-229.681	-307.329	-156.103	-257.04	-193.174
8.83	79.53	-145.041	-140.245	-243.683	-110.142	-190.751	-140.365	-335.42	-213.532	-206.627	-225.532	-142.427	-228.8	-336.411	-226.408	-225.61	-176.754
36.879	94.013	-247.7	-115.261	-175.907	-121.741	-256.382	-242.825	-354.426	-188.794	-199.81	-226.974	-176.57	-266.442	-414.835	-338.396	-227.947	-199.283
32.33	89.561	-237.172	-148.397	-215.254	-155.106	-304.31	-232.22	-441.188	-239.328	-249.646	-269.783	-219.334	-294.627	-443.546	-371.747	-273.251	-234.854
37.281	93.234	-256.357	-130.656	-189.97	-139.214	-287.875	-250.486	-392.807	-212.562	-224.373	-246.583	-200.595	-280.478	-440.486	-362.896	-248.478	-217.476
21.763	89.48	-143.203	-165.671	-284.565	-129.606	-192.007	-140.014	-362.112	-241.179	-235.727	-253.303	-159.926	-239.206	-320.406	-220.713	-249.163	-41.21
22.164	89.575	-145.698	-163.088	-280.114	-128.982	-193.931	-142.545	-362.691	-238.543	-233.555	-251.633	-160.035	-240.347	-324.223	-225.799	-248.167	-40.324
47.572	104.975	-214.028	-143.46	-228.906	-142.743	-235.851	-211.812	-398.105	-216.411	-227.408	-260.278	-188.297	-275.768	-373.349	-347.085	-259.654	-8.802
53.09	107.001	-234.173	-152.881	-228.265	-164.52	-279.057	-233.462	-406.436	-232.984	-250.898	-283.458	-223.44	-318.384	-393.332	-320.134	-286.932	-247.882
37.035	97.356	-194.195	-144.916	-236.546	-137.043	-234.871	-190.631	-400.532	-221.806	-227.45	-255.48	-182.037	-266.795	-377.797	-333.424	-255.663	-210.377
3.805	80.469	-70.926	-259.382	-323.683	-161.827	-181.212	-66.948	-315.572	-349.87	-329.428	-295.638	-185.761	-68.365	-258.375	-100.213	-279.691	-73.234
0.257	76.077	-104.799	-166.694	-272.912	-109.388	-162.878	-99.554	-289.95	-236.077	-222.243	-223.095	-131.782	-203.137	-292.882	-150.719	-218.938	-166.002
43.324	97.795	-273.098	-116.624	-169.881	-130.045	-272.139	-269.344	-356.913	-191.9	-207.267	-235.298	-121.993	-282.94	-410.253	-321.312	-236.181	-211.123
18.267	86.664	-137.846	-140.138	-232.897	-102.071	-170.885	-132.058	-291.124	-202.91	-195.979	-206.609	-128.036	-199.915	-318.146	-205.818	-203.51	-158.491
-53.283	17.927	30.574	-163.535	-78.597	-262.739	-217.099	-28.549	-114.448	-188.641	-188.641	-161.535	-334.651	-172.257	-238.012	-38.37	-132.927	-283.447
53.861	112.984	-90.577	-586.371	-347.415	-321.155	-255.407	-95.862	-365.912	-716.253	-718.558	-613.516	-354.778	82.512	-287.668	-130.269	-67.929	-175.427
-55.409	15.76	27.963	-165.597	-80.58	-257.973	-221.356	-33.25	-116.456	-194.74	-194.74	-163.597	-321.382	15.36	-232.828	-44.905	-151.969	-261.118
43.808	106.791	-102.114	-371.353	-440.497	-235.835	-215.023	-101.857	-459.923	-484.712	-472.938	-453.879	-262.871	80.633	-272.515	-142.601	-160.982	-128.802
47.425	109.368	-111.059	-340.295	-468.681	-227.51	-207.096	-109.023	-471.671	-447.084	-436.769	-429.91	-252.183	82.829	-266.821	-152.618	-159.328	-118.67
52.984	112.761	-97.878	-502.365	-374.556	-290.375	-227.634	-99.98	-398.229	-629.154	-619.913	-561.422	-317.617	79.779	-260.919	-133.094	-67.814	-173.168
23.011	93.068	-74.047	-369.213	-352.082	-216.484	-208.99	-73.508	-379.682	-487.153	-463.452	-408.454	-244.909	70.935	-268.835	-103.766	-236.632	-141.229
-135.197	-12.24	-31.592	-239.165	-318.392	-119.361	-242.759	-40.861	-295.234	-285.353	-254.363	-256.89	-146.922	-294.896	-327.291	-82.257	-296.133	-215.715
-37.678	47.396	-44.209	-227.784	-280.179	-122.361	-221.88	-43.825	-264.541	-258.556	-237.472	-239.38	-143.822	-226.669	-290.117	-88.152	-250.446	-185.899
-125.601	-5.253	-11.51	-219.957	-228.979	-108.682	-192.828	-15.011	-224.289	-244.629	-220.947	-221.895	-123.701	-237.642	-254.26	-42.337	-247.949	-194.89
-35.1	45.117	-4.069	-367.202	-182.46	-255.078	-331.034	-27.694	-213.909	-365.202	-365.202	-365.202	-262.427	59.722	-372.732	-51.437	-262.962	-391.52
-78.796	11.34	17.92	-287.374	-149.352	-203.537	-256.109	-8.376	-183.747	-285.374	-285.374	-285.374	-206.706	-175.71	-273.692	-26.483	-252.939	-223.317
50.225	101.478	-138.858	-225.818	-290.049	-221.272	-318.515	-171.848	-282.879	-227.289	-262.302	-265.907	-292.061	-429.871	-323.096	-243.265	-258.866	-13.95
-64.039	26.522	-91.688	-161.251	-281.381	-94.174	-253.921	-93.871	-298.23	-209.245	-200.258	-204.991	-143.426	-251.692	-403.483	-174.909	-197.112	-170.676
-25.899	52.378	-53.907	-336.182	-326.749	-184.513	-325.37	-72.116	-337.966	-350.381	-350.56	-353.799	-222.76	-356.48	-443.116	-120.909	-363.667	-265.747
-62.258	29.457	-25.193	-390.267	-273.489	-186.927	-306.282	-43.074	-300.976	-419.738	-388.661	-389.78	-212.451	-367.155	-390.849	-77.649	-394.214	-293.682
-100.82	5.232	-77.657	-206.084	-376.408	-155.087	-263.87	-105.699	-372.324	-269.847	-293.141	-301.904	-217.263	-402.399	-362.177	-162.319	-321.072	-251.899
-37.573	42.434	-105.357	-202.936	-341.263	-176.995	-281.788	-132.753	-356.403	-249.269	-297.349	-305.887	-245.511	-417.659	-358.962	-203.763	-326.715	-264.309
-223.7	-55.954	-37.076	-143.97	-252.002	-68.156	-161.202	-43.46	-227.637	-205.564	-171.889	-175.424	-99.5	-237.938	-288.318	-72.381	-220.376	-171.138
18.33	70.627	-387.19	-172.597	-201.347	-181.763	-428.825	-387.944	-405.994	-236.555	-268.918	-274.182	-164.317	-331.334	-498.752	-374.638	-275.932	-256.925
-72.258	17.378	-44.365	-263.37	-251.197	-227.063	-274.415	-88.761	-283.359	-273.501	-301.478	-302.565	-285.607	-407.357	-299.169	-125.198	-330.119	-314.285
-69.547	20.36	-79.372	-223.054	-335.958	-197.358	-301.316	-114.344	-342.759	-271.126	-313.951	-321.391	-273.055	-468.163	-347.004	-177.05	-348.493	-297.923
-192.151	-34.501	-55.371	-183.897	-365.561	-108.824	-225.381	-68.202	-343.25	-277.421	-242.054	-248.212	-153.03	-326.036	-363.435	-114.02	-292.924	-218.515
-209.07	-46.579	-25.031	-255.595	-308.656	-139.882	-228.024	-52.957	-331.589	-327.469	-294.414	-299.12	-175.564	-358.253	-329.312	-80.082	-337.474	-258.844
-156.409	-21.646	-45.674	-236.305	-369.817	-145.388	-245.94	-71.411	-366.974	-315.342	-299.131	-306.086	-191.863	-376.32	-353.195	-108.707	-335.594	-253.619
-166.04	-29.429	-31.797	-254.765	-301.456	-158.61	-246.521	-65.05	-340.184	-319.404	-307.115	-312.478	-202.388	-372.844	-317.505	-94.657	-336.408	-270.597
-364.238	-126.002	11.728	-240.203	-228.381	-120.496	-189.236	-13.413	-253.266	-295.671	-250.631	-252.594	-140.043	-359.403	-262.902	-28.419	-332.488	-299.473
-37.306	40.052	-116.577	-189.018	-293.433	-182.843	-299.847	-149.565	-314.273	-232.614	-281.623	-289.072	-262.733	-449.878	-343.748	-231.203	-314.756	-271.5
-189.127	-36.562	-27.466	-260.839	-324.207	-146.351	-235.349	-55.242	-349.237	-340.541	-307.596	-313.103	-184.972	-375.797	-333.712	-82.687	-351.965	-266.989
-162.532	-30.74	-20.896	-277.607	-262.393	-168.772	-241.73	-57.848	-310.204	-320.966	-310.813	-314.418	-205.286	-359.851	-299.388	-82.71	-332.633	-280.809
-159.86	-61.414	36.076	-242.641	-120.448	-185.507	-205.454	-7.083	-167.577	-240.641	-240.641	-240.641	-187.73	-237.207	-226.141	-18.212	-220.007	-322.522
-207.524	-54.446	-0.468	-301.368	-221.158	-165.049	-219.981	-36.34	-275.72	-340.481	-312.779	-314.319	-186.284	-357.33	-282.985	-55.079	-341.67	-306.022
-218.07	-43.117	-35.056	-192.457	-317.79	-98.251	-183.76	-47.291	-284.761	-268.664	-228.169	-232.989	-131.931	-290.522	-324.571	-74.859	-277.61	-207.901
-174.993	-67.888	32.472	-255.415	-135.055	-177.44	-211.707	-12.097	-179.461	-247.666	-253.415	-253.415	-183.527	-206.946	-225.627	-26.169	-232.831	-308.383
-111.178	-19.274	14.662	-251.413	-139.154	-219.081	-250.307	-34.254	-180.37	-249.413	-249.413	-249.413	-226.498	-153.799	-260.952	-54.663	-248.207	-300.447
-111.221	-19.781	14.527	-239.004	-136.643	-215.599	-239.466	-36.907	-177.871	-237.004	-237.004	-237.004	-224.892	-147.734	-246.523	-56.48	-236.724	-284.261
-137.862	-127.327	58.898	-146.918	-87.824	-105.19	-121.251	33.03	-112.35	-143.145	-144.918	-144.918	-103.828	-199.827	-137.952	28.276	-137.184	-189.985
-80.332	-119.574	10.576	-87.353	-138.386	-25.985	-72.665	11.798	-118.501	-122.814	-96.501	-99.204	-44.73	-174.545	-191.113	5.248	-163.353	-100.787
-111.259	-18.886	12.546	-247.357	-140.536	-217.505	-245.67	-37.518	-182.549	-245.357	-245.357	-245.357	-226.458	-151.443	-256.4	-57.99	-246.803	-291.983
-114.193	-32.356	33.943	-204.849	-102.951	-204.833	-212.856	-21.221	-143.968	-202.849	-202.849	-202.849	-204.347	-174.596	-218.935	-36.072	-197.164	-258.84
-158.983	-139.167	23.006	-136.306	-161.968	-60.418	-112.564	14.455	-150.164	-165.406	-139.426	-140.964	-75.721	-221.189	-183.292	6.676	-200.275	-155.969
-127.96	-39.728	33.212	-219.022	-114.845	-206.779	-212.718	-22.382	-157.781	-217.022	-217.022	-217.022	-204.971	-164.501	-218.518	-35.588	-208.991	-269.754
-126.115	-31.484	13.934	-228.718	-139.187	-197.925	-215.019	-42.417	-177.884	-226.718	-226.718	-226.718	-213.725	-245.122	-218.075	-58.866	-224.956	-256.705
-143.175	-72.743	51.386	-187.622	-91.837	-163.54	-173.972	3.674	-132.517	-185.622	-185.622	-185.622	-162.421	-221.96	-183.949	47.606	-170.292	-256.29
-167.654	-169.63	24.64	-155.845	-172.47	-73.302	-127.803	12.998	-164.054	-182.105	-156.561	-157.476	-84.657	-259.165	-196.005	3.499	-221.283	-174.867
-218.159	-62.553	-31.406	-137.988	-253.57	-94.904	-191.288	-51.907	-268.22	-254.281	-217.76	-224.721	-156.007	-278.676	-238.884	-80.843	-267.358	-229.831
-340.166	-100.99	4.504	-223.628	-238.178	-110.107	-183.412	-13.45	-243.705	-276.971	-233.429	-235.342	-130.076	-319.488	-264.045	-30.451	-311.125	-267.714
-184.06	-102.998	-14.559	-125.19	-211.419	-58.651	-150.709	-17.947	-188.86	-173.55	-143.548	-145.339	-81.022	-234.318	-209.837	-46.153	-217.905	-161.511
-188.343	-149.379	45.918	-186.763	-128.156	-110.861	-147.455	12.146	-155.576	-187.085	-179.478	-178.928	-117.5	-250.092	-173.607	4.933	-190.091	-220.804
-102.46	-5.831	-168.071	-83.308	-147.434	-74.4	-263.748	-171.047	-289.6	-179.382	-175.007	-181.841	-155.015	-292.414	-431.022	-269.18	-199.724	-174.45
-352.78	-166.061	16.679	-289.097	-237.924	-150.175	-227.282	-20.171	-290.624	-357.185	-304.265	-305.736	-175.255	-421.425	-285.619	-37.492	-400.752	-393.587
-197.42	-85.622	33.157	-261.141	-141.861	-172.876	-208.635	-12.496	-188.084	-259.141	-259.141	-259.141	-180.724	-283.136	-228.18	-25.177	-241.826	-312.905
-32.77	-62.07	-4.852	-51.077	-108.103	1.803	-56.325	0.735	-95.532	-88.811	-64.604	-68.363	-24.909	-134.165	-218.808	-9.11	-129.625	-66.945

## Sheet: RR
Data For LDM
JAKY1	LOGL2	LOGI2	LOGN2	VANH2	VANZ2	FRED3	LOGI3	MLOG3	ONLG3	ORLG3	SHCA3	VANZ3	ANDE4	FRED4	GOMP4	LOGI4	VANG4
0.9675	0.93372	0.97778	0.99677	0.99897	0.99295	0.99822	0.97894	0.99861	0.9971	0.99726	0.99737	0.99454	0.99755	0.99951	0.99051	0.99734	0.99459
0.9587	0.922	0.98215	0.9961	0.999	0.99247	0.9983	0.98286	0.99871	0.99664	0.99695	0.99712	0.99448	0.99723	0.9997	0.99347	0.99677	0.96132
0.9851	0.96121	0.95868	0.99813	0.99639	0.99363	0.99809	0.96386	0.99728	0.9982	0.99811	0.99814	0.99476	0.99876	0.99888	0.97659	0.99845	0.99639
0.956	0.91633	0.98862	0.9933	0.99748	0.99088	0.99815	0.98896	0.9981	0.99431	0.99492	0.99523	0.99332	0.99694	0.99955	0.99685	0.99429	0.993
0.9617	0.9255	0.98394	0.99446	0.99803	0.99116	0.99772	0.98448	0.99785	0.99502	0.99535	0.99557	0.99321	0.99671	0.99925	0.99426	0.99529	0.99291
0.9468	0.90492	0.99212	0.99283	0.9968	0.99155	0.99847	0.99253	0.99802	0.99403	0.99484	0.99516	0.99414	0.99753	0.99937	0.99757	0.99397	0.99385
0.9583	0.91948	0.98614	0.99465	0.99753	0.99368	0.99825	0.9878	0.9975	0.99543	0.99589	0.9961	0.99586	0.99887	0.99855	0.99447	0.99601	0.99573
0.9527	0.90544	0.99188	0.9971	0.9988	0.99625	0.99947	0.9922	0.99926	0.99791	0.99831	0.99845	0.99734	0.99863	0.99956	0.9974	0.99758	0.99773
0.9381	0.89136	0.99748	0.99657	0.99804	0.9963	0.99968	0.99741	0.99944	0.99726	0.99779	0.99796	0.99626	0.99861	0.99981	0.9981	0.9969	0.99738
0.9277	0.8853	0.99905	0.99794	0.99854	0.99782	0.99974	0.99905	0.99959	0.99836	0.99867	0.99877	0.99779	0.99858	0.99976	0.99815	0.99805	0.99841
0.976	0.94322	0.97205	0.99699	0.99903	0.99158	0.99771	0.9729	0.99864	0.99743	0.99741	0.99752	0.99292	0.99663	0.99932	0.98644	0.99741	0.99396
0.9881	0.95736	0.9601	0.99015	0.99535	0.97883	0.992	0.96005	0.99435	0.99186	0.99056	0.99083	0.98106	0.99213	0.99708	0.97487	0.9923	0.98641
0.9863	0.95224	0.97389	0.98732	0.99545	0.978	0.99519	0.9738	0.99626	0.99104	0.98997	0.99047	0.98362	0.99492	0.99873	0.98798	0.9923	0.98741
0.9889	0.95774	0.95758	0.98709	0.99384	0.97383	0.99027	0.95696	0.99284	0.98975	0.98777	0.98813	0.97709	0.99105	0.99599	0.97253	0.99036	0.98437
0.9727	0.94779	0.94557	0.99925	0.99309	0.9954	0.99829	0.95138	0.99486	0.99924	0.99924	0.99924	0.99585	0.97935	0.99915	0.96421	0.99844	0.98258
0.979	0.96117	0.93015	0.99813	0.98877	0.99412	0.9973	0.93867	0.99214	0.99811	0.99811	0.99811	0.99434	0.98565	0.99791	0.95144	0.9969	0.99855
0.9611	0.93137	0.94656	0.99898	0.99232	0.99672	0.9987	0.95257	0.99405	0.99897	0.99897	0.99897	0.99705	0.97736	0.99922	0.96505	0.99734	0.98986
0.9913	0.97033	0.94041	0.99391	0.99371	0.9824	0.99184	0.94082	0.99374	0.99432	0.99364	0.99371	0.98329	0.9932	0.99612	0.95551	0.9941	0.99001
0.9891	0.95665	0.96618	0.99356	0.99781	0.98475	0.99553	0.96689	0.99695	0.99455	0.9941	0.99431	0.98715	0.99564	0.99853	0.98155	0.99505	0.99043
0.9656	0.92775	0.98377	0.99427	0.99828	0.99072	0.99797	0.9846	0.99838	0.99504	0.99556	0.99581	0.99315	0.99702	0.99965	0.99456	0.99518	0.99296
0.963	0.92094	0.99048	0.98798	0.99365	0.9864	0.99736	0.99087	0.99659	0.98959	0.99107	0.9916	0.99014	0.99596	0.99934	0.99645	0.98918	0.98966
0.9366	0.88959	0.99754	0.99367	0.99562	0.9936	0.99933	0.99756	0.99879	0.99509	0.99596	0.99627	0.99353	0.99778	0.99975	0.9983	0.99389	0.99548
0.9266	0.88232	0.99902	0.99754	0.99819	0.99747	0.99968	0.99898	0.99947	0.99819	0.99856	0.99869	0.99744	0.99859	0.99971	0.99806	0.99764	0.99833
0.9301	0.88515	0.99886	0.99699	0.99787	0.99686	0.99975	0.99878	0.99953	0.99768	0.99811	0.99826	0.99682	0.99853	0.99981	0.9984	0.99711	0.99779
0.9429	0.90417	0.98979	0.99572	0.99768	0.99598	0.99836	0.99094	0.9975	0.99598	0.99669	0.99683	0.99742	0.99944	0.99843	0.99576	0.99701	0.95031
0.963	0.9291	0.97605	0.99805	0.99906	0.99483	0.99888	0.97783	0.9989	0.9983	0.99844	0.99852	0.99634	0.99851	0.99974	0.98931	0.99857	0.96712
0.9642	0.92136	0.98637	0.99476	0.99864	0.99191	0.99866	0.98681	0.99911	0.99588	0.99633	0.99659	0.99412	0.99753	0.9999	0.99667	0.99574	0.99417
0.9701	0.93018	0.98522	0.99391	0.99763	0.99245	0.99827	0.98684	0.99776	0.99463	0.99536	0.99561	0.99477	0.99866	0.99884	0.99529	0.99527	0.99453
0.9698	0.93017	0.98364	0.99423	0.99837	0.99085	0.99818	0.98437	0.99851	0.99522	0.99565	0.99589	0.99337	0.9975	0.99968	0.99465	0.99536	0.99334
0.9691	0.93086	0.98303	0.99484	0.99835	0.99222	0.99836	0.98437	0.99826	0.99564	0.99603	0.99626	0.99443	0.99817	0.9993	0.99394	0.99599	0.99435
0.9959	0.9766	0.93725	0.99044	0.99404	0.97391	0.98964	0.93728	0.99269	0.99222	0.99043	0.99062	0.97616	0.99412	0.99553	0.95299	0.99366	0.98957
0.9521	0.91829	0.99752	0.99266	0.9949	0.99199	0.99918	0.99749	0.99855	0.99385	0.9942	0.99449	0.9919	0.99689	0.99979	0.99905	0.99476	0.99352
0.9646	0.93609	0.99598	0.9901	0.99313	0.98965	0.99869	0.99589	0.99729	0.9919	0.99246	0.99286	0.98953	0.99744	0.99944	0.99716	0.99105	0.99214
0.9681	0.93677	0.99396	0.98968	0.99372	0.9887	0.99844	0.99399	0.99735	0.99136	0.99192	0.99232	0.99118	0.99721	0.99952	0.9961	0.991	0.99124
0.9582	0.93104	0.99813	0.99561	0.9971	0.99532	0.99963	0.9981	0.99921	0.99648	0.99665	0.99682	0.99628	0.99874	0.99978	0.99874	0.99627	0.9964
0.9581	0.92836	0.99729	0.99498	0.99677	0.99472	0.99953	0.99736	0.99901	0.99579	0.9962	0.9964	0.99593	0.99881	0.99977	0.9986	0.99559	0.99594
0.9683	0.93275	0.99232	0.98891	0.99366	0.98707	0.99803	0.99225	0.99729	0.99077	0.9912	0.99167	0.98976	0.99618	0.9996	0.99741	0.99037	0.99002
0.9924	0.96635	0.95315	0.99594	0.99733	0.98593	0.99524	0.9551	0.99705	0.99698	0.99611	0.99622	0.98765	0.99655	0.99829	0.96965	0.99706	0.99295
0.9871	0.95278	0.97269	0.99344	0.99841	0.98649	0.99711	0.97409	0.99805	0.99489	0.99481	0.99509	0.98986	0.99744	0.99947	0.98725	0.99527	0.99198
0.9806	0.94303	0.97941	0.99473	0.99874	0.99071	0.99856	0.98048	0.99875	0.99596	0.99642	0.99667	0.99382	0.99865	0.99957	0.99198	0.9962	0.99479
0.9906	0.98403	0.9317	0.99278	0.98754	0.98941	0.99326	0.95324	0.99111	0.99291	0.99284	0.99285	0.99082	0.99242	0.99326	0.96393	0.99306	0.99457
0.948	0.90398	0.99641	0.99475	0.99673	0.99304	0.99844	0.99635	0.99882	0.99525	0.99515	0.99532	0.99297	0.99572	0.9989	0.99977	0.99529	0.99365
0.9384	0.89409	0.99809	0.99683	0.99812	0.99605	0.99945	0.99805	0.99963	0.99743	0.9975	0.99761	0.996	0.99747	0.99961	0.99945	0.99723	0.9966
0.9417	0.89208	0.99637	0.99456	0.99693	0.99414	0.9994	0.9963	0.99925	0.99593	0.99664	0.99689	0.99592	0.99784	0.99988	0.99875	0.99509	0.99587
0.9836	0.94758	0.97705	0.99518	0.99906	0.99079	0.99853	0.97859	0.99891	0.99641	0.99663	0.99684	0.99361	0.99877	0.99971	0.99075	0.99667	0.99474
0.9829	0.96637	0.93076	0.99826	0.9905	0.99255	0.99647	0.93655	0.99324	0.99824	0.99824	0.99824	0.99261	0.98639	0.99768	0.95016	0.9971	0.9976
0.9814	0.94807	0.98576	0.99165	0.99685	0.98782	0.99812	0.98574	0.9986	0.99424	0.99387	0.99416	0.9905	0.99741	0.99936	0.99734	0.99405	0.99227
0.9731	0.94308	0.99344	0.99244	0.99609	0.99074	0.99892	0.99347	0.99868	0.9937	0.99384	0.99409	0.99238	0.99788	0.9997	0.99835	0.99384	0.99281
0.973	0.9372	0.98657	0.99168	0.99649	0.98945	0.99761	0.98773	0.99735	0.99267	0.99363	0.99394	0.99196	0.99676	0.99839	0.99747	0.99315	0.99211
0.9564	0.91169	0.99372	0.9932	0.99667	0.99228	0.99911	0.99392	0.99897	0.99468	0.99544	0.99575	0.99445	0.99788	0.99991	0.99871	0.99416	0.99444
0.9927	0.96849	0.95248	0.99817	0.99671	0.99133	0.99749	0.95827	0.99759	0.99843	0.99815	0.99819	0.9926	0.99897	0.99878	0.97157	0.99867	0.99655
0.9799	0.94683	0.97268	0.99648	0.99797	0.99403	0.99828	0.97671	0.99796	0.9968	0.99688	0.99699	0.99576	0.99905	0.9987	0.98723	0.99753	0.99602
0.9651	0.9284	0.98325	0.99558	0.99779	0.99467	0.9981	0.98557	0.99753	0.99578	0.9962	0.99633	0.99601	0.9989	0.99833	0.99406	0.99683	0.99595
0.94	0.89039	0.9953	0.99515	0.99778	0.99452	0.99942	0.99544	0.99928	0.99623	0.99676	0.99698	0.99446	0.99814	0.99994	0.99874	0.99588	0.99592
0.9337	0.88249	0.99692	0.99601	0.99786	0.99575	0.99966	0.99697	0.99943	0.997	0.99743	0.99764	0.99571	0.99858	0.99994	0.99858	0.99654	0.99696
0.9504	0.90364	0.99293	0.99584	0.99843	0.99527	0.99945	0.99339	0.99923	0.99666	0.99724	0.99743	0.99678	0.99896	0.99981	0.99834	0.99673	0.9966
0.9434	0.90335	0.99106	-229.329	0.99828	0.99554	0.99892	0.99187	0.9983	0.99641	0.99704	0.99721	0.99713	0.99922	0.99909	0.99706	0.99702	0.95027
0.9579	0.91532	0.98935	0.99532	0.99835	0.99432	0.99892	0.99029	0.99864	0.99599	0.99662	0.99681	0.99599	0.99873	0.99938	0.99754	0.99644	0.99583
0.9442	0.89622	0.99461	0.99435	0.99741	0.99381	0.99919	0.9948	0.99893	0.99548	0.99617	0.99642	0.99374	0.99821	0.99979	0.99844	0.99529	0.99542
0.9219	0.8739	0.99894	0.9976	0.99836	0.99764	0.99976	0.99894	0.99937	0.99823	0.99851	0.99863	0.99762	0.99911	0.99979	0.99777	0.99786	0.99844
0.9834	0.959	0.95721	0.9988	0.99698	0.99332	0.99804	0.96037	0.99759	0.99884	0.99876	0.99877	0.99421	0.99834	0.99916	0.97413	0.99873	0.9963
0.977	0.94547	0.97351	0.99656	0.9987	0.99188	0.9978	0.97485	0.9983	0.99682	0.99689	0.997	0.99345	0.99736	0.9993	0.98724	0.99708	0.99394
0.9801	0.95411	0.96175	0.99875	0.99724	0.9942	0.99843	0.96467	0.99773	0.99886	0.99878	0.9988	0.99526	0.9986	0.99934	0.9781	0.99889	0.99662
0.9712	0.94711	0.94862	0.99869	0.9922	0.99621	0.9984	0.95471	0.99406	0.99867	0.99867	0.99867	0.99641	0.97691	0.99875	0.96767	0.99819	0.98184
0.9885	0.9569	0.96656	0.99773	0.99911	0.9925	0.99868	0.96972	0.99914	0.9985	0.9985	0.99861	0.99467	0.99939	0.99952	0.98266	0.99875	0.99693
0.9742	0.9534	0.93447	0.99853	0.99026	0.99527	0.9978	0.94124	0.99293	0.99852	0.99852	0.99852	0.99529	0.98367	0.99835	0.95449	0.99696	0.99851
0.9823	0.95868	0.95533	0.99826	0.99608	0.99281	0.99745	0.95804	0.99672	0.99821	0.99816	0.99817	0.99343	0.97642	0.99879	0.97164	0.99796	0.99537
0.9676	0.93456	0.97909	0.99603	0.99811	0.99377	0.99819	0.98126	0.9979	0.99641	0.99665	0.99679	0.99564	0.99861	0.9987	0.99113	0.9971	0.99563
0.9521	0.91457	0.98749	0.99527	0.99764	0.99483	0.99821	0.9889	0.99746	0.99564	0.99624	0.9964	0.99656	0.99907	0.99838	0.99537	0.99659	0.95743
0.9578	0.92294	0.98301	0.99574	0.99813	0.99387	0.99818	0.98454	0.99784	0.99604	0.99643	0.99658	0.99565	0.92974	0.99867	0.99361	0.99682	0.96192
0.9767	0.93498	0.97958	0.98914	0.99539	0.98242	0.99552	0.97941	0.99665	0.99145	0.99095	0.99137	0.98563	0.99366	0.99868	0.9923	0.99133	0.98762
0.9737	0.9365	0.98875	0.99119	0.99611	0.98852	0.99823	0.989	0.99814	0.99308	0.9933	0.99364	0.99123	0.99718	0.99958	0.99766	0.99294	0.9918
0.9484	0.90289	0.99595	0.99361	0.99622	0.9926	0.99917	0.99596	0.99907	0.99512	0.99549	0.99578	0.99252	0.99704	0.99975	0.99924	0.99436	0.9945
0.96	0.91381	0.98906	0.99439	0.99815	0.99224	0.99884	0.98945	0.99914	0.99559	0.99619	0.99646	0.99441	0.99763	0.99987	0.99787	0.99532	0.99439
0.9722	0.9387	0.97608	0.99635	0.99691	0.99585	0.99816	0.98014	0.99702	0.99645	0.99674	0.99682	0.99716	0.99934	0.99822	0.98925	0.99749	0.99725
0.9711	0.9368	0.97827	0.99655	0.99882	0.99381	0.99864	0.98048	0.99862	0.99707	0.99727	0.9974	0.99574	0.99878	0.99933	0.99085	0.9975	0.99575
0.9869	0.95273	0.97778	0.99438	0.99896	0.98937	0.99842	0.97824	0.99919	0.9968	0.99633	0.99657	0.99225	0.99834	0.99941	0.99199	0.9975	0.99469
0.9655	0.94238	0.9974	0.99866	0.99925	0.99815	0.99963	0.9975	0.99965	0.99896	0.99897	0.99902	0.99835	0.99861	0.99965	0.99722	0.99895	0.99853
0.9708	0.94851	0.99754	0.99767	0.99888	0.99662	0.99945	0.99765	0.99979	0.99795	0.99794	0.998	0.99659	0.99852	0.99947	0.99851	0.9982	0.99732
0.964	0.94284	0.99834	0.99845	0.99922	0.99814	0.99981	0.99847	0.9997	0.9987	0.99875	0.99881	0.99838	0.99904	0.99982	0.99741	0.99879	0.99847
0.9546	0.91056	0.99181	0.99481	0.99747	0.99477	0.99884	0.99271	0.99803	0.99562	0.99632	0.99653	0.99472	0.99936	0.99903	0.99622	0.99589	0.9964
0.9229	0.87323	0.99853	0.9973	0.99816	0.99741	0.99962	0.99852	0.9991	0.99801	0.99834	0.99848	0.99738	0.99924	0.99965	0.99732	0.99763	0.99839
0.936	0.88525	0.99661	0.99386	0.99634	0.99371	0.99928	0.99672	0.99869	0.99528	0.99599	0.99629	0.99364	0.99834	0.9997	0.99788	0.99452	0.99561
0.9309	0.88	0.99737	0.99657	0.99797	0.99658	0.99963	0.99736	0.99914	0.99742	0.99783	0.99801	0.99654	0.99911	0.99974	0.99745	0.99706	0.99772
0.9716	0.94162	0.97176	0.99793	0.99802	0.99495	0.99857	0.97437	0.99812	0.99808	0.99811	0.99817	0.99616	0.99874	0.99919	0.98642	0.9985	0.9745
0.9826	0.95228	0.96875	0.99705	0.99881	0.99159	0.99809	0.97113	0.99862	0.99751	0.99757	0.99768	0.9936	0.99815	0.99949	0.9838	0.99774	0.9947
0.9898	0.96005	0.96598	0.9909	0.99636	0.98118	0.99451	0.96689	0.99541	0.99196	0.99167	0.99199	0.98449	0.99466	0.99838	0.97988	0.99277	0.98779
0.9932	0.97133	0.95083	0.99752	0.99568	0.9901	0.99698	0.95634	0.99696	0.9978	0.99756	0.99761	0.99152	0.99843	0.99861	0.96997	0.99802	0.99554
0.9702	0.9389	0.97399	0.99734	0.99854	0.99382	0.99833	0.97605	0.99841	0.99756	0.99764	0.99773	0.99534	0.99821	0.99932	0.98778	0.99793	0.97231
0.9738	0.94593	0.96778	0.99777	0.99686	0.99526	0.99835	0.9715	0.99743	0.99775	0.99784	0.99788	0.99631	0.99887	0.99872	0.98326	0.99827	0.99688
0.9779	0.94763	0.96912	0.99854	0.99885	0.99446	0.99877	0.97159	0.99888	0.99871	0.99872	0.99877	0.99555	0.99867	0.9996	0.98454	0.99887	0.99635
0.9647	0.92534	0.98433	0.99594	0.99919	0.99322	0.99891	0.98522	0.99923	0.99678	0.99723	0.99742	0.99533	0.99826	0.9999	0.99524	0.99687	0.99535
0.9607	0.91902	0.98689	0.99587	0.9991	0.99362	0.99908	0.98757	0.99939	0.99682	0.99727	0.99748	0.99557	0.99822	0.99995	0.99686	0.99673	0.99553
0.9323	0.89127	0.99907	0.99662	0.9976	0.99633	0.99973	0.99902	0.99956	0.99723	0.99751	0.99767	0.99629	0.99805	0.99982	0.99914	0.99682	0.99703
0.9559	0.90766	0.99245	0.99397	0.99712	0.99205	0.99867	0.9925	0.99909	0.99554	0.99566	0.99588	0.99353	0.99644	0.99946	0.9996	0.99495	0.99394
0.9508	0.90388	0.9926	0.99465	0.99794	0.99334	0.99915	0.99276	0.99921	0.99578	0.99642	0.99668	0.99522	0.99778	0.99994	0.99898	0.99547	0.99509
0.9209	0.87385	0.99914	0.99717	0.99794	0.99725	0.99975	0.99911	0.99936	0.99792	0.99823	0.99837	0.99722	0.99897	0.99979	0.99819	0.99738	0.99812
0.9198	0.87298	0.99926	0.99701	0.99788	0.99703	0.99981	0.99926	0.99944	0.99767	0.99803	0.99818	0.99699	0.99878	0.99987	0.99856	0.99723	0.99785
0.9166	0.87312	0.99936	0.99754	0.99813	0.99762	0.99973	0.99935	0.99938	0.9981	0.99841	0.99853	0.9976	0.99892	0.99976	0.99837	0.99768	0.99832
0.9188	0.87537	0.99941	0.99744	0.99815	0.99749	0.99981	0.9994	0.99947	0.99791	0.99825	0.99837	0.99746	0.99886	0.99984	0.99853	0.9976	0.99811
0.9766	0.94121	0.97677	0.99508	0.99856	0.98985	0.99731	0.97762	0.99813	0.99549	0.99572	0.9959	0.99166	0.99646	0.9994	0.98996	0.9957	0.9921
0.9611	0.91854	0.98771	0.99215	0.99694	0.98888	0.99767	0.98771	0.99808	0.99328	0.99395	0.99432	0.99138	0.99569	0.9997	0.99675	0.99303	0.99116
0.9634	0.92	0.98756	0.994	0.99802	0.99151	0.99842	0.98825	0.99866	0.99484	0.99548	0.99574	0.99368	0.99748	0.99975	0.99713	0.99498	0.99348
0.9499	0.90143	0.993	0.99404	0.99742	0.99273	0.99905	0.99322	0.99906	0.99527	0.99592	0.99621	0.99478	0.99768	0.99991	0.99867	0.99483	0.9946
0.9778	0.94845	0.9671	0.99789	0.99849	0.99243	0.99788	0.96865	0.99838	0.99806	0.99804	0.9981	0.99375	0.9974	0.99941	0.98216	0.99806	0.99484
0.9669	0.93598	0.95677	0.99958	0.99615	0.99491	0.99838	0.96009	0.99688	0.99957	0.99957	0.99957	0.99566	0.9729	0.99952	0.97294	0.99904	0.98344
0.9703	0.94474	0.94992	0.99941	0.99414	0.99646	0.99891	0.95487	0.99549	0.99941	0.99941	0.99941	0.99683	0.9781	0.99946	0.96802	0.99872	0.98116
0.9847	0.96153	0.95353	0.99892	0.99657	0.99293	0.99784	0.9566	0.99724	0.99894	0.99887	0.99888	0.99376	0.99822	0.99902	0.97064	0.99868	0.99635
0.9593	0.91663	0.98891	0.99468	0.99805	0.99346	0.99877	0.98996	0.99845	0.99543	0.99606	0.99629	0.9954	0.99861	0.99935	0.99715	0.9958	0.99514
0.9556	0.90893	0.99211	0.99368	0.99733	0.99246	0.99896	0.99249	0.99884	0.99476	0.99557	0.99587	0.99463	0.99808	0.99983	0.99838	0.9946	0.99442
0.984	0.95633	0.9617	0.99825	0.99826	0.99179	0.99769	0.96411	0.99827	0.99847	0.99837	0.99843	0.993	0.99782	0.99922	0.97794	0.99838	0.99514
0.9735	0.94297	0.96731	0.99833	0.99845	0.99315	0.99818	0.96909	0.99841	0.99843	0.99847	0.99852	0.99444	0.99761	0.99963	0.98205	0.99837	0.99527
0.9694	0.93814	0.97402	0.99758	0.99849	0.99441	0.99851	0.97624	0.99842	0.99777	0.99782	0.9979	0.9958	0.99846	0.99929	0.98785	0.99817	0.99598
0.97	0.94625	0.9503	0.99845	0.99188	0.99689	0.99867	0.95656	0.99364	0.99844	0.99844	0.99844	0.99704	0.9776	0.99906	0.96936	0.99815	0.98738
0.9854	0.96605	0.94295	0.99852	0.9939	0.99205	0.99681	0.94677	0.99532	0.99851	0.99851	0.99851	0.9923	0.98289	0.99839	0.9605	0.99783	0.99613
0.9796	0.95002	0.97053	0.99538	0.99767	0.98969	0.99653	0.97151	0.99711	0.99538	0.99551	0.99564	0.99115	0.9959	0.99874	0.98376	0.99567	0.99173
0.9736	0.94252	0.9735	0.99632	0.99831	0.99161	0.9975	0.97472	0.99789	0.99648	0.99658	0.99669	0.99321	0.99689	0.99914	0.98676	0.99675	0.99352
0.9685	0.93447	0.97984	0.99539	0.99844	0.99183	0.99797	0.98109	0.99809	0.99592	0.9962	0.99638	0.99396	0.99754	0.99925	0.99167	0.99629	0.99386
0.9754	0.94549	0.97192	0.99634	0.99754	0.99329	0.99783	0.97523	0.99757	0.99665	0.99671	0.99681	0.9951	0.99842	0.9984	0.98592	0.99727	0.99544
0.9701	0.9363	0.97793	0.99625	0.99883	0.99279	0.99835	0.97977	0.99853	0.99678	0.99702	0.99717	0.99482	0.99812	0.99942	0.99047	0.99711	0.99478
0.9867	0.95612	0.96763	0.99562	0.99814	0.98947	0.99693	0.96995	0.99761	0.99585	0.99586	0.99599	0.9913	0.99716	0.99884	0.98339	0.99634	0.99269
0.9463	0.90019	0.99587	0.9897	0.99324	0.98904	0.99853	0.99574	0.99771	0.99158	0.99262	0.99311	0.99175	0.99582	0.99982	0.9961	0.99025	0.99161
0.9316	0.8898	0.99895	0.99562	0.9968	0.99543	0.99967	0.99894	0.99928	0.99638	0.99681	0.99702	0.99636	0.99785	0.99984	0.99907	0.99582	0.99637
0.9273	0.88662	0.9993	0.9968	0.99758	0.99663	0.99975	0.99928	0.99951	0.99737	0.99771	0.99786	0.9966	0.99821	0.99982	0.99899	0.9969	0.99736
0.923	0.88295	0.99956	0.99821	0.99872	0.99801	0.99979	0.99954	0.99975	0.99851	0.99867	0.99876	0.99799	0.9984	0.9998	0.99881	0.99832	0.99836
0.9806	0.949	0.97038	0.99437	0.9978	0.98734	0.99576	0.97082	0.99703	0.99463	0.99472	0.99489	0.9888	0.99467	0.99885	0.984	0.99477	0.99008
0.9761	0.94019	0.97836	0.99185	0.99675	0.986	0.9958	0.97852	0.99652	0.99215	0.99259	0.99291	0.98815	0.99429	0.99902	0.98979	0.9925	0.98832
0.9402	0.88976	0.99597	0.99419	0.99683	0.99383	0.99935	0.9961	0.99902	0.99551	0.99625	0.99653	0.99376	0.99815	0.99986	0.9972	0.99477	0.99559
0.922	0.8785	0.99927	0.99698	0.99773	0.99702	0.99973	0.99926	0.99938	0.99754	0.99797	0.99812	0.99698	0.99864	0.99979	0.99848	0.99707	0.99778
0.9234	0.88184	0.99934	0.99718	0.99789	0.99713	0.99972	0.99933	0.99948	0.99782	0.99821	0.99834	0.99799	0.99852	0.99977	0.99854	0.99732	0.99798
0.9828	0.95707	0.96169	0.99805	0.99693	0.99341	0.99787	0.96522	0.99753	0.99814	0.99803	0.99806	0.99433	0.99827	0.99891	0.9783	0.99828	0.9958
0.9688	0.93344	0.98085	0.99597	0.99869	0.99329	0.99846	0.98253	0.99843	0.99648	0.99673	0.99689	0.99514	0.9984	0.99926	0.99261	0.99694	0.99505
0.9709	0.93985	0.97426	0.99697	0.99834	0.99341	0.99807	0.97621	0.99812	0.99714	0.9972	0.99729	0.99486	0.99793	0.99904	0.98794	0.99756	0.99501
0.9824	0.96073	0.94573	0.99884	0.99455	0.99262	0.99722	0.94905	0.99573	0.99881	0.99882	0.99882	0.99299	0.98095	0.99875	0.96283	0.99809	0.99614
0.9706	0.94115	0.96334	0.9993	0.99756	0.99512	0.99877	0.96621	0.99787	0.99934	0.99932	0.99934	0.99617	0.99861	0.99972	0.97912	0.99928	0.97605
0.9616	0.92482	0.98402	0.99609	0.99895	0.9936	0.9987	0.98504	0.99876	0.9967	0.99699	0.99716	0.99538	0.99822	0.99955	0.99473	0.99702	0.99526
0.9571	0.92159	0.97647	0.99797	0.99873	0.99482	0.9987	0.97812	0.99854	0.9981	0.99822	0.9983	0.99623	0.9302	0.99959	0.98936	0.9984	0.96687
0.9769	0.95071	0.95892	0.99945	0.997	0.99508	0.99877	0.96237	0.99758	0.9995	0.99946	0.99947	0.99604	0.97239	0.99956	0.97573	0.99937	0.99754
0.9658	0.9298	0.98117	0.99679	0.99946	0.99378	0.99896	0.98242	0.99927	0.99748	0.9978	0.99796	0.99582	0.99854	0.99987	0.99315	0.99766	0.9959
0.9577	0.91973	0.98638	0.99602	0.99898	0.99406	0.99898	0.98721	0.99894	0.99679	0.99722	0.99739	0.99595	0.99851	0.99963	0.99619	0.99706	0.99591
0.9799	0.94488	0.97554	0.99603	0.99856	0.99253	0.99816	0.97801	0.99826	0.99636	0.99654	0.99669	0.99429	0.99842	0.99909	0.98947	0.99721	0.99451
0.9495	0.90093	0.99326	0.9934	0.99701	0.99207	0.99888	0.9934	0.99881	0.99458	0.99536	0.99567	0.99429	0.99743	0.99987	0.99851	0.99415	0.99403
0.959	0.91963	0.98692	0.99579	0.99884	0.99408	0.99905	0.98787	0.99889	0.99662	0.99711	0.9973	0.99614	0.99882	0.99963	0.99628	0.99689	0.99604
0.9541	0.91515	0.98785	0.99621	0.99878	0.99512	0.99909	0.98888	0.99873	0.99688	0.99732	0.99749	0.99677	0.99907	0.99942	0.99644	0.99731	0.99669
0.9523	0.90765	0.99142	0.99566	0.99856	0.99481	0.99933	0.99192	0.99915	0.99658	0.99716	0.99735	0.99646	0.99876	0.99978	0.99826	0.99666	0.99631
0.9379	0.88736	0.99685	0.99598	0.99792	0.99549	0.99964	0.99681	0.99954	0.99688	0.99738	0.99757	0.99544	0.99834	0.99996	0.99881	0.9965	0.9967
0.963	0.92468	0.985	0.9965	0.99904	0.99506	0.9991	0.98633	0.99892	0.99705	0.99757	0.99771	0.99669	0.99904	0.99944	0.99568	0.99758	0.99667
0.9643	0.92556	0.9856	0.99412	0.99789	0.99146	0.998	0.98632	0.99799	0.99474	0.99514	0.99539	0.99344	0.99728	0.99927	0.99539	0.99507	0.99311
0.9475	0.8989	0.99363	0.99486	0.99789	0.99386	0.9992	0.99378	0.9992	0.99588	0.99643	0.99667	0.99547	0.99791	0.99991	0.99869	0.99567	0.99523
0.9391	0.8903	0.99487	0.99602	0.99812	0.99571	0.99945	0.99507	0.999	0.99697	0.99739	0.99758	0.99567	0.99901	0.99965	0.9974	0.99677	0.99707
0.9826	0.95553	0.96385	0.9982	0.99791	0.99312	0.99822	0.96672	0.99821	0.99836	0.99831	0.99836	0.99444	0.99843	0.99934	0.97987	0.99852	0.99577
0.9777	0.94935	0.96675	0.99834	0.99808	0.99394	0.9985	0.96943	0.99829	0.99845	0.99845	0.9985	0.99526	0.99853	0.99948	0.98219	0.99865	0.99608
0.9746	0.94402	0.97282	0.99712	0.99843	0.99361	0.99826	0.97538	0.9983	0.99739	0.99742	0.99752	0.99519	0.99839	0.99913	0.987	0.9979	0.99546
0.9871	0.97435	0.92805	0.99448	0.98435	0.99194	0.9947	0.94287	0.98956	0.99442	0.99442	0.99442	0.99263	0.99527	0.99456	0.95481	0.99428	0.99623
0.9827	0.95823	0.96055	0.99824	0.99636	0.99439	0.99836	0.96548	0.99718	0.99827	0.99829	0.99832	0.99553	0.99902	0.999	0.97815	0.99861	0.99683
0.9742	0.94191	0.97341	0.99705	0.99899	0.99233	0.99814	0.97504	0.99873	0.99742	0.99755	0.99767	0.9941	0.99768	0.99958	0.98714	0.99755	0.99452
0.9543	0.90578	0.99224	0.99272	0.99662	0.99097	0.9986	0.99239	0.99878	0.99417	0.99501	0.99534	0.99341	0.99684	0.99975	0.99873	0.99357	0.99349
0.9457	0.89655	0.99527	0.99507	0.9975	0.99435	0.99942	0.99533	0.99937	0.99621	0.99687	0.99711	0.99429	0.99805	0.99987	0.99821	0.99559	0.99604
0.9507	0.90332	0.99333	0.99444	0.99761	0.99392	0.99924	0.99365	0.99894	0.99558	0.99636	0.99662	0.99592	0.99864	0.99977	0.99798	0.9954	0.99564
0.96	0.91565	0.98988	0.99358	0.9975	0.99211	0.99865	0.99054	0.99845	0.99448	0.99529	0.99557	0.99428	0.99805	0.99958	0.99765	0.99461	0.994
0.9904	0.95951	0.97193	0.99317	0.9985	0.98628	0.99749	0.97305	0.99822	0.99542	0.99496	0.99523	0.99	0.99796	0.99928	0.98734	0.99581	0.99292
0.983	0.94688	0.97935	0.99432	0.99855	0.98998	0.99809	0.98011	0.99857	0.99584	0.99567	0.99586	0.99235	0.99783	0.99924	0.99305	0.99614	0.99369
0.9658	0.93242	0.97842	0.99711	0.99845	0.99532	0.99876	0.9809	0.99836	0.99739	0.99757	0.99767	0.99683	0.99919	0.99907	0.99076	0.99806	0.99688
0.9548	0.91622	0.9871	0.99526	0.99723	0.99552	0.99797	0.98914	0.99699	0.99545	0.99607	0.99621	0.99683	0.99936	0.99802	0.99491	0.99665	0.9968
0.9593	0.91967	0.98649	0.99525	0.9972	0.99553	0.99799	0.98868	0.99703	0.99544	0.99621	0.99635	0.99707	0.99938	0.99802	0.99445	0.99664	0.99703
0.9246	0.8824	0.99942	0.99755	0.99835	0.99738	0.99986	0.9994	0.99971	0.99807	0.99834	0.99846	0.99735	0.99854	0.99989	0.99882	0.99779	0.99803
0.9273	0.8909	0.9996	0.99776	0.99849	0.99747	0.99976	0.99958	0.99978	0.99822	0.99832	0.99842	0.99744	0.99823	0.99977	0.99911	0.99804	0.99797
0.9297	0.89087	0.99937	0.99793	0.99865	0.99763	0.99981	0.99935	0.99976	0.99838	0.99857	0.99866	0.99761	0.9985	0.99982	0.99868	0.99815	0.99821
0.9399	0.90488	0.99895	0.99665	0.99779	0.99576	0.99915	0.99895	0.99945	0.99692	0.99686	0.99695	0.99572	0.99697	0.99928	0.99976	0.99702	0.99604
0.9425	0.91435	0.99925	0.99573	0.99699	0.99521	0.99943	0.99924	0.99926	0.99598	0.99602	0.99615	0.99542	0.99719	0.99958	0.99988	0.99618	0.9955
0.9742	0.94821	0.98565	0.9943	0.99546	0.99521	0.99663	0.9893	0.99521	0.99429	0.99477	0.99486	0.99515	0.9986	0.9966	0.99496	0.99581	0.99572
0.9524	0.9043	0.99412	0.99407	0.99687	0.99238	0.99883	0.99408	0.99911	0.99545	0.9956	0.99585	0.99378	0.99655	0.99955	0.9996	0.99482	0.99413
0.9275	0.88724	0.99924	0.99795	0.99845	0.99773	0.99964	0.99923	0.99962	0.99846	0.99858	0.99868	0.9977	0.99817	0.99966	0.99854	0.99809	0.99821
0.9305	0.89471	0.99933	0.99828	0.9987	0.99806	0.99968	0.99929	0.99962	0.99872	0.99887	0.99895	0.99804	0.99846	0.9997	0.99821	0.99839	0.99857
0.9308	0.89921	0.99965	0.99787	0.99853	0.99745	0.99958	0.99964	0.9997	0.99821	0.9982	0.99828	0.99742	0.99788	0.9996	0.99932	0.99811	0.99774
0.9334	0.90128	0.99953	0.99801	0.99867	0.99744	0.99945	0.99952	0.99971	0.9983	0.99825	0.99831	0.99741	0.99776	0.99947	0.99924	0.99834	0.99771
0.9666	0.92806	0.98155	0.9974	0.99971	0.99477	0.9993	0.98266	0.99965	0.99822	0.99849	0.99862	0.99654	0.99876	0.99989	0.99351	0.99823	0.99689
0.9689	0.93191	0.98096	0.99676	0.99956	0.9936	0.99896	0.98197	0.99937	0.9976	0.99782	0.99798	0.99551	0.99836	0.99989	0.99325	0.99765	0.99572
0.9616	0.91718	0.988	0.99533	0.99872	0.99336	0.99907	0.98848	0.99923	0.99646	0.99689	0.99712	0.9953	0.99819	0.99986	0.99717	0.99623	0.99523
0.9443	0.89482	0.99458	0.99562	0.99816	0.99471	0.99938	0.99464	0.99941	0.99652	0.99695	0.99715	0.99465	0.99797	0.99992	0.9989	0.99631	0.99581
0.9656	0.92385	0.98703	0.99381	0.99764	0.99226	0.99837	0.98828	0.99802	0.99451	0.99523	0.99548	0.99436	0.9983	0.99913	0.99625	0.99498	0.99407
0.9386	0.88873	0.99667	0.99509	0.99717	0.99483	0.99954	0.99674	0.99926	0.99629	0.99697	0.99722	0.99478	0.99833	0.99986	0.99832	0.99551	0.99643
0.9496	0.90014	0.99359	0.99366	0.99705	0.99231	0.999	0.99372	0.99906	0.9949	0.99557	0.99588	0.99423	0.99719	0.99991	0.99899	0.99442	0.99413
0.9642	0.92617	0.98429	0.9948	0.99667	0.99512	0.9975	0.98706	0.99642	0.99495	0.99551	0.99564	0.99635	0.99914	0.99753	0.99367	0.99625	0.99631
0.9695	0.93835	0.97482	0.99715	0.99826	0.99445	0.99835	0.97743	0.99814	0.99732	0.9974	0.99749	0.99585	0.99858	0.99892	0.98848	0.9979	0.99596
0.9863	0.9631	0.95447	0.99855	0.99668	0.99232	0.99765	0.95748	0.99731	0.99864	0.99851	0.99853	0.99323	0.99812	0.99897	0.97143	0.99848	0.99594
0.9678	0.93138	0.98212	0.99483	0.99847	0.99123	0.99799	0.98302	0.99829	0.99544	0.99585	0.99607	0.99337	0.99719	0.99955	0.99343	0.99567	0.9932
0.9761	0.94683	0.96328	0.99849	0.99801	0.99275	0.99784	0.96503	0.99809	0.99857	0.99852	0.99855	0.99376	0.99721	0.99942	0.97868	0.99833	0.99514
0.991	0.96768	0.9504	0.99795	0.9968	0.98978	0.99659	0.95397	0.99742	0.99855	0.9979	0.99795	0.99098	0.99798	0.99858	0.96804	0.99849	0.99573
0.9923	0.96304	0.96217	0.99546	0.99845	0.98702	0.9968	0.96502	0.9979	0.99615	0.99595	0.99613	0.98939	0.9976	0.99909	0.97886	0.99662	0.99275
0.9906	0.96363	0.95348	0.98381	0.99285	0.96706	0.98858	0.95257	0.99144	0.9873	0.98477	0.98521	0.97173	0.99109	0.99583	0.96861	0.98909	0.983
0.977	0.945	0.97211	0.99797	0.99925	0.99377	0.99868	0.97376	0.99907	0.99841	0.99838	0.99847	0.99513	0.99822	0.99957	0.98689	0.99857	0.99601
0.9616	0.92955	0.98	0.99726	0.99966	0.99392	0.99895	0.98103	0.99945	0.99798	0.99817	0.9983	0.9958	0.99818	0.9999	0.99256	0.99804	0.99611
0.9488	0.90216	0.99313	0.99388	0.99731	0.99293	0.999	0.99347	0.99869	0.99498	0.9957	0.99598	0.99498	0.99803	0.99972	0.99814	0.99479	0.9947
0.9361	0.88769	0.99567	0.99432	0.99684	0.99425	0.99907	0.99596	0.99836	0.99541	0.99612	0.99639	0.99418	0.99876	0.99936	0.99593	0.99519	0.99602
0.9583	0.92435	0.97806	0.99714	0.99826	0.99464	0.99829	0.97988	0.99804	0.99723	0.99736	0.99744	0.99588	0.93228	0.99891	0.99071	0.99781	0.9639
0.9631	0.93263	0.95745	0.99945	0.99536	0.99664	0.99886	0.96126	0.99613	0.99945	0.99945	0.99945	0.99705	0.97246	0.99948	0.97418	0.99885	0.9842
0.9615	0.92886	0.97261	0.99823	0.99787	0.99544	0.99866	0.97498	0.99779	0.99827	0.99832	0.99836	0.99649	0.93708	0.99933	0.98677	0.99864	0.97083
0.9417	0.89249	0.99435	0.99535	0.99793	0.99458	0.99942	0.99451	0.99938	0.99654	0.99726	0.9975	0.99452	0.99814	0.99986	0.99844	0.99593	0.99639
0.9419	0.89134	0.99548	0.99674	0.99849	0.99602	0.99967	0.99553	0.99971	0.99765	0.99806	0.99821	0.99597	0.99821	0.99987	0.99852	0.99832	0.99722
0.9696	0.93132	0.98194	0.99478	0.99855	0.9906	0.99777	0.98239	0.99847	0.99541	0.9957	0.99592	0.99237	0.99644	0.99958	0.99382	0.99548	0.99251
0.9722	0.93529	0.97997	0.99576	0.99905	0.99157	0.99809	0.98061	0.99878	0.99641	0.99659	0.99675	0.99331	0.99707	0.99962	0.99255	0.99652	0.99363
0.975	0.94441	0.96838	0.99781	0.99876	0.99233	0.99785	0.96959	0.99857	0.99808	0.99804	0.99811	0.99357	0.9969	0.99935	0.98324	0.99795	0.99468
0.9684	0.93089	0.98346	0.99364	0.99772	0.98993	0.99741	0.9838	0.99767	0.99423	0.99458	0.99484	0.99192	0.99625	0.99928	0.99405	0.99448	0.99175
0.9686	0.9358	0.97767	0.99638	0.99854	0.99286	0.99798	0.97916	0.99816	0.99661	0.99673	0.99684	0.9944	0.99759	0.99909	0.99045	0.99704	0.99448
0.9586	0.92218	0.98525	0.99474	0.99796	0.99265	0.99809	0.9865	0.99779	0.99534	0.99573	0.99593	0.99469	0.9979	0.99885	0.9949	0.99584	0.99446
0.9504	0.9095	0.99056	0.99422	0.99754	0.9933	0.99857	0.99142	0.998	0.99511	0.99575	0.99599	0.9954	0.99849	0.99905	0.99699	0.99545	0.99523
0.9213	0.86947	0.99799	0.99593	0.99734	0.99607	0.99942	0.99806	0.99881	0.99682	0.99737	0.99758	0.99756	0.99905	0.99953	0.99786	0.99652	0.99748
0.9249	0.87357	0.99773	0.99644	0.99766	0.99659	0.99941	0.99779	0.99874	0.99727	0.99775	0.99791	0.99656	0.99925	0.99947	0.99693	0.99695	0.9979
0.9186	0.86687	0.99854	0.99708	0.99789	0.99729	0.99955	0.99855	0.99901	0.9977	0.99811	0.99825	0.99726	0.99921	0.9996	0.99751	0.99737	0.99821
0.9893	0.96166	0.95423	0.98431	0.99221	0.96849	0.98818	0.95338	0.99045	0.98636	0.98464	0.985	0.97228	0.9893	0.99542	0.9689	0.98759	0.98138
0.9872	0.96026	0.95285	0.98937	0.99347	0.97742	0.98948	0.95269	0.99214	0.99065	0.98921	0.98943	0.97858	0.98972	0.99565	0.96754	0.99093	0.98452
0.9747	0.94375	0.95696	0.99569	0.99563	0.98774	0.99427	0.95715	0.99553	0.99572	0.99552	0.99558	0.98809	0.99291	0.99768	0.97096	0.99506	0.99043
0.9617	0.92586	0.96676	0.99858	0.99809	0.993	0.99782	0.96827	0.99813	0.99886	0.99872	0.99876	0.99431	0.96267	0.99938	0.98122	0.99846	0.97341
0.9506	0.91057	0.98341	0.9962	0.99915	0.99229	0.99829	0.98381	0.99896	0.99687	0.99722	0.9974	0.99439	0.99658	0.99983	0.99442	0.99672	0.95475
0.9532	0.91399	0.98293	0.99593	0.99904	0.99192	0.99812	0.98342	0.99884	0.99662	0.99695	0.99715	0.99414	0.99655	0.9998	0.99397	0.99644	0.95664
0.9425	0.89242	0.99502	0.99347	0.99663	0.9929	0.99912	0.99512	0.99887	0.99491	0.99579	0.99611	0.99282	0.99774	0.99983	0.99785	0.99414	0.99488
0.9438	0.89718	0.99369	0.99347	0.99708	0.99256	0.99897	0.99377	0.99884	0.99499	0.99584	0.99615	0.99504	0.99761	0.99982	0.99823	0.99439	0.99473
0.937	0.8878	0.99535	0.995	0.99743	0.99468	0.99936	0.99545	0.9989	0.99632	0.99689	0.99714	0.99462	0.9986	0.99966	0.99694	0.99572	0.99643
0.9329	0.88388	0.99603	0.99511	0.99747	0.99492	0.99946	0.99616	0.99905	0.99648	0.99709	0.99733	0.99487	0.99857	0.99977	0.99689	0.99585	0.99669
0.9828	0.94857	0.96537	0.98256	0.9904	0.97032	0.98834	0.96454	0.98999	0.98358	0.98225	0.98265	0.97256	0.98688	0.99513	0.97936	0.98569	0.97783
0.9824	0.9501	0.95943	0.98257	0.98966	0.96943	0.98637	0.95859	0.9887	0.98384	0.9822	0.98256	0.97126	0.98505	0.99395	0.97391	0.98532	0.97734
0.9779	0.94979	0.95225	0.99649	0.99513	0.98866	0.99458	0.95295	0.99547	0.99647	0.9963	0.99633	0.98887	0.99398	0.99752	0.96701	0.99577	0.99182
0.971	0.93875	0.9633	0.99813	0.99788	0.9918	0.99737	0.96488	0.99796	0.99858	0.99827	0.99832	0.99308	0.9964	0.9989	0.97837	0.99815	0.99498
0.9539	0.91431	0.98003	0.99636	0.99903	0.99156	0.9978	0.98041	0.99871	0.99691	0.99716	0.99732	0.99352	0.99583	0.9997	0.99197	0.99666	0.95754
0.9523	0.91224	0.98025	0.99642	0.99905	0.99175	0.9978	0.98067	0.99875	0.99698	0.9972	0.99736	0.99364	0.9958	0.99971	0.99219	0.99671	0.95646
0.9448	0.90344	0.98737	0.99536	0.99874	0.9922	0.99836	0.98761	0.99897	0.99627	0.99668	0.99691	0.9944	0.91158	0.99987	0.99697	0.99599	0.9495
0.9389	0.88993	0.99511	0.99441	0.99724	0.9937	0.99926	0.99522	0.99908	0.99571	0.99639	0.99667	0.99363	0.99798	0.99986	0.99835	0.9951	0.99553
0.9484	0.90038	0.99282	0.99446	0.99775	0.99337	0.99916	0.99301	0.99912	0.99572	0.99643	0.99671	0.99546	0.99793	0.99986	0.99843	0.99523	0.99526
0.9448	0.89616	0.99346	0.99563	0.99795	0.99533	0.99922	0.99372	0.99871	0.99681	0.99724	0.99743	0.99528	0.99885	0.9994	0.99666	0.99642	0.9969
0.9342	0.88475	0.9959	0.99551	0.99771	0.99524	0.99949	0.99595	0.9991	0.99678	0.99733	0.99755	0.99519	0.99868	0.99976	0.99782	0.9962	0.99694
0.9886	0.96223	0.95075	0.99019	0.9939	0.97801	0.98998	0.95059	0.99261	0.99159	0.99013	0.99032	0.97943	0.99062	0.99552	0.96568	0.99184	0.98587
0.971	0.93905	0.95794	0.99747	0.99632	0.99049	0.99593	0.95889	0.99658	0.99752	0.99738	0.99741	0.99106	0.96958	0.99843	0.97262	0.99683	0.97819
0.9539	0.91488	0.98434	0.99632	0.99931	0.99306	0.99868	0.98484	0.99924	0.99713	0.9975	0.99767	0.9951	0.99724	0.99987	0.99513	0.99697	0.95734
0.9462	0.90535	0.98845	0.99595	0.99905	0.99375	0.99902	0.9888	0.99935	0.99695	0.99748	0.99769	0.99595	0.99774	0.99991	0.99727	0.99674	0.95112
0.9451	0.90234	0.99195	0.9935	0.99734	0.99174	0.99863	0.99208	0.99872	0.99486	0.99552	0.99585	0.99426	0.99698	0.99982	0.99829	0.9944	0.99389
0.9431	0.89958	0.99272	0.99369	0.99733	0.99219	0.99882	0.99292	0.99877	0.99507	0.99575	0.99605	0.99467	0.99735	0.99979	0.99827	0.99454	0.9944
0.9322	0.88121	0.99676	0.99614	0.9978	0.99613	0.99953	0.99676	0.99903	0.99718	0.99762	0.99781	0.99608	0.99897	0.99967	0.99559	0.99664	0.99743
0.9304	0.87945	0.99673	0.99618	0.99789	0.99615	0.99958	0.99687	0.99911	0.9973	0.99772	0.99791	0.99611	0.99897	0.99972	0.99741	0.9968	0.99754
0.9436	0.90123	0.98682	0.99392	0.99781	0.98989	0.99744	0.98672	0.99807	0.9947	0.99524	0.99551	0.99232	0.9101	0.9997	0.99605	0.99444	0.94761
0.9909	0.96218	0.95955	0.98809	0.99487	0.97509	0.99139	0.95951	0.9936	0.98989	0.98858	0.98888	0.9782	0.99258	0.99662	0.97519	0.99092	0.98527
0.9777	0.94146	0.97075	0.97908	0.98813	0.96765	0.98871	0.96997	0.98945	0.9812	0.9798	0.98046	0.97146	0.98565	0.99651	0.98295	0.98264	0.97536
0.975	0.94421	0.95812	0.99645	0.99625	0.98875	0.9951	0.95866	0.99626	0.99656	0.99635	0.99641	0.98934	0.99396	0.99812	0.97247	0.99594	0.99158
0.9577	0.92015	0.97895	0.99754	0.99946	0.99358	0.9986	0.97988	0.99927	0.99808	0.99826	0.99838	0.99526	0.99729	0.99975	0.99146	0.99796	0.96157
0.95	0.90957	0.98754	0.99562	0.99898	0.993	0.99886	0.98794	0.99925	0.99669	0.99721	0.99743	0.99532	0.99748	0.9999	0.99691	0.99645	0.95387
0.9499	0.90609	0.99111	0.99367	0.99753	0.99188	0.99869	0.9914	0.99882	0.99496	0.99568	0.99598	0.99433	0.99723	0.99982	0.99817	0.99453	0.99399
0.9318	0.88093	0.99758	0.99547	0.99721	0.99539	0.99958	0.99755	0.99919	0.99656	0.99713	0.99735	0.99534	0.99851	0.99983	0.995	0.99589	0.99674
0.934	0.88292	0.99653	0.99477	0.997	0.99466	0.99943	0.99663	0.99897	0.99616	0.99679	0.99705	0.9946	0.99851	0.99974	0.99622	0.99533	0.99637
0.9372	0.88756	0.99539	0.99559	0.99782	0.99534	0.99948	0.99554	0.99908	0.9968	0.99731	0.99754	0.99529	0.99874	0.99973	0.99704	0.99623	0.99687
0.9408	0.89874	0.99107	0.99427	0.99791	0.99212	0.99857	0.99121	0.99879	0.9954	0.99599	0.99628	0.99457	0.9969	0.99981	0.99816	0.99507	0.94575
0.9908	0.9634	0.95706	0.98702	0.99397	0.97302	0.99015	0.9568	0.99242	0.98862	0.98728	0.98759	0.97601	0.99145	0.99606	0.97231	0.98972	0.98389
0.988	0.96329	0.94568	0.98995	0.9925	0.97802	0.98852	0.94542	0.99126	0.99077	0.98954	0.98967	0.97844	0.98941	0.99434	0.96051	0.99096	0.98517
0.9679	0.93522	0.95739	0.99794	0.99604	0.99155	0.99637	0.95842	0.99644	0.99792	0.99783	0.99785	0.99145	0.97013	0.9985	0.97214	0.99715	0.97475
0.9684	0.93353	0.97361	0.99683	0.99889	0.99113	0.99754	0.9743	0.99861	0.99733	0.99735	0.99749	0.99277	0.99612	0.99939	0.98704	0.99708	0.99361
0.9609	0.92316	0.98179	0.99577	0.99909	0.99155	0.99821	0.98237	0.99894	0.99653	0.99694	0.99715	0.99375	0.99674	0.99974	0.99342	0.9964	0.99399
0.9592	0.92018	0.98383	0.99607	0.99924	0.9926	0.99862	0.98427	0.99929	0.99707	0.99738	0.99758	0.99462	0.99708	0.99975	0.99508	0.99682	0.9949
0.9572	0.91799	0.98522	0.99411	0.99822	0.99015	0.99782	0.98543	0.99854	0.99507	0.99559	0.99588	0.99268	0.99593	0.99975	0.99557	0.99478	0.99254
0.9418	0.89157	0.99504	0.99509	0.99764	0.99443	0.99943	0.99521	0.99933	0.99628	0.99687	0.99712	0.99437	0.99817	0.99992	0.99853	0.99568	0.99602
0.9444	0.89654	0.99313	0.99622	0.9984	0.99578	0.99946	0.99344	0.99906	0.99734	0.99779	0.99798	0.99752	0.9989	0.99964	0.99719	0.99693	0.99733
0.938	0.89476	0.99324	0.99442	0.99775	0.99306	0.999	0.9933	0.99904	0.99577	0.99638	0.99667	0.99542	0.99748	0.99987	0.9986	0.99529	0.94371
0.985	0.95109	0.96285	0.98795	0.99374	0.9768	0.99053	0.96247	0.99305	0.9895	0.98815	0.98843	0.97858	0.9901	0.99581	0.97791	0.99023	0.98034
0.9824	0.94817	0.96627	0.98523	0.99242	0.97372	0.99025	0.96571	0.99229	0.98742	0.98596	0.98636	0.97679	0.98901	0.99666	0.98008	0.98804	0.98131
0.9718	0.94018	0.96394	0.99809	0.99789	0.99214	0.99721	0.96563	0.99789	0.99836	0.99814	0.99818	0.99299	0.9964	0.99894	0.97928	0.99798	0.99461
0.9713	0.93715	0.97268	0.99683	0.99895	0.99101	0.99765	0.97365	0.99868	0.99758	0.99753	0.99766	0.99289	0.99655	0.99938	0.98649	0.99737	0.99414
0.9566	0.91784	0.98469	0.99613	0.99921	0.99315	0.99879	0.98531	0.99921	0.99694	0.99739	0.99759	0.99526	0.99769	0.99984	0.99518	0.99688	0.99524
0.9517	0.90985	0.9896	0.99447	0.99816	0.99243	0.99877	0.99	0.99891	0.99565	0.99626	0.99653	0.99481	0.99759	0.99977	0.99756	0.99535	0.99456
0.9332	0.8826	0.99626	0.9948	0.99717	0.99473	0.99939	0.99642	0.99889	0.99622	0.99683	0.99708	0.99467	0.99859	0.99968	0.99623	0.99553	0.99649
0.9336	0.8836	0.99612	0.99542	0.9975	0.99533	0.99943	0.99618	0.99891	0.99667	0.9972	0.99742	0.99528	0.99881	0.99964	0.99626	0.99606	0.99694
0.94137	0.89435	0.99345	0.99574	0.9981	0.99544	0.99933	0.99387	0.99882	0.99695	0.9974	0.99761	0.99721	0.99892	0.99952	0.99694	0.99657	0.99705
0.9435	0.90193	0.98933	0.99434	0.99812	0.99164	0.99836	0.98949	0.99868	0.99539	0.99598	0.99626	0.99408	0.90964	0.99981	0.99757	0.99516	0.94778
0.98541	0.95558	0.95858	0.98735	0.99276	0.97554	0.98884	0.958	0.99154	0.98836	0.98711	0.98737	0.97655	0.98848	0.99537	0.97294	0.98908	0.98205
0.98524	0.95614	0.95872	0.99037	0.99461	0.97951	0.99114	0.95857	0.99353	0.9916	0.9904	0.99064	0.98092	0.99068	0.99657	0.9732	0.99172	0.9855
0.96268	0.92771	0.96891	0.99877	0.99855	0.99387	0.99833	0.97061	0.99854	0.99911	0.99899	0.99904	0.99518	0.99735	0.99944	0.98338	0.99886	0.96799
0.96296	0.92036	0.98555	0.99438	0.99816	0.99067	0.99794	0.98571	0.99879	0.99547	0.99572	0.99595	0.99243	0.9959	0.99944	0.99657	0.99524	0.99286
0.96224	0.92393	0.9825	0.99529	0.99885	0.99108	0.99805	0.98284	0.99884	0.99623	0.99656	0.99677	0.99315	0.99628	0.99964	0.99411	0.99599	0.99347
0.94818	0.90779	0.988	0.99544	0.99873	0.99307	0.99876	0.98858	0.999	0.99639	0.99688	0.99711	0.99534	0.99761	0.99975	0.99683	0.99625	0.95246
0.95364	0.91206	0.98875	0.99466	0.99834	0.99235	0.99873	0.98913	0.99899	0.99575	0.99636	0.99662	0.99464	0.99744	0.9998	0.99734	0.99547	0.99444
0.94183	0.8923	0.99454	0.99471	0.99737	0.99436	0.99924	0.99467	0.99878	0.99607	0.99671	0.99696	0.9943	0.99851	0.99956	0.997	0.99545	0.99618
0.94295	0.89694	0.99281	0.99579	0.99827	0.99514	0.99934	0.99315	0.999	0.99695	0.9974	0.99761	0.997	0.99868	0.99962	0.9974	0.99657	0.99679
0.9495	0.9013	0.9922	0.99548	0.99805	0.99482	0.9992	0.99258	0.99886	0.99663	0.99719	0.9974	0.99477	0.99853	0.99944	0.99715	0.99616	0.99654
0.98046	0.94271	0.9737	0.98587	0.99289	0.97672	0.99217	0.97332	0.99356	0.98736	0.98642	0.98683	0.97922	0.9904	0.99696	0.9873	0.98844	0.98238
0.98313	0.95081	0.96501	0.98767	0.99362	0.97678	0.99082	0.96456	0.99299	0.98909	0.98796	0.98828	0.97881	0.98964	0.99681	0.97886	0.98957	0.98294
0.98039	0.94884	0.9654	0.99412	0.99716	0.9857	0.99469	0.96586	0.9965	0.99512	0.99446	0.99461	0.98722	0.99377	0.99816	0.97986	0.99486	0.98999
0.95554	0.91095	0.98934	0.99452	0.9982	0.99259	0.99888	0.98978	0.99908	0.99565	0.99642	0.99668	0.99487	0.99764	0.99979	0.99765	0.9954	0.99476
0.95501	0.90646	0.99195	0.99485	0.99794	0.99314	0.9991	0.99203	0.99939	0.99608	0.99658	0.99681	0.99484	0.99745	0.99978	0.99913	0.9956	0.99507
0.96422	0.92526	0.98192	0.99599	0.99913	0.99205	0.99842	0.98241	0.99921	0.99716	0.99727	0.99746	0.99407	0.99688	0.99956	0.994	0.99684	0.99475
0.95951	0.91808	0.98706	0.99443	0.99833	0.99153	0.99843	0.98739	0.99892	0.99546	0.99598	0.99625	0.99369	0.9969	0.9998	0.99684	0.99526	0.99357
0.94575	0.89865	0.99282	0.99475	0.99775	0.99412	0.99917	0.99309	0.99879	0.99608	0.9967	0.99694	0.99627	0.99849	0.99958	0.99741	0.99564	0.99598
0.94257	0.89687	0.9932	0.99537	0.9981	0.99459	0.9993	0.99345	0.99905	0.99653	0.99705	0.99728	0.99656	0.99852	0.99971	0.99778	0.99619	0.9963
0.94601	0.9046	0.98638	0.99474	0.99833	0.99102	0.9979	0.98647	0.99848	0.99553	0.99601	0.99626	0.9934	0.91311	0.99976	0.99598	0.99532	0.95002
0.98021	0.94291	0.96885	0.98422	0.99129	0.97357	0.98968	0.96826	0.99157	0.98575	0.98436	0.98475	0.97562	0.98779	0.99549	0.98306	0.98692	0.97989
0.98164	0.9474	0.96859	0.98858	0.9945	0.97865	0.99227	0.96836	0.99426	0.99023	0.98925	0.98958	0.98112	0.99092	0.99749	0.98242	0.99048	0.98452
0.97527	0.94308	0.96601	0.99577	0.99765	0.98808	0.99574	0.9665	0.9972	0.99628	0.99602	0.99616	0.98958	0.99442	0.99876	0.98002	0.9959	0.99134
0.95829	0.91978	0.97732	0.99596	0.99861	0.99027	0.99712	0.97762	0.9982	0.99643	0.99656	0.99671	0.99208	0.99486	0.9995	0.9898	0.99632	0.96061
0.95267	0.91238	0.98733	0.99571	0.99897	0.99331	0.99892	0.98791	0.99926	0.99672	0.99722	0.99743	0.99546	0.99769	0.99988	0.99676	0.99649	0.99533
0.95231	0.91134	0.98853	0.99513	0.99867	0.99265	0.99878	0.98875	0.99917	0.99625	0.99676	0.99699	0.99476	0.99719	0.99989	0.99756	0.99599	0.9947
0.95235	0.9082	0.99021	0.99512	0.9984	0.99355	0.99911	0.99069	0.99915	0.99628	0.99686	0.99711	0.99573	0.99817	0.9998	0.99779	0.99596	0.99552
0.94065	0.89273	0.99415	0.99537	0.99794	0.99496	0.99934	0.99439	0.99894	0.9966	0.9971	0.99732	0.9949	0.99871	0.99964	0.99747	0.99622	0.9966
0.93863	0.89472	0.99354	0.99492	0.99791	0.9941	0.99921	0.99375	0.99899	0.99619	0.99679	0.99705	0.99625	0.99825	0.99975	0.99798	0.99581	0.94502
0.95385	0.91383	0.98653	0.99582	0.99905	0.99301	0.99874	0.987	0.99927	0.99678	0.99718	0.99738	0.99294	0.99728	0.99986	0.99662	0.99655	0.99501
0.975	0.93633	0.97397	0.98025	0.98853	0.97048	0.98952	0.97319	0.98991	0.98133	0.98048	0.98104	0.97305	0.98549	0.99637	0.98598	0.98294	0.97575
0.97759	0.9399	0.9721	0.98184	0.98985	0.97151	0.9897	0.97142	0.99081	0.98334	0.98225	0.98274	0.97419	0.98681	0.99644	0.98468	0.98462	0.97757
0.98176	0.95118	0.96294	0.99417	0.997	0.98542	0.9944	0.96354	0.99629	0.99512	0.99444	0.99458	0.98685	0.99365	0.99803	0.9777	0.99486	0.98992
0.95782	0.91943	0.98168	0.99563	0.99883	0.99114	0.99778	0.98198	0.99862	0.99624	0.99654	0.99673	0.99308	0.99582	0.99966	0.99317	0.99603	0.9596
0.94903	0.90907	0.98336	0.99691	0.99946	0.99351	0.99872	0.98412	0.99932	0.99753	0.99789	0.99806	0.9956	0.99744	0.99987	0.99432	0.99804	0.95129
0.95155	0.91048	0.98847	0.99572	0.99896	0.99359	0.99906	0.98887	0.99935	0.9968	0.99733	0.99755	0.99564	0.99782	0.9999	0.99738	0.99658	0.99562
0.94441	0.89654	0.99373	0.99452	0.9976	0.99358	0.9992	0.9939	0.99912	0.99582	0.99648	0.99675	0.99573	0.99803	0.99987	0.99836	0.99531	0.99545
0.93458	0.88836	0.99513	0.99493	0.9976	0.99454	0.99935	0.99533	0.99898	0.99627	0.99689	0.99714	0.99657	0.99846	0.99974	0.99745	0.99579	0.99638
0.93251	0.88663	0.99512	0.99587	0.99804	0.99561	0.99945	0.99528	0.99901	0.99703	0.99748	0.99768	0.99727	0.99882	0.99966	0.99699	0.9966	0.99715
0.94473	0.90266	0.98424	0.99561	0.99866	0.99143	0.99774	0.98432	0.99849	0.99613	0.99647	0.99667	0.9934	0.91205	0.99973	0.99474	0.99591	0.9534
0.98618	0.95668	0.95715	0.98777	0.993	0.97575	0.98903	0.95648	0.99169	0.98887	0.98758	0.98782	0.97696	0.98878	0.99522	0.97169	0.98959	0.98274
0.96917	0.93701	0.96139	0.99864	0.99732	0.99263	0.99744	0.96308	0.99754	0.99879	0.99864	0.99866	0.99351	0.96808	0.99908	0.97652	0.99829	0.97716
0.95678	0.91669	0.98582	0.99625	0.99923	0.99366	0.99899	0.98637	0.99941	0.99715	0.99763	0.99781	0.9955	0.99773	0.9998	0.99605	0.99701	0.99566
0.95046	0.91085	0.9836	0.99671	0.9994	0.99337	0.99872	0.98426	0.99925	0.99734	0.99775	0.99791	0.99547	0.99747	0.99987	0.99441	0.99728	0.95148
0.95222	0.91029	0.9888	0.99641	0.99919	0.99457	0.99927	0.9893	0.99957	0.99738	0.99778	0.99797	0.99626	0.99805	0.99992	0.99778	0.99716	0.99623
0.95425	0.91207	0.98898	0.99464	0.99835	0.99232	0.99875	0.98915	0.99907	0.99586	0.99644	0.99669	0.99455	0.99722	0.99984	0.99763	0.99554	0.99447
0.94629	0.89694	0.99447	0.99244	0.99601	0.99169	0.99881	0.99458	0.9985	0.99378	0.99484	0.99519	0.99414	0.99732	0.99973	0.99775	0.99308	0.99378
0.94756	0.89853	0.99372	0.99401	0.99724	0.99346	0.99913	0.99392	0.99886	0.99534	0.99613	0.9964	0.99339	0.99812	0.99969	0.99786	0.99484	0.99522
0.94707	0.90307	0.99166	0.99446	0.9979	0.99322	0.999	0.99192	0.99894	0.99573	0.99644	0.99671	0.99554	0.99793	0.99973	0.9979	0.99535	0.99523
0.9544	0.91438	0.97499	0.99626	0.99817	0.99037	0.99665	0.9751	0.99774	0.99643	0.99654	0.99667	0.99178	0.9544	0.99934	0.9875	0.996	0.96586
0.98568	0.95425	0.95977	0.98866	0.99379	0.97729	0.99015	0.95938	0.99274	0.98995	0.98864	0.98888	0.97871	0.98982	0.99556	0.9748	0.99052	0.98401
0.98365	0.95536	0.95726	0.99451	0.99625	0.98526	0.99372	0.95776	0.99562	0.99509	0.99447	0.99459	0.98622	0.9933	0.99752	0.97207	0.99467	0.9898
0.9705	0.93662	0.96597	0.99584	0.99725	0.98866	0.99543	0.96617	0.99681	0.99602	0.9959	0.996	0.98953	0.99354	0.99848	0.97968	0.99554	0.99091
0.95773	0.91654	0.98681	0.99564	0.999	0.99289	0.99888	0.98713	0.99937	0.99679	0.99721	0.99742	0.99491	0.99736	0.99982	0.99692	0.99648	0.9951
0.94995	0.90981	0.9859	0.9958	0.99907	0.99259	0.99862	0.98627	0.99914	0.99669	0.99718	0.99739	0.99481	0.99699	0.99988	0.99603	0.99651	0.95381
0.94793	0.90514	0.99125	0.99372	0.99759	0.9919	0.99873	0.99151	0.99876	0.99506	0.99579	0.9961	0.99447	0.99731	0.9998	0.99807	0.99461	0.99419
0.93817	0.88785	0.99549	0.99502	0.99733	0.99486	0.99934	0.99568	0.99886	0.99635	0.99692	0.99716	0.99481	0.99861	0.9996	0.99732	0.99562	0.99649
0.93376	0.88288	0.99654	0.99575	0.9976	0.99576	0.99951	0.99667	0.999	0.99694	0.9974	0.99761	0.99572	0.99891	0.99967	0.99575	0.99634	0.99718
0.93751	0.88843	0.99487	0.99609	0.99808	0.99588	0.99942	0.99501	0.99894	0.9972	0.99761	0.99779	0.99583	0.99891	0.99958	0.99661	0.99676	0.99732
0.95197	0.9121	0.98326	0.99523	0.99856	0.99084	0.99761	0.9835	0.99838	0.99581	0.99615	0.99636	0.993	0.99559	0.99971	0.99407	0.99561	0.95513
0.98106	0.94417	0.97089	0.992	0.9965	0.98394	0.99435	0.9712	0.99629	0.99326	0.99253	0.99275	0.98556	0.99333	0.9978	0.9856	0.9934	0.98839
0.98558	0.95611	0.95947	0.99281	0.99617	0.98296	0.99306	0.96002	0.99528	0.99397	0.99301	0.99317	0.98436	0.9929	0.99731	0.97466	0.99391	0.98854
0.97847	0.94736	0.96419	0.99654	0.99798	0.98918	0.9962	0.96518	0.99767	0.99725	0.99673	0.99683	0.99045	0.99544	0.99852	0.97931	0.99691	0.99292
0.9602	0.91955	0.9853	0.99556	0.99896	0.99238	0.99865	0.98563	0.99926	0.99672	0.99708	0.99729	0.99433	0.99697	0.99969	0.99609	0.99639	0.99471
0.95728	0.91908	0.98109	0.99619	0.99912	0.99181	0.99806	0.98155	0.99883	0.99679	0.99711	0.99729	0.99386	0.99646	0.99976	0.99277	0.99665	0.95987
0.94598	0.8988	0.99323	0.99371	0.99719	0.99266	0.999	0.99342	0.99891	0.99516	0.99592	0.99623	0.99504	0.99768	0.99981	0.99826	0.99455	0.99473
0.94323	0.89708	0.99364	0.9939	0.99733	0.99254	0.99894	0.99372	0.99899	0.99509	0.9958	0.9961	0.99459	0.99712	0.99991	0.99882	0.99462	0.99434
0.93226	0.88104	0.99686	0.99386	0.99625	0.99387	0.99925	0.99694	0.99861	0.99544	0.99622	0.9965	0.99381	0.99836	0.99961	0.99763	0.9945	0.99593
0.93674	0.88717	0.99533	0.99544	0.99761	0.99539	0.99934	0.99554	0.99876	0.99674	0.99724	0.99745	0.99534	0.99891	0.99952	0.99626	0.99616	0.99701
0.93727	0.89451	0.99122	0.99454	0.99808	0.99226	0.99861	0.99136	0.9989	0.99566	0.99621	0.99647	0.99458	0.90238	0.99986	0.99849	0.99662	0.94297
0.98028	0.94593	0.96856	0.98519	0.99204	0.97459	0.9901	0.96792	0.99197	0.98635	0.9855	0.9859	0.97672	0.9881	0.99676	0.98153	0.98712	0.98014
0.97997	0.95039	0.95872	0.99372	0.99557	0.98458	0.99307	0.95845	0.99483	0.99387	0.99356	0.99367	0.98531	0.99169	0.99749	0.97229	0.99348	0.98805
0.96831	0.93276	0.97481	0.99603	0.99872	0.99023	0.9972	0.97523	0.99834	0.9968	0.99675	0.99689	0.9919	0.99538	0.99916	0.98818	0.9965	0.99291
0.95384	0.91057	0.98924	0.99463	0.99824	0.99222	0.99871	0.98951	0.99921	0.99595	0.99643	0.99668	0.9943	0.99683	0.99983	0.99829	0.99552	0.99439
0.95278	0.90956	0.9896	0.9951	0.9985	0.99298	0.99891	0.98981	0.99933	0.99629	0.99685	0.99709	0.99494	0.99722	0.99984	0.99826	0.99595	0.99497
0.95401	0.91225	0.98903	0.99376	0.99786	0.99118	0.99845	0.98917	0.99873	0.99498	0.99569	0.99598	0.99377	0.99686	0.99978	0.99741	0.99465	0.99356
0.95379	0.91242	0.98884	0.99365	0.99775	0.99108	0.99832	0.98907	0.99857	0.9947	0.99542	0.99573	0.99347	0.9967	0.99973	0.99724	0.99443	0.99317
0.94709	0.90271	0.9916	0.99502	0.99811	0.99399	0.99914	0.99192	0.99895	0.99624	0.99683	0.99708	0.99615	0.99833	0.99966	0.99762	0.9959	0.99587
0.94691	0.90607	0.98882	0.99499	0.99851	0.99275	0.99877	0.98937	0.99897	0.9961	0.9967	0.99694	0.99522	0.99759	0.99977	0.99717	0.99588	0.95124
0.96586	0.93008	0.96575	0.9955	0.99659	0.98849	0.99486	0.96559	0.99614	0.99536	0.99536	0.99544	0.98902	0.99225	0.99806	0.97917	0.99473	0.97064
0.98516	0.95501	0.95897	0.98601	0.99206	0.97366	0.98823	0.9583	0.9909	0.98709	0.98573	0.98605	0.97498	0.98781	0.99533	0.97314	0.98801	0.98066
0.98207	0.95309	0.95891	0.99412	0.99609	0.98498	0.99351	0.95908	0.99537	0.99455	0.99401	0.99415	0.9858	0.99272	0.99762	0.97303	0.99427	0.98894
0.96592	0.93078	0.97221	0.99753	0.99894	0.99211	0.99786	0.97327	0.99876	0.99817	0.99807	0.99817	0.99372	0.99653	0.99935	0.98615	0.99788	0.99478
0.95238	0.91243	0.98631	0.99588	0.99911	0.99297	0.9988	0.98671	0.99926	0.99682	0.99731	0.99752	0.9951	0.99732	0.99986	0.99627	0.99662	0.95582
0.95206	0.91261	0.984	0.99612	0.99923	0.99257	0.99849	0.98458	0.99912	0.99692	0.99732	0.99752	0.99482	0.99703	0.99986	0.99484	0.99676	0.99477
0.95614	0.91662	0.98619	0.99466	0.99851	0.99134	0.99829	0.98655	0.99882	0.99562	0.99618	0.99644	0.99377	0.99676	0.99982	0.99614	0.99542	0.99362
0.94888	0.90243	0.99164	0.99408	0.99743	0.99317	0.99888	0.99218	0.99853	0.99539	0.99604	0.99632	0.99546	0.99813	0.99941	0.9972	0.99499	0.99507
0.94265	0.89505	0.99344	0.99563	0.99813	0.99522	0.99936	0.99372	0.99894	0.99686	0.99735	0.99756	0.99706	0.99882	0.9996	0.99722	0.99646	0.99686
0.94427	0.90306	0.98984	0.99485	0.99836	0.99267	0.99871	0.99014	0.99893	0.99592	0.99649	0.99675	0.99509	0.99737	0.99981	0.99768	0.99568	0.94891
0.96497	0.9282	0.97385	0.9934	0.99665	0.98653	0.99473	0.97347	0.99605	0.99356	0.99365	0.99384	0.98769	0.99162	0.99858	0.98606	0.99316	0.98816
0.97964	0.9431	0.96973	0.9822	0.99015	0.97116	0.98923	0.96906	0.99073	0.98368	0.98244	0.98288	0.97369	0.98703	0.99598	0.98296	0.98514	0.97778
0.98744	0.9591	0.95471	0.98904	0.99364	0.97704	0.98967	0.95439	0.99234	0.99048	0.98899	0.9892	0.97843	0.98992	0.99543	0.96965	0.99091	0.98454
0.97118	0.93814	0.96797	0.99786	0.99864	0.99217	0.99768	0.96942	0.99852	0.99851	0.99817	0.99824	0.99346	0.99663	0.99898	0.98279	0.99818	0.99516
0.95456	0.91466	0.98664	0.99559	0.99896	0.9929	0.99879	0.98718	0.9992	0.99657	0.99706	0.99728	0.99509	0.99754	0.99987	0.99642	0.99637	0.99498
0.97384	0.93967	0.97231	0.99759	0.99917	0.99261	0.99817	0.97378	0.99905	0.99843	0.99818	0.99828	0.99419	0.99758	0.99927	0.98659	0.9983	0.99578
0.96653	0.92793	0.98252	0.99325	0.99769	0.98845	0.99707	0.98254	0.99797	0.99405	0.99449	0.99476	0.99065	0.99504	0.99942	0.99368	0.99393	0.99077
0.95106	0.90268	0.99244	0.99407	0.99748	0.9928	0.99905	0.9927	0.99898	0.99526	0.99603	0.99631	0.99499	0.99785	0.99978	0.99827	0.99479	0.99478
0.9451	0.89654	0.99342	0.99448	0.99751	0.99403	0.99915	0.99368	0.99875	0.9959	0.99656	0.99681	0.99396	0.99843	0.99955	0.99731	0.99536	0.99587
0.93268	0.88706	0.99528	0.99501	0.99752	0.99471	0.9993	0.9954	0.99883	0.99634	0.99694	0.99719	0.99673	0.99861	0.99962	0.99701	0.99583	0.93785
0.95127	0.91066	0.98154	0.99525	0.99845	0.99033	0.99723	0.98163	0.99814	0.99575	0.99608	0.99629	0.99242	0.9197	0.99965	0.99269	0.99548	0.95434
0.98394	0.95085	0.9605	0.98488	0.99131	0.97261	0.98775	0.95987	0.99038	0.98595	0.98451	0.98481	0.97395	0.98707	0.99437	0.97539	0.98637	0.97974
0.98204	0.95325	0.9564	0.9938	0.99545	0.9847	0.99276	0.95675	0.99475	0.99442	0.99354	0.99365	0.98516	0.99227	0.99673	0.97104	0.9939	0.98895
0.96752	0.934	0.96706	0.9984	0.99835	0.99278	0.99785	0.96852	0.99834	0.99878	0.99858	0.99863	0.99404	0.99681	0.99918	0.9818	0.99843	0.99546
0.95181	0.9122	0.98509	0.99637	0.9993	0.99332	0.99879	0.9856	0.9993	0.99715	0.99759	0.99777	0.99535	0.99736	0.99984	0.99552	0.997	0.99538
0.95411	0.91466	0.98542	0.99584	0.99912	0.99262	0.99863	0.98582	0.99918	0.99674	0.99718	0.99738	0.99475	0.99713	0.99986	0.99584	0.99658	0.95711
0.94335	0.89332	0.99492	0.99372	0.99686	0.99295	0.99912	0.99499	0.99897	0.99501	0.9958	0.9961	0.99288	0.99755	0.99991	0.99825	0.99437	0.99472
0.93737	0.88763	0.99548	0.99538	0.99773	0.99504	0.99949	0.99565	0.99918	0.9966	0.99716	0.99739	0.99498	0.99858	0.99982	0.99802	0.99601	0.9966
0.93141	0.88019	0.99693	0.99559	0.99741	0.99556	0.9995	0.99692	0.99901	0.99676	0.99725	0.99746	0.99551	0.99877	0.9997	0.99769	0.99612	0.99699
0.93546	0.88769	0.99517	0.9957	0.99792	0.99549	0.99943	0.99531	0.99894	0.99685	0.99736	0.99758	0.99544	0.99889	0.99964	0.99686	0.99643	0.99706
0.94979	0.90895	0.9843	0.99448	0.99803	0.98999	0.99717	0.98432	0.99808	0.99514	0.9954	0.99565	0.99202	0.91741	0.99955	0.99484	0.99482	0.9498
0.97666	0.94705	0.96045	0.9981	0.99759	0.99154	0.99695	0.96243	0.99771	0.99843	0.99809	0.99812	0.99239	0.99654	0.99873	0.9764	0.99804	0.99472
0.95861	0.92092	0.97068	0.99739	0.99799	0.99179	0.99698	0.97104	0.99778	0.99736	0.99743	0.9975	0.99271	0.93046	0.99919	0.98397	0.99689	0.97097
0.94923	0.90739	0.97179	0.99648	0.99749	0.9905	0.99606	0.97206	0.99719	0.99672	0.9965	0.99659	0.99133	0.91804	0.99852	0.9852	0.99602	0.96776
0.96811	0.9321	0.97555	0.99208	0.99596	0.98533	0.99426	0.97488	0.99568	0.99203	0.99223	0.99247	0.98613	0.99103	0.99816	0.9874	0.992	0.98672
0.93713	0.887	0.99661	0.99261	0.9953	0.99248	0.99911	0.99672	0.99849	0.99423	0.99525	0.9956	0.99239	0.99772	0.9997	0.99789	0.99572	0.99468
0.95298	0.9129	0.97065	0.99742	0.99787	0.99174	0.99683	0.97105	0.9977	0.99753	0.99748	0.99754	0.99255	0.92317	0.99899	0.98411	0.99691	0.9705
0.94679	0.90469	0.9909	0.99189	0.99643	0.98953	0.9979	0.99097	0.99807	0.99318	0.99409	0.99449	0.99248	0.99582	0.99969	0.99767	0.9927	0.99192
0.9861	0.95933	0.95476	0.99252	0.99512	0.9818	0.99193	0.9548	0.99415	0.99322	0.99242	0.99255	0.98287	0.99184	0.99712	0.96899	0.99308	0.98738
0.96325	0.91993	0.98986	0.98626	0.99257	0.98366	0.99696	0.98985	0.99641	0.98868	0.99005	0.99073	0.98821	0.99461	0.9995	0.99642	0.98751	0.98818
0.96378	0.92092	0.98968	0.9891	0.99452	0.98729	0.99783	0.99003	0.99732	0.99114	0.99257	0.99307	0.99144	0.99661	0.9992	0.99636	0.99016	0.99113
0.96836	0.93131	0.97954	0.99592	0.9989	0.99129	0.99769	0.98003	0.99866	0.99637	0.99652	0.99669	0.99271	0.99632	0.99935	0.9921	0.99631	0.99307
0.96752	0.93223	0.97302	0.99583	0.99819	0.98952	0.99645	0.97321	0.9977	0.9961	0.99613	0.99626	0.99081	0.9945	0.999	0.98603	0.99576	0.99156
0.97081	0.93686	0.96679	0.99561	0.99737	0.98841	0.99541	0.96713	0.99687	0.99605	0.99572	0.99582	0.98941	0.99352	0.99827	0.98097	0.99556	0.99107
0.95988	0.91553	0.98781	0.99032	0.99545	0.98636	0.99688	0.98764	0.99744	0.99193	0.9923	0.99269	0.98904	0.99378	0.99933	0.99707	0.99145	0.98928
0.94878	0.9009	0.9925	0.994	0.99749	0.99279	0.99904	0.99269	0.99898	0.99529	0.99614	0.99642	0.99508	0.99771	0.99978	0.99828	0.99476	0.99487
0.94182	0.89164	0.99543	0.9948	0.99738	0.99435	0.9994	0.99549	0.99913	0.996	0.99669	0.99693	0.99429	0.99834	0.99982	0.99757	0.99717	0.99601
0.9386	0.88848	0.99559	0.99446	0.99716	0.994	0.9993	0.99566	0.99897	0.99575	0.9964	0.99667	0.99394	0.99827	0.99977	0.9973	0.99518	0.99577
0.93651	0.89213	0.98653	0.99491	0.99812	0.99101	0.99759	0.98658	0.99835	0.99582	0.99598	0.99621	0.99295	0.90201	0.99949	0.99671	0.99543	0.94782
0.95293	0.91006	0.99019	0.99076	0.99557	0.98775	0.99718	0.98989	0.99738	0.99154	0.99245	0.99283	0.99008	0.99425	0.99958	0.99755	0.99137	0.98956
0.93209	0.88084	0.99699	0.99426	0.99656	0.99415	0.99933	0.9971	0.99872	0.99558	0.99625	0.99651	0.99408	0.99841	0.99967	0.99787	0.99491	0.99595
0.96795	0.93298	0.97478	0.99594	0.99847	0.99016	0.99688	0.9751	0.99798	0.99625	0.99636	0.9965	0.99165	0.99521	0.99928	0.98767	0.99604	0.99204
0.96385	0.92598	0.98261	0.99343	0.99765	0.98856	0.99686	0.9826	0.99778	0.99405	0.99445	0.9947	0.99067	0.99472	0.99943	0.99354	0.99393	0.99058
0.95038	0.9023	0.99252	0.99297	0.99677	0.99172	0.99877	0.99281	0.99861	0.99436	0.9952	0.99552	0.99419	0.99749	0.9997	0.99799	0.9938	0.99389
0.93549	0.88503	0.99597	0.99575	0.99789	0.99553	0.99959	0.99611	0.99934	0.99702	0.99755	0.99776	0.99548	0.99863	0.99988	0.99728	0.99639	0.99704
0.94482	0.90344	0.98952	0.995	0.99849	0.99259	0.9987	0.9898	0.99908	0.9961	0.99663	0.99688	0.99492	0.9971	0.99989	0.99784	0.99578	0.94934
0.94095	0.89728	0.98686	0.99264	0.99673	0.98813	0.99651	0.98653	0.99737	0.99327	0.99387	0.99416	0.99027	0.90641	0.99944	0.99602	0.99289	0.94464
0.94162	0.89864	0.99299	0.99148	0.99577	0.98966	0.99801	0.99288	0.99783	0.99281	0.99362	0.99403	0.9924	0.99584	0.99964	0.99787	0.99236	0.94541
0.94091	0.89539	0.99387	0.99279	0.9965	0.99153	0.9987	0.99401	0.99853	0.99421	0.99502	0.99537	0.99409	0.99706	0.99974	0.99806	0.99359	0.99377
0.9434	0.89912	0.99305	0.99153	0.99587	0.98976	0.99812	0.99296	0.99812	0.99285	0.99376	0.99417	0.99239	0.99576	0.99979	0.99829	0.99234	0.99191
0.97098	0.93356	0.97808	0.99296	0.99732	0.98684	0.99604	0.97811	0.99738	0.99413	0.99398	0.99421	0.98879	0.99379	0.99881	0.99091	0.99389	0.98985
0.96837	0.92797	0.98201	0.99456	0.99835	0.99005	0.99759	0.98251	0.99859	0.99538	0.99566	0.99588	0.99186	0.99611	0.99936	0.9941	0.99534	0.99248
0.95854	0.9177	0.98709	0.99348	0.99784	0.9905	0.99819	0.98763	0.99857	0.9946	0.9954	0.99571	0.9933	0.9968	0.99976	0.9965	0.9944	0.99306
0.96233	0.9177	0.98583	0.99523	0.99843	0.99221	0.99862	0.98613	0.99916	0.99671	0.99689	0.99711	0.99444	0.99723	0.9994	0.99618	0.99631	0.99523
0.93549	0.89371	0.99858	0.99693	0.99782	0.99643	0.99941	0.99858	0.99952	0.99777	0.99776	0.99789	0.99692	0.99756	0.99947	0.99896	0.99726	0.99713
0.93421	0.89243	0.99859	0.99732	0.99805	0.99693	0.99935	0.9986	0.9995	0.99816	0.99814	0.99824	0.99732	0.99755	0.99937	0.9987	0.99762	0.9975
0.94249	0.90618	0.99855	0.99546	0.99674	0.9948	0.99937	0.99852	0.99924	0.99591	0.99639	0.99657	0.99553	0.99728	0.99958	0.99939	0.9959	0.99575
0.94213	0.90985	0.99896	0.99532	0.99664	0.99472	0.99946	0.99895	0.99916	0.99586	0.99593	0.9961	0.99466	0.99724	0.99968	0.99963	0.99575	0.99537
0.93092	0.90384	0.99966	0.99762	0.99818	0.99736	0.99975	0.99967	0.99967	0.99789	0.99797	0.99806	0.99733	0.9982	0.99978	0.99946	0.99776	0.99771
0.97208	0.92982	0.97709	0.982	0.9894	0.97385	0.99055	0.97672	0.99115	0.98359	0.98256	0.98299	0.97618	0.98668	0.99532	0.99008	0.98508	0.97873
0.96401	0.92752	0.97731	0.99596	0.99884	0.99046	0.99744	0.97782	0.99847	0.99658	0.9967	0.99686	0.99249	0.99576	0.99952	0.9899	0.99631	0.99298
0.97168	0.93119	0.98117	0.99501	0.99867	0.99069	0.99785	0.98182	0.99866	0.9956	0.99589	0.9961	0.99237	0.9967	0.99943	0.99349	0.99565	0.99271
0.96165	0.92144	0.98562	0.9908	0.99596	0.9863	0.99633	0.98537	0.99704	0.99165	0.99226	0.99265	0.9886	0.99347	0.99936	0.99513	0.99144	0.98851
0.96058	0.92073	0.98579	0.99007	0.99544	0.98552	0.99606	0.98546	0.99663	0.99096	0.99161	0.99204	0.98799	0.99292	0.99935	0.9949	0.99069	0.98775
0.96123	0.92237	0.98427	0.99155	0.99647	0.98661	0.9963	0.98404	0.99711	0.99239	0.9929	0.99325	0.98901	0.99347	0.99941	0.99427	0.9921	0.98889
0.95965	0.92113	0.98344	0.99324	0.99755	0.98835	0.99686	0.98339	0.99777	0.99403	0.99443	0.99473	0.99074	0.99447	0.99952	0.99403	0.99373	0.99058
0.95674	0.9173	0.98544	0.99413	0.99822	0.9902	0.99785	0.98563	0.99859	0.99519	0.99566	0.99594	0.99273	0.9959	0.99976	0.99577	0.99483	0.99266
0.95749	0.91763	0.98626	0.99375	0.99802	0.99014	0.99794	0.98659	0.99859	0.99485	0.99546	0.99574	0.99279	0.99614	0.99978	0.99629	0.99457	0.99269
0.95679	0.91407	0.98856	0.99348	0.99772	0.9906	0.99832	0.98859	0.99878	0.99486	0.99546	0.99578	0.99307	0.99634	0.99978	0.99767	0.99435	0.99309
0.94125	0.89091	0.99546	0.99315	0.99617	0.99263	0.99911	0.99562	0.99872	0.99463	0.99554	0.99588	0.99255	0.99782	0.99976	0.99725	0.99378	0.99477
0.93316	0.88312	0.99767	0.99554	0.99733	0.99529	0.9996	0.99768	0.99935	0.99647	0.9971	0.9973	0.99524	0.99825	0.9999	0.99858	0.99595	0.99659
0.96677	0.92857	0.98155	0.99265	0.99685	0.98741	0.99587	0.98136	0.99698	0.99294	0.99319	0.99341	0.98878	0.99339	0.99878	0.99284	0.993	0.9888
0.96186	0.92287	0.98437	0.98999	0.99528	0.98496	0.99554	0.98398	0.99626	0.99068	0.99123	0.99161	0.98726	0.99229	0.99915	0.99392	0.99055	0.98694
0.93817	0.88823	0.99553	0.99415	0.99696	0.99388	0.99927	0.99564	0.99883	0.9956	0.99635	0.99664	0.99382	0.9983	0.99972	0.99707	0.99491	0.99579
0.93102	0.87979	0.99696	0.99516	0.9971	0.99522	0.99941	0.99704	0.9988	0.99643	0.99698	0.99722	0.99516	0.9988	0.99961	0.99756	0.99575	0.99682
0.94781	0.90366	0.99181	0.99342	0.99725	0.99192	0.99873	0.99214	0.9987	0.99481	0.99556	0.99588	0.99447	0.99736	0.99975	0.99803	0.99429	0.99409
0.95001	0.90929	0.98425	0.99394	0.99773	0.98927	0.99691	0.9842	0.99774	0.99449	0.9949	0.99515	0.99156	0.91785	0.99956	0.99428	0.99422	0.95273
0.94633	0.90506	0.98548	0.9954	0.99869	0.99162	0.99804	0.98568	0.99865	0.99611	0.99651	0.99672	0.99381	0.91372	0.99976	0.99562	0.99594	0.94941
0.95178	0.9117	0.9838	0.99488	0.99851	0.99053	0.99765	0.98402	0.99844	0.99564	0.99606	0.99631	0.99302	0.99566	0.99977	0.99435	0.99537	0.95464
0.90934	0.86225	0.90032	0.98294	0.96687	0.98921	0.99159	0.91109	0.97222	0.98276	0.98276	0.98276	0.98909	0.87819	0.99328	0.91906	0.92335	0.99032
0.9636	0.92767	0.97103	0.99722	0.9983	0.99136	0.99712	0.97165	0.99809	0.99737	0.99742	0.99752	0.99259	0.99543	0.9993	0.98456	0.99702	0.96679
0.96842	0.92606	0.9831	0.9906	0.99562	0.98537	0.99549	0.98285	0.99658	0.99115	0.99136	0.99169	0.98674	0.99278	0.99863	0.99412	0.99131	0.98729
0.97025	0.93232	0.9791	0.98874	0.99434	0.98196	0.99376	0.97857	0.99498	0.9894	0.98942	0.98981	0.98358	0.99038	0.99823	0.99048	0.98952	0.98446
0.96882	0.93382	0.97168	0.99588	0.99829	0.98917	0.99651	0.97216	0.99785	0.99658	0.99635	0.99649	0.99088	0.99477	0.99904	0.98536	0.99615	0.99215
0.96887	0.93226	0.97745	0.99292	0.99722	0.98652	0.99579	0.97741	0.99718	0.99404	0.99393	0.99417	0.98859	0.99336	0.99887	0.99006	0.99369	0.98956
0.94395	0.89488	0.99528	0.98897	0.99308	0.9882	0.9982	0.99509	0.99739	0.99084	0.99207	0.99259	0.98807	0.99526	0.99979	0.99791	0.98963	0.99084
0.94686	0.8984	0.99412	0.98728	0.99198	0.98597	0.99744	0.99389	0.99652	0.98909	0.99029	0.99087	0.989	0.99389	0.99965	0.99744	0.98802	0.98872
0.92154	0.87864	0.99929	0.99692	0.99752	0.99694	0.99969	0.99927	0.99937	0.99753	0.99795	0.9981	0.9969	0.99847	0.99975	0.99857	0.99692	0.99774
0.92219	0.87941	0.9993	0.99718	0.99776	0.99716	0.99971	0.99928	0.99943	0.99773	0.99811	0.99826	0.99713	0.99851	0.99976	0.99853	0.99718	0.9979
0.92686	0.88483	0.9992	0.99646	0.99742	0.99638	0.99974	0.99919	0.99943	0.99721	0.99763	0.99779	0.99732	0.99827	0.99983	0.99886	0.99667	0.9973
0.9596	0.9226	0.97442	0.99782	0.99911	0.99285	0.99812	0.97582	0.99898	0.99828	0.99834	0.99844	0.99461	0.99697	0.99953	0.9878	0.99812	0.96367
0.96906	0.93143	0.97916	0.9916	0.99628	0.98535	0.99515	0.97903	0.9965	0.99237	0.99231	0.99262	0.98705	0.99246	0.99861	0.99136	0.99224	0.98775
0.97315	0.93813	0.97347	0.99196	0.99609	0.98446	0.99412	0.97317	0.99576	0.99249	0.99228	0.99253	0.98579	0.9915	0.99802	0.98648	0.99239	0.98709
0.97855	0.9489	0.95666	0.99526	0.9959	0.98675	0.99401	0.95704	0.9956	0.99553	0.99507	0.99515	0.98733	0.99301	0.99757	0.97106	0.99501	0.99025
0.96736	0.92373	0.98459	0.99148	0.99674	0.98689	0.99729	0.98467	0.99808	0.99357	0.99381	0.99417	0.99033	0.99538	0.99947	0.9956	0.99299	0.99103
0.95388	0.91204	0.98895	0.99371	0.99788	0.99125	0.99855	0.98927	0.99878	0.99494	0.9958	0.99611	0.99403	0.99711	0.99981	0.99735	0.9946	0.99381
0.94049	0.89716	0.99288	0.99423	0.99773	0.99301	0.99902	0.99306	0.99899	0.99562	0.99634	0.99663	0.99537	0.99761	0.99984	0.9984	0.99514	0.94586
0.95632	0.91611	0.98601	0.99534	0.99886	0.99207	0.99857	0.98636	0.9992	0.99645	0.99692	0.99715	0.99432	0.99692	0.9998	0.99644	0.9962	0.9946
0.94726	0.89757	0.99397	0.9928	0.99647	0.99163	0.99882	0.99402	0.99882	0.99426	0.9951	0.99542	0.99154	0.99689	0.99988	0.99875	0.99363	0.9937
0.9437	0.89346	0.99493	0.99384	0.99698	0.99308	0.99915	0.99494	0.99908	0.99515	0.99598	0.99627	0.99301	0.99755	0.99991	0.99844	0.99456	0.99491
0.94002	0.88912	0.99585	0.99386	0.99663	0.99323	0.99925	0.99592	0.99906	0.99522	0.996	0.9963	0.99315	0.99767	0.9999	0.9986	0.99445	0.99514
0.97227	0.93531	0.97739	0.99228	0.99653	0.98584	0.99499	0.97714	0.99648	0.99257	0.99263	0.99288	0.98694	0.99259	0.99835	0.98984	0.99266	0.9878
0.97004	0.93364	0.97754	0.99054	0.99541	0.9838	0.99416	0.97702	0.99548	0.99088	0.99098	0.99127	0.98515	0.99097	0.99837	0.98921	0.99089	0.98568
0.96529	0.92718	0.98132	0.99331	0.99744	0.98805	0.9965	0.98119	0.99756	0.99404	0.9942	0.99447	0.98976	0.99384	0.99914	0.99294	0.9938	0.99006
0.97239	0.93808	0.97239	0.99304	0.9967	0.98555	0.99465	0.97202	0.99612	0.99332	0.99335	0.99357	0.987	0.9921	0.99852	0.98491	0.99312	0.98792
0.93161	0.88038	0.99675	0.99332	0.99584	0.99339	0.99915	0.9969	0.99844	0.99507	0.99585	0.99618	0.99331	0.99819	0.99956	0.99758	0.99397	0.99557
0.91687	0.86543	0.99875	0.99679	0.99752	0.99697	0.99954	0.99875	0.99898	0.99762	0.99801	0.99818	0.99693	0.99903	0.99959	0.99768	0.99696	0.99803
0.92926	0.87771	0.99775	0.995	0.99688	0.99495	0.99953	0.99779	0.99909	0.99619	0.99684	0.99708	0.99489	0.99836	0.99983	0.9983	0.99722	0.99646
0.92897	0.87722	0.99777	0.99591	0.99742	0.9959	0.99963	0.99774	0.99928	0.99699	0.99755	0.99775	0.99585	0.99858	0.99982	0.99817	0.99623	0.99721
0.94268	0.899	0.99303	0.99348	0.99719	0.99181	0.99876	0.99307	0.99881	0.99486	0.99553	0.99586	0.99422	0.99691	0.9999	0.9987	0.99429	0.994
0.9545	0.91517	0.9837	0.99479	0.99874	0.99063	0.99807	0.98403	0.9987	0.99586	0.99648	0.99675	0.99367	0.99641	0.99986	0.99418	0.99557	0.95665
0.96904	0.93341	0.97546	0.99497	0.9979	0.98899	0.99615	0.97544	0.99742	0.9952	0.99523	0.9954	0.99003	0.99384	0.99874	0.98839	0.99499	0.99058
0.97057	0.93776	0.96365	0.99765	0.99763	0.99105	0.99686	0.96454	0.99766	0.99786	0.99768	0.99774	0.99211	0.99547	0.99889	0.97817	0.99736	0.97365
0.98116	0.95161	0.9593	0.99398	0.99596	0.9851	0.99337	0.9592	0.99515	0.99423	0.99378	0.99392	0.98569	0.99217	0.9973	0.97328	0.99395	0.98862
0.96909	0.92929	0.98189	0.99444	0.99846	0.98996	0.99777	0.9824	0.99865	0.99542	0.99575	0.99599	0.992	0.99627	0.99956	0.99388	0.99529	0.99261
0.94237	0.89251	0.99508	0.99352	0.99646	0.99316	0.99912	0.99525	0.99863	0.99501	0.99589	0.9962	0.99308	0.99815	0.99959	0.99698	0.99419	0.99526
0.94355	0.8937	0.99488	0.99507	0.99753	0.99462	0.9994	0.99496	0.99907	0.99627	0.99702	0.99726	0.99456	0.99843	0.99969	0.99747	0.99565	0.99641
0.9402	0.89648	0.99332	0.99488	0.99799	0.9938	0.99915	0.99344	0.99912	0.99612	0.99669	0.99693	0.99584	0.99786	0.99986	0.99849	0.99576	0.946
0.95617	0.91669	0.98515	0.99531	0.9988	0.99176	0.99824	0.98544	0.99897	0.99621	0.99658	0.99678	0.99374	0.99634	0.99977	0.99587	0.99596	0.99378
0.95228	0.91284	0.98237	0.99623	0.99898	0.99214	0.99805	0.98269	0.9987	0.99674	0.99702	0.99718	0.99401	0.99631	0.99972	0.99357	0.99665	0.9562
0.96221	0.92585	0.97224	0.99747	0.99855	0.99197	0.99748	0.97285	0.99835	0.99766	0.99773	0.99781	0.99325	0.99583	0.99946	0.98558	0.99734	0.96588
0.95972	0.91649	0.98768	0.99376	0.99779	0.99073	0.99806	0.9879	0.99863	0.99458	0.99514	0.9954	0.9926	0.99624	0.99964	0.99735	0.99453	0.99246
0.95522	0.91168	0.98947	0.99324	0.99744	0.99056	0.99825	0.98958	0.99863	0.99434	0.99508	0.99539	0.99294	0.9963	0.99977	0.99792	0.99403	0.99276
0.94537	0.90082	0.9924	0.99542	0.99839	0.99435	0.99929	0.99259	0.9993	0.99662	0.99716	0.99738	0.99623	0.99816	0.99988	0.99845	0.99627	0.99605
0.93389	0.88283	0.9966	0.99521	0.99729	0.99504	0.99949	0.99663	0.99908	0.99644	0.99702	0.99725	0.99498	0.99857	0.99978	0.99797	0.99577	0.99659
0.92172	0.86939	0.9986	0.997	0.99797	0.99706	0.99974	0.99856	0.9994	0.99796	0.99834	0.9985	0.99703	0.99879	0.9998	0.99804	0.99725	0.99814
0.93268	0.88197	0.99754	0.99584	0.99745	0.99573	0.99962	0.99746	0.99932	0.99684	0.99743	0.99765	0.99569	0.99848	0.99982	0.99818	0.99618	0.99703
0.94696	0.90241	0.9917	0.99572	0.99865	0.99425	0.99926	0.99182	0.99952	0.99688	0.99739	0.9976	0.99592	0.99762	0.9999	0.99892	0.9965	0.99592
0.95318	0.91137	0.98906	0.99549	0.99874	0.9933	0.99892	0.98936	0.99923	0.99645	0.99687	0.99709	0.99507	0.99749	0.99986	0.99782	0.99624	0.99492
0.94275	0.89996	0.99178	0.9954	0.9985	0.99397	0.99922	0.99208	0.99936	0.99668	0.99722	0.99745	0.99604	0.99791	0.99992	0.99854	0.99625	0.94827
0.94971	0.90972	0.98399	0.99663	0.99929	0.99317	0.99852	0.98441	0.99912	0.99724	0.99753	0.99768	0.99309	0.99684	0.99982	0.99492	0.99713	0.95113
0.98926	0.96045	0.96183	0.99775	0.99859	0.99139	0.99792	0.96525	0.99855	0.99795	0.99794	0.99801	0.99286	0.99843	0.99938	0.97924	0.99819	0.99508
0.95659	0.91204	0.98974	0.99177	0.99645	0.989	0.99775	0.98975	0.99805	0.99285	0.99369	0.99406	0.9915	0.99562	0.9997	0.99767	0.99254	0.99122
0.96689	0.93144	0.97043	0.99564	0.99758	0.98919	0.99574	0.97047	0.99702	0.99573	0.99575	0.99586	0.99003	0.99333	0.99854	0.98383	0.99533	0.9908
0.96086	0.92445	0.96387	0.99793	0.99723	0.99197	0.99675	0.96476	0.99731	0.99797	0.99788	0.99791	0.99265	0.96385	0.99871	0.97839	0.9973	0.97495
0.95469	0.91635	0.95942	0.99803	0.99581	0.99255	0.99651	0.96024	0.99618	0.99789	0.99795	0.99795	0.99276	0.96737	0.9984	0.97375	0.99689	0.98034
0.95756	0.91952	0.96698	0.99791	0.99762	0.99208	0.997	0.96768	0.99762	0.99804	0.99795	0.998	0.99292	0.96179	0.99903	0.98098	0.99741	0.9737
0.96212	0.92465	0.97767	0.9948	0.99803	0.98888	0.99641	0.97767	0.99764	0.99524	0.99538	0.99555	0.99053	0.99395	0.9992	0.98996	0.99489	0.99088
0.95047	0.90995	0.98708	0.99418	0.99815	0.99062	0.99799	0.9872	0.99861	0.99519	0.99573	0.996	0.99306	0.9958	0.99981	0.99673	0.99485	0.95299
0.9417	0.89896	0.99212	0.99401	0.99769	0.9922	0.9988	0.99227	0.99897	0.99536	0.99606	0.99637	0.99473	0.9971	0.9999	0.99856	0.99483	0.94644
0.94132	0.89822	0.98541	0.99528	0.99851	0.99113	0.99774	0.98548	0.99849	0.99589	0.99632	0.99653	0.99327	0.9078	0.99976	0.99561	0.99565	0.95107
0.96254	0.92678	0.97755	0.99718	0.99918	0.99282	0.99815	0.97832	0.99886	0.9975	0.99765	0.99776	0.99431	0.9969	0.99966	0.99032	0.99748	0.96502
0.94405	0.90241	0.98764	0.99462	0.99818	0.99124	0.99794	0.98769	0.99848	0.99541	0.99585	0.9961	0.99347	0.91083	0.99974	0.99681	0.99523	0.94841
0.94711	0.9058	0.98707	0.99337	0.99744	0.98944	0.99728	0.98692	0.99785	0.9942	0.99468	0.99498	0.99173	0.91394	0.99963	0.99618	0.99393	0.94979
0.95508	0.91623	0.97487	0.99754	0.9987	0.99246	0.9977	0.97542	0.99848	0.9977	0.99782	0.99791	0.99389	0.9558	0.99961	0.98766	0.99744	0.96192
0.94139	0.89741	0.97128	0.99832	0.9979	0.99334	0.99745	0.97187	0.9978	0.99837	0.99835	0.9984	0.99415	0.90937	0.99935	0.98457	0.99584	0.97445
0.94564	0.90351	0.9796	0.99675	0.99876	0.99202	0.9975	0.97979	0.99841	0.997	0.99713	0.99725	0.99343	0.91381	0.99958	0.99146	0.99668	0.96233
0.95697	0.91468	0.98776	0.9937	0.99774	0.99052	0.99806	0.98775	0.99873	0.99504	0.99538	0.99566	0.99255	0.9956	0.9996	0.99761	0.9946	0.99267
0.94128	0.89075	0.99559	0.99514	0.99762	0.99463	0.99946	0.99557	0.99934	0.99629	0.99697	0.99721	0.99457	0.99819	0.99991	0.99799	0.99576	0.99622
0.94776	0.9019	0.9922	0.99468	0.99802	0.99323	0.99913	0.99233	0.99926	0.99594	0.99666	0.99692	0.99534	0.9976	0.99991	0.99874	0.99545	0.99524
0.9492	0.90831	0.98933	0.99346	0.99758	0.99073	0.99814	0.98951	0.99845	0.99455	0.9952	0.99551	0.99334	0.99638	0.99975	0.99744	0.99424	0.95196
0.96857	0.93065	0.9801	0.99363	0.99755	0.98824	0.99627	0.98009	0.99755	0.99404	0.99423	0.99444	0.98957	0.99413	0.99888	0.99227	0.99405	0.98997
0.96968	0.93309	0.97777	0.99485	0.99812	0.98929	0.99652	0.978	0.99781	0.99516	0.99526	0.99543	0.99045	0.99462	0.99889	0.99068	0.99507	0.99097
0.96325	0.92488	0.98277	0.9932	0.99746	0.98823	0.99669	0.98272	0.99769	0.99384	0.99417	0.99446	0.99022	0.99435	0.99934	0.99379	0.99364	0.9902
0.94802	0.90704	0.98891	0.99351	0.99763	0.99044	0.99794	0.98892	0.99836	0.99452	0.99515	0.99544	0.99286	0.99576	0.99976	0.99737	0.99428	0.95081
0.95599	0.90919	0.9903	0.99276	0.99707	0.99058	0.99844	0.99052	0.99872	0.99419	0.99498	0.9953	0.99311	0.99666	0.99979	0.9983	0.99375	0.99302
0.9513	0.90716	0.99092	0.9934	0.99741	0.99123	0.99857	0.99101	0.99877	0.99461	0.9954	0.99572	0.99363	0.99671	0.99984	0.99836	0.99416	0.99343
0.94365	0.89375	0.99468	0.99372	0.99689	0.99299	0.99913	0.99481	0.99895	0.99504	0.99588	0.99619	0.99292	0.99771	0.99984	0.99812	0.99636	0.99488
0.95644	0.9189	0.96011	0.99819	0.99612	0.9927	0.9967	0.96093	0.99645	0.99804	0.9981	0.9981	0.99301	0.92943	0.99855	0.97456	0.99732	0.97971
0.94291	0.90066	0.96008	0.99878	0.99574	0.99423	0.99735	0.96156	0.99616	0.99871	0.99876	0.99876	0.99452	0.96475	0.99867	0.97481	0.99258	0.9823
0.95356	0.91393	0.96739	0.99776	0.99742	0.99206	0.99679	0.96787	0.99736	0.99773	0.9977	0.99774	0.99276	0.96104	0.99889	0.98118	0.99703	0.9741
0.96289	0.91671	0.98939	0.99136	0.99589	0.98812	0.99756	0.98935	0.99807	0.99276	0.993	0.99332	0.99016	0.99518	0.99926	0.99834	0.99255	0.99066
0.94794	0.90697	0.98887	0.99557	0.99879	0.99347	0.99897	0.98928	0.9992	0.99652	0.99712	0.99734	0.99565	0.99779	0.99986	0.99733	0.99636	0.95236
0.95649	0.91736	0.98447	0.99558	0.99891	0.99191	0.99828	0.98486	0.99897	0.99633	0.99676	0.99695	0.99389	0.99655	0.99974	0.99533	0.99619	0.99394
0.94829	0.89974	0.99294	0.99527	0.99815	0.99444	0.99938	0.99306	0.99935	0.99652	0.99722	0.99744	0.99635	0.99825	0.99986	0.99839	0.99603	0.99626
0.94873	0.90026	0.99302	0.99447	0.99773	0.99354	0.99921	0.99315	0.9992	0.99585	0.99664	0.99689	0.99573	0.998	0.99987	0.99847	0.99531	0.99556
0.93943	0.89589	0.99802	0.99452	0.99611	0.99391	0.99939	0.99799	0.9991	0.9956	0.99593	0.99617	0.99385	0.99711	0.99975	0.99929	0.9948	0.99515
0.93975	0.89475	0.99766	0.99407	0.99597	0.99352	0.99937	0.99764	0.99901	0.99526	0.99573	0.99597	0.99345	0.99715	0.99982	0.99914	0.99446	0.99492
0.94108	0.89632	0.9975	0.99432	0.99621	0.99381	0.99941	0.9975	0.9991	0.9955	0.996	0.99625	0.99374	0.99738	0.99984	0.99906	0.99468	0.99524
0.96648	0.92145	0.98723	0.99029	0.99569	0.98667	0.99732	0.98737	0.99774	0.99201	0.99257	0.99301	0.9896	0.99532	0.9995	0.99685	0.99162	0.99009
0.98176	0.94476	0.97242	0.99271	0.99743	0.98504	0.9956	0.97288	0.99721	0.99411	0.99369	0.99396	0.9874	0.99489	0.99873	0.98652	0.99418	0.98984
0.98304	0.95107	0.95837	0.97918	0.98776	0.9645	0.98464	0.95733	0.98672	0.98025	0.97846	0.97883	0.96675	0.98408	0.9928	0.973	0.98165	0.97458
0.97285	0.9366	0.97489	0.97361	0.98339	0.96381	0.98777	0.97424	0.98598	0.97393	0.973	0.97379	0.96668	0.98219	0.99585	0.98546	0.97728	0.96925
0.97812	0.94604	0.9608	0.97371	0.98381	0.95857	0.9829	0.95963	0.98368	0.97512	0.97301	0.97363	0.96149	0.98006	0.99415	0.97327	0.97826	0.96843
0.97745	0.94581	0.95653	0.97127	0.98187	0.95448	0.98055	0.95529	0.98125	0.97262	0.97009	0.97069	0.95757	0.97787	0.99271	0.96954	0.97434	0.96616
0.95385	0.91451	0.98349	0.99528	0.99872	0.99113	0.99787	0.98374	0.99858	0.99602	0.9964	0.99662	0.99335	0.99599	0.99975	0.99434	0.99584	0.95645
0.95299	0.90539	0.99159	0.99403	0.99764	0.99247	0.99888	0.99186	0.99904	0.99519	0.99587	0.99614	0.99446	0.9974	0.99987	0.9986	0.99487	0.99424
0.95544	0.91388	0.98858	0.99401	0.99802	0.99131	0.99841	0.98871	0.99878	0.99513	0.99575	0.99602	0.99361	0.99667	0.99981	0.99744	0.99486	0.99344
0.95406	0.91469	0.98432	0.9953	0.99868	0.99135	0.99787	0.98456	0.99866	0.99596	0.9963	0.9965	0.99328	0.9959	0.99972	0.99508	0.99576	0.95645
0.94174	0.89673	0.99313	0.99556	0.99821	0.995	0.99935	0.99347	0.99897	0.99676	0.99727	0.99748	0.99689	0.9988	0.99966	0.99754	0.99649	0.99673
0.9447	0.90449	0.98873	0.9959	0.99867	0.99436	0.99898	0.98948	0.99875	0.99673	0.99716	0.99734	0.99637	0.99847	0.99948	0.99662	0.99689	0.95029
0.96321	0.92561	0.98179	0.99531	0.99857	0.99093	0.99753	0.98203	0.9984	0.99577	0.99603	0.99622	0.99239	0.99569	0.99945	0.99348	0.9957	0.99244
0.96717	0.93135	0.97417	0.99488	0.9978	0.98842	0.99593	0.97421	0.99727	0.99523	0.99526	0.99543	0.98979	0.99362	0.9989	0.98705	0.9949	0.99042
0.96045	0.92194	0.98297	0.99385	0.99786	0.98908	0.99705	0.98293	0.99799	0.99465	0.99493	0.9952	0.99112	0.99459	0.99945	0.99408	0.99436	0.99114
0.95347	0.91301	0.98751	0.99522	0.99875	0.99242	0.99867	0.98777	0.99914	0.99627	0.99675	0.99698	0.99456	0.99706	0.99986	0.99707	0.996	0.9945
0.95512	0.91536	0.98623	0.99246	0.99697	0.98827	0.99692	0.98606	0.9976	0.99329	0.99383	0.99415	0.99059	0.99421	0.99955	0.99561	0.99298	0.99027
0.94727	0.90573	0.99052	0.99236	0.99683	0.98969	0.99794	0.99048	0.99811	0.99361	0.9944	0.99476	0.99252	0.99578	0.99974	0.99769	0.99321	0.94984
0.95983	0.92352	0.96152	0.99837	0.99666	0.99264	0.99703	0.96255	0.99692	0.99837	0.99832	0.99833	0.99319	0.96692	0.99888	0.97598	0.99761	0.97877
0.94853	0.9084	0.96379	0.99926	0.99695	0.9946	0.998	0.96535	0.99716	0.99926	0.99925	0.99925	0.99529	0.96649	0.99932	0.97832	0.99723	0.98004
0.96189	0.92563	0.96199	0.99748	0.99671	0.99121	0.99618	0.96268	0.99681	0.99744	0.99737	0.9974	0.99173	0.96474	0.99834	0.97638	0.99668	0.97561
0.95793	0.91959	0.96369	0.99701	0.99651	0.99077	0.99587	0.96393	0.99651	0.99692	0.9969	0.99694	0.9912	0.96363	0.99837	0.97744	0.99612	0.97559
0.96348	0.92656	0.98112	0.99674	0.99934	0.99303	0.99841	0.98186	0.9991	0.99724	0.99742	0.99757	0.99453	0.99728	0.99971	0.99324	0.99723	0.99464
0.95732	0.91837	0.98288	0.99408	0.99795	0.98921	0.99702	0.98291	0.99798	0.99481	0.99513	0.99538	0.99129	0.99455	0.99951	0.99396	0.99452	0.99129
0.94958	0.90856	0.98332	0.99481	0.99831	0.9901	0.99734	0.98339	0.99819	0.99547	0.99587	0.9961	0.99235	0.91738	0.99969	0.99409	0.9952	0.95298
0.95338	0.91358	0.98452	0.99445	0.99825	0.9901	0.99755	0.98468	0.99842	0.99533	0.9957	0.99593	0.99244	0.99527	0.99972	0.99518	0.99502	0.95534
0.95833	0.91908	0.98441	0.99182	0.99658	0.9869	0.99636	0.98421	0.99725	0.99282	0.99324	0.99359	0.98924	0.99322	0.99939	0.99468	0.99244	0.98928
0.94691	0.90489	0.98113	0.99599	0.99876	0.99112	0.9975	0.98132	0.99841	0.99646	0.99676	0.99693	0.99319	0.91473	0.99971	0.99247	0.99618	0.95911
0.93274	0.8881	0.98875	0.9952	0.9985	0.99202	0.99823	0.98882	0.99879	0.99601	0.99651	0.99675	0.99437	0.89793	0.99987	0.99752	0.99574	0.9941
0.94048	0.89755	0.98595	0.99605	0.99901	0.99251	0.99835	0.98616	0.99899	0.99679	0.99718	0.99736	0.99451	0.90691	0.99983	0.99616	0.99656	0.9468
0.94655	0.90482	0.98952	0.99477	0.99833	0.99227	0.99862	0.98959	0.99912	0.99611	0.99658	0.99682	0.99442	0.99637	0.99983	0.99829	0.99565	0.95031
0.93647	0.88824	0.99561	0.99306	0.99634	0.9924	0.99902	0.99561	0.99874	0.99459	0.9954	0.99575	0.99231	0.99735	0.99987	0.99773	0.99385	0.99447
0.96249	0.92554	0.96964	0.99649	0.99777	0.99004	0.99626	0.96988	0.99744	0.99671	0.99668	0.99677	0.99122	0.99414	0.99904	0.98299	0.9962	0.96977
0.96572	0.92918	0.97176	0.99411	0.99692	0.98707	0.99495	0.97147	0.99627	0.99433	0.99437	0.99453	0.98832	0.99201	0.99855	0.98439	0.99391	0.98896
0.95616	0.91678	0.98547	0.99452	0.99845	0.99083	0.99805	0.98574	0.99873	0.99553	0.99602	0.99628	0.99328	0.99621	0.99981	0.99578	0.99524	0.99319
0.9435	0.90103	0.99159	0.9943	0.99792	0.99269	0.99892	0.99189	0.99896	0.99566	0.99635	0.99664	0.99516	0.99756	0.99981	0.99817	0.9952	0.94824
0.93696	0.89417	0.99186	0.99362	0.99757	0.99163	0.9986	0.99198	0.9987	0.99504	0.99582	0.99615	0.99448	0.9018	0.99983	0.99833	0.99459	0.94226
0.95502	0.91522	0.96774	0.99713	0.99729	0.99089	0.99635	0.96799	0.99717	0.99716	0.9971	0.99716	0.99179	0.96091	0.99888	0.98109	0.99645	0.97345
0.9547	0.91496	0.98672	0.99208	0.99684	0.98808	0.99705	0.98654	0.99757	0.99298	0.99372	0.99408	0.99077	0.99452	0.99963	0.99556	0.99264	0.99031
0.95162	0.90852	0.99008	0.99283	0.99713	0.99074	0.99838	0.99052	0.99851	0.99413	0.99506	0.99541	0.99358	0.99684	0.9997	0.99759	0.99367	0.99317
0.94896	0.90442	0.99151	0.99264	0.99686	0.99092	0.99856	0.99178	0.9985	0.99404	0.9951	0.99546	0.99391	0.99708	0.99968	0.99781	0.99347	0.99353
0.95644	0.91018	0.9891	0.99392	0.99778	0.99162	0.99861	0.98934	0.9989	0.9953	0.99616	0.99646	0.99427	0.99735	0.99955	0.99741	0.99482	0.99466
0.96522	0.93102	0.96381	0.99801	0.99742	0.9923	0.99688	0.96475	0.99748	0.99803	0.99796	0.99799	0.99281	0.99524	0.99861	0.97868	0.99743	0.97377
0.96727	0.93226	0.96361	0.99602	0.99665	0.98888	0.99515	0.9637	0.99636	0.996	0.99591	0.99598	0.98954	0.99287	0.99812	0.97742	0.99535	0.97241
0.95341	0.91479	0.97538	0.99836	0.99916	0.99399	0.99852	0.97673	0.99902	0.99866	0.99881	0.99891	0.99576	0.99744	0.99974	0.98842	0.99858	0.96036
0.9645	0.92881	0.97266	0.99727	0.99874	0.99172	0.99762	0.9732	0.99849	0.99765	0.99764	0.99774	0.99322	0.99589	0.99942	0.98607	0.99733	0.96669
0.93317	0.88693	0.99574	0.99219	0.99564	0.99154	0.9988	0.99575	0.99827	0.99394	0.9948	0.9952	0.99438	0.99722	0.99967	0.99693	0.99308	0.99409
0.93052	0.88695	0.99252	0.99513	0.99832	0.99367	0.99905	0.99272	0.99911	0.99633	0.99697	0.99723	0.99597	0.89511	0.99982	0.99851	0.99605	0.93794
0.94066	0.89795	0.99254	0.99356	0.99733	0.99184	0.99869	0.99265	0.99873	0.99498	0.99567	0.99598	0.99448	0.99702	0.99982	0.99838	0.99444	0.94539
0.94435	0.90217	0.98349	0.99615	0.99903	0.99192	0.99805	0.98381	0.9988	0.99676	0.99711	0.99729	0.99413	0.91169	0.99981	0.9944	0.99655	0.95486
0.96009	0.92213	0.97682	0.99582	0.99857	0.99001	0.99705	0.97706	0.99813	0.99627	0.99642	0.99661	0.99192	0.9949	0.9995	0.98918	0.99593	0.96185
0.95663	0.91739	0.98144	0.99422	0.99795	0.98901	0.99685	0.98143	0.99785	0.99495	0.99526	0.99549	0.99107	0.99416	0.99949	0.99276	0.99462	0.95764
0.96484	0.93013	0.96488	0.9976	0.99747	0.99179	0.9965	0.96566	0.9974	0.9976	0.99752	0.99755	0.99218	0.99462	0.99832	0.9797	0.99699	0.97149
0.96722	0.93251	0.96144	0.99631	0.9965	0.9891	0.99519	0.96191	0.99634	0.99642	0.99623	0.99629	0.98982	0.9932	0.99796	0.97579	0.99574	0.97359
0.96724	0.93237	0.9616	0.99616	0.9964	0.98891	0.99505	0.96189	0.99622	0.9962	0.99604	0.99611	0.98954	0.99295	0.99797	0.97565	0.99551	0.97098
0.97775	0.94742	0.95541	0.99278	0.99429	0.98347	0.99164	0.95522	0.99349	0.9929	0.99244	0.99255	0.98386	0.99001	0.99623	0.96954	0.99245	0.98695
0.97489	0.9421	0.97041	0.98452	0.99086	0.97498	0.98926	0.96943	0.99059	0.98428	0.98419	0.98461	0.97584	0.98526	0.99689	0.98191	0.98501	0.97757
0.95093	0.90585	0.99349	0.98557	0.99042	0.98446	0.99717	0.99319	0.99561	0.98711	0.98869	0.9894	0.98768	0.99348	0.99955	0.99634	0.9859	0.98725
0.96068	0.91469	0.99145	0.99172	0.99561	0.98892	0.99746	0.99124	0.99782	0.9923	0.99252	0.99282	0.98982	0.99473	0.99911	0.9989	0.99255	0.9901
0.97321	0.93918	0.97237	0.9968	0.999	0.991	0.99772	0.97336	0.99875	0.99775	0.99755	0.99769	0.99299	0.99676	0.99927	0.98636	0.99751	0.99447
0.93944	0.89583	0.99336	0.99386	0.99747	0.99264	0.99896	0.99345	0.99899	0.99533	0.99614	0.99644	0.99512	0.99735	0.99991	0.99863	0.99479	0.94481
0.94651	0.90247	0.99202	0.99406	0.99775	0.99236	0.99887	0.99205	0.99911	0.99549	0.9962	0.99648	0.99468	0.99701	0.99992	0.99885	0.99496	0.99455
0.98238	0.9536	0.96256	0.99681	0.99795	0.9892	0.99643	0.96378	0.99776	0.99716	0.99698	0.99708	0.99059	0.99602	0.999	0.97769	0.99696	0.99277
0.96671	0.93028	0.97783	0.99431	0.99797	0.98828	0.9964	0.97785	0.99765	0.99488	0.995	0.99524	0.99016	0.9942	0.9992	0.99012	0.9946	0.99059
0.94677	0.9022	0.99242	0.99237	0.99655	0.99067	0.9985	0.99255	0.99843	0.99382	0.99475	0.99512	0.99348	0.99671	0.99979	0.99815	0.99317	0.99312
0.95654	0.9162	0.98739	0.99219	0.99701	0.98863	0.99752	0.98738	0.99796	0.99329	0.9941	0.99448	0.99141	0.99528	0.99972	0.99638	0.9929	0.99111
0.96225	0.92441	0.98165	0.99321	0.99759	0.98778	0.99664	0.9816	0.99765	0.99399	0.99438	0.99468	0.99025	0.99423	0.9995	0.99272	0.99366	0.99024
0.93949	0.88903	0.99561	0.99289	0.99608	0.99238	0.99903	0.99571	0.9987	0.99437	0.99532	0.99567	0.99229	0.99738	0.99986	0.9983	0.99351	0.99439
0.93898	0.89125	0.99513	0.99185	0.99553	0.99083	0.9987	0.99504	0.99833	0.99342	0.99436	0.99476	0.99073	0.99662	0.99984	0.99826	0.99256	0.99315
0.9375	0.88922	0.99532	0.99451	0.99736	0.99401	0.99932	0.99538	0.99912	0.99591	0.9966	0.99686	0.99395	0.99804	0.99988	0.99839	0.9953	0.99581
0.94274	0.89291	0.99468	0.99531	0.99785	0.99466	0.99945	0.99481	0.99932	0.99644	0.99707	0.9973	0.9946	0.9983	0.99987	0.99813	0.99595	0.99626
0.947	0.89734	0.99445	0.99487	0.99757	0.9941	0.99935	0.99448	0.99933	0.99614	0.99687	0.99712	0.99403	0.99802	0.99984	0.99856	0.99547	0.99597
0.97884	0.95253	0.95607	0.99917	0.99687	0.99348	0.99795	0.95869	0.9974	0.99921	0.99913	0.99914	0.9942	0.9737	0.99913	0.97251	0.99881	0.99638
0.95601	0.91828	0.95787	0.99833	0.99581	0.99245	0.99671	0.95931	0.99628	0.99833	0.99828	0.99828	0.993	0.96823	0.99855	0.97269	0.99735	0.98098
0.94339	0.90096	0.96156	0.999	0.99609	0.99422	0.99749	0.963	0.99642	0.99899	0.99899	0.99899	0.99472	0.96866	0.99905	0.97601	0.99255	0.98248
0.96341	0.92879	0.95185	0.997	0.99442	0.9902	0.99506	0.95292	0.99504	0.99694	0.99686	0.99686	0.99048	0.97072	0.99745	0.96665	0.99601	0.98135
0.97339	0.9403	0.96486	0.99174	0.99467	0.98335	0.99203	0.96419	0.99368	0.99145	0.99142	0.99158	0.98366	0.989	0.99703	0.97778	0.99116	0.9851
0.95891	0.92196	0.95808	0.99803	0.99596	0.99174	0.99638	0.95933	0.99637	0.99807	0.99796	0.99797	0.99239	0.96803	0.99848	0.97279	0.99729	0.97999
0.96609	0.93144	0.95692	0.99642	0.99552	0.98919	0.99485	0.95748	0.99568	0.99643	0.99621	0.99625	0.98967	0.99293	0.99756	0.97138	0.99561	0.97215
0.96029	0.91802	0.98752	0.989	0.99466	0.98509	0.9963	0.98715	0.99657	0.98994	0.99087	0.99132	0.9878	0.99316	0.99942	0.99582	0.98974	0.98742
0.95681	0.91441	0.98817	0.99371	0.99783	0.99074	0.99829	0.98821	0.99886	0.99515	0.99559	0.99589	0.99304	0.99607	0.99974	0.99772	0.99466	0.99311
0.95461	0.91454	0.97538	0.99599	0.99807	0.99003	0.9965	0.97544	0.9976	0.99616	0.99626	0.99639	0.99143	0.95371	0.99927	0.98777	0.99568	0.96495
0.98249	0.95751	0.95339	0.99907	0.99661	0.99328	0.99778	0.95716	0.99745	0.99936	0.99908	0.9991	0.99408	0.99829	0.99886	0.97101	0.99905	0.99719
0.94381	0.90118	0.97524	0.99832	0.99874	0.99368	0.99807	0.97598	0.99854	0.99848	0.99853	0.99859	0.99501	0.91229	0.99972	0.98804	0.99791	0.97024
0.9376	0.89249	0.97002	0.99877	0.99761	0.99395	0.99761	0.97086	0.99757	0.99878	0.99876	0.99878	0.99477	0.90504	0.99942	0.98347	0.99366	0.97739
0.93938	0.89489	0.96512	0.9985	0.99652	0.99355	0.99709	0.96597	0.99667	0.99841	0.99846	0.99846	0.99403	0.90761	0.99896	0.97901	0.99245	0.98029
0.9637	0.93214	0.94815	0.99836	0.99343	0.99331	0.99666	0.95057	0.99462	0.99833	0.99834	0.99834	0.99335	0.97636	0.99812	0.96404	0.99731	0.98718
0.98055	0.94421	0.97089	0.99136	0.9967	0.98307	0.99501	0.97102	0.99667	0.99393	0.99286	0.99319	0.98648	0.99396	0.99813	0.9851	0.99357	0.98939
0.95423	0.91463	0.98694	0.99408	0.99805	0.99101	0.9981	0.98736	0.99846	0.99503	0.99559	0.99588	0.99352	0.99663	0.99966	0.99616	0.99483	0.99314
0.96293	0.92588	0.97416	0.99559	0.99807	0.98929	0.9963	0.9742	0.99755	0.99584	0.99594	0.9961	0.99077	0.99404	0.99918	0.98678	0.99546	0.96372
0.93459	0.88324	0.99679	0.99343	0.99596	0.99325	0.99925	0.99686	0.99879	0.99493	0.99582	0.99615	0.99317	0.99781	0.9998	0.99607	0.99387	0.99522
0.9327	0.88139	0.99719	0.99253	0.99531	0.9924	0.99909	0.99721	0.99851	0.994	0.99496	0.9953	0.99231	0.99734	0.99982	0.99829	0.99311	0.99431
0.97858	0.9514	0.95336	0.99806	0.99613	0.9912	0.99635	0.95518	0.99663	0.99814	0.99796	0.99798	0.99164	0.99611	0.99824	0.96932	0.99756	0.99444
0.96447	0.92772	0.96825	0.99489	0.99664	0.98787	0.99467	0.96807	0.99606	0.9949	0.99478	0.99488	0.98846	0.99179	0.99803	0.98156	0.99432	0.96728
0.96132	0.92326	0.97563	0.99401	0.99711	0.98765	0.99534	0.97538	0.99663	0.99422	0.99438	0.99456	0.98887	0.99221	0.99876	0.98785	0.99385	0.96133
0.96186	0.92408	0.97082	0.9952	0.99715	0.98854	0.99532	0.97066	0.99657	0.99523	0.99528	0.9954	0.98944	0.9924	0.99857	0.98368	0.9947	0.96675
0.95195	0.91245	0.95905	0.99783	0.99549	0.99242	0.99628	0.95977	0.99589	0.99766	0.99773	0.99773	0.99255	0.96694	0.99819	0.97332	0.99609	0.98063
0.94756	0.90527	0.96427	0.99779	0.9965	0.99201	0.99642	0.96477	0.99663	0.99768	0.99768	0.9977	0.99257	0.96293	0.99865	0.97802	0.99566	0.97787
0.96125	0.9247	0.9611	0.99728	0.99627	0.99095	0.99585	0.96151	0.9964	0.99714	0.99715	0.99717	0.99129	0.96586	0.99829	0.97518	0.99632	0.97706
0.95824	0.92135	0.95303	0.99699	0.99414	0.99086	0.99507	0.95363	0.99477	0.99675	0.99685	0.99684	0.9908	0.97025	0.99745	0.96731	0.99572	0.98197
0.95199	0.91194	0.96437	0.99839	0.997	0.99276	0.99714	0.96529	0.99716	0.99846	0.99837	0.9984	0.99349	0.96416	0.99907	0.97841	0.99749	0.97798
0.96381	0.92919	0.9506	0.99616	0.99373	0.98927	0.99411	0.95117	0.99429	0.99596	0.99595	0.99595	0.98918	0.97046	0.9968	0.96499	0.99488	0.98092
0.97404	0.93885	0.97547	0.99669	0.99928	0.99158	0.99802	0.97633	0.99898	0.99737	0.9974	0.99755	0.99325	0.99704	0.99948	0.98919	0.99728	0.99417
0.96176	0.92368	0.98043	0.9952	0.99851	0.99017	0.99732	0.9807	0.99845	0.99612	0.99616	0.99634	0.99199	0.99508	0.99931	0.99285	0.99579	0.99259
0.96057	0.92161	0.98302	0.99376	0.99778	0.98898	0.99706	0.98305	0.99808	0.99479	0.99497	0.99524	0.99092	0.99441	0.99936	0.99446	0.99443	0.99131
0.92979	0.87969	0.99818	0.99477	0.99643	0.99473	0.99956	0.9982	0.9991	0.99592	0.99659	0.99685	0.99467	0.99817	0.99988	0.99848	0.99504	0.99616
0.92696	0.87894	0.99864	0.99533	0.9966	0.99538	0.99962	0.99864	0.99911	0.99632	0.99692	0.99716	0.99533	0.99837	0.99981	0.99837	0.99547	0.99663
0.92322	0.87601	0.99905	0.99597	0.99709	0.99595	0.99969	0.99905	0.99929	0.99678	0.99733	0.99753	0.9959	0.99827	0.99986	0.99872	0.99616	0.99701
0.9674	0.9281	0.97956	0.99222	0.99594	0.98657	0.99474	0.97926	0.99618	0.99245	0.9923	0.99252	0.98701	0.99142	0.99752	0.99207	0.99259	0.9878
0.95587	0.91763	0.97649	0.99762	0.99923	0.99303	0.99826	0.97766	0.99909	0.99831	0.9983	0.99842	0.99489	0.99684	0.99947	0.98949	0.99806	0.95859
0.96618	0.9291	0.97854	0.99173	0.99626	0.98529	0.99498	0.97828	0.99639	0.99255	0.99259	0.99288	0.98711	0.99197	0.99872	0.99051	0.99229	0.98778
0.9584	0.91936	0.98318	0.99583	0.99902	0.99196	0.9983	0.98362	0.99912	0.99689	0.99714	0.99733	0.99403	0.99655	0.99962	0.99471	0.99658	0.99451
0.97035	0.93193	0.98076	0.99646	0.99933	0.99276	0.99846	0.98165	0.99912	0.99693	0.99716	0.9973	0.99415	0.99753	0.99967	0.99346	0.99704	0.99437
0.95657	0.91626	0.98627	0.99417	0.99808	0.99048	0.99783	0.98645	0.99865	0.99519	0.99559	0.99584	0.99256	0.99564	0.99967	0.99666	0.99492	0.99263
0.95498	0.91438	0.98694	0.99456	0.99833	0.9912	0.9982	0.98702	0.99888	0.99578	0.99614	0.99638	0.9933	0.99591	0.9997	0.99706	0.9954	0.99344
0.94733	0.90522	0.99035	0.99434	0.99808	0.99193	0.99865	0.99041	0.99904	0.99559	0.9962	0.99647	0.99419	0.99657	0.9999	0.99849	0.99515	0.99412
0.94393	0.89551	0.99635	0.99395	0.99643	0.9929	0.99913	0.99633	0.99912	0.99526	0.99556	0.99582	0.99431	0.99676	0.99973	0.99945	0.99465	0.99447
0.95043	0.9091	0.98917	0.99429	0.99813	0.99155	0.99845	0.98924	0.99888	0.9954	0.99598	0.99626	0.99377	0.99642	0.99984	0.99786	0.99506	0.99363
0.94119	0.89631	0.9937	0.99389	0.9974	0.99282	0.999	0.99376	0.999	0.99534	0.99608	0.99638	0.99512	0.99743	0.9999	0.99858	0.99657	0.99486
0.93816	0.89545	0.9905	0.99493	0.9984	0.99258	0.9987	0.99064	0.9991	0.99605	0.99665	0.99691	0.995	0.90345	0.99993	0.99834	0.99568	0.94389
0.94361	0.90148	0.99066	0.99493	0.99841	0.99286	0.99888	0.99079	0.99921	0.99613	0.99676	0.997	0.99278	0.99703	0.99993	0.99851	0.99576	0.94828
0.93531	0.88445	0.99714	0.99495	0.99705	0.99464	0.9995	0.9971	0.99924	0.99605	0.99673	0.99697	0.99458	0.99812	0.9999	0.99853	0.99541	0.99614
0.98219	0.94409	0.97018	0.98781	0.99391	0.97827	0.99203	0.96974	0.99402	0.98937	0.98813	0.98844	0.9801	0.99077	0.99632	0.98491	0.99023	0.98412
0.97956	0.94087	0.9735	0.98908	0.99504	0.98064	0.99374	0.97319	0.99532	0.99083	0.99004	0.99037	0.9831	0.99189	0.99779	0.98716	0.99108	0.9858
0.97941	0.94973	0.95891	0.99664	0.99728	0.98882	0.99604	0.96052	0.99728	0.99762	0.99694	0.99703	0.99049	0.99564	0.99808	0.97456	0.99725	0.9936
0.94381	0.90075	0.97851	0.9968	0.99854	0.99184	0.99724	0.9787	0.99819	0.99697	0.99712	0.99723	0.99329	0.91167	0.99952	0.99038	0.99664	0.96546
0.94313	0.90049	0.98274	0.99625	0.99891	0.99193	0.99778	0.98296	0.99861	0.99673	0.99698	0.99715	0.99384	0.9105	0.99975	0.99378	0.99649	0.95754
0.93851	0.89595	0.99071	0.99462	0.99821	0.99225	0.99863	0.99085	0.99897	0.9958	0.99637	0.99665	0.99475	0.90384	0.9999	0.99829	0.99543	0.94401
0.94768	0.9002	0.99251	0.99534	0.99826	0.99415	0.99928	0.99266	0.99945	0.99658	0.99723	0.99746	0.9961	0.99792	0.99988	0.99875	0.99609	0.99608
0.93494	0.88458	0.99772	0.99523	0.99703	0.99485	0.99961	0.99766	0.99939	0.99627	0.99682	0.99706	0.9948	0.99784	0.99991	0.99898	0.99559	0.9961
0.93403	0.88525	0.9981	0.99501	0.99668	0.99453	0.99954	0.99807	0.99932	0.99591	0.99641	0.99665	0.99447	0.99745	0.99988	0.99921	0.99527	0.99566
0.93138	0.88806	0.99882	0.99521	0.99648	0.9949	0.99962	0.9988	0.99922	0.99604	0.99651	0.99673	0.99485	0.99764	0.99986	0.99912	0.99537	0.99601
0.95687	0.91672	0.98678	0.99552	0.99877	0.99277	0.99852	0.98733	0.999	0.99618	0.99653	0.99674	0.99446	0.99725	0.99975	0.99671	0.99618	0.99424
0.94878	0.90753	0.98967	0.99354	0.99764	0.99087	0.99825	0.98983	0.99856	0.99464	0.99534	0.99566	0.9934	0.99639	0.99981	0.99773	0.99431	0.99308
0.94933	0.90848	0.98682	0.9932	0.99737	0.98916	0.99719	0.9867	0.99792	0.99402	0.99453	0.99482	0.99156	0.99452	0.99965	0.99607	0.9937	0.95137
0.95698	0.91738	0.98506	0.99473	0.9985	0.99087	0.99802	0.98523	0.9988	0.99578	0.99614	0.99638	0.99305	0.99592	0.99971	0.9958	0.99541	0.99315
0.9454	0.90415	0.98784	0.99562	0.99893	0.99279	0.99871	0.98812	0.99921	0.99667	0.99712	0.99734	0.99494	0.99685	0.9999	0.99731	0.99639	0.95006
0.95114	0.91038	0.98219	0.99489	0.99832	0.98991	0.99721	0.98222	0.99812	0.99552	0.9959	0.99612	0.99214	0.99474	0.99966	0.99321	0.99521	0.95425
0.95029	0.91035	0.9849	0.99648	0.99937	0.99325	0.99874	0.9854	0.99934	0.9973	0.99768	0.99785	0.99526	0.99715	0.99986	0.99558	0.99713	0.95465
0.95043	0.91001	0.98652	0.99473	0.99846	0.99118	0.99809	0.98671	0.99879	0.99572	0.99617	0.99642	0.99353	0.99603	0.99982	0.99651	0.99537	0.95332
0.93861	0.89088	0.99511	0.99367	0.99694	0.99286	0.99906	0.99509	0.99899	0.99505	0.99582	0.99611	0.99497	0.99728	0.99993	0.99843	0.99447	0.99469
0.93897	0.88784	0.99606	0.99346	0.99647	0.99257	0.99902	0.99597	0.99892	0.99453	0.99519	0.99546	0.99249	0.99675	0.99992	0.99813	0.99412	0.99389
0.96455	0.92939	0.97786	0.99837	0.99957	0.99537	0.99922	0.97933	0.9994	0.99882	0.99892	0.99899	0.99669	0.99863	0.99984	0.99097	0.99891	0.99702
0.95424	0.91593	0.98012	0.99786	0.99962	0.99431	0.99887	0.98101	0.99943	0.99838	0.99856	0.99866	0.99584	0.99748	0.99981	0.99244	0.99828	0.95922
0.9645	0.92613	0.9816	0.99309	0.99729	0.98782	0.99642	0.98149	0.99752	0.99395	0.99405	0.99433	0.98958	0.99365	0.99909	0.99323	0.99364	0.98995
0.95623	0.91534	0.98774	0.99144	0.99644	0.98767	0.99716	0.98764	0.99774	0.99259	0.99342	0.99381	0.99055	0.99459	0.99967	0.99653	0.99223	0.9903
0.94936	0.90383	0.9922	0.99086	0.99552	0.98889	0.99797	0.99212	0.99788	0.99225	0.99334	0.99377	0.99178	0.99564	0.99976	0.99802	0.99158	0.99136
0.93315	0.88346	0.9973	0.99348	0.99575	0.99356	0.99925	0.99738	0.99853	0.99495	0.99582	0.99613	0.99349	0.99813	0.99961	0.99769	0.99395	0.99545
0.92695	0.87813	0.99847	0.9955	0.99684	0.99557	0.9996	0.99849	0.99907	0.99658	0.99721	0.99742	0.99552	0.9985	0.99974	0.99805	0.99575	0.99694
0.92337	0.87441	0.99881	0.99629	0.99735	0.99635	0.99968	0.9988	0.99923	0.99718	0.99768	0.99786	0.99631	0.99865	0.99977	0.9982	0.9965	0.99746
0.95049	0.90197	0.99256	0.99251	0.99629	0.99025	0.99811	0.9924	0.9984	0.99357	0.99409	0.99441	0.99196	0.9953	0.99965	0.99911	0.99312	0.99188
0.94258	0.89247	0.99488	0.99367	0.99677	0.99251	0.99908	0.99491	0.99906	0.99495	0.99567	0.99596	0.99243	0.99705	0.99993	0.99877	0.99431	0.99437
0.97634	0.93505	0.97691	0.99084	0.99582	0.9838	0.99469	0.97684	0.99634	0.99224	0.99162	0.99187	0.98564	0.99281	0.99768	0.99079	0.99241	0.98771
0.95334	0.9051	0.99145	0.99367	0.99736	0.99201	0.99881	0.99153	0.99888	0.99502	0.99599	0.9963	0.99465	0.99757	0.99959	0.99805	0.99449	0.99479
0.96065	0.91599	0.9905	0.9863	0.99224	0.9836	0.99674	0.99037	0.99631	0.98857	0.98951	0.99015	0.98736	0.99376	0.99943	0.99695	0.98757	0.98756
0.97178	0.93754	0.97238	0.9893	0.99398	0.98134	0.99202	0.97163	0.99349	0.98905	0.98917	0.98948	0.98205	0.98831	0.99762	0.98415	0.98917	0.98281
0.96932	0.93446	0.96533	0.9939	0.99591	0.98618	0.9937	0.96503	0.99518	0.9939	0.9938	0.99391	0.98683	0.99086	0.99751	0.97875	0.99339	0.98815
0.97007	0.93665	0.95933	0.99599	0.99606	0.98836	0.99473	0.95965	0.99594	0.99606	0.99583	0.99588	0.98899	0.99287	0.99773	0.97361	0.99536	0.99098
0.97776	0.94891	0.95353	0.99681	0.996	0.98878	0.99525	0.95497	0.99623	0.99719	0.9967	0.99674	0.9897	0.99471	0.99764	0.9691	0.99664	0.99295
0.96948	0.93628	0.96403	0.99775	0.99785	0.9911	0.99699	0.96545	0.99786	0.99822	0.9979	0.99797	0.99247	0.99589	0.99896	0.9789	0.99774	0.97209
0.95181	0.91157	0.97434	0.99759	0.99869	0.99231	0.9976	0.97501	0.99848	0.99788	0.99788	0.99798	0.99372	0.95522	0.99959	0.98742	0.99749	0.96787
0.96181	0.91964	0.98613	0.99204	0.9967	0.98792	0.99711	0.98596	0.99788	0.99338	0.99365	0.99396	0.9901	0.99426	0.99932	0.99642	0.99302	0.99035
0.97216	0.93843	0.97253	0.9972	0.99891	0.99175	0.99748	0.97319	0.99857	0.99744	0.99742	0.99751	0.99276	0.99614	0.99916	0.98657	0.99725	0.99367
0.96595	0.92924	0.97758	0.99406	0.99753	0.98801	0.99589	0.97749	0.99723	0.99448	0.9945	0.99472	0.98943	0.99332	0.99883	0.98999	0.99419	0.98986
0.95888	0.91841	0.98662	0.98907	0.99467	0.98471	0.99581	0.98619	0.99628	0.98978	0.99071	0.99116	0.98727	0.99244	0.99932	0.99515	0.98961	0.98685
0.93464	0.88515	0.99597	0.99431	0.99695	0.99389	0.9993	0.99601	0.99896	0.99572	0.99641	0.9967	0.99383	0.99816	0.99979	0.99717	0.99499	0.9958
0.92969	0.88069	0.9965	0.99478	0.99717	0.99465	0.99943	0.99661	0.99901	0.99624	0.99685	0.99711	0.99661	0.99842	0.99977	0.99806	0.99551	0.99643
0.94998	0.90932	0.98634	0.99505	0.99855	0.9915	0.9981	0.98649	0.99887	0.99601	0.99635	0.99659	0.99354	0.99578	0.99975	0.9966	0.99565	0.95301
0.95215	0.91184	0.98592	0.99414	0.99814	0.99017	0.99778	0.98602	0.99855	0.99522	0.99567	0.99595	0.99262	0.9954	0.99975	0.99614	0.9948	0.95416
0.96187	0.92387	0.98041	0.99123	0.99567	0.98525	0.9947	0.97994	0.99584	0.99145	0.99176	0.99207	0.9866	0.9909	0.99864	0.99138	0.99129	0.98659
0.95166	0.90832	0.99058	0.9913	0.99607	0.98855	0.99772	0.99045	0.99799	0.99269	0.99357	0.99398	0.99132	0.99504	0.99976	0.99796	0.99208	0.99108
0.94583	0.90163	0.99222	0.9943	0.99784	0.99265	0.99894	0.99223	0.99918	0.99571	0.99636	0.99664	0.99479	0.99696	0.99992	0.99902	0.99515	0.9947
0.96743	0.93152	0.97704	0.99484	0.99796	0.9891	0.99625	0.9771	0.99752	0.99502	0.99515	0.99534	0.9903	0.99418	0.99892	0.98951	0.99486	0.99059
0.96514	0.92677	0.98247	0.99168	0.99651	0.98637	0.99597	0.98222	0.997	0.9923	0.99278	0.99309	0.98846	0.99335	0.99917	0.99315	0.99223	0.98848
0.95585	0.91193	0.98947	0.99236	0.99695	0.98964	0.99809	0.98955	0.99849	0.9938	0.99455	0.99489	0.99232	0.99596	0.99977	0.99797	0.99334	0.99219
0.9431	0.89386	0.99594	0.99393	0.99661	0.99352	0.99927	0.99593	0.99904	0.99527	0.99611	0.99638	0.99549	0.99783	0.99986	0.99848	0.99447	0.99532
0.93734	0.88936	0.99717	0.99576	0.99744	0.99566	0.9996	0.99722	0.99926	0.9968	0.99738	0.99759	0.99561	0.99856	0.99978	0.99804	0.99611	0.99699
0.93702	0.88771	0.99691	0.99552	0.99739	0.99549	0.99956	0.99695	0.99918	0.9967	0.99732	0.99754	0.99544	0.99857	0.99976	0.9979	0.99598	0.99692
0.9496	0.90313	0.99214	0.99322	0.9971	0.99162	0.99877	0.99231	0.99887	0.99466	0.99547	0.99581	0.99412	0.99711	0.99989	0.99855	0.99406	0.99389
0.9545	0.90585	0.99227	0.99224	0.99622	0.99047	0.99856	0.99229	0.99872	0.99416	0.99472	0.99506	0.9929	0.99641	0.99969	0.99898	0.99332	0.99319
0.94628	0.8964	0.99425	0.99486	0.99755	0.99405	0.99927	0.99437	0.99926	0.99612	0.9969	0.99716	0.99398	0.99797	0.99976	0.99834	0.99548	0.99604
0.9397	0.88906	0.99544	0.99509	0.99753	0.99468	0.99947	0.99561	0.99926	0.99632	0.997	0.99724	0.99462	0.99826	0.99986	0.99772	0.99742	0.9963
0.98482	0.95563	0.95774	0.99726	0.99762	0.99009	0.9963	0.95992	0.99766	0.99808	0.99735	0.99741	0.99106	0.99658	0.99788	0.97465	0.99787	0.99474
0.98703	0.95951	0.95528	0.99619	0.9972	0.98764	0.99534	0.95731	0.99706	0.99726	0.9963	0.99639	0.98893	0.99596	0.99783	0.97172	0.99711	0.99331
0.97824	0.95007	0.95805	0.99831	0.99715	0.9915	0.99705	0.96061	0.99754	0.9986	0.9983	0.99833	0.9926	0.99713	0.99905	0.97388	0.99828	0.99511
0.95826	0.91992	0.97493	0.99639	0.99837	0.99074	0.99684	0.97513	0.99798	0.99665	0.99675	0.99687	0.99209	0.99466	0.99934	0.98766	0.99628	0.96477
0.95379	0.91369	0.97703	0.99592	0.99818	0.99032	0.99672	0.97707	0.99769	0.99608	0.99622	0.99635	0.99175	0.9233	0.99934	0.9891	0.9957	0.96355
0.95251	0.91194	0.97609	0.99637	0.99834	0.99068	0.99683	0.97623	0.99795	0.99662	0.99674	0.99686	0.99215	0.95277	0.99937	0.98855	0.9962	0.95899
0.97694	0.94756	0.96338	0.9983	0.99796	0.99217	0.99768	0.96576	0.99816	0.99857	0.99842	0.99847	0.99353	0.99757	0.99931	0.97883	0.99843	0.99535
0.96103	0.9245	0.97805	0.99679	0.9991	0.99234	0.99807	0.97886	0.9988	0.99724	0.99744	0.99759	0.9942	0.99688	0.99969	0.99035	0.99718	0.96355
0.95884	0.91634	0.98768	0.99551	0.99884	0.9932	0.99893	0.98811	0.99926	0.99648	0.99691	0.99713	0.99504	0.99777	0.99986	0.99716	0.99629	0.99497
0.95904	0.92797	0.99667	0.9902	0.993	0.98929	0.99876	0.99662	0.99751	0.99181	0.99193	0.99229	0.99096	0.99598	0.99966	0.99863	0.99128	0.99118
0.96799	0.93272	0.97628	0.99585	0.99853	0.99045	0.99695	0.97656	0.99804	0.99603	0.99621	0.99634	0.99162	0.99519	0.99919	0.98913	0.99591	0.99201
0.96328	0.92496	0.98265	0.99317	0.99729	0.98826	0.99647	0.98251	0.99744	0.99351	0.99392	0.99417	0.98988	0.99403	0.99917	0.99353	0.99343	0.98974
0.96459	0.92824	0.97268	0.99579	0.99797	0.98962	0.99617	0.97287	0.99744	0.99606	0.99606	0.99619	0.99066	0.99387	0.99884	0.98597	0.99567	0.99134
0.96887	0.9339	0.97183	0.9953	0.99776	0.98862	0.99578	0.97194	0.99719	0.99553	0.9955	0.99565	0.98976	0.99365	0.99872	0.98516	0.99518	0.99058
0.96045	0.92235	0.97923	0.99397	0.99751	0.98816	0.996	0.97905	0.99724	0.99436	0.99452	0.99475	0.98979	0.99323	0.99909	0.99097	0.99403	0.98987
0.96657	0.92889	0.98051	0.99237	0.99676	0.98665	0.99575	0.9803	0.99695	0.99285	0.99313	0.99341	0.9882	0.99303	0.99891	0.99203	0.99277	0.98859
0.97617	0.93925	0.97396	0.99242	0.99667	0.98524	0.9949	0.97405	0.9966	0.99361	0.99306	0.99328	0.98681	0.99306	0.99799	0.98797	0.99355	0.98885
0.96487	0.92104	0.98576	0.99042	0.99577	0.98613	0.99662	0.9858	0.99732	0.99173	0.99219	0.9926	0.98857	0.99413	0.9993	0.99588	0.99144	0.98899
0.96944	0.93432	0.97223	0.99465	0.99774	0.98741	0.99576	0.97241	0.9972	0.99533	0.9952	0.99539	0.98935	0.99372	0.99899	0.98535	0.99491	0.99041
0.9603	0.92187	0.98227	0.99331	0.99754	0.98802	0.99663	0.98219	0.9977	0.99407	0.99442	0.99468	0.9903	0.99405	0.99943	0.99335	0.99375	0.99035
0.97914	0.95335	0.94992	0.99861	0.99542	0.9922	0.99692	0.95411	0.99645	0.99876	0.99859	0.99859	0.99294	0.97448	0.99821	0.96758	0.99829	0.98262
0.96055	0.91845	0.98653	0.97876	0.98579	0.97479	0.99284	0.98625	0.99023	0.97835	0.9794	0.98024	0.9768	0.9863	0.99821	0.99182	0.97942	0.97653
0.96231	0.91757	0.98713	0.98708	0.99324	0.9829	0.99573	0.987	0.996	0.98866	0.98933	0.98988	0.98604	0.99258	0.99915	0.99563	0.98828	0.98628
0.95258	0.90499	0.99167	0.99029	0.99519	0.98815	0.99786	0.99179	0.99781	0.99179	0.99303	0.99348	0.99146	0.99569	0.99966	0.99793	0.99114	0.99117
0.96242	0.92455	0.98116	0.99299	0.99725	0.98741	0.99621	0.98096	0.99729	0.99366	0.99394	0.99422	0.98947	0.99345	0.99927	0.99237	0.99334	0.98953
0.96006	0.92213	0.97627	0.99587	0.99844	0.98998	0.99689	0.97647	0.99797	0.99623	0.99636	0.9965	0.99172	0.99466	0.99943	0.98869	0.99585	0.96195
0.94818	0.89864	0.99362	0.9939	0.99722	0.99253	0.99901	0.99361	0.99913	0.99523	0.99591	0.9962	0.99454	0.99712	0.99988	0.99909	0.99461	0.9945
0.95445	0.90641	0.99128	0.98879	0.99362	0.98601	0.99671	0.99102	0.99664	0.98977	0.99031	0.99078	0.98777	0.99296	0.99925	0.99783	0.98959	0.98775
0.94431	0.90305	0.98211	0.99771	0.99956	0.99442	0.99884	0.98301	0.99939	0.99809	0.99843	0.99855	0.99623	0.94394	0.99987	0.99338	0.99808	0.95642
0.96531	0.92789	0.97868	0.99276	0.9967	0.98673	0.99538	0.97847	0.99675	0.9934	0.9934	0.99363	0.98805	0.99233	0.99855	0.99097	0.99317	0.98873
0.96189	0.9252	0.97434	0.99692	0.99865	0.99145	0.99728	0.97475	0.99828	0.99708	0.99716	0.99726	0.99268	0.99533	0.99938	0.98735	0.99676	0.9644
0.9672	0.93314	0.96874	0.99792	0.99836	0.9921	0.9975	0.96985	0.99825	0.99807	0.99804	0.99811	0.99319	0.99622	0.99929	0.98296	0.99773	0.96991
0.9589	0.92084	0.96956	0.99691	0.99766	0.99088	0.99638	0.96979	0.99739	0.99689	0.99687	0.99694	0.99165	0.99388	0.9988	0.98301	0.9963	0.97019
0.96684	0.928	0.98192	0.99154	0.99657	0.98596	0.99612	0.98188	0.99719	0.99272	0.99291	0.99325	0.98836	0.9935	0.99917	0.99335	0.9924	0.98891
0.96472	0.92687	0.98173	0.99258	0.99731	0.98708	0.99653	0.98168	0.9976	0.9936	0.99395	0.99427	0.98971	0.99417	0.99942	0.99294	0.99327	0.98993
0.95181	0.90643	0.9912	0.99234	0.99668	0.99039	0.9984	0.99143	0.99848	0.99367	0.99462	0.995	0.99307	0.99659	0.9998	0.99815	0.99317	0.99274
0.94333	0.8948	0.99433	0.99188	0.99583	0.99108	0.99867	0.99441	0.99837	0.99352	0.99459	0.99498	0.99098	0.997	0.99976	0.99781	0.99273	0.99343
0.93701	0.88613	0.99615	0.99305	0.99607	0.99284	0.99913	0.99623	0.99869	0.99463	0.99557	0.9959	0.99276	0.99771	0.99979	0.99811	0.99375	0.99486
0.93943	0.88893	0.99553	0.99276	0.99599	0.99237	0.99901	0.99566	0.99864	0.99433	0.99536	0.99571	0.99228	0.99751	0.99977	0.99808	0.99339	0.99451
0.9358	0.88457	0.99651	0.99316	0.99591	0.99285	0.99918	0.99656	0.99874	0.99474	0.99568	0.99602	0.99277	0.99775	0.99978	0.99811	0.9937	0.99503
0.96678	0.93108	0.97678	0.99569	0.99854	0.99031	0.99703	0.97709	0.99807	0.996	0.99621	0.99636	0.99168	0.99516	0.99931	0.98946	0.99588	0.99202
0.96121	0.92377	0.97644	0.99576	0.99828	0.99026	0.99668	0.97658	0.99781	0.99607	0.99618	0.99631	0.99143	0.99429	0.99911	0.98918	0.99577	0.96254
0.95935	0.92107	0.98092	0.99535	0.99877	0.99045	0.9976	0.98126	0.99862	0.99622	0.99643	0.99665	0.99264	0.99562	0.99962	0.99284	0.99589	0.99298
0.95578	0.91396	0.98773	0.99508	0.99864	0.99228	0.99871	0.98791	0.99923	0.9963	0.99677	0.997	0.99437	0.99692	0.99977	0.99742	0.99592	0.99459
0.95055	0.90135	0.99315	0.99366	0.99714	0.9921	0.99878	0.99316	0.99898	0.99473	0.99534	0.99559	0.9937	0.9967	0.99982	0.99917	0.99441	0.99355
0.93394	0.88605	0.99781	0.99491	0.99675	0.99482	0.99954	0.99786	0.99903	0.9959	0.99657	0.99679	0.99477	0.99839	0.99982	0.99825	0.99532	0.99616
0.94732	0.89907	0.9934	0.99386	0.99726	0.99238	0.9989	0.99335	0.99906	0.99516	0.99579	0.99608	0.99427	0.99679	0.9999	0.99917	0.99457	0.99414
0.94119	0.89116	0.99627	0.99459	0.99695	0.99403	0.99941	0.99632	0.99925	0.99575	0.99642	0.99668	0.99396	0.99771	0.99992	0.99766	0.99502	0.99554
0.93743	0.88747	0.9971	0.99458	0.9968	0.99431	0.99946	0.99708	0.9992	0.99579	0.99651	0.99677	0.99424	0.99791	0.99991	0.99867	0.99508	0.99583
0.94291	0.89289	0.99579	0.9934	0.99622	0.99278	0.99922	0.99585	0.99896	0.99486	0.9957	0.99602	0.99493	0.9975	0.99991	0.99861	0.99394	0.99478
0.9765	0.94159	0.96975	0.97605	0.98594	0.96375	0.98723	0.96886	0.98745	0.97813	0.97678	0.97754	0.96812	0.9836	0.99662	0.98092	0.97957	0.97207
0.98274	0.94927	0.96617	0.98562	0.99273	0.97427	0.99061	0.9656	0.99259	0.98789	0.98652	0.98696	0.97732	0.98926	0.99704	0.97962	0.98833	0.98186
0.94933	0.90365	0.99115	0.99619	0.99884	0.99478	0.99942	0.99146	0.99961	0.99731	0.99781	0.99801	0.99651	0.99809	0.99987	0.99853	0.99687	0.99657
0.94568	0.90355	0.99122	0.99247	0.99684	0.98996	0.99808	0.99115	0.99831	0.99382	0.99458	0.99494	0.99271	0.99571	0.99983	0.99821	0.99501	0.94856
0.97695	0.93873	0.97631	0.98913	0.99537	0.98141	0.99466	0.97619	0.99598	0.99126	0.99074	0.9912	0.9847	0.99271	0.99873	0.98894	0.99102	0.9867
0.93346	0.88953	0.96971	0.9994	0.99727	0.99761	0.99915	0.97256	0.9973	0.9994	0.9994	0.9994	0.99809	0.96202	0.9995	0.98355	0.98986	0.97859
0.95159	0.90341	0.99228	0.99272	0.99656	0.99067	0.99837	0.99217	0.9986	0.99396	0.99454	0.99487	0.99248	0.99577	0.99975	0.99905	0.99346	0.99243
0.93967	0.89576	0.99356	0.9941	0.99752	0.99285	0.99901	0.99358	0.99907	0.99554	0.99624	0.99652	0.99522	0.99732	0.99993	0.99875	0.99496	0.94506
0.9317	0.8886	0.98607	0.9982	0.99975	0.99627	0.99938	0.98692	0.99952	0.99853	0.99886	0.99895	0.99763	0.89858	0.99989	0.99603	0.99873	0.96263
0.95618	0.91727	0.99294	0.98317	0.98799	0.98157	0.9967	0.99282	0.99402	0.98454	0.98567	0.98638	0.98451	0.99181	0.99941	0.99553	0.98376	0.98434
0.93522	0.88408	0.99671	0.99475	0.99696	0.99458	0.99945	0.99671	0.99902	0.99606	0.99673	0.99699	0.99452	0.99842	0.99978	0.99797	0.99529	0.99626
0.97697	0.94292	0.97148	0.99371	0.99707	0.98678	0.99479	0.97134	0.99647	0.99377	0.99377	0.99394	0.98729	0.99288	0.99799	0.98479	0.9938	0.98871
0.934	0.89265	0.96091	0.99931	0.99497	0.99841	0.99939	0.96478	0.99542	0.9993	0.9993	0.9993	0.99856	0.90498	0.99952	0.97683	0.98611	0.94885
0.95661	0.90893	0.99136	0.99257	0.99671	0.99105	0.99876	0.99157	0.99866	0.99413	0.99514	0.99551	0.99381	0.99735	0.99975	0.998	0.99339	0.99367
0.95986	0.92484	0.95578	0.99809	0.99554	0.99303	0.99651	0.95722	0.99614	0.99799	0.99802	0.99802	0.99303	0.96793	0.99773	0.97106	0.9973	0.97963
0.88409	0.82524	0.985	0.99914	0.99917	0.99702	0.9989	0.98584	0.99871	0.99914	0.99924	0.99927	0.99769	0.8411	0.99964	0.99472	0.93657	0.97361
0.96463	0.92852	0.97493	0.99689	0.99895	0.99167	0.99771	0.97546	0.99865	0.99757	0.99752	0.99763	0.99322	0.99576	0.99917	0.98841	0.99722	0.99406
0.95857	0.91743	0.98615	0.99544	0.99881	0.99235	0.99854	0.98632	0.99918	0.99661	0.99688	0.9971	0.99402	0.99649	0.99961	0.99674	0.99622	0.99435
0.94937	0.9087	0.98654	0.99486	0.99843	0.99128	0.99802	0.98668	0.99874	0.99579	0.99618	0.99641	0.99339	0.99575	0.99977	0.99659	0.9955	0.95248
0.9428	0.8932	0.99481	0.99305	0.99647	0.99198	0.99894	0.99478	0.99888	0.99446	0.99519	0.99552	0.99189	0.99684	0.99993	0.99889	0.9938	0.99383
0.98679	0.96217	0.94522	0.99426	0.99439	0.9844	0.99218	0.94644	0.9943	0.99497	0.99408	0.99414	0.98488	0.99305	0.9957	0.96118	0.99468	0.99043
0.92405	0.87885	0.97661	0.99971	0.9986	0.99831	0.99954	0.97849	0.99828	0.9997	0.9997	0.9997	0.99876	0.89128	0.99988	0.98947	0.98889	0.97289
0.96721	0.93082	0.9759	0.99714	0.9989	0.99259	0.99759	0.97635	0.99864	0.99754	0.99744	0.99754	0.99326	0.99563	0.9987	0.98958	0.99729	0.99406
0.96444	0.92731	0.97635	0.99338	0.99711	0.98668	0.99544	0.97609	0.9967	0.99389	0.99398	0.99422	0.98856	0.99246	0.99899	0.98835	0.99349	0.9889
0.9511	0.91159	0.96843	0.99896	0.99801	0.99418	0.99808	0.96973	0.99802	0.99908	0.99901	0.99904	0.99506	0.96086	0.99949	0.98256	0.9986	0.97493
0.93553	0.89198	0.97866	0.99901	0.99919	0.99605	0.99903	0.97988	0.99892	0.99911	0.99922	0.99926	0.99715	0.90327	0.99986	0.99097	0.99772	0.96764
0.93462	0.89026	0.99466	0.99386	0.99721	0.99302	0.99908	0.99475	0.99893	0.99539	0.99614	0.99644	0.9954	0.99754	0.99986	0.99849	0.99479	0.94094
0.9418	0.89878	0.9854	0.99522	0.99843	0.99108	0.99768	0.9854	0.99844	0.99583	0.99622	0.99643	0.99311	0.90831	0.99972	0.99559	0.99556	0.95091
0.94041	0.89146	0.995	0.99375	0.99685	0.99264	0.99909	0.99497	0.99907	0.99512	0.9958	0.9961	0.99256	0.99689	0.99994	0.99912	0.99436	0.99447
0.94328	0.89755	0.9937	0.99247	0.99634	0.99082	0.99849	0.99359	0.99855	0.99389	0.99464	0.995	0.99314	0.99596	0.99989	0.99886	0.99321	0.99288
0.93518	0.88666	0.9957	0.99472	0.9974	0.99435	0.9994	0.99582	0.99914	0.99613	0.99677	0.99703	0.99429	0.99817	0.99987	0.99764	0.99549	0.99609
0.94606	0.90363	0.99125	0.99392	0.99778	0.99184	0.99863	0.99128	0.99895	0.99529	0.99593	0.99622	0.99417	0.9966	0.99991	0.99866	0.99484	0.994
0.97373	0.94037	0.97031	0.99564	0.99821	0.98864	0.99638	0.97085	0.99773	0.99628	0.99615	0.9963	0.99035	0.99498	0.99903	0.98405	0.99598	0.9918
0.96827	0.93391	0.96825	0.99707	0.99811	0.99042	0.99683	0.96892	0.99794	0.99737	0.99727	0.99737	0.99182	0.99532	0.99919	0.98213	0.99696	0.96978
0.96729	0.92914	0.98121	0.9933	0.99768	0.988	0.99686	0.98138	0.99797	0.99429	0.99458	0.99487	0.99023	0.99481	0.99936	0.99299	0.99408	0.99081
0.94807	0.90699	0.98915	0.99507	0.99853	0.99265	0.9987	0.98936	0.99908	0.99607	0.99663	0.99686	0.99479	0.99707	0.99989	0.99773	0.99587	0.95185
0.95183	0.91149	0.98742	0.99422	0.99821	0.99092	0.9982	0.98756	0.99876	0.99537	0.99596	0.99624	0.99351	0.99623	0.99986	0.99688	0.99505	0.95416
0.93545	0.89188	0.9862	0.99698	0.99941	0.99403	0.99878	0.98663	0.9993	0.99755	0.99791	0.99807	0.99582	0.90182	0.9999	0.99624	0.99749	0.96045
0.94077	0.89825	0.98656	0.99603	0.99891	0.99273	0.99832	0.98674	0.99893	0.99671	0.997	0.99718	0.99452	0.90744	0.99978	0.99657	0.99653	0.94698
0.92478	0.87797	0.98002	0.99905	0.99913	0.9963	0.99892	0.98102	0.99877	0.99909	0.99919	0.99922	0.99722	0.89056	0.99981	0.99194	0.99141	0.96984
0.92294	0.87508	0.98087	0.99889	0.9992	0.99581	0.99874	0.98159	0.99888	0.99897	0.99906	0.9991	0.99679	0.88782	0.99983	0.99254	0.99087	0.96888
0.94508	0.90211	0.99215	0.99197	0.99629	0.98975	0.99808	0.992	0.99814	0.99331	0.99407	0.99446	0.99226	0.99551	0.99981	0.99837	0.99271	0.99196
0.94963	0.90867	0.98711	0.99287	0.99719	0.98891	0.99721	0.98692	0.99787	0.99386	0.99435	0.99467	0.9913	0.99426	0.99965	0.99627	0.9934	0.95119
0.95008	0.9059	0.99173	0.99202	0.99643	0.98999	0.99814	0.99171	0.9982	0.9933	0.99419	0.99456	0.99267	0.99619	0.99976	0.99803	0.99287	0.99225
0.9857	0.95904	0.95387	0.99041	0.99374	0.97905	0.99024	0.95313	0.99244	0.99095	0.99007	0.99028	0.97988	0.98959	0.99644	0.96708	0.99104	0.98468
0.98476	0.96201	0.93774	0.99525	0.9928	0.98717	0.9927	0.93965	0.99384	0.99553	0.99506	0.99508	0.98713	0.99358	0.99445	0.9544	0.99493	0.99232
0.98369	0.96073	0.93823	0.99577	0.99292	0.98816	0.99334	0.94048	0.99412	0.99602	0.99562	0.99564	0.98814	0.99407	0.9948	0.95504	0.99539	0.99301
0.9431	0.90352	0.96526	0.9998	0.99688	0.99737	0.9991	0.9681	0.99707	0.9998	0.9998	0.9998	0.99774	0.96505	0.99965	0.98045	0.99609	0.98007
0.94185	0.90178	0.96622	0.99981	0.99703	0.99748	0.99914	0.96892	0.99717	0.99981	0.99981	0.99981	0.99785	0.96127	0.99967	0.98119	0.9957	0.97968
0.94466	0.9043	0.97967	0.99866	0.99944	0.99579	0.99915	0.98105	0.9992	0.99887	0.99905	0.99912	0.9971	0.9474	0.99989	0.99175	0.99896	0.96102
0.96266	0.92299	0.98433	0.99381	0.99792	0.98958	0.99746	0.98437	0.99833	0.99477	0.9951	0.99536	0.9915	0.99517	0.99951	0.9953	0.99454	0.99172
0.92814	0.87984	0.99827	0.99345	0.9951	0.99361	0.99937	0.99825	0.99853	0.99492	0.99579	0.99613	0.99354	0.99794	0.99968	0.998	0.99358	0.99548
0.93211	0.88592	0.99777	0.99162	0.99386	0.99161	0.99904	0.9977	0.99798	0.99306	0.99412	0.99451	0.99152	0.99687	0.99973	0.99815	0.99186	0.99365
0.93031	0.88514	0.99804	0.99201	0.9939	0.99208	0.99916	0.99802	0.99804	0.9934	0.99448	0.99486	0.992	0.99703	0.99972	0.99815	0.99214	0.99407
0.92484	0.8783	0.99863	0.99382	0.99509	0.99391	0.99944	0.9986	0.99862	0.99507	0.99591	0.99623	0.99385	0.99762	0.99976	0.99844	0.99379	0.99559
0.93097	0.8824	0.99811	0.99288	0.99481	0.99291	0.9993	0.99803	0.99853	0.99435	0.99533	0.99569	0.99283	0.99747	0.9998	0.99829	0.99303	0.99485
0.97236	0.93337	0.97987	0.99131	0.9966	0.98515	0.99597	0.9798	0.99712	0.99267	0.99271	0.99307	0.98767	0.99378	0.99906	0.99184	0.99244	0.98872
0.97488	0.94026	0.97182	0.9954	0.99795	0.98901	0.99596	0.97204	0.99746	0.99573	0.99551	0.99566	0.98981	0.99416	0.99822	0.98578	0.99553	0.99118
0.94102	0.90155	0.96146	0.99957	0.99588	0.99765	0.99915	0.96484	0.99636	0.99956	0.99956	0.99956	0.99791	0.96301	0.99933	0.97718	0.99377	0.98196
0.91667	0.86917	0.98676	0.99822	0.99931	0.99715	0.99934	0.98783	0.99907	0.99843	0.99866	0.99873	0.9983	0.88118	0.99961	0.99537	0.9905	0.95812
0.9489	0.90955	0.97868	0.9987	0.99951	0.99543	0.99904	0.97991	0.99934	0.99901	0.99914	0.99921	0.99661	0.99764	0.99976	0.99134	0.99895	0.95642
0.96688	0.92772	0.98106	0.99264	0.99708	0.98722	0.99634	0.981	0.99746	0.99401	0.99385	0.99412	0.98923	0.99354	0.99878	0.99326	0.99364	0.99001
0.94446	0.89582	0.99414	0.99367	0.99706	0.99267	0.99905	0.9942	0.99897	0.99503	0.99583	0.99614	0.99487	0.99744	0.99991	0.99851	0.99441	0.99459
0.9491	0.90353	0.99204	0.99298	0.99709	0.99134	0.99868	0.99214	0.99881	0.99451	0.99546	0.9958	0.9941	0.997	0.99988	0.99849	0.99392	0.99388
0.93826	0.89412	0.99753	0.99407	0.99589	0.99413	0.99935	0.99757	0.99867	0.99533	0.99616	0.99644	0.99406	0.99828	0.9996	0.99772	0.9943	0.99582
0.93543	0.88899	0.99755	0.9927	0.99482	0.99285	0.99917	0.99759	0.9983	0.99421	0.99526	0.9956	0.99277	0.99778	0.99961	0.99301	0.99292	0.99485
0.96596	0.92888	0.97949	0.99331	0.99725	0.98768	0.99588	0.97931	0.99716	0.99366	0.99394	0.99416	0.98901	0.99331	0.99891	0.99129	0.99357	0.9893
0.95577	0.91478	0.98743	0.99488	0.9984	0.99175	0.99825	0.98762	0.99889	0.99562	0.99602	0.99626	0.99342	0.99628	0.99971	0.99726	0.99542	0.99327
0.94188	0.90133	0.98179	0.99853	0.99952	0.99609	0.9994	0.98288	0.99947	0.99898	0.99917	0.99925	0.99763	0.99791	0.9996	0.99332	0.99894	0.95281
0.95287	0.91388	0.97954	0.99778	0.99901	0.9942	0.9979	0.97995	0.99882	0.99798	0.99795	0.99802	0.99457	0.99543	0.99875	0.9924	0.99757	0.95787
0.94993	0.90954	0.98333	0.99637	0.99917	0.99243	0.99826	0.98379	0.99908	0.99713	0.99736	0.99754	0.99431	0.99622	0.99975	0.99473	0.99685	0.95427
0.95247	0.91203	0.9864	0.9958	0.99882	0.99256	0.99827	0.98662	0.99906	0.99656	0.99681	0.99699	0.99398	0.99608	0.99964	0.99691	0.99635	0.99406
0.95543	0.91583	0.98577	0.9936	0.99788	0.98958	0.9976	0.98582	0.99834	0.99466	0.9952	0.99548	0.9922	0.99538	0.99976	0.99575	0.99431	0.99204
0.94656	0.90113	0.99268	0.99199	0.99613	0.99001	0.99792	0.99252	0.99809	0.99283	0.99358	0.99391	0.99188	0.99538	0.99963	0.99854	0.99271	0.99137
0.93221	0.88092	0.9973	0.99461	0.99674	0.99461	0.99947	0.99737	0.99901	0.99594	0.99665	0.9969	0.99455	0.99832	0.9998	0.99522	0.99515	0.99623
0.92726	0.87605	0.99826	0.99517	0.99674	0.99525	0.9996	0.99828	0.99916	0.99647	0.99712	0.99736	0.9952	0.99837	0.99983	0.99833	0.99744	0.99676
0.95921	0.92299	0.96867	0.99829	0.9982	0.99381	0.99742	0.9697	0.99817	0.99832	0.99824	0.99827	0.99412	0.99538	0.99828	0.98335	0.99779	0.96516
0.9681	0.93255	0.97238	0.99438	0.99706	0.98779	0.99505	0.97216	0.99646	0.99445	0.99445	0.9946	0.98854	0.99229	0.9982	0.98539	0.99415	0.98925
0.95005	0.91018	0.98029	0.99772	0.99936	0.99392	0.9983	0.98084	0.99914	0.99808	0.99813	0.99823	0.99492	0.99626	0.99957	0.99269	0.99784	0.95588
0.94695	0.90045	0.99251	0.99496	0.99812	0.99384	0.99925	0.99268	0.99928	0.9962	0.9969	0.99715	0.99585	0.99794	0.99988	0.99852	0.99575	0.99569
0.94152	0.89052	0.9956	0.9936	0.99658	0.99261	0.99913	0.99558	0.99907	0.99493	0.99557	0.99588	0.99253	0.997	0.99993	0.99912	0.99426	0.99437
0.94919	0.906	0.99089	0.99385	0.99764	0.9915	0.99851	0.99084	0.99891	0.9952	0.99574	0.99602	0.99358	0.99605	0.99981	0.9988	0.99465	0.99352
0.94812	0.9045	0.99077	0.99572	0.99871	0.99399	0.99925	0.99099	0.99953	0.99697	0.9975	0.99771	0.99588	0.99762	0.99987	0.99861	0.99648	0.99598
0.95863	0.9134	0.98837	0.99338	0.9973	0.99011	0.99779	0.98836	0.99854	0.99466	0.99486	0.99514	0.99177	0.99518	0.99936	0.99808	0.99421	0.99214
0.96018	0.92157	0.98214	0.99509	0.99869	0.99056	0.99784	0.9825	0.99879	0.99631	0.99649	0.99671	0.99291	0.99585	0.99957	0.99391	0.9959	0.99346
0.94575	0.90341	0.96619	0.99879	0.99728	0.99356	0.99754	0.96735	0.99739	0.9989	0.99879	0.99881	0.99443	0.96232	0.99934	0.98012	0.99633	0.9785
0.99107	0.96907	0.93987	0.99019	0.99247	0.97659	0.98887	0.9395	0.99138	0.99144	0.98995	0.9901	0.97809	0.99051	0.99481	0.954	0.99174	0.98508
0.97434	0.95023	0.93556	0.99733	0.99027	0.9927	0.99598	0.94241	0.99296	0.99725	0.9973	0.9973	0.99307	0.97822	0.99623	0.9549	0.99502	0.98309
0.91404	0.86408	0.98	0.9994	0.99896	0.99696	0.99903	0.98108	0.99855	0.99941	0.99945	0.99947	0.99762	0.87784	0.99981	0.99077	0.97863	0.99762
0.91179	0.86108	0.98029	0.99935	0.99896	0.9968	0.99895	0.98124	0.99855	0.99936	0.99941	0.99943	0.99748	0.87507	0.9998	0.99206	0.97569	0.97368
0.94817	0.90761	0.97738	0.99816	0.99914	0.99401	0.99849	0.97829	0.99893	0.99837	0.99853	0.99861	0.99557	0.9523	0.99981	0.98981	0.99826	0.99568
0.94514	0.9035	0.977	0.99828	0.99902	0.99413	0.9984	0.97785	0.9988	0.99848	0.99859	0.99866	0.9956	0.91405	0.99981	0.98943	0.99842	0.96779
0.97205	0.93589	0.97451	0.99451	0.99774	0.98825	0.99611	0.97465	0.99743	0.99542	0.9951	0.99529	0.98971	0.99383	0.99826	0.98822	0.99514	0.99102
0.92351	0.87336	0.99867	0.99463	0.99598	0.99477	0.99953	0.99866	0.99892	0.99598	0.9967	0.99697	0.99472	0.99814	0.99977	0.99833	0.99479	0.99641
0.94311	0.89301	0.99509	0.99248	0.99601	0.99164	0.99887	0.99505	0.99866	0.99392	0.99486	0.9952	0.99155	0.99692	0.99992	0.99857	0.99319	0.99361
0.9374	0.88683	0.99671	0.99427	0.99666	0.994	0.9994	0.99672	0.99901	0.99557	0.99633	0.99661	0.99394	0.99814	0.99983	0.99821	0.9948	0.99573
0.92929	0.87891	0.99813	0.9943	0.99599	0.99438	0.99948	0.99813	0.99889	0.99573	0.99648	0.99678	0.99432	0.99819	0.99977	0.99814	0.99455	0.99613
0.94507	0.90032	0.99215	0.99484	0.99811	0.99337	0.99911	0.9922	0.99937	0.99633	0.99705	0.9973	0.99565	0.99743	0.99982	0.99881	0.99571	0.99573
0.94994	0.90974	0.99604	0.9883	0.99142	0.98773	0.99841	0.99594	0.99714	0.99097	0.99183	0.99238	0.99096	0.99539	0.99969	0.99778	0.9888	0.99105
0.94862	0.90888	0.99656	0.98962	0.99224	0.9891	0.99867	0.9965	0.9976	0.99207	0.99288	0.99336	0.99209	0.99599	0.99969	0.99807	0.99	0.99217
0.94202	0.9026	0.99774	0.99148	0.99329	0.99132	0.99906	0.9977	0.99809	0.99372	0.99445	0.99486	0.99383	0.9966	0.9996	0.99827	0.99174	0.99393
0.94108	0.90441	0.99848	0.9945	0.99561	0.9942	0.99936	0.99846	0.99889	0.99594	0.99619	0.99644	0.99551	0.99738	0.99958	0.99879	0.99476	0.9957
0.94899	0.91033	0.97448	0.99893	0.99863	0.99577	0.99883	0.97584	0.99844	0.99902	0.99903	0.99906	0.99676	0.9204	0.99971	0.98772	0.99904	0.97123
0.95353	0.91298	0.98831	0.99052	0.99556	0.98679	0.99659	0.98797	0.99691	0.99138	0.99217	0.99259	0.98933	0.99359	0.99948	0.99615	0.99105	0.98883
0.93849	0.88958	0.99541	0.99403	0.99689	0.99291	0.99911	0.99532	0.99912	0.99532	0.99586	0.99615	0.99283	0.9967	0.9999	0.99927	0.99462	0.99448
0.9554	0.9156	0.98391	0.99362	0.99777	0.98896	0.9972	0.98387	0.9981	0.99489	0.99512	0.99541	0.99137	0.99431	0.99948	0.99487	0.99435	0.9916
0.95515	0.91531	0.98262	0.99388	0.99789	0.98881	0.99706	0.98265	0.99807	0.99507	0.99529	0.99555	0.99133	0.99421	0.99946	0.99393	0.99456	0.95616
0.97725	0.9451	0.9672	0.99155	0.99554	0.98273	0.99294	0.96663	0.99468	0.99193	0.99169	0.9919	0.98394	0.99059	0.99787	0.97996	0.99175	0.98587
0.96184	0.92999	0.94309	0.99791	0.99243	0.99309	0.99616	0.94617	0.99402	0.99784	0.99788	0.99788	0.99299	0.97536	0.99712	0.95951	0.99668	0.98636
0.90948	0.85883	0.97664	0.9983	0.99659	0.99861	0.99898	0.9791	0.99603	0.99828	0.99828	0.99828	0.99875	0.87398	0.99901	0.98852	0.95378	0.983
0.91776	0.87039	0.97122	0.99785	0.99515	0.99883	0.99888	0.97473	0.9949	0.99782	0.99782	0.99782	0.99888	0.8849	0.99881	0.98455	0.96172	0.98515
0.9528	0.91262	0.98674	0.99295	0.99725	0.98895	0.99718	0.98663	0.99791	0.99378	0.99437	0.99466	0.98883	0.99456	0.99963	0.99606	0.99354	0.95399
0.94032	0.89664	0.99353	0.99251	0.99649	0.99107	0.99863	0.99356	0.99855	0.99419	0.99503	0.99541	0.99396	0.99675	0.99986	0.99834	0.99342	0.94484
0.93955	0.89249	0.99471	0.99365	0.99694	0.99264	0.99909	0.99472	0.99907	0.99524	0.996	0.99631	0.99492	0.99705	0.99995	0.99882	0.99439	0.99476
0.95174	0.91057	0.98883	0.99168	0.99653	0.98825	0.99743	0.98868	0.99797	0.99314	0.99384	0.9942	0.99116	0.99458	0.99975	0.99725	0.9926	0.99091
0.95443	0.91435	0.98618	0.99209	0.99686	0.98772	0.99696	0.98603	0.99772	0.99335	0.99384	0.9942	0.99052	0.99403	0.99964	0.99579	0.99282	0.99033
0.94419	0.90213	0.98104	0.99732	0.99921	0.99325	0.99814	0.98141	0.99895	0.99765	0.9978	0.99791	0.99461	0.9121	0.99972	0.99276	0.99741	0.99459
0.95458	0.90798	0.99072	0.99058	0.99532	0.98792	0.99755	0.99051	0.99779	0.99226	0.99283	0.99326	0.99023	0.99437	0.99959	0.99825	0.99158	0.99032
0.97504	0.94031	0.97408	0.99197	0.99666	0.98439	0.9949	0.97393	0.99643	0.99298	0.99284	0.99314	0.98652	0.99276	0.99873	0.98671	0.99281	0.98802
0.97219	0.94047	0.9597	0.99667	0.99655	0.99109	0.99528	0.96057	0.99661	0.9967	0.99653	0.99659	0.99097	0.99374	0.99637	0.97488	0.99607	0.99289
0.92019	0.87241	0.96833	0.99969	0.99665	0.99817	0.99921	0.9708	0.99658	0.99968	0.99968	0.99968	0.9984	0.88635	0.99974	0.98254	0.97461	0.98374
0.8882	0.82973	0.97339	0.99936	0.99648	0.99868	0.99917	0.97555	0.99586	0.99936	0.99936	0.99936	0.9987	0.84685	0.9996	0.98611	0.92497	0.98898
0.95644	0.91955	0.963	0.9991	0.99732	0.99424	0.99792	0.96489	0.99758	0.99919	0.99908	0.99909	0.99495	0.96431	0.99903	0.97799	0.9986	0.97711
0.96332	0.92555	0.98095	0.99297	0.99728	0.98737	0.99629	0.98078	0.99733	0.99378	0.99402	0.99431	0.98949	0.99346	0.99927	0.99233	0.99345	0.98968
0.95083	0.90716	0.99092	0.99173	0.99609	0.98894	0.99749	0.9907	0.99781	0.99255	0.99326	0.99361	0.99093	0.99456	0.99959	0.99819	0.99232	0.99054
0.93431	0.88754	0.99565	0.99333	0.99641	0.99269	0.9991	0.99569	0.99875	0.995	0.99577	0.99612	0.99524	0.99765	0.9998	0.9975	0.99412	0.99502
0.93972	0.89381	0.99434	0.99277	0.99643	0.99172	0.99891	0.99442	0.99879	0.99456	0.99553	0.99591	0.99463	0.9972	0.99988	0.99842	0.99357	0.99438
0.9344	0.88523	0.99595	0.99445	0.99709	0.9941	0.99937	0.99594	0.99912	0.99597	0.99677	0.99705	0.99403	0.99809	0.99986	0.99753	0.99511	0.99612
0.95088	0.90987	0.97651	0.99694	0.9988	0.99152	0.9975	0.97699	0.99854	0.99732	0.99745	0.99759	0.99339	0.95297	0.99968	0.98889	0.99696	0.99361
0.97791	0.94857	0.94769	0.99367	0.99343	0.98364	0.99196	0.94785	0.99336	0.99395	0.99341	0.99348	0.98453	0.99097	0.99635	0.96153	0.9933	0.98856
0.97393	0.94084	0.96594	0.99419	0.99665	0.98594	0.99449	0.96569	0.99594	0.99446	0.9943	0.99447	0.98725	0.99233	0.99851	0.97885	0.99403	0.98879
0.90768	0.85528	0.97552	0.99884	0.99711	0.99856	0.99914	0.97797	0.9967	0.99882	0.99882	0.99882	0.99879	0.87051	0.99926	0.98753	0.956	0.98229
0.93263	0.88835	0.97621	0.99839	0.99811	0.99722	0.99886	0.9788	0.99806	0.9985	0.99847	0.9985	0.99807	0.94879	0.99901	0.98802	0.99391	0.96917
0.9607	0.92262	0.97923	0.99447	0.99801	0.98875	0.99659	0.97923	0.99773	0.99504	0.99526	0.99546	0.99068	0.99405	0.99937	0.99101	0.9947	0.9909
0.94704	0.90346	0.99204	0.99253	0.99685	0.99069	0.99847	0.99203	0.99864	0.99416	0.99506	0.99543	0.99355	0.99645	0.99991	0.99848	0.9935	0.99325
0.95033	0.90945	0.98852	0.99318	0.99755	0.98997	0.99796	0.9885	0.99851	0.99455	0.99518	0.99549	0.99278	0.99566	0.99986	0.9973	0.99551	0.95226
0.9407	0.89622	0.99357	0.99389	0.99737	0.99277	0.99906	0.99372	0.999	0.99543	0.9962	0.9965	0.99526	0.99759	0.99988	0.99847	0.99474	0.99503
0.95034	0.90871	0.97785	0.99556	0.99804	0.9899	0.99654	0.97777	0.99758	0.99586	0.99603	0.99619	0.99147	0.91872	0.99934	0.98977	0.99544	0.95659
0.91704	0.86548	0.97513	0.99853	0.99793	0.99414	0.99746	0.9757	0.99772	0.99856	0.99854	0.99857	0.99487	0.95858	0.99942	0.98779	0.97873	0.97705
0.89835	0.8412	0.97893	0.99829	0.99803	0.99388	0.99715	0.97927	0.99777	0.99833	0.99831	0.99835	0.99456	0.95434	0.9993	0.99076	0.95749	0.97652
0.97464	0.9493	0.94112	0.998	0.99298	0.99261	0.99618	0.9448	0.99474	0.998	0.99798	0.99798	0.99267	0.97672	0.99688	0.95837	0.99711	0.99583
0.99167	0.97007	0.94012	0.98947	0.99236	0.9755	0.9884	0.93968	0.99105	0.99101	0.98925	0.98941	0.97698	0.99039	0.99501	0.95407	0.99149	0.98594
0.97762	0.95244	0.93918	0.9968	0.99234	0.98894	0.99437	0.94115	0.99381	0.99678	0.99673	0.99671	0.98911	0.97953	0.99695	0.95473	0.99576	0.99338
0.98166	0.95295	0.95662	0.99466	0.99576	0.98657	0.99326	0.95675	0.99518	0.99461	0.99437	0.99445	0.98652	0.99235	0.99644	0.97113	0.99424	0.98946
0.96646	0.9385	0.94367	0.99874	0.99258	0.99525	0.99774	0.94911	0.99446	0.99872	0.99872	0.99872	0.99544	0.97633	0.99804	0.96188	0.99793	0.98714
0.98966	0.96287	0.95276	0.98914	0.99412	0.97622	0.99034	0.95257	0.99284	0.99131	0.98944	0.9897	0.97863	0.9911	0.9964	0.96723	0.99175	0.98353
0.97361	0.94409	0.94949	0.99715	0.99463	0.98985	0.9952	0.95067	0.99537	0.99709	0.99702	0.99703	0.99017	0.97404	0.99764	0.96444	0.9962	0.99293
0.9681	0.93711	0.94768	0.99785	0.99401	0.99158	0.99593	0.9495	0.99507	0.99778	0.99782	0.99781	0.99177	0.97485	0.99778	0.96313	0.99667	0.98442
0.96851	0.93852	0.94391	0.99752	0.99302	0.99134	0.99549	0.94597	0.99436	0.99743	0.9975	0.9975	0.99136	0.97607	0.99727	0.95962	0.99628	0.9779
0.97228	0.94135	0.94921	0.99626	0.99404	0.98837	0.99436	0.94972	0.99464	0.99614	0.99607	0.9961	0.98879	0.97362	0.99748	0.96331	0.99516	0.9819
0.95657	0.92212	0.94365	0.99831	0.99201	0.99396	0.99706	0.9474	0.99368	0.99829	0.99829	0.99829	0.9942	0.97856	0.99812	0.96021	0.9946	0.96859
0.94045	0.89007	0.99576	0.99265	0.99573	0.99239	0.99905	0.9959	0.99856	0.99427	0.99531	0.99567	0.9923	0.99765	0.99974	0.99791	0.99321	0.99456
0.93621	0.88758	0.99716	0.99452	0.99641	0.99459	0.99937	0.99717	0.99876	0.99587	0.99662	0.99689	0.99453	0.99846	0.99959	0.99751	0.99486	0.99629
0.92604	0.87578	0.99841	0.9945	0.99583	0.99464	0.99949	0.99841	0.99887	0.99597	0.99672	0.997	0.99458	0.99822	0.99971	0.99808	0.99459	0.99644
0.93235	0.88152	0.99738	0.99372	0.99584	0.99374	0.99932	0.9974	0.99872	0.99527	0.99612	0.99643	0.99367	0.99811	0.9997	0.99791	0.9941	0.99572
0.92954	0.87868	0.99786	0.99415	0.99598	0.99435	0.99943	0.9979	0.99879	0.99578	0.9966	0.99689	0.99429	0.99829	0.99969	0.99788	0.99448	0.99629
0.94616	0.89933	0.99567	0.99077	0.99424	0.99033	0.99878	0.99573	0.99812	0.99284	0.99409	0.99454	0.99346	0.99691	0.99971	0.9979	0.99139	0.99327
0.94871	0.90314	0.99551	0.99131	0.99462	0.99071	0.99877	0.99552	0.99828	0.99307	0.99418	0.99457	0.99338	0.99692	0.99974	0.99816	0.99184	0.99325
0.95057	0.906	0.99526	0.99026	0.99394	0.98952	0.99858	0.99527	0.99801	0.99242	0.9935	0.99395	0.99256	0.99644	0.99974	0.99813	0.99102	0.99253
0.95438	0.90866	0.99352	0.98976	0.99421	0.9888	0.9984	0.99364	0.99784	0.99181	0.99315	0.99365	0.99215	0.99655	0.99967	0.99763	0.99057	0.99199
0.95601	0.91146	0.99352	0.9884	0.99298	0.98681	0.99796	0.99341	0.9974	0.99097	0.99169	0.9922	0.99004	0.99506	0.99963	0.99807	0.98958	0.99027
0.97535	0.9447	0.95424	0.99418	0.99432	0.98547	0.99268	0.95383	0.99403	0.99398	0.99391	0.99398	0.98566	0.991	0.9972	0.96758	0.99325	0.98814
0.91986	0.87131	0.9589	0.99854	0.99316	0.99815	0.9989	0.9627	0.99356	0.99853	0.99853	0.99853	0.99817	0.8863	0.99939	0.97432	0.96194	0.99189
0.93059	0.88551	0.95944	0.99915	0.99437	0.99739	0.99864	0.96284	0.99486	0.99914	0.99914	0.99914	0.99756	0.89911	0.99945	0.97482	0.97826	0.98868
0.92593	0.87932	0.9627	0.99929	0.99504	0.99785	0.99894	0.96571	0.99526	0.99928	0.99928	0.99928	0.99799	0.89338	0.99957	0.97764	0.97411	0.93743
0.87294	0.81231	0.9896	0.99843	0.9994	0.99616	0.99872	0.99008	0.99921	0.99852	0.99878	0.99886	0.99716	0.82838	0.99967	0.99782	0.922	0.96792
0.93571	0.89036	0.97511	0.99867	0.99854	0.99432	0.99808	0.97594	0.99833	0.99875	0.99877	0.99881	0.99548	0.90266	0.99972	0.98786	0.99504	0.97339
0.94614	0.90405	0.99109	0.99364	0.99763	0.99172	0.99863	0.99126	0.99875	0.99499	0.99577	0.99607	0.99436	0.99706	0.99982	0.99807	0.99458	0.99405
0.94547	0.90321	0.99138	0.99364	0.9976	0.99183	0.99866	0.99154	0.99876	0.995	0.99579	0.9961	0.99445	0.99712	0.99982	0.99813	0.99459	0.99413
0.93744	0.8871	0.99561	0.99509	0.99757	0.99471	0.99948	0.99573	0.9993	0.99644	0.99712	0.99736	0.99465	0.99822	0.99989	0.99782	0.99573	0.99641
0.94745	0.90536	0.99012	0.99559	0.99879	0.99371	0.99915	0.99038	0.99943	0.99681	0.99735	0.99758	0.99364	0.99763	0.99992	0.99826	0.99642	0.99574
0.95797	0.9188	0.98093	0.99288	0.99705	0.98706	0.99593	0.98069	0.99708	0.99369	0.99388	0.99414	0.9893	0.99274	0.99924	0.9921	0.99322	0.95758
0.93273	0.88205	0.99665	0.99152	0.99475	0.99103	0.99888	0.99652	0.99825	0.99326	0.99429	0.99472	0.99093	0.99676	0.99986	0.99822	0.99212	0.99346
0.96891	0.93401	0.96722	0.99423	0.9964	0.98672	0.99415	0.9669	0.99569	0.99422	0.99419	0.99433	0.98741	0.99153	0.99798	0.98036	0.99374	0.98853
0.95845	0.9153	0.96991	0.99642	0.99854	0.99087	0.99432	0.97048	0.99831	0.99773	0.99751	0.9976	0.99203	0.92572	0.99811	0.98062	0.99686	0.97313
0.96363	0.92997	0.94919	0.99925	0.99458	0.99562	0.99712	0.95356	0.99643	0.9995	0.9995	0.99924	0.99644	0.97644	0.99819	0.96411	0.99732	0.98898
0.8932	0.8296	0.98239	0.99924	0.99955	0.9973	0.99502	0.98323	0.99945	0.99955	0.99958	0.99965	0.9978	0.84702	0.99685	0.99085	0.93011	0.98398
0.92311	0.86718	0.97162	0.99966	0.99859	0.99684	0.9946	0.97347	0.99895	0.99978	0.9998	0.99983	0.99742	0.88253	0.99662	0.98178	0.96788	0.98648
0.97241	0.93731	0.95476	0.99518	0.99557	0.98752	0.99266	0.95502	0.99542	0.99623	0.99606	0.99515	0.98909	0.99162	0.99615	0.9665	0.99427	0.9777
0.96385	0.92465	0.98388	0.99117	0.99729	0.98819	0.99511	0.98392	0.9985	0.99385	0.9937	0.9954	0.98853	0.99432	0.99891	0.99315	0.99503	0.99103
0.94861	0.9027	0.97319	0.99787	0.99937	0.99445	0.99548	0.97424	0.99938	0.99889	0.99876	0.99912	0.99487	0.91405	0.99842	0.98381	0.9981	0.974
0.94023	0.88983	0.97615	0.99741	0.99941	0.99355	0.99424	0.9769	0.99932	0.99859	0.9985	0.99888	0.99449	0.90253	0.99798	0.98581	0.99443	0.97461
0.95181	0.90626	0.9757	0.99662	0.99943	0.9928	0.99467	0.97646	0.99928	0.99813	0.99798	0.99859	0.99349	0.91712	0.99842	0.98576	0.99798	0.97057
0.96141	0.92003	0.96619	0.99778	0.99877	0.99274	0.99448	0.96747	0.99894	0.99878	0.99859	0.99876	0.99359	0.96451	0.99815	0.9773	0.99815	0.97803
0.94702	0.90139	0.99386	0.99131	0.99613	0.9919	0.99798	0.99406	0.99921	0.9935	0.99404	0.99637	0.99094	0.99718	0.99962	0.99877	0.99636	0.99434
0.95932	0.91141	0.99129	0.98678	0.99221	0.98515	0.99622	0.99118	0.99672	0.98912	0.98864	0.99073	0.98536	0.99259	0.99805	0.9983	0.99115	0.98799
0.96662	0.92806	0.97718	0.99379	0.99834	0.98903	0.99461	0.97734	0.99834	0.9957	0.9955	0.99629	0.98969	0.9941	0.99858	0.98748	0.99567	0.99146
0.96329	0.92376	0.98603	0.98964	0.99639	0.98726	0.99509	0.98598	0.99828	0.9925	0.99252	0.99458	0.98755	0.99434	0.99907	0.99448	0.99426	0.9903
0.94352	0.89293	0.99584	0.98938	0.994	0.99067	0.99797	0.99586	0.99869	0.99141	0.99216	0.99507	0.99066	0.99664	0.99965	0.99853	0.99499	0.9932
0.94651	0.89432	0.99565	0.99285	0.99616	0.99359	0.99887	0.99569	0.9995	0.99433	0.99479	0.99698	0.99339	0.99758	0.99971	0.99896	0.99702	0.99548
0.94306	0.89057	0.99627	0.99137	0.99508	0.99241	0.9986	0.99635	0.99916	0.993	0.99359	0.99612	0.99231	0.99719	0.99973	0.9989	0.99611	0.99456
0.95859	0.91786	0.98563	0.99163	0.9976	0.98926	0.99528	0.98566	0.99868	0.99417	0.99432	0.99591	0.98975	0.9949	0.99901	0.99404	0.99546	0.95686
0.95837	0.91769	0.98611	0.99149	0.99749	0.98925	0.99535	0.98613	0.99868	0.99409	0.9942	0.99585	0.98977	0.99498	0.99902	0.99441	0.99542	0.95676
0.94244	0.89865	0.99387	0.99069	0.99604	0.99153	0.99734	0.99401	0.99914	0.99343	0.99395	0.99636	0.99197	0.99686	0.99948	0.99868	0.9963	0.94517
0.93803	0.89222	0.99533	0.99237	0.99634	0.99377	0.99845	0.99562	0.99925	0.99448	0.99506	0.99724	0.99407	0.99809	0.99946	0.9983	0.99733	0.99592
0.949	0.90578	0.99234	0.99078	0.99635	0.991	0.99724	0.9925	0.99918	0.99349	0.99394	0.9962	0.99141	0.99651	0.99949	0.99849	0.99609	0.9936
0.96404	0.92312	0.96482	0.99641	0.9979	0.9905	0.99354	0.96539	0.99769	0.99754	0.9973	0.99719	0.99134	0.9635	0.99743	0.97565	0.99634	0.96715
0.96877	0.93097	0.97689	0.99149	0.99702	0.98598	0.99302	0.97656	0.9971	0.99362	0.99339	0.99426	0.98647	0.99212	0.99824	0.98637	0.99348	0.98847
0.93847	0.88607	0.9969	0.98997	0.99394	0.99159	0.99829	0.99699	0.99873	0.99183	0.99266	0.99548	0.99029	0.99725	0.9996	0.99832	0.99546	0.99405
0.96057	0.92077	0.98459	0.98945	0.99574	0.98581	0.99377	0.98419	0.99717	0.99189	0.99193	0.9932	0.98631	0.99221	0.99866	0.99271	0.99263	0.98797
0.9585	0.94486	0.90183	0.98476	0.96514	0.99405	0.99315	0.9255	0.97509	0.99098	0.99098	0.9846	0.99672	0.98578	0.99339	0.93341	0.97786	0.99536
0.92121	0.86666	0.97038	0.99986	0.99806	0.99787	0.99626	0.97279	0.99842	0.9999	0.9999	0.99989	0.99822	0.8819	0.99756	0.98142	0.96552	0.98729
0.96226	0.94947	0.90927	0.98561	0.96654	0.99389	0.99311	0.93172	0.97627	0.99105	0.99105	0.98545	0.99638	0.95756	0.99305	0.94008	0.9823	0.99425
0.9338	0.88164	0.97429	0.99868	0.99928	0.99501	0.99459	0.97536	0.99943	0.99927	0.99924	0.99943	0.9959	0.89536	0.99751	0.98425	0.9866	0.9799
0.93138	0.8779	0.97658	0.99815	0.99947	0.99452	0.99414	0.97742	0.99951	0.99901	0.99897	0.99924	0.99547	0.89173	0.99741	0.98604	0.98642	0.97774
0.9204	0.86344	0.97161	0.99969	0.99845	0.99692	0.9948	0.97353	0.99881	0.9998	0.99981	0.99982	0.99753	0.87905	0.99672	0.98178	0.96448	0.98674
0.94878	0.90185	0.96499	0.99867	0.99817	0.9939	0.99423	0.96645	0.99868	0.99926	0.99916	0.99909	0.99496	0.91421	0.99786	0.97587	0.9938	0.98241
0.99489	0.96743	0.95395	0.99554	0.99786	0.98524	0.99533	0.95559	0.99734	0.99673	0.99582	0.99593	0.98715	0.99703	0.99815	0.97136	0.99711	0.99314
0.98414	0.95431	0.9594	0.99521	0.99697	0.98678	0.99446	0.96025	0.99637	0.99589	0.99515	0.99526	0.98757	0.99419	0.99726	0.97522	0.99571	0.99111
0.99438	0.97359	0.9381	0.99386	0.99412	0.98182	0.99167	0.93926	0.99406	0.99474	0.99368	0.99376	0.98271	0.9943	0.99572	0.95469	0.9949	0.99108
0.9752	0.95464	0.93615	0.99859	0.99013	0.99546	0.99811	0.94399	0.99298	0.99858	0.99858	0.99858	0.99569	0.96163	0.99866	0.95675	0.99725	0.99887
0.98417	0.97166	0.91888	0.9967	0.98552	0.99148	0.99532	0.92878	0.99006	0.99667	0.99667	0.99667	0.99156	0.98856	0.99605	0.94168	0.99519	0.99321
0.94289	0.90417	0.98979	0.99572	0.99768	0.99598	0.99836	0.99094	0.9975	0.99598	0.99669	0.99683	0.99742	0.99944	0.99843	0.99576	0.99701	0.95031
0.9826	0.94455	0.97636	0.99127	0.99719	0.98426	0.99632	0.97657	0.99738	0.99318	0.99288	0.99319	0.98759	0.99553	0.99918	0.99006	0.99335	0.98957
0.97829	0.95028	0.96604	0.99837	0.99792	0.99397	0.99848	0.96884	0.99818	0.99848	0.99846	0.9985	0.99526	0.99856	0.99943	0.98165	0.99867	0.99616
0.98631	0.96342	0.95158	0.99898	0.99628	0.99275	0.99764	0.95601	0.99727	0.9992	0.99892	0.99893	0.9936	0.99863	0.99897	0.96976	0.99901	0.99703
0.98576	0.9504	0.97416	0.99457	0.99881	0.99183	0.99754	0.97739	0.99871	0.99653	0.99703	0.99726	0.99436	0.99906	0.999	0.98776	0.99776	0.99532
0.97471	0.93458	0.98204	0.99469	0.99857	0.99423	0.99818	0.98448	0.9987	0.99643	0.99728	0.9975	0.99615	0.99926	0.99906	0.99288	0.99804	0.99619
0.99425	0.96986	0.94891	0.98752	0.9954	0.97171	0.98912	0.94907	0.99373	0.99142	0.98894	0.98936	0.97545	0.99381	0.99648	0.96271	0.99259	0.98759
0.94676	0.91697	0.9991	0.99536	0.99645	0.99541	0.99965	0.9991	0.99925	0.99638	0.99675	0.99695	0.99509	0.99838	0.99977	0.99904	0.99715	0.99648
0.98196	0.95349	0.96607	0.9962	0.99607	0.99548	0.99727	0.9722	0.99706	0.99656	0.99715	0.9972	0.99675	0.99909	0.99758	0.98139	0.99791	0.9975
0.98038	0.94366	0.97788	0.99538	0.99821	0.99483	0.99828	0.9809	0.99832	0.99683	0.99765	0.99782	0.9968	0.99956	0.99874	0.99013	0.99845	0.99724
0.99409	0.96374	0.96313	0.99237	0.99867	0.98321	0.99523	0.96444	0.99821	0.99617	0.99499	0.99532	0.98698	0.99773	0.99858	0.978	0.99676	0.99288
0.99647	0.97388	0.94823	0.99634	0.99717	0.98726	0.99503	0.95454	0.99788	0.99766	0.99695	0.9971	0.98903	0.99833	0.99802	0.96638	0.9979	0.99528
0.99328	0.9644	0.96076	0.9959	0.9987	0.98936	0.99644	0.96503	0.99863	0.99752	0.99728	0.99746	0.9916	0.9987	0.99871	0.97673	0.99798	0.99522
0.99368	0.96762	0.95521	0.99632	0.99747	0.98994	0.99613	0.9617	0.99809	0.99757	0.99729	0.99742	0.99173	0.99859	0.99793	0.97256	0.99793	0.99589
0.99836	0.98812	0.91724	0.99374	0.9926	0.97892	0.99009	0.92424	0.99434	0.99634	0.99402	0.99415	0.98063	0.99823	0.99498	0.93622	0.9976	0.99665
0.97172	0.93088	0.9855	0.9941	0.99777	0.99455	0.99835	0.98754	0.99809	0.99568	0.99683	0.99708	0.99659	0.99949	0.99882	0.99468	0.99784	0.99651
0.99583	0.97164	0.95069	0.99658	0.99765	0.98818	0.99545	0.95671	0.99822	0.99799	0.99732	0.99745	0.99002	0.99861	0.99821	0.9682	0.99823	0.99572
0.99369	0.97129	0.94901	0.99669	0.9959	0.99026	0.99573	0.95734	0.99754	0.99755	0.99725	0.99735	0.99166	0.99835	0.9974	0.96786	0.9978	0.9962
0.9874	0.98485	0.89526	0.99374	0.97697	0.98784	0.99163	0.91485	0.98612	0.99367	0.99367	0.99367	0.98773	0.99293	0.99243	0.92494	0.99213	0.99717
0.99598	0.98129	0.93153	0.99699	0.99237	0.98809	0.9939	0.94281	0.99591	0.99786	0.99714	0.99718	0.98897	0.99822	0.99669	0.95375	0.99795	0.99695
0.99644	0.97227	0.94974	0.99277	0.99755	0.98019	0.99207	0.95187	0.99658	0.9957	0.99407	0.99438	0.9831	0.99657	0.99766	0.9644	0.99608	0.99181
0.99048	0.98495	0.90366	0.9947	0.98118	0.98768	0.99237	0.92367	0.98851	0.99445	0.99464	0.99464	0.9879	0.99073	0.99274	0.93471	0.9935	0.99691
0.98555	0.97386	0.92733	0.99542	0.98347	0.99269	0.99515	0.94323	0.98951	0.99537	0.99537	0.99537	0.99285	0.98454	0.99514	0.95453	0.99511	0.99679
0.98551	0.97317	0.92799	0.99472	0.98336	0.99237	0.99451	0.94453	0.98964	0.99466	0.99466	0.99466	0.99271	0.98341	0.99431	0.95522	0.99473	0.99614
0.97854	0.98853	0.84952	0.98063	0.96499	0.96861	0.97473	0.86001	0.97341	0.98055	0.98041	0.98041	0.96749	0.98877	0.97835	0.8679	0.97965	0.9874
0.96839	0.97091	0.8941	0.96063	0.97637	0.92772	0.95949	0.88471	0.97073	0.97131	0.9624	0.96351	0.93406	0.98395	0.98749	0.89471	0.98184	0.96407
0.98538	0.97327	0.92866	0.99521	0.98359	0.99258	0.99489	0.94471	0.98976	0.99515	0.99515	0.99515	0.9928	0.98406	0.99491	0.95578	0.99512	0.99644
0.98256	0.97617	0.90739	0.99166	0.97473	0.99054	0.9925	0.93039	0.98372	0.99157	0.99157	0.99157	0.99039	0.987	0.99193	0.94094	0.99084	0.99462
0.98534	0.98356	0.89392	0.97857	0.98367	0.95289	0.97526	0.8893	0.98114	0.98347	0.97846	0.97881	0.95669	0.99109	0.98753	0.89994	0.98877	0.98193
0.98643	0.97752	0.91269	0.993	0.98	0.99112	0.99275	0.93272	0.98754	0.99293	0.99293	0.99293	0.99071	0.98561	0.99201	0.94212	0.99255	0.99531
0.98737	0.97228	0.93124	0.99317	0.98544	0.99085	0.9927	0.94786	0.99092	0.99309	0.99309	0.99309	0.99182	0.99411	0.99241	0.95686	0.99356	0.99479
0.98284	0.98477	0.87521	0.98874	0.96867	0.98405	0.98767	0.9014	0.97981	0.98861	0.98861	0.98861	0.98346	0.99147	0.98756	0.88157	0.98659	0.99409
0.98715	0.98691	0.89537	0.98252	0.98542	0.95881	0.97812	0.89221	0.9839	0.98637	0.98215	0.98238	0.96086	0.99403	0.98892	0.90381	0.99107	0.98515
0.99291	0.96709	0.95523	0.98471	0.99482	0.97694	0.99319	0.95663	0.99554	0.99459	0.99212	0.99272	0.9847	0.9959	0.9938	0.96803	0.99541	0.99323
0.99856	0.98564	0.92265	0.9928	0.99344	0.97715	0.98967	0.92639	0.99383	0.99561	0.99302	0.99317	0.97923	0.99733	0.99506	0.9392	0.9971	0.99529
0.9904	0.97295	0.9361	0.98084	0.99152	0.96045	0.98429	0.93361	0.98927	0.98657	0.98201	0.98241	0.96477	0.99305	0.99171	0.95009	0.99165	0.98464
0.98746	0.99142	0.87866	0.9877	0.97749	0.97242	0.98278	0.89178	0.98326	0.98775	0.98669	0.98664	0.973	0.99358	0.98609	0.90137	0.98815	0.99124
0.98275	0.95406	0.98752	0.98331	0.99101	0.98097	0.99703	0.98819	0.99682	0.98914	0.98929	0.99004	0.98656	0.99675	0.99938	0.99591	0.99131	0.98847
0.99831	0.98943	0.92253	0.99636	0.99386	0.98402	0.99389	0.93045	0.99633	0.99811	0.99668	0.99672	0.98625	0.99906	0.99598	0.94247	0.99897	0.9987
0.99213	0.98634	0.90486	0.99492	0.98273	0.98688	0.99221	0.92328	0.98957	0.99487	0.99487	0.99487	0.98738	0.99591	0.99284	0.93372	0.99413	0.997
0.9504	0.94787	0.90564	0.94068	0.9668	0.9	0.9543	0.89694	0.96208	0.95782	0.94622	0.94836	0.91723	0.97486	0.99044	0.90848	0.97355	0.94725

## Sheet: RMSE 
Data For LDM
JAKY1	LOGL2	LOGI2	LOGN2	VANH2	VANZ2	FRED3	LOGI3	MLOG3	ONLG3	ORLG3	SHCA3	VANZ3	ANDE4	FRED4	GOMP4	LOGI4	VANG4
0.1076	0.15292	0.06214	0.02465	0.0126	0.042	0.01891	0.05782	0.01458	0.02272	0.02086	0.02034	0.03271	0.01953	0.00866	0.03848	0.02157	0.02892
0.1194	0.16504	0.05574	0.02718	0.01254	0.04261	0.01869	0.05286	0.01416	0.02487	0.02203	0.02134	0.03207	0.02082	0.00716	0.03253	0.02409	0.07743
0.0727	0.11586	0.08395	0.01706	0.02309	0.03738	0.018	0.07146	0.01989	0.01615	0.01636	0.0162	0.03011	0.01313	0.01255	0.05713	0.01477	0.02255
0.1212	0.16474	0.04539	0.03831	0.02212	0.04965	0.01952	0.04323	0.01778	0.03386	0.02926	0.02831	0.03532	0.02255	0.00906	0.02338	0.03448	0.03414
0.1147	0.15912	0.05346	0.03328	0.01826	0.04743	0.02105	0.04993	0.01862	0.0309	0.0273	0.02659	0.03545	0.02289	0.01132	0.0302	0.03022	0.03365
0.1309	0.17303	0.03857	0.04038	0.02583	0.04777	0.01809	0.03605	0.01875	0.03631	0.02973	0.02873	0.03255	0.02066	0.01103	0.02053	0.03713	0.03279
0.1149	0.15647	0.05269	0.03316	0.02153	0.04042	0.01849	0.04569	0.02127	0.03131	0.02614	0.0255	0.02682	0.01348	0.01631	0.03091	0.02926	0.0266
0.1207	0.16069	0.04469	0.02786	0.01673	0.03295	0.01072	0.04281	0.01156	0.02057	0.01763	0.01687	0.02213	0.01568	0.00912	0.02271	0.02384	0.02027
0.1329	0.17056	0.02456	0.0325	0.02413	0.035	0.00841	0.02472	0.01019	0.02437	0.02061	0.01987	0.035	0.0161	0.0061	0.01948	0.02966	0.02204
0.141	0.17636	0.01591	0.02745	0.02232	0.02894	0.00763	0.01615	0.00897	0.0197	0.01609	0.01545	0.02894	0.01681	0.00706	0.01963	0.02579	0.01768
0.0967	0.14262	0.06849	0.02453	0.01282	0.04513	0.02182	0.0663	0.01503	0.02037	0.02111	0.02063	0.0369	0.02264	0.01098	0.04586	0.02101	0.03065
0.0682	0.11413	0.07735	0.04279	0.02706	0.06632	0.03614	0.07753	0.02918	0.03458	0.03832	0.03771	0.05545	0.03347	0.02097	0.06066	0.03492	0.04455
0.0549	0.09961	0.06374	0.04952	0.02763	0.06844	0.02836	0.06229	0.02353	0.03602	0.03928	0.03831	0.05116	0.02665	0.01388	0.04129	0.03309	0.0423
0.0596	0.10411	0.07943	0.0476	0.03067	0.07108	0.03898	0.0799	0.03245	0.03819	0.04268	0.04206	0.05959	0.03524	0.02448	0.06278	0.03689	0.04699
0.0924	0.13848	0.09207	0.01023	0.03191	0.02703	0.01623	0.08221	0.02713	0.01023	0.01023	0.01023	0.02478	0.05246	0.01113	0.07001	0.01447	0.04924
0.0786	0.12225	0.10356	0.01636	0.04034	0.02885	0.01999	0.09014	0.03336	0.01636	0.01636	0.01636	0.02768	0.04345	0.01675	0.0795	0.0205	0.01384
0.1059	0.15254	0.09031	0.01226	0.03384	0.02223	0.01429	0.08125	0.02959	0.01226	0.01226	0.01226	0.02093	0.05462	0.01087	0.06924	0.01944	0.03661
0.0622	0.11015	0.09247	0.03198	0.03041	0.05709	0.03699	0.09112	0.03101	0.02802	0.03149	0.03129	0.05196	0.03015	0.02443	0.07796	0.02809	0.03692
0.0632	0.10774	0.07331	0.03581	0.01886	0.05846	0.02805	0.07	0.0217	0.02845	0.03101	0.03042	0.04739	0.02498	0.01501	0.0513	0.02835	0.03747
0.1088	0.1531	0.0532	0.03496	0.01755	0.04956	0.02013	0.05075	0.01602	0.02956	0.02737	0.02652	0.03643	0.02169	0.00751	0.03047	0.03018	0.03356
0.0976	0.13869	0.04062	0.05388	0.03701	0.06246	0.02196	0.0387	0.02352	0.04347	0.03863	0.0374	0.04163	0.02558	0.01073	0.02382	0.04853	0.04106
0.1319	0.17014	0.02139	0.0437	0.03487	0.04615	0.01201	0.0219	0.01488	0.03302	0.02765	0.02665	0.04615	0.02027	0.00671	0.01826	0.04099	0.02895
0.1421	0.17793	0.01622	0.02932	0.02414	0.03062	0.00853	0.01656	0.01018	0.02101	0.0167	0.01596	0.03062	0.01664	0.0079	0.02074	0.02767	0.01807
0.1389	0.17534	0.01636	0.03209	0.02587	0.03382	0.0078	0.01698	0.00948	0.02333	0.01911	0.01835	0.03382	0.01673	0.00627	0.01857	0.03012	0.02058
0.1344	0.17513	0.04811	0.03014	0.02134	0.03089	0.01812	0.03986	0.02194	0.02958	0.02451	0.02404	0.02088	0.00985	0.01749	0.02686	0.0247	0.09215
0.1128	0.15845	0.06475	0.0182	0.0121	0.03488	0.01512	0.0594	0.01303	0.01728	0.01537	0.01495	0.02669	0.01505	0.00663	0.04102	0.01516	0.07013
0.1101	0.15343	0.04972	0.03449	0.01675	0.04708	0.01693	0.0484	0.01236	0.02732	0.0254	0.02451	0.03382	0.02016	0.00424	0.02462	0.02931	0.03104
0.0922	0.13249	0.05382	0.03573	0.02056	0.04492	0.01759	0.04624	0.01941	0.03116	0.02708	0.02633	0.03048	0.01448	0.0139	0.02759	0.03088	0.02948
0.1008	0.14434	0.05389	0.03525	0.01719	0.04965	0.01909	0.05076	0.0155	0.02925	0.02701	0.02613	0.03586	0.02006	0.00712	0.02981	0.03003	0.03271
0.1014	0.1442	0.05566	0.0327	0.01676	0.04589	0.0178	0.05042	0.01676	0.02861	0.02535	0.02459	0.03266	0.01714	0.01076	0.03171	0.02803	0.03006
0.0308	0.0749	0.09414	0.03935	0.02933	0.06635	0.03927	0.08996	0.03273	0.03246	0.03754	0.0372	0.0587	0.02732	0.02523	0.07686	0.02832	0.03659
0.1101	0.14694	0.02071	0.04586	0.0379	0.04892	0.01258	0.02116	0.01595	0.03434	0.032	0.03132	0.04892	0.02304	0.00634	0.01274	0.03024	0.03356
0.0898	0.12759	0.0257	0.05289	0.04302	0.05583	0.0151	0.02539	0.02055	0.03831	0.03453	0.03361	0.05583	0.02	0.00928	0.02131	0.04885	0.0351
0.0856	0.12466	0.03187	0.05199	0.03933	0.05688	0.01641	0.03074	0.02043	0.03909	0.03601	0.03511	0.03822	0.02085	0.00868	0.02558	0.04694	0.03714
0.0998	0.13499	0.01886	0.03564	0.02872	0.03761	0.00846	0.01824	0.0114	0.02617	0.02353	0.02299	0.02515	0.01453	0.00605	0.01514	0.03311	0.02461
0.1005	0.13666	0.02246	0.03792	0.02957	0.04002	0.00943	0.02113	0.01301	0.02879	0.02534	0.02471	0.02658	0.01406	0.00626	0.01528	0.03509	0.02633
0.086	0.12642	0.03594	0.05351	0.03897	0.06057	0.01871	0.0352	0.02081	0.0404	0.03786	0.03689	0.0416	0.02455	0.00795	0.02046	0.04785	0.03997
0.0609	0.10835	0.08481	0.02695	0.01983	0.05296	0.02795	0.08059	0.02098	0.02073	0.02472	0.02432	0.04476	0.02187	0.01589	0.06571	0.02041	0.03162
0.0621	0.10667	0.06733	0.03705	0.01637	0.05668	0.02262	0.06239	0.01736	0.02762	0.02926	0.02841	0.04196	0.01932	0.00894	0.04335	0.02834	0.03446
0.075	0.11802	0.06245	0.0334	0.01486	0.04742	0.01611	0.05677	0.01386	0.02528	0.02421	0.02333	0.03268	0.01431	0.00817	0.03585	0.02637	0.02822
0.0354	0.04904	0.11779	0.02985	0.04369	0.03865	0.02841	0.07835	0.0365	0.02898	0.02919	0.02918	0.03321	0.03009	0.02822	0.06649	0.02857	0.02519
0.1193	0.15698	0.02806	0.03933	0.03147	0.04533	0.01716	0.029	0.01476	0.03097	0.02997	0.02954	0.04533	0.02849	0.01531	0.00631	0.03717	0.03405
0.1315	0.16813	0.02142	0.03153	0.02458	0.03573	0.01038	0.0221	0.00842	0.02381	0.02199	0.0215	0.03573	0.02236	0.00906	0.01054	0.02962	0.02545
0.1303	0.1695	0.02673	0.03921	0.02852	0.04336	0.01148	0.02735	0.01172	0.02965	0.02531	0.02435	0.02834	0.01984	0.0048	0.01561	0.0359	0.02762
0.0699	0.11302	0.06469	0.0317	0.01237	0.04762	0.0165	0.05826	0.01296	0.02366	0.02348	0.02266	0.03375	0.01353	0.00687	0.03778	0.02427	0.02825
0.072	0.1163	0.10157	0.01555	0.03685	0.03477	0.02306	0.09193	0.03099	0.01555	0.01555	0.01555	0.03311	0.04214	0.01754	0.08055	0.01992	0.01772
0.0639	0.10637	0.05042	0.04271	0.02546	0.05414	0.01846	0.0489	0.01479	0.02966	0.03127	0.03053	0.04008	0.01961	0.01123	0.02015	0.03419	0.03384
0.0785	0.11727	0.03397	0.04333	0.03086	0.04957	0.01352	0.03306	0.01431	0.03212	0.03178	0.03119	0.03631	0.01801	0.00716	0.01667	0.03767	0.03334
0.0763	0.11481	0.05192	0.04139	0.02535	0.0492	0.02057	0.04399	0.02144	0.03598	0.03155	0.03082	0.03502	0.02214	0.01676	0.02009	0.03688	0.03471
0.1094	0.14945	0.03416	0.0418	0.02817	0.04774	0.01327	0.0336	0.01333	0.03204	0.02825	0.0273	0.03186	0.01906	0.00393	0.01497	0.03746	0.03086
0.0542	0.0969	0.09014	0.01777	0.02197	0.04107	0.01942	0.07675	0.01861	0.01478	0.01648	0.01626	0.03363	0.01192	0.01311	0.06319	0.0135	0.02224
0.08	0.12093	0.07224	0.02542	0.01876	0.03934	0.01698	0.05999	0.01837	0.02359	0.02168	0.02129	0.02825	0.01194	0.01424	0.04447	0.02089	0.02444
0.1038	0.14334	0.05915	0.02969	0.02033	0.03598	0.01878	0.04837	0.0213	0.02875	0.02531	0.0249	0.02576	0.01311	0.01734	0.03102	0.02473	0.0256
0.1385	0.17874	0.03032	0.03605	0.02383	0.04135	0.01175	0.02993	0.0114	0.0295	0.02467	0.02379	0.04135	0.01833	0.00349	0.01571	0.0326	0.02743
0.1433	0.18221	0.02528	0.03381	0.02378	0.03721	0.00922	0.02495	0.01035	0.02722	0.02187	0.02102	0.03721	0.01617	0.0036	0.01693	0.03088	0.02382
0.1241	0.16384	0.03879	0.03205	0.0186	0.03744	0.01102	0.03558	0.01223	0.02734	0.02201	0.02121	0.02485	0.01354	0.00627	0.01726	0.02833	0.02462
0.1349	0.17607	0.04386	0.99595	0.01856	0.03352	0.01519	0.03806	0.01811	0.02868	0.0229	0.02227	0.02233	0.01176	0.01345	0.02264	0.02607	0.09274
0.1146	0.15482	0.04683	0.03211	0.01791	0.03906	0.01488	0.04113	0.01611	0.02908	0.02396	0.02326	0.02678	0.0146	0.01115	0.02057	0.02813	0.02673
0.1316	0.17154	0.03286	0.03785	0.02481	0.04303	0.01329	0.03105	0.01416	0.03238	0.02624	0.02532	0.04303	0.01777	0.00676	0.01694	0.03458	0.02889
0.149	0.18503	0.0159	0.02952	0.02391	0.0303	0.00766	0.01578	0.0113	0.0225	0.01716	0.01642	0.0303	0.01304	0.00687	0.02169	0.02748	0.01755
0.0791	0.12475	0.08345	0.01423	0.02115	0.03814	0.01938	0.07553	0.01892	0.01275	0.01386	0.01373	0.0325	0.01534	0.01098	0.06025	0.01327	0.02309
0.0926	0.13758	0.06721	0.02593	0.01417	0.0456	0.02103	0.06213	0.01614	0.02303	0.02232	0.02181	0.03604	0.02007	0.0103	0.04375	0.02218	0.03052
0.085	0.13011	0.08023	0.01406	0.02016	0.03585	0.01733	0.07188	0.01815	0.01298	0.01346	0.01331	0.02971	0.01418	0.00984	0.05582	0.01262	0.02207
0.0947	0.13912	0.09214	0.01486	0.03488	0.02407	0.01543	0.07994	0.03025	0.01486	0.01486	0.01486	0.02259	0.05601	0.01358	0.06675	0.01639	0.05008
0.0635	0.10687	0.07847	0.02133	0.01202	0.04026	0.01496	0.06858	0.01124	0.01483	0.01592	0.01528	0.0295	0.00941	0.00846	0.05134	0.01384	0.02141
0.0863	0.13097	0.09967	0.01476	0.03805	0.02749	0.01862	0.0894	0.03231	0.01476	0.01476	0.01476	0.02661	0.04629	0.015	0.07773	0.02561	0.01392
0.0796	0.1257	0.08417	0.01681	0.02411	0.04021	0.02249	0.07646	0.02183	0.01594	0.01676	0.01668	0.03524	0.05668	0.01306	0.06212	0.01679	0.02575
0.1038	0.14666	0.06272	0.02668	0.01777	0.0385	0.0179	0.05418	0.0186	0.0256	0.02281	0.02236	0.0277	0.01456	0.01454	0.03748	0.02276	0.026
0.1233	0.16443	0.05133	0.03107	0.02098	0.035	0.01861	0.04317	0.02153	0.03014	0.02544	0.02492	0.02399	0.01239	0.01732	0.02781	0.02633	0.08415
0.1174	0.16059	0.05701	0.02797	0.01789	0.03732	0.01845	0.04949	0.01917	0.02738	0.0239	0.02342	0.02698	0.17675	0.01514	0.03199	0.02427	0.07718
0.0842	0.12846	0.05756	0.04844	0.02964	0.06512	0.02822	0.0583	0.02331	0.03736	0.03882	0.03792	0.04974	0.03124	0.01481	0.03496	0.04066	0.04407
0.0798	0.12127	0.04438	0.0459	0.02898	0.05561	0.01788	0.04227	0.01721	0.03469	0.03296	0.03205	0.03873	0.02101	0.00806	0.01905	0.03958	0.03601
0.1191	0.1582	0.0274	0.04204	0.03149	0.04706	0.01346	0.02827	0.01287	0.03143	0.02854	0.02772	0.04706	0.02294	0.00731	0.01179	0.03864	0.03139
0.114	0.1565	0.0449	0.03671	0.0202	0.04697	0.01564	0.04415	0.01224	0.02841	0.0262	0.02526	0.03291	0.0199	0.00491	0.02033	0.03153	0.03067
0.0914	0.13038	0.07145	0.02596	0.02426	0.03152	0.01777	0.05654	0.02394	0.02541	0.02313	0.02288	0.02159	0.01004	0.0172	0.04126	0.02075	0.0206
0.0999	0.14328	0.06315	0.02558	0.01382	0.04008	0.01589	0.05609	0.01481	0.02321	0.02056	0.02001	0.029	0.01379	0.01043	0.03868	0.02113	0.0256
0.0591	0.10315	0.06464	0.0332	0.01352	0.0486	0.01744	0.06082	0.0114	0.02202	0.0242	0.02346	0.03625	0.01574	0.01073	0.03512	0.01929	0.02808
0.0887	0.122	0.0279	0.02047	0.01508	0.02424	0.00794	0.02598	0.00781	0.01339	0.0131	0.01277	0.01758	0.01534	0.0078	0.02231	0.01798	0.0152
0.0796	0.11247	0.02511	0.02381	0.01766	0.0283	0.00985	0.02431	0.00587	0.01773	0.01865	0.01853	0.0283	0.01504	0.00939	0.01557	0.02056	0.02027
0.0908	0.12307	0.02129	0.02182	0.01636	0.02424	0.00568	0.0195	0.00691	0.01481	0.0143	0.014	0.01716	0.01241	0.00545	0.02139	0.01917	0.01539
0.1137	0.15244	0.04261	0.03542	0.02368	0.03884	0.01567	0.03669	0.01991	0.03136	0.0253	0.0246	0.03884	0.01045	0.01418	0.02573	0.03141	0.02485
0.1499	0.18633	0.01964	0.02972	0.02374	0.03021	0.00937	0.0189	0.01354	0.02382	0.01787	0.01714	0.03021	0.01211	0.00873	0.02411	0.02755	0.01766
0.1381	0.17729	0.02574	0.04156	0.03091	0.04474	0.01262	0.02544	0.01554	0.03361	0.02712	0.0261	0.04474	0.0174	0.00757	0.02052	0.03832	0.02827
0.1443	0.18237	0.02447	0.03233	0.02384	0.0342	0.00917	0.02378	0.01289	0.02614	0.02014	0.01932	0.0342	0.01299	0.00723	0.02286	0.0295	0.0207
0.0991	0.14312	0.07113	0.01833	0.01756	0.03413	0.01569	0.06259	0.01715	0.01769	0.01677	0.01653	0.02669	0.0136	0.01107	0.04504	0.01522	0.06121
0.0817	0.127	0.07246	0.02393	0.0133	0.04509	0.01986	0.06604	0.01428	0.01942	0.02015	0.0196	0.03491	0.01664	0.00865	0.04927	0.01877	0.02818
0.0527	0.09748	0.07213	0.0436	0.02409	0.06708	0.03165	0.06738	0.02608	0.03417	0.03708	0.03623	0.05188	0.02736	0.01513	0.05215	0.03404	0.0419
0.0507	0.09323	0.08966	0.01997	0.02423	0.04421	0.02173	0.0765	0.02047	0.01744	0.0189	0.01867	0.03619	0.0145	0.01393	0.06298	0.01631	0.02466
0.1017	0.14653	0.06746	0.0212	0.01501	0.03832	0.01753	0.06048	0.01573	0.02033	0.01878	0.01841	0.02976	0.01631	0.01046	0.04284	0.01838	0.06388
0.0941	0.13755	0.07621	0.0185	0.02301	0.03239	0.01658	0.06496	0.02124	0.0184	0.01772	0.01759	0.02527	0.01276	0.01385	0.04949	0.01577	0.02136
0.0915	0.13623	0.07336	0.01694	0.01336	0.03734	0.01637	0.0668	0.01333	0.01441	0.01459	0.01425	0.03006	0.01449	0.00792	0.04879	0.01341	0.02367
0.1106	0.15423	0.05378	0.02953	0.01208	0.04251	0.01537	0.05088	0.01114	0.02414	0.02182	0.021	0.03035	0.01673	0.00427	0.02922	0.0245	0.02758
0.1157	0.15863	0.04966	0.03035	0.0132	0.04171	0.01421	0.04751	0.01007	0.0245	0.0217	0.02084	0.02939	0.01711	0.00314	0.02414	0.02556	0.02712
0.1352	0.171	0.01351	0.03412	0.02827	0.03629	0.00822	0.0142	0.00911	0.02506	0.02175	0.02113	0.03629	0.01927	0.00575	0.01341	0.03243	0.02379
0.1151	0.15575	0.03827	0.03913	0.02614	0.04743	0.01657	0.03913	0.01277	0.02963	0.02807	0.02729	0.03487	0.02482	0.01069	0.00837	0.03501	0.03262
0.1252	0.16634	0.03794	0.03637	0.02157	0.04402	0.01392	0.03684	0.01175	0.02993	0.02532	0.02438	0.03024	0.01964	0.00375	0.01368	0.03259	0.02952
0.1488	0.18472	0.01358	0.03187	0.02651	0.03266	0.00787	0.01411	0.01127	0.02399	0.01853	0.01775	0.03266	0.01412	0.00679	0.02007	0.03003	0.01907
0.1499	0.18564	0.01206	0.03328	0.02789	0.0342	0.00726	0.01262	0.0105	0.02508	0.0199	0.01914	0.0342	0.01542	0.00541	0.01786	0.03156	0.02069
0.1515	0.18628	0.01129	0.03111	0.02682	0.03148	0.00812	0.01173	0.01114	0.02311	0.01792	0.0172	0.03148	0.01449	0.00744	0.01926	0.02965	0.01833
0.1499	0.18479	0.0108	0.03139	0.02667	0.03197	0.0071	0.01129	0.01027	0.02347	0.01874	0.01806	0.03197	0.01495	0.00607	0.01821	0.02983	0.01932
0.0935	0.1384	0.06256	0.03258	0.01578	0.05145	0.02315	0.05993	0.01745	0.02701	0.0273	0.02666	0.04047	0.02338	0.00993	0.0397	0.02744	0.0351
0.1143	0.15819	0.04622	0.04294	0.02564	0.05593	0.02213	0.04622	0.01823	0.03494	0.03297	0.03197	0.04085	0.02671	0.00717	0.02355	0.03784	0.03839
0.109	0.15122	0.04759	0.03703	0.01989	0.04836	0.01746	0.04527	0.01486	0.03097	0.02792	0.02707	0.03473	0.02022	0.00645	0.0225	0.0324	0.03293
0.1261	0.16729	0.0361	0.03899	0.02463	0.04642	0.01454	0.03581	0.01289	0.03106	0.02739	0.02644	0.032	0.02016	0.00404	0.01579	0.03464	0.03076
0.0918	0.13797	0.07368	0.01959	0.01525	0.04188	0.02081	0.06903	0.01562	0.01723	0.01778	0.01744	0.03475	0.01956	0.00957	0.05123	0.01715	0.02774
0.1029	0.15077	0.08163	0.00794	0.02358	0.03082	0.01714	0.07593	0.02106	0.00794	0.00794	0.00794	0.02692	0.06051	0.00888	0.06212	0.01143	0.04731
0.094	0.13976	0.08872	0.0089	0.02995	0.0257	0.01425	0.07913	0.02601	0.0089	0.0089	0.0089	0.02328	0.05377	0.00874	0.06576	0.01311	0.05088
0.076	0.12199	0.08619	0.0137	0.02288	0.0385	0.0204	0.07867	0.0203	0.01221	0.01355	0.01346	0.03343	0.01581	0.01187	0.0638	0.01344	0.02279
0.11238	0.15291	0.04702	0.03418	0.01948	0.0419	0.01569	0.04152	0.01704	0.0307	0.02555	0.0248	0.02868	0.01509	0.0113	0.02215	0.03017	0.02843
0.1156	0.15616	0.03879	0.03941	0.0244	0.04657	0.01454	0.03709	0.01418	0.03224	0.02788	0.02696	0.03171	0.01819	0.00561	0.01682	0.03511	0.03098
0.0812	0.12754	0.07902	0.01876	0.01643	0.04279	0.02094	0.07367	0.01633	0.01508	0.01713	0.01682	0.03585	0.01785	0.01079	0.05715	0.01537	0.02678
0.0982	0.1452	0.07297	0.01752	0.01545	0.03986	0.01994	0.06848	0.01554	0.01519	0.01597	0.01564	0.03288	0.01881	0.00767	0.05168	0.01546	0.02646
0.1027	0.14735	0.06782	0.02021	0.01539	0.03659	0.01656	0.06039	0.01583	0.01961	0.01802	0.01769	0.0283	0.01511	0.01058	0.04288	0.01737	0.02452
0.0936	0.13753	0.09073	0.01561	0.03511	0.02232	0.01401	0.07704	0.03058	0.01561	0.01561	0.01561	0.02062	0.05443	0.01178	0.06394	0.01611	0.04085
0.0709	0.11699	0.09278	0.01541	0.02972	0.03986	0.02384	0.08462	0.02596	0.01482	0.01541	0.01541	0.03632	0.04764	0.01482	0.07214	0.01725	0.0233
0.0875	0.13319	0.06951	0.02987	0.01865	0.05133	0.02611	0.06468	0.02086	0.02697	0.02676	0.02625	0.04156	0.02462	0.01344	0.04833	0.02637	0.0352
0.0975	0.14305	0.06687	0.02587	0.01601	0.04537	0.02205	0.06163	0.01775	0.02423	0.02294	0.02248	0.03608	0.02145	0.01139	0.04417	0.02316	0.03124
0.1046	0.14913	0.05963	0.02954	0.01558	0.04541	0.0198	0.05446	0.01723	0.0272	0.02441	0.02376	0.03383	0.01957	0.01107	0.03623	0.02592	0.03082
0.0916	0.13488	0.07115	0.02472	0.02049	0.03967	0.01918	0.06093	0.01987	0.02357	0.02211	0.02175	0.02942	0.0153	0.01564	0.04611	0.02093	0.0259
0.1027	0.14741	0.06224	0.02669	0.01356	0.04308	0.0181	0.05675	0.01509	0.02402	0.02173	0.0211	0.03206	0.01725	0.00966	0.03934	0.02247	0.02838
0.0691	0.11229	0.07361	0.02886	0.01655	0.05011	0.02314	0.06612	0.01874	0.02499	0.02528	0.0248	0.0399	0.0202	0.01291	0.04858	0.02409	0.03268
0.1201	0.15979	0.02708	0.05434	0.04263	0.05906	0.01757	0.02769	0.02037	0.04153	0.03657	0.03542	0.03909	0.02705	0.00553	0.02702	0.05062	0.03858
0.1358	0.17188	0.01406	0.03864	0.03257	0.0405	0.00914	0.01443	0.01163	0.02869	0.02456	0.02384	0.02643	0.02016	0.00543	0.01381	0.03696	0.02624
0.14	0.17533	0.01155	0.03401	0.02887	0.03553	0.00784	0.01206	0.00968	0.02488	0.02097	0.02031	0.03553	0.01857	0.00589	0.01469	0.03258	0.02261
0.1454	0.17964	0.01004	0.0263	0.02197	0.02793	0.00682	0.01056	0.00695	0.01906	0.01614	0.01564	0.02793	0.01831	0.0063	0.01635	0.02506	0.01814
0.0876	0.13394	0.06861	0.03421	0.01958	0.05619	0.02879	0.067	0.02221	0.02879	0.03024	0.02966	0.04615	0.02827	0.01359	0.04883	0.02938	0.03892
0.0913	0.13625	0.05949	0.04269	0.02457	0.06157	0.02862	0.05797	0.02371	0.03578	0.03586	0.03504	0.04776	0.0296	0.01239	0.03944	0.03688	0.04274
0.1339	0.1735	0.02768	0.04017	0.02876	0.0443	0.01222	0.02776	0.01332	0.03163	0.02656	0.02558	0.0443	0.01834	0.00514	0.0235	0.03661	0.0284
0.14611	0.18156	0.01191	0.03377	0.02878	0.03456	0.00807	0.01246	0.01095	0.02489	0.01993	0.01918	0.03456	0.01628	0.00683	0.01838	0.03224	0.02074
0.1441	0.1792	0.01137	0.03189	0.02718	0.03287	0.00805	0.01203	0.01004	0.02317	0.0188	0.0181	0.02004	0.017	0.00711	0.01792	0.03051	0.01998
0.0804	0.12488	0.08032	0.01799	0.02121	0.03912	0.01938	0.07105	0.01912	0.01662	0.01716	0.01698	0.03238	0.01579	0.01262	0.05562	0.0158	0.02472
0.1034	0.14655	0.05929	0.02818	0.01471	0.04198	0.01706	0.05312	0.01596	0.02574	0.02277	0.02218	0.03065	0.01594	0.01108	0.03474	0.02413	0.02787
0.1006	0.14518	0.06721	0.02292	0.01608	0.0397	0.01876	0.06012	0.01704	0.02209	0.02057	0.02021	0.0311	0.01766	0.01215	0.04243	0.02024	0.02741
0.0774	0.12419	0.09051	0.0141	0.0284	0.03852	0.02302	0.08364	0.02491	0.01359	0.0141	0.0141	0.03504	0.05038	0.01334	0.07061	0.01618	0.02313
0.0998	0.14633	0.07744	0.01039	0.01924	0.0324	0.01599	0.07079	0.0178	0.00979	0.01009	0.00997	0.02701	0.01428	0.0068	0.05499	0.01018	0.05786
0.1151	0.15872	0.05439	0.028	0.01336	0.04078	0.01613	0.05004	0.01429	0.02558	0.02212	0.02148	0.02983	0.01706	0.00884	0.02995	0.02428	0.02771
0.1189	0.16492	0.06365	0.01816	0.01403	0.03387	0.01592	0.05821	0.01496	0.01819	0.01621	0.01587	0.02633	0.16893	0.00842	0.04032	0.01609	0.06972
0.0898	0.13547	0.0826	0.00898	0.02157	0.03161	0.01514	0.07439	0.01908	0.00842	0.00888	0.00882	0.02655	0.062	0.00796	0.05889	0.00943	0.01865
0.1095	0.15382	0.05854	0.02509	0.00927	0.03958	0.01498	0.05438	0.01073	0.02145	0.01898	0.01827	0.0286	0.01538	0.00497	0.03388	0.0205	0.0255
0.1193	0.16235	0.05109	0.02833	0.01332	0.03887	0.01457	0.04681	0.01345	0.0257	0.02142	0.0207	0.02729	0.01572	0.0083	0.02565	0.02458	0.02611
0.0825	0.12469	0.06651	0.02823	0.01491	0.04466	0.01826	0.05837	0.01636	0.02475	0.02328	0.02274	0.03352	0.01562	0.01176	0.04023	0.02077	0.02893
0.1262	0.16736	0.03543	0.0412	0.02687	0.04854	0.01557	0.03521	0.01445	0.03317	0.02935	0.0284	0.03361	0.0212	0.00483	0.01658	0.03688	0.03251
0.1166	0.15891	0.05045	0.02956	0.01446	0.03921	0.01383	0.04589	0.0138	0.02627	0.0218	0.02104	0.02683	0.01393	0.00823	0.02552	0.02533	0.02552
0.1231	0.16507	0.04946	0.02805	0.01505	0.03565	0.01379	0.04411	0.01512	0.02609	0.02126	0.02062	0.02418	0.01261	0.01044	0.02504	0.02422	0.02374
0.1234	0.16401	0.04208	0.03174	0.01726	0.0385	0.01227	0.03856	0.01268	0.0276	0.02223	0.02141	0.02584	0.01457	0.00688	0.01774	0.02792	0.0255
0.137	0.17569	0.02576	0.03436	0.02427	0.03828	0.00936	0.02588	0.00922	0.0266	0.02248	0.02167	0.03828	0.01749	0.00269	0.01554	0.03127	0.02483
0.1091	0.1502	0.05533	0.02639	0.01318	0.03526	0.01349	0.04838	0.014	0.02426	0.02012	0.01952	0.02428	0.01258	0.01002	0.02675	0.02199	0.02354
0.1096	0.15261	0.05119	0.03575	0.01976	0.04847	0.01966	0.04754	0.01831	0.03188	0.02833	0.02756	0.03546	0.02108	0.01113	0.02778	0.03176	0.03351
0.1299	0.17079	0.03514	0.03658	0.02289	0.04362	0.01335	0.03462	0.01186	0.02949	0.02567	0.0248	0.03029	0.0191	0.00409	0.01572	0.03256	0.02913
0.1391	0.17899	0.03319	0.03253	0.02125	0.0364	0.01099	0.03173	0.01373	0.02738	0.02175	0.02094	0.0364	0.01342	0.00819	0.02278	0.02886	0.02295
0.0816	0.12684	0.07784	0.01788	0.01748	0.04019	0.01881	0.06999	0.01618	0.01566	0.01626	0.01596	0.03254	0.01526	0.00979	0.0539	0.01481	0.02492
0.0904	0.13567	0.07518	0.01689	0.01684	0.03783	0.01751	0.06763	0.01587	0.01545	0.01535	0.01506	0.03042	0.01483	0.00877	0.05118	0.01422	0.02406
0.0948	0.13906	0.06912	0.0224	0.01571	0.03975	0.01777	0.06126	0.01623	0.0211	0.01967	0.01929	0.03053	0.01553	0.01162	0.04437	0.01787	0.02603
0.0558	0.08607	0.11592	0.02935	0.05142	0.03315	0.02644	0.0865	0.04233	0.02935	0.02935	0.02935	0.03097	0.02451	0.02664	0.07636	0.03026	0.02188
0.0772	0.12002	0.083	0.01606	0.02337	0.03462	0.0164	0.07029	0.02039	0.01571	0.01548	0.01535	0.02757	0.01165	0.01204	0.05543	0.01389	0.02108
0.0982	0.14414	0.06694	0.02408	0.01242	0.04379	0.01988	0.06252	0.01399	0.02031	0.02029	0.01973	0.03418	0.01891	0.00811	0.04474	0.01991	0.02892
0.1177	0.15914	0.03769	0.0431	0.02837	0.05106	0.01656	0.03827	0.01479	0.03331	0.03026	0.02925	0.03528	0.02341	0.00671	0.01504	0.03844	0.03373
0.1269	0.16643	0.03076	0.03684	0.0253	0.04165	0.01122	0.03108	0.01071	0.02794	0.02429	0.0234	0.04165	0.01877	0.00509	0.01855	0.03315	0.02676
0.1219	0.1619	0.03666	0.03723	0.02349	0.04274	0.01265	0.03451	0.01401	0.0308	0.02539	0.02446	0.02807	0.01534	0.00679	0.01902	0.03324	0.02772
0.1103	0.15119	0.04398	0.03861	0.02264	0.04714	0.01642	0.04042	0.01649	0.03299	0.02825	0.02734	0.03239	0.01812	0.00893	0.01992	0.03437	0.03178
0.0483	0.0922	0.06914	0.03585	0.01493	0.05452	0.02063	0.06282	0.01588	0.02574	0.02766	0.02688	0.04042	0.01686	0.01024	0.04219	0.02619	0.03164
0.0692	0.11129	0.06144	0.03393	0.01558	0.04891	0.01827	0.05658	0.01473	0.02617	0.02602	0.02535	0.03645	0.01806	0.01075	0.03233	0.02735	0.03098
0.1074	0.15033	0.06421	0.02291	0.0168	0.03402	0.01504	0.0555	0.0173	0.02222	0.01961	0.01923	0.02426	0.01124	0.01237	0.03878	0.01882	0.02209
0.1163	0.15489	0.05469	0.03179	0.02374	0.03263	0.02033	0.04306	0.02442	0.03125	0.02685	0.02645	0.02281	0.01025	0.01985	0.02921	0.02591	0.0228
0.1073	0.14542	0.05661	0.03208	0.02404	0.03348	0.02011	0.04425	0.0242	0.03097	0.02614	0.02569	0.02207	0.01018	0.01976	0.03025	0.02637	0.02213
0.1441	0.17912	0.01096	0.02926	0.02416	0.03079	0.0063	0.01165	0.00751	0.02149	0.01804	0.01746	0.03079	0.01716	0.00494	0.01613	0.02771	0.01965
0.1403	0.17402	0.00929	0.02728	0.02292	0.02916	0.00697	0.00984	0.00664	0.02022	0.01805	0.01766	0.02916	0.01934	0.00667	0.01392	0.0261	0.02014
0.1382	0.1729	0.01326	0.02659	0.02154	0.02856	0.00652	0.01363	0.0067	0.01924	0.01665	0.01616	0.02856	0.01771	0.00582	0.0165	0.025	0.01865
0.1262	0.16042	0.01621	0.03133	0.0263	0.03501	0.01316	0.01651	0.01031	0.02523	0.02463	0.02445	0.03501	0.02494	0.0122	0.00686	0.03015	0.02771
0.1223	0.15481	0.01187	0.03442	0.0297	0.0366	0.01056	0.01208	0.01154	0.02842	0.02758	0.0274	0.02988	0.0234	0.00951	0.00467	0.03312	0.02926
0.0717	0.10492	0.05905	0.03418	0.02796	0.03361	0.02425	0.04177	0.02857	0.03293	0.02925	0.029	0.03361	0.01449	0.02422	0.02735	0.02884	0.0253
0.1181	0.15819	0.03397	0.04005	0.02811	0.04726	0.01553	0.03488	0.01261	0.03042	0.02849	0.02773	0.03437	0.02466	0.00977	0.0084	0.03632	0.03255
0.1402	0.17509	0.01403	0.02733	0.02293	0.0293	0.00873	0.01455	0.00858	0.01942	0.01648	0.01592	0.0293	0.01931	0.00827	0.01738	0.02612	0.01886
0.1361	0.17024	0.01431	0.02481	0.02074	0.02651	0.0082	0.0146	0.00852	0.01731	0.0147	0.01419	0.02651	0.01765	0.00794	0.01926	0.02352	0.01674
0.1348	0.1676	0.00888	0.02672	0.02321	0.02905	0.00914	0.00895	0.00744	0.01988	0.01848	0.01818	0.02905	0.02134	0.0089	0.01209	0.02597	0.02106
0.1325	0.16547	0.01167	0.02525	0.02166	0.02817	0.01032	0.01188	0.0074	0.01913	0.01827	0.01805	0.02817	0.02195	0.01002	0.01237	0.01816	0.02126
0.1085	0.15207	0.05938	0.02311	0.00718	0.03634	0.01233	0.05574	0.00759	0.01773	0.01627	0.01554	0.02593	0.01423	0.00465	0.03391	0.01779	0.02242
0.1053	0.14927	0.05892	0.02558	0.00856	0.04072	0.0153	0.05536	0.01008	0.02088	0.01919	0.01847	0.02991	0.01635	0.00449	0.03357	0.02067	0.02618
0.1131	0.15562	0.04752	0.03318	0.01639	0.0439	0.01472	0.04562	0.01141	0.02608	0.0236	0.02271	0.03077	0.01754	0.00505	0.02331	0.02797	0.02834
0.1338	0.17422	0.03298	0.03465	0.02196	0.04116	0.01217	0.03263	0.01034	0.02773	0.02392	0.02309	0.04116	0.01895	0.00382	0.01465	0.03102	0.02754
0.1015	0.14216	0.04996	0.03683	0.02115	0.04615	0.01759	0.04406	0.01868	0.03237	0.02794	0.02715	0.03192	0.01665	0.01244	0.02488	0.03243	0.03115
0.1338	0.17269	0.02552	0.03767	0.02766	0.04095	0.01039	0.02595	0.01165	0.02869	0.02395	0.02301	0.04095	0.01763	0.00528	0.01836	0.03447	0.02562
0.1251	0.16607	0.0344	0.04089	0.02705	0.04823	0.01497	0.03475	0.01314	0.03196	0.02861	0.02766	0.03347	0.02224	0.0042	0.01349	0.03673	0.03219
0.1006	0.13812	0.05965	0.03268	0.02525	0.03431	0.02166	0.04629	0.02579	0.03173	0.02795	0.02758	0.0242	0.01169	0.02134	0.03196	0.02704	0.0242
0.102	0.14565	0.06759	0.0221	0.01736	0.03623	0.01705	0.0589	0.01777	0.02146	0.0199	0.01959	0.02765	0.01462	0.01301	0.04187	0.01867	0.02471
0.07321	0.11904	0.0854	0.0158	0.0221	0.04051	0.02119	0.07757	0.01979	0.01395	0.01544	0.0153	0.03477	0.01634	0.01225	0.06278	0.01456	0.02419
0.1063	0.15072	0.05595	0.03286	0.01613	0.04838	0.02022	0.05263	0.01634	0.02852	0.02626	0.02549	0.036	0.02117	0.00849	0.03285	0.02842	0.03284
0.0943	0.14155	0.07667	0.01688	0.01756	0.04039	0.02131	0.07286	0.01705	0.01453	0.01592	0.01569	0.03449	0.02017	0.01018	0.05607	0.01565	0.02682
0.0638	0.11029	0.08867	0.01828	0.02143	0.04409	0.02326	0.0811	0.01926	0.01433	0.01749	0.01729	0.03762	0.01678	0.01427	0.06708	0.01458	0.02451
0.0528	0.09771	0.07782	0.0313	0.0154	0.05476	0.02447	0.07058	0.01857	0.02382	0.02671	0.02611	0.04308	0.01864	0.0116	0.05448	0.02289	0.03254
0.0411	0.08481	0.08111	0.05256	0.03307	0.07721	0.04137	0.08034	0.03523	0.04137	0.04718	0.04654	0.06455	0.03407	0.02477	0.06423	0.03782	0.0474
0.0929	0.13756	0.06995	0.01952	0.01079	0.03902	0.01691	0.06486	0.01198	0.01634	0.01608	0.01564	0.03085	0.01645	0.00832	0.0448	0.01483	0.02485
0.1112	0.156	0.06016	0.02267	0.00743	0.03824	0.01495	0.05682	0.00936	0.01918	0.01715	0.01647	0.02829	0.01687	0.00456	0.03498	0.01856	0.02487
0.1265	0.16732	0.0364	0.03905	0.02481	0.04569	0.01488	0.03445	0.01536	0.0333	0.02757	0.02662	0.03089	0.01862	0.0075	0.01828	0.03536	0.03061
0.1398	0.17907	0.03005	0.03868	0.02763	0.04139	0.01448	0.02785	0.01789	0.03417	0.02644	0.02553	0.04139	0.01488	0.01161	0.02807	0.03577	0.02708
0.1167	0.16124	0.06301	0.02203	0.017	0.03392	0.01745	0.05566	0.01816	0.02188	0.02019	0.01991	0.02642	0.17013	0.01332	0.03746	0.01903	0.07347
0.1068	0.15345	0.08237	0.0089	0.02656	0.02519	0.01405	0.0747	0.02394	0.0089	0.0089	0.0089	0.02253	0.06118	0.00895	0.06022	0.01316	0.04634
0.112	0.1574	0.06889	0.01657	0.01815	0.03146	0.01551	0.06146	0.01825	0.01649	0.01572	0.01554	0.02516	0.16409	0.01025	0.04417	0.01424	0.06484
0.1365	0.17737	0.0338	0.03484	0.02229	0.04022	0.01149	0.03392	0.01055	0.0271	0.02262	0.02163	0.04022	0.01836	0.0052	0.01746	0.03102	0.02539
0.1346	0.17399	0.03217	0.03031	0.01961	0.03547	0.00944	0.03211	0.00731	0.02268	0.01929	0.01848	0.03547	0.01803	0.00509	0.01685	0.01765	0.02276
0.1048	0.1492	0.05592	0.0341	0.01672	0.05035	0.0214	0.05449	0.01596	0.02824	0.0275	0.02677	0.03873	0.02386	0.00843	0.03185	0.02932	0.0348
0.1009	0.14532	0.05914	0.0303	0.0132	0.04733	0.02001	0.05676	0.01422	0.02505	0.02427	0.02359	0.0364	0.02159	0.00791	0.03457	0.02566	0.032
0.0966	0.14317	0.07222	0.0203	0.0139	0.0421	0.02119	0.06932	0.01491	0.0173	0.01809	0.01772	0.03498	0.0214	0.01063	0.05044	0.01795	0.02837
0.1045	0.14824	0.05394	0.03705	0.02029	0.05221	0.02236	0.05117	0.01917	0.0325	0.03	0.02922	0.03926	0.02441	0.01075	0.03062	0.03288	0.0364
0.1047	0.1491	0.06287	0.02573	0.01517	0.04165	0.01923	0.05693	0.01688	0.02455	0.02237	0.02192	0.03224	0.01905	0.01195	0.03821	0.02294	0.02917
0.117	0.16009	0.05252	0.03206	0.01884	0.04248	0.0191	0.0468	0.01937	0.03055	0.02615	0.02551	0.03042	0.01824	0.01424	0.02918	0.02883	0.02996
0.1259	0.16724	0.04317	0.03563	0.02215	0.04193	0.01728	0.03848	0.01925	0.03299	0.02689	0.02611	0.02836	0.01602	0.01361	0.02283	0.03224	0.02881
0.155	0.1929	0.0205	0.03528	0.02759	0.03602	0.01156	0.01993	0.01539	0.03003	0.02242	0.02155	0.02183	0.01358	0.00986	0.02104	0.03321	0.02249
0.1499	0.18739	0.02262	0.03319	0.02592	0.03384	0.01152	0.02179	0.01588	0.02772	0.02073	0.01993	0.03384	0.01195	0.01056	0.02538	0.0308	0.02022
0.1556	0.19236	0.01825	0.03149	0.02538	0.03176	0.01017	0.01776	0.01427	0.02598	0.01914	0.01836	0.03176	0.01227	0.00934	0.02309	0.02955	0.01885
0.0474	0.09139	0.0805	0.05263	0.03471	0.07725	0.04292	0.07969	0.03707	0.04305	0.04807	0.04746	0.06535	0.03755	0.02534	0.06404	0.04067	0.05006
0.0742	0.12099	0.08299	0.04301	0.03183	0.06691	0.04098	0.08411	0.03438	0.03699	0.04068	0.04026	0.05889	0.03825	0.02539	0.06892	0.03698	0.04745
0.0969	0.14612	0.07993	0.02769	0.02581	0.05091	0.03241	0.08007	0.02635	0.02493	0.02716	0.02694	0.04594	0.03185	0.01873	0.0651	0.0267	0.03728
0.1143	0.16277	0.07226	0.01533	0.01677	0.03723	0.02027	0.07063	0.01654	0.01291	0.01433	0.01408	0.03151	0.07306	0.00987	0.0539	0.01496	0.06175
0.1307	0.17728	0.0531	0.02705	0.01214	0.04253	0.01912	0.05252	0.01304	0.02341	0.02162	0.02088	0.03236	0.0233	0.00558	0.03079	0.02386	0.08435
0.1276	0.17411	0.0537	0.02807	0.01294	0.04382	0.01972	0.05282	0.01377	0.02421	0.02254	0.02179	0.03325	0.0232	0.00593	0.032	0.02463	0.08244
0.1328	0.17338	0.03061	0.04179	0.02907	0.04705	0.01404	0.03077	0.01423	0.03307	0.0281	0.02704	0.04705	0.02008	0.00549	0.01987	0.03791	0.03041
0.1345	0.17634	0.03445	0.04014	0.02607	0.04687	0.01508	0.03434	0.0142	0.03256	0.02762	0.02654	0.03133	0.02042	0.00563	0.01815	0.03601	0.03055
0.1408	0.18106	0.03076	0.03651	0.02495	0.04048	0.01201	0.03035	0.0142	0.02984	0.02381	0.02283	0.04048	0.01591	0.00801	0.02444	0.03283	0.02533
0.1456	0.18579	0.02801	0.03615	0.02513	0.03974	0.01131	0.0277	0.01322	0.02972	0.02324	0.02224	0.03974	0.01626	0.0066	0.02459	0.03286	0.02477
0.0666	0.11007	0.07161	0.05869	0.04058	0.07966	0.04301	0.07282	0.03896	0.04921	0.05283	0.0522	0.06675	0.04323	0.02701	0.05436	0.04898	0.05678
0.0748	0.11819	0.07734	0.0568	0.04099	0.07861	0.04661	0.07942	0.04139	0.04878	0.05252	0.05199	0.06803	0.04623	0.03034	0.0618	0.04856	0.05748
0.0908	0.13976	0.08426	0.02475	0.02696	0.04835	0.03102	0.08313	0.02628	0.02247	0.02467	0.02455	0.04426	0.02913	0.0193	0.0688	0.02438	0.03426
0.1032	0.15142	0.07625	0.01764	0.0179	0.04028	0.02217	0.07435	0.01751	0.01448	0.01647	0.01622	0.03437	0.0228	0.01299	0.05768	0.01654	0.0272
0.1268	0.17413	0.05733	0.02625	0.01298	0.04395	0.0214	0.05722	0.01459	0.02253	0.02196	0.02132	0.03474	0.02546	0.00717	0.03642	0.02356	0.08077
0.1285	0.17583	0.05693	0.02588	0.0129	0.04344	0.02128	0.05687	0.01447	0.0224	0.02174	0.02111	0.03444	0.02552	0.00715	0.03589	0.02336	0.08177
0.1377	0.18337	0.04686	0.03061	0.01514	0.04363	0.01849	0.04677	0.01304	0.02658	0.02364	0.0228	0.03241	0.19039	0.005	0.02329	0.02733	0.09082
0.1397	0.18046	0.03076	0.03825	0.02575	0.04348	0.01292	0.0308	0.01284	0.0309	0.02579	0.02479	0.04348	0.01901	0.00511	0.01811	0.03455	0.02827
0.1289	0.17034	0.03706	0.03732	0.02306	0.04438	0.01381	0.03678	0.01239	0.0296	0.02574	0.02477	0.03005	0.01908	0.00515	0.01737	0.03295	0.02896
0.1312	0.17127	0.03769	0.03364	0.02198	0.03776	0.01261	0.03614	0.01538	0.02739	0.0223	0.02147	0.03776	0.01448	0.01054	0.02563	0.02947	0.02353
0.1441	0.1842	0.02908	0.03487	0.02393	0.03845	0.01082	0.02871	0.01287	0.02837	0.02223	0.02125	0.03845	0.01562	0.00672	0.02097	0.03145	0.02375
0.0713	0.11828	0.08517	0.0406	0.03071	0.06467	0.0398	0.08581	0.03325	0.03478	0.03859	0.03821	0.05719	0.03633	0.02579	0.07074	0.03465	0.04508
0.1012	0.15027	0.07947	0.02101	0.02333	0.04425	0.0274	0.07857	0.02265	0.01882	0.02076	0.02061	0.03979	0.06532	0.01548	0.06342	0.02118	0.05551
0.1272	0.1729	0.0525	0.02727	0.01121	0.04151	0.01705	0.05154	0.01127	0.02263	0.02075	0.01996	0.0307	0.02101	0.00512	0.02947	0.02328	0.08291
0.1358	0.18059	0.04605	0.02918	0.01337	0.04002	0.01486	0.04522	0.01046	0.02444	0.02088	0.01996	0.02801	0.01939	0.00417	0.02289	0.02505	0.0904
0.1357	0.17906	0.03823	0.03884	0.02367	0.04791	0.01724	0.03799	0.01478	0.03257	0.02805	0.02701	0.03333	0.02262	0.00564	0.01795	0.0348	0.03224
0.1375	0.18041	0.03653	0.03869	0.02408	0.04669	0.01615	0.03618	0.01462	0.03247	0.02751	0.02647	0.03203	0.0214	0.00617	0.01811	0.0347	0.03113
0.1444	0.18313	0.02698	0.0334	0.02408	0.03576	0.01019	0.0265	0.0136	0.02706	0.02106	0.02019	0.03576	0.01397	0.00804	0.02998	0.03025	0.02182
0.147	0.18592	0.02631	0.03282	0.02353	0.03523	0.00982	0.02577	0.01305	0.02683	0.02061	0.01974	0.03523	0.01394	0.0074	0.02283	0.0298	0.02146
0.1385	0.18483	0.04707	0.03471	0.01996	0.04909	0.02318	0.04738	0.01767	0.03114	0.02835	0.0275	0.03762	0.18691	0.007	0.02554	0.03202	0.09148
0.0478	0.09208	0.07728	0.04705	0.02862	0.07079	0.03671	0.07537	0.03095	0.03778	0.04227	0.04172	0.05911	0.03182	0.02216	0.05795	0.03543	0.04536
0.0746	0.11859	0.06571	0.0654	0.04587	0.08546	0.04292	0.0674	0.0401	0.05364	0.05654	0.05556	0.06774	0.04567	0.02288	0.04984	0.05539	0.06054
0.0966	0.14572	0.07926	0.02521	0.02382	0.04871	0.03005	0.07877	0.02404	0.02237	0.0246	0.02438	0.04352	0.0294	0.01696	0.06353	0.02419	0.03495
0.1224	0.16905	0.06002	0.02158	0.00929	0.03861	0.01705	0.05859	0.01066	0.01771	0.01721	0.0166	0.02984	0.02045	0.00643	0.03797	0.01821	0.07722
0.1312	0.17655	0.04738	0.03026	0.01407	0.04206	0.01601	0.04671	0.01122	0.02503	0.02214	0.02124	0.02999	0.02052	0.0045	0.02421	0.02603	0.08766
0.1292	0.17221	0.04011	0.03858	0.02301	0.04781	0.0168	0.03983	0.01419	0.0315	0.0278	0.02679	0.03328	0.02169	0.00556	0.0188	0.03412	0.03195
0.1419	0.18011	0.02216	0.03706	0.02819	0.03948	0.00988	0.02259	0.01227	0.02881	0.02333	0.02241	0.03948	0.01675	0.00563	0.0321	0.03426	0.0246
0.1419	0.18125	0.02622	0.03816	0.02777	0.04128	0.01139	0.02631	0.01383	0.03053	0.02443	0.02343	0.04128	0.01662	0.00701	0.02756	0.03489	0.02574
0.1408	0.18076	0.03104	0.03437	0.02313	0.03819	0.01087	0.0305	0.01302	0.02784	0.02221	0.02128	0.03819	0.01523	0.00719	0.0241	0.03072	0.02379
0.1418	0.18617	0.04014	0.03533	0.02027	0.04523	0.01738	0.0398	0.01426	0.03075	0.0263	0.02533	0.03218	0.02274	0.00575	0.01873	0.0317	0.09621
0.0461	0.09027	0.07893	0.04908	0.03109	0.07341	0.03935	0.07701	0.03369	0.03999	0.04472	0.04417	0.06193	0.03396	0.02374	0.06074	0.03749	0.04721
0.0725	0.11957	0.08882	0.04089	0.03407	0.06457	0.0424	0.08987	0.03635	0.03635	0.03988	0.03963	0.05891	0.03864	0.02891	0.07558	0.0361	0.04619
0.1041	0.15317	0.07994	0.01892	0.02411	0.0417	0.02628	0.07876	0.02295	0.01731	0.01891	0.01883	0.0417	0.06448	0.01515	0.06367	0.02007	0.0606
0.1088	0.15628	0.06567	0.025	0.01356	0.04541	0.02235	0.06469	0.01522	0.02051	0.02142	0.02088	0.0367	0.02435	0.00978	0.04559	0.02173	0.03139
0.1187	0.16479	0.05583	0.02937	0.01305	0.04545	0.01945	0.05498	0.01348	0.0241	0.02317	0.02239	0.03428	0.0227	0.00653	0.0339	0.02514	0.031
0.1209	0.16613	0.05375	0.02863	0.01209	0.04303	0.01722	0.05324	0.01113	0.02274	0.02151	0.02071	0.03201	0.02184	0.00654	0.02976	0.02424	0.02888
0.1232	0.16884	0.05027	0.03541	0.01864	0.05014	0.02142	0.05023	0.01593	0.02953	0.02779	0.02689	0.0374	0.02575	0.00632	0.02791	0.03119	0.0348
0.135	0.17513	0.03113	0.03623	0.02408	0.04137	0.01152	0.03115	0.01099	0.02843	0.02412	0.02319	0.04137	0.01818	0.00408	0.01705	0.0325	0.02674
0.133	0.17352	0.03889	0.0311	0.01909	0.03562	0.01082	0.03715	0.01307	0.02491	0.01998	0.0191	0.02244	0.01411	0.00824	0.02346	0.0269	0.02175
0.1441	0.18731	0.0356	0.03601	0.02179	0.04362	0.01494	0.03534	0.01291	0.0306	0.02526	0.02423	0.02975	0.02088	0.00496	0.01632	0.03235	0.09981
0.0742	0.1188	0.07539	0.04762	0.03193	0.06947	0.03895	0.07652	0.03297	0.03974	0.04338	0.04288	0.05947	0.03806	0.02558	0.05763	0.03988	0.05562
0.0756	0.12065	0.07116	0.0532	0.0353	0.075	0.03985	0.07261	0.03431	0.04377	0.0471	0.04635	0.06154	0.04007	0.02251	0.05445	0.04468	0.05276
0.1024	0.15019	0.07572	0.0184	0.01805	0.04093	0.02247	0.07352	0.01803	0.01572	0.01744	0.01722	0.03545	0.02304	0.01281	0.05643	0.01738	0.02827
0.1045	0.15176	0.06719	0.02444	0.01292	0.04483	0.02129	0.06578	0.01435	0.01937	0.02043	0.01984	0.03567	0.02285	0.00991	0.0469	0.02056	0.03001
0.1236	0.16877	0.05235	0.02842	0.01204	0.04184	0.0164	0.05081	0.01143	0.02344	0.02136	0.02054	0.03036	0.01941	0.00532	0.02969	0.02397	0.02787
0.1279	0.17144	0.04355	0.03545	0.01952	0.04552	0.01637	0.04265	0.0136	0.02926	0.02577	0.02481	0.03185	0.02022	0.00629	0.02183	0.0309	0.03029
0.144	0.18359	0.02707	0.03758	0.02702	0.04073	0.01172	0.02698	0.0144	0.0307	0.02433	0.02336	0.04073	0.01616	0.00784	0.02745	0.03427	0.02551
0.14397	0.18365	0.02857	0.03541	0.02494	0.03845	0.01135	0.02809	0.0143	0.02915	0.02268	0.02173	0.03845	0.0148	0.00831	0.0272	0.03206	0.02366
0.13703	0.17778	0.03711	0.03265	0.02072	0.03708	0.01202	0.03546	0.01466	0.02727	0.02152	0.02064	0.02344	0.01391	0.00943	0.02442	0.0286	0.02281
0.13886	0.18403	0.0433	0.03442	0.01898	0.04607	0.01891	0.04295	0.01474	0.03018	0.02631	0.02537	0.03347	0.19328	0.00578	0.0212	0.03093	0.09313
0.07512	0.12038	0.07847	0.04877	0.03439	0.07179	0.04242	0.07989	0.03629	0.04172	0.04543	0.04495	0.06249	0.0409	0.02649	0.06312	0.04154	0.05165
0.07918	0.12618	0.07854	0.04186	0.02926	0.06524	0.03824	0.07954	0.03152	0.0355	0.03885	0.03837	0.05635	0.03676	0.02275	0.06324	0.03598	0.04633
0.1143	0.16198	0.07139	0.01425	0.01481	0.03507	0.01769	0.069	0.0148	0.01154	0.01271	0.01241	0.02894	0.01972	0.0093	0.05141	0.013	0.06849
0.11448	0.1584	0.05068	0.03603	0.01969	0.04991	0.02041	0.05112	0.01465	0.02857	0.0279	0.02711	0.03808	0.02607	0.00999	0.02487	0.03138	0.03474
0.11726	0.163	0.0549	0.03147	0.01487	0.04741	0.02032	0.05469	0.01406	0.02548	0.02476	0.02397	0.03606	0.02444	0.00766	0.03204	0.02713	0.03259
0.13349	0.17818	0.04645	0.03099	0.01543	0.04215	0.01624	0.04521	0.01287	0.02657	0.02313	0.02226	0.03007	0.01978	0.00654	0.02471	0.02686	0.08897
0.12601	0.16982	0.04521	0.03485	0.01858	0.04571	0.01673	0.04448	0.01313	0.02845	0.02557	0.02464	0.03238	0.02081	0.00583	0.02286	0.03024	0.03059
0.13421	0.17449	0.03336	0.03733	0.02529	0.04157	0.01273	0.033	0.01486	0.02982	0.02451	0.02352	0.04157	0.01643	0.00913	0.02413	0.03333	0.02612
0.1363	0.17763	0.03851	0.03238	0.0196	0.03783	0.012	0.03726	0.01335	0.02656	0.02156	0.02066	0.02455	0.01542	0.00847	0.02269	0.02817	0.0238
0.12563	0.1663	0.04083	0.03403	0.02126	0.03907	0.0128	0.03963	0.01424	0.02659	0.02262	0.02172	0.03907	0.01625	0.01009	0.02359	0.0296	0.0246
0.07486	0.1183	0.06394	0.05413	0.03572	0.07286	0.03574	0.06486	0.03183	0.04443	0.0469	0.0462	0.05904	0.03784	0.02176	0.04362	0.04571	0.05173
0.07896	0.12467	0.07258	0.0491	0.03256	0.0714	0.03909	0.07392	0.03298	0.04091	0.04412	0.04345	0.05962	0.03902	0.02202	0.05628	0.04168	0.0507
0.09042	0.13814	0.0734	0.03314	0.02139	0.05565	0.03031	0.07342	0.02341	0.02741	0.02993	0.02943	0.04683	0.03045	0.01686	0.05595	0.02864	0.03891
0.12167	0.16457	0.04449	0.03595	0.0199	0.04562	0.01545	0.04391	0.0126	0.02846	0.02565	0.02469	0.03162	0.01998	0.00604	0.02148	0.03109	0.0299
0.11874	0.15994	0.03956	0.03636	0.02205	0.04461	0.01403	0.03974	0.01058	0.02755	0.02524	0.02437	0.03149	0.02109	0.00644	0.01312	0.0319	0.02949
0.11406	0.15914	0.05688	0.02865	0.01251	0.04386	0.01798	0.05647	0.01155	0.02215	0.02166	0.0209	0.03312	0.02247	0.00888	0.0327	0.02403	0.02929
0.11861	0.16265	0.04796	0.03568	0.01866	0.04837	0.0185	0.04745	0.01382	0.02874	0.02685	0.02595	0.03525	0.02271	0.00577	0.02438	0.03086	0.03273
0.13174	0.17304	0.03777	0.03607	0.02261	0.04186	0.01329	0.03675	0.01459	0.02939	0.02437	0.0234	0.02736	0.01629	0.00879	0.02229	0.03169	0.02658
0.13703	0.17852	0.0369	0.03391	0.02065	0.03982	0.01234	0.03594	0.01303	0.02801	0.02302	0.02209	0.02635	0.01617	0.00729	0.02077	0.02977	0.02554
0.13582	0.18209	0.04812	0.03228	0.01715	0.04652	0.02111	0.0479	0.01564	0.02862	0.02586	0.02502	0.0351	0.18632	0.00635	0.02627	0.0292	0.08932
0.07819	0.1216	0.06918	0.05593	0.03879	0.0757	0.04085	0.0709	0.03638	0.04693	0.05004	0.04943	0.06351	0.04259	0.02661	0.05063	0.04774	0.05516
0.08198	0.12781	0.06935	0.04758	0.0304	0.06904	0.03609	0.07048	0.02999	0.03904	0.0418	0.04107	0.05646	0.03677	0.01969	0.05185	0.04034	0.04856
0.09838	0.14687	0.07249	0.02807	0.01928	0.05097	0.02829	0.07215	0.02114	0.02366	0.02571	0.02526	0.04312	0.02862	0.01388	0.05516	0.02509	0.03588
0.12157	0.16929	0.06037	0.02778	0.01553	0.04696	0.02426	0.06067	0.01738	0.024	0.02409	0.0235	0.03814	0.02797	0.00924	0.0405	0.02377	0.07729
0.12806	0.17256	0.04793	0.03048	0.01417	0.04202	0.01554	0.04692	0.01109	0.02486	0.0221	0.0212	0.02975	0.01952	0.00499	0.0251	0.026	0.02776
0.12869	0.17295	0.0457	0.03282	0.01651	0.04446	0.01673	0.04527	0.01189	0.02686	0.02412	0.02322	0.03201	0.02173	0.00448	0.02169	0.02854	0.02999
0.12597	0.1685	0.04311	0.03384	0.01842	0.04247	0.01398	0.04194	0.01202	0.02717	0.02369	0.02275	0.029	0.01765	0.00592	0.02092	0.02912	0.02754
0.13789	0.17854	0.03447	0.03435	0.02213	0.03911	0.01201	0.03349	0.01387	0.02844	0.02298	0.02208	0.03911	0.01529	0.00825	0.02238	0.03042	0.02477
0.14227	0.18453	0.03538	0.035	0.02152	0.04117	0.01324	0.03461	0.01337	0.02962	0.02394	0.02295	0.02727	0.01752	0.00683	0.01963	0.03111	0.09939
0.1274	0.17215	0.04919	0.02988	0.0135	0.04255	0.01641	0.04853	0.01114	0.02437	0.02223	0.02139	0.04255	0.02112	0.00506	0.02522	0.02561	0.02874
0.08166	0.12513	0.06288	0.06521	0.04688	0.08357	0.04194	0.06463	0.0398	0.05427	0.05637	0.05547	0.0669	0.04654	0.02368	0.04585	0.05654	0.06075
0.07917	0.12306	0.06494	0.0616	0.04303	0.08099	0.04116	0.06666	0.03784	0.05099	0.0536	0.05276	0.0653	0.04427	0.0234	0.04778	0.05277	0.05829
0.08789	0.13581	0.0756	0.03272	0.022	0.05576	0.03114	0.07553	0.02418	0.02718	0.02993	0.02946	0.04745	0.03055	0.01756	0.05846	0.0283	0.03889
0.12288	0.16948	0.05545	0.02981	0.01474	0.04669	0.02174	0.05514	0.01538	0.02522	0.02445	0.02374	0.03637	0.02562	0.00754	0.03384	0.02636	0.07967
0.13237	0.17869	0.05358	0.02434	0.00967	0.03872	0.01651	0.05239	0.0106	0.02084	0.01886	0.01813	0.02873	0.02014	0.00507	0.03158	0.01758	0.08892
0.1293	0.17326	0.04634	0.03064	0.01459	0.04131	0.01467	0.04543	0.01054	0.02484	0.0219	0.021	0.02908	0.01923	0.00454	0.02254	0.02618	0.0272
0.1338	0.17512	0.03477	0.03718	0.02354	0.04353	0.01332	0.03449	0.01244	0.02986	0.02533	0.02434	0.02912	0.01867	0.005	0.01767	0.03307	0.02824
0.14533	0.18639	0.0308	0.03589	0.02385	0.04036	0.01223	0.03022	0.0136	0.03019	0.02384	0.02286	0.02603	0.01676	0.00701	0.02216	0.0324	0.0257
0.1479	0.18881	0.032	0.03265	0.02135	0.0365	0.01124	0.0311	0.01358	0.02774	0.02136	0.02046	0.0231	0.01464	0.008	0.02423	0.02912	0.02271
0.13652	0.18338	0.05122	0.02895	0.01516	0.04457	0.02169	0.05125	0.01557	0.02606	0.02409	0.02338	0.03488	0.18309	0.00669	0.02955	0.02661	0.08522
0.07393	0.1192	0.07982	0.04745	0.03362	0.07053	0.04202	0.08114	0.03576	0.0405	0.04428	0.04383	0.0616	0.04014	0.02689	0.06446	0.04029	0.05037
0.10401	0.15246	0.07742	0.01537	0.01988	0.03872	0.02188	0.0749	0.01904	0.01325	0.01498	0.01482	0.03379	0.06707	0.01166	0.05918	0.01562	0.05681
0.12326	0.16764	0.05115	0.02864	0.01224	0.04091	0.01498	0.05006	0.0101	0.0227	0.02078	0.01994	0.02947	0.01948	0.00596	0.02758	0.02404	0.02696
0.13081	0.17703	0.05339	0.0253	0.01025	0.03962	0.01674	0.05214	0.0111	0.02161	0.01954	0.01878	0.02923	0.02014	0.00505	0.03133	0.02161	0.08759
0.12832	0.17155	0.04637	0.02854	0.01274	0.03874	0.01308	0.04531	0.00859	0.02266	0.01992	0.01908	0.02739	0.01817	0.00388	0.02108	0.02411	0.02534
0.12529	0.16899	0.0449	0.03488	0.01858	0.04588	0.01667	0.0445	0.01258	0.02809	0.02541	0.02447	0.03266	0.02158	0.00539	0.02188	0.03029	0.0307
0.12684	0.1674	0.03203	0.04492	0.03168	0.05058	0.01572	0.0322	0.01631	0.03557	0.03109	0.03004	0.03394	0.02169	0.00683	0.02015	0.04076	0.03331
0.12701	0.16763	0.03488	0.03931	0.02602	0.04494	0.01354	0.03457	0.01421	0.03103	0.0268	0.02583	0.04494	0.01823	0.00747	0.02028	0.03499	0.02909
0.13237	0.17497	0.03978	0.03622	0.0214	0.04401	0.0147	0.03918	0.01354	0.02959	0.02534	0.02433	0.02977	0.01884	0.00698	0.02031	0.03178	0.02874
0.12396	0.17229	0.0625	0.0261	0.01726	0.04604	0.02596	0.06302	0.01898	0.02358	0.02383	0.02337	0.03877	0.08181	0.01039	0.04405	0.02499	0.07099
0.07574	0.12088	0.07807	0.04583	0.03176	0.06829	0.03982	0.07936	0.03364	0.03887	0.04246	0.04201	0.05937	0.03858	0.02617	0.06149	0.03888	0.04885
0.08383	0.13223	0.08027	0.03154	0.02436	0.05554	0.03289	0.07999	0.02623	0.02685	0.02988	0.02953	0.04868	0.03104	0.01938	0.06439	0.02786	0.03874
0.1051	0.1538	0.07228	0.02805	0.02115	0.05036	0.02957	0.07271	0.02275	0.02453	0.02635	0.02599	0.04371	0.03091	0.01547	0.05564	0.02621	0.03696
0.12162	0.16569	0.0493	0.03105	0.01431	0.04336	0.01597	0.0488	0.01058	0.02438	0.02247	0.02159	0.03137	0.02102	0.00545	0.02406	0.02641	0.02872
0.13187	0.17763	0.0497	0.02919	0.01314	0.04273	0.01761	0.04926	0.01201	0.02454	0.02216	0.02131	0.03136	0.02219	0.00486	0.02679	0.02537	0.0866
0.13199	0.17531	0.03985	0.03823	0.02273	0.04742	0.01687	0.03942	0.01448	0.03169	0.02749	0.02645	0.03282	0.02155	0.00596	0.01926	0.03389	0.03159
0.13778	0.17748	0.03041	0.03686	0.02583	0.04034	0.01197	0.03024	0.01453	0.02943	0.02382	0.02285	0.04034	0.01599	0.00878	0.02326	0.03319	0.02517
0.14216	0.18105	0.02703	0.03462	0.02496	0.03721	0.01054	0.02659	0.0138	0.028	0.02192	0.02103	0.03721	0.01423	0.00799	0.02923	0.03141	0.02278
0.14061	0.18055	0.03369	0.03236	0.02153	0.03585	0.01119	0.03257	0.01411	0.02657	0.02091	0.02005	0.03585	0.0142	0.00901	0.02595	0.02862	0.02205
0.129	0.17568	0.05285	0.03046	0.01578	0.04662	0.02212	0.05241	0.01615	0.02697	0.02522	0.02448	0.03616	0.02614	0.00688	0.03128	0.02752	0.08369
0.08575	0.13111	0.06847	0.04045	0.0245	0.06063	0.0309	0.06892	0.02467	0.03286	0.0354	0.03483	0.0502	0.03204	0.01896	0.04797	0.03415	0.04268
0.07955	0.12696	0.07852	0.03608	0.02477	0.05955	0.03387	0.07852	0.02713	0.03008	0.03336	0.03293	0.05125	0.03222	0.02032	0.06192	0.03066	0.04134
0.09379	0.1415	0.07562	0.02511	0.01803	0.04769	0.02588	0.0746	0.01928	0.02053	0.02295	0.02259	0.04066	0.02601	0.01535	0.05701	0.02194	0.03271
0.11877	0.16328	0.05161	0.03122	0.01447	0.04466	0.01728	0.05139	0.01128	0.02433	0.02297	0.02211	0.03287	0.02241	0.00738	0.02693	0.02656	0.02981
0.12318	0.16984	0.05649	0.02731	0.01251	0.04421	0.02025	0.05573	0.01403	0.02318	0.02233	0.02164	0.03422	0.02361	0.00637	0.03493	0.0239	0.0791
0.13174	0.17353	0.03557	0.03951	0.02525	0.04651	0.01488	0.03542	0.0138	0.03172	0.02717	0.02611	0.03119	0.02011	0.00576	0.01813	0.03524	0.03027
0.13684	0.17882	0.03433	0.03935	0.02536	0.04697	0.01564	0.03458	0.01341	0.03215	0.02801	0.02703	0.03279	0.02258	0.004	0.01484	0.03553	0.03184
0.14212	0.18124	0.02467	0.04163	0.03165	0.0442	0.01276	0.02476	0.01607	0.03347	0.02655	0.02548	0.0442	0.01737	0.00873	0.02191	0.03854	0.02742
0.14031	0.18008	0.03148	0.03483	0.0241	0.03799	0.01194	0.03059	0.01519	0.02872	0.02243	0.02152	0.03799	0.01412	0.00957	0.02718	0.03121	0.02322
0.14587	0.19052	0.03964	0.03419	0.01946	0.04419	0.01733	0.03951	0.01367	0.03012	0.02562	0.02468	0.0318	0.19913	0.00517	0.01673	0.02419	0.09852
0.081	0.12605	0.06893	0.05483	0.03709	0.07623	0.04072	0.07037	0.03562	0.04595	0.04886	0.04811	0.06287	0.04198	0.02229	0.05247	0.04694	0.05489
0.09012	0.1389	0.0783	0.03427	0.02669	0.05792	0.03565	0.07897	0.02887	0.03008	0.03272	0.03235	0.05112	0.03461	0.01964	0.06373	0.03119	0.04201
0.1097	0.15684	0.06443	0.02774	0.01505	0.04744	0.02364	0.06431	0.01664	0.02267	0.02363	0.02306	0.03852	0.02656	0.01183	0.04387	0.0243	0.0333
0.12581	0.1693	0.04424	0.03507	0.01906	0.04607	0.01674	0.04454	0.01184	0.02777	0.02529	0.02436	0.03311	0.02315	0.0055	0.01829	0.0307	0.03098
0.1272	0.17053	0.04401	0.03363	0.01775	0.04414	0.01557	0.04401	0.01099	0.0266	0.02401	0.0231	0.03148	0.02172	0.00514	0.01885	0.02924	0.02948
0.12532	0.1693	0.04435	0.03763	0.02117	0.04891	0.01839	0.04411	0.01463	0.03076	0.02788	0.02688	0.03479	0.02295	0.00609	0.02258	0.03302	0.03299
0.12583	0.16995	0.04453	0.03817	0.02179	0.04971	0.01919	0.0442	0.01551	0.03158	0.02872	0.02774	0.03569	0.02357	0.0067	0.02301	0.03365	0.03391
0.13201	0.17423	0.04046	0.03452	0.02018	0.04163	0.01359	0.03939	0.01351	0.02824	0.02378	0.02282	0.02777	0.01705	0.00787	0.02164	0.03003	0.02679
0.13459	0.17918	0.04475	0.03263	0.01695	0.04317	0.01636	0.04378	0.0131	0.02774	0.02393	0.02299	0.03026	0.01998	0.00634	0.02333	0.02842	0.09049
0.11042	0.15927	0.07219	0.02917	0.02367	0.05074	0.03169	0.07319	0.0252	0.02641	0.02799	0.02768	0.04505	0.03368	0.01756	0.05594	0.02825	0.06585
0.073	0.11797	0.07779	0.05144	0.036	0.07455	0.04351	0.07913	0.03755	0.04378	0.04768	0.04715	0.06443	0.0419	0.02655	0.06251	0.04345	0.05338
0.08668	0.13524	0.07845	0.0331	0.02491	0.05699	0.03378	0.07859	0.02701	0.02843	0.03127	0.03088	0.04973	0.03245	0.01889	0.06327	0.0294	0.04037
0.11184	0.15939	0.06762	0.02103	0.01301	0.04134	0.0205	0.06653	0.01392	0.01692	0.01797	0.01749	0.0336	0.02296	0.01022	0.04738	0.01834	0.02826
0.12914	0.17428	0.04955	0.02946	0.01319	0.04223	0.01647	0.04897	0.01121	0.02412	0.02188	0.02103	0.03066	0.02108	0.00519	0.02658	0.02526	0.08542
0.12918	0.17532	0.05247	0.02754	0.01184	0.04215	0.01792	0.05162	0.01217	0.02334	0.02136	0.02056	0.0313	0.02172	0.00514	0.03008	0.02381	0.02882
0.12413	0.16925	0.04918	0.03385	0.01707	0.04735	0.01914	0.04857	0.01417	0.02813	0.02594	0.02504	0.03465	0.02304	0.00541	0.02642	0.02947	0.03231
0.12808	0.16985	0.03996	0.03806	0.02381	0.04489	0.01514	0.03898	0.016	0.03107	0.02654	0.02555	0.03002	0.01798	0.01016	0.02316	0.03346	0.02913
0.1355	0.17623	0.03699	0.0331	0.02078	0.03785	0.01176	0.03565	0.0139	0.02717	0.02188	0.02099	0.02429	0.01457	0.00862	0.02331	0.02895	0.02362
0.13764	0.1822	0.04289	0.03317	0.01769	0.04352	0.01659	0.04202	0.01338	0.02878	0.02448	0.02353	0.03067	0.02085	0.00579	0.02102	0.0293	0.09272
0.11368	0.16159	0.06387	0.03631	0.02428	0.05669	0.03249	0.06504	0.02559	0.03223	0.03293	0.03235	0.04779	0.03569	0.01511	0.04622	0.0338	0.04282
0.07527	0.11919	0.06747	0.06019	0.04171	0.08026	0.04168	0.06905	0.038	0.05001	0.05319	0.05245	0.06579	0.04368	0.02482	0.05019	0.05096	0.05772
0.07288	0.11885	0.08204	0.04392	0.03159	0.06737	0.0405	0.0831	0.03406	0.03744	0.04122	0.0408	0.05907	0.03799	0.0262	0.06693	0.03728	0.0476
0.10438	0.15179	0.0727	0.01942	0.01472	0.04054	0.02089	0.07097	0.01517	0.01526	0.01705	0.01668	0.03369	0.02246	0.0128	0.05265	0.01701	0.02718
0.12592	0.17056	0.04902	0.03078	0.01428	0.04303	0.0163	0.04799	0.01165	0.02518	0.02276	0.02188	0.03088	0.02012	0.00506	0.02603	0.02629	0.0287
0.10008	0.14594	0.0698	0.02114	0.01173	0.04013	0.01814	0.06678	0.01234	0.0159	0.01719	0.01671	0.03173	0.01941	0.01104	0.0476	0.01691	0.0257
0.11017	0.15557	0.05429	0.03881	0.02157	0.05528	0.02451	0.05443	0.01897	0.03186	0.03148	0.03065	0.04247	0.02827	0.00974	0.03256	0.0339	0.03876
0.12413	0.16546	0.03778	0.03886	0.02444	0.04604	0.0144	0.03747	0.01338	0.03063	0.02713	0.02617	0.03134	0.01941	0.00621	0.01813	0.03431	0.03019
0.13137	0.17219	0.0361	0.03726	0.02425	0.04249	0.01332	0.03547	0.01488	0.02998	0.02508	0.0241	0.04249	0.0168	0.00911	0.02271	0.03298	0.02708
0.14726	0.18839	0.03086	0.03556	0.02388	0.03953	0.01249	0.0301	0.01464	0.03036	0.02347	0.02248	0.02502	0.01585	0.00846	0.02403	0.03215	0.11701
0.12923	0.17657	0.05477	0.03003	0.01642	0.0474	0.0239	0.05491	0.01744	0.02676	0.02554	0.02485	0.03757	0.17772	0.00766	0.03431	0.02762	0.0836
0.07358	0.11721	0.0769	0.05353	0.03787	0.07533	0.04416	0.07857	0.03875	0.04581	0.04961	0.04914	0.06557	0.04334	0.02955	0.06029	0.04481	0.05476
0.08715	0.13548	0.08105	0.03316	0.02669	0.05615	0.03455	0.0813	0.0284	0.02905	0.0318	0.0315	0.04994	0.03369	0.02208	0.0661	0.03022	0.04058
0.10848	0.15631	0.0731	0.01656	0.01585	0.03839	0.02013	0.07101	0.01585	0.01348	0.0151	0.01481	0.03235	0.02161	0.01122	0.05343	0.01527	0.02604
0.12986	0.17544	0.05149	0.02734	0.01144	0.04076	0.01631	0.0507	0.01089	0.02257	0.02054	0.01973	0.02983	0.0207	0.00542	0.02875	0.02332	0.02748
0.12727	0.17261	0.05085	0.02935	0.01303	0.04303	0.01737	0.05022	0.01184	0.02427	0.02234	0.02153	0.03182	0.02175	0.00508	0.02759	0.02526	0.08378
0.13258	0.17317	0.03087	0.04118	0.0283	0.04701	0.01411	0.03108	0.01357	0.03267	0.02818	0.02718	0.04701	0.02088	0.00416	0.01785	0.03734	0.03095
0.14067	0.18076	0.03025	0.03515	0.02363	0.03929	0.01089	0.02989	0.01223	0.02834	0.02289	0.02194	0.03929	0.0161	0.00578	0.01991	0.03154	0.02478
0.14506	0.18399	0.02546	0.03562	0.02606	0.03818	0.01064	0.02541	0.01369	0.02886	0.02265	0.02173	0.03818	0.01517	0.00765	0.0219	0.03254	0.02361
0.1436	0.18394	0.03205	0.03348	0.02226	0.03712	0.0113	0.03102	0.01403	0.02809	0.02186	0.02096	0.03712	0.0142	0.00829	0.02487	0.02988	0.02301
0.13232	0.17885	0.05117	0.03335	0.01892	0.04913	0.02387	0.05156	0.01788	0.02961	0.02784	0.0271	0.03867	0.18379	0.00847	0.02899	0.0307	0.08926
0.09522	0.14291	0.0793	0.01827	0.01926	0.04167	0.02304	0.07653	0.01888	0.01525	0.01751	0.01731	0.03643	0.02247	0.01399	0.06008	0.017	0.02797
0.11819	0.16661	0.06772	0.02196	0.01773	0.04298	0.02501	0.06713	0.01871	0.01991	0.02085	0.02056	0.0373	0.16558	0.01163	0.04922	0.02154	0.06492
0.12892	0.17746	0.06594	0.02494	0.02009	0.04422	0.02718	0.06788	0.02108	0.02308	0.02365	0.02335	0.03894	0.17156	0.01503	0.04869	0.02524	0.0692
0.11043	0.15728	0.06248	0.04156	0.02738	0.06103	0.03329	0.06425	0.02708	0.0363	0.03704	0.0364	0.05091	0.03744	0.01714	0.04485	0.03804	0.04607
0.13445	0.17373	0.02508	0.04585	0.03516	0.04913	0.01404	0.02533	0.01657	0.03585	0.02983	0.02873	0.04913	0.02041	0.00739	0.02035	0.02794	0.03115
0.1244	0.17306	0.06742	0.02148	0.01833	0.042	0.02509	0.06787	0.01908	0.0194	0.02047	0.0202	0.03681	0.16854	0.01272	0.04944	0.02163	0.06561
0.13387	0.17799	0.03996	0.04295	0.02724	0.05337	0.0209	0.04026	0.01815	0.03629	0.03228	0.03118	0.03793	0.02644	0.00725	0.02069	0.03885	0.03683
0.07778	0.12611	0.08158	0.03653	0.02763	0.06126	0.03696	0.08155	0.03011	0.03133	0.03474	0.03434	0.05377	0.03399	0.02064	0.06683	0.03177	0.04275
0.09723	0.13982	0.04106	0.05855	0.04102	0.0683	0.0239	0.04144	0.02451	0.04438	0.04139	0.03999	0.04558	0.02937	0.00898	0.02399	0.0518	0.04385
0.09706	0.13933	0.04215	0.05189	0.0351	0.06016	0.02024	0.04167	0.02099	0.03904	0.03594	0.03466	0.03923	0.02346	0.01141	0.02491	0.04545	0.03783
0.10935	0.15469	0.05945	0.03006	0.01465	0.04744	0.02143	0.05842	0.01549	0.02468	0.02504	0.02445	0.03787	0.02432	0.01047	0.03659	0.02579	0.03341
0.11039	0.15816	0.06573	0.02888	0.01777	0.04963	0.02653	0.06558	0.01982	0.02476	0.02587	0.02538	0.04144	0.02892	0.01254	0.04685	0.02616	0.03605
0.10568	0.15397	0.0719	0.0286	0.02083	0.05022	0.02914	0.07278	0.0225	0.02481	0.02659	0.02621	0.04344	0.03111	0.01652	0.05467	0.02653	0.03693
0.11527	0.15882	0.04568	0.04775	0.0313	0.06055	0.02496	0.04696	0.0211	0.03871	0.03703	0.03602	0.04509	0.03219	0.01083	0.02215	0.04287	0.04262
0.12812	0.16987	0.03763	0.03877	0.02432	0.046	0.0146	0.03761	0.01334	0.03068	0.02682	0.0258	0.03102	0.02011	0.00634	0.0182	0.03436	0.03001
0.1333	0.1731	0.03031	0.03764	0.02589	0.042	0.01163	0.03029	0.01254	0.02952	0.02484	0.0239	0.042	0.01735	0.00574	0.02163	0.02257	0.0268
0.13837	0.17841	0.02954	0.03849	0.02668	0.04283	0.01229	0.02942	0.01371	0.03114	0.02576	0.0248	0.04283	0.01763	0.00642	0.02289	0.03483	0.02761
0.14551	0.19192	0.04742	0.03135	0.0183	0.04514	0.02227	0.04879	0.01636	0.02865	0.02582	0.02509	0.03551	0.18955	0.00896	0.02349	0.02986	0.09106
0.12554	0.16913	0.04143	0.04783	0.03198	0.0595	0.02431	0.04225	0.02154	0.04024	0.03717	0.03613	0.0439	0.03123	0.00859	0.02056	0.04365	0.04232
0.14299	0.1819	0.02423	0.0405	0.03058	0.04318	0.01219	0.02416	0.0154	0.03301	0.02645	0.02548	0.04318	0.01715	0.00791	0.02087	0.03748	0.02742
0.10965	0.15689	0.06407	0.02848	0.01623	0.04873	0.02509	0.06322	0.01856	0.02438	0.02515	0.02463	0.04011	0.02707	0.01096	0.04396	0.0254	0.03496
0.11491	0.16065	0.05405	0.0379	0.0214	0.05462	0.02526	0.05409	0.01961	0.03201	0.03135	0.03055	0.04255	0.02913	0.00982	0.03247	0.03362	0.03904
0.12469	0.16623	0.03698	0.04195	0.02729	0.04933	0.01611	0.03671	0.0156	0.03358	0.02964	0.02861	0.03362	0.02093	0.0072	0.01937	0.03736	0.03258
0.1423	0.18201	0.02869	0.03385	0.02308	0.03757	0.00994	0.02843	0.01107	0.02685	0.02141	0.02047	0.03757	0.01598	0.00495	0.02304	0.03048	0.0233
0.13753	0.18221	0.04332	0.03271	0.01706	0.04363	0.01677	0.04298	0.01245	0.02778	0.02417	0.02324	0.0312	0.02195	0.00455	0.02047	0.02885	0.09245
0.14214	0.18851	0.04677	0.03893	0.02499	0.05356	0.0268	0.04829	0.02109	0.03481	0.03262	0.03179	0.04237	0.18959	0.00979	0.02574	0.03672	0.09481
0.13932	0.18254	0.03564	0.04477	0.03023	0.05349	0.02034	0.03565	0.01939	0.03899	0.03356	0.03248	0.0379	0.02676	0.00784	0.01958	0.04128	0.09818
0.13892	0.18102	0.03352	0.0421	0.02822	0.04909	0.01664	0.03356	0.01611	0.03512	0.03003	0.02897	0.03371	0.02269	0.00674	0.019	0.03824	0.03308
0.13693	0.17983	0.03533	0.04531	0.03064	0.05407	0.02002	0.03588	0.01829	0.03811	0.03359	0.0325	0.03834	0.02715	0.00602	0.01755	0.04152	0.03755
0.10487	0.15073	0.0601	0.03843	0.02239	0.05666	0.02747	0.061	0.02098	0.03147	0.03227	0.03155	0.04533	0.03126	0.01419	0.0386	0.03366	0.04038
0.1072	0.15172	0.05584	0.03486	0.01787	0.05056	0.0212	0.05549	0.01566	0.02792	0.02793	0.02721	0.03907	0.02502	0.0104	0.03245	0.02979	0.03505
0.11902	0.16339	0.04753	0.03811	0.02093	0.05048	0.01947	0.04681	0.01556	0.03109	0.0286	0.0276	0.0359	0.02282	0.00628	0.02541	0.03316	0.03382
0.11289	0.15623	0.05244	0.03233	0.01706	0.04389	0.01648	0.05205	0.01199	0.02447	0.02308	0.02225	0.03156	0.02168	0.01068	0.02754	0.02737	0.02857
0.13177	0.16794	0.01827	0.03179	0.02623	0.03496	0.01072	0.01903	0.00955	0.02296	0.02051	0.01994	0.02429	0.02196	0.01002	0.01461	0.03031	0.02361
0.13308	0.16899	0.01949	0.02944	0.02439	0.03264	0.01126	0.02013	0.00974	0.021	0.01876	0.01822	0.02282	0.02218	0.01096	0.01647	0.02816	0.02213
0.12192	0.15786	0.01679	0.03755	0.03148	0.04057	0.01124	0.01748	0.01174	0.02771	0.02556	0.02501	0.02877	0.0226	0.00943	0.01063	0.03571	0.02803
0.12224	0.15678	0.01369	0.03802	0.03268	0.04049	0.01007	0.01367	0.01225	0.02905	0.02726	0.02684	0.04049	0.02274	0.00832	0.00807	0.03645	0.02925
0.13558	0.16728	0.00801	0.02823	0.02483	0.0294	0.0068	0.00806	0.00784	0.02152	0.01976	0.01947	0.0294	0.01933	0.00641	0.01054	0.02739	0.02121
0.08466	0.12632	0.06042	0.06139	0.04599	0.07672	0.03971	0.06242	0.03748	0.05113	0.05279	0.05211	0.06285	0.04502	0.02838	0.03946	0.05423	0.05706
0.11477	0.16201	0.06101	0.02808	0.01424	0.04711	0.02278	0.06032	0.01606	0.02352	0.02366	0.02302	0.03735	0.02552	0.00868	0.04039	0.02466	0.03304
0.10124	0.14545	0.05719	0.03413	0.0167	0.05018	0.02079	0.05588	0.01553	0.02721	0.02748	0.02679	0.03879	0.02308	0.00978	0.03354	0.02865	0.03439
0.11555	0.16032	0.04921	0.04616	0.02916	0.06115	0.02716	0.04996	0.02275	0.03863	0.03732	0.03636	0.04655	0.03263	0.01057	0.02836	0.04141	0.04373
0.11691	0.16184	0.04884	0.04768	0.03075	0.06276	0.02828	0.04959	0.02402	0.04025	0.03867	0.03766	0.04768	0.03388	0.01061	0.02887	0.04304	0.04502
0.11772	0.16335	0.05118	0.04317	0.02643	0.05922	0.02736	0.05195	0.02209	0.03653	0.03535	0.03442	0.04553	0.03236	0.01009	0.03055	0.03884	0.04254
0.12065	0.16679	0.05257	0.03782	0.0216	0.05426	0.02533	0.05288	0.01948	0.03222	0.0311	0.03026	0.04197	0.02978	0.00885	0.03132	0.03391	0.0389
0.12386	0.16948	0.04994	0.0353	0.01858	0.0499	0.02124	0.04998	0.01561	0.02934	0.02755	0.02664	0.03719	0.02586	0.00631	0.02722	0.03111	0.03459
0.12219	0.16727	0.04861	0.03672	0.01969	0.05045	0.02056	0.04853	0.0156	0.03028	0.02824	0.0273	0.03701	0.02499	0.00593	0.02586	0.03222	0.0346
0.12152	0.16542	0.04514	0.03867	0.02194	0.05058	0.01911	0.04548	0.01464	0.03094	0.02864	0.02765	0.03643	0.0248	0.00614	0.02105	0.03395	0.03422
0.13265	0.17272	0.02908	0.04298	0.03089	0.04748	0.01395	0.02927	0.01512	0.03392	0.02868	0.02762	0.04748	0.01977	0.00657	0.02292	0.03922	0.03052
0.13988	0.17788	0.02142	0.03684	0.02808	0.03957	0.00951	0.02206	0.01102	0.02837	0.02377	0.02292	0.03957	0.01813	0.00441	0.01717	0.03416	0.02542
0.11118	0.15616	0.05583	0.04082	0.02504	0.05782	0.02826	0.05618	0.02295	0.0349	0.035	0.03434	0.04686	0.03262	0.01458	0.03404	0.03656	0.04276
0.11601	0.16122	0.05099	0.04754	0.03082	0.06353	0.02983	0.05182	0.02527	0.04056	0.03939	0.03844	0.04916	0.03529	0.01194	0.03126	0.04305	0.0462
0.13838	0.17862	0.02953	0.03954	0.0277	0.04373	0.01276	0.02938	0.01454	0.03191	0.02597	0.02493	0.04373	0.01749	0.00723	0.02369	0.03587	0.02765
0.14467	0.18348	0.02497	0.03712	0.02769	0.03939	0.01153	0.02486	0.01502	0.03036	0.02367	0.02274	0.03939	0.01497	0.00883	0.02252	0.03411	0.02429
0.1311	0.17389	0.03858	0.03954	0.02436	0.04798	0.01659	0.03818	0.01493	0.03246	0.02811	0.02705	0.03284	0.02119	0.0066	0.01934	0.03515	0.03175
0.13138	0.17806	0.05111	0.03462	0.02008	0.05065	0.02489	0.05119	0.01922	0.0311	0.02917	0.02839	0.0397	0.18189	0.00841	0.03041	0.0319	0.08613
0.13562	0.18197	0.04965	0.03003	0.01528	0.04463	0.02041	0.04934	0.01478	0.02664	0.02428	0.02351	0.03409	0.18574	0.00631	0.02735	0.02709	0.08949
0.12914	0.1759	0.05192	0.03159	0.01624	0.04751	0.0221	0.05167	0.01601	0.0275	0.02563	0.02481	0.03614	0.02605	0.00637	0.0308	0.02832	0.08429
0.12155	0.16753	0.10427	0.04233	0.05915	0.03704	0.03382	0.10269	0.05377	0.04233	0.04233	0.04233	0.03704	0.13372	0.0304	0.09655	0.08944	0.03226
0.11359	0.16179	0.06766	0.02268	0.0162	0.04399	0.02402	0.06676	0.0173	0.01978	0.02087	0.02049	0.03719	0.02602	0.01051	0.04872	0.02118	0.0697
0.10458	0.14837	0.0533	0.04746	0.03069	0.0631	0.02893	0.05438	0.02463	0.03938	0.03961	0.03884	0.05	0.03428	0.01545	0.03106	0.04209	0.046
0.10291	0.14796	0.058	0.05054	0.03369	0.06843	0.03411	0.0596	0.0291	0.04255	0.04307	0.04222	0.0547	0.03895	0.01708	0.03877	0.04515	0.05013
0.10861	0.15654	0.06717	0.0278	0.01692	0.04877	0.02578	0.06736	0.01875	0.02325	0.02456	0.02404	0.04035	0.02812	0.01241	0.04835	0.02488	0.03472
0.10879	0.15542	0.06047	0.03795	0.02245	0.05675	0.02838	0.06158	0.02168	0.03162	0.03222	0.03148	0.04552	0.03224	0.01361	0.04027	0.0337	0.04081
0.12601	0.16631	0.02904	0.05538	0.0427	0.06097	0.01951	0.02979	0.02178	0.04364	0.03823	0.037	0.06097	0.02891	0.00599	0.01901	0.05162	0.04055
0.12275	0.16346	0.03215	0.05898	0.04552	0.06572	0.02246	0.03305	0.02474	0.04704	0.04205	0.04081	0.0452	0.03258	0.0078	0.02096	0.05496	0.04472
0.14612	0.18142	0.01175	0.03392	0.02924	0.03477	0.00852	0.01215	0.01107	0.02488	0.01999	0.01922	0.03477	0.01727	0.00732	0.0177	0.0326	0.02102
0.14562	0.18087	0.01165	0.03258	0.02789	0.03352	0.00821	0.01224	0.01049	0.02377	0.01916	0.01842	0.03352	0.01703	0.00716	0.01803	0.03122	0.02028
0.14106	0.1766	0.01237	0.03488	0.02948	0.03624	0.00788	0.01284	0.01043	0.02587	0.02164	0.02095	0.02312	0.0182	0.00575	0.01556	0.03336	0.02301
0.11973	0.16716	0.06518	0.01985	0.01201	0.03854	0.01856	0.06388	0.01264	0.01636	0.01653	0.01602	0.03054	0.02154	0.00897	0.04537	0.01721	0.07412
0.10773	0.15325	0.0584	0.04275	0.02672	0.06065	0.03015	0.05964	0.02438	0.0361	0.03665	0.03593	0.04907	0.03461	0.01536	0.03746	0.03816	0.04454
0.10269	0.1492	0.06496	0.04113	0.02658	0.06113	0.03313	0.06639	0.02666	0.03513	0.03653	0.03592	0.05105	0.03621	0.01804	0.04619	0.03685	0.04522
0.09195	0.14098	0.08038	0.02906	0.02518	0.05253	0.03266	0.08059	0.0262	0.02554	0.02809	0.02781	0.04681	0.03163	0.01925	0.06539	0.02703	0.03773
0.10376	0.14805	0.05129	0.04303	0.02496	0.05726	0.02282	0.05188	0.01803	0.03348	0.03267	0.03164	0.04172	0.02734	0.00954	0.02768	0.03705	0.03829
0.12493	0.16894	0.04453	0.03774	0.02118	0.04859	0.01793	0.04418	0.01441	0.03068	0.02755	0.02651	0.03391	0.02207	0.00575	0.02245	0.03302	0.03227
0.14085	0.18391	0.03633	0.03678	0.02235	0.04443	0.01512	0.03612	0.01325	0.03075	0.0257	0.02465	0.03016	0.02048	0.00541	0.01757	0.03285	0.09795
0.12423	0.16905	0.05011	0.03153	0.01492	0.04462	0.01737	0.05005	0.01181	0.02529	0.02344	0.02257	0.03265	0.02255	0.00603	0.02582	0.02713	0.03006
0.12777	0.16882	0.03329	0.04302	0.02929	0.04996	0.01573	0.03389	0.01459	0.0339	0.03006	0.02904	0.04996	0.02341	0.00479	0.01477	0.03895	0.03334
0.13201	0.1725	0.03112	0.04044	0.02766	0.04618	0.01363	0.03152	0.01293	0.0318	0.02755	0.02656	0.04618	0.02093	0.00406	0.01692	0.03661	0.03034
0.13497	0.17485	0.02801	0.04089	0.02919	0.04554	0.0129	0.02851	0.01307	0.03204	0.0273	0.02631	0.04554	0.02053	0.00443	0.01602	0.03739	0.02962
0.10285	0.14826	0.06093	0.04182	0.02599	0.06047	0.03072	0.06187	0.02487	0.0353	0.0364	0.03577	0.04977	0.03427	0.01684	0.04034	0.03704	0.04444
0.10598	0.15196	0.06004	0.04597	0.02993	0.06484	0.03358	0.06152	0.02777	0.03925	0.03992	0.03916	0.05275	0.03773	0.01652	0.04139	0.04132	0.04794
0.11358	0.15938	0.05585	0.03854	0.02262	0.05571	0.02672	0.05669	0.02051	0.0322	0.03213	0.03137	0.04422	0.03137	0.01237	0.03406	0.03437	0.04025
0.10363	0.15116	0.06575	0.03807	0.02428	0.05913	0.03242	0.06675	0.02551	0.03268	0.03402	0.0334	0.04923	0.03462	0.01545	0.04828	0.03423	0.04332
0.14316	0.18253	0.02488	0.04315	0.03291	0.0459	0.01368	0.02486	0.017	0.03507	0.02777	0.02667	0.0459	0.01828	0.00924	0.02217	0.04007	0.02866
0.15499	0.19164	0.01621	0.03405	0.02843	0.03451	0.0106	0.01661	0.01434	0.0267	0.01963	0.01873	0.03451	0.0138	0.00969	0.02264	0.03217	0.0196
0.14482	0.18306	0.02088	0.03885	0.03009	0.04117	0.01046	0.02129	0.01303	0.03057	0.02472	0.02377	0.04117	0.01763	0.0056	0.01885	0.02297	0.02593
0.14586	0.18403	0.02172	0.03509	0.02668	0.03725	0.00931	0.0222	0.01163	0.02725	0.02167	0.02076	0.03725	0.01641	0.00585	0.01971	0.03244	0.02291
0.1383	0.18124	0.03572	0.0396	0.02499	0.04795	0.01682	0.03572	0.01444	0.03319	0.02838	0.02734	0.03334	0.02329	0.00441	0.01554	0.03585	0.03246
0.12527	0.17211	0.05221	0.03168	0.01505	0.04726	0.02079	0.05174	0.01456	0.02667	0.02442	0.02344	0.03429	0.02384	0.00564	0.03169	0.02768	0.08237
0.10934	0.15612	0.0634	0.03315	0.01999	0.0527	0.02791	0.06386	0.02126	0.02826	0.02924	0.0287	0.04398	0.03105	0.01497	0.04303	0.02984	0.03868
0.10346	0.1521	0.07505	0.02073	0.01891	0.04363	0.02508	0.0741	0.01901	0.0178	0.01968	0.01941	0.03777	0.02562	0.01334	0.05735	0.01976	0.06161
0.0886	0.13706	0.07824	0.03399	0.0257	0.05731	0.03464	0.0788	0.02781	0.02935	0.03209	0.03171	0.05026	0.03368	0.02035	0.06294	0.03046	0.04111
0.10545	0.15034	0.05577	0.03524	0.01747	0.05119	0.02108	0.05529	0.01527	0.02781	0.0276	0.02678	0.03868	0.02434	0.00864	0.03268	0.02987	0.03462
0.1313	0.17132	0.03085	0.04154	0.02949	0.04566	0.01358	0.03095	0.01567	0.03278	0.02751	0.02646	0.04566	0.0182	0.00866	0.02399	0.03761	0.02901
0.13081	0.17073	0.03276	0.03655	0.0249	0.0406	0.01147	0.03266	0.01294	0.02818	0.0236	0.02263	0.0406	0.01696	0.00756	0.02209	0.03269	0.02531
0.14118	0.18372	0.03576	0.03508	0.0211	0.04226	0.01385	0.03526	0.01239	0.02947	0.02439	0.02341	0.02874	0.01932	0.00526	0.01709	0.03127	0.09821
0.12508	0.1705	0.05085	0.03168	0.01537	0.04614	0.01945	0.05081	0.01346	0.02609	0.02458	0.02377	0.03481	0.0244	0.00632	0.02711	0.02769	0.03204
0.12844	0.17508	0.05457	0.02687	0.01301	0.04313	0.02033	0.0536	0.01438	0.0239	0.02224	0.02159	0.03362	0.0241	0.00681	0.03245	0.02408	0.08245
0.11524	0.16332	0.06654	0.02174	0.01489	0.0427	0.02285	0.06554	0.01597	0.01883	0.01972	0.01932	0.0357	0.02496	0.00942	0.04725	0.02014	0.07075
0.1181	0.16151	0.04678	0.03842	0.02196	0.05094	0.01997	0.04681	0.01578	0.03132	0.0299	0.02908	0.03825	0.02516	0.00798	0.02213	0.03374	0.03571
0.1231	0.16655	0.04331	0.04008	0.02377	0.05128	0.01921	0.04358	0.01556	0.03249	0.03001	0.02905	0.03704	0.02486	0.00624	0.01991	0.03548	0.03515
0.13483	0.177	0.03852	0.03323	0.01889	0.04068	0.01284	0.0378	0.01101	0.02701	0.02277	0.02183	0.0276	0.01792	0.00476	0.01759	0.02903	0.02644
0.14265	0.182	0.02637	0.03677	0.02641	0.03997	0.01082	0.02638	0.01303	0.02947	0.02358	0.02261	0.03997	0.01628	0.0064	0.02038	0.03352	0.02499
0.15242	0.18975	0.01816	0.03139	0.02486	0.03277	0.00808	0.01844	0.01091	0.02384	0.01795	0.01705	0.03277	0.01523	0.00664	0.02086	0.02928	0.01897
0.14095	0.1792	0.02295	0.03549	0.02673	0.03795	0.00936	0.02349	0.01135	0.02715	0.02213	0.02123	0.03795	0.01693	0.0058	0.01945	0.03271	0.02354
0.13393	0.17644	0.04029	0.03203	0.01741	0.04072	0.01334	0.04024	0.00925	0.02527	0.02205	0.02115	0.02851	0.02028	0.00425	0.01488	0.02799	0.02693
0.12729	0.17078	0.045	0.03242	0.01648	0.04344	0.01587	0.04425	0.01151	0.02648	0.02381	0.02297	0.03146	0.02072	0.00498	0.02086	0.02811	0.02943
0.13892	0.1821	0.03936	0.03239	0.01766	0.04057	0.01349	0.03888	0.01054	0.02666	0.02226	0.02128	0.02762	0.01905	0.004	0.01701	0.02834	0.0953
0.13211	0.1783	0.05267	0.02579	0.0111	0.0407	0.01796	0.05192	0.01198	0.02227	0.02046	0.01977	0.0407	0.02249	0.0056	0.02954	0.02262	0.08801
0.06572	0.1097	0.07983	0.0214	0.01475	0.04458	0.02001	0.07162	0.01491	0.01729	0.01892	0.01855	0.0363	0.01522	0.00989	0.05475	0.01633	0.02693
0.11963	0.16279	0.04245	0.04459	0.02815	0.05586	0.02133	0.04278	0.01847	0.03641	0.03388	0.03288	0.04049	0.02699	0.00721	0.02016	0.03978	0.03863
0.11095	0.159	0.06823	0.02937	0.02056	0.05034	0.02917	0.06885	0.02252	0.02589	0.02718	0.02678	0.04344	0.0317	0.01569	0.04997	0.0275	0.03765
0.11442	0.16327	0.07433	0.01908	0.0205	0.0407	0.02503	0.07429	0.02028	0.01716	0.01866	0.0185	0.03631	0.07178	0.01443	0.0573	0.01977	0.05989
0.11729	0.16653	0.07735	0.01825	0.02469	0.03884	0.02614	0.07764	0.02362	0.01733	0.01836	0.01833	0.03602	0.0671	0.01576	0.06209	0.02082	0.0523
0.11842	0.16727	0.07117	0.01906	0.01887	0.04057	0.02429	0.07117	0.01899	0.01704	0.0184	0.01819	0.03569	0.07387	0.01244	0.05384	0.0195	0.06143
0.11801	0.16531	0.06011	0.03235	0.01896	0.05145	0.02677	0.06076	0.02009	0.02797	0.02825	0.02763	0.04212	0.03064	0.01148	0.04014	0.02948	0.03789
0.13159	0.17717	0.04713	0.03512	0.01903	0.04878	0.02084	0.04744	0.01542	0.02981	0.02738	0.02647	0.03634	0.02629	0.00583	0.02407	0.03142	0.08797
0.14016	0.18384	0.03781	0.03703	0.02204	0.04588	0.01645	0.03784	0.01336	0.03103	0.02647	0.02542	0.03181	0.02235	0.00432	0.01654	0.03316	0.09675
0.14038	0.18714	0.04924	0.03006	0.01607	0.04501	0.02168	0.04969	0.01564	0.02702	0.02478	0.02404	0.035	0.18577	0.00649	0.02717	0.02775	0.0876
0.11584	0.1623	0.06163	0.02329	0.01147	0.04168	0.01978	0.0595	0.01344	0.02042	0.01986	0.01935	0.0334	0.02197	0.00733	0.03934	0.02048	0.07301
0.13821	0.18401	0.0462	0.03293	0.01797	0.04619	0.0206	0.04594	0.0157	0.0296	0.02632	0.02549	0.03487	0.18913	0.00651	0.02332	0.03006	0.09142
0.1351	0.18105	0.04685	0.03697	0.0219	0.0512	0.02383	0.04712	0.01863	0.033	0.0301	0.02923	0.03922	0.18736	0.00774	0.025	0.03412	0.09014
0.12304	0.17108	0.06334	0.02106	0.01407	0.04089	0.02185	0.06233	0.01521	0.01874	0.01902	0.01861	0.0339	0.0804	0.00812	0.04378	0.01973	0.07503
0.13295	0.18171	0.06595	0.01662	0.01764	0.03646	0.02245	0.06642	0.018	0.01547	0.01618	0.016	0.03223	0.16901	0.01054	0.04846	0.02594	0.06008
0.1337	0.18137	0.05733	0.02425	0.01435	0.04205	0.0226	0.05741	0.01596	0.02228	0.02152	0.02104	0.03474	0.17683	0.00843	0.03677	0.0231	0.07558
0.12268	0.16676	0.04661	0.03795	0.02187	0.05069	0.02054	0.04744	0.01513	0.03056	0.02886	0.02797	0.03788	0.02723	0.00862	0.02082	0.03365	0.03534
0.13445	0.17426	0.02994	0.03647	0.02485	0.04109	0.01111	0.03012	0.01093	0.02831	0.02394	0.02301	0.04109	0.01812	0.00432	0.01963	0.03286	0.0263
0.1314	0.17367	0.03848	0.03609	0.02135	0.04414	0.01423	0.03855	0.01143	0.02859	0.02493	0.02394	0.03022	0.02051	0.00421	0.01573	0.03183	0.02894
0.13208	0.17663	0.04336	0.03789	0.02195	0.04947	0.01977	0.04297	0.0162	0.03249	0.02894	0.02797	0.03579	0.02457	0.00647	0.02169	0.03389	0.08995
0.10911	0.15431	0.05795	0.03773	0.02204	0.05525	0.02679	0.05838	0.02102	0.03177	0.03233	0.03172	0.04499	0.03075	0.01409	0.03565	0.03339	0.04046
0.10828	0.15403	0.06105	0.03368	0.01903	0.05218	0.02588	0.06111	0.01972	0.02831	0.0292	0.02866	0.04305	0.02919	0.01394	0.03911	0.02971	0.03803
0.11611	0.16173	0.05383	0.03867	0.02236	0.05522	0.02571	0.05428	0.02008	0.03261	0.03212	0.03135	0.04336	0.03019	0.01072	0.03207	0.03446	0.03987
0.13418	0.17919	0.04405	0.03741	0.0217	0.04985	0.02092	0.04409	0.01653	0.03233	0.02918	0.02825	0.03692	0.02647	0.00633	0.02155	0.03378	0.09067
0.11923	0.16185	0.04157	0.04156	0.02546	0.05149	0.01791	0.04187	0.01514	0.03285	0.03014	0.02913	0.03626	0.02384	0.00605	0.01783	0.03669	0.03446
0.12765	0.17079	0.0405	0.03989	0.02412	0.04981	0.01791	0.04073	0.01468	0.03231	0.0291	0.02809	0.03522	0.02375	0.00518	0.01779	0.03547	0.03371
0.13217	0.17276	0.03165	0.0408	0.02787	0.04641	0.01393	0.03185	0.0137	0.03234	0.02784	0.02683	0.04641	0.0202	0.00524	0.0186	0.0256	0.03036
0.11616	0.16529	0.07707	0.0178	0.02391	0.03876	0.02556	0.07701	0.0229	0.01676	0.01788	0.01784	0.03574	0.15871	0.01527	0.06121	0.0198	0.05323
0.12732	0.17634	0.07645	0.01388	0.02473	0.03253	0.02241	0.07657	0.02345	0.01349	0.01388	0.01388	0.03054	0.0692	0.01437	0.06118	0.03257	0.04913
0.12194	0.17084	0.07045	0.01993	0.01987	0.04077	0.02533	0.07102	0.02011	0.01837	0.01945	0.01927	0.03636	0.07452	0.01339	0.05352	0.02086	0.06094
0.10601	0.14783	0.04333	0.04613	0.03062	0.05684	0.02133	0.04418	0.01851	0.03636	0.03547	0.03465	0.04266	0.02843	0.0115	0.01674	0.04083	0.0399
0.13377	0.17806	0.04531	0.03116	0.01546	0.04154	0.01523	0.04444	0.01157	0.02597	0.02261	0.02171	0.02917	0.01933	0.00521	0.02276	0.02688	0.0898
0.12476	0.1703	0.05203	0.03061	0.01445	0.04529	0.01911	0.05167	0.01336	0.02533	0.024	0.02322	0.03427	0.02357	0.00653	0.02902	0.02662	0.03149
0.12835	0.16947	0.03776	0.03451	0.02089	0.04082	0.01183	0.03731	0.01072	0.02666	0.02283	0.02186	0.02692	0.01759	0.00525	0.01765	0.0302	0.0258
0.12744	0.1688	0.03682	0.03721	0.0231	0.04392	0.01325	0.0366	0.01182	0.02898	0.02497	0.02396	0.02913	0.01873	0.00489	0.01705	0.03281	0.02802
0.12739	0.1649	0.01906	0.04206	0.03436	0.04537	0.01204	0.01982	0.01284	0.03124	0.0277	0.02693	0.04537	0.02308	0.00704	0.01162	0.03984	0.03018
0.12838	0.1662	0.02073	0.0427	0.03428	0.04606	0.01214	0.02146	0.01349	0.0322	0.0284	0.02757	0.04606	0.02289	0.00589	0.01243	0.04022	0.03067
0.12692	0.16487	0.02146	0.04163	0.03295	0.04502	0.01161	0.02221	0.01284	0.03122	0.0275	0.02667	0.04502	0.02184	0.00552	0.0134	0.03898	0.0297
0.1001	0.14324	0.04655	0.04818	0.03043	0.0604	0.02247	0.047	0.01965	0.03734	0.03618	0.03513	0.0434	0.02755	0.00917	0.02306	0.04187	0.04047
0.08239	0.12826	0.06672	0.03888	0.02109	0.05925	0.02761	0.0661	0.02123	0.03032	0.03262	0.03189	0.04687	0.02789	0.01418	0.04631	0.03175	0.03962
0.06072	0.10375	0.07746	0.06183	0.04444	0.08342	0.04825	0.07895	0.04425	0.05281	0.05717	0.05666	0.07216	0.04694	0.03249	0.06148	0.05066	0.0597
0.07621	0.11767	0.06076	0.07692	0.05823	0.0934	0.04429	0.06223	0.04622	0.0632	0.06507	0.06399	0.07271	0.05092	0.02498	0.04606	0.06644	0.06744
0.06786	0.11116	0.07426	0.0711	0.05205	0.0931	0.05157	0.07623	0.0488	0.05991	0.06413	0.06328	0.07708	0.05269	0.02892	0.06104	0.05966	0.06703
0.065	0.10752	0.07752	0.07284	0.05435	0.09475	0.05448	0.07968	0.05174	0.06187	0.06648	0.0657	0.07994	0.05483	0.03216	0.06468	0.05961	0.06848
0.1272	0.17368	0.05278	0.03052	0.01518	0.04644	0.02128	0.05233	0.01525	0.02642	0.02476	0.02399	0.03557	0.02529	0.00646	0.03081	0.02718	0.08285
0.12336	0.16521	0.03941	0.03847	0.02334	0.04713	0.01552	0.03927	0.01299	0.03047	0.02755	0.02662	0.0331	0.02114	0.005	0.0165	0.0339	0.03154
0.12398	0.16801	0.0452	0.03696	0.02041	0.04888	0.01873	0.04493	0.0144	0.03023	0.0277	0.02676	0.03537	0.02348	0.00561	0.02215	0.03242	0.03329
0.12761	0.17364	0.05175	0.03125	0.01577	0.04662	0.02104	0.05155	0.01508	0.02675	0.02526	0.02451	0.03594	0.02561	0.00692	0.02902	0.02782	0.08359
0.13783	0.17922	0.03725	0.03275	0.01986	0.03815	0.01199	0.03572	0.01359	0.02767	0.02208	0.02119	0.02478	0.01469	0.00796	0.02177	0.02869	0.02405
0.1366	0.18063	0.04601	0.02908	0.01542	0.0379	0.01454	0.04324	0.01449	0.0267	0.02175	0.021	0.0261	0.01601	0.00955	0.02507	0.02525	0.09112
0.11665	0.16225	0.05588	0.03199	0.01654	0.04874	0.02258	0.05541	0.01659	0.02701	0.02664	0.026	0.03873	0.02629	0.00987	0.03294	0.0282	0.03499
0.11139	0.15898	0.06421	0.03219	0.01982	0.05249	0.02833	0.0648	0.02148	0.02769	0.02867	0.02813	0.04379	0.03128	0.01354	0.04521	0.02926	0.03858
0.12017	0.16615	0.05353	0.0362	0.02032	0.05267	0.02467	0.054	0.01856	0.03059	0.02983	0.02904	0.04122	0.02946	0.00969	0.0313	0.03238	0.03791
0.12765	0.17226	0.04738	0.03232	0.01589	0.04471	0.01728	0.04699	0.01221	0.02648	0.02412	0.02324	0.03255	0.02218	0.00499	0.02354	0.02804	0.03035
0.12614	0.17168	0.04833	0.04057	0.02451	0.05537	0.02518	0.04884	0.02008	0.03488	0.03293	0.03202	0.04235	0.03071	0.00873	0.02692	0.0368	0.03999
0.13391	0.17831	0.04086	0.04145	0.02569	0.05255	0.021	0.04088	0.01781	0.03552	0.03147	0.03041	0.03777	0.02664	0.00662	0.02027	0.03755	0.09246
0.11366	0.1627	0.07612	0.01673	0.02215	0.03876	0.0242	0.07533	0.02128	0.01536	0.0167	0.01661	0.03503	0.06787	0.01319	0.05954	0.01839	0.0545
0.12427	0.17306	0.07387	0.01097	0.02101	0.03184	0.01969	0.07276	0.02017	0.01026	0.01097	0.01097	0.02863	0.06783	0.01067	0.05689	0.01979	0.05242
0.11291	0.16202	0.07579	0.02119	0.02244	0.04271	0.02717	0.07622	0.02223	0.01929	0.02087	0.02072	0.03851	0.0708	0.0163	0.05968	0.0219	0.05913
0.11653	0.16579	0.07363	0.02291	0.02295	0.04409	0.02861	0.07458	0.02314	0.02126	0.0226	0.02243	0.03989	0.07171	0.01597	0.058	0.02377	0.05906
0.11565	0.16088	0.05767	0.02623	0.01098	0.04246	0.01824	0.05579	0.01245	0.02188	0.02121	0.02061	0.03309	0.02089	0.0071	0.03393	0.02226	0.02938
0.12404	0.17044	0.05341	0.03499	0.01957	0.05161	0.02461	0.05395	0.01842	0.03001	0.02906	0.02829	0.04052	0.02948	0.00904	0.03161	0.03159	0.03744
0.13171	0.17871	0.05238	0.03157	0.01714	0.04799	0.02342	0.05273	0.01712	0.02794	0.02632	0.02556	0.0375	0.18114	0.00725	0.03117	0.02892	0.08562
0.12833	0.17458	0.05102	0.0336	0.01792	0.0491	0.02243	0.05134	0.01636	0.02882	0.02713	0.02631	0.03765	0.02748	0.00703	0.0285	0.0302	0.08464
0.12233	0.1682	0.05088	0.04206	0.02591	0.05798	0.02734	0.05194	0.02167	0.03586	0.0345	0.03358	0.04484	0.03306	0.01018	0.02955	0.0382	0.04203
0.13301	0.18064	0.0551	0.02702	0.01448	0.04442	0.02274	0.05531	0.0161	0.02423	0.02307	0.02242	0.03532	0.17758	0.00723	0.03487	0.02503	0.07907
0.14894	0.19512	0.04374	0.03039	0.01609	0.04275	0.01929	0.04407	0.01393	0.02768	0.02389	0.02304	0.03192	0.19184	0.00536	0.02095	0.02802	0.03089
0.14147	0.18798	0.0488	0.02757	0.01317	0.0417	0.01904	0.04915	0.0128	0.02429	0.0218	0.02103	0.03173	0.18788	0.00574	0.02577	0.02498	0.09204
0.136	0.18061	0.04349	0.03365	0.01814	0.04503	0.01769	0.04396	0.01225	0.02777	0.02467	0.02372	0.0327	0.02462	0.00553	0.01794	0.02995	0.09203
0.14207	0.18314	0.02877	0.04258	0.03004	0.04794	0.01488	0.02895	0.01499	0.03486	0.02901	0.02791	0.04794	0.02174	0.00503	0.02055	0.0391	0.0315
0.11429	0.16299	0.06839	0.02504	0.01867	0.0466	0.02706	0.06862	0.02004	0.02225	0.02342	0.02305	0.04003	0.02931	0.01235	0.05085	0.02396	0.06641
0.11231	0.16062	0.06605	0.03385	0.02305	0.05477	0.03182	0.06732	0.02477	0.02995	0.03097	0.03044	0.0465	0.03462	0.01515	0.04888	0.03161	0.04116
0.12444	0.17007	0.04993	0.03398	0.01724	0.04841	0.02039	0.04978	0.01471	0.0282	0.02628	0.02538	0.03586	0.02474	0.00571	0.02736	0.02979	0.03331
0.13773	0.18131	0.03917	0.03601	0.02093	0.04465	0.01573	0.03878	0.01332	0.03009	0.02549	0.02445	0.03055	0.02051	0.00577	0.01887	0.03188	0.09493
0.14527	0.18989	0.03807	0.03696	0.02197	0.04632	0.01777	0.03792	0.01473	0.03232	0.02692	0.02582	0.03213	0.19901	0.00549	0.01748	0.0335	0.09924
0.12036	0.16951	0.06969	0.02243	0.02028	0.0436	0.0271	0.07049	0.02085	0.02054	0.0217	0.02145	0.0385	0.07447	0.0133	0.05329	0.02285	0.06163
0.12575	0.1714	0.04741	0.04155	0.02504	0.05606	0.02498	0.04781	0.02015	0.03555	0.03318	0.03218	0.0419	0.02985	0.00778	0.02721	0.03752	0.03976
0.12678	0.17033	0.04188	0.04079	0.02471	0.05065	0.01853	0.04174	0.01596	0.03329	0.02971	0.02863	0.03511	0.02304	0.00718	0.02137	0.03615	0.03385
0.12883	0.17182	0.03922	0.04202	0.02654	0.05055	0.01778	0.0392	0.01607	0.0341	0.02987	0.02874	0.03427	0.02245	0.00749	0.02022	0.03747	0.03333
0.11873	0.1616	0.04523	0.03777	0.02205	0.04696	0.01646	0.04532	0.01378	0.02943	0.02623	0.02518	0.03206	0.02135	0.00903	0.02239	0.03289	0.03014
0.11027	0.15859	0.07529	0.01918	0.02015	0.04082	0.02463	0.0747	0.02003	0.01711	0.01868	0.01852	0.03648	0.02637	0.01525	0.05703	0.01947	0.06177
0.10807	0.15713	0.07417	0.02712	0.0231	0.04907	0.03066	0.07506	0.02417	0.02438	0.02613	0.02585	0.04357	0.03214	0.01727	0.05823	0.02635	0.06351
0.12565	0.17319	0.06384	0.01698	0.01131	0.03493	0.0166	0.06224	0.01215	0.01432	0.01406	0.01357	0.02725	0.01959	0.00711	0.0437	0.01457	0.07694
0.11286	0.16075	0.06639	0.02265	0.01426	0.04341	0.02275	0.0655	0.01564	0.01921	0.02003	0.01958	0.0358	0.02492	0.00996	0.0465	0.02051	0.07022
0.1458	0.1873	0.02837	0.04471	0.03225	0.04971	0.01625	0.02816	0.01758	0.03788	0.03057	0.0294	0.03263	0.02223	0.0078	0.02383	0.04149	0.03263
0.15217	0.19652	0.03706	0.03204	0.01792	0.03983	0.01458	0.03656	0.01227	0.02857	0.02271	0.02172	0.02713	0.20256	0.00566	0.0166	0.02879	0.10321
0.14097	0.18456	0.03685	0.03835	0.02357	0.04689	0.01691	0.03662	0.01474	0.03274	0.02757	0.02651	0.03239	0.02254	0.00572	0.01745	0.03459	0.0977
0.1366	0.18366	0.05224	0.02671	0.0129	0.04244	0.02025	0.05225	0.01392	0.02376	0.02186	0.02115	0.03278	0.1824	0.00601	0.03062	0.02426	0.08366
0.11918	0.16703	0.06091	0.0283	0.0158	0.04786	0.02469	0.06097	0.0178	0.02437	0.02456	0.02396	0.03869	0.02785	0.00897	0.04154	0.02568	0.0758
0.12441	0.17144	0.05509	0.0339	0.01922	0.05142	0.0256	0.05576	0.01896	0.02931	0.02854	0.02779	0.04073	0.03026	0.00929	0.03427	0.03086	0.08141
0.11197	0.16015	0.07447	0.02139	0.02051	0.04249	0.02589	0.0746	0.02083	0.01907	0.02068	0.0205	0.03813	0.02829	0.01684	0.0563	0.02133	0.06502
0.10777	0.15689	0.07622	0.02546	0.02342	0.04729	0.02992	0.07719	0.02394	0.02295	0.02475	0.02452	0.04229	0.03136	0.01795	0.0606	0.0251	0.06197
0.10756	0.15681	0.07589	0.02624	0.02372	0.0482	0.03058	0.07684	0.02438	0.02366	0.02549	0.02524	0.04309	0.03191	0.01782	0.06049	0.02579	0.06509
0.09389	0.14267	0.08101	0.0357	0.03014	0.05811	0.03812	0.08279	0.03182	0.03224	0.03466	0.03437	0.05252	0.03776	0.02397	0.06725	0.0335	0.04372
0.09387	0.13935	0.06698	0.05792	0.04126	0.07891	0.04408	0.06888	0.03912	0.05027	0.05206	0.05124	0.06547	0.04723	0.02191	0.05213	0.05176	0.0591
0.11441	0.15506	0.03348	0.06415	0.05032	0.07057	0.02385	0.03425	0.02784	0.05018	0.04488	0.04352	0.04734	0.03328	0.0088	0.02477	0.05956	0.04689
0.10734	0.14819	0.03941	0.04784	0.03429	0.05742	0.02156	0.0405	0.01965	0.03791	0.037	0.03628	0.04389	0.02987	0.01329	0.0137	0.04329	0.04133
0.10147	0.14839	0.06807	0.02443	0.01271	0.04447	0.02076	0.06647	0.01404	0.01885	0.02008	0.0195	0.03516	0.02228	0.01084	0.04728	0.02014	0.02924
0.14188	0.18493	0.03505	0.03802	0.02364	0.04557	0.01549	0.0351	0.01326	0.03168	0.02644	0.02535	0.03085	0.02154	0.00417	0.01601	0.03422	0.09915
0.13396	0.17699	0.03845	0.03741	0.02229	0.04635	0.016	0.03877	0.01252	0.0302	0.02639	0.02536	0.03222	0.02266	0.00404	0.01491	0.0333	0.03092
0.08543	0.13302	0.07658	0.0248	0.01778	0.04891	0.02601	0.07413	0.01897	0.02052	0.02284	0.02247	0.04146	0.02407	0.01282	0.05755	0.02128	0.03261
0.11203	0.15891	0.06014	0.03437	0.01945	0.05341	0.02671	0.06056	0.02007	0.02901	0.02944	0.02877	0.04306	0.03007	0.0115	0.03995	0.03061	0.03851
0.13189	0.17474	0.03688	0.0431	0.02792	0.05169	0.0183	0.03698	0.01647	0.0354	0.03093	0.0298	0.03558	0.0239	0.00602	0.01847	0.03882	0.03461
0.12255	0.16761	0.04646	0.04186	0.02484	0.0554	0.02307	0.0468	0.01865	0.03481	0.0324	0.03136	0.04045	0.02789	0.00685	0.02517	0.03731	0.03834
0.11717	0.16379	0.05489	0.03771	0.02137	0.05519	0.02622	0.05543	0.02	0.03187	0.0312	0.03034	0.04281	0.03021	0.00902	0.03454	0.03367	0.03935
0.13599	0.17643	0.02847	0.04407	0.03176	0.0491	0.01478	0.02879	0.01527	0.03509	0.02971	0.02861	0.0491	0.02164	0.00525	0.01819	0.04045	0.03198
0.13897	0.18044	0.02992	0.04625	0.03303	0.05252	0.01729	0.03037	0.01727	0.03801	0.03233	0.03118	0.05252	0.02466	0.00527	0.01812	0.04265	0.03514
0.14136	0.18225	0.03009	0.0379	0.02552	0.04302	0.01267	0.03006	0.01261	0.03071	0.02515	0.02412	0.04302	0.01881	0.00488	0.01787	0.0343	0.02764
0.13422	0.17461	0.03283	0.03545	0.02308	0.04061	0.01136	0.03268	0.01112	0.0277	0.02335	0.02241	0.04061	0.01749	0.00498	0.01891	0.03158	0.0259
0.1267	0.16692	0.03335	0.037	0.02457	0.04237	0.01191	0.03357	0.01106	0.02811	0.02429	0.02334	0.04237	0.01892	0.00548	0.01663	0.03305	0.02695
0.08817	0.13523	0.08359	0.0124	0.02189	0.03691	0.01996	0.07801	0.01982	0.01079	0.01228	0.0122	0.03228	0.06052	0.01141	0.06283	0.01289	0.0228
0.1161	0.1654	0.07867	0.0162	0.02441	0.03722	0.02455	0.07848	0.02299	0.01526	0.0163	0.01629	0.03418	0.06594	0.01479	0.06365	0.01908	0.05115
0.12714	0.17625	0.07492	0.01231	0.02344	0.03214	0.02136	0.07451	0.02234	0.01186	0.01231	0.01231	0.02973	0.06494	0.01223	0.05939	0.03298	0.04863
0.10763	0.15715	0.08343	0.0217	0.02832	0.04257	0.02954	0.08392	0.02681	0.02055	0.02187	0.02184	0.03979	0.06347	0.01942	0.06987	0.0251	0.05097
0.10186	0.1499	0.0728	0.04061	0.03043	0.06233	0.03894	0.07471	0.03227	0.03648	0.03834	0.03789	0.05485	0.04052	0.02168	0.0578	0.03779	0.04779
0.11367	0.16308	0.0785	0.01767	0.02406	0.03921	0.02559	0.07842	0.02283	0.01639	0.01774	0.01768	0.03575	0.06632	0.01511	0.06353	0.01969	0.05261
0.10716	0.15661	0.07968	0.0245	0.02589	0.04609	0.03064	0.08073	0.02561	0.02259	0.02433	0.02418	0.04209	0.03157	0.01922	0.06538	0.02505	0.06417
0.11401	0.15804	0.04591	0.05152	0.03428	0.06512	0.02745	0.04677	0.0245	0.04263	0.04057	0.03946	0.04811	0.03359	0.00993	0.02624	0.04636	0.04582
0.12215	0.16621	0.04584	0.03782	0.0213	0.05015	0.01949	0.04641	0.01431	0.03019	0.0281	0.02714	0.0366	0.02571	0.0068	0.02056	0.03329	0.03419
0.12407	0.17235	0.06207	0.02732	0.01799	0.04714	0.02669	0.0627	0.0198	0.02465	0.0249	0.02443	0.03972	0.08263	0.01097	0.04351	0.02609	0.07215
0.08224	0.12817	0.08761	0.01179	0.02304	0.03521	0.01898	0.08025	0.01987	0.00958	0.01159	0.0115	0.03068	0.01558	0.01319	0.06537	0.01167	0.02
0.13295	0.1812	0.06226	0.01662	0.01363	0.03571	0.0196	0.06176	0.01467	0.01514	0.01521	0.01487	0.02976	0.17191	0.00743	0.04328	0.01795	0.06549
0.13487	0.18369	0.06684	0.01393	0.01844	0.03369	0.02117	0.06703	0.01863	0.01307	0.01381	0.01372	0.03011	0.16799	0.01004	0.04986	0.03008	0.05594
0.131	0.1801	0.07135	0.01539	0.02225	0.03483	0.0235	0.07199	0.02174	0.01484	0.01546	0.01545	0.03221	0.16402	0.01286	0.05563	0.0323	0.05194
0.10436	0.15292	0.08707	0.0152	0.0305	0.03456	0.02356	0.08357	0.02752	0.01502	0.0152	0.0152	0.03284	0.05605	0.01595	0.07058	0.01916	0.04129
0.08563	0.13185	0.06887	0.03968	0.0231	0.05956	0.02926	0.06935	0.02279	0.03134	0.03348	0.03273	0.04726	0.03026	0.01768	0.04937	0.03317	0.04046
0.12605	0.17105	0.0477	0.03563	0.01932	0.04858	0.01994	0.04678	0.01596	0.03037	0.02758	0.02666	0.03545	0.02349	0.00751	0.02656	0.03136	0.03344
0.11565	0.16374	0.06389	0.02918	0.01821	0.04971	0.02715	0.06423	0.02033	0.0255	0.02625	0.02573	0.04146	0.03001	0.01146	0.04543	0.02694	0.07382
0.13942	0.17877	0.02456	0.04321	0.03268	0.04659	0.01309	0.02497	0.01486	0.034	0.02811	0.02704	0.04659	0.02013	0.00607	0.02815	0.04008	0.02969
0.14098	0.18004	0.02294	0.04624	0.03604	0.0495	0.0141	0.02323	0.01659	0.0369	0.03081	0.02976	0.0495	0.0221	0.00576	0.01843	0.04335	0.03236
0.08966	0.13782	0.08455	0.01851	0.0242	0.04241	0.02558	0.08165	0.0226	0.01631	0.01839	0.01829	0.03828	0.02343	0.01638	0.0667	0.01851	0.02826
0.11336	0.16197	0.06978	0.03139	0.02383	0.05232	0.03215	0.07142	0.02551	0.02827	0.02962	0.02924	0.04592	0.03505	0.01777	0.0533	0.0301	0.07015
0.11869	0.16648	0.06205	0.03464	0.02267	0.05432	0.03057	0.06338	0.02377	0.03069	0.0312	0.03063	0.04567	0.03462	0.01431	0.04369	0.03238	0.07687
0.11615	0.16473	0.06702	0.03033	0.02196	0.05118	0.03061	0.06826	0.02381	0.02726	0.02831	0.02789	0.04427	0.03366	0.01513	0.04998	0.02901	0.07047
0.11954	0.16883	0.07744	0.01901	0.0256	0.03899	0.0269	0.07812	0.02455	0.01822	0.01914	0.01912	0.03649	0.06751	0.01674	0.06257	0.02321	0.05192
0.12513	0.1745	0.07242	0.01928	0.02263	0.03963	0.02639	0.07358	0.02228	0.01821	0.01927	0.01917	0.0362	0.07178	0.01453	0.05731	0.02525	0.05563
0.11267	0.16196	0.07618	0.02202	0.02371	0.04366	0.02836	0.07669	0.02345	0.02034	0.02186	0.02173	0.03976	0.06937	0.01639	0.0607	0.023	0.05716
0.11226	0.16184	0.08213	0.02222	0.02907	0.04239	0.03018	0.08312	0.02766	0.02134	0.02239	0.02238	0.04007	0.06387	0.01955	0.06887	0.02439	0.05014
0.12158	0.1708	0.07287	0.01623	0.02081	0.03759	0.02364	0.0729	0.02025	0.01489	0.01611	0.01601	0.03367	0.0705	0.0122	0.05684	0.01885	0.05537
0.10707	0.15667	0.08425	0.0249	0.03028	0.0454	0.03235	0.08551	0.02908	0.02375	0.0251	0.02507	0.0428	0.06407	0.02174	0.07156	0.02665	0.05198
0.10003	0.14582	0.06476	0.02636	0.01134	0.04551	0.02014	0.06286	0.01344	0.02062	0.02154	0.02094	0.03595	0.02147	0.00925	0.042	0.02161	0.0303
0.11904	0.16532	0.05749	0.03131	0.01662	0.04847	0.02312	0.05815	0.01636	0.02591	0.02586	0.02518	0.03861	0.02798	0.01104	0.0348	0.02781	0.03473
0.12017	0.16599	0.0535	0.03649	0.02073	0.05263	0.02448	0.05445	0.01816	0.0304	0.02976	0.02897	0.04117	0.02993	0.01065	0.03059	0.03264	0.03782
0.14141	0.17932	0.01872	0.04072	0.03254	0.04293	0.01043	0.01921	0.01294	0.03115	0.02546	0.02451	0.04293	0.01863	0.00506	0.01786	0.03827	0.02678
0.14273	0.1798	0.0163	0.03942	0.03246	0.0409	0.00961	0.01685	0.013	0.02989	0.02428	0.02338	0.0409	0.0177	0.0062	0.01873	0.03731	0.02522
0.14641	0.18276	0.01358	0.03744	0.03142	0.03876	0.00865	0.01401	0.01161	0.02825	0.02302	0.02221	0.03876	0.01834	0.00546	0.01667	0.03575	0.02418
0.11051	0.15517	0.05895	0.043	0.0292	0.05946	0.03156	0.06074	0.02585	0.0367	0.03719	0.03658	0.04946	0.03723	0.0211	0.03618	0.03932	0.04503
0.12449	0.1717	0.06302	0.02038	0.01138	0.03786	0.01804	0.06243	0.0121	0.01659	0.01656	0.01601	0.0297	0.02211	0.00951	0.04256	0.01778	0.08197
0.11276	0.15927	0.05882	0.04156	0.02624	0.06003	0.03094	0.06034	0.0246	0.03554	0.03579	0.03503	0.04856	0.03557	0.01452	0.03908	0.03765	0.04432
0.12236	0.168	0.05437	0.02912	0.01327	0.04406	0.0185	0.05441	0.01214	0.02326	0.02224	0.02145	0.03322	0.02364	0.0081	0.03096	0.02503	0.03003
0.10377	0.14748	0.05879	0.02803	0.01118	0.04392	0.01775	0.05628	0.01228	0.02304	0.0224	0.0218	0.03408	0.01997	0.00755	0.03341	0.02356	0.03016
0.12459	0.1695	0.04885	0.03577	0.01957	0.04974	0.02101	0.04934	0.01542	0.02956	0.02806	0.02722	0.03775	0.0268	0.00772	0.02432	0.03173	0.03512
0.12639	0.17119	0.04809	0.03432	0.01824	0.0477	0.0198	0.04852	0.01394	0.02807	0.02626	0.0254	0.0358	0.02592	0.0075	0.02289	0.03032	0.03326
0.13466	0.17879	0.04176	0.03584	0.02018	0.04661	0.01762	0.04217	0.01297	0.02951	0.02625	0.02528	0.03348	0.0242	0.00455	0.01721	0.03192	0.03188
0.12682	0.16573	0.02636	0.04128	0.03111	0.04644	0.01381	0.02732	0.01269	0.03159	0.02859	0.0278	0.03285	0.02421	0.00777	0.01007	0.03829	0.03185
0.1312	0.17567	0.04395	0.0359	0.01986	0.04772	0.01876	0.04413	0.01393	0.02974	0.02693	0.02599	0.03478	0.02455	0.00516	0.02026	0.03186	0.03292
0.13927	0.1816	0.03436	0.0385	0.02444	0.04567	0.01502	0.03437	0.01327	0.0317	0.02679	0.02574	0.03105	0.02121	0.00443	0.01635	0.02471	0.03024
0.14474	0.18976	0.04117	0.03267	0.01746	0.04314	0.01687	0.04131	0.01232	0.02819	0.02398	0.02301	0.0307	0.19734	0.00404	0.01792	0.02925	0.09726
0.13899	0.18323	0.04132	0.03351	0.0181	0.04363	0.0161	0.04153	0.01165	0.02782	0.02414	0.02317	0.04363	0.02249	0.00388	0.01713	0.02969	0.09436
0.13868	0.17742	0.02391	0.0384	0.02857	0.04166	0.01072	0.02446	0.01184	0.02978	0.02491	0.02399	0.04166	0.01871	0.00454	0.01729	0.0354	0.0267
0.07626	0.11991	0.06866	0.04964	0.03279	0.06904	0.03617	0.06991	0.03089	0.04066	0.04383	0.04327	0.05775	0.03718	0.0244	0.04813	0.04165	0.04916
0.08378	0.12859	0.0647	0.04763	0.02992	0.06703	0.03306	0.06585	0.02731	0.03825	0.04056	0.0398	0.05385	0.03501	0.01892	0.04469	0.04029	0.04682
0.09132	0.13937	0.08094	0.02304	0.02062	0.04556	0.0258	0.07906	0.02047	0.01898	0.02151	0.02122	0.03919	0.02521	0.01746	0.06315	0.02045	0.03081
0.13414	0.18214	0.05827	0.0236	0.01517	0.04179	0.02338	0.05828	0.01674	0.02213	0.02142	0.02098	0.03493	0.17429	0.00869	0.03852	0.02295	0.07127
0.13712	0.18437	0.05318	0.02607	0.01352	0.04233	0.02122	0.05314	0.01494	0.02375	0.02206	0.02143	0.03353	0.1808	0.00674	0.03184	0.02417	0.08072
0.14422	0.18914	0.04065	0.03366	0.01854	0.04404	0.0173	0.04056	0.01316	0.02935	0.02491	0.02394	0.03138	0.19725	0.00464	0.01798	0.03028	0.09718
0.13077	0.17247	0.03864	0.03388	0.01981	0.04113	0.01251	0.03858	0.01	0.02629	0.02264	0.02167	0.02771	0.01917	0.00476	0.01567	0.02967	0.02637
0.13711	0.17551	0.02114	0.03854	0.02953	0.04202	0.01035	0.02193	0.01068	0.02906	0.02457	0.02367	0.04202	0.02005	0.00422	0.01455	0.03591	0.02696
0.13656	0.17442	0.01895	0.04023	0.03201	0.04357	0.01098	0.01973	0.01154	0.03046	0.02629	0.02547	0.04357	0.02186	0.00491	0.01257	0.03797	0.02877
0.13667	0.17312	0.01492	0.04004	0.0335	0.04216	0.00984	0.01531	0.01215	0.03017	0.02601	0.02527	0.04216	0.02117	0.00518	0.01335	0.03828	0.0278
0.12351	0.1674	0.04884	0.03172	0.01565	0.04436	0.01745	0.04766	0.01305	0.02666	0.02469	0.02395	0.03333	0.02135	0.00655	0.02479	0.02749	0.03093
0.13263	0.17711	0.04268	0.03803	0.02206	0.04943	0.01953	0.04258	0.01562	0.03222	0.02876	0.02777	0.03565	0.02469	0.00557	0.02053	0.03401	0.03414
0.13291	0.17883	0.04725	0.03785	0.02239	0.05231	0.02409	0.04774	0.01874	0.03315	0.0307	0.0298	0.03998	0.02982	0.00762	0.02558	0.03464	0.08894
0.12408	0.16962	0.05084	0.0336	0.0172	0.0483	0.02063	0.05121	0.01452	0.02757	0.02614	0.02529	0.03642	0.0259	0.00706	0.02726	0.02956	0.03361
0.13727	0.18264	0.04639	0.03	0.0143	0.04236	0.01712	0.04637	0.01156	0.02534	0.02242	0.02155	0.03099	0.02293	0.00469	0.02227	0.02642	0.09095
0.1298	0.17707	0.05389	0.03124	0.01705	0.04836	0.02406	0.05434	0.01748	0.02746	0.02624	0.0255	0.03805	0.02863	0.00764	0.03329	0.02861	0.08409
0.13178	0.17757	0.05159	0.02657	0.01089	0.04043	0.01666	0.0511	0.01078	0.02205	0.02014	0.01937	0.03005	0.02156	0.00515	0.02823	0.02284	0.08577
0.13168	0.17739	0.04818	0.03308	0.01708	0.04695	0.02008	0.04836	0.01438	0.028	0.02574	0.02486	0.03507	0.02542	0.00567	0.02495	0.02942	0.08742
0.14083	0.18212	0.03039	0.04044	0.02752	0.04657	0.01461	0.0307	0.01349	0.03296	0.02793	0.02691	0.03165	0.02201	0.00361	0.0169	0.0369	0.03105
0.13783	0.17784	0.0273	0.04269	0.03104	0.04844	0.01482	0.02796	0.01413	0.03434	0.03012	0.02921	0.04844	0.0242	0.00393	0.01892	0.03955	0.03336
0.11305	0.15789	0.06362	0.0177	0.00838	0.0337	0.01312	0.05964	0.00976	0.01449	0.01351	0.013	0.02569	0.01481	0.00528	0.03898	0.01356	0.02168
[truncated: 342 more rows]
