# Supplementary material for: Critical Evaluation of Particle Size Distribution Models Using Soil Data Obtained with a Laser Diffraction Method
Source: PLoS One. 2015 Apr 30;10(4):e0125048. doi: 10.1371/journal.pone.0125048 (PMC4416045; doi:10.1371/journal.pone.0125048)
Supplement: S2 Dataset — (XLS) [file pone.0125048.s002.xls]

## Sheet: AIC
Data for PM
JAKY1	LOGL2	LOGI2	LOGN2	VANH2	VANZ2	FRED3	LOGI3	MLOG3	ONLG3	ORLG3	SHCA3	VANZ3	ANDE4	FRED4	GOMP4	LOGI4	VANG4
-17.591	-9.283	-19.451	-30.086	-38.389	-44.961	-39.133	-19.829	-35.738	-28.587	-35.111	-35.106	-20.513	-15.691	-37.137	-20.977	-37.981	-41.997
-15.645	-8.024	-20.95	-29.917	-39.998	-45.604	-40.153	-21.802	-36.364	-28.339	-36.097	-36.094	-44.34	-43.544	-38.156	-22.045	-39.309	-42.272
-25.049	-13.844	-14.919	-36.461	-29.521	-37.529	-37.561	-16.152	-32.237	-34.848	-35.566	-35.563	-36.631	-21.09	-35.563	-16.11	-35.846	-41.026
-15.174	-8.088	-24.318	-23.625	-30.217	-48.318	-36.761	-24.521	-31.549	-23.083	-33.521	-33.517	-21.289	-46.686	-34.765	-31.508	-40.374	-46.329
-16.01	-8.558	-21.888	-25.013	-31.491	-39.548	-32.909	-23.05	-29.512	-23.291	-30.118	-30.114	-20.092	-60.931	-30.912	-26.611	-34.974	-37.744
-13.993	-7.431	-25.683	-24.121	-28.105	-40.325	-32.903	-26.481	-29.144	-22.464	-30.701	-30.698	-38.165	-58.152	-30.906	-31.988	-36.304	-39.125
-16.613	-9.198	-20.575	-25.345	-30.283	-37.656	-30.66	-21.741	-27.791	-23.497	-27.902	-27.899	-23.154	-49.855	-28.662	-25.582	-31.962	-35.193
-15.2	-8.523	-21.78	-33.067	-34.775	-33.456	-36.365	-22.045	-34.108	-34.141	-38.884	-38.879	-31.189	-29.709	-34.365	-21.507	-36.202	-32.766
-12.746	-6.817	-25.694	-31.216	-35.76	-29.714	-44.238	-25.666	-43.782	-33.73	-35.47	-35.494	-24.146	-32.633	-42.237	-27.272	-35.01	-28.975
-10.984	-5.674	-31.647	-27.887	-32.882	-34.177	-42.051	-29.724	-44.102	-30.604	-36.153	-36.205	-24.963	-32.373	-40.058	-31.341	-37.529	-34.215
-19.615	-10.395	-18.567	-30.265	-52.906	-35.465	-41.192	-17.629	-54.147	-32.636	-51.518	-51.541	-33.385	-31.367	-41.846	-19.448	-41.608	-35.153
-24.061	-13.415	-16.854	-22.024	-26.511	-21.67	-24.037	-15.102	-26.494	-23.875	-23.753	-23.76	-19.455	-21.027	-23.952	-14.997	-22.272	-19.909
-25.198	-14.705	-19.372	-21.173	-25.714	-20.493	-25.669	-17.705	-27.452	-23.215	-22.614	-22.624	-19.122	-21.982	-23.661	-20.242	-21.585	-19.384
-24.846	-14.787	-16.256	-20.53	-24.457	-19.625	-21.521	-14.071	-23.215	-21.886	-21.065	-21.07	-17.576	-19.405	-20.907	-14.5	-19.743	-17.918
-19.649	-10.527	-15.048	-37.832	-27.24	-32.813	-36.92	-16.576	-28.915	-35.832	-35.832	-35.832	-34.749	-19.534	-35.272	-14.282	-34.933	-39.802
-23.169	-12.795	-13.419	-33.699	-24.38	-30.005	-32.493	-14.576	-26.336	-31.699	-31.699	-31.699	-30.678	-24.143	-30.841	-12.594	-29.751	-37.39
-17.716	-9.212	-17.322	-40.065	-30.585	-33.733	-37.08	-18.974	-32.218	-38.065	-38.065	-38.065	-28.748	-29.238	-35.288	-16.786	-34.419	-37.816
-27.177	-14.302	-15.532	-25.365	-29.105	-23.733	-24.847	-14.489	-26.867	-26.661	-26.053	-26.058	-21.518	-22.867	-24.258	-12.586	-24.268	-22.315
-26.959	-14.728	-17.485	-24.342	-33.763	-24.445	-29.679	-16.906	-33.112	-27.401	-28.546	-28.557	-22.388	-26.305	-31.008	-17.457	-27	-23.365
-17.288	-9.367	-22.022	-24.965	-34.686	-51.349	-42.725	-21.884	-34.882	-25.843	-37.967	-37.958	-21.248	-39.179	-40.735	-26.189	-45.22	-56.207
-16.756	-9.504	-24.78	-23.717	-27.886	-24.493	-41.026	-24.003	-40.095	-25.06	-27.335	-27.355	-18.482	-29.604	-49.357	-37.446	-26.538	-22.854
-12.314	-6.532	-31.405	-24.653	-28.19	-25.659	-49.396	-30.066	-59.68	-26.058	-28.05	-22.653	-19.822	-31.636	-47.381	-37.103	-27.924	-25.002
-11.133	-5.743	-29.713	-28.6	-33.708	-32.973	-43.348	-28.504	-42.656	-30.962	-35.568	-35.614	-24.703	-34.844	-41.358	-28.579	-37.098	-33.036
-11.293	-5.852	-30.614	-27.314	-32.192	-30.578	-46.392	-29.322	-47.854	-29.308	-32.936	-32.976	-23.389	-34.858	-44.403	-30.864	-33.89	-30.571
-14.693	-7.662	-19.673	-30.899	-33.404	-37.677	-33.594	-22.782	-30.444	-28.899	-30.435	-30.434	-25.046	-46.466	-31.595	-22.197	-34.119	-35.839
-16.713	-8.712	-18.264	-40.292	-37.963	-45.339	-47.848	-19.665	-38.53	-38.123	-41.633	-41.63	-24.065	-20.571	-45.851	-18.245	-45.673	-51.199
-17.011	-9.227	-22.168	-26.869	-37.308	-35.437	-45.91	-21.299	-47.749	-29.91	-57.884	-57.914	-33.218	-30.345	-47.73	-25.901	-44.072	-34.952
-20.007	-11.643	-18.294	-29.127	-36.38	-39.158	-42.742	-20.633	-35.17	-29.917	-38.695	-38.684	-25.784	-43.539	-40.753	-20.726	-43.77	-38.994
-18.599	-10.229	-21.167	-26.419	-38.807	-37.654	-54.864	-21.079	-42.423	-28.417	-47.62	-47.604	-35.448	-32.887	-52.841	-24.777	-46.963	-11.683
-18.325	-10.234	-20.511	-26.201	-33.843	-52.946	-37.357	-21.302	-31.783	-26.014	-33.401	-33.395	-22.944	-49.861	-35.364	-24.444	-39.004	-51.697
-28.556	-21.513	-14.944	-23.022	-27.861	-20.67	-23.021	-13.582	-25.047	-25.421	-23.302	-23.309	-18.554	-23.665	-23.084	-12.863	-23.527	-21.653
-14.529	-8.704	-34.997	-19.327	-21.312	-19.872	-39.037	-33.275	-33.122	-21.403	-22.055	-22.077	-15.81	-23.782	-37.017	-39.278	-20.864	-19.371
-16.364	-10.595	-32.23	-17.247	-19.626	-18.769	-37.332	-30.15	-29.965	-19.141	-21.2	-21.234	-14.438	-26.519	-35.313	-33.094	-20.058	-19.267
-17.674	-11.046	-31.327	-18.65	-21.69	-20.017	-38.065	-29.363	-32.899	-20.594	-22.141	-22.167	-15.449	-25.318	-36.042	-36.014	-20.993	-19.298
-15.006	-9.695	-39.276	-20.958	-23.703	-22.922	-49.122	-37.385	-39.757	-23.477	-25.659	-25.692	-18.369	-34.456	-47.099	-38.011	-24.782	-23.807
-16.013	-9.989	-33.566	-21.82	-24.689	-21.997	-42.001	-32.071	-37.343	-23.718	-24.687	-24.711	-18.234	-28.53	-46.187	-32.4	-23.599	-21.676
-18.633	-11.103	-26.91	-19.715	-23.044	-20.042	-31.796	-25.102	-31.157	-20.849	-21.983	-22.005	-19.995	-22.579	-29.782	-34.293	-20.854	-18.886
-31.206	-15.647	-15.064	-29.243	-37.5	-28.505	-31.879	-15.145	-36.158	-34.322	-34.99	-35	-26.286	-30.043	-31.8	-14.499	-33.365	-29.347
-26.987	-14.834	-17.726	-25.266	-39.033	-27.885	-38.386	-17.139	-51.879	-31.069	-36.312	-36.335	-25.959	-33.149	-36.37	-18.728	-35.159	-28.279
-23.675	-13.446	-17.124	-27.413	-37.777	-32.987	-40.398	-17.19	-39.133	-31.705	-46.876	-46.872	-30.941	-35.987	-38.397	-18.157	-42.343	-34.858
-23.702	-24.632	-12.627	-30.284	-26.727	-29.199	-29.07	-13.315	-27.144	-29.519	-29.681	-29.678	-27.019	-26.237	-27.071	-12.17	-27.217	-31.149
-14.435	-7.998	-26.926	-25.475	-28.653	-25.277	-31.026	-24.433	-36.7	-27.795	-27.78	-27.802	-20.612	-23.848	-29.025	-42.726	-27.035	-24.362
-12.205	-6.495	-30.131	-26.018	-30.827	-28.564	-41.948	-28.032	-52.301	-28.161	-24.018	-30.657	-22.165	-30.561	-39.946	-37.222	-31.126	-28.243
-13.131	-7.106	-30.107	-28.17	-30.264	-28.46	-51.266	-30.004	-46.603	-30.561	-34.43	-34.454	-21.961	-30.053	-49.266	-28.158	-32.605	-27.165
-25.106	-14.071	-17.349	-27.075	-42.609	-30.889	-45.321	-17.341	-53.63	-32.408	-45.19	-45.228	-28.923	-38.095	-43.301	-18.793	-43.483	-32.054
-25.581	-13.826	-14.069	-43.478	-27.468	-32.901	-36.15	-14.844	-31.027	-41.742	-41.478	-41.478	-32.72	-26.774	-34.952	-13.59	-39.001	-44.524
-23.1	-14.286	-22.691	-20.888	-24.353	-19.781	-27.839	-20.682	-28.348	-18.888	-21.195	-21.209	-18.966	-22.789	-25.83	-29.019	-20.288	-18.293
-19.306	-12.59	-29.493	-18.963	-22.045	-19.49	-34.987	-27.072	-30.847	-20.048	-21.149	-21.171	-15.522	-26.508	-37.93	-35.598	-20.231	-18.728
-20.573	-11.693	-20.975	-24.356	-28.78	-24.387	-29.949	-20.55	-31.133	-23.135	-26.085	-26.097	-23.186	-23.359	-27.945	-31.724	-24.256	-21.272
-15.501	-8.581	-24.927	-25.617	-29.744	-25.923	-40.97	-23.31	-53.628	-27.642	-29.661	-29.684	-19.901	-29.243	-38.959	-41.174	-29.106	-24.664
-32.7	-17.978	-12.952	-34.785	-30.014	-32.83	-34.003	-14.799	-32.788	-36.377	-36.145	-36.141	-30.766	-20.692	-32.108	-14.213	-36.049	-41.546
-22.625	-13.134	-15.376	-28.122	-29.583	-38.49	-31.733	-18.1	-28.815	-26.591	-29.342	-29.338	-36.794	-37.066	-29.737	-18.207	-30.162	-35.407
-18.258	-10.445	-18.353	-26.919	-29.489	-37.223	-30.349	-19.747	-27.32	-24.967	-27.231	-27.229	-25.04	-42.981	-28.351	-22.588	-30.454	-34.085
-12.969	-6.82	-28.276	-31.205	-32.963	-45.682	-45.633	-27.158	-36.082	-29.91	-41.645	-41.637	-28.975	-32.662	-43.642	-26.51	-48.624	-46.382
-12.419	-6.588	-31.478	-31.474	-31.884	-44.566	-43.473	-30.719	-34.634	-30.114	-42.75	-42.738	-28.789	-32.352	-41.484	-22.786	-50.582	-45.179
-14.801	-8.138	-24.791	-30.775	-35.513	-45.338	-48.363	-24.705	-36.078	-29.927	-41.295	-41.286	-28.799	-34.026	-46.379	-28.65	-56.909	-43.867
-14.434	-7.571	-20.608	-27.472	-32.307	-35.614	-31.236	-23.179	-29.148	-25.414	-28.568	-28.567	-24.79	-2.104	-29.237	-25.006	-32.698	-34.14
-16.649	-9.334	-21.064	-28.004	-33.314	-48.818	-35.91	-21.766	-30.96	-26.451	-31.661	-31.657	-26.76	-47.469	-33.914	-26.195	-37.62	-45.376
-13.894	-7.494	-27.614	-28.914	-31.281	-50.451	-43.034	-27.345	-33.827	-27.723	-39.978	-39.968	-26.869	-34.506	-41.045	-27.273	-52.521	-51.613
-11.08	-5.679	-31.309	-33.233	-36.659	-33.74	-44.735	-32.325	-38.558	-35.726	-40.913	-40.952	-26.398	-38.11	-42.747	-30.068	-40.257	-33.22
-23.599	-12.845	-15.566	-38.806	-31.048	-39.485	-41.186	-16.554	-34.474	-37.247	-38.464	-38.46	-39.474	-21.404	-38.672	-16.408	-39.883	-47.371
-20.234	-11.001	-18.562	-29.52	-40.093	-48.381	-44.849	-18.898	-38.059	-29.631	-38.107	-38.098	-47.789	-46.826	-42.858	-20.774	-44.543	-68.019
-22.09	-12.1	-16.019	-36.017	-30.648	-39.952	-38.483	-17.237	-32.744	-34.073	-34.959	-34.956	-40.438	-20.555	-36.487	-17.116	-36.306	-41.256
-18.716	-10.134	-14.762	-32.209	-25.477	-30.954	-32.353	-16.679	-26.007	-30.209	-30.209	-30.209	-31.668	-19.062	-30.401	-14.496	-29.338	-32.285
-30.884	-16.28	-14.618	-31.738	-39.537	-32.499	-38.642	-15.689	-44.153	-38.844	-46.564	-46.572	-30.299	-41.86	-37.944	-14.472	-49.856	-39.247
-21.296	-11.486	-14.587	-38.584	-26.854	-32.528	-36.358	-15.666	-29.037	-36.584	-36.584	-36.584	-33.834	-21.511	-34.797	-13.57	-34.994	-40.491
-23.36	-12.588	-16.297	-36.336	-31.818	-40.034	-39.339	-17.562	-34.847	-34.611	-36.1	-36.096	-40.481	-21.194	-37.343	-17.093	-37.369	-42.757
-19.007	-10.524	-17.651	-28.742	-29.948	-36.508	-31.269	-19.179	-28.594	-26.632	-28.475	-28.472	-21.907	-16.517	-29.271	-20.216	-30.46	-33.222
-16.135	-8.766	-18.996	-27.127	-29.914	-34.375	-29.704	-21.014	-27.411	-25.061	-27.07	-27.068	-32.433	-14.408	-27.705	-22.757	-30.154	-31.981
-16.347	-8.722	-18.739	-30.516	-32.241	-37.258	-32.952	-21.362	-29.913	-28.501	-29.872	-29.87	-23.406	-44.52	-30.954	-20.936	-33.105	-35.142
-19.703	-11.097	-19.852	-21.877	-25.469	-21.1	-26.107	-17.763	-28.767	-23.753	-23.384	-23.392	-19.295	-21.318	-26.385	-21.333	-22.128	-19.26
-20.428	-11.691	-23.637	-22.498	-26.714	-22.221	-32.199	-22.062	-35.648	-24.179	-24.609	-24.629	-21.799	-24.672	-30.188	-32.736	-23.935	-21.036
-14.151	-7.714	-27.371	-24.13	-28.118	-24.749	-37.076	-25.043	-43.359	-25.81	-27.025	-27.051	-19.269	-27.519	-35.068	-35.124	-26.847	-23.832
-15.868	-8.621	-23.813	-28.157	-34.275	-32.59	-40.426	-22.688	-43.658	-31.472	-44.292	-44.301	-30.409	-28.558	-40.44	-25.945	-38.77	-31.91
-21.011	-12.314	-15.871	-28.437	-27.25	-35.511	-30.14	-17.468	-26.434	-26.463	-27.399	-27.396	-33.787	-34.947	-28.142	-18.636	-28.259	-31.799
-19.315	-10.649	-18.128	-29.409	-33.273	-42.139	-35.245	-18.856	-31.939	-27.596	-31.653	-31.649	-40.77	-15.179	-33.249	-20.739	-34.122	-38.807
-27.397	-15.191	-18.175	-26.092	-32.063	-23.931	-29.332	-16.886	-33.26	-24.092	-28	-28.009	-22.428	-26.585	-27.326	-19.814	-26.948	-23.748
-19.424	-13.591	-29.969	-28.829	-34.447	-31.844	-46.927	-28.078	-44.413	-31.644	-34.128	-34.162	-27.011	-35.959	-44.927	-32.192	-35.679	-33.4
-26.942	-19.428	-34.848	-29.951	-35.61	-32.278	-50.045	-32.672	-61.414	-34.066	-35.417	-35.449	-27.58	-38.811	-2.802	-47.383	-37.77	-36.116
-19.591	-14.558	-38.824	-28.441	-33.008	-32.493	-63.383	-36.677	-57.419	-31.415	-34.369	-34.4	-27.409	-41.389	-61.387	-46.915	-34.961	-33.867
-15.917	-9.31	-20.503	-29.451	-30.341	-53.69	-33.327	-23.337	-28.253	-27.427	-31.627	-31.62	-29.124	-49.794	-31.332	-21.066	-35.535	-50.445
-11.103	-5.839	-30.928	-37.581	-37.032	-43.148	-39.948	-31.849	-33.492	-36.11	-44.856	-44.838	-32.366	-36.845	-37.955	-30.068	-49.238	-43.544
-12.709	-6.875	-30.412	-31.617	-31.694	-40.404	-41.784	-30.409	-33.693	-31.152	-45.497	-45.477	-28.034	-32.345	-39.795	-22.312	-49.524	-40.556
-12.095	-6.5	-30.361	-33.382	-33.956	-45.046	-39.564	-30.223	-32.615	-31.52	-38.954	-38.946	-31.335	-33.908	-37.571	-20.722	-44.271	-45.306
-18.902	-10.311	-17.075	-32.839	-30.92	-39.236	-35.081	-18.757	-30.677	-30.839	-31.598	-31.596	-38.817	-17.756	-33.084	-18.627	-33.745	-36.869
-23.247	-12.657	-17.086	-30.836	-38.594	-41.722	-45.148	-17.708	-40.469	-32.378	-40.815	-40.803	-40.071	-46.422	-43.155	-18.592	-44.879	-55.943
-28.491	-16.145	-18.114	-22.786	-32.872	-25.04	-32.717	-17.727	-35.222	-27.18	-29.385	-29.401	-23.209	-29.468	-35.575	-18.541	-28.485	-24.509
-34.714	-18.381	-13.586	-33.941	-31.789	-32.786	-35.408	-15.423	-35.911	-37.68	-38.15	-38.149	-30.712	-21.473	-34.015	-14.776	-38.739	-45.744
-18.538	-9.966	-17.621	-34.237	-34.262	-43.728	-39.249	-18.756	-34.11	-32.108	-34.52	-34.517	-22.758	-17.35	-37.252	-18.892	-37.954	-42.767
-19.793	-11.04	-15.582	-33.195	-27.112	-36.086	-33.908	-17.643	-27.631	-31.195	-31.195	-31.195	-25.485	-19.431	-31.909	-16.942	-31.619	-34.162
-20.574	-11.209	-16.641	-36.894	-35.721	-42.927	-47.889	-16.804	-38.026	-36.329	-41.988	-41.981	-42.306	-17.786	-44.911	-17.918	-46.968	-56.034
-17.568	-9.494	-20.664	-27.334	-41.378	-45.211	-53.73	-20.156	-40.655	-28.747	-43.565	-43.553	-22.99	-36.235	-51.746	-24.373	-57.119	-47.813
-16.367	-8.776	-21.707	-27.287	-39.596	-41.388	-52.02	-20.732	-42.857	-29.469	-47.93	-47.914	-24.58	-33.033	-50.016	-26.456	-52.146	-41.981
-11.443	-6.059	-39.292	-24.594	-28.519	-30.052	-43.885	-36.791	-55.114	-27.426	-31.805	-22.594	-22.491	-29.113	-41.882	-52.041	-31.438	-29.883
-15.219	-8.444	-24.58	-25.421	-29.042	-24.24	-36.253	-23.486	-43.006	-27.257	-28.007	-23.421	-19.388	-26.192	-34.24	-36.094	-26.733	-22.645
-15.012	-8.089	-24.987	-28.215	-34.324	-38.711	-65.232	-24.073	-42.593	-29.804	-58.03	-57.991	-36.499	-30.59	-70.267	-31.043	-49.657	-9.203
-10.912	-5.56	-33.498	-28.192	-32.258	-29.698	-52.249	-33.898	-47.262	-29.774	-26.192	-32.666	-23.289	-36.67	-50.276	-27.243	-32.703	-29.253
-10.712	-5.43	-35.733	-26.184	-30.101	-28.332	-57.754	-35.603	-57.525	-27.495	-30.528	-30.563	-22.097	-35.842	-55.79	-30.454	-30.444	-28.032
-9.733	-4.764	-40.588	-25.872	-29.719	-32.619	-47.569	-39.309	-52.702	-27.862	-34.431	-23.872	-23.774	-39.792	-45.586	-33.364	-34.393	-32.968
-10.113	-5.038	-39.949	-24.949	-28.851	-30.366	-52.137	-38.415	-66.548	-26.726	-32.215	-32.263	-22.619	-37.555	-50.162	-36.327	-32.085	-30.7
-20.211	-11.004	-19.759	-27	-44.79	-36.023	-49.749	-19.547	-51.371	-29.535	-57.825	-57.825	-33.834	-32.898	-57.791	-21.902	-46.641	-35.971
-15.981	-8.54	-24.912	-24.64	-31.269	-32.224	-41.825	-23.532	-53.266	-27.942	-44.105	-44.124	-30.032	-27.348	-39.811	-29.549	-37.222	-9.588
-17.225	-9.514	-22.64	-26.611	-35.391	-38.025	-60.059	-22.434	-40.414	-29.037	-54.382	-54.337	-35.838	-32.914	-58.092	-25.343	-54.817	-37.809
-14.411	-7.755	-27.223	-28.477	-31.542	-34.818	-47.632	-26.084	-41.838	-30.807	-52.681	-52.692	-32.675	-28.938	-45.62	-28.956	-42.623	-34.06
-20.651	-11.005	-17.858	-33.431	-41.474	-44.881	-50.902	-18.034	-43.659	-33.501	-42.357	-42.348	-44.844	-17.907	-48.91	-18.722	-49.274	-51.542
-18.032	-9.345	-17.319	-45.709	-33.315	-35.826	-38.663	-18.295	-36.186	-45.213	-43.679	-43.679	-36.258	-17.409	-37.088	-15.935	-40.895	-38.753
-19.488	-10.578	-15.874	-37.775	-28.03	-35.432	-42.39	-18.599	-29.546	-35.775	-35.775	-35.775	-41.524	-19.287	-40.494	-16.308	-38.984	-45.99
-24.152	-13.083	-15.39	-41.8	-31.598	-38.691	-42.481	-16.189	-35.819	-41.352	-42.798	-42.794	-38.326	-21.887	-40.762	-16.007	-45.704	-63.179
-16.473	-9.187	-22.641	-26.359	-31.938	-57.2	-36.461	-23.37	-30.618	-25.62	-33.263	-33.256	-24.654	-44.729	-34.468	-26.064	-39.502	-54.17
-15.639	-8.792	-24.428	-28.81	-32.124	-35.291	-54.546	-25.689	-37.84	-30.073	-53.392	-53.38	-24.971	-32.813	-52.598	-26.161	-46.223	-33.954
-23.376	-12.439	-16.78	-33.638	-40.962	-37.661	-45.029	-16.863	-51.139	-36.681	-54.754	-54.739	-35.87	-18.081	-45.269	-17.398	-53.803	-42.293
-18.77	-9.826	-18.233	-35.708	-41.232	-43.938	-48.086	-18.432	-44.366	-35.564	-43.777	-43.769	-44.032	-17.459	-46.087	-18.15	-47.085	-48.856
-18.147	-9.76	-17.993	-32.235	-33.545	-41.176	-36.115	-19.455	-32.28	-30.075	-32.296	-32.293	-22.443	-16.8	-34.118	-19.583	-35.272	-38.743
-19.042	-10.663	-14.682	-30.611	-24.154	-31.43	-36.695	-18.346	-24.653	-28.611	-28.611	-28.611	-33.066	-18.992	-34.779	-16.117	-30.343	-37.652
-25.847	-13.617	-15.81	-39.634	-32.632	-38.495	-41.685	-16.836	-38.97	-39.759	-41.965	-41.959	-38.269	-22.865	-40.054	-16.138	-43.9	-54.352
-21.637	-11.819	-18.662	-27.654	-35.677	-46.47	-37.671	-19.696	-33.304	-27.308	-33.945	-33.937	-45.645	-95.712	-35.678	-20.86	-37.594	-46.064
-19.232	-10.363	-19.161	-28.977	-35.687	-44.5	-36.55	-20.087	-32.93	-27.322	-32.706	-32.702	-19.681	-16.154	-34.555	-21.248	-36.638	-41.693
-18.421	-10.042	-19.952	-26.601	-32.991	-41.619	-33.615	-21.015	-30.18	-24.933	-30.485	-30.481	-39.923	-56.626	-31.619	-23.155	-34.408	-38.575
-20.978	-11.788	-16.716	-28.692	-28.466	-35.011	-30.281	-18.466	-27.858	-26.632	-27.969	-27.967	-21.202	-17.442	-28.283	-18.941	-28.851	-31.508
-18.509	-9.96	-19.008	-29.638	-37.791	-47.678	-39.702	-19.316	-35.405	-28.377	-34.923	-34.917	-47.184	-15.357	-37.707	-21.272	-39.062	-45.611
-26.118	-14.217	-16.411	-28.908	-44.529	-32.608	-40.452	-17.466	-42.676	-32.064	-41.87	-41.879	-30.437	-35.264	-41.126	-17.89	-39.468	-33.407
-13.112	-7.057	-31.94	-20.536	-23.489	-22.01	-39.172	-29.847	-35.918	-21.677	-23.606	-23.637	-16.412	-27.341	-44.24	-42.548	-23.154	-21.373
-11.242	-5.892	-39.571	-23.406	-27.118	-27.993	-47.084	-37.012	-47.457	-25.641	-29.903	-29.947	-21.17	-30.551	-45.081	-79.383	-29.386	-28.122
-10.469	-5.371	-45.127	-25.198	-28.712	-32	-48.219	-42.702	-66.045	-23.198	-33.998	-34.051	-23.365	-31.648	-46.229	-47.571	-33.542	-32.222
-10.114	-5.131	-40.244	-27.083	-31.054	-32.052	-49.73	-37.892	-64.508	-29.137	-25.083	-34.111	-25.36	-32.471	-47.73	-44.873	-33.726	-32.38
-21.069	-11.323	-19.824	-25.847	-40.41	-32.393	-39.252	-19.341	-46.614	-28.121	-41.319	-41.332	-18.665	-29.431	-37.24	-21.138	-36.118	-31.001
-19.969	-10.971	-21.608	-23.609	-33.939	-32.469	-46.881	-21.686	-46.542	-26.506	-43.573	-43.596	-30.306	-30.395	-54.719	-23.629	-38.085	-31.101
-13.222	-7.169	-30.009	-31.239	-31.784	-33.756	-50.761	-29.663	-39.233	-32.964	-51.471	-51.509	-25.63	-29.733	-48.771	-30.056	-41.682	-32.783
-10.255	-5.147	-39.446	-24.928	-28.891	-30.374	-51.645	-37.684	-69.517	-26.777	-32.227	-32.275	-22.626	-36.467	-49.666	-37.623	-32.196	-30.749
-10.39	-5.28	-40.246	-25.7	-29.646	-32.444	-47.014	-38.074	-61.006	-28.12	-34.342	-23.7	-23.701	-33.227	-45.026	-39.658	-34.434	-32.77
-23.287	-13.029	-15.572	-32.64	-29.214	-37.851	-34.22	-17.064	-30.142	-30.718	-31.598	-31.595	-37.132	-19.564	-32.223	-17.248	-32.097	-35.982
-18.596	-10.269	-19.36	-27.351	-33.734	-44.547	-34.997	-20.133	-31.248	-25.944	-31.34	-31.335	-21.597	-56.845	-33.001	-22.82	-35.184	-41.069
-18.914	-10.337	-17.724	-30.349	-31.303	-38.127	-33.07	-19.348	-29.984	-28.264	-29.946	-29.943	-21.952	-17.11	-31.072	-19.774	-32.345	-35.252
-23.724	-12.585	-16.133	-40.856	-32.53	-39.258	-42.831	-17.083	-37.912	-39.816	-41.651	-41.646	-39.953	-21.978	-40.6	-16.261	-43.05	-49.181
-18.441	-9.741	-17.109	-48.786	-34.444	-41.316	-52.26	-18.412	-37.457	-46.841	-47.916	-47.913	-46.7	-47.369	-50.259	-16.684	-55.633	-67.816
-16.462	-8.795	-20.624	-26.832	-34.187	-41.877	-34.854	-20.984	-31.401	-25.324	-31.552	-31.548	-21.452	-44.495	-32.857	-24.207	-34.772	-38.057
-15.239	-7.826	-19.604	-43.895	-36.328	-42.843	-48.322	-22.303	-35.726	-41.895	-41.895	-41.895	-52.157	-15.073	-46.325	-20.114	-46.23	-50.538
-20.452	-11.065	-16.098	-43.355	-31.465	-39.998	-45.672	-17.24	-33.885	-41.355	-41.355	-41.355	-42.931	-23.242	-43.314	-16.332	-42.809	-51.107
-17.669	-9.408	-19.108	-30.47	-42.703	-48.216	-45.993	-18.78	-40.148	-30.191	-39.448	-39.442	-47.246	-14.944	-43.999	-21.24	-44.748	-51.556
-16.053	-8.59	-20.393	-27.805	-35.751	-45.054	-36.694	-20.814	-32.758	-26.173	-32.435	-32.432	-23.097	-56.477	-34.697	-24.854	-38.181	-42.834
-22.664	-12.9	-16.757	-28.316	-35.297	-42.547	-39.056	-18.892	-34.346	-28.913	-35.074	-35.066	-40.444	-50.384	-37.063	-19.276	-38.205	-46.278
-14.315	-7.719	-27.773	-28.647	-31.17	-34.155	-48.102	-26.658	-42.024	-30.83	-51.945	-51.967	-32.042	-28.733	-46.088	-28.603	-41.61	-33.274
-16.786	-9.125	-20.654	-27.026	-34.961	-48.521	-37.125	-20.921	-32.299	-25.846	-32.759	-32.755	-22.902	-51.825	-35.129	-25.389	-38.407	-45.387
-15.93	-8.578	-20.346	-26.717	-32.551	-38.56	-32.399	-21.338	-29.742	-24.775	-29.304	-29.301	-36.57	-49.055	-30.401	-24.871	-33.296	-36.032
-15.207	-8.263	-23.33	-28.314	-34.612	-63.648	-41.795	-23.114	-33.903	-27.314	-36.281	-36.275	-26.626	-38.696	-39.802	-29.507	-45.56	-85.268
-12.672	-6.793	-32.059	-31.898	-33.264	-30.125	-50.656	-30.824	-49.679	-34.319	-38.717	-38.734	-24.633	-27.795	-55.266	-26.24	-34.514	-28.562
-17.823	-9.84	-19.088	-29.688	-36.92	-51.246	-39.827	-19.345	-34.246	-28.477	-33.987	-33.982	-24.956	-47.787	-37.832	-23.138	-40.005	-48.588
-16.752	-9.195	-22.196	-25.414	-33.141	-56.541	-38.099	-22.577	-31.972	-25.172	-34.049	-34.042	-22.856	-43.963	-36.106	-27.52	-41.18	-53.35
-14.134	-7.577	-27.203	-28.489	-31.557	-39.221	-47.151	-26.181	-37.145	-29.671	-46.929	-46.912	-37.016	-30.933	-45.161	-28.039	-47.143	-39.3
-12.946	-6.806	-26.846	-29.639	-31.874	-45.738	-36.478	-26.063	-31.343	-27.592	-33.606	-33.603	-29.069	-36.25	-34.482	-30.068	-37.319	-41.231
-23.422	-12.801	-16.019	-35.49	-32.613	-41.047	-40.649	-16.972	-35.118	-34.128	-36.848	-36.843	-40.497	-19.335	-38.653	-17.317	-38.724	-47.058
-20.565	-11.22	-16.497	-35.833	-31.967	-41.911	-39.714	-17.484	-33.439	-33.827	-35.334	-35.331	-42.985	-19.244	-37.717	-17.681	-37.584	-43.154
-19.971	-10.985	-17.152	-31.815	-32.269	-41.496	-35.828	-18.195	-31.621	-29.74	-32.017	-32.013	-22.346	-17.458	-33.831	-19.156	-34.39	-38.878
-23.803	-19.884	-9.386	-26.002	-19.304	-25.054	-24.324	-12.159	-20.335	-24.002	-24.002	-24.002	-23.531	-27.998	-22.484	-11.066	-21.521	-27.991
-24.077	-13.532	-14.929	-35.485	-28.352	-37.35	-36.146	-16.357	-30.353	-33.485	-33.624	-33.622	-36.755	-21.236	-34.148	-16.342	-33.907	-38.183
-19.543	-10.413	-18.425	-30.419	-37.772	-41.143	-38.978	-18.411	-37.032	-30.332	-36.644	-36.639	-39.594	-16.269	-36.981	-19.498	-37.421	-39.761
-15.218	-8.39	-25.254	-27.804	-30.118	-28.58	-42.181	-25.129	-47.076	-30.959	-36.516	-36.536	-26.862	-28.142	-40.167	-26.582	-33.452	-27.301
-13.585	-7.429	-27.025	-31.389	-33.547	-29.481	-45.977	-26.953	-45.646	-34.357	-37.901	-37.921	-23.914	-29.753	-43.971	-27.201	-34.923	-28.288
-14.606	-8.087	-25.349	-31.017	-34.096	-39.871	-46.304	-25.461	-35.738	-31.468	-46.364	-46.342	-28.125	-33.089	-44.318	-25.283	-52.706	-39.928
-16.468	-9.268	-23.026	-28.502	-34.424	-39.942	-47.316	-23.964	-36.053	-28.88	-41.963	-41.953	-26.039	-34.515	-45.331	-25.999	-50.35	-38.199
-30.244	-16.057	-17.785	-25.43	-34.042	-23.516	-30.765	-16.669	-35.324	-29.111	-23.43	-28.088	-21.948	-29.116	-28.755	-18.625	-27.937	-23.814
-24.771	-13.623	-18.799	-26.289	-35.604	-25.414	-35.133	-17.905	-41.604	-29.36	-30.603	-24.289	-23.871	-30.49	-33.12	-21.319	-29.803	-24.757
-17.944	-9.775	-17.225	-32.24	-31.43	-39.557	-35.004	-18.526	-30.423	-30.206	-31.379	-31.377	-24.144	-17.964	-33.006	-19.179	-33.565	-36.705
-16.676	-9.39	-19.285	-25.473	-28.695	-34.126	-28.456	-20.805	-26.128	-23.442	-25.833	-25.831	-24.737	-12.599	-26.457	-24.154	-29.257	-31.72
-17.894	-10.423	-18.881	-26.273	-28.42	-37.153	-29.448	-20.619	-26.175	-24.291	-26.483	-26.481	-26.853	-42.842	-27.45	-22.391	-29.597	-33.885
-10.271	-5.184	-39.694	-25.786	-29.783	-32.551	-47.182	-37.63	-58.118	-28.095	-34.42	-34.474	-23.764	-34.265	-45.195	-38.012	-34.619	-32.94
-11.083	-6.009	-45.696	-28.197	-31.166	-31.279	-43.397	-43.325	-54.438	-31.715	-35.268	-35.3	-25.559	-27.249	-41.394	-65.336	-33.262	-30.691
-11.114	-5.888	-36.908	-27.446	-31.931	-31.544	-41.848	-34.482	-55.028	-25.446	-25.446	-34.061	-25.694	-28.451	-39.846	-45.345	-33.522	-31.307
-13.347	-7.734	-34.31	-22.854	-24.307	-21.734	-32.351	-32.691	-33.39	-24.531	-23.571	-23.579	-18.495	-21.951	-30.347	-49.777	-22.207	-20.162
-11.275	-6.711	-30.143	-19.555	-20.668	-23.07	-43.914	-29.698	-32.954	-23.166	-26.548	-17.555	-17.944	-27.754	-41.904	-43.237	-23.883	-23.979
-22.609	-13.723	-18.567	-31.246	-35.696	-33.448	-40.339	-20.589	-33.948	-30.277	-33.728	-33.739	-33.422	-51.154	-38.342	-22.876	-37.428	-31.968
-14.316	-7.905	-25.487	-25.752	-29.512	-24.211	-37.639	-24.212	-44.271	-27.251	-27.56	-27.575	-19.7	-27.287	-35.626	-44.449	-26.655	-22.787
-10.94	-5.733	-35.062	-27.883	-32.769	-32.48	-42.84	-32.709	-55.801	-30.606	-34.35	-34.392	-25.946	-29.634	-40.84	-40.412	-34.479	-32.258
-11.446	-6.256	-41.799	-28.493	-31.223	-30.427	-40.293	-39.445	-51.723	-31.825	-26.493	-34.485	-25.284	-26.321	-38.291	-53.846	-32.36	-29.673
-12.295	-7.166	-46.478	-25.072	-26.439	-24.916	-46.969	-46.847	-44.607	-28.152	-27.542	-27.558	-20.741	-27.411	-44.962	-60.552	-26.534	-24.522
-12.365	-7.201	-42.67	-25.295	-26.666	-24.509	-38.569	-41.663	-40.77	-27.767	-26.438	-26.446	-20.682	-25.638	-36.568	-49.817	-25.432	-23.293
-17.914	-9.615	-18.426	-31.693	-43.025	-37.515	-40.791	-17.535	-42.149	-34.006	-43.558	-43.554	-35.356	-32.833	-39.482	-20.319	-41.51	-37.668
-18.498	-9.966	-18.826	-30.365	-46.077	-41.715	-48.677	-18.268	-44.958	-32.034	-45.239	-45.228	-39.706	-36.112	-46.675	-21.024	-49.383	-43.838
-16.862	-9.142	-22.107	-26.347	-34.985	-34.283	-38.588	-21.123	-38.199	-29.845	-41.835	-41.838	-23.865	-29.808	-36.587	-23.814	-38.402	-33.788
-13.729	-7.287	-27.009	-30.83	-33.91	-36.781	-49.29	-25.627	-43.872	-32.473	-58.25	-58.264	-27.501	-29.058	-50.179	-30.598	-45.041	-36.084
-17.883	-10.22	-20.821	-26.461	-33.106	-47.056	-39.94	-22.855	-32.439	-27.217	-37.413	-37.401	-44.897	-42.357	-37.951	-23.302	-45.492	-48.773
-13.008	-7.057	-28.939	-31.954	-33.476	-30.551	-49.668	-28.956	-42.938	-34.817	-39.954	-39.977	-24.549	-30.406	-47.67	-25.619	-36.428	-29.388
-14.398	-7.787	-28.47	-28.268	-30.131	-29.419	-44.395	-27.168	-54.952	-30.818	-37.798	-37.815	-22.593	-26.604	-48.855	-29.029	-33.577	-27.854
-18.401	-11.026	-17.177	-24.981	-26.065	-33.822	-26.982	-20.351	-24.044	-22.987	-24.542	-24.54	-31.782	-35.379	-24.984	-20.316	-26.689	-30.409
-18.472	-10.116	-17.064	-32.096	-30.616	-38.689	-34.286	-18.725	-29.897	-30.096	-30.826	-30.824	-23.747	-17.344	-32.288	-18.93	-30.264	-36.1
-24.946	-13.551	-15.338	-39.867	-31.507	-38.189	-41.688	-16.255	-35.513	-39.237	-40.508	-40.505	-37.434	-21.668	-40.013	-16.124	-42.207	-49.193
-17.399	-9.388	-21.284	-25.914	-36.465	-51.195	-42.906	-21.067	-35.535	-26.439	-37.695	-37.686	-21.27	-39.939	-40.915	-21.773	-44.143	-54.593
-19.589	-10.24	-18.281	-33.72	-46.897	-41.646	-49.058	-17.952	-53.182	-35.21	-52.645	-52.629	-40.496	-17.729	-49.19	-18.18	-53.378	-45.214
-29.343	-15.338	-14.022	-36.946	-32.338	-32.56	-35.687	-14.977	-36.44	-43.722	-40.708	-40.71	-30.683	-21.616	-34.538	-14.59	-40.832	-37.542
-32.874	-16.867	-15.922	-27.1	-46.023	-28.449	-35.779	-15.6	-44.678	-34.389	-37.991	-38.01	-26.294	-34.458	-37.499	-15.612	-37.64	-30.586
-24.632	-17.093	-16.503	-19.961	-24.216	-18.254	-21.366	-14.738	-22.629	-21.202	-19.96	-19.967	-16.447	-19.954	-21.778	-14.872	-19.438	-17.952
-20.779	-11.256	-17.335	-33.888	-42.62	-39.779	-49.954	-17.185	-46.813	-35.273	-48.356	-48.344	-38.098	-37.338	-50.482	-18.723	-53.357	-42.372
-17.222	-9.085	-18.541	-33.283	-46.839	-47.93	-58.893	-18.097	-45.729	-33.216	-44.705	-44.697	-22.712	-15.831	-56.902	-19.937	-58.882	-55.06
-14.13	-7.614	-26.914	-28.789	-31.901	-48.163	-45.448	-26.474	-34.927	-28.051	-41.349	-41.338	-45.954	-33.931	-43.462	-31.157	-56.33	-48.818
-12.556	-6.652	-29.317	-27.44	-28.662	-43.256	-33.016	-29.914	-28.845	-24.925	-31.382	-31.378	-27.149	-42.969	-31.019	-22.913	-36.478	-40.507
-15.797	-8.365	-18.864	-32.84	-30.141	-35.923	-33.57	-22.912	-28.887	-30.84	-30.84	-30.84	-35.461	-15.367	-31.571	-20.832	-32.863	-34.325
-16.803	-8.751	-17.632	-38.901	-30.715	-35.276	-38.659	-19.817	-31.417	-36.901	-36.901	-36.901	-28.972	-16.303	-36.76	-17.613	-36.529	-38.379
-16.265	-8.564	-18.354	-36.929	-31.584	-38.385	-38.622	-21.615	-30.902	-34.929	-34.929	-34.929	-27.481	-16.095	-36.354	-19.46	-36.719	-38.757
-13.472	-7.056	-28.337	-28.571	-31.195	-38.535	-53.872	-26.789	-44.234	-29.778	-64.129	-64.127	-26.131	-29.34	-55.101	-36.132	-46.502	-37.759
-13.467	-7.209	-28.151	-32.59	-34.585	-30.41	-41.678	-26.71	-62.382	-35.136	-39.934	-39.946	-25.276	-26.31	-44.944	-29.709	-34.623	-28.806
-17.741	-9.544	-21.072	-26.601	-39.92	-35.969	-44.139	-20.126	-49.597	-29.392	-55.124	-55.142	-22.563	-30.828	-45.114	-24.038	-43.876	-35.739
-18.715	-10.076	-20.501	-26.779	-42.906	-36.345	-47.256	-19.77	-56.308	-29.076	-58.901	-58.937	-21.311	-31.363	-52.291	-23.12	-44.468	-35.724
-19.581	-10.382	-17.956	-33.725	-46.656	-41.3	-51.437	-17.532	-52.69	-34.721	-50.283	-50.27	-39.995	-17.31	-52.706	-18.6	-52.919	-43.222
-17.603	-9.645	-22.324	-24.561	-33.836	-50.992	-42.865	-22.59	-34.409	-25.423	-37.953	-37.943	-21.469	-38.518	-40.876	-27.085	-47.827	-50.831
-17.962	-9.739	-19.433	-27.552	-32.521	-38.453	-32.331	-20.847	-29.869	-25.425	-29.416	-29.413	-20.23	-15.406	-30.334	-22.247	-32.691	-35.604
-16.067	-8.613	-20.46	-26.434	-32.124	-37.408	-31.741	-21.808	-29.306	-24.41	-28.932	-28.93	-35.421	-45.604	-29.743	-24.438	-32.622	-34.926
-14.793	-8.001	-23.586	-23.949	-28.669	-37.595	-30.916	-24.775	-27.579	-22.258	-28.663	-28.66	-35.462	-10.398	-28.918	-29.913	-33.831	-36.385
-10.568	-5.296	-36.691	-30.405	-30.755	-48.579	-37.314	-36.614	-34.665	-27.98	-36.499	-36.497	-29.56	-38.697	-35.318	-36.198	-41.122	-45.096
-11.035	-5.776	-33.614	-32.571	-33.299	-51.738	-37.271	-33.694	-31.736	-30.216	-36.359	-36.353	-32.056	-35.802	-35.276	-32.746	-42.167	-49.478
-10.337	-5.309	-37.602	-33.614	-33.889	-54.504	-39.052	-38.125	-34.333	-31.277	-40.395	-40.387	-32.041	-35.128	-37.058	-36.198	-49.229	-55.553
-25.062	-16.402	-17.108	-19.502	-23.757	-18.487	-21.616	-15.245	-22.865	-20.917	-19.966	-19.974	-16.638	-19.415	-22.161	-15.592	-18.996	-17.256
-23.364	-12.739	-17.389	-22.33	-27.39	-22.761	-24.671	-15.618	-27.366	-24.583	-25.015	-25.022	-20.475	-21.567	-24.578	-14.96	-23.376	-21
-18.945	-9.649	-20.08	-28.286	-39.494	-34.535	-37.068	-18.568	-43.904	-30.167	-42.096	-42.107	-32.485	-16.406	-36.756	-18.528	-37.222	-33.695
-15.753	-7.925	-19.949	-39.559	-44.164	-40.09	-42.433	-20.351	-47.107	-41.927	-49.895	-49.9	-23.029	-15.273	-41.092	-18.129	-44.288	-41.082
-14.099	-6.931	-23.213	-31.804	-45.686	-51.216	-55.084	-23.671	-53.26	-31.65	-52.818	-52.811	-50.286	-17.189	-53.082	-22.082	-56.495	-53.173
-14.485	-7.167	-22.637	-30.302	-43.289	-49.022	-53.958	-22.695	-55.762	-30.51	-56.16	-56.15	-47.566	-37.45	-51.954	-21.701	-55.613	-50.28
-13.387	-7.173	-30.948	-29.039	-29.881	-35.737	-53.741	-29.919	-39.731	-30.271	-58.883	-58.91	-25.355	-29.167	-51.739	-26.651	-43.952	-34.822
-13.604	-7.085	-28.195	-26.477	-29.778	-43.02	-55.619	-26.727	-40.85	-27.324	-50.544	-50.526	-24.791	-31.324	-53.622	-36.16	-53.606	-8.333
-12.457	-6.439	-31.133	-29.215	-29.929	-50.403	-45.701	-30.021	-36.809	-27.74	-42.391	-42.383	-26.838	-33.454	-43.711	-26.293	-51.913	-51.432
-12.357	-6.322	-29.888	-28.934	-30.042	-54.001	-43.023	-28.772	-36.141	-27.101	-39.514	-39.51	-26.961	-0.382	-41.029	-27.833	-46.366	-51.959
-21.527	-13.066	-18.653	-17.783	-20.861	-17.102	-20.882	-16.298	-21.636	-18.618	-18.012	-18.02	-15.489	-17.278	-21.533	-17.726	-16.811	-15.042
-22.048	-12.738	-17.225	-18.896	-22.097	-18.231	-20.548	-14.911	-22.036	-20.019	-19.261	-19.267	-16.167	-17.612	-20.632	-15.519	-17.951	-16.074
-19.94	-10.216	-18.718	-29.927	-39.476	-33.218	-35.01	-17.477	-39.476	-32.469	-39.198	-39.204	-31.153	-17.486	-34.143	-17.397	-35.842	-32.682
-17.622	-9.046	-18.114	-34.9	-40.732	-35.826	-37.338	-17.293	-41.165	-37.665	-42.651	-42.655	-34.023	-16.791	-36.032	-16.728	-38.869	-35.803
-14.2	-6.958	-23.681	-30.077	-40.687	-46.079	-48.888	-23.537	-64.635	-30.475	-63.35	-63.369	-44.27	-13.334	-48.063	-21.957	-49.212	-45.473
-14.127	-6.913	-23.412	-31.387	-42.957	-45.345	-47.695	-23.375	-59.697	-31.923	-60.07	-60.084	-43.599	-13.434	-46.675	-21.553	-48.155	-44.717
-13.425	-6.502	-24.664	-29.537	-39.724	-50.995	-55.624	-24.74	-70.13	-29.539	-71.391	-71.37	-49.285	-12.672	-53.619	-23.571	-56.322	-51.116
-12.631	-6.496	-30.507	-29.087	-30.155	-41.292	-60.456	-28.725	-45.583	-29.153	-64.509	-64.464	-26.623	-29.985	-58.431	-29.805	-49.208	-40.455
-14.127	-7.489	-26.845	-28.268	-32.137	-37.218	-49.491	-25.473	-43.147	-30.275	-57.91	-57.911	-25.86	-29.32	-50.013	-32.191	-45.492	-8.46
-13.591	-7.336	-26.682	-30.493	-32.454	-42.536	-38.149	-25.978	-32.082	-29.08	-36.192	-36.186	-28.88	-33.599	-36.154	-24.504	-39.434	-42.323
-12.629	-6.511	-29.708	-29.103	-30.35	-51.039	-46.347	-28.471	-37.225	-27.706	-42.107	-42.1	-26.771	-33.877	-44.356	-28.378	-51.098	-51.865
-23.933	-13.118	-16.641	-22.492	-26.857	-22.282	-23.671	-14.848	-26.06	-24.256	-24.179	-24.185	-19.985	-21.016	-23.332	-14.005	-22.606	-20.492
-18.211	-9.261	-19.601	-31.381	-43.242	-36.579	-38.853	-18.56	-44.88	-33.351	-44.892	-44.901	-34.718	-16.536	-38.097	-17.681	-39.833	-36.306
-14.759	-7.401	-21.191	-30.104	-45.286	-47.502	-50.107	-20.961	-47.846	-30.415	-47.795	-47.788	-45.823	-15.458	-48.903	-21.58	-50.958	-48.21
-13.705	-6.742	-22.452	-29.845	-43.23	-51.713	-55.981	-22.532	-51.969	-29.917	-51.705	-51.699	-50.171	-37.893	-53.979	-22.887	-57.414	-53.215
-13.318	-6.739	-26.556	-24.312	-29.855	-52.77	-57.588	-24.924	-43.9	-25.305	-48.129	-48.121	-22.768	-1.43	-55.599	-40.111	-60.021	-53.842
-13.176	-6.67	-27.338	-24.374	-29.127	-53.953	-55.549	-25.725	-43.1	-25.107	-47.257	-47.25	-22.877	-1.343	-53.56	-41.058	-58.934	-55.169
-12.067	-6.36	-32.019	-30.991	-31.55	-49.16	-39.857	-31.436	-32.981	-29.018	-38.587	-38.58	-29.195	-34.056	-37.864	-21.576	-45.359	-49.191
-11.939	-6.163	-32.035	-31.334	-31.83	-50.745	-45.281	-30.984	-36.529	-29.469	-42.008	-42.001	-29.177	-33.289	-43.29	-23.58	-51.799	-51.829
-13.304	-6.41	-27.802	-28.988	-36.592	-60.712	-67	-28.113	-55.476	-28.299	-56.783	-56.777	-60.091	-42.345	-64.998	-26.16	-67.866	-63.484
-26.752	-16.034	-17.039	-21.074	-25.629	-19.34	-22.768	-15.33	-24.505	-22.266	-21.267	-21.274	-17.515	-20.771	-23.187	-16.233	-20.331	-18.182
-19.928	-11.935	-20.033	-17.109	-19.89	-17.141	-21.556	-17.679	-22.251	-18.285	-18.004	-18.015	-15.737	-17.266	-22.509	-19.822	-16.845	-15.05
-18.907	-9.666	-19.352	-30.067	-42.106	-35.454	-37.737	-18.149	-43.198	-32.132	-42.958	-42.965	-33.454	-16.752	-36.948	-18.056	-38.73	-35.155
-15.215	-7.651	-19.761	-34.2	-50.176	-42.058	-44.98	-19.607	-51.692	-35.69	-54.116	-54.121	-21.658	-17.521	-43.819	-18.813	-47.079	-42.663
-14.218	-7.092	-22.155	-27.624	-39.242	-47.106	-53.315	-21.257	-55.593	-28.41	-57.78	-57.767	-45.144	-35.023	-51.309	-23.912	-54.425	-47.442
-14.301	-7.441	-26.367	-24.203	-30.145	-42.16	-53.676	-24.757	-43.297	-26.312	-53.514	-53.493	-22.872	-31.339	-51.668	-36.105	-51.41	-42.02
-12.026	-6.424	-33.345	-33.975	-33.969	-34.506	-51.67	-33.252	-38.851	-35.248	-52.842	-52.888	-27.104	-30.646	-49.695	-32.746	-42.479	-33.442
-12.026	-6.294	-33.521	-31.716	-31.656	-43.178	-49.137	-32.545	-37.613	-30.618	-48.526	-48.508	-28.816	-31.156	-47.154	-22.826	-56.62	-43.046
-12.536	-6.488	-29.157	-31.416	-32.726	-46.668	-51.28	-27.77	-38.876	-30.141	-45.126	-45.118	-29.072	-32.221	-49.293	-28.058	-55.864	-47.262
-13.254	-6.457	-24.409	-26.625	-35.448	-51.114	-57.31	-23.935	-62.355	-27.019	-66.24	-66.223	-49.13	-36.725	-57.476	-26.023	-57.193	-50.966
-27.036	-16.685	-17.175	-20.947	-25.975	-19.527	-23.201	-15.581	-24.938	-22.657	-21.589	-21.597	-17.705	-21.329	-23.949	-16.111	-20.775	-18.601
-24.017	-13.058	-16.321	-23.022	-27.117	-22.256	-23.253	-14.505	-25.486	-24.44	-24.063	-24.067	-19.962	-20.893	-22.673	-13.723	-22.457	-20.46
-17.729	-9.002	-19.86	-33.986	-45.451	-38.903	-41.055	-19.481	-46.056	-35.849	-46.804	-46.81	-37.373	-33.998	-39.962	-17.707	-42.491	-39.369
-17.118	-8.757	-19.687	-29.667	-44.155	-37.516	-40.576	-18.356	-48.029	-31.506	-48.173	-48.181	-35.507	-15.397	-39.87	-19.312	-41.743	-37.281
-15.822	-8.057	-20.387	-28.564	-43.179	-39.209	-43.003	-18.884	-54.417	-30.289	-54.142	-54.153	-20.34	-31.611	-42.511	-21.134	-43.845	-38.775
-15.881	-8.147	-20.383	-27.935	-40.92	-36.59	-39.955	-18.51	-50.972	-30.104	-48.754	-48.766	-21.323	-29.716	-39.42	-21.983	-40.265	-35.663
-15.043	-7.64	-22.792	-25.035	-34.614	-40.871	-46.343	-20.97	-67.184	-26.525	-61.195	-61.222	-19.611	-31.544	-44.336	-25.829	-45.479	-40.066
-13.219	-7.04	-29.211	-31.213	-32.61	-37.753	-52.566	-28.048	-39.961	-32.038	-57.204	-57.175	-35.598	-29.682	-50.561	-32.732	-47.533	-37.177
-13.991	-7.431	-26.216	-28.618	-32.007	-43.869	-41.948	-25.224	-34.495	-28.113	-39.005	-38.998	-26.596	-33.379	-39.955	-30.011	-43.244	-43.73
-13.053	-6.415	-24.948	-25.218	-32.707	-50.575	-58.472	-23.785	-58.507	-26.259	-64.236	-64.22	-48.486	-35.633	-56.463	-30.959	-57.163	-50.256
-22.149	-12.554	-16.757	-20.972	-24.419	-19.868	-21.952	-14.682	-24.005	-22.287	-21.398	-21.403	-17.694	-19.117	-21.66	-15.253	-20.011	-17.865
-21.875	-12.389	-18.714	-20.087	-23.974	-20.462	-24.124	-16.539	-26.236	-22.053	-22.222	-22.231	-18.437	-20.125	-24.007	-17.774	-20.902	-18.503
-18.86	-9.788	-17.156	-34.804	-36.097	-33.42	-34.028	-16.369	-36.68	-37.412	-37.884	-37.887	-31.518	-17.997	-32.561	-15.879	-32.789	-32.994
-17.898	-9.247	-18.649	-30.384	-41.567	-34.001	-36.238	-17.129	-41.887	-32.951	-42.088	-42.094	-31.916	-29.454	-35.339	-18.366	-37.257	-33.383
-15.494	-7.913	-20.167	-29.832	-46.255	-43.27	-45.671	-19.236	-46.417	-30.927	-46.525	-46.519	-21.595	-14.079	-43.668	-20.604	-46.999	-43.588
-14.74	-7.667	-23.912	-24.944	-33.011	-45.942	-46.666	-22.622	-38.502	-26.246	-41.784	-41.777	-22.516	-34.576	-44.672	-30.715	-46.414	-45.944
-11.939	-6.163	-32.035	-31.334	-31.83	-50.745	-45.281	-30.984	-36.529	-29.469	-42.008	-42.001	-29.177	-33.289	-43.29	-23.58	-51.799	-51.829
-12.136	-6.249	-30.54	-31.269	-32.132	-51.187	-46.142	-29.34	-36.997	-29.44	-41.848	-41.842	-29.098	-33.566	-44.15	-25.609	-51.205	-52.142
-13.591	-7.083	-25.692	-28.508	-32.595	-47.782	-43.763	-24.466	-36.03	-27.738	-39.216	-39.21	-26.488	-34.778	-41.769	-32.098	-44.83	-47.675
-13.254	-6.422	-25.127	-27.368	-36.125	-53.679	-60.63	-25.025	-60.195	-27.345	-62.537	-62.525	-19.969	-38.287	-58.623	-25.282	-60.79	-54.045
-22.504	-12.553	-17.429	-20.806	-24.805	-20.39	-22.639	-15.036	-24.787	-22.419	-22.052	-22.058	-18.176	-19.568	-22.672	-15.401	-20.597	-18.382
-22.633	-12.183	-18.292	-22.798	-29.139	-24.186	-26.596	-16.623	-29.919	-25.741	-27.186	-27.193	-21.91	-22.854	-26.616	-16.351	-25.324	-22.55
-15.761	-7.965	-18.432	-39.036	-38.637	-36.55	-37.8	-18.431	-40.381	-41.861	-43.667	-43.671	-35.141	-15.653	-36.297	-16.537	-39.034	-36.374
-16.457	-8.766	-22.069	-26.636	-34.99	-30.16	-35.125	-20.435	-45.528	-30.214	-38.307	-38.317	-27.948	-25.859	-33.117	-26.071	-33.455	-28.723
-16.062	-8.262	-21.535	-25.943	-37.39	-37.324	-41.937	-19.673	-56.812	-27.885	-51.51	-51.527	-19.883	-30.043	-42.079	-23.728	-41.585	-36.481
-14.246	-7.087	-21.324	-29.558	-44.074	-45.391	-50.013	-20.702	-62.741	-30.468	-63.198	-63.186	-43.486	-13.173	-48.008	-21.952	-51.442	-45.508
-15.017	-7.826	-23.449	-25.157	-34.024	-43.795	-48.675	-22.039	-40.883	-26.953	-44.944	-44.935	-22.547	-33.292	-46.676	-29.76	-48.684	-44.272
-13.03	-6.979	-29.833	-28.862	-29.75	-45.672	-37.678	-29.308	-31.413	-27.359	-37.089	-37.081	-26.845	-34.236	-35.684	-23.352	-41.862	-45.584
-13.454	-6.932	-25.31	-28.41	-33.445	-47.517	-53.609	-23.671	-41.227	-28.58	-45.456	-45.449	-26.444	-33.367	-51.617	-36.175	-54.095	-48.352
-14.424	-7.878	-25.139	-30.804	-33.556	-38.739	-39.625	-24.352	-33.663	-30.601	-38.664	-38.656	-36.401	-32.012	-37.63	-24.716	-39.767	-38.394
-21.801	-12.613	-19.371	-20.093	-23.662	-19.175	-23.822	-17.139	-25.424	-21.353	-20.762	-20.771	-17.557	-19.862	-24.411	-19.945	-19.612	-17.271
-21.618	-11.928	-18.648	-21.479	-26.299	-21.861	-25.251	-16.623	-28.064	-23.741	-24.264	-24.271	-19.697	-21.244	-25.699	-17.362	-22.72	-19.985
-20.413	-10.721	-19.164	-24.903	-33.275	-27.569	-30.073	-17.649	-34.739	-27.49	-32.112	-32.12	-25.343	-24.874	-29.965	-18.632	-29.259	-26.062
-15.257	-8.116	-24.473	-25.976	-33.056	-37.895	-45.793	-23.2	-41.518	-28.896	-50.096	-50.081	-35.667	-30.395	-43.785	-29.772	-44.983	-37.796
-15.554	-8.547	-23.77	-29.805	-33.492	-28.579	-38.282	-23.111	-47.539	-33.136	-36.922	-36.936	-26.641	-27.142	-36.273	-24.904	-33.335	-27.305
-16.743	-8.745	-19.824	-28.014	-38.426	-31.677	-34.308	-17.849	-41.258	-31.074	-39.224	-39.231	-21.958	-26.72	-32.303	-21.652	-34.223	-30.299
-15.818	-8.367	-23.299	-25.002	-34.012	-38.774	-44.93	-21.99	-42.02	-27.832	-48.161	-48.149	-22.767	-31.146	-42.923	-28.354	-44.688	-38.853
-13.973	-7.402	-25.859	-28.525	-32.135	-44.48	-40.998	-24.866	-34.084	-27.796	-37.837	-37.831	-26.525	-33.999	-39.003	-28.882	-42.031	-44.318
-13.454	-6.932	-25.31	-28.41	-33.445	-47.517	-53.609	-23.671	-41.227	-28.58	-45.456	-45.449	-26.444	-33.367	-51.617	-36.175	-54.095	-48.352
-13.402	-6.479	-26.234	-28.694	-37.179	-55.826	-63.139	-26.396	-59.235	-28.313	-60.942	-60.932	-54.388	-12.501	-61.132	-24.956	-63.791	-56.942
-21.004	-12.141	-17.801	-19.287	-22.21	-18.095	-21.059	-15.451	-22.543	-20.144	-19.237	-19.243	-16.2	-17.829	-20.901	-17.117	-17.99	-15.975
-21.343	-11.728	-18.909	-21.706	-27.032	-22.47	-26.1	-17.035	-29.232	-24.284	-25.187	-25.195	-20.303	-21.82	-26.608	-17.749	-23.557	-20.641
-19.03	-9.786	-20.091	-27.185	-39.187	-34.282	-37.456	-18.638	-44.559	-29.179	-42.717	-42.727	-32.154	-29.694	-37.214	-19.575	-37.761	-33.642
-15.39	-7.68	-22.392	-29.466	-41.494	-45.275	-49.852	-21.998	-62.406	-30.073	-62.524	-62.534	-19.241	-16.663	-49.622	-20.946	-50.762	-45.571
-15.137	-7.705	-21.375	-27.38	-40.225	-43.311	-48.693	-19.974	-51.952	-28.78	-54.526	-54.514	-21.095	-33.434	-46.688	-23.759	-49.985	-43.617
-14.607	-7.458	-22.336	-26.46	-37.169	-45.741	-51.202	-20.844	-46.417	-27.8	-49.251	-49.242	-43.652	-34.056	-49.198	-27.058	-52.146	-46.417
-15.162	-8.015	-23.492	-26.236	-34.492	-41.293	-45.535	-22.243	-38.875	-28.248	-43.085	-43.076	-24.466	-32.431	-43.534	-29.33	-45.512	-41.459
-13.27	-6.933	-27.465	-28.738	-31.208	-48.26	-42.42	-26.384	-34.845	-27.485	-38.785	-38.779	-26.618	-34.57	-40.427	-28.374	-44.709	-48.171
-13.112	-6.573	-25.013	-26.145	-32.592	-54.856	-57.04	-23.567	-44.532	-26.8	-47.2	-47.195	-52.795	-1.289	-55.048	-34.544	-57.815	-56.094
-15.137	-7.705	-21.375	-27.38	-40.225	-43.311	-48.693	-19.974	-51.952	-28.78	-54.526	-54.514	-21.095	-33.434	-46.688	-23.759	-49.985	-43.617
-19.944	-11.6	-20.325	-18.098	-20.98	-17.741	-22.605	-17.974	-23.36	-19.251	-18.8	-18.81	-16.296	-18.101	-23.548	-20.314	-17.685	-15.674
-20.181	-11.716	-20.01	-18.438	-21.377	-18.05	-22.731	-17.653	-23.696	-19.668	-19.19	-19.2	-16.515	-18.331	-23.283	-20.176	-18.06	-15.991
-20.971	-10.993	-18.79	-25.464	-34.113	-28.042	-30.5	-17.417	-35.108	-28.267	-32.863	-32.871	-25.802	-25.56	-30.21	-18.161	-30.078	-26.755
-14.827	-7.413	-22.305	-27.402	-38.55	-45.625	-51.304	-21.422	-58.764	-28.118	-62.42	-62.403	-43.679	-34.746	-49.297	-22.758	-51.9	-45.727
-13.923	-6.828	-22.805	-35.109	-54.529	-48.945	-53.115	-23.439	-58.452	-35.238	-56.393	-56.386	-48.373	-38.783	-51.814	-21.461	-55.133	-51.166
-14.883	-7.618	-21.798	-26.886	-38.681	-42.714	-48.906	-20.153	-51.366	-28.647	-55.114	-55.102	-22.504	-32.667	-46.9	-25.853	-49.903	-42.836
-13.738	-7.238	-27.076	-28.646	-31.91	-42.786	-49.405	-25.826	-38.116	-28.925	-45.318	-45.306	-26.618	-31.729	-47.416	-32.683	-50.798	-43.21
-12.595	-6.387	-26.886	-28.527	-31.224	-51.92	-42.4	-25.73	-36.467	-26.887	-38.432	-38.429	-49.869	-38.634	-40.404	-36.197	-43.654	-47.724
-12.555	-6.279	-26.003	-28.56	-32.433	-57.695	-53.489	-24.459	-42.987	-27.895	-45.345	-45.341	-55.602	-36.762	-51.495	-41.059	-55.255	-58.063
-13.042	-6.249	-27.313	-32.909	-42.986	-56.389	-63.094	-27.71	-61.746	-32.355	-61.161	-61.152	-56.273	-41.93	-62.441	-25.438	-64.968	-59.134
-22.678	-12.632	-17.244	-21.323	-25.357	-20.908	-23.08	-15.035	-25.375	-23.004	-22.697	-22.703	-18.673	-20.016	-23.029	-15.268	-21.227	-18.97
-17.577	-8.984	-18.692	-36.433	-41.76	-37.648	-38.925	-18.485	-42.479	-38.796	-43.844	-43.848	-36.111	-16.795	-37.505	-16.987	-40.276	-37.918
-15.707	-8.122	-20.589	-28.174	-43.16	-39.809	-44.227	-19.009	-51.105	-30.364	-52.448	-52.447	-22.719	-31.875	-43.374	-23.387	-45.668	-39.89
-13.939	-6.854	-21.608	-36.283	-54.46	-45.836	-49.322	-22.137	-57.862	-37.127	-61.368	-61.373	-44.784	-18.375	-48.144	-20.322	-51.609	-47.011
-14.814	-7.673	-21.98	-27.368	-38.439	-44.351	-48.126	-20.538	-42.248	-28.777	-44.246	-44.239	-24.213	-33.918	-46.124	-27.415	-48.017	-44.692
-15.118	-7.901	-23.657	-24.983	-33.678	-42.208	-48.61	-22.201	-42.092	-27.144	-47.429	-47.417	-22.636	-32.355	-46.604	-30.141	-48.534	-42.603
-14.033	-7.676	-28.409	-28.647	-29.98	-32.083	-47.983	-28.433	-39.695	-31.222	-45.41	-45.444	-23.604	-29.602	-45.984	-26.24	-39.068	-31.05
-13.879	-7.567	-27.328	-31.018	-32.768	-36.624	-45.272	-26.66	-36.592	-32.485	-49.266	-49.247	-34.524	-30.801	-43.28	-25.155	-44.722	-36.419
-13.801	-7.126	-25.58	-26.14	-31.859	-46.77	-53.883	-23.985	-41.254	-27.149	-46.361	-46.351	-24.452	-33.238	-51.889	-36.115	-54.304	-47.497
-14.834	-7.345	-24.818	-31.371	-41.887	-52.517	-55.92	-25.339	-50.203	-30.973	-50.84	-50.832	-52.075	-41.105	-53.917	-22.997	-55.586	-54.268
-22.375	-12.452	-17.031	-21.94	-25.897	-21.17	-23.3	-14.963	-25.721	-23.616	-23.098	-23.104	-18.932	-20.271	-23.086	-15.309	-21.611	-19.277
-21.657	-11.282	-18.278	-25.508	-32.972	-27.15	-29.054	-16.851	-32.913	-28.113	-31.103	-31.11	-24.92	-24.821	-28.675	-16.313	-28.59	-25.713
-17.516	-8.913	-20.38	-27.93	-38.978	-35.452	-38.001	-18.718	-45.791	-29.645	-43.744	-43.755	-33.383	-29.75	-37.536	-19.288	-37.965	-34.39
-15.972	-8.347	-21.623	-26.465	-38.195	-36.235	-41.692	-19.877	-54.084	-29.156	-51.076	-51.088	-22.628	-29.437	-39.686	-25.548	-41.538	-11.991
-14.528	-7.211	-21.941	-29.821	-43.408	-46.732	-51.602	-21.672	-59.996	-30.377	-60.564	-60.552	-45.002	-13.543	-49.597	-21.461	-53.122	-47.273
-14.055	-7.248	-25.622	-24.395	-30.832	-48.224	-51.802	-24.121	-40.519	-25.718	-45.176	-45.167	-22.648	-34.118	-49.811	-35.5	-53.018	-49.091
-12.649	-6.711	-30.634	-31.516	-32.135	-43.19	-45.58	-29.738	-35.622	-30.453	-44.327	-44.314	-28.646	-31.808	-43.592	-24.305	-52.153	-43.578
-12.187	-6.463	-32.303	-31.387	-31.672	-46.043	-41.63	-31.685	-33.764	-29.787	-41.368	-41.357	-28.933	-32.93	-39.64	-21.737	-49.087	-46.835
-12.735	-6.633	-27.827	-30.628	-32.638	-49.182	-41.377	-26.77	-34.313	-28.731	-37.586	-37.581	-28.997	-35.043	-39.383	-32.746	-43.304	-48.273
-14.47	-7.147	-23.803	-29.571	-40.347	-52.462	-56.114	-24.043	-50.365	-29.333	-51.213	-51.206	-51.303	-39.419	-54.111	-22.732	-56.967	-54.076
-20.798	-11.375	-18.072	-24.233	-29.266	-23.485	-26.377	-16.575	-29.893	-26.604	-26.727	-26.733	-21.257	-22.494	-26.197	-17.216	-24.907	-21.807
-22.745	-12.101	-17.415	-24.611	-30.554	-25.199	-26.906	-16.052	-30.169	-27.66	-28.337	-28.343	-22.905	-23.612	-26.392	-15.973	-26.418	-23.752
-19.268	-10.02	-18.037	-28.738	-36.61	-29.797	-31.412	-16.405	-35.581	-31.441	-35.028	-35.033	-27.635	-26.494	-30.52	-17.467	-31.721	-28.591
-16.217	-8.486	-21.269	-26.738	-38.304	-34.407	-38.979	-19.449	-51.27	-29.558	-46.409	-46.422	-22.413	-28.357	-39.016	-24.697	-38.639	-12.062
-15.106	-7.541	-21.477	-29.676	-43.154	-43.295	-47.061	-20.868	-61.224	-30.606	-61.431	-61.443	-19.67	-16.035	-46.53	-20.6	-47.911	-43.116
-13.883	-7.329	-28.221	-26.575	-29.625	-43.172	-47.222	-27.109	-36.855	-27.194	-44.826	-44.812	-40.949	-31.964	-45.234	-32.711	-50.774	-43.645
-13.098	-6.724	-28.982	-26.652	-29.236	-43.004	-60.261	-27.117	-45.797	-27.274	-59.527	-59.497	-24.864	-30.926	-58.244	-35.222	-51.503	-42.413
-12.035	-6.41	-33.106	-31.6	-31.51	-44.192	-41.415	-32.941	-33.674	-30.245	-43.356	-43.341	-28.824	-32.708	-39.426	-21.114	-51.567	-44.662
-12.555	-6.557	-28.987	-30.717	-32.208	-49.259	-41.024	-28.036	-33.907	-28.768	-37.76	-37.755	-29.031	-34.693	-39.03	-25.055	-43.76	-48.807
-12.698	-6.063	-27.827	-27.178	-34.58	-65.545	-65.25	-28.13	-52.74	-26.641	-53.783	-53.779	-20.02	-42.76	-63.255	-27.717	-65.351	-67.107
-20.86	-11.649	-19.815	-19.979	-24.27	-20.472	-24.836	-17.671	-26.994	-21.924	-22.424	-22.434	-18.507	-20.361	-25.806	-19.016	-21.015	-18.419
-19.891	-10.289	-19.765	-25.302	-34.19	-29.299	-31.575	-18.016	-36.568	-27.464	-34.097	-34.105	-27.111	-25.785	-31.423	-18.954	-30.809	-27.758
-16.63	-8.514	-20.449	-27.336	-39.069	-35.588	-38.61	-18.602	-48.027	-29.284	-45.406	-45.417	-19.191	-29.352	-38.153	-20.905	-38.58	-34.511
-15.159	-7.913	-22.707	-26.704	-35.792	-34.316	-39.278	-20.664	-55.533	-29.584	-46.065	-46.077	-32.101	-27.606	-39.546	-29.208	-38.036	-11.017
-14.869	-7.725	-22.829	-26.594	-36.119	-37.341	-43.564	-20.861	-60.741	-29.327	-55.737	-55.757	-35.142	-29.323	-44.156	-28.635	-42.607	-36.46
-14.579	-7.555	-24.56	-24.607	-32.296	-42.175	-51.82	-22.833	-45.886	-26.792	-54.489	-54.47	-22.695	-31.645	-51.827	-31.493	-50.631	-42.081
-14.682	-7.601	-25.251	-23.364	-30.688	-44.335	-53.355	-23.659	-43.159	-25.266	-50.243	-50.227	-21.053	-32.704	-51.347	-33.648	-52.739	-44.647
-14.305	-7.463	-24.576	-26.184	-32.881	-45.989	-46.696	-23.256	-38.028	-27.128	-41.667	-41.66	-24.363	-34.037	-44.702	-32.435	-46.863	-46.128
-14.241	-7.093	-21.724	-28.543	-41.466	-46.234	-51.629	-20.959	-59.018	-29.377	-60.35	-60.337	-44.298	-34.84	-49.624	-22.873	-52.914	-46.454
-16.687	-8.413	-22.534	-26.989	-37	-40.699	-44.529	-21.294	-60.225	-27.856	-54.159	-54.181	-38.702	-32.788	-44.716	-20.921	-44.157	-39.969
-22.117	-12.382	-18.166	-20.156	-24.105	-20.06	-22.975	-16.051	-25.013	-21.883	-21.686	-21.693	-17.928	-19.479	-23.335	-16.581	-20.301	-18.022
-20.742	-10.79	-19.103	-25.738	-34.975	-29.021	-31.509	-17.669	-36.484	-28.341	-34.186	-34.195	-26.803	-26.165	-31.303	-18.415	-31.118	-27.773
-16.468	-8.362	-19.043	-31.939	-42.772	-36.12	-37.907	-17.824	-43.639	-34.114	-44.415	-44.423	-20.27	-15.433	-36.817	-17.754	-38.664	-35.299
-14.486	-7.251	-21.405	-28.302	-41.31	-43.623	-48.192	-20.3	-64.294	-29.486	-64.52	-64.525	-41.607	-33.466	-46.187	-22.678	-49.002	-43.339
-14.485	-7.182	-21.598	-31.082	-46.521	-45.827	-50.035	-21.473	-61.904	-31.772	-62.792	-62.789	-44.156	-35.695	-49.343	-20.81	-51.66	-46.28
-15.207	-7.786	-23.132	-24.759	-34.219	-45.187	-51.352	-21.673	-45.849	-25.976	-50.306	-50.293	-19.537	-33.985	-49.348	-27.001	-51.81	-45.761
-13.91	-7.386	-27.526	-26.732	-29.357	-45.247	-38.598	-26.77	-32.305	-25.97	-36.733	-36.726	-43.005	-34.583	-36.604	-27.382	-40.965	-44.607
-13.697	-7.178	-26.306	-28.625	-32.367	-45.65	-46.58	-25.049	-37.119	-28.343	-41.894	-41.887	-26.541	-33.114	-44.588	-31.471	-48.007	-46.163
-13.999	-6.92	-23.223	-27.753	-38.238	-52.9	-57.052	-23.025	-49.129	-27.765	-50.264	-50.258	-51.251	-38.114	-55.049	-24.067	-57.845	-54.295
-15.851	-8.045	-24.399	-23.871	-31.881	-44.228	-52.12	-22.939	-54.702	-24.531	-65.353	-65.345	-42.15	-33.743	-54.003	-25.421	-50.254	-43.948
-20.278	-11.913	-19.493	-18.102	-20.952	-17.654	-21.792	-17.112	-22.854	-19.205	-18.68	-18.689	-16.098	-17.789	-22.154	-19.425	-17.521	-15.571
-23.449	-13.063	-16.772	-21.598	-25.652	-21.312	-23.068	-14.698	-25.341	-23.238	-23.043	-23.049	-19.041	-20.232	-22.88	-14.403	-21.551	-19.42
-17.8	-9.213	-17.33	-33.189	-36.743	-32.25	-33.37	-15.856	-36.8	-36.031	-38.059	-38.064	-30.253	-16.805	-32.073	-16.204	-31.265	-31.416
-15.057	-7.677	-21.899	-26.577	-38.145	-44.151	-49.859	-20.456	-49.323	-27.92	-52.474	-52.463	-20.981	-33.669	-47.855	-24.984	-50.936	-44.586
-19.448	-10.301	-17.094	-31.527	-36.218	-31.239	-32.093	-16.004	-35.243	-34.416	-35.888	-35.891	-29.052	-16.23	-30.771	-17.042	-33.077	-30.409
-16.721	-8.847	-22.751	-24.504	-34.139	-34.512	-41.342	-21.302	-50.924	-27.348	-47.583	-47.595	-21.027	-28.817	-39.333	-26.492	-39.99	-33.804
-14.61	-7.939	-26.729	-28.367	-31.439	-35.62	-45.557	-25.764	-38.094	-30.817	-50.241	-50.242	-33.477	-30.056	-43.559	-26.841	-43.429	-35.257
-13.743	-7.344	-27.731	-28.881	-31.028	-43.156	-42.007	-26.866	-34.101	-28.358	-40.351	-40.341	-26.678	-32.75	-40.015	-26.697	-44.816	-43.368
-12.734	-6.394	-27.047	-26.489	-30.245	-57.918	-52.29	-25.542	-42.36	-26.215	-45.199	-45.194	-55.815	-36.846	-50.297	-41.059	-54.978	-58.177
-14.376	-7.082	-24.817	-30.111	-40.054	-54.141	-55.927	-25.338	-48.079	-29.522	-48.741	-48.735	-53.373	-17.165	-53.929	-23.458	-54.351	-55.313
-21.661	-12.379	-17.456	-19.261	-22.39	-18.268	-20.774	-15.16	-22.329	-20.271	-19.382	-19.387	-16.224	-17.747	-20.842	-16.057	-18.081	-16.108
-20.742	-10.79	-19.103	-25.738	-34.975	-29.021	-31.509	-17.669	-36.484	-28.341	-34.186	-34.195	-26.803	-26.165	-31.303	-18.415	-31.118	-27.773
-16.869	-8.613	-18.052	-36.315	-39.313	-35.619	-37.03	-17.413	-40.788	-39.25	-42.836	-42.84	-33.938	-16.449	-35.691	-16.274	-38.402	-35.395
-14.512	-7.22	-21.017	-30.636	-46.34	-43.88	-47.564	-20.547	-60.897	-31.659	-62.684	-62.69	-42.028	-13.645	-46.809	-20.71	-48.87	-43.81
-14.767	-7.409	-21.947	-27.182	-38.639	-43.735	-48.872	-20.738	-63.434	-28.237	-64.713	-64.721	-41.706	-33.516	-48.829	-23.158	-49.229	-43.449
-13.387	-7.173	-30.948	-29.039	-29.881	-35.737	-53.741	-29.919	-39.731	-30.271	-58.883	-58.91	-25.355	-29.167	-51.739	-26.651	-43.952	-34.822
-12.739	-6.617	-28.727	-31.42	-32.969	-43.772	-55.557	-27.266	-40.336	-30.677	-48.445	-48.433	-28.818	-31.26	-53.571	-28.59	-55.171	-43.839
-11.856	-6.183	-33.904	-31.633	-31.622	-45.828	-46.476	-33.021	-36.751	-30.134	-45.331	-45.319	-28.977	-31.939	-44.489	-22.313	-57.52	-46.139
-12.878	-6.606	-27.332	-28.806	-31.405	-52.285	-46.566	-25.944	-37.828	-27.605	-41.287	-41.282	-26.69	-0.715	-44.573	-32.944	-49.049	-52.268
-13.502	-6.564	-27.15	-25.818	-32.725	-59.474	-68.052	-27.064	-54.191	-25.388	-56.786	-56.778	-57.863	-40.402	-66.049	-26.996	-68.509	-60.944
-19.232	-9.998	-17.304	-32.637	-37.087	-32.332	-33.309	-16.141	-36.456	-35.71	-37.293	-37.297	-30.28	-17.743	-31.983	-16.335	-31.186	-31.802
-15.48	-7.717	-22.652	-32.364	-46.055	-45.49	-49.505	-22.728	-60.318	-33.032	-60.741	-60.749	-44.219	-14.457	-48.931	-20.554	-50.898	-46.331
-13.912	-6.777	-27.845	-30.7	-38.465	-56.968	-64.322	-28.133	-58.909	-30.123	-60.622	-60.611	-56.51	-3.385	-62.316	-25.587	-65.44	-59.405
-16.051	-8.28	-23.682	-22.306	-29.109	-31.188	-33.794	-21.146	-40.609	-24.258	-35.974	-35.981	-28.96	-25.332	-33.782	-26.187	-31.71	-28.946
-12.661	-6.823	-31.584	-30.522	-31.009	-32.149	-47.91	-31.893	-38.637	-32.881	-43.495	-43.531	-24.281	-31.158	-45.935	-23.938	-38.733	-31.031
-14.211	-6.934	-24.614	-32.109	-39.709	-41.23	-41.311	-24.238	-45.728	-32.854	-45.735	-45.739	-39.319	-18.623	-39.784	-21.82	-40.919	-39.3
-13.531	-6.841	-27.14	-22.704	-28.426	-42.697	-50.266	-24.937	-62.804	-24.666	-66.153	-66.193	-21.197	-31.4	-48.256	-43.809	-46.712	-9.629
-22.514	-11.878	-18.414	-23.953	-31.404	-26.097	-28.401	-17.081	-32.196	-26.813	-29.775	-29.783	-23.825	-24.301	-28.268	-16.11	-27.598	-24.65
-16.309	-9.054	-26.526	-21.069	-24.201	-22.545	-33.42	-24.181	-36.243	-22.909	-24.728	-24.753	-22.151	-24.749	-31.41	-44.111	-24.082	-21.248
-17.015	-9.465	-23.867	-24.365	-28.266	-24.999	-35.416	-21.84	-42.342	-26.701	-28.676	-28.697	-24.068	-27.04	-33.408	-35.455	-27.777	-23.73
-17.331	-9.131	-20.593	-26.71	-39.996	-36.151	-39.604	-19.298	-44.61	-29.184	-45.409	-45.411	-33.93	-30.663	-38.975	-22.713	-40.301	-35.968
-16.553	-8.416	-21.527	-26.996	-38.996	-40.636	-45.405	-20.185	-56.858	-28.21	-55.325	-55.333	-38.614	-32.725	-45.44	-21.479	-45.831	-40.471
-17.323	-8.819	-19.601	-26.956	-34.612	-30.959	-31.922	-17.417	-36.027	-28.688	-34.944	-34.949	-17.941	-26.068	-30.89	-18.233	-31.311	-28.974
-15.318	-8.172	-25.991	-23.603	-26.56	-24.824	-31.064	-23.983	-36.245	-25.414	-28.228	-28.236	-22.697	-21.833	-33.198	-33.507	-25.538	-22.436
-13.905	-7.376	-27.665	-28.444	-31.529	-38.113	-51.146	-26.38	-41.034	-29.988	-56.055	-56.03	-25.993	-29.744	-49.134	-32.559	-47.305	-8.135
-13.356	-7.227	-29.51	-31.29	-32.134	-36.073	-49.159	-28.584	-37.902	-32.619	-55.896	-55.893	-26.813	-30.137	-47.171	-25.215	-45.777	-35.479
-12.699	-6.718	-30.084	-31.416	-32.287	-44.349	-45.162	-29.141	-35.513	-30.177	-42.963	-42.953	-28.791	-32.151	-43.173	-24.821	-50.539	-44.962
-12.013	-5.599	-38.096	-27.698	-31.944	-53.913	-50.726	-39.432	-35.446	-26.217	-49.024	-49.023	-20.213	-16.365	-48.727	-36.759	-51.11	-51.588
-14.394	-7.545	-27.555	-24.21	-29.142	-37.848	-51.843	-25.958	-46.156	-26.674	-61.841	-61.861	-35.629	-29.26	-49.824	-35.901	-44.647	-36.979
-12.035	-6.41	-33.106	-31.6	-31.51	-44.192	-41.415	-32.941	-33.674	-30.245	-43.356	-43.341	-28.824	-32.708	-39.426	-21.114	-51.567	-44.662
-16.737	-8.58	-21.2	-27.023	-39.881	-41.307	-45.043	-19.989	-48.155	-28.344	-50.483	-50.473	-18.474	-33.555	-43.039	-21.935	-45.94	-41.649
-16.078	-8.388	-23.224	-23.973	-33.371	-40.098	-46.792	-21.746	-45.499	-26.034	-52.343	-52.328	-19.718	-31.695	-46.858	-27.415	-46.741	-40.141
-14.446	-7.848	-26.894	-28.4	-31.299	-37.265	-44.494	-26.005	-36.193	-30.225	-46.999	-46.981	-25.958	-30.852	-42.503	-27.077	-44.536	-37.206
-12.528	-6.524	-30.177	-31.543	-32.412	-43.363	-54.074	-28.84	-39.471	-30.678	-48.72	-48.706	-28.748	-31.072	-52.091	-26.848	-55.476	-43.326
-13.513	-6.615	-23.294	-27.379	-37.33	-46.998	-50.973	-22.653	-78.445	-28.05	-76.36	-76.391	-44.971	-35.025	-48.969	-24.404	-51.099	-46.307
-12.969	-6.193	-30.591	-25.545	-31.037	-52.98	-54.626	-30.118	-68.073	-25.091	-64.445	-64.453	-50.95	-39.76	-53.513	-28.893	-53.816	-51.47
-12.64	-6.344	-29.107	-24.876	-27.797	-59.889	-48.075	-27.868	-41.011	-24.438	-43.472	-43.468	-57.89	-38.562	-46.08	-37.477	-50.969	-56.179
-12.815	-6.532	-29.264	-26.933	-29.027	-48.084	-60.19	-27.504	-43.386	-26.729	-50.501	-50.489	-24.773	-0.796	-58.209	-33.818	-60.278	-48.255
-12.904	-6.545	-30.177	-24.716	-27.305	-41.596	-52.184	-27.87	-57.408	-25.806	-65.72	-65.765	-23.189	-30.299	-56.651	-37.871	-45.932	-8.133
-17.796	-9.461	-20.728	-24.435	-32.197	-27.203	-30.282	-18.933	-35.788	-27.377	-31.905	-31.912	-19.595	-23.789	-30.289	-22.162	-28.709	-12.11
-17.451	-9.358	-21.765	-25.634	-35.651	-32.155	-37.568	-20.531	-44.981	-28.891	-41.78	-41.789	-29.911	-28.153	-37.634	-24.18	-37.018	-31.441
-15.969	-8.435	-23.774	-23.833	-32.378	-40.163	-45.591	-22.568	-39.689	-26.321	-45.346	-45.334	-21.182	-32.058	-43.591	-28.511	-45.453	-40.349
-16.955	-9.129	-22.02	-26.712	-36.098	-31.932	-37.729	-20.779	-45.459	-30.166	-42.071	-42.079	-29.701	-27.96	-37.763	-24.873	-37.061	-31.171
-12.363	-6.675	-32.207	-26.328	-30.827	-29.846	-37.52	-29.817	-46.791	-29.237	-32.67	-32.706	-29.748	-26.988	-35.52	-39.303	-32.077	-29.346
-12.345	-6.668	-29.836	-28.307	-32.273	-31.612	-35.547	-27.484	-41.051	-31.584	-26.307	-35.021	-30.543	-26.552	-33.548	-33.398	-33.752	-30.564
-13.497	-7.732	-38.402	-22.9	-24.712	-23.074	-36.716	-36.91	-37.698	-20.9	-25.577	-25.594	-18.839	-23.074	-36.238	-70.548	-24.047	-21.887
-12.708	-7.498	-34.666	-19.912	-21.464	-20.296	-40.261	-34.498	-33.334	-22.155	-22.68	-22.706	-16.559	-24.655	-38.247	-45.13	-21.563	-20.664
-11.547	-6.857	-39.124	-22.611	-24.421	-26.132	-53.009	-40.504	-31.137	-20.611	-28.965	-28.995	-20.458	-30.616	-51.01	-68.92	-26.942	-26.656
-18.969	-11.39	-19.643	-17.343	-19.719	-16.782	-20.487	-17.253	-21.025	-17.978	-17.479	-17.488	-15.341	-16.066	-18.48	-20.258	-16.152	-14.627
-16.25	-8.242	-20.51	-29.005	-43.417	-39.785	-43.439	-19.288	-53.879	-30.459	-53.667	-53.677	-19.225	-32.41	-42.968	-20.126	-44.344	-39.529
-18.087	-9.799	-20.56	-27.089	-35.953	-30.39	-34.497	-19.416	-39.986	-30.659	-37.691	-37.697	-28.114	-27.495	-34.281	-21.889	-34.123	-29.591
-15.928	-8.43	-25.076	-23.389	-30.542	-33.453	-42.497	-23.517	-56.984	-26.389	-46.01	-46.031	-31.241	-27.603	-45.566	-31.138	-38.123	-32.253
-15.759	-8.295	-26.124	-22.154	-28.753	-32.858	-41.157	-24.323	-65.624	-24.954	-42.846	-42.864	-30.634	-26.844	-44.962	-33.643	-36.259	-31.302
-15.665	-8.167	-24.608	-22.915	-30.841	-37.161	-45.586	-22.8	-55.578	-25.233	-54.722	-54.751	-34.955	-29.4	-43.573	-29.483	-42.347	-11.147
-15.167	-7.741	-24.161	-23.44	-31.63	-41.689	-49.096	-22.311	-57.9	-24.797	-65.618	-65.643	-18.302	-31.817	-47.086	-28.247	-46.977	-40.977
-15.043	-7.64	-22.792	-25.035	-34.614	-40.871	-46.343	-20.97	-67.184	-26.525	-61.195	-61.222	-19.611	-31.544	-44.336	-25.829	-45.479	-40.066
-15.421	-7.964	-22.676	-25.065	-35.052	-39.226	-45.929	-20.839	-56.126	-27.192	-58.17	-58.179	-21.102	-30.719	-46.722	-27.189	-45.064	-38.664
-15.204	-7.969	-24.602	-24.681	-31.937	-34.033	-40.979	-22.696	-63.32	-27.505	-45.976	-45.992	-31.811	-27.401	-38.969	-32.743	-37.938	-32.651
-13.236	-7.171	-29.744	-31.409	-31.882	-35.586	-48.981	-29.209	-37.757	-32.739	-55.91	-55.93	-26.532	-30.196	-46.997	-30.062	-45.105	-34.898
-12.029	-6.381	-34.311	-30.373	-32.574	-29.467	-59.204	-34.243	-46.018	-32.529	-35.845	-35.867	-23.576	-30.022	-57.2	-32.745	-33.402	-28.06
-16.943	-8.969	-22.442	-24.678	-34.396	-32.894	-39.09	-20.925	-51.029	-27.662	-44.056	-44.071	-30.677	-27.81	-40.026	-25.802	-37.417	-31.897
-15.767	-8.281	-25.68	-22.317	-29.285	-33.775	-41.937	-23.866	-65.624	-25.004	-44.978	-44.998	-19.814	-27.391	-45.382	-32.849	-37.511	-32.342
-12.651	-6.671	-31.233	-29.076	-29.713	-48.34	-40.419	-30.555	-33.327	-27.5	-39.21	-39.202	-26.851	-33.837	-38.428	-23.561	-45.957	-48.46
-11.616	-6.11	-33.345	-30.716	-31.151	-50.801	-37.455	-33.188	-31.836	-28.516	-36.972	-36.966	-29.266	-35.192	-35.461	-19.882	-43.009	-50.049
-13.871	-7.201	-27.744	-24.369	-28.927	-46.019	-52.265	-26.322	-39.794	-25.605	-46.824	-46.812	-43.82	-32.74	-50.279	-36.141	-54.642	-46.573
-14.029	-6.867	-25.676	-26.929	-34.77	-52.136	-58.685	-25.437	-61.471	-26.772	-66.681	-66.659	-50.319	-38.114	-56.677	-24.651	-58.221	-52.291
-13.34	-6.438	-26.012	-29.831	-39.079	-54.682	-61.022	-26.238	-61.939	-29.495	-62.969	-62.958	-53.33	-16.444	-59.016	-24.522	-61.948	-55.725
-14.516	-7.18	-24.142	-28.399	-38.08	-53.491	-56.996	-24.269	-48.66	-28.097	-49.961	-49.954	-52.199	-39.611	-54.993	-23.337	-56.457	-54.757
-23.197	-12.705	-33.193	-33.252	-38.578	-51.342	-57.261	-32.748	-69.668	-33.627	-67.779	-67.839	-50.813	-16.604	-64.229	-27.145	-56.445	-27.326
-15.917	-8.007	-21.285	-31.187	-46.749	-44.549	-47.824	-21.089	-53.031	-31.984	-53.3	-53.291	-19.901	-17.479	-46.699	-19.967	-49.224	-45.545
-16.9	-9.215	-22.262	-23.886	-27.948	-23.332	-28.571	-20.597	-32.795	-25.7	-26.622	-26.63	-21.284	-21.85	-29.67	-24.34	-24.478	-21.214
-17.171	-9.315	-23.176	-20.567	-25.782	-23.208	-28.109	-21.337	-31.615	-23.373	-25.919	-25.928	-21.084	-21.023	-29.851	-24.945	-23.675	-20.859
-17.428	-8.888	-19.911	-28.074	-38.65	-34.057	-36.154	-18.102	-42.592	-30.034	-41.104	-41.113	-31.961	-28.697	-34.15	-18.998	-36.072	-32.779
-17.113	-8.924	-21.958	-23.903	-32.074	-30.687	-33.981	-19.837	-41.566	-26.342	-36.7	-36.709	-28.473	-25.703	-34.161	-23.807	-32.349	-28.887
-13.023	-7.03	-33.575	-22.501	-24.723	-23.165	-42.444	-31.617	-42.53	-23.734	-25.411	-25.432	-17.557	-25.789	-54.876	-46.904	-24.327	-21.603
-12.995	-7.026	-32	-20.984	-23.148	-21.413	-36.894	-29.995	-35.349	-21.845	-23.087	-23.107	-16.303	-24.039	-43.806	-51.497	-22.016	-19.826
-10.142	-5.07	-41.573	-24.563	-28.338	-30.141	-53.191	-39.667	-76.572	-26.405	-22.563	-32.082	-22.423	-36.425	-51.215	-39.794	-31.776	-30.55
-10.145	-5.085	-39.4	-25.85	-29.865	-32.635	-47.322	-37.472	-55.953	-28.057	-34.472	-34.526	-23.809	-35.432	-45.337	-36.593	-34.724	-33.065
-10.518	-5.366	-41.979	-24.354	-28.083	-29.943	-51.098	-39.597	-59.326	-26.475	-22.354	-31.969	-22.295	-33.35	-49.105	-46.693	-31.613	-30.32
-15.643	-7.86	-18.872	-35.02	-39.41	-35.576	-36.265	-18.371	-39.615	-37.135	-41.036	-41.04	-33.798	-15.322	-34.776	-16.718	-36.71	-34.416
-17.029	-9.025	-21.951	-23.952	-31.317	-27.883	-31.5	-20.031	-37.959	-26.931	-32.902	-32.909	-25.663	-23.947	-29.493	-24.582	-29.4	-25.945
-17.989	-9.527	-21.338	-22.819	-30.027	-26.756	-29.646	-19.346	-34.571	-25.277	-30.642	-30.649	-24.534	-23.176	-29.897	-22.274	-27.622	-24.677
-20.068	-10.284	-19.294	-26.975	-36.06	-30.589	-32.558	-17.62	-37.396	-29.158	-35.72	-35.729	-28.446	-27.003	-32.153	-18	-32.301	-29.288
-17.571	-9.544	-22.898	-23.68	-30.252	-26.67	-34.083	-21.416	-42.259	-27.493	-32.468	-32.48	-24.575	-24.976	-32.071	-24.227	-29.624	-25.081
-14.833	-7.702	-24.084	-24.784	-32.972	-39.679	-48.607	-22.265	-50.332	-27.264	-60.608	-60.621	-37.484	-30.512	-46.596	-31.968	-46.549	-10.787
-13.208	-6.585	-25.486	-24.427	-30.985	-46.184	-53.276	-23.626	-61.212	-26.007	-80.735	-80.681	-22.574	-33.294	-54.238	-36.172	-51.161	-45.313
-15.374	-7.87	-21.683	-25.901	-35.942	-35.507	-38.628	-19.498	-49.402	-28.052	-45.009	-45.018	-21.155	-28.422	-38.178	-24.526	-37.931	-12.853
-13.891	-7.457	-29.946	-28.59	-29.996	-30.375	-46.529	-28.623	-53.01	-30.607	-39.52	-39.538	-23.136	-26.581	-44.502	-29.77	-34.521	-28.756
-13.568	-7.263	-29.048	-30.903	-32.751	-32.43	-47.668	-27.737	-48.403	-32.948	-45.562	-45.583	-25.367	-27.39	-51.302	-28.484	-37.898	-31.068
-13.086	-7.028	-31.412	-31.126	-31.891	-32.418	-53.117	-30.287	-44.039	-32.845	-45.418	-45.444	-25.113	-28.114	-51.099	-26.5	-38.202	-31.062
-17.578	-9.403	-21.48	-23.371	-30.337	-26.076	-29.64	-19.697	-34.901	-26.476	-30.231	-30.238	-23.868	-22.963	-30.052	-23.201	-27.324	-24.066
-16.937	-8.976	-23.805	-21.5	-27.683	-27.141	-31.396	-21.707	-37.423	-24.167	-31.276	-31.285	-24.916	-23.158	-32.691	-26.864	-28.037	-24.93
-16.322	-8.518	-22.998	-23.837	-32.522	-33.037	-37.853	-20.983	-50.995	-26.353	-41.98	-41.992	-30.823	-27.109	-35.846	-26.095	-35.878	-31.53
-17.715	-9.212	-22.358	-23.273	-31.439	-31.297	-34.869	-20.293	-42.974	-25.311	-37.486	-37.497	-29.09	-26.272	-35.461	-23.388	-33.037	-29.561
-11.65	-6.109	-37.039	-29.538	-29.037	-47.003	-41.487	-37.159	-35.248	-28.085	-44.349	-44.333	-26.971	-32.683	-39.498	-20.176	-56.295	-47.446
-10.547	-5.443	-37.644	-34.593	-34.022	-42.878	-40.195	-38.273	-34.75	-33.489	-51.137	-51.101	-30.036	-34.807	-38.204	-17.084	-60.234	-42.547
-11.583	-6.115	-36.426	-34.023	-33.891	-34.921	-55.479	-35.951	-40.251	-34.923	-52.831	-52.874	-27.423	-29.942	-53.515	-36.198	-41.942	-33.671
-11.465	-6.039	-36.291	-34.507	-33.913	-38.09	-51.162	-35.544	-38.448	-34.438	-67.847	-67.767	-29.02	-30.562	-49.186	-36.198	-48.081	-37.187
-13.176	-6.67	-27.338	-24.374	-29.127	-53.953	-55.549	-25.725	-43.1	-25.107	-47.257	-47.25	-22.877	-1.343	-53.56	-41.058	-58.934	-55.169
-14.833	-7.382	-22.361	-28.85	-40.837	-46.853	-52.136	-21.953	-58.366	-29.341	-60.25	-60.236	-45.091	-15.676	-51.815	-21.762	-53.326	-47.374
-17.233	-8.925	-20.997	-26.017	-37.931	-35.27	-39.55	-19.28	-50.485	-28.096	-46.62	-46.634	-18.903	-29.375	-39.68	-22.276	-39.327	-34.464
-17.467	-8.899	-19.238	-32.129	-44.215	-37.099	-39.384	-18.255	-45.298	-34.154	-46.031	-46.038	-35.247	-16.159	-38.455	-17.743	-40.661	-36.946
-20.742	-10.79	-19.103	-25.738	-34.975	-29.021	-31.509	-17.669	-36.484	-28.341	-34.186	-34.195	-26.803	-26.165	-31.303	-18.415	-31.118	-27.773
-17.685	-9.467	-21.212	-26.019	-36.356	-31.509	-36.481	-19.922	-44.609	-29.346	-40.676	-40.685	-29.268	-27.703	-36.349	-23.389	-36.018	-30.686
-12.849	-6.958	-30.303	-31.519	-31.675	-38.502	-43.755	-30.222	-34.802	-31.818	-49.931	-49.903	-27.485	-31.661	-41.768	-22.931	-48.812	-38.299
-13.356	-7.296	-28.032	-31.406	-32.098	-38.976	-41.274	-28.03	-33.705	-31.47	-44.269	-44.252	-36.862	-32.241	-39.284	-23.158	-45.946	-39.134
-12.992	-6.518	-25.65	-26.154	-31.713	-55.946	-55.339	-24.168	-43.695	-26.569	-46.459	-46.454	-53.873	-1.217	-53.347	-36.655	-56.899	-57.007
-14.873	-7.523	-21.583	-26.863	-38.373	-40.107	-44.139	-19.841	-62.194	-28.519	-57.055	-57.072	-21.065	-31.283	-43.803	-23.81	-44.122	-39.222
-14.289	-7.075	-22.94	-32.27	-44.898	-49.596	-47.36	-23.882	-43.146	-31.321	-42.73	-42.727	-48.756	-17.567	-45.362	-22.254	-45.791	-47.331
-15.844	-7.966	-20.907	-32.72	-49.415	-43.643	-46.808	-20.851	-53.461	-33.729	-54.199	-54.198	-20.555	-14.947	-45.676	-19.408	-48.465	-44.654
-15.675	-8.352	-23.893	-26.246	-33.893	-34.33	-42.699	-22.49	-49.209	-29.468	-49.213	-49.225	-32.118	-28.466	-40.69	-29.365	-40.511	-33.558
-14.807	-7.771	-26.228	-24.337	-30.234	-35.3	-45.151	-24.474	-55.089	-27.042	-50.855	-50.881	-33.078	-28.032	-43.136	-35.907	-40.219	-34.077
-13.965	-7.208	-24.859	-26.096	-32.769	-45.766	-53.897	-23.204	-42.573	-27.451	-47.727	-47.717	-24.401	-32.982	-51.891	-35.207	-53.67	-46.338
-12.247	-6.413	-32.441	-31.675	-31.821	-41.939	-52.335	-31.314	-38.64	-30.896	-50.82	-50.799	-28.666	-30.679	-50.356	-24.036	-54.521	-41.626
-10.797	-5.584	-41.827	-34.387	-33.723	-37.352	-53.106	-41.557	-41.409	-34.581	-62.268	-62.345	-28.619	-30.308	-51.136	-41.064	-44.56	-36.08
-12.205	-6.523	-33.197	-32.885	-33.566	-32.096	-56.916	-32.931	-42.045	-35.273	-43.429	-43.455	-25.687	-29.707	-54.921	-23.555	-37.941	-30.777
-14.108	-7.244	-23.998	-26.076	-33.713	-38.655	-44.835	-21.814	-67.854	-28.507	-57.717	-57.739	-24.528	-29.544	-45.528	-34.146	-43.191	-10.151
-14.675	-7.611	-22.541	-26.921	-36.777	-45.084	-48.131	-21.129	-40.775	-28.19	-43.071	-43.065	-24.217	-34.187	-46.13	-28.755	-47.284	-45.284
-13.641	-6.838	-24.042	-25.417	-33.671	-51.805	-58.703	-22.735	-46.882	-26.351	-49.818	-49.811	-49.769	-35.86	-56.699	-30.607	-59.249	-52.841
-13.864	-6.8	-23.171	-31.403	-45.163	-52.146	-55.637	-23.638	-52.01	-31.161	-51.516	-51.51	-51.143	-39.346	-53.635	-22.353	-56.998	-53.944
-27.874	-14.778	-15.104	-31.826	-40.793	-33.302	-39.727	-16.126	-46.154	-37.214	-47.972	-47.979	-31.125	-37.517	-39.305	-16.103	-46.528	-37.394
-15.352	-8.22	-25.469	-26.222	-31.776	-33.416	-44.088	-24.157	-47.849	-29.248	-48.182	-48.203	-31.232	-28.023	-45.453	-29.971	-39.505	-32.45
-15.994	-8.069	-21.856	-26.814	-37.571	-39.802	-43.399	-20.403	-58.093	-27.937	-53.06	-53.078	-17.997	-31.823	-43.226	-21.337	-43.143	-38.906
-15.75	-7.873	-21.62	-33.419	-46.514	-42.029	-44.694	-21.527	-53.669	-34.63	-54.543	-54.557	-40.561	-34.802	-43.814	-19.37	-45.664	-42.067
-15.481	-7.728	-24.726	-33.994	-46.213	-49.498	-53.776	-25.262	-55.023	-34.063	-55.279	-55.268	-21.961	-4.573	-52.592	-22.557	-55.046	-52.239
-14.782	-7.293	-23.418	-33.175	-43.962	-43.384	-45.125	-23.381	-53.087	-34.002	-53.437	-53.447	-41.786	-18.984	-43.982	-21.009	-45.45	-42.671
-15.66	-7.899	-21.844	-26.735	-37.662	-40.361	-44.241	-20.379	-60.853	-27.898	-55.38	-55.399	-18.385	-31.979	-44.083	-21.953	-44.057	-39.54
-13.977	-6.921	-23.75	-25.466	-34.075	-45.028	-49.31	-22.531	-80.825	-26.279	-67.574	-67.604	-42.937	-33.797	-49.089	-25.682	-48.647	-44.067
-13.152	-6.513	-25.098	-24.777	-31.854	-48.16	-55.457	-23.546	-60.005	-26.111	-70.358	-70.329	-22.479	-34.388	-53.449	-32.727	-53.778	-47.521
-12.71	-6.041	-29.203	-32.56	-41.049	-61.688	-66.451	-29.694	-55.58	-31.62	-55.578	-55.573	-63.385	-12.12	-64.452	-27.359	-65.153	-65.646
-16.308	-8.385	-20.694	-30.233	-42.179	-48.479	-43.187	-21.134	-38.574	-29.116	-38.453	-38.449	-20.131	-16.534	-41.191	-21.328	-42.167	-46.146
-13.584	-6.618	-25.962	-29.102	-37.782	-55.59	-50.401	-26.755	-44.4	-28.09	-44.905	-44.902	-54.507	-16.212	-48.404	-25.275	-49.789	-52.233
-13.683	-6.733	-27.636	-24.497	-30.744	-53.233	-46.744	-28.042	-41.514	-23.641	-42.785	-42.782	-51.301	-44.91	-44.747	-29.306	-47.204	-49.59
-14.665	-7.254	-23.032	-35.555	-52.678	-47.121	-51.335	-23.573	-59.494	-36.069	-60.13	-60.123	-46.644	-14.006	-50.278	-21.261	-53.397	-49.174
-13.265	-6.432	-31.429	-38.463	-46.645	-56.816	-65.164	-31.989	-57.367	-37.373	-56.943	-56.938	-25.819	-3.643	-63.164	-29.519	-63.671	-64.654
-13.273	-6.397	-27.237	-36.44	-48.634	-52.5	-57.996	-27.623	-71.322	-36.208	-68.882	-68.869	-52.924	-41.497	-55.992	-25.25	-59.798	-55.244
-15.226	-7.928	-23.402	-24.998	-31.715	-31.198	-34.827	-21.05	-43.918	-27.854	-37.753	-37.76	-28.963	-25.35	-32.821	-29.932	-32.82	-29.226
-13.09	-7.019	-30.886	-31.306	-31.971	-34.159	-53.608	-29.792	-41.951	-32.645	-52.396	-52.433	-26.045	-28.629	-51.589	-26.233	-41.224	-33.023
-14.213	-7.419	-26.017	-25.952	-31.515	-38.868	-50.512	-24.295	-47.329	-28.24	-62.278	-62.293	-36.653	-29.719	-48.498	-36.105	-46.129	-9.711
-13.861	-6.975	-24.807	-24.192	-31.799	-52.013	-59.288	-23.458	-45.958	-25.076	-49.599	-49.591	-49.966	-35.926	-57.288	-31.535	-59.412	-53.065
-16.922	-8.966	-21.461	-26.109	-35.907	-31.27	-35.913	-19.821	-46.232	-29.46	-40.144	-40.154	-29.054	-26.686	-36.231	-24.517	-34.811	-30.018
-17.066	-8.977	-21.236	-25.947	-37.761	-34.205	-39.196	-19.68	-49.156	-28.642	-45.803	-45.814	-21.058	-28.779	-37.19	-23.816	-38.958	-12.622
-15.845	-8.248	-23.862	-23.403	-31.919	-36.494	-43.569	-21.992	-61.417	-25.67	-51.712	-51.736	-34.292	-29.119	-45.43	-28.965	-41.115	-35.467
-13.786	-6.881	-25.607	-23.898	-31.032	-57.238	-52.991	-24.851	-43.561	-24.076	-45.901	-45.896	-55.334	-38.981	-50.997	-30.662	-54.097	-57.334
-15.178	-8.157	-26.492	-26.362	-30.763	-32.051	-44.34	-25.21	-49.323	-29.31	-44.509	-44.531	-29.909	-27.41	-42.324	-30.124	-37.466	-30.848
-14.38	-7.52	-27.111	-24.173	-29.491	-39.116	-52.703	-25.502	-45.221	-26.587	-62.562	-62.555	-36.901	-29.883	-54.273	-36.101	-46.664	-9.131
-13.387	-7.173	-30.948	-29.039	-29.881	-35.737	-53.741	-29.919	-39.731	-30.271	-58.883	-58.91	-25.355	-29.167	-51.739	-26.651	-43.952	-34.822
-15.547	-7.76	-23.451	-34.503	-48.756	-46.452	-50.698	-23.822	-59.714	-35.123	-60.37	-60.377	-21.859	-14.42	-49.916	-21.251	-52.437	-48.25
-14.252	-7.04	-29.371	-37.519	-46.525	-53.514	-61.361	-29.79	-65.085	-37.14	-64.853	-64.84	-56.152	-4.435	-59.357	-27.182	-63.28	-58.995
-14.475	-7.112	-26.298	-31.417	-40.271	-50.933	-55.562	-26.433	-72.243	-31.319	-74.307	-74.318	-49.761	-18.568	-55.358	-23.853	-56.115	-51.621
-16.547	-9.272	-22.428	-24.028	-27.87	-22.497	-30.921	-20.79	-34.968	-25.483	-25.492	-25.503	-21.216	-24.111	-28.912	-30.216	-24.274	-20.741
-14.45	-7.244	-21.867	-27.413	-39.18	-44.391	-49.794	-20.646	-61.323	-28.544	-64.998	-64.985	-42.355	-33.654	-47.788	-23.767	-50.376	-44.202
-14.936	-7.54	-22.286	-26.057	-36.522	-42.2	-47.438	-20.718	-65.656	-27.335	-64.176	-64.194	-19.702	-32.47	-47.631	-24.317	-47.184	-41.621
-14.557	-7.801	-26.219	-28.184	-32.395	-36.387	-47.14	-25.035	-41.133	-30.622	-53.215	-53.213	-34.2	-29.56	-45.129	-29.538	-44.7	-35.942
-14.318	-7.683	-26.951	-28.324	-31.753	-37.313	-47.99	-25.856	-39.117	-30.283	-51.823	-51.803	-25.952	-30.06	-45.986	-29.399	-45.958	-37.027
-12.607	-6.77	-34.869	-23.102	-26.919	-27.385	-41.144	-32.367	-49.899	-25.491	-29.012	-29.056	-19.957	-28.51	-39.141	-53.991	-28.937	-27.098
-12.246	-6.489	-33.768	-23.206	-26.972	-26.339	-45.345	-31.483	-52.354	-25.064	-28.191	-21.206	-19.542	-30.933	-43.345	-22.926	-28.28	-26.134
-12.524	-6.676	-32.699	-23.525	-27.395	-26.585	-43.253	-30.401	-52.598	-25.524	-28.444	-28.483	-19.753	-30.216	-41.252	-45.92	-28.586	-26.256
-17.559	-9.813	-22.187	-24.137	-28.313	-24.462	-33.095	-20.777	-38.502	-26.782	-28.63	-28.645	-22.852	-25.15	-31.084	-26.329	-27.135	-22.919
-21.349	-11.608	-18.157	-23.452	-29.641	-24.727	-28.051	-17.126	-31.917	-27.147	-28.223	-28.23	-22.469	-23.539	-27.981	-17.153	-26.358	-23.22
-20.995	-13.796	-16.818	-16.661	-19.234	-15.369	-17.956	-14.487	-18.309	-16.428	-15.838	-15.844	-13.636	-15.001	-18.485	-14.928	-14.561	-13.308
-17.391	-10.739	-20.237	-14.311	-16.341	-14.126	-21.204	-18.383	-18.612	-14.328	-14.331	-14.351	-13.383	-14.561	-23.148	-18.526	-12.981	-11.934
-19.606	-12.429	-18.378	-15.646	-18.201	-15.273	-19.036	-16.089	-18.859	-16.151	-15.668	-15.676	-13.788	-14.875	-20.312	-16.842	-14.38	-13.009
-18.629	-12.367	-17.721	-14.636	-16.934	-14.179	-18.13	-15.551	-17.099	-14.697	-14.267	-14.275	-12.57	-13.47	-19.641	-15.679	-12.869	-11.786
-14.555	-7.221	-23.354	-27.977	-38.287	-51.112	-56.075	-23.153	-50.909	-28.009	-52.592	-52.582	-49.508	-13.232	-54.072	-23.067	-57.085	-52.494
-14.895	-7.992	-25.728	-28.35	-32.933	-33.17	-44.137	-24.419	-48.067	-31.102	-48.088	-48.108	-31.004	-27.885	-45.38	-29.982	-39.349	-8.688
-15.118	-7.901	-23.657	-24.983	-33.678	-42.208	-48.61	-22.201	-42.092	-27.144	-47.429	-47.417	-22.636	-32.355	-46.604	-30.141	-48.534	-42.603
-14.544	-7.251	-23.175	-26.696	-36.574	-49.598	-56.001	-22.504	-51.252	-27.019	-53.951	-53.94	-47.738	-36.458	-53.996	-23.488	-56.956	-50.485
-13.744	-7.114	-23.99	-28.239	-34.334	-48.148	-43.094	-22.749	-36.44	-27.728	-38.283	-38.279	-46.045	-36.166	-41.098	-32.422	-43.103	-46.524
-13.994	-6.974	-21.398	-32.706	-42.217	-45.135	-41.505	-22.578	-38.75	-31.456	-37.915	-37.913	-43.781	-39.853	-39.506	-21.762	-39.882	-41.51
-15.695	-8.11	-21.647	-26.394	-38.32	-42.35	-46.544	-20.234	-45.165	-28.054	-47.955	-47.945	-21.057	-33.295	-45.879	-24.869	-47.408	-42.77
-16.119	-8.188	-21.694	-25.864	-36.065	-36.949	-40.065	-19.802	-51.195	-27.335	-46.784	-46.796	-34.818	-29.805	-39.771	-22.094	-39.44	-35.632
-15.21	-7.756	-22.807	-24.751	-34.173	-39.092	-44.023	-20.834	-66.677	-26.43	-54.866	-54.887	-19.661	-30.518	-44.382	-26.081	-42.966	-38.033
-14.959	-7.642	-22.45	-25.849	-36.345	-45.02	-50.837	-20.981	-47.078	-27.154	-50.615	-50.604	-20.906	-33.904	-48.833	-25.384	-51.665	-45.584
-14.454	-7.362	-26.38	-22.135	-28.859	-49.156	-59.529	-24.825	-45.728	-23.11	-52.062	-52.048	-18.14	-34.734	-57.522	-33.835	-58.611	-49.636
-13.829	-7.008	-27.082	-22.225	-28.419	-54.485	-55.195	-25.684	-43.336	-23.184	-47.463	-47.455	-19.577	-2.014	-53.206	-37.361	-58.061	-55.715
-16.222	-8.138	-21.537	-34.938	-46.212	-40.546	-42.676	-21.478	-49.25	-36.51	-50.125	-50.136	-21.65	-15.126	-41.652	-19.003	-43.489	-40.493
-14.438	-7.122	-25.684	-39.321	-49.733	-45.656	-48.491	-25.96	-55.98	-40.359	-58.105	-58.116	-45.489	-13.227	-47.235	-23.526	-49.382	-46.734
-15.6	-7.761	-22.107	-30.615	-39.964	-39.563	-40.791	-21.469	-47.085	-31.652	-46.502	-46.509	-37.654	-17.859	-39.669	-19.525	-40.642	-38.162
-15.538	-7.725	-24.284	-30.167	-39.328	-44.282	-46.723	-23.932	-58.733	-30.646	-56.092	-56.108	-19.795	-35.526	-46.083	-21.479	-46.638	-43.495
-16.174	-8.375	-20.278	-28.492	-42.635	-41.181	-43.496	-19.17	-42.36	-29.862	-43.097	-43.091	-21.39	-34.045	-41.825	-22.207	-43.496	-41.014
-14.985	-7.553	-23.061	-25.383	-34.855	-44.64	-51.436	-21.682	-56.566	-26.284	-64.04	-64.017	-18.577	-33.764	-49.427	-24.892	-50.901	-44.456
-13.682	-6.647	-26.545	-27.975	-35.787	-55.97	-63.8	-26.623	-58.205	-27.56	-60.725	-60.714	-54.486	-15.814	-61.793	-25.142	-64.028	-57.054
-14.544	-7.251	-23.175	-26.696	-36.574	-49.598	-56.001	-22.504	-51.252	-27.019	-53.951	-53.94	-47.738	-36.458	-53.996	-23.488	-56.956	-50.485
-15.171	-7.787	-24.961	-22.602	-30.199	-40.519	-48.508	-23.004	-57.634	-24.19	-62.846	-62.886	-38.339	-31.017	-51.039	-30.583	-45.507	-11.223
-13.513	-6.536	-27.475	-32.85	-42.156	-55.351	-61.945	-27.835	-62.706	-32.36	-62.913	-62.901	-55.216	-18.797	-59.939	-25.385	-63.514	-57.904
-11.699	-5.407	-33.956	-35.867	-42.688	-58.986	-56.166	-34.721	-32.263	-34.337	-51.246	-51.245	-58.518	-20.228	-54.167	-32.375	-55.53	-56.963
-12.434	-5.871	-29.09	-33.37	-42.727	-61.419	-66.559	-29.585	-27.596	-32.435	-55.665	-55.661	-63.328	-18.36	-64.559	-27.331	-65.227	-65.615
-13.619	-6.74	-24.147	-25.091	-33.278	-46.217	-51.417	-22.806	-69.976	-26.106	-78.657	-78.698	-44.11	-34.032	-51.478	-27.927	-50.534	-45.376
-12.223	-6.234	-31.692	-29.368	-29.816	-46.514	-59.064	-30.08	-42.588	-28.43	-51.117	-51.103	-26.954	-31.806	-57.087	-27.516	-59.239	-46.397
-15.997	-8.012	-22.783	-29.1	-40.146	-44.613	-49.122	-22.279	-62.885	-29.713	-61.602	-61.611	-42.888	-17.095	-49.135	-20.83	-49.679	-44.78
-16.596	-8.409	-22.976	-25.297	-34.487	-39.99	-44.441	-21.404	-63.385	-26.208	-53.827	-53.85	-37.909	-31.93	-45.055	-22.366	-43.497	-39.086
-14.857	-7.514	-22.847	-25.304	-34.955	-42.922	-49.143	-21.217	-60.167	-26.564	-65.758	-65.766	-19.577	-32.665	-47.135	-25.307	-48.484	-42.435
-13.54	-6.798	-24.626	-24.984	-32.54	-52.882	-59.129	-23.255	-45.681	-25.944	-48.769	-48.762	-50.835	-36.037	-57.13	-31.42	-59.456	-54.05
-12.979	-6.244	-26.339	-27.313	-35.423	-59.13	-67.306	-26.456	-55.65	-27.014	-57.09	-57.084	-20.005	-40.345	-65.302	-26.352	-68.231	-60.634
-15.056	-7.453	-24.989	-31.97	-41.625	-46.42	-49.225	-24.958	-63.086	-32.346	-61.28	-61.3	-44.955	-13.838	-48.529	-22.34	-49.525	-46.188
-14.454	-7.362	-26.38	-22.135	-28.859	-49.156	-59.529	-24.825	-45.728	-23.11	-52.062	-52.048	-18.14	-34.734	-57.522	-33.835	-58.611	-49.636
-14.301	-7.441	-26.367	-24.203	-30.145	-42.16	-53.676	-24.757	-43.297	-26.312	-53.514	-53.493	-22.872	-31.339	-51.668	-36.105	-51.41	-42.02
-13.955	-7.284	-28.521	-24.362	-28.462	-42.365	-55.694	-27.093	-40.958	-25.987	-52.13	-52.107	-40.155	-31.19	-53.689	-34.158	-52.575	-9.209
-15.352	-8.22	-25.469	-26.222	-31.776	-33.416	-44.088	-24.157	-47.849	-29.248	-48.182	-48.203	-31.232	-28.023	-45.453	-29.971	-39.505	-32.45
-16.2	-8.167	-20.504	-32.086	-47.631	-41.548	-44.737	-20.083	-52.465	-33.397	-53.37	-53.377	-20.15	-15.162	-43.89	-18.954	-46.324	-41.982
-16.995	-8.576	-21.782	-27.471	-37.659	-38.162	-40.89	-20.363	-50.731	-28.593	-47.468	-47.481	-36.135	-31.316	-40.6	-19.946	-40.538	-37.06
-14.444	-7.144	-21.5	-41.205	-46.387	-42.226	-44.807	-22.098	-50.049	-43.282	-54.418	-54.425	-41.65	-14.096	-43.394	-19.854	-46.496	-43.315
-16.211	-8.218	-20.663	-31.013	-46.029	-43.636	-45.587	-20.461	-45.371	-31.646	-45.454	-45.448	-41.962	-14.979	-44.192	-20.003	-45.733	-43.825
-11.694	-5.833	-33.679	-27.436	-27.398	-59.041	-45.167	-32.654	-40.185	-25.565	-42.372	-42.369	-25.353	-38.18	-43.172	-41.064	-49.188	-54.838
-11.993	-5.599	-28.965	-33.701	-44.22	-62.348	-66.142	-29.466	-55.929	-32.79	-54.937	-54.933	-64.112	-44.962	-64.144	-27.378	-64.498	-66.066
-13.291	-6.64	-26.652	-23.376	-29.595	-58.639	-50.172	-25.742	-42.154	-23.905	-44.364	-44.36	-21.111	-1.744	-48.177	-36.007	-51.822	-56.11
-13.222	-6.36	-27.332	-33.653	-43.909	-55.157	-61.548	-27.718	-63.877	-33.172	-63.12	-63.11	-55.147	-41.8	-59.543	-25.356	-63.351	-57.826
-15.716	-7.87	-21.916	-29.035	-41.059	-42.713	-46.489	-21.188	-61.188	-29.902	-59.429	-59.447	-40.848	-16.435	-46.181	-20.491	-46.966	-42.429
-14.841	-7.404	-24.504	-24.627	-32.377	-44.054	-48.388	-23.188	-80.126	-25.145	-61.672	-61.698	-41.967	-33.63	-48.572	-24.856	-47.193	-42.979
-15.917	-7.999	-19.977	-31.254	-42.298	-37.335	-38.898	-18.987	-44.925	-32.955	-45.167	-45.174	-35.395	-14.923	-37.78	-18.249	-39.243	-36.229
-16.975	-8.556	-21.259	-28.548	-38.769	-37.551	-39.752	-19.937	-47.676	-29.818	-45.727	-45.738	-35.554	-15.127	-39.166	-19.154	-39.585	-36.399
-16.655	-8.364	-21.38	-27.531	-35.348	-35.176	-36.194	-19.743	-41.368	-28.735	-39.975	-39.982	-33.093	-29.065	-35.203	-19.003	-35.515	-33.256
-19.359	-10.003	-19.591	-24.005	-30.089	-26.796	-27.835	-17.295	-31.057	-25.514	-29.37	-29.375	-24.602	-23.127	-27.241	-17.941	-26.645	-24.566
-17.651	-9.749	-22.842	-18.299	-22.688	-20.754	-25.839	-20.909	-27.383	-20.375	-22.424	-22.434	-18.736	-19.359	-28.247	-22.91	-20.587	-18.245
-13.691	-7.479	-30.036	-18.412	-20.976	-19.851	-33.383	-27.497	-29.856	-19.359	-21.185	-21.217	-20.873	-24.189	-37.752	-31.172	-20.474	-19.077
-15.662	-8.775	-25.063	-20.51	-23.671	-20.042	-29.782	-22.887	-29.895	-21.269	-21.571	-21.587	-19.818	-22.904	-27.771	-31.828	-20.722	-18.414
-18.742	-9.738	-18.63	-29.344	-39.9	-32.682	-34.928	-17.178	-40.113	-32.085	-39.85	-39.856	-30.534	-28.761	-34.072	-17.706	-35.81	-32.008
-13.091	-6.533	-26.176	-24.239	-30.161	-46.864	-55.175	-24.261	-58.382	-25.78	-73.572	-73.529	-22.668	-1.407	-56.835	-39.95	-52.322	-46.061
-13.895	-7.134	-26.256	-24.179	-30.127	-41.801	-52.975	-24.241	-50.516	-26.265	-68.674	-68.634	-22.853	-30.913	-50.96	-39.951	-48.439	-41.07
-21.892	-11.48	-18.016	-30.097	-47.126	-34.454	-39.07	-17.4	-47.436	-32.871	-46.452	-46.467	-32.347	-32.094	-39.193	-18.088	-40.537	-34.913
-16.448	-8.454	-21.574	-25.669	-36.794	-36.801	-41.192	-19.723	-55.548	-27.476	-49.506	-49.522	-18.811	-29.867	-41.393	-23.111	-40.679	-35.877
-13.433	-6.917	-29.366	-24.514	-27.922	-42.439	-60.211	-27.544	-45.879	-25.844	-62.214	-62.173	-23.112	-30.819	-58.191	-41.041	-50.381	-41.768
-14.85	-7.673	-26.045	-22.215	-29.048	-38.499	-47.034	-23.987	-58.587	-24.414	-56.681	-56.714	-19.864	-29.619	-45.02	-35.518	-42.994	-10.213
-15.682	-8.04	-24.285	-22.953	-30.978	-39.334	-45.734	-22.326	-67.135	-24.334	-56.01	-56.039	-37.163	-30.665	-47.44	-27.694	-43.437	-11.884
-12.738	-6.757	-33.918	-29.317	-29.29	-35.939	-59.123	-32.838	-41.036	-29.98	-58.855	-58.918	-25.389	-28.774	-57.152	-25.266	-43.069	-34.766
-12.555	-6.474	-33.573	-27.334	-27.744	-42.54	-62.131	-32.105	-42.986	-27.141	-58.571	-58.535	-25.025	-30.487	-60.168	-27.185	-51.857	-41.847
-12.59	-6.435	-29.533	-29.106	-30.488	-44.488	-61.879	-27.707	-44.562	-28.755	-54.844	-54.826	-26.872	-31.28	-59.872	-31.288	-54.64	-44.099
-13.281	-7.057	-28.645	-31.192	-32.911	-38.66	-52.154	-27.445	-39.782	-31.798	-53.763	-53.739	-27.979	-29.976	-50.15	-27.01	-48.878	-38.251
-13.967	-7.625	-27.654	-30.928	-32.432	-31.563	-47.299	-27.248	-42.678	-33.461	-44.158	-44.183	-24.577	-28.931	-45.297	-26.151	-38.11	-30.462
-20.425	-10.783	-16.507	-40.331	-34.764	-36.441	-39.081	-16.433	-38.534	-42.752	-43.569	-43.57	-35.205	-19.618	-37.84	-15.881	-38.592	-38.3
-15.53	-7.732	-23.583	-33.93	-43.259	-42.137	-43.624	-23.471	-50.133	-34.952	-50.154	-50.163	-21.754	-14.287	-42.485	-20.834	-43.79	-41.37
-14.146	-6.961	-27.364	-39.599	-43.795	-42.658	-42.878	-27.047	-45.983	-40.871	-46.641	-46.644	-25.709	-4.367	-41.21	-24.713	-42.577	-41.398
-17.103	-8.593	-20.969	-30.296	-37.064	-34.862	-35.296	-19.801	-39.012	-31.591	-38.55	-38.555	-19.575	-15.535	-34.074	-17.595	-34.803	-32.983
-17.614	-9.106	-22.298	-23.051	-30.255	-30.422	-32.879	-19.957	-38.853	-24.787	-34.969	-34.977	-28.213	-25.38	-32.961	-22.445	-31.11	-28.337
-16.191	-8.103	-21.608	-33.638	-40.635	-37.431	-37.981	-21.17	-41.782	-35.127	-41.989	-41.994	-21.44	-14.969	-36.621	-18.603	-37.833	-35.986
-17.228	-8.682	-20.712	-30.05	-39.512	-36.429	-37.96	-19.52	-43.727	-31.559	-42.872	-42.88	-34.488	-18.011	-37.091	-18.078	-37.896	-35.185
-15.756	-8.432	-27.152	-22.529	-26.984	-27.753	-37.172	-25.537	-49.018	-25.765	-33.436	-33.45	-19.599	-24.373	-35.155	-30.888	-29.972	-25.788
-15.577	-8.153	-23.138	-25.261	-33.541	-32.886	-37.841	-21.107	-51.881	-28.177	-42.377	-42.388	-30.665	-26.805	-35.834	-29.011	-35.95	-31.365
-14.708	-7.247	-25.355	-29.273	-37.845	-48.843	-52.967	-25.218	-76.481	-29.311	-73.576	-73.605	-47.169	-37.616	-52.813	-23.036	-53.005	-48.703
-21.915	-11.823	-14.929	-36.202	-29.852	-31.167	-32.006	-14.622	-31.457	-36.638	-35.343	-35.344	-29.369	-21.37	-30.498	-12.484	-33.357	-31.41
-13.071	-6.295	-29.068	-41.268	-54.941	-52.385	-60.415	-29.499	-68.736	-40.875	-65.604	-65.595	-55.963	-43.958	-59.333	-27.205	-62.855	-58.78
-12.91	-6.22	-31.495	-43.788	-48.525	-47.648	-48.742	-31.048	-52.484	-44.838	-53.587	-53.59	-47.397	-24.297	-47.053	-28.841	-48.664	-47.498
-13.681	-6.714	-31.472	-39.37	-47.488	-55.524	-64.526	-32.025	-58.649	-38.403	-58.252	-58.245	-61.891	-4.178	-62.524	-29.524	-64.478	-63.98
-17.77	-9.06	-18.621	-39.54	-36.703	-35.066	-36.364	-18.752	-38.738	-42.162	-40.507	-40.51	-34.128	-16.686	-34.9	-16.255	-37.562	-35.522
-21.619	-11.668	-18.362	-23.22	-30.315	-25.436	-28.661	-17.397	-32.751	-26.857	-29.148	-29.155	-23.156	-24.058	-28.71	-17.279	-27.167	-24.003
-15.021	-7.661	-23.16	-24.998	-34.386	-47.456	-52.323	-21.888	-43.972	-25.868	-47.193	-47.184	-19.518	-35.241	-50.32	-26.834	-52.395	-48.235
-16.042	-8.069	-22.06	-27.456	-38.329	-41.215	-45.039	-20.896	-61.015	-28.4	-56.26	-56.281	-39.224	-14.22	-44.948	-21.014	-44.981	-40.576
-12.233	-6.499	-35.608	-31.293	-31.302	-33.659	-60.975	-34.608	-42.067	-32.291	-47.979	-48.011	-25.606	-28.627	-59.003	-23.453	-39.478	-32.245
-12.299	-6.539	-36.181	-30.284	-30.673	-31.189	-61.535	-35.067	-45.361	-32.335	-40.393	-40.416	-24.197	-28.041	-60.76	-24.35	-35.482	-29.566
-20.499	-10.602	-17.341	-31.737	-36.333	-31.82	-32.494	-16.389	-35.428	-34.397	-35.821	-35.825	-29.763	-18.563	-31.225	-16.06	-33.324	-31.107
-16.058	-8.059	-22.72	-25.973	-34.559	-38.038	-40.066	-21.112	-48.577	-26.872	-45.413	-45.422	-35.938	-30.637	-39.454	-21.251	-39.22	-36.363
-15.403	-7.727	-24.173	-24.467	-32.276	-41.358	-44.894	-22.607	-62.18	-25.123	-53.376	-53.392	-39.248	-32.252	-42.888	-24.024	-43.648	-39.994
-15.48	-7.714	-23.444	-26.817	-35.541	-41.802	-44.423	-22.38	-56.956	-27.42	-52.633	-52.646	-39.77	-3.718	-43.924	-21.76	-43.819	-40.525
-15.19	-7.547	-26.446	-32.423	-41.134	-49.157	-53.088	-26.523	-72.948	-32.542	-70.064	-70.094	-21.524	-4.641	-52.79	-23.675	-53.523	-49.714
-14.197	-6.955	-29.958	-31.553	-37.39	-48.74	-49.372	-29.544	-56.878	-31.431	-55.553	-55.56	-21.673	-4.216	-48.084	-26.636	-48.912	-47.185
-15.847	-7.899	-22.069	-31.132	-39.917	-39.052	-40.119	-21.446	-45.785	-32.249	-45.322	-45.329	-37.172	-18.409	-38.966	-19.266	-39.947	-37.623
-16.401	-8.213	-23.336	-30.969	-39.727	-40.647	-42.099	-22.763	-48.974	-31.848	-47.753	-47.763	-20.156	-14.789	-41.204	-20.1	-41.864	-39.426
-14.99	-7.432	-24.471	-36.463	-46.245	-43.842	-45.765	-24.604	-52.573	-37.521	-53.475	-53.484	-23.136	-36.632	-44.55	-22.044	-46.257	-43.762
-17.202	-8.643	-21.431	-29.275	-36.384	-35.345	-36.029	-20.121	-40.364	-30.489	-39.473	-39.48	-18.945	-29.662	-34.954	-18.114	-35.451	-33.474
-19.071	-10.087	-18.498	-29.011	-38.33	-31.804	-33.737	-17.277	-38.519	-32.085	-37.929	-37.934	-29.564	-28.442	-32.745	-19.033	-34.555	-31.145
-15.675	-7.98	-21.091	-26.567	-37.092	-35.884	-38.547	-19.055	-47.915	-28.447	-44.922	-44.931	-19.941	-28.942	-37.918	-22.316	-38.133	-12.594
-15.619	-8.01	-22.364	-24.776	-34.186	-35.606	-39.229	-20.187	-51.56	-26.755	-45.293	-45.304	-19.792	-28.494	-39.142	-25.249	-38.109	-34.108
-11.865	-6.256	-35.087	-28.749	-31.213	-28.272	-60.623	-34.988	-49.498	-30.578	-32.969	-32.992	-22.466	-30.383	-58.618	-24.646	-31.401	-26.941
-11.553	-5.986	-33.014	-26.326	-29.766	-28.431	-50.534	-32.898	-48.9	-28.033	-31.283	-31.318	-21.445	-35.034	-48.562	-29.397	-31.325	-27.92
-10.863	-5.542	-36.355	-25.213	-28.905	-26.719	-60.246	-35.594	-72.204	-26.256	-28.783	-28.815	-21.086	-33.512	-58.22	-33.08	-28.47	-26.314
-16.596	-8.898	-20.458	-23.176	-26.897	-23.27	-25.06	-18.135	-28.244	-24.615	-25.482	-25.486	-21.041	-19.995	-24.676	-21.738	-22.985	-20.715
-14.503	-7.171	-19.965	-35.028	-41.035	-37.01	-37.317	-19.755	-40.633	-36.893	-42.017	-42.02	-35.17	-14.318	-35.718	-17.923	-37.47	-35.463
-16.495	-8.564	-22.58	-23.338	-30.674	-30.582	-33.461	-20.215	-40.448	-25.652	-35.847	-35.855	-28.36	-25.231	-31.456	-24.917	-31.616	-28.53
-15.45	-7.845	-20.003	-28.568	-39.408	-35.291	-37.155	-18.043	-44.124	-30.709	-43.269	-43.275	-21.361	-28.677	-36.122	-20.717	-37.177	-33.798
-17.858	-9.658	-19.99	-28.498	-43.673	-36.431	-41.911	-19.126	-44.52	-31.457	-47.782	-47.78	-34.172	-31.66	-39.905	-22.584	-42.632	-36.566
-15.117	-7.763	-22.931	-24.716	-33.783	-36.576	-40.985	-20.748	-58.067	-26.893	-48.445	-48.458	-34.382	-28.852	-41.15	-27.697	-39.683	-11.917
-14.733	-7.521	-23.347	-24.627	-33.525	-40.239	-46.278	-21.347	-65.415	-26.521	-61.096	-61.125	-38.07	-30.858	-47.031	-28.641	-44.943	-39.328
-13.58	-6.789	-24.062	-25.027	-32.846	-42.733	-47.295	-22.131	-83.019	-26.778	-62.267	-62.288	-22.474	-31.891	-47.154	-30.912	-46.183	-41.517
-12.837	-6.926	-29.796	-24.525	-27.918	-24.401	-44.114	-28.46	-48.482	-25.742	-26.898	-26.92	-19.311	-29.154	-47.661	-41.225	-26.434	-23.381
-14.19	-7.206	-24.604	-23.96	-31.722	-45.96	-56.24	-22.855	-49.587	-25.425	-57.049	-57.031	-20.89	-33.373	-54.229	-30.939	-54.214	-45.9
-13.065	-6.644	-27.216	-26.444	-30.239	-48.547	-61.152	-25.365	-44.641	-26.852	-50.76	-50.749	-24.613	-1.032	-59.146	-41.045	-59.868	-48.833
-12.903	-6.185	-25.891	-29.272	-38.746	-56.701	-63.902	-26.147	-59.24	-28.962	-59.674	-59.667	-55.282	-15.47	-61.896	-25.094	-65.179	-57.975
-13.679	-6.759	-23.634	-25.743	-34.53	-45.566	-50.001	-22.412	-79.7	-26.717	-71.993	-72.029	-43.47	-33.895	-49.731	-26.424	-49.478	-44.663
-12.44	-6.661	-32.572	-32.403	-33.392	-31.06	-54.969	-31.894	-45.227	-34.857	-40.842	-40.863	-25.149	-28.712	-55.079	-24.789	-36.111	-29.613
-21.756	-12.55	-18.098	-20.203	-23.556	-19.039	-22.451	-15.799	-24.215	-21.335	-20.521	-20.528	-17.173	-19.09	-22.341	-17.788	-19.276	-17.051
-20.707	-11.514	-18.668	-21.811	-25.952	-21.13	-24.753	-16.812	-27.419	-23.673	-23.41	-23.417	-19.06	-20.795	-25.026	-18.221	-21.954	-19.203
-20.32	-10.589	-16.593	-29.527	-32.067	-27.689	-28.317	-15.012	-30.832	-31.379	-31.048	-31.052	-25.562	-17.801	-27.098	-15.142	-28.622	-26.338
-13.219	-6.38	-29.135	-38.57	-49.744	-54.207	-62.277	-29.579	-64.652	-37.994	-62.853	-62.844	-57.307	-3.275	-61.235	-27.192	-64.45	-60.331
-12.763	-6.079	-29.13	-34.983	-44.653	-58.706	-65.43	-29.604	-58.465	-34.11	-57.75	-57.744	-61.156	-12.116	-63.428	-27.23	-66.707	-64.254
-12.948	-6.218	-26.096	-28.248	-36.975	-57.896	-65.819	-26.288	-57.243	-27.936	-58.27	-58.263	-56.411	-14.944	-63.814	-25.66	-66.913	-59.274
-14.271	-7.487	-25.39	-28.194	-33.517	-34.551	-42.486	-23.54	-62.542	-30.526	-48.947	-48.964	-25.518	-27.473	-44.289	-35.969	-39.199	-33.238
-12.552	-6.723	-31.761	-27.575	-30.361	-26.409	-48.968	-31.375	-69.31	-29.145	-30.445	-30.463	-21.341	-28.43	-54.501	-30.713	-29.035	-24.94
-11.804	-6.213	-34.285	-24.125	-27.301	-25.165	-52.883	-33.108	-55.568	-25.255	-22.125	-27.36	-19.46	-30.798	-54.921	-25.534	-26.928	-24.444
-11.036	-5.711	-38.203	-22.785	-26.464	-26.48	-49.206	-35.762	-45.026	-20.785	-20.785	-28.452	-20.269	-32.164	-47.189	-73.589	-27.944	-26.76
-15.048	-7.806	-22.683	-25.804	-35.676	-44.511	-48.17	-21.301	-41.121	-27.288	-44.008	-44.001	-22.473	-34.022	-46.17	-28.072	-47.863	-44.817
-14.033	-7.095	-24.66	-24.089	-31.81	-48.74	-58.28	-23.089	-47.622	-25.265	-52.707	-52.695	-20.85	-34.585	-56.275	-31.68	-58.027	-49.176
-13.714	-6.757	-26.017	-24.144	-31.139	-52.23	-61.467	-25.154	-56.767	-24.342	-62.843	-62.826	-50.203	-36.926	-59.455	-28.104	-59.263	-52.178
-15.318	-7.796	-22.199	-25.438	-35.556	-38.486	-42.631	-20.249	-60.169	-27.112	-52.22	-52.236	-19.735	-30.312	-42.592	-24.62	-41.935	-37.357
-13.51	-6.578	-23.825	-28.288	-38.384	-48.82	-53.011	-23.591	-75.487	-28.592	-77.641	-77.65	-46.9	-12.504	-51.007	-23.648	-53.383	-48.444
-14.236	-6.976	-25.352	-28.307	-36.755	-50.413	-55.437	-25.214	-68.19	-28.234	-74.431	-74.401	-48.67	-13.048	-53.431	-23.633	-55.421	-50.413
-13.961	-6.855	-21.365	-31.254	-43.475	-41.464	-42.898	-20.994	-50.397	-32.424	-51.541	-51.547	-39.502	-32.925	-41.584	-20.353	-43.273	-40.236
-14.04	-6.928	-22.813	-27.073	-37.018	-43.794	-46.865	-21.855	-64.455	-27.915	-60.273	-60.289	-41.733	-33.514	-46.144	-23.365	-46.724	-42.725
-12.59	-6.435	-29.533	-29.106	-30.488	-44.488	-61.879	-27.707	-44.562	-28.755	-54.844	-54.826	-26.872	-31.28	-59.872	-31.288	-54.64	-44.099
-12.768	-6.712	-32.101	-29.894	-30.723	-29.865	-41.627	-30.287	-71.771	-31.963	-37.07	-37.081	-23.947	-25.145	-39.609	-29.813	-32.425	-27.857
-16.749	-8.751	-18.212	-34.989	-42.935	-42.869	-46.445	-17.797	-43.255	-35.378	-44.54	-44.535	-23.059	-15.808	-44.593	-18.919	-33.675	-44.281
-14.352	-7.104	-21.014	-34.072	-51.318	-44.069	-47.146	-21.173	-57.286	-35.153	-60.728	-60.735	-42.552	-14.009	-46.08	-19.797	-48.864	-44.403
-16.113	-8.365	-22.544	-23.858	-31.305	-30.922	-33.867	-20.177	-41.292	-26.365	-36.588	-36.595	-28.698	-25.387	-33.777	-25.498	-32.126	-28.91
-14.789	-7.667	-25.651	-23.134	-29.852	-35.775	-42.592	-23.487	-73.317	-25.645	-48.151	-48.169	-33.548	-28.046	-44.499	-34.619	-39.189	-34.281
-13.918	-7.341	-30.711	-24.667	-27.354	-37.275	-56.279	-29.37	-42.772	-26.505	-62.89	-62.934	-35.07	-28.986	-54.264	-31.335	-44.419	-36.293
-12.292	-6.566	-31.593	-30.291	-30.721	-32.632	-43.798	-32.578	-36.99	-32.714	-43.343	-43.386	-24.154	-33.002	-41.817	-30.068	-39.482	-31.649
-11.694	-6.113	-32.994	-28.214	-31.208	-29.093	-51.043	-33.608	-44.881	-30.114	-33.257	-33.287	-22.431	-33.663	-49.074	-26.644	-32.623	-28.208
-11.499	-5.959	-32.563	-29.026	-31.994	-30.669	-45.935	-33.282	-40.936	-31.146	-35.398	-35.433	-23.23	-35.696	-43.956	-25.152	-34.94	-29.945
-14.442	-7.671	-26.819	-26.853	-29.429	-26.723	-33.809	-24.942	-42.238	-28.825	-31.519	-31.528	-24.598	-23.2	-35.749	-35.703	-28.258	-24.532
-13.155	-6.902	-31.331	-28.697	-29.83	-31.515	-43.109	-29.487	-72.666	-30.152	-40.312	-40.325	-23.923	-25.702	-48.704	-31.317	-34.484	-29.617
-19.251	-10.666	-19.494	-22.869	-27.265	-21.766	-26.165	-17.536	-29.31	-24.557	-24.486	-24.493	-19.753	-21.484	-26.523	-19.932	-22.826	-19.784
-14.642	-7.97	-27.117	-28.595	-31.215	-33.535	-45.989	-26.064	-40.477	-31.136	-48.935	-48.948	-31.464	-29.168	-43.986	-27.201	-41.158	-32.769
-16.008	-8.916	-25.787	-21.402	-24.683	-21.904	-32.892	-23.528	-34.931	-22.867	-23.925	-23.946	-21.625	-24.398	-30.878	-40.202	-23.214	-20.474
-17.468	-9.207	-22.972	-21.91	-28.705	-28.056	-31.672	-20.843	-37.755	-24.268	-32.428	-32.437	-25.828	-23.842	-32.545	-24.81	-29.012	-25.938
-16.781	-8.509	-22.394	-24.485	-32.095	-33.868	-35.591	-20.2	-41.876	-25.695	-38.902	-38.909	-31.706	-27.694	-35.058	-21.358	-34.343	-14.704
-17.581	-8.889	-20.485	-28.032	-36.65	-34.071	-35.455	-18.746	-40.674	-29.58	-39.336	-39.343	-32.004	-28.667	-34.636	-18.268	-35.015	-32.445
-19.95	-10.289	-17.172	-30.67	-34.098	-29.636	-30.42	-15.657	-33.226	-33.094	-33.544	-33.549	-27.592	-17.975	-29.247	-15.387	-28.896	-28.505
-17.653	-9.014	-18.299	-33.537	-39.582	-34.392	-35.765	-17.207	-39.821	-36.132	-40.845	-40.851	-32.546	-16.698	-34.584	-16.387	-36.681	-33.765
-14.239	-7.002	-25.631	-34.663	-46.806	-52.258	-55.193	-26.503	-49.856	-33.886	-49.483	-49.478	-52.996	-13.385	-53.194	-24.027	-53.48	-54.651
-15.859	-8.415	-23.769	-23.701	-28.956	-26.54	-30.782	-21.679	-36.861	-26.935	-30.701	-30.708	-24.326	-22.658	-31.537	-28.488	-27.5	-24.291
-17.711	-9.229	-19.283	-29.136	-42.238	-36.353	-38.524	-18.047	-43.33	-31.295	-44.09	-44.093	-34.21	-31.338	-37.482	-20.053	-39.622	-36.143
-16.327	-8.41	-22.18	-24.917	-35.301	-37.443	-42.69	-20.344	-58.44	-26.692	-51.971	-51.991	-18.671	-30.126	-43.327	-24.357	-41.823	-36.604
-15.149	-7.955	-28.112	-21.73	-26.846	-30.917	-38.64	-26.005	-54.235	-24.517	-37.872	-37.885	-19.459	-25.258	-36.626	-38.075	-32.919	-28.904
-12.034	-6.131	-32.889	-29.445	-29.569	-47.654	-55.621	-31.403	-41.851	-28.279	-49.686	-49.673	-26.987	-32.084	-53.641	-25.95	-61.605	-47.695
-11.928	-6.01	-31.499	-29.327	-29.731	-55.677	-50.937	-29.986	-41.172	-27.743	-45.439	-45.433	-53.497	-34.488	-48.947	-27.521	-57.855	-57.023
-13.747	-6.769	-24.256	-25.601	-33.978	-47.8	-53.079	-23.338	-67.856	-26.15	-79.431	-79.446	-45.745	-35.195	-53.175	-26.006	-52.434	-47.174
-14.506	-7.232	-23.473	-25.13	-33.717	-42.232	-45.741	-21.978	-64.876	-26.051	-56.617	-56.633	-40.119	-32.433	-45.388	-24.8	-44.914	-13.849
-15.334	-7.867	-25.414	-21.71	-28.608	-35.511	-39.602	-23.021	-52.449	-23.333	-43.508	-43.519	-33.296	-28.011	-37.595	-30.315	-37.083	-33.622
-14.091	-7.315	-27.644	-24.225	-28.956	-36.262	-45.691	-25.591	-59.188	-26.562	-51.188	-51.211	-34.025	-28.062	-43.677	-40.964	-40.381	-34.823
-13.712	-7.023	-25.232	-25.936	-32.153	-41.604	-50.925	-23.151	-52.877	-27.887	-69.603	-69.598	-24.593	-30.809	-48.914	-38.769	-48.024	-40.856
-16.653	-8.616	-21.865	-25.358	-36.643	-39.471	-44.853	-20.375	-49.671	-27.073	-52.616	-52.618	-18.746	-31.865	-44.469	-23.926	-45.314	-39.452
-16.554	-8.73	-24.007	-23.073	-31.294	-33.268	-40.622	-22.374	-57.302	-25.83	-44.518	-44.537	-31.052	-27.605	-38.61	-28.483	-37.422	-32.051
-14.984	-7.89	-26.293	-24.518	-30.085	-32.827	-41.34	-24.498	-67.014	-27.254	-43.483	-43.499	-30.606	-26.681	-44.547	-33.052	-36.5	-31.277
-13.661	-7.462	-27.858	-29.031	-30.617	-29.166	-47.337	-27.799	-44.11	-31.848	-36.623	-36.648	-22.568	-30.2	-45.339	-27.555	-34.246	-27.966
-12.778	-6.843	-26.194	-31.59	-33.174	-32.004	-42.405	-26.789	-37.678	-34.821	-40.958	-40.993	-24.612	-33.629	-40.416	-24.497	-39.225	-31.352
-12.523	-6.747	-29.024	-33.107	-33.851	-33.086	-45.68	-29.769	-37.59	-35.91	-46.412	-46.451	-25.83	-32.97	-43.695	-23.138	-41.226	-32.26
-14.52	-7.687	-26.654	-26.032	-30.864	-37.724	-49.576	-25.292	-42.646	-28.457	-57.072	-57.072	-35.517	-29.646	-49.7	-32.434	-46.02	-8.817
-15.236	-8.388	-25.63	-25.989	-29.03	-25.879	-39.391	-24.969	-49.748	-28.459	-30.907	-23.989	-20.113	-26.396	-42.237	-31.204	-28.968	-24.271
-13.612	-7.37	-29.201	-31.045	-32.385	-33.102	-49.835	-28.126	-42.012	-33.118	-49.08	-49.11	-25.509	-28.785	-47.819	-26.76	-40.203	-32.041
-13.144	-7.016	-29.81	-31.27	-32.329	-36.953	-53.039	-28.691	-40.049	-32.239	-60.028	-60.026	-34.823	-29.465	-51.033	-26.579	-46.228	-36.237
-22.527	-12.11	-15.141	-27.936	-29.405	-26.09	-26.319	-14.211	-28.039	-29.399	-28.415	-28.416	-23.897	-17.132	-24.861	-11.821	-26.54	-24.737
-23.915	-12.61	-15.749	-26.205	-30.281	-25.615	-26.193	-14.708	-28.355	-28.428	-27.996	-28	-23.384	-23.781	-25.015	-14.34	-26.184	-24.198
-20.386	-10.603	-16.916	-32.502	-34.052	-31.831	-32.191	-16.301	-34.119	-34.649	-34.89	-34.891	-29.865	-18.914	-30.734	-15.685	-32.698	-31.027
-15.316	-7.627	-23.017	-30.293	-42.163	-47.375	-52.287	-22.956	-58.538	-30.657	-59.999	-59.985	-19.696	-37.155	-50.281	-21.251	-53.646	-48.366
-14.331	-7.054	-26.303	-29.378	-37.531	-55.656	-51.517	-27.011	-45.094	-28.423	-45.938	-45.934	-55.028	-17.192	-49.52	-24.87	-50.885	-53.065
-13.968	-6.809	-26.083	-31.423	-40.841	-51.76	-56.605	-26.284	-69.963	-31.253	-71.624	-71.602	-50.578	-18.055	-56.295	-23.929	-57.385	-52.561
-19.962	-10.42	-16.949	-32.7	-34.188	-32.188	-32.584	-16.329	-34.281	-34.706	-35.113	-35.114	-30.212	-18.552	-31.069	-15.961	-30.828	-31.387
-15.795	-7.998	-19.898	-33.747	-48.527	-42.863	-44.561	-19.952	-47.303	-34.592	-46.804	-46.799	-21.236	-17.853	-43.191	-19.112	-45.776	-43.26
-15.963	-8.506	-22.308	-26.592	-36.424	-38.235	-42.582	-21.122	-39.741	-29.372	-43.509	-43.5	-24.456	-31.455	-40.58	-26.581	-42.573	-38.143
-15.016	-9.652	-30.244	-16.383	-18.44	-18.6	-38.052	-28.574	-28.962	-18.79	-21.812	-14.383	-13.946	-26.356	-36.033	-32.022	-20.133	-19.824
-16.877	-8.728	-20.861	-27.086	-39.978	-40.803	-43.473	-19.789	-42.375	-28.474	-43.928	-43.921	-19.163	-33.932	-41.885	-22.173	-43.502	-40.657
-15.628	-8.122	-23.072	-24.548	-33.824	-36.345	-42.449	-21.137	-61.172	-26.975	-51.125	-51.145	-34.147	-29.008	-43.466	-27.183	-40.82	-35.309
-16.01	-8.065	-21.34	-27.805	-39.224	-39.164	-42.131	-19.979	-53.563	-29.028	-50.695	-50.709	-37.128	-14.277	-41.646	-20.492	-42.099	-38.204
-17.033	-8.71	-21.512	-25.978	-37.101	-37.218	-41.345	-19.799	-54.526	-27.479	-49.264	-49.281	-35.105	-30.482	-41.577	-21.722	-40.942	-36.382
-15.318	-7.727	-23.114	-25.342	-34.707	-43.972	-50.376	-21.747	-58.484	-26.18	-65.229	-65.242	-17.872	-33.624	-48.367	-24.215	-49.717	-43.686
-16.356	-8.56	-23.311	-23.5	-31.628	-32.079	-36.921	-21.291	-48.932	-26.161	-40.093	-40.104	-29.859	-26.467	-37.857	-27.403	-34.616	-11.267
-18.663	-10.088	-20.129	-23.259	-29.564	-24.507	-27.675	-18.495	-31.819	-26.212	-28.006	-28.013	-22.307	-22.273	-27.922	-20.482	-25.588	-22.525
-16.887	-9.163	-24.142	-23.503	-29.119	-26.661	-35.17	-22.67	-44.57	-27.49	-32.348	-32.361	-24.605	-24.81	-37.939	-26.455	-29.47	-24.964
-16.961	-8.651	-21.193	-25.565	-34.287	-33.373	-35.497	-19.056	-42.242	-27.26	-39.421	-39.429	-17.381	-27.581	-34.983	-20.852	-34.625	-31.623
-15.262	-7.745	-23.028	-23.984	-32.227	-35.745	-38.33	-20.764	-47.703	-25.568	-43.152	-43.16	-33.561	-28.391	-37.871	-25.212	-37.033	-33.878
-20.346	-10.782	-15.016	-32.343	-28.432	-28.655	-28.388	-14.321	-29.146	-32.488	-30.824	-30.825	-26.759	-20.295	-26.722	-13.367	-29.254	-27.752
-15.779	-8.811	-25.578	-16.767	-19.286	-17.839	-27.312	-23.075	-24.739	-17.422	-18.785	-18.813	-18.498	-20.418	-25.299	-24.116	-17.735	-16.525
-15.878	-8.703	-26.609	-22.828	-25.897	-24.029	-35.295	-24.845	-40.3	-24.968	-27.605	-27.619	-22.353	-23.917	-40.664	-32.743	-25.773	-22.077
-14.218	-7.642	-30.365	-26.386	-28.314	-29.991	-47.165	-29.043	-53.703	-28.77	-38.447	-38.466	-27.978	-26.403	-54.059	-30.521	-33.84	-28.319
-15.449	-7.899	-23.527	-23.796	-32.452	-39.21	-44.837	-21.557	-68.877	-25.321	-55.418	-55.442	-18.417	-30.59	-45.786	-26.862	-43.195	-12.053
-15.428	-7.708	-22.817	-28.284	-39.098	-46.177	-51.532	-22.291	-59.029	-28.765	-62.305	-62.288	-44.403	-16.073	-51.532	-21.64	-52.247	-46.561
-14.26	-7.635	-28.277	-28.147	-30.593	-30.078	-42.284	-26.832	-62.401	-30.651	-38.787	-38.802	-23.138	-26.003	-47.654	-30.631	-33.862	-28.414
-14.238	-7.733	-26.819	-21.695	-23.969	-20.961	-30.122	-24.931	-31.39	-22.51	-22.847	-22.858	-16.666	-21.195	-32.772	-38.15	-21.286	-18.72
-13.11	-6.315	-23.857	-44.347	-46.007	-43.118	-44.878	-24.199	-46.93	-46.6	-52.579	-52.583	-42.641	-21.578	-43.229	-22.052	-45.84	-43.577
-16.441	-8.505	-22.32	-23.789	-31.569	-31.471	-34.284	-19.979	-41.661	-26.012	-37.217	-37.225	-29.257	-25.871	-34.172	-24.394	-32.679	-29.51
-15.631	-7.857	-21.286	-30.769	-46.15	-45.32	-48.477	-21.079	-51.477	-31.44	-51.77	-51.761	-19.89	-14.52	-46.474	-20.334	-49.815	-46.317
-16.714	-8.508	-18.989	-34.376	-45.392	-38.512	-40.661	-18.437	-45.695	-36.425	-47.326	-47.33	-36.824	-15.942	-39.459	-17.6	-42.383	-38.796
-15.284	-7.606	-24.155	-29.81	-40.004	-50.741	-55.148	-24.292	-52.199	-29.759	-53.773	-53.762	-49.633	-13.983	-53.145	-22.29	-56.154	-52.518
-17.025	-9.033	-23.407	-22.683	-29.667	-28.499	-33.547	-21.6	-41.804	-25.704	-34.135	-34.146	-26.284	-24.473	-31.538	-26.685	-30.399	-26.62
-16.487	-8.592	-23.475	-23.163	-31.783	-34.218	-39.83	-21.533	-56.958	-25.362	-44.581	-44.598	-32.01	-27.918	-37.821	-26.304	-37.531	-11.936
-14.52	-7.687	-26.654	-26.032	-30.864	-37.724	-49.576	-25.292	-42.646	-28.457	-57.072	-57.072	-35.517	-29.646	-49.7	-32.434	-46.02	-8.817
-13.119	-6.913	-32.552	-27.07	-27.958	-39.652	-54.125	-31.433	-39.443	-27.625	-58.485	-58.437	-24.605	-29.97	-52.154	-27.035	-49.436	-7.029
-12.5	-6.632	-35.141	-29.381	-29.084	-36.923	-53.563	-34.236	-39.384	-29.838	-66.01	-66.083	-25.612	-29.367	-51.598	-23.717	-45.058	-35.87
-12.738	-6.757	-33.918	-29.317	-29.29	-35.939	-59.123	-32.838	-41.036	-29.98	-58.855	-58.918	-25.389	-28.774	-57.152	-25.266	-43.069	-34.766
-12.289	-6.537	-36.599	-29.427	-28.86	-35.932	-50.471	-36.246	-38.849	-29.942	-58.699	-58.778	-25.153	-29.543	-48.504	-22.751	-43.476	-34.759
-16.357	-8.394	-21.177	-27.061	-40.014	-41.944	-45.545	-19.953	-46.944	-28.407	-49.118	-49.109	-19.123	-33.758	-44.758	-22.458	-46.481	-42.334
-15.132	-7.574	-22.349	-27.478	-38.507	-44.904	-50.226	-21.474	-60.97	-28.189	-64.203	-64.201	-42.969	-13.541	-50.301	-22.228	-50.66	-44.898
-15.363	-7.734	-21.306	-27.677	-39.719	-40.268	-43.726	-19.92	-58.144	-28.972	-54.965	-54.981	-19.296	-31.928	-43.257	-21.394	-43.879	-39.451
-15.404	-7.995	-22.32	-25.881	-36.109	-36.204	-41.44	-20.327	-58.923	-28.466	-50.577	-50.593	-34.009	-28.903	-41.797	-27.289	-40.541	-11.817
-14.874	-8.021	-26.778	-27.716	-30.336	-28.019	-38.574	-25.341	-55.129	-30.234	-34.749	-34.761	-21.955	-25.28	-36.558	-29.74	-31.186	-26.271
-12.389	-6.585	-29.787	-27.566	-31.032	-27.971	-50.491	-29.69	-49.023	-29.489	-31.895	-31.923	-21.763	-32.88	-48.496	-29.322	-31.54	-27.122
-14.012	-7.382	-27.199	-28.566	-31.964	-33.469	-43.312	-25.479	-59.175	-30.421	-46.305	-46.323	-24.954	-26.933	-46.667	-35.445	-37.906	-32.005
-13.027	-7.026	-31.491	-28.221	-30.26	-28.166	-53.068	-31.369	-50.421	-30.462	-34.04	-34.06	-21.998	-28.611	-51.038	-28.284	-31.798	-26.665
-12.569	-6.738	-31.532	-29.168	-31.877	-27.876	-52.298	-31.323	-53.154	-31.133	-33.168	-33.187	-22.5	-29.188	-50.272	-28.136	-31.33	-26.448
-13.539	-7.369	-29.026	-29.176	-30.679	-29.088	-49.371	-28.954	-46.43	-31.828	-36.605	-36.626	-22.716	-29.042	-47.362	-27.768	-33.777	-27.732
-19.498	-11.827	-20.858	-16.342	-19.086	-16.878	-22.04	-18.577	-22.156	-17.646	-17.662	-17.676	-15.666	-17.051	-23.704	-20.651	-16.518	-14.814
-22.04	-12.388	-18.466	-20.435	-24.43	-20.693	-24.111	-16.386	-26.35	-22.4	-22.522	-22.53	-18.603	-20.226	-24.281	-17.328	-21.162	-18.743
-14.395	-7.5	-23.58	-28.019	-36.025	-37.201	-44.162	-21.629	-58.801	-30.696	-57.21	-57.23	-25.931	-28.999	-42.154	-33.144	-42.834	-9.973
-13.503	-6.823	-26.867	-23.012	-29.005	-55.359	-54.604	-25.439	-43.157	-24.034	-46.847	-46.84	-21.136	-1.716	-52.613	-38.673	-57.351	-56.526
-20.099	-11.006	-20.496	-21.383	-28.015	-23.94	-29.338	-18.986	-33.63	-24.983	-27.614	-27.626	-21.848	-23.407	-27.329	-19.933	-25.765	-22.21
-12.621	-6.081	-28.99	-54.108	-44.932	-42.584	-50.197	-29.289	-43.475	-52.108	-52.108	-52.108	-34.313	-11.055	-48.33	-27.316	-38.83	-50.204
-14.481	-7.696	-28.378	-26.148	-28.159	-27.872	-37.086	-26.611	-49.39	-28.279	-33.5	-33.511	-25.752	-24.085	-40.965	-35.361	-29.871	-25.789
-12.966	-6.475	-26.916	-24.18	-29.416	-47.572	-57.368	-24.956	-56.267	-25.597	-68.717	-68.686	-22.768	-1.329	-55.355	-44.7	-53.559	-46.841
-11.09	-5.056	-30.591	-47.034	-46.945	-47.303	-48.243	-31.975	-29.058	-45.034	-45.034	-45.034	-49.332	-24.155	-46.244	-29.982	-46.527	-47.443
-15.411	-8.912	-28.994	-16.746	-18.979	-18.425	-30.951	-27.397	-27.102	-18.376	-20.05	-20.076	-18.476	-19.767	-28.936	-29.351	-18.69	-17.324
-12.331	-6.596	-32.825	-31.684	-31.488	-39.761	-45.222	-32.417	-35.486	-31.402	-51.009	-50.979	-27.876	-31.322	-43.238	-22.05	-52.167	-39.438
-19.214	-10.205	-20.006	-24.841	-34.239	-28.241	-31.764	-18.542	-37.898	-27.858	-33.978	-33.987	-18.8	-25.349	-31.924	-20.503	-30.685	-26.836
-13.53	-6.665	-25.15	-46.092	-38.526	-38.869	-45.564	-26.025	-37.881	-44.092	-44.092	-44.092	-34.032	-29.095	-43.704	-24.09	-35.58	-46.106
-15.992	-8.874	-23.779	-26.173	-29.836	-31.061	-39.839	-23.852	-38.459	-29.63	-40.596	-40.611	-29.072	-29.237	-37.84	-24.043	-36.58	-30.292
-15.75	-7.873	-21.62	-33.419	-46.514	-42.029	-44.694	-21.527	-53.669	-34.63	-54.543	-54.557	-40.561	-34.802	-43.814	-19.37	-45.664	-42.067
-10.03	-4.627	-129.12	-70.549	-62.024	-138.777	-121.566	-128.136	-112.148	-69.66	-159.259	-158.644	-123.794	-64.519	-113.767	-205.989	-130.557	-126.829
-16.184	-8.222	-19.477	-30.677	-44.301	-37.3	-39.729	-18.139	-47.446	-32.62	-47.877	-47.887	-20.253	-30.924	-38.82	-18.898	-40.582	-36.615
-15.643	-8.133	-21.922	-26.147	-36.273	-34.406	-38.672	-19.861	-52.026	-28.852	-45.285	-45.296	-32.205	-27.874	-36.666	-26.245	-37.806	-11.97
-13.775	-6.77	-23.805	-26.387	-35.379	-47.093	-51.57	-23.019	-75.529	-26.935	-77.232	-77.264	-45.056	-35.06	-51.314	-24.849	-51.28	-46.401
-13.516	-7.142	-29.738	-28.915	-30.557	-34.111	-49.118	-28.225	-48.872	-30.22	-49.174	-49.199	-25.024	-27.431	-55.146	-31.019	-39.342	-32.719
-23.774	-12.43	-15.716	-26.689	-29.825	-25.159	-25.575	-14.511	-27.791	-28.215	-27.436	-27.439	-22.908	-23.445	-24.448	-14.088	-25.694	-23.744
-11.128	-5.117	-31.288	-44.54	-42.017	-41.453	-52.975	-31.565	-38.24	-42.54	-42.54	-42.54	-41.95	-31.379	-50.975	-29.636	-35.906	-53.913
-16.975	-8.792	-18.987	-29.376	-39.921	-32.74	-34.882	-17.084	-40.931	-32.182	-40.377	-40.384	-21.264	-27.756	-32.879	-19.59	-35.302	-31.564
-15.808	-8.028	-23.615	-24.241	-32.884	-41.839	-48.07	-21.978	-62.367	-25.184	-62.659	-62.69	-16.921	-32.449	-49.387	-24.86	-46.635	-41.179
-14.531	-7.189	-23.996	-40.826	-55.219	-46.385	-51.112	-24.778	-57.113	-41.582	-58.991	-58.99	-47.498	-13.654	-49.762	-22.395	-53.222	-50.087
-12.01	-5.677	-28.564	-49.745	-43.783	-43.681	-53.112	-29.696	-40.573	-47.745	-47.745	-47.745	-34.317	-27.207	-51.112	-27.736	-43.053	-52.207
-12.562	-6.211	-28.121	-24.318	-28.626	-55.066	-71.05	-26.509	-51.857	-25.115	-56.478	-56.47	-52.942	-1.227	-69.044	-46.144	-66.012	-55.285
-12.81	-6.102	-29.317	-31.179	-38.934	-63.105	-65.16	-29.807	-54.275	-30.223	-54.698	-54.694	-64.257	-17.676	-63.164	-27.497	-64.256	-66.178
-13.205	-6.856	-28.993	-28.698	-30.742	-35.705	-46.313	-27.024	-56.21	-29.94	-51.101	-51.122	-25.742	-27.569	-44.297	-34.351	-40.099	-34.214
-13.319	-6.86	-28.403	-26.389	-29.561	-40.609	-54.686	-26.458	-48.382	-27.617	-71.85	-71.835	-24.813	-29.966	-52.664	-36.153	-47.327	-8.819
-12.373	-6.297	-30.138	-29.246	-30.233	-47.532	-60.117	-28.401	-43.07	-28.386	-50.428	-50.417	-26.837	-32.284	-58.137	-30.195	-60.335	-47.592
-13.703	-6.914	-24.484	-24.923	-32.589	-49.526	-58.586	-22.889	-47.26	-26.166	-51.529	-51.519	-22.483	-34.698	-56.582	-32.827	-58.856	-50.095
-18.519	-9.563	-19.246	-28.328	-39.88	-32.991	-35.545	-17.651	-41.871	-30.769	-40.627	-40.636	-30.858	-28.634	-34.977	-18.961	-35.966	-32.129
-16.887	-8.553	-20.022	-30.594	-43.593	-37.852	-40.385	-18.922	-48.262	-32.267	-47.992	-48.003	-19.322	-15.463	-39.656	-18.482	-41.118	-37.331
-16.959	-8.916	-22.591	-23.977	-32.97	-32.07	-37.264	-20.822	-49.786	-26.743	-40.931	-40.944	-29.856	-26.913	-38.295	-25.686	-35.283	-11.802
-14.12	-7.067	-23.112	-26.034	-35.68	-48.952	-56.434	-21.989	-50.595	-26.798	-53.723	-53.712	-46.948	-35.386	-54.429	-25.82	-57.223	-49.553
-14.368	-7.216	-23.76	-25.012	-33.757	-49.116	-57.06	-22.561	-49.38	-25.686	-53.433	-53.421	-47.098	-35.443	-55.055	-27.073	-57.45	-49.725
-11.901	-5.541	-31.217	-39.115	-50.07	-58.475	-63.892	-31.753	-29.713	-37.827	-55.107	-55.104	-63.954	-21.062	-61.894	-29.524	-62.217	-64.011
-12.535	-5.933	-29.175	-31.927	-40.389	-62.857	-65.491	-29.676	-27.596	-30.982	-54.779	-54.775	-64.208	-12.024	-63.495	-27.451	-64.34	-66.138
-11.553	-5.438	-32.969	-45.103	-44.789	-42.822	-48.517	-34.659	-40.931	-43.103	-43.103	-43.103	-39.489	-48.745	-46.488	-32.709	-39.804	-47.034
-11.103	-5.117	-37.181	-55.621	-57.805	-49.47	-58.456	-38.113	-50.853	-53.621	-53.621	-53.621	-37.74	-29.509	-56.458	-36.096	-46.736	-57.46
-13.199	-6.708	-29.425	-22.818	-26.938	-55.513	-52.256	-27.952	-41.908	-23.625	-46.283	-46.276	-21.467	-1.445	-50.267	-37.72	-57.565	-56.778
-13.656	-6.743	-26.578	-23.478	-30.095	-53.137	-64.105	-25.604	-55.124	-23.721	-60.876	-60.861	-51.096	-37.054	-66.409	-30.066	-60.943	-53.191
-13.955	-7.284	-28.521	-24.362	-28.462	-42.365	-55.694	-27.093	-40.958	-25.987	-52.13	-52.107	-40.155	-31.19	-53.689	-34.158	-52.575	-9.209
-22.61	-12.107	-18.632	-22.447	-29.035	-24.392	-26.869	-17.135	-30.193	-24.992	-27.313	-27.321	-22.136	-22.774	-27.238	-16.181	-25.277	-22.622
-22.718	-12.204	-14.305	-26.641	-26.427	-23.97	-23.714	-13.027	-25.132	-27.102	-25.573	-25.575	-21.779	-18.503	-22.233	-12.474	-23.983	-22.489
-22.657	-12.039	-14.703	-27.07	-27.175	-24.475	-24.331	-13.388	-25.855	-27.759	-26.231	-26.233	-22.301	-18.792	-22.905	-12.808	-24.574	-23.018
-13.508	-6.627	-23.691	-45.688	-37.1	-38.348	-43.262	-24.506	-36.537	-43.688	-43.688	-43.688	-41.814	-27.704	-41.402	-22.565	-36.262	-43.402
-13.508	-6.627	-23.691	-45.688	-37.1	-38.348	-43.262	-24.506	-36.537	-43.688	-43.688	-43.688	-41.814	-27.704	-41.402	-22.565	-36.262	-43.402
-12.977	-6.272	-23.648	-58.369	-41.062	-42.759	-47.834	-24.507	-40.012	-59.09	-56.277	-56.277	-45.426	-12.595	-46.079	-22.468	-50.419	-47.701
-16.281	-8.537	-22.58	-24.818	-34.773	-35.186	-41.458	-20.882	-55.474	-27.458	-49.075	-49.093	-21.12	-28.791	-39.449	-26.675	-40.099	-11.538
-11.739	-6.111	-34.744	-24.815	-27.713	-28.146	-47.517	-34.41	-48.777	-26.62	-30.812	-30.853	-20.19	-34.839	-45.547	-30.409	-30.829	-27.65
-11.077	-5.715	-37.409	-20.478	-23.297	-22.746	-43.653	-35.166	-37.447	-21.244	-24.496	-18.478	-17.097	-28.731	-53.681	-54.021	-23.569	-22.596
-11.02	-5.658	-38.352	-20.21	-23.145	-23.526	-45.209	-36.072	-37.408	-21.324	-18.21	-25.499	-17.322	-30.215	-55.597	-46.732	-24.483	-23.719
-10.435	-5.236	-43.37	-21.087	-23.962	-24.84	-55.761	-41.237	-43.026	-22.245	-19.087	-26.822	-18.163	-31.694	-65.473	-54.977	-25.716	-24.89
-11.527	-6.009	-39.383	-23.013	-25.696	-25.664	-61.063	-38.228	-64.849	-24.366	-27.697	-27.735	-18.701	-31.633	-59.101	-23.489	-27.24	-25.075
-18.596	-10.036	-21.411	-23.289	-31.149	-26.525	-31.913	-19.981	-38.598	-26.719	-31.822	-31.832	-24.346	-24.493	-29.904	-22.255	-29.006	-24.922
-18.794	-9.881	-19.49	-26.392	-36.285	-29.663	-32.507	-17.899	-38.512	-29.294	-35.901	-35.909	-27.45	-26.148	-32.199	-19.161	-32.149	-28.372
-13.508	-6.627	-23.691	-45.688	-37.1	-38.348	-43.262	-24.506	-36.537	-43.688	-43.688	-43.688	-41.814	-27.704	-41.402	-22.565	-36.262	-43.402
-10.16	-4.465	-33.973	-43.515	-43	-42.4	-58.289	-34.402	-38.164	-41.515	-41.515	-41.515	-48.564	-33.026	-56.325	-32.463	-37.08	-59.867
-13.099	-6.32	-22.497	-41.519	-45.013	-42.194	-43.285	-22.852	-45.359	-43.591	-50.775	-50.778	-40.999	-20.062	-41.632	-20.743	-44.137	-41.794
-16.752	-8.858	-21.559	-23.542	-29.94	-26.498	-29.045	-19.327	-33.84	-26.294	-30.152	-30.158	-24.267	-22.549	-28.919	-23.807	-27.055	-24.242
-13.448	-7.061	-28.88	-28.633	-30.899	-37.453	-53.49	-27.36	-44.747	-29.935	-63.802	-63.819	-26.067	-28.875	-55.565	-30.663	-44.748	-7.771
-14.034	-7.345	-27.28	-26.097	-30.431	-38.372	-52.021	-25.656	-45.833	-28.144	-62.761	-62.773	-24.463	-29.404	-50.004	-35.882	-45.676	-37.586
-12.501	-6.65	-31.439	-24.348	-28.317	-27.152	-43.704	-29.387	-55.582	-26.369	-22.348	-22.348	-20.249	-31.023	-41.701	-39.781	-29.549	-26.794
-12.23	-6.442	-34.021	-23.464	-26.574	-26.237	-51.351	-32.596	-66.785	-25.133	-28.45	-28.487	-19.042	-32.612	-49.355	-37.148	-28.462	-25.785
-16.18	-8.393	-22.483	-24.521	-34.272	-35.251	-40.241	-20.514	-56.464	-26.744	-46.911	-46.927	-19.815	-28.571	-40.87	-25.806	-38.887	-34.061
-14.899	-7.704	-23.199	-25.332	-34.626	-40.551	-48.457	-21.377	-51.105	-27.622	-59.734	-59.735	-38.375	-31.129	-49.072	-28.447	-47.567	-40.2
-12.557	-6	-25.066	-39.303	-55.168	-52.049	-55.163	-26.072	-49.209	-38.143	-48.914	-48.911	-53.379	-19.505	-53.072	-23.987	-53.156	-54.54
-13.503	-6.591	-22.602	-29.236	-41.054	-45.651	-48.489	-22.242	-65.302	-29.971	-65.81	-65.828	-43.672	-34.753	-46.485	-22.652	-48.987	-44.851
-13.669	-6.654	-23.34	-30.659	-42.564	-46.65	-49.427	-23.319	-65.233	-31.103	-66.4	-66.419	-44.837	-13.039	-48.46	-22.074	-50.045	-46.115
-13.839	-6.889	-22.388	-26.626	-36.481	-41.086	-43.936	-20.709	-58.273	-28.25	-54.61	-54.62	-38.949	-31.453	-41.932	-25.57	-43.633	-13.097
-14.813	-7.499	-24.26	-23.923	-32.087	-46.32	-55.463	-22.763	-50.771	-24.798	-58.011	-57.991	-18.253	-34.151	-53.453	-27.825	-54.029	-46.37
-13.358	-6.917	-29.349	-26.473	-29.082	-38.013	-51.315	-27.441	-50.273	-27.882	-60.629	-60.673	-24.512	-28.739	-58.19	-34.419	-43.437	-36.776
-12.106	-6.481	-33.938	-31.697	-31.081	-36.856	-44.552	-34.162	-35.724	-32.262	-63.349	-63.383	-26.653	-31.515	-42.57	-21.471	-47.289	-36.075
-11.917	-6.321	-34.297	-30.556	-30.763	-33.181	-44.373	-35.276	-37.237	-32.492	-44.651	-44.695	-24.543	-32.345	-42.394	-32.746	-39.766	-32.068
-14.67	-7.298	-20.393	-33.575	-48.667	-41.671	-44.053	-20.236	-52.533	-35.005	-55.489	-55.499	-39.952	-14.241	-42.909	-19.151	-45.305	-41.402
-16.316	-8.317	-21.721	-25.401	-35.065	-35.532	-38.435	-19.678	-48.091	-27.005	-43.919	-43.93	-17.925	-28.85	-38.133	-22.287	-37.604	-34.032
-13.291	-6.418	-24.266	-32.068	-44.638	-49.221	-52.556	-24.491	-71.821	-32.25	-75.027	-75.036	-47.657	-37.642	-50.552	-22.766	-53.597	-49.265
-13.855	-7.221	-25.753	-28.124	-33.165	-39.416	-50.679	-24	-47.172	-29.897	-61.669	-61.644	-26.289	-29.859	-51.903	-36.108	-47.212	-38.811
-13.265	-7.05	-30.526	-29.736	-31.026	-29.352	-41.839	-28.947	-73.299	-31.943	-36.676	-36.688	-23.573	-25.45	-39.82	-30.812	-32.348	-27.462
-14.057	-7.215	-25.457	-24.3	-30.956	-41.071	-50.429	-23.401	-53.35	-26.509	-69.082	-69.091	-22.808	-30.693	-48.417	-35.781	-47.049	-40.247
-14.399	-7.383	-22.681	-26.64	-35.967	-37.46	-41.921	-20.466	-61.425	-29.136	-51.869	-51.883	-24.395	-29.116	-39.915	-29.583	-41.126	-36.193
-15.407	-8.18	-24.146	-24.976	-29.413	-26.344	-30.874	-22.086	-37.135	-27.681	-30.558	-30.565	-24.143	-22.551	-28.867	-31.056	-27.377	-24.086
-15.675	-7.98	-21.091	-26.567	-37.092	-35.884	-38.547	-19.055	-47.915	-28.447	-44.922	-44.931	-19.941	-28.942	-37.918	-22.316	-38.133	-12.594
-14.189	-6.994	-27.28	-41.303	-52.809	-47.73	-52.253	-27.623	-61.936	-42.065	-65.259	-65.274	-48.929	-4.221	-51.088	-25.239	-53.598	-50.617
-25.135	-13.928	-16.06	-22.096	-25.967	-21.787	-22.659	-14.185	-24.667	-23.435	-23.196	-23.201	-19.492	-20.411	-22.231	-12.948	-21.694	-19.94
-11.032	-5.133	-37.194	-48.599	-49.651	-44.951	-61.462	-38.067	-44.339	-46.599	-46.599	-46.599	-47.187	-2.723	-59.463	-36.101	-40.37	-59.86
-19.724	-10.471	-13.881	-29.629	-24.637	-26.224	-25.794	-13.385	-24.937	-27.575	-27.591	-27.59	-24.756	-19.665	-23.959	-11.451	-25.079	-25.557
-10.911	-5.076	-41.451	-52.354	-54.77	-48.804	-54.549	-43.034	-49.366	-50.354	-50.354	-50.354	-44.131	-33.665	-52.553	-41.035	-45.693	-53.297
-13.741	-6.727	-23.736	-48.507	-47.16	-44.565	-49.444	-24.598	-49.562	-50.3	-57.914	-57.917	-46.445	-22.93	-47.885	-22.417	-51.908	-48.889
-13.201	-6.382	-25.375	-50.05	-45.147	-42.767	-45.749	-25.687	-45.971	-52.667	-52.637	-52.639	-43.816	-24.068	-44.042	-23.602	-46.785	-44.832
-18.155	-9.535	-19.231	-24.906	-31.093	-26.453	-27.907	-17.1	-31.62	-27.234	-29.788	-29.793	-18.455	-22.908	-27.183	-19.263	-26.922	-24.372
-11.181	-5.768	-39.714	-27.728	-30.108	-28.361	-57.239	-40.211	-49.337	-29.402	-32.044	-32.071	-22.069	-31.668	-55.3	-36.198	-30.885	-27.222
-13.37	-7.111	-31.669	-28.779	-29.738	-31.142	-47.626	-30.223	-53.433	-30.42	-40.599	-40.616	-23.564	-26.397	-57.226	-29.365	-34.974	-29.419
-12.92	-6.998	-30.882	-31.252	-31.487	-33.339	-49.016	-31.036	-38.339	-32.993	-48.999	-49.041	-25.196	-30.439	-47.038	-23.891	-41.025	-32.317
-12.164	-6.45	-32.11	-29.049	-30.268	-31.145	-44.539	-32.986	-38.712	-31.486	-38.367	-38.403	-23.055	-33.413	-42.561	-23.443	-36.465	-30.14
-14.052	-7.184	-23.699	-26.134	-32.931	-34.123	-37.096	-21.166	-47.107	-28.53	-41.818	-41.825	-23.896	-26.77	-35.092	-32.997	-35.653	-32.163
-14.55	-8.203	-35.106	-19.586	-22.022	-22.352	-36.864	-33.262	-34.57	-22.122	-24.648	-24.678	-16.145	-22.737	-40.602	-37.892	-23.334	-21.464
-14.392	-8.093	-35.604	-19.721	-22.198	-22.555	-37.503	-33.729	-34.914	-22.271	-25.099	-25.129	-16.324	-23.095	-35.484	-37.621	-23.604	-21.918
-13.443	-7.51	-37.942	-21.129	-23.852	-24.134	-39.921	-35.967	-37.445	-23.685	-26.821	-26.866	-18.094	-24.465	-37.904	-19.791	-25.295	-23.804
-13.408	-7.648	-39.024	-22.233	-24.533	-23.482	-39.409	-37.404	-38.421	-25.766	-26.234	-26.256	-19.114	-23.774	-37.397	-46.648	-24.662	-22.579
-13.711	-6.789	-22.991	-42.042	-36.644	-39.32	-43.064	-24.83	-35.362	-40.042	-40.042	-40.042	-42.702	-13.01	-41.056	-22.825	-39.397	-41.786
-13.902	-7.138	-29.025	-21.371	-26.694	-47.363	-61.201	-27.356	-44.037	-23.129	-52.55	-52.532	-19.847	-33.204	-59.217	-41.023	-58.084	-47.448
-12.766	-6.531	-29.353	-28.829	-30.275	-35.357	-42.528	-26.908	-74.355	-29.763	-46.382	-46.393	-25.688	-27.004	-40.518	-35.437	-38.092	-33.538
-14.721	-7.374	-23.225	-24.876	-33.497	-40.29	-43.409	-21.482	-57.907	-25.993	-51.821	-51.833	-38.155	-31.287	-41.405	-24.743	-42.489	-38.832
-14.577	-7.245	-23.907	-25.351	-33.696	-43.964	-47.848	-22.696	-73.524	-25.964	-61.176	-61.198	-41.885	-33.589	-47.674	-24.34	-47.03	-42.89
-19.42	-10.219	-20.654	-23.248	-31.273	-27.493	-30.322	-18.871	-35.304	-25.471	-31.714	-31.723	-16.202	-24.2	-30.66	-20.445	-28.702	-25.662
-17.268	-8.759	-18.874	-37.095	-37.584	-34.832	-35.795	-18.644	-38.483	-39.414	-39.867	-39.871	-33.504	-16.344	-34.366	-16.235	-36.49	-34.442
-12.221	-6.051	-30.704	-36.297	-36.436	-35.337	-44.15	-31.958	-33.589	-34.297	-34.297	-34.297	-44.857	-3.99	-42.202	-30.053	-31.337	-44.602
-13.083	-6.55	-28.608	-38.24	-36.905	-36.054	-45.975	-29.67	-34.764	-36.24	-36.24	-36.24	-44.615	-37.562	-44.016	-27.781	-31	-47.545
-14.408	-7.293	-25.755	-22.845	-29.89	-51.358	-59.297	-24.405	-45.548	-23.487	-50.298	-50.287	-49.301	-35.879	-57.299	-30.343	-59.078	-52.293
-12.909	-6.508	-28.174	-24.584	-28.447	-58.141	-51.165	-26.732	-41.857	-24.748	-45.051	-45.046	-56.028	-36.934	-49.173	-40.234	-54.69	-58.296
-12.853	-6.538	-29.42	-26.572	-28.754	-38.681	-47.018	-27.019	-66.042	-27.687	-54.474	-54.493	-24.726	-28.796	-49.406	-37.542	-42.168	-37.116
-14.12	-7.183	-26.579	-22.033	-28.363	-39.994	-46.044	-24.307	-86.416	-23.963	-54.671	-54.69	-19.729	-30.226	-44.036	-37.243	-42.993	-38.509
-14.327	-7.235	-25.878	-22.349	-29.152	-42.501	-48.422	-23.883	-73.362	-23.58	-61	-61.028	-18.153	-31.908	-46.414	-31.94	-45.896	-41.244
-12.983	-6.22	-27.15	-37.461	-51.326	-52.299	-57.698	-27.545	-71.134	-37.25	-69.149	-69.137	-52.873	-41.48	-56.743	-25.245	-59.667	-55.187
-14.93	-7.96	-27.987	-23.98	-26.253	-25.778	-34.209	-26.111	-41.081	-25.939	-29.802	-29.812	-23.696	-22.796	-37.944	-36.787	-26.947	-23.495
-18.809	-9.972	-21.248	-23.611	-32.557	-28.871	-33.231	-19.728	-40.721	-26.476	-35.033	-35.044	-26.65	-25.554	-31.223	-22.142	-31.4	-27.399
-18.036	-9.313	-17.699	-29.332	-34.538	-29.427	-30.207	-15.703	-33.378	-31.52	-33.429	-33.433	-27.312	-25.621	-28.968	-16.546	-30.261	-27.801
-12.278	-5.941	-33.878	-55.856	-52.054	-45.27	-60.299	-34.456	-48.296	-53.856	-53.856	-53.856	-59.027	-10.138	-58.328	-32.458	-40.538	-61.187
-12.616	-6.485	-51.231	-67.51	-58.644	-60.882	-73.118	-50.392	-79.187	-68.267	-80.069	-80.072	-43.883	-5.177	-71.879	-48.225	-54.206	-72.826
-15.209	-7.592	-20.584	-41.176	-41.181	-38.607	-40.143	-21.005	-43.348	-43.751	-45.906	-45.91	-24.202	-14.603	-38.606	-18.687	-41.119	-38.84
-15.591	-8	-23.626	-23.497	-31.982	-37.644	-42.864	-21.554	-65.871	-25.179	-50.77	-50.789	-35.462	-29.654	-43.729	-26.862	-41.045	-36.382
-13.896	-7.215	-28.647	-24.299	-28.329	-36.896	-48.195	-26.677	-53.992	-26.449	-54.004	-54.034	-34.658	-28.338	-46.177	-40.869	-41.475	-35.527
-12.338	-6.233	-30.74	-27.277	-28.288	-56.591	-50.76	-29.237	-41.28	-26.097	-45.35	-45.344	-54.424	-35.186	-48.77	-31.011	-56.886	-57.888
-12.958	-6.592	-30.559	-24.73	-27.158	-40.157	-50.415	-28.231	-59.059	-25.927	-59.419	-59.449	-23.281	-29.576	-54.775	-36.861	-44.09	-8.183
-12.408	-6.336	-30.575	-29.256	-30.12	-45.463	-62.884	-28.85	-43.483	-28.589	-52.807	-52.792	-26.917	-31.538	-60.887	-29.513	-56.832	-45.203
-14.055	-6.865	-25.888	-33.749	-44.482	-49.713	-53.535	-26.135	-71.636	-33.84	-72.554	-72.569	-48.792	-19.316	-52.796	-23.659	-54.477	-50.513
-20.304	-10.366	-19.497	-24.992	-30.906	-27.645	-28.444	-17.28	-31.463	-26.322	-30.107	-30.113	-25.487	-24.04	-27.819	-16.957	-27.438	-25.511
-18.23	-9.352	-21.655	-24.89	-34.103	-33.562	-36.749	-19.727	-45.255	-26.511	-40.76	-40.773	-31.405	-28.193	-37.041	-21.133	-35.677	-32.144
-11.995	-5.836	-37.171	-51.5	-52.547	-45.511	-61.462	-38.089	-47.544	-49.5	-49.5	-49.5	-44.712	-34.203	-59.462	-36.1	-40.919	-59.848
-11.989	-5.647	-28.998	-55.133	-44.718	-43.519	-51.473	-29.272	-42.151	-53.133	-53.133	-53.133	-49.734	-27.419	-49.618	-27.311	-40.761	-51.497
-15.654	-7.901	-23.143	-25.397	-34.695	-43.315	-49.294	-21.788	-60.929	-26.192	-64.219	-64.229	-17.413	-33.479	-50.154	-23.575	-48.57	-42.931
-13.728	-7.05	-27.107	-24.171	-29.38	-42.571	-55.927	-25.145	-48.323	-26.05	-63.793	-63.756	-22.903	-31.136	-53.909	-41.036	-49.947	-41.939
-13.948	-6.982	-25.184	-23.388	-30.599	-44.506	-50.379	-23.418	-68.323	-24.554	-69.917	-69.961	-19.373	-32.975	-51.077	-30.521	-48.46	-12.033
-13.292	-6.756	-27.397	-24.35	-29.098	-50.648	-59.064	-25.669	-43.877	-25.306	-49.261	-49.252	-22.843	-1.336	-57.078	-41.039	-60.534	-51.313
-14.005	-6.833	-28.089	-29.423	-36.57	-58.405	-65.899	-28.331	-56.809	-28.783	-58.94	-58.93	-57.779	-3.42	-63.895	-25.831	-66.772	-60.873
-11.764	-5.647	-41.491	-52.417	-54.017	-51.624	-52.983	-43.141	-51.763	-50.417	-50.689	-50.688	-37.408	-30.258	-50.984	-41.032	-50.062	-52.28
-11.055	-5.324	-103.706	-53.678	-50.046	-129.938	-195.219	-102.788	-185.263	-52.549	-150.184	-148.36	-42.052	-3.605	-72.353	-196.746	-134.226	-104.892
-19.4	-10.126	-15.674	-33.379	-29.967	-29.25	-29.365	-14.641	-30.583	-34.012	-32.195	-32.196	-27.456	-19.16	-27.776	-13.518	-30.191	-28.503
-24.957	-14.463	-15.496	-21.152	-24.758	-20.872	-21.619	-13.435	-23.336	-22.316	-21.974	-21.979	-18.619	-19.537	-21.067	-12.222	-20.527	-18.956
-21.509	-10.959	-17.748	-31.451	-36.074	-31.39	-32.162	-16.728	-34.982	-34.146	-35.176	-35.181	-29.42	-19.173	-31.042	-15.573	-32.89	-30.738
-20.593	-10.741	-18.384	-26.175	-33.874	-27.735	-29.604	-16.847	-33.656	-28.745	-32.027	-32.034	-25.523	-25.036	-29.09	-16.841	-29.252	-26.284
-18.121	-9.433	-15.819	-36.061	-28.73	-30.902	-31.265	-16.344	-29.752	-34.005	-33.798	-33.797	-29.994	-17.75	-29.449	-14.057	-31.544	-31.187
-24.052	-13.613	-16.359	-21.076	-25.361	-21.41	-23.024	-14.586	-25.078	-22.961	-23.02	-23.026	-19.181	-20.306	-22.402	-13.753	-21.533	-19.545
-19.295	-9.828	-19.223	-31.66	-41.753	-35.513	-37.359	-18.239	-42.019	-33.916	-42.101	-42.108	-33.631	-17.341	-36.449	-17.262	-38.415	-35.321
-18.318	-9.313	-19.163	-34.851	-41.412	-36.012	-37.628	-18.575	-41.826	-37.454	-42.702	-42.709	-34.443	-17.056	-36.552	-16.593	-38.738	-35.942
-18.602	-9.469	-18.585	-34.392	-38.211	-34.009	-35.126	-17.777	-38.425	-36.875	-39.234	-39.24	-32.359	-17.385	-33.941	-15.841	-35.878	-33.498
-19.417	-9.842	-20.355	-29.974	-41.386	-36.151	-38.577	-19.216	-45.002	-31.773	-43.876	-43.888	-34.251	-16.997	-38.216	-17.945	-39.133	-35.732
-17.208	-8.746	-19.937	-41.249	-38.263	-36.246	-37.899	-20.335	-40.327	-43.718	-42.136	-42.139	-35.8	-15.746	-36.415	-17.838	-38.941	-37.041
-13.281	-7.216	-30.852	-29.118	-29.326	-34.365	-46.423	-31.049	-36.887	-30.602	-53.445	-53.495	-24.484	-30.433	-44.445	-24.397	-42.891	-33.471
-12.735	-6.823	-27.82	-29.877	-30.607	-32.531	-40.816	-28.555	-35.99	-32.779	-42.299	-42.345	-23.719	-34.301	-38.83	-23.915	-40.004	-31.841
-11.685	-6.11	-35.351	-28.177	-30.125	-30.536	-44.772	-36.195	-40.171	-30.373	-36.093	-36.13	-22.478	-33.474	-42.796	-32.746	-34.652	-29.485
-12.251	-6.551	-34.25	-30.781	-31.012	-32.817	-49.019	-34.441	-38.798	-32.63	-45.025	-45.063	-24.718	-30.64	-47.048	-32.746	-39.189	-31.589
-11.917	-6.321	-34.297	-30.556	-30.763	-33.181	-44.373	-35.276	-37.237	-32.492	-44.651	-44.695	-24.543	-32.345	-42.394	-32.746	-39.766	-32.068
-13.574	-7.384	-29.209	-23.604	-26.852	-24.414	-43.35	-27.481	-48.394	-25.238	-26.929	-26.955	-18.552	-29.139	-41.33	-45.679	-26.577	-23.408
-13.855	-7.487	-29.423	-22.892	-26.319	-24.455	-40.409	-27.194	-45.654	-24.646	-26.589	-26.618	-18.237	-28.476	-38.398	-32.343	-26.42	-23.586
-14.317	-7.797	-29.525	-21.97	-25.397	-23.774	-37.237	-27.084	-40.483	-23.625	-25.56	-25.591	-24.329	-26.814	-35.226	-54.563	-25.266	-22.917
-14.943	-8.239	-27.307	-22.873	-26.101	-24.09	-38.298	-25.244	-43.72	-24.775	-26.717	-26.743	-17.832	-27.295	-36.288	-58.297	-26.231	-22.864
-15.353	-8.445	-27.46	-21.933	-25.272	-22.846	-33.212	-24.965	-36.484	-23.52	-24.863	-24.889	-22.758	-24.621	-33.458	-46.569	-24.323	-21.817
-19.614	-9.999	-20.65	-26.633	-36.719	-33.41	-36.146	-19.012	-43.114	-28.415	-40.225	-40.238	-31.301	-28.895	-36.239	-19.117	-35.74	-32.316
-14.364	-7.342	-31.23	-61.774	-51.494	-43.729	-53.74	-31.691	-53.154	-59.96	-59.774	-59.774	-52.004	-5.715	-51.999	-29.623	-39.184	-54.076
-14.053	-7.027	-29.016	-58.46	-49.839	-43.651	-50.598	-29.384	-52.222	-61.358	-58.045	-58.047	-48.709	-28.123	-48.929	-27.299	-41.331	-50.29
-13.707	-6.862	-31.229	-66.725	-53.114	-44.808	-55.486	-31.684	-54.478	-65.586	-64.271	-64.27	-53.459	-29.49	-53.792	-29.618	-41.096	-55.801
-9.433	-4.263	-90.73	-215.372	-215.573	-209.02	-103.734	-88.942	-159.937	-196.051	-150.506	-150.363	-135.938	-83.568	-102.012	-22.768	-205.089	-193.884
-12.604	-6.055	-31.227	-55.477	-62.234	-48.87	-60.672	-31.689	-62.571	-55.031	-65.404	-65.401	-57.879	-3.335	-59.085	-29.593	-53.751	-60.817
-13.912	-7.044	-25.329	-23.633	-30.78	-49.74	-59.185	-23.734	-46.223	-24.854	-51.239	-51.228	-20.918	-34.772	-57.18	-33.935	-59.07	-50.333
-13.912	-7.044	-25.329	-23.633	-30.78	-49.74	-59.185	-23.734	-46.223	-24.854	-51.239	-51.228	-20.918	-34.772	-57.18	-33.935	-59.07	-50.333
-13.048	-6.835	-30.286	-28.999	-30.307	-40.358	-57.08	-28.937	-40.739	-29.306	-55.853	-55.822	-26.388	-30.086	-55.076	-28.098	-50.426	-7.45
-14.186	-7.16	-22.628	-26.272	-36.342	-44.164	-50.851	-20.964	-57.093	-27.801	-63.606	-63.586	-42.052	-32.923	-48.843	-27.268	-50.707	-43.863
-14.712	-7.374	-25.756	-23.145	-30.038	-45.336	-51.392	-24.249	-67.07	-23.622	-70.202	-70.253	-43.223	-33.927	-52.618	-27.636	-49.225	-44.38
-11.717	-6.003	-38.467	-29.476	-28.727	-36.714	-55.469	-36.557	-54.372	-29.631	-51.523	-51.546	-25.794	-27.77	-77.713	-23.511	-40.649	-6.092
-16.781	-8.509	-22.394	-24.485	-32.095	-33.868	-35.591	-20.2	-41.876	-25.695	-38.902	-38.909	-31.706	-27.694	-35.058	-21.358	-34.343	-14.704
-33.437	-17.693	-14.464	-27.293	-32.014	-24.257	-26.735	-13.375	-29.535	-30.261	-25.293	-28.335	-22.085	-26.478	-26.185	-13.088	-27.593	-24.688
-22.153	-11.712	-16.723	-26.709	-31.844	-25.907	-27.059	-15.452	-30.033	-29.369	-29.183	-29.187	-23.632	-24.096	-26.11	-15.679	-27.162	-24.566
-30.268	-16.623	-14.229	-25.35	-28.466	-23.253	-24.327	-12.963	-26.283	-26.976	-25.612	-25.616	-21.044	-23.307	-23.491	-11.743	-24.401	-22.491
-21.952	-12	-14.148	-35.302	-25.355	-31.478	-35.889	-15.748	-27.386	-33.302	-33.302	-33.302	-33.783	-22.082	-34.24	-13.469	-32.631	-44.284
-25.856	-15.171	-11.936	-30.342	-22.444	-27.302	-28.401	-12.95	-24.161	-28.342	-28.342	-28.342	-26.879	-29.757	-26.712	-11.3	-25.8	-34.24
-14.693	-7.662	-19.673	-30.899	-33.404	-37.677	-33.594	-22.782	-30.444	-28.899	-30.435	-30.434	-25.046	-46.466	-31.595	-22.197	-34.119	-35.839
-23.306	-13.153	-19.437	-23.596	-30.504	-24.051	-31.583	-18.076	-36.448	-26.509	-28.117	-28.132	-22.269	-26.063	-33.813	-20.091	-26.776	-22.744
-20.565	-11.22	-16.497	-35.833	-31.967	-41.911	-39.714	-17.484	-33.439	-33.827	-35.334	-35.331	-42.985	-19.244	-37.717	-17.681	-37.584	-43.154
-24.703	-13.545	-14.447	-49.121	-29.758	-35.387	-39.525	-14.97	-33.179	-55.967	-48.191	-48.191	-34.45	-23.606	-38.514	-14.692	-52.879	-47.98
-25.282	-14.612	-16.689	-25.164	-33.672	-38.055	-37.878	-17.877	-33.117	-28.479	-38.303	-38.284	-35.696	-50.974	-35.889	-17.668	-39.652	-48.903
-19.666	-11.626	-18.318	-23.431	-28.235	-44.615	-30.344	-21.403	-26.683	-23.75	-29.729	-29.72	-42.821	-44.805	-28.35	-19.915	-32.201	-40.891
-27.17	-19.627	-16.831	-22.119	-30.291	-21.622	-26.636	-15.307	-29.347	-27.919	-25.212	-25.226	-19.747	-27.025	-28.44	-14.907	-26.189	-23.543
-13.595	-8.335	-44.432	-20.65	-22.677	-22.956	-71.162	-43.323	-42.673	-23.586	-25.499	-25.532	-17.508	-29.881	-68.955	-37.184	-24.551	-23.455
-23.648	-14.239	-14.621	-25.718	-25.712	-32.091	-26.788	-18.24	-25.267	-23.948	-25.229	-25.225	-30.23	-30.148	-24.79	-18.081	-25.43	-28.24
-22.262	-13.339	-16.036	-25.17	-28.624	-40.82	-30.603	-18.451	-27.52	-25.555	-29.961	-29.952	-38.787	-36.594	-28.608	-17.099	-30.679	-39.082
-32.31	-17.258	-17.057	-24.133	-36.258	-25.753	-33.012	-16.113	-39.241	-32.374	-32.41	-32.427	-23.927	-32.462	-34.073	-16.761	-33.245	-28.137
-34.924	-20.647	-14.204	-27.503	-33.508	-31.366	-33.529	-14.871	-34.304	-33.54	-36.045	-36.036	-29.17	-38.595	-31.336	-13.632	-35.935	-46.004
-31.249	-17.503	-15.153	-26.805	-35.549	-34.027	-37.561	-16.056	-35.419	-31.492	-38.514	-38.499	-31.785	-45.306	-35.564	-15.292	-38.676	-51.233
-30.538	-18.256	-14.128	-26.019	-30.09	-33.181	-31.014	-15.417	-29.823	-28.423	-31.23	-31.222	-30.935	-32.618	-29.018	-13.963	-30.026	-36.126
-25.428	-30.193	-13.126	-26.432	-29.723	-24.237	-25.548	-12.196	-28.099	-35.053	-24.432	-24.432	-21.897	-36.442	-24.944	-10.759	-35.964	-37.907
-18.978	-11.235	-17.494	-26.189	-28.365	-46.414	-30.588	-20.332	-26.982	-25.589	-30.678	-30.668	-24.835	-40.199	-28.593	-18.682	-32.517	-43.641
-34.808	-19.471	-14.142	-28.234	-33.286	-32.538	-34.439	-15.068	-34.633	-33.252	-36.343	-36.334	-30.347	-39.756	-32.44	-13.771	-36.088	-47.293
-29.583	-18.851	-13.181	-27.178	-26.869	-31.614	-28.374	-15.379	-27.666	-27.024	-27.974	-27.969	-29.64	-29.052	-26.377	-13.59	-26.671	-30.194
-25.218	-23.145	-10.707	-28.856	-22.075	-25.569	-24.994	-13.03	-24.163	-26.856	-26.662	-26.66	-23.892	-31.052	-23.412	-11.431	-24.877	-31.021
-30.062	-21.753	-12.358	-28.529	-26.128	-28.771	-27.796	-14.076	-27.544	-28.298	-28.065	-28.062	-26.729	-22.499	-25.797	-12.068	-26.768	-29.261
-34.682	-19.84	-15.999	-24.689	-39.15	-27.108	-33.125	-15.316	-39.016	-33.437	-34.567	-34.585	-25.008	-34.457	-34.109	-14.864	-36.053	-30.756
-24.824	-22.872	-10.162	-26.774	-21.229	-24.819	-24.047	-12.855	-22.558	-24.774	-24.774	-24.774	-22.938	-25.375	-22.117	-11.529	-22.739	-25.766
-24.212	-17.919	-10.536	-25.684	-20.483	-26.094	-24.64	-14.315	-21.59	-23.684	-23.684	-23.684	-24.796	-22.918	-22.56	-13.163	-21.966	-23.904
-23.442	-17.36	-10.482	-24.667	-20.016	-25.321	-23.667	-14.539	-20.838	-22.667	-22.667	-22.667	-24.039	-21.587	-21.582	-13.367	-21.055	-22.647
-18.261	-28.328	-10.612	-22.511	-20.299	-19.753	-19.01	-9.337	-19.594	-21.299	-20.18	-20.18	-17.671	-23.393	-17.748	-7.236	-19.836	-21.499
-13.907	-15.99	-15.483	-17.61	-22.371	-17.051	-19.924	-13.297	-21.004	-22.646	-18.33	-18.343	-14.915	-29.466	-22	-11.867	-28.741	-18.165
-23.966	-17.246	-10.682	-25.384	-20.568	-25.984	-24.306	-14.672	-21.466	-23.384	-23.384	-23.384	-24.716	-21.746	-22.207	-13.53	-21.771	-23.377
-22.426	-19.08	-9.492	-24.131	-18.727	-23.692	-22.988	-13.194	-19.899	-22.131	-22.131	-22.131	-22.466	-23.581	-21.042	-11.608	-16.347	-23.456
-16.75	-21.468	-13.744	-20.64	-25.171	-19.153	-20.538	-11.698	-22.234	-25.166	-20.664	-20.672	-16.864	-32.294	-20.767	-10.047	-29.145	-21.768
-23.784	-20.381	-9.747	-25.817	-19.797	-24.46	-23.734	-12.882	-21.149	-23.817	-23.817	-23.817	-22.913	-25.693	-21.915	-11.438	-21.623	-25.824
-24.103	-19.319	-10.561	-24.842	-20.682	-25.033	-22.869	-14.331	-21.195	-22.842	-22.842	-22.842	-23.403	-20.198	-20.709	-13.096	-20.968	-22.079
-20.362	-23.22	-9.368	-23.704	-18.971	-22.003	-20.937	-11.725	-19.88	-21.704	-21.704	-21.704	-20.297	-23.533	-19.232	-9.976	-19.463	-23.397
-17.289	-21.563	-13.688	-20.746	-25.036	-18.818	-20.281	-11.382	-22.076	-24.783	-20.433	-20.44	-16.477	-33.208	-20.517	-10.057	-28.786	-21.515
-24.952	-22.56	-15.886	-22.201	-29.751	-24.185	-26.911	-14.386	-29.6	-36.78	-28.92	-28.926	-22.242	-30.06	-24.91	-14.022	-33.213	-40.444
-27.732	-29.584	-13.637	-26.885	-32.375	-24.532	-26.93	-12.771	-30.109	-39.815	-29.101	-29.108	-22.3	-42.663	-26.725	-11.442	-43.137	-39.643
-18.275	-22.576	-15.048	-20.632	-25.967	-17.74	-21.199	-12.966	-23.323	-23.813	-20.235	-20.243	-15.755	-34.323	-21.39	-12.663	-30.758	-20.912
-19.123	-29.771	-11.196	-23.197	-22.31	-20.865	-20.48	-10.194	-21.408	-23.578	-21.63	-21.633	-18.611	-25.102	-19.18	-8.246	-22.392	-23.477
-21.929	-15.74	-30.005	-17.854	-21.409	-20.407	-38.567	-27.739	-31.065	-21.544	-22.557	-15.854	-21.925	-31.58	-36.54	-30.43	-22.353	-21.065
-23.528	-26.986	-12.399	-28.615	-27.496	-24.707	-26.023	-11.659	-27.644	-31.077	-28.207	-28.209	-22.328	-30.788	-24.02	-10.408	-30.059	-32.921
-23.554	-24.971	-10.135	-26.274	-21.376	-24.028	-23.242	-12.501	-22.407	-24.274	-24.274	-24.274	-22.042	-24.95	-21.323	-11.086	-22.328	-25.274
-11.785	-11.671	-17.819	-14.922	-19.312	-15.339	-21.201	-15.61	-20.578	-20.736	-16.723	-16.746	-14.108	-28.601	-25.54	-14.384	-26.126	-16.495
-15.715	-7.846	-27.56	-25.288	-31.023	-43.169	-44.584	-26.377	-53.154	-25.301	-49.565	-49.574	-17.18	-4.808	-43.893	-24.108	-43.374	-41.247
-19.135	-9.911	-19.401	-34.218	-31.961	-33.687	-32.997	-20.611	-32.518	-32.687	-32.715	-32.715	-32.741	-17.43	-30.886	-18.057	-30.937	-31.141
-13.114	-6.874	-51.256	-64.609	-57.338	-61.267	-73.175	-50.431	-79.681	-65.024	-80.192	-80.196	-72.328	-5.725	-71.962	-48.225	-54.622	-72.838
-14.475	-7.46	-37.475	-44.908	-48.658	-53.94	-56.78	-38.588	-52.927	-43.055	-52.93	-52.926	-58.336	-27.728	-54.782	-36.072	-55.361	-56.51
-18.523	-9.447	-23.29	-24.328	-32.338	-35.334	-38.504	-21.352	-47.721	-25.337	-42.291	-42.305	-33.197	-29.308	-39.277	-21.414	-36.979	-33.773
-15.779	-8.199	-27.266	-20.515	-27.016	-37.712	-47.025	-25.295	-59.303	-22.132	-52.714	-52.747	-35.497	-29.46	-45.007	-34.248	-41.693	-36.422
-14.725	-7.289	-30.698	-28.469	-33.918	-63.475	-64.275	-30.983	-52.662	-27.564	-54.933	-54.925	-19.837	-4.461	-62.282	-27.754	-64.552	-65.891
-14.324	-7.116	-35.007	-31.886	-36.19	-59.682	-55.756	-35.838	-50.285	-30.456	-51.324	-51.32	-22.953	-4.844	-53.759	-32.396	-55.692	-57.289
-15.191	-7.558	-29.379	-27.331	-33.067	-59.181	-66.955	-29.362	-54.542	-26.691	-58.288	-58.275	-58.198	-4.643	-64.952	-26.328	-67.198	-61.351
-16.869	-8.514	-25.649	-27.912	-35.811	-50.403	-55.441	-25.407	-50.89	-27.926	-54.617	-54.6	-18.605	-5.49	-53.437	-22.789	-55.909	-51.904
-12.781	-6.62	-37.281	-24.107	-24.567	-44.929	-51.95	-36.304	-41.277	-24.02	-53.29	-53.261	-42.698	-31.48	-49.975	-26.067	-56.633	-44.546
-17.007	-9.384	-24.233	-22.557	-25.238	-23.068	-28.817	-21.714	-32.725	-24.881	-25.458	-25.478	-22.305	-22.774	-26.815	-37.156	-24.544	-21.713
-16.422	-8.45	-26.614	-21.619	-28.308	-42.994	-53.457	-24.963	-51.942	-22.261	-66.06	-66.076	-40.851	-32.876	-57.247	-28.706	-48.839	-12.904
-15.813	-8.348	-30.066	-19.176	-24.873	-37.981	-54.923	-28.748	-44.035	-21.358	-60.254	-60.301	-35.764	-29.787	-52.907	-36.118	-44.523	-37.103
-12.884	-6.907	-37.607	-25.798	-25.458	-35.005	-47.529	-37.92	-38.73	-26.495	-52.655	-52.724	-22.396	-29.272	-45.562	-23.785	-41.62	-33.712
-13.343	-7.256	-31.975	-27.126	-27.312	-32.331	-44.662	-32.343	-37.439	-28.925	-44.361	-44.408	-22.278	-30.596	-42.688	-24.727	-38.944	-31.186
-15.087	-7.785	-30.584	-19.678	-25.03	-53.484	-53.132	-29.425	-42.433	-20.014	-48.244	-48.229	-14.174	-36.395	-51.147	-38.366	-58.818	-54.635
-14.481	-7.404	-31.082	-19.445	-24.668	-46.428	-60.708	-29.19	-53.975	-20.183	-77.809	-77.699	-14.862	-33.523	-58.679	-42.574	-51.805	-45.546
-12.764	-6.434	-35.941	-20.077	-23.3	-55.033	-63.594	-34.336	-49.565	-21.275	-55.37	-55.358	-19.128	-35.567	-61.62	-49.381	-67.84	-55.168
-12.059	-6.064	-39.2	-24.452	-24.223	-49.402	-65.716	-37.618	-49.518	-23.71	-58.77	-58.749	-21.993	-32.983	-63.757	-49.381	-58.752	-48.799
-13.279	-6.789	-35.325	-19.906	-23.486	-43.888	-65.224	-33.357	-51.983	-21.835	-87.034	-87.03	-18.99	-1.551	-63.17	-33.877	-49.276	-42.75
-16.978	-8.591	-26.547	-24.789	-31.292	-43.992	-48.504	-25.272	-77.779	-24.963	-57.905	-57.935	-16.599	-34.553	-49.992	-23.553	-46.673	-42.902
-16.437	-8.569	-29.733	-19.561	-25.304	-42.667	-58.245	-28.157	-47.935	-20.251	-67.886	-67.916	-40.482	-32.341	-56.219	-34.651	-49.034	-42.026
-12.117	-6.48	-37.994	-26.078	-25.01	-38.667	-39.055	-38.722	-35.322	-26.218	-67.855	-67.668	-22.91	-31.826	-37.071	-36.198	-49.231	-37.813
-14.72	-7.618	-34.324	-18.063	-22.924	-43.075	-59.324	-32.367	-54.067	-19.143	-69.005	-69.103	-14.051	-31.729	-57.284	-49.347	-47.5	-41.843
-23.625	-16.001	-12.675	-25.846	-20.329	-25.26	-26.528	-16.394	-22.229	-23.846	-23.846	-23.846	-26.348	-11.839	-24.652	-13.87	-22.011	-26.804
-14.427	-7.403	-33.979	-55.197	-63.661	-48.794	-61.998	-34.673	-63.314	-54.301	-61.639	-61.634	-60.409	-5.903	-60.334	-32.441	-47.344	-62.291
-22.564	-15.58	-12.011	-24.564	-19.341	-24.506	-26.051	-15.717	-20.913	-22.564	-22.564	-22.564	-25.931	-10.875	-24.102	-13.287	-21.086	-25.835
-14.561	-7.341	-34.464	-37.575	-42.528	-57.978	-59.389	-35.245	-53.093	-36.217	-53.747	-53.742	-62.32	-5.479	-57.392	4.118	-58.512	-60.197
-13.676	-6.776	-38.443	-36.337	-39.515	-59.621	-60.925	-37.918	-71.611	-35.623	-69.476	-69.485	-58.697	-4.84	-58.923	-34.975	-60.648	-59.179
-14.325	-7.339	-38.111	-43.432	-45.96	-54.717	-57.337	-37.546	-63.809	-43.484	-63.363	-63.37	-55.794	-11.438	-55.938	-35.013	-57.226	-56.091
-15.942	-8.031	-28.552	-31.799	-38.687	-52.811	-59.001	-28.639	-64.876	-31.607	-70.006	-69.976	-21.745	-5.749	-59.825	-25.328	-59.269	-54.531

## Sheet: RR
Data for PM
JAKY1	LOGL2	LOGI2	LOGN2	VANH2	VANZ2	FRED3	LOGI3	MLOG3	ONLG3	ORLG3	SHCA3	VANZ3	ANDE4	FRED4	GOMP4	LOGI4	VANG4
0.96984	0.92242	0.97434	0.99512	0.99873	0.99966	0.99914	0.97926	0.99857	0.99643	0.99843	0.99843	0.98683	0.96849	0.99914	0.9871	0.99926	0.99962
0.95491	0.90281	0.97951	0.99503	0.99901	0.99966	0.99928	0.98575	0.99874	0.99631	0.99866	0.99866	0.99963	0.99972	0.99928	0.98955	0.99942	0.99965
0.99277	0.96239	0.9498	0.99803	0.99364	0.99847	0.99875	0.95677	0.99726	0.99824	0.99832	0.99832	0.99864	0.98694	0.99875	0.96826	0.99881	0.99949
0.95831	0.90978	0.99042	0.98838	0.99586	0.99979	0.99906	0.99148	0.99781	0.99343	0.99838	0.99838	0.99048	0.99984	0.99906	0.99799	0.99954	0.99983
0.95915	0.91441	0.98513	0.98951	0.99656	0.99906	0.99807	0.98829	0.9967	0.99211	0.99695	0.99694	0.98607	0.99998	0.99807	0.99518	0.99879	0.99924
0.94867	0.90192	0.99309	0.99165	0.99459	0.99926	0.99827	0.99405	0.99686	0.99321	0.99749	0.99749	0.99924	0.99998	0.99827	0.99823	0.99914	0.99946
0.96837	0.9257	0.98357	0.99114	0.99607	0.99873	0.99729	0.98593	0.99572	0.99273	0.99575	0.99575	0.99233	0.9999	0.99729	0.99449	0.9981	0.99889
0.95905	0.89786	0.98555	0.99828	0.99839	0.99779	0.99911	0.98939	0.99865	0.99903	0.9994	0.9994	0.99769	0.99789	0.99911	0.99237	0.99932	0.99874
0.93929	0.85762	0.99399	0.9981	0.99918	0.99703	0.99978	0.99548	0.99975	0.99889	0.99913	0.99913	0.99535	0.99887	0.99978	0.99726	0.99922	0.99785
0.91968	0.83989	0.99797	0.99673	0.99879	0.99873	0.9997	0.998	0.99979	0.99835	0.99924	0.99925	0.99651	0.99891	0.9997	0.99873	0.99953	0.99918
0.98396	0.93271	0.96977	0.99573	0.99992	0.99833	0.99956	0.97101	0.99994	0.99779	0.99991	0.99991	0.99833	0.99777	0.99972	0.98399	0.9996	0.99881
0.98674	0.94888	0.95277	0.98249	0.99101	0.97903	0.99021	0.95623	0.99345	0.9914	0.98944	0.98945	0.97886	0.98825	0.99297	0.9678	0.99043	0.9857
0.98454	0.93711	0.97313	0.98168	0.99117	0.97695	0.99312	0.97211	0.99474	0.98966	0.9883	0.98832	0.97998	0.99034	0.99311	0.98696	0.98972	0.98538
0.98418	0.95215	0.94788	0.97747	0.98688	0.97006	0.98508	0.94716	0.98853	0.98621	0.98343	0.98345	0.97091	0.98426	0.9882	0.96401	0.98521	0.98017
0.9655	0.91368	0.93315	0.99831	0.99101	0.99662	0.99859	0.95704	0.99502	0.99831	0.99831	0.99831	0.99798	0.98055	0.99867	0.95378	0.99858	0.99932
0.97689	0.93873	0.91429	0.99644	0.98446	0.99423	0.9969	0.93522	0.9917	0.99644	0.99644	0.99644	0.9957	0.99064	0.9971	0.9337	0.99655	0.99896
0.95389	0.88469	0.95016	0.99874	0.99426	0.99697	0.99854	0.97083	0.99683	0.99874	0.99874	0.99874	0.9943	0.99586	0.99859	0.96924	0.99829	0.999
0.9932	0.95626	0.94396	0.99545	0.99421	0.99442	0.99247	0.9529	0.99382	0.99285	0.99316	0.99316	0.99326	0.98966	0.99347	0.94981	0.99183	0.98863
0.99077	0.95344	0.96109	0.98899	0.99786	0.98922	0.9969	0.96616	0.99809	0.99507	0.99601	0.99602	0.98944	0.99493	0.99826	0.97761	0.99549	0.9917
0.9741	0.924	0.98564	0.99072	0.99794	0.99987	0.99959	0.98646	0.99865	0.99542	0.99917	0.99917	0.99035	0.99944	0.9996	0.99512	0.9998	0.99997
0.95978	0.88935	0.99111	0.9921	0.99588	0.99151	0.99956	0.99198	0.99946	0.99454	0.99567	0.99569	0.98624	0.99773	0.99992	0.99938	0.99619	0.99297
0.93123	0.846	0.99744	0.99362	0.9968	0.99396	0.99991	0.99767	0.99999	0.99579	0.99676	0.99362	0.99007	0.99861	0.99991	0.99947	0.99744	0.99582
0.92176	0.83958	0.99719	0.99706	0.99896	0.99843	0.99976	0.99751	0.99973	0.99841	0.99915	0.99915	0.99622	0.99926	0.99976	0.99796	0.99949	0.99899
0.92321	0.84024	0.99759	0.99619	0.99855	0.9976	0.99985	0.99784	0.99988	0.99779	0.99866	0.99867	0.99508	0.99926	0.99985	0.99859	0.99912	0.99846
0.94402	0.89796	0.97824	0.99627	0.9974	0.99875	0.9982	0.98799	0.99722	0.99627	0.99702	0.99702	0.99339	0.99982	0.9982	0.99002	0.9986	0.99895
0.95744	0.90581	0.96617	0.99903	0.99861	0.99968	0.99978	0.97844	0.99903	0.99916	0.99944	0.99944	0.99232	0.98602	0.99978	0.9795	0.99978	0.99991
0.97379	0.91834	0.98612	0.99416	0.99899	0.99848	0.99978	0.98619	0.99983	0.99743	0.99997	0.99997	0.99846	0.99773	0.99988	0.99534	0.99977	0.99895
0.97664	0.92808	0.97251	0.99566	0.99852	0.9993	0.99961	0.98415	0.99867	0.99743	0.99922	0.99922	0.99707	0.99975	0.99962	0.98871	0.99976	0.99948
0.97787	0.92633	0.98435	0.99292	0.99904	0.99891	0.99994	0.98482	0.9996	0.9965	0.99981	0.99981	0.9989	0.99843	0.99994	0.99396	0.99986	0.95111
0.9785	0.9317	0.98371	0.99228	0.99781	0.9999	0.9991	0.98503	0.99785	0.99529	0.99832	0.99832	0.99276	0.99991	0.9991	0.99344	0.99943	0.99993
0.99111	0.97691	0.93158	0.98273	0.99243	0.9725	0.98799	0.93154	0.99119	0.99087	0.98798	0.988	0.97355	0.99128	0.99172	0.94485	0.99104	0.98773
0.94411	0.88831	0.99846	0.98594	0.98918	0.98496	0.99946	0.99851	0.99854	0.99064	0.99062	0.99066	0.98194	0.99484	0.99946	0.99962	0.99169	0.98931
0.95825	0.91418	0.99731	0.98583	0.99094	0.98765	0.99919	0.99729	0.99743	0.98783	0.99056	0.99061	0.98399	0.99646	0.99919	0.99883	0.99113	0.98962
0.95989	0.91243	0.99701	0.97623	0.9865	0.98392	0.99927	0.99682	0.99828	0.98843	0.98965	0.9897	0.97735	0.99558	0.99927	0.99929	0.99098	0.98806
0.9485	0.90351	0.99927	0.99061	0.99443	0.99251	0.9999	0.99925	0.99956	0.99378	0.99531	0.99533	0.98988	0.9992	0.9999	0.99953	0.99599	0.9952
0.95621	0.90889	0.9981	0.98993	0.99292	0.98962	0.99966	0.99815	0.99928	0.99355	0.99384	0.99386	0.98768	0.99764	0.99989	0.99876	0.99467	0.99266
0.9668	0.91312	0.99365	0.97902	0.98807	0.97993	0.99791	0.99338	0.99769	0.98753	0.98908	0.98912	0.98514	0.99291	0.99791	0.99904	0.99051	0.98689
0.99737	0.96555	0.9337	0.99526	0.99851	0.99595	0.99722	0.95548	0.99862	0.99823	0.99825	0.99826	0.99558	0.99709	0.99802	0.96364	0.99834	0.99669
0.99082	0.94647	0.96533	0.9899	0.999	0.99359	0.99924	0.96879	0.99992	0.99733	0.99889	0.99889	0.99387	0.99851	0.99924	0.98275	0.9989	0.99652
0.98658	0.93897	0.96339	0.99362	0.99878	0.99723	0.99949	0.97123	0.99926	0.99774	0.99982	0.99982	0.99732	0.99908	0.99949	0.982	0.99968	0.99894
0.9907	0.98888	0.89803	0.99473	0.98992	0.99365	0.99534	0.93161	0.99325	0.99549	0.9956	0.9956	0.99332	0.99449	0.99534	0.94139	0.9953	0.99755
0.95147	0.88033	0.9946	0.99354	0.99615	0.99244	0.99816	0.99436	0.99927	0.99651	0.99642	0.99644	0.98939	0.99502	0.99816	0.99979	0.99707	0.99541
0.9324	0.85312	0.99718	0.9951	0.99805	0.9965	0.9997	0.99717	0.99995	0.99701	0.9951	0.99807	0.99368	0.99844	0.9997	0.9995	0.99857	0.99768
0.93882	0.86425	0.99663	0.99709	0.99719	0.99596	0.99993	0.99747	0.99984	0.9985	0.99884	0.99885	0.99328	0.99809	0.99993	0.99744	0.99874	0.99688
0.9889	0.94342	0.96467	0.99283	0.99956	0.99651	0.99978	0.97089	0.99993	0.99785	0.9998	0.9998	0.99663	0.99936	0.99978	0.98343	0.99973	0.99819
0.98756	0.95315	0.92839	0.99934	0.99094	0.99654	0.99836	0.93945	0.99632	0.99936	0.99934	0.99934	0.99708	0.99418	0.99858	0.94545	0.99929	0.99969
0.98086	0.94218	0.98628	0.98227	0.99118	0.98014	0.99576	0.98498	0.99591	0.98227	0.98656	0.98659	0.98147	0.99242	0.99575	0.99729	0.98861	0.98416
0.96755	0.92918	0.99577	0.98116	0.98875	0.98162	0.99879	0.99523	0.99751	0.98626	0.98743	0.98748	0.97758	0.99626	0.99952	0.99918	0.98942	0.9864
0.97208	0.90805	0.98483	0.99147	0.99568	0.98875	0.99698	0.98518	0.9979	0.99229	0.99424	0.99425	0.99017	0.99306	0.99698	0.9983	0.99421	0.99049
0.95556	0.87859	0.99151	0.99465	0.9973	0.99356	0.99957	0.992	0.99995	0.9965	0.99744	0.99745	0.98953	0.99779	0.99957	0.99969	0.99767	0.99511
0.99813	0.97654	0.91804	0.99775	0.99616	0.99648	0.99832	0.94719	0.99864	0.99925	0.99884	0.99884	0.99646	0.98769	0.99852	0.95763	0.99924	0.99957
0.99092	0.95506	0.962	0.99366	0.99501	0.99886	0.99727	0.97252	0.9958	0.99517	0.99622	0.99622	0.9988	0.99917	0.99728	0.98041	0.99733	0.99888
0.97836	0.93875	0.97743	0.99305	0.99535	0.99859	0.99701	0.98031	0.99514	0.99347	0.99511	0.99511	0.99416	0.9997	0.99702	0.99097	0.99756	0.99866
0.95068	0.89026	0.99542	0.99818	0.99798	0.99975	0.99978	0.99542	0.99902	0.99845	0.99958	0.99958	0.99786	0.99863	0.99979	0.9966	0.9999	0.99986
0.94378	0.87838	0.99754	0.99842	0.99774	0.99972	0.99971	0.99755	0.99881	0.99859	0.99967	0.99967	0.99781	0.99862	0.99971	0.99359	0.99993	0.99984
0.9621	0.90431	0.9926	0.99757	0.99856	0.99972	0.99988	0.99277	0.99914	0.99825	0.99963	0.99963	0.99741	0.99886	0.99988	0.99727	0.99998	0.99979
0.94703	0.90274	0.98247	0.99389	0.99708	0.99826	0.99752	0.9892	0.9965	0.99425	0.99617	0.99617	0.99422	0.91192	0.99752	0.99399	0.99831	0.99867
0.97307	0.92466	0.98601	0.99506	0.99786	0.99981	0.99895	0.98703	0.99769	0.99596	0.99793	0.99793	0.99642	0.99987	0.99895	0.99539	0.99932	0.99981
0.95498	0.8956	0.99526	0.99706	0.99715	0.99989	0.99969	0.99537	0.99863	0.9978	0.99949	0.99949	0.99691	0.99896	0.99969	0.99664	0.99995	0.99994
0.92157	0.83775	0.99784	0.99882	0.99938	0.99852	0.9998	0.99859	0.99947	0.99942	0.99964	0.99964	0.9971	0.99955	0.9998	0.99835	0.99969	0.99899
0.98879	0.95386	0.95221	0.99866	0.995	0.99891	0.99933	0.95907	0.998	0.99885	0.99896	0.99896	0.9991	0.987	0.99924	0.96939	0.99939	0.99982
0.98454	0.94049	0.97316	0.99512	0.99911	0.99979	0.99968	0.97553	0.99912	0.99674	0.99912	0.99912	0.99981	0.99983	0.99968	0.98684	0.99975	1
0.98386	0.9478	0.95598	0.99793	0.99475	0.99897	0.99893	0.9637	0.99752	0.99798	0.99821	0.99821	0.99923	0.98447	0.99893	0.97297	0.99889	0.99951
0.96102	0.91502	0.93449	0.9958	0.98748	0.99549	0.99714	0.95859	0.99155	0.9958	0.9958	0.9958	0.99664	0.97952	0.99719	0.95637	0.99671	0.99767
0.99624	0.96617	0.93708	0.99665	0.99896	0.99726	0.99925	0.95853	0.99971	0.9992	0.99981	0.99981	0.99701	0.99962	0.99939	0.96255	0.9999	0.99942
0.97276	0.92622	0.92838	0.99849	0.99039	0.99645	0.9985	0.94882	0.99508	0.99849	0.99849	0.99849	0.99772	0.98597	0.99862	0.94623	0.9986	0.99937
0.9856	0.94941	0.95617	0.99789	0.99543	0.99893	0.99901	0.96379	0.99824	0.99812	0.99842	0.99842	0.99919	0.98534	0.99901	0.97149	0.99902	0.9996
0.97531	0.93766	0.96978	0.99401	0.9954	0.99831	0.99703	0.97588	0.9957	0.9944	0.99549	0.99548	0.98884	0.97274	0.99703	0.98511	0.99728	0.99828
0.96	0.91939	0.97682	0.99307	0.99563	0.99773	0.99658	0.98357	0.99515	0.99331	0.9948	0.9948	0.99769	0.96325	0.99658	0.99089	0.99732	0.99802
0.95448	0.91086	0.97333	0.99569	0.9967	0.99861	0.99786	0.98364	0.99681	0.9957	0.99654	0.99654	0.99075	0.99974	0.99786	0.98686	0.99826	0.99876
0.97505	0.92043	0.9753	0.98693	0.99169	0.98091	0.99407	0.97593	0.99619	0.99178	0.99058	0.99059	0.98155	0.99038	0.99595	0.99037	0.99148	0.98613
0.9753	0.91712	0.9888	0.98729	0.99352	0.98483	0.99798	0.98845	0.99886	0.99258	0.9928	0.99283	0.9886	0.99473	0.99798	0.9986	0.99423	0.99064
0.94713	0.86711	0.99452	0.99284	0.99652	0.99248	0.99924	0.99438	0.99973	0.99497	0.99624	0.99626	0.9884	0.99718	0.99923	0.9992	0.99682	0.99472
0.96547	0.90586	0.98982	0.99567	0.99842	0.99765	0.99947	0.98972	0.99968	0.9982	0.99972	0.99972	0.9976	0.99713	0.99963	0.99596	0.99948	0.99836
0.98885	0.95571	0.96455	0.99415	0.9933	0.99806	0.9965	0.9697	0.99439	0.99431	0.99481	0.99481	0.99794	0.99879	0.9965	0.98167	0.99633	0.99795
0.98176	0.94062	0.9724	0.99477	0.99735	0.99942	0.99847	0.97573	0.99749	0.99597	0.99742	0.99742	0.99936	0.96894	0.99847	0.98693	0.99859	0.99936
0.99106	0.94804	0.97033	0.99258	0.99749	0.9878	0.99664	0.96979	0.99816	0.99258	0.99552	0.99553	0.98929	0.99572	0.99664	0.98666	0.99598	0.99331
0.97893	0.95523	0.99721	0.99697	0.99876	0.99806	0.99984	0.99721	0.99976	0.99822	0.99865	0.99865	0.99725	0.99931	0.99984	0.99874	0.99925	0.9989
0.99044	0.97752	0.99858	0.99714	0.99899	0.99759	0.99992	0.99856	0.99999	0.99857	0.99887	0.99888	0.99657	0.9995	0.93863	0.99989	0.99941	0.99922
0.97145	0.96632	0.99934	0.99651	0.99846	0.99814	0.99999	0.99932	0.99997	0.9981	0.99869	0.9987	0.99727	0.9997	0.99999	0.99989	0.99913	0.99896
0.96146	0.90346	0.98862	0.99701	0.9975	0.99993	0.99859	0.99091	0.99788	0.99812	0.99876	0.99876	0.9978	0.99992	0.99859	0.99122	0.99913	0.99993
0.92162	0.84661	0.99807	0.99943	0.99918	0.9997	0.99959	0.99838	0.99893	0.99964	0.99983	0.99983	0.99913	0.99942	0.99959	0.99828	0.99993	0.99981
0.94237	0.87414	0.99673	0.99841	0.9977	0.99945	0.99962	0.99746	0.99862	0.99891	0.99979	0.99979	0.99815	0.99864	0.99962	0.99297	0.99992	0.99965
0.94124	0.87266	0.99685	0.9987	0.99845	0.99973	0.99947	0.99744	0.99842	0.99869	0.9994	0.9994	0.99897	0.99898	0.99947	0.99104	0.99982	0.99985
0.97076	0.93087	0.96354	0.99682	0.99531	0.99902	0.99832	0.97326	0.99692	0.99682	0.99717	0.99717	0.99903	0.97717	0.99832	0.97982	0.99837	0.99903
0.99193	0.95248	0.96637	0.9963	0.99887	0.99931	0.99969	0.96932	0.99933	0.99785	0.99939	0.99939	0.99932	0.99982	0.99969	0.98063	0.99976	0.99996
0.99075	0.9516	0.96631	0.98479	0.9975	0.9904	0.99807	0.96937	0.99839	0.99495	0.99645	0.99646	0.99097	0.99693	0.99899	0.98091	0.99637	0.99296
0.9968	0.97495	0.91834	0.99735	0.99545	0.99611	0.99826	0.9504	0.99859	0.99882	0.99896	0.99896	0.99609	0.98755	0.99848	0.95983	0.99928	0.99977
0.97108	0.92752	0.9656	0.99745	0.99734	0.9995	0.99917	0.97404	0.99832	0.99766	0.99831	0.99831	0.99062	0.97581	0.99917	0.98098	0.9992	0.99964
0.97227	0.93742	0.9533	0.99683	0.9907	0.99815	0.99777	0.96658	0.99396	0.99683	0.99683	0.99683	0.99335	0.98253	0.99777	0.97247	0.99762	0.99842
0.98598	0.94414	0.96142	0.99851	0.99794	0.9995	0.99982	0.96526	0.99902	0.99901	0.9995	0.9995	0.99954	0.97928	0.99977	0.9787	0.99983	0.99996
0.97755	0.92697	0.9814	0.99394	0.99933	0.99971	0.99993	0.98221	0.99949	0.99692	0.99968	0.99968	0.99256	0.99909	0.99993	0.99346	0.99997	0.99987
0.97327	0.9196	0.98436	0.99438	0.99919	0.99943	0.99992	0.9847	0.99963	0.99767	0.99983	0.99983	0.99442	0.99852	0.99992	0.99562	0.99994	0.99967
0.92317	0.8484	0.99937	0.99402	0.9971	0.99715	0.99979	0.99933	0.99997	0.99698	0.99843	0.99402	0.99428	0.99812	0.99979	0.99996	0.9987	0.99832
0.9558	0.88721	0.99042	0.99436	0.99689	0.99145	0.99907	0.99195	0.99972	0.99616	0.99659	0.99436	0.98827	0.99613	0.99907	0.99928	0.99648	0.99302
0.96338	0.90504	0.9918	0.99594	0.9983	0.99915	0.99999	0.99183	0.99968	0.99809	0.99998	0.99998	0.99913	0.99794	1	0.99821	0.99991	0.93498
0.91918	0.83216	0.99854	0.99671	0.99856	0.99708	0.99994	0.99897	0.99987	0.99799	0.99671	0.99856	0.99482	0.99944	0.99994	0.99746	0.99893	0.99808
0.91623	0.82806	0.99899	0.99524	0.99779	0.99634	0.99998	0.99921	0.99998	0.99701	0.99794	0.99795	0.9936	0.99936	0.99998	0.99852	0.99845	0.99767
0.90269	0.81671	0.99956	0.99542	0.99778	0.99835	0.99989	0.9996	0.99995	0.99755	0.99896	0.99542	0.99574	0.99969	0.99989	0.99913	0.99924	0.99902
0.90742	0.82199	0.99952	0.9944	0.99731	0.99755	0.99995	0.99955	0.99999	0.99688	0.99848	0.9985	0.99457	0.99955	0.99995	0.99946	0.99886	0.99855
0.98369	0.93448	0.97876	0.99311	0.99966	0.99858	0.99991	0.97941	0.9999	0.9967	0.99996	0.99996	0.99857	0.99836	0.99998	0.9898	0.99983	0.99901
0.96577	0.90587	0.99073	0.99138	0.99707	0.9974	0.99964	0.99066	0.99993	0.99661	0.99975	0.99975	0.99735	0.99632	0.99963	0.99761	0.99929	0.93504
0.97171	0.91676	0.98826	0.99398	0.99847	0.99906	0.99998	0.98858	0.99952	0.99729	0.99995	0.99995	0.99905	0.99854	0.99998	0.99511	0.99996	0.99935
0.95644	0.89375	0.99442	0.99648	0.99758	0.99847	0.99985	0.99436	0.9996	0.99854	0.99994	0.99994	0.99844	0.9974	0.99985	0.99753	0.99973	0.99889
0.98264	0.93728	0.96593	0.99727	0.99917	0.99967	0.99988	0.97008	0.9996	0.99797	0.99948	0.99948	0.99973	0.97769	0.99988	0.98021	0.99988	0.99992
0.96153	0.89871	0.95246	0.99954	0.99653	0.99801	0.99894	0.9694	0.99844	0.99963	0.99951	0.99951	0.99846	0.97275	0.99902	0.96675	0.99944	0.99919
0.96134	0.91478	0.946	0.99815	0.99232	0.9978	0.99938	0.96806	0.99527	0.99815	0.99815	0.99815	0.99927	0.9786	0.99939	0.96571	0.99922	0.99975
0.99011	0.95478	0.95006	0.99922	0.99548	0.99875	0.99946	0.95645	0.99836	0.99941	0.99947	0.99947	0.99891	0.9881	0.99948	0.96724	0.99977	0.99999
0.97039	0.91887	0.98929	0.99353	0.99716	0.99996	0.99904	0.99006	0.99757	0.99591	0.9984	0.9984	0.99507	0.99979	0.99904	0.99545	0.9995	0.99996
0.95657	0.89523	0.99069	0.99644	0.99762	0.99944	0.99996	0.99404	0.99935	0.99804	0.99994	0.99994	0.99816	0.99869	0.99996	0.99597	0.99986	0.999
0.99185	0.95012	0.96102	0.99768	0.99908	0.99872	0.99971	0.96375	0.9999	0.99876	0.99994	0.99994	0.99873	0.97931	0.99981	0.97572	0.99994	0.99961
0.97297	0.92323	0.96527	0.99807	0.99909	0.99953	0.99981	0.97241	0.99966	0.99864	0.99958	0.99958	0.99961	0.97578	0.99981	0.97814	0.99982	0.99987
0.96822	0.92529	0.96832	0.99651	0.99712	0.9993	0.99864	0.97684	0.99775	0.99675	0.99757	0.99757	0.98984	0.97362	0.99864	0.98309	0.99875	0.9993
0.9537	0.9131	0.93719	0.99396	0.98469	0.9954	0.99842	0.96602	0.98907	0.99396	0.99396	0.99396	0.99726	0.9774	0.99845	0.96402	0.9968	0.99899
0.99093	0.95577	0.95049	0.99887	0.99581	0.99861	0.99934	0.95769	0.99896	0.99924	0.99935	0.99935	0.99881	0.98892	0.99938	0.9654	0.99966	0.99994
0.98588	0.94538	0.9742	0.99281	0.99803	0.99965	0.99893	0.97723	0.99794	0.99488	0.99812	0.99812	0.99969	1	0.99893	0.98628	0.99916	0.99979
0.97565	0.93261	0.97449	0.99384	0.99805	0.99958	0.99876	0.97882	0.99786	0.99511	0.99776	0.99776	0.9842	0.97052	0.99876	0.98716	0.99901	0.99957
0.97349	0.93106	0.97925	0.99132	0.99719	0.99929	0.99812	0.98253	0.99682	0.99331	0.99693	0.99693	0.99927	0.99997	0.99812	0.99101	0.99862	0.99931
0.98206	0.94884	0.96501	0.99356	0.99374	0.99774	0.99621	0.97156	0.99487	0.99396	0.99475	0.99474	0.98708	0.97642	0.99622	0.98078	0.9963	0.99761
0.97712	0.93199	0.97413	0.99493	0.99867	0.99981	0.99926	0.9775	0.99859	0.99643	0.9985	0.9985	0.99979	0.96893	0.99926	0.98793	0.99937	0.99979
0.99174	0.95479	0.95422	0.99456	0.99957	0.99915	0.99939	0.97136	0.99953	0.99783	0.99945	0.99945	0.99892	0.99883	0.99959	0.97887	0.99943	0.9984
0.9339	0.84859	0.99735	0.98641	0.99213	0.98848	0.99949	0.99736	0.9991	0.99038	0.99296	0.993	0.98148	0.99706	0.99984	0.99978	0.99411	0.99207
0.92011	0.84272	0.99935	0.99246	0.99618	0.99632	0.99988	0.9993	0.99989	0.99597	0.99778	0.9978	0.99279	0.9985	0.99988	1	0.99817	0.99773
0.9115	0.83457	0.99978	0.99484	0.99728	0.9982	0.9999	0.99977	1	0.99484	0.9989	0.99891	0.99541	0.99881	0.9999	0.99992	0.99911	0.99889
0.91018	0.83376	0.99954	0.99619	0.99813	0.99827	0.99992	0.99951	0.99999	0.99798	0.99619	0.99894	0.99667	0.99898	0.99992	0.99987	0.99916	0.99895
0.98447	0.93389	0.97708	0.99026	0.99908	0.99709	0.99929	0.9776	0.99976	0.99557	0.99941	0.99941	0.97893	0.99691	0.99929	0.98783	0.99899	0.99761
0.97678	0.92515	0.98224	0.98793	0.99772	0.99863	0.99981	0.98693	0.99978	0.99491	0.99965	0.99965	0.99846	0.99805	0.99996	0.99257	0.99941	0.99837
0.94105	0.87319	0.99667	0.99801	0.99783	0.9983	0.99992	0.99712	0.99954	0.99908	0.99994	0.99994	0.99679	0.9979	0.99992	0.99808	0.99971	0.99873
0.90919	0.82502	0.99947	0.99437	0.99732	0.99757	0.99994	0.99948	1	0.9969	0.99849	0.9985	0.99458	0.99946	0.99994	0.99956	0.99887	0.99856
0.91099	0.83132	0.99954	0.99524	0.99772	0.99834	0.99987	0.99953	0.99999	0.99762	0.99896	0.99524	0.99567	0.99908	0.99987	0.99969	0.99923	0.99899
0.98896	0.95751	0.95643	0.99647	0.9937	0.99856	0.99788	0.96331	0.99658	0.99664	0.99695	0.99695	0.9987	0.98326	0.99788	0.97405	0.99781	0.99885
0.9788	0.93582	0.97837	0.99289	0.99757	0.99958	0.99854	0.98079	0.99741	0.9949	0.99744	0.99744	0.99002	0.99997	0.99855	0.99094	0.99884	0.99957
0.97197	0.93258	0.96841	0.99522	0.99609	0.99874	0.99775	0.97592	0.99661	0.99544	0.99638	0.99638	0.9887	0.97416	0.99775	0.98354	0.99796	0.99874
0.98613	0.94774	0.95166	0.999	0.99579	0.99888	0.9995	0.95988	0.99876	0.99925	0.99932	0.99932	0.99914	0.98723	0.99946	0.96632	0.99961	0.99986
0.96462	0.91415	0.9566	0.99974	0.99762	0.99929	0.9999	0.97116	0.99887	0.99975	0.99979	0.99979	0.99975	0.99982	0.9999	0.97126	0.99995	0.99999
0.96708	0.92093	0.98095	0.99242	0.99768	0.99933	0.99845	0.98388	0.99741	0.99463	0.99742	0.99742	0.98956	0.99976	0.99845	0.99295	0.99881	0.99932
0.93962	0.88015	0.9732	0.99948	0.99839	0.9995	0.9998	0.98566	0.99857	0.99948	0.99948	0.99948	0.99989	0.96218	0.9998	0.98489	0.99979	0.9999
0.9753	0.93323	0.95199	0.99932	0.99578	0.99906	0.99967	0.96367	0.99778	0.99932	0.99932	0.99932	0.99947	0.99047	0.99964	0.96849	0.99963	0.9999
0.97573	0.92724	0.97385	0.99591	0.99941	0.99978	0.99974	0.97668	0.99935	0.99747	0.99929	0.99929	0.9998	0.96773	0.99974	0.98834	0.99977	0.99992
0.96479	0.91821	0.98065	0.99378	0.99842	0.99964	0.999	0.98395	0.99813	0.99529	0.99802	0.99802	0.99226	0.99997	0.999	0.9938	0.99932	0.99969
0.98735	0.94736	0.96611	0.99441	0.99871	0.99937	0.99919	0.97655	0.9986	0.99712	0.9985	0.9985	0.99937	0.99991	0.99919	0.98382	0.99933	0.99982
0.95437	0.89084	0.99497	0.99656	0.99744	0.9983	0.99986	0.99491	0.99961	0.99848	0.99994	0.99994	0.99827	0.99734	0.99986	0.9974	0.99969	0.99875
0.97145	0.92488	0.98224	0.99304	0.99818	0.9998	0.99906	0.98408	0.99801	0.9953	0.99811	0.99811	0.99242	0.99993	0.99906	0.99436	0.99935	0.9998
0.9628	0.91876	0.98122	0.99272	0.99716	0.99889	0.99788	0.985	0.99673	0.99397	0.99651	0.99651	0.99886	0.9999	0.99788	0.99376	0.99846	0.99902
0.96582	0.91306	0.98962	0.99577	0.99823	0.99999	0.99962	0.99005	0.99864	0.99718	0.99906	0.99906	0.99665	0.99945	0.99962	0.9975	0.99982	1
0.93709	0.86697	0.99774	0.99931	0.99844	0.99858	0.99993	0.99773	0.9999	0.99933	0.99943	0.99943	0.99837	0.9972	0.99997	0.99654	0.99909	0.99762
0.97827	0.9329	0.9774	0.99551	0.99866	0.99989	0.99938	0.9793	0.99849	0.99663	0.99845	0.99845	0.99475	0.99987	0.99938	0.99187	0.99951	0.99988
0.97136	0.92224	0.98728	0.99148	0.99753	0.99995	0.99925	0.9882	0.99801	0.99505	0.99855	0.99855	0.99287	0.99975	0.99925	0.99615	0.99961	0.99995
0.957	0.89569	0.99443	0.99654	0.99741	0.99926	0.99983	0.99442	0.99913	0.99853	0.99982	0.99982	0.99924	0.99813	0.99983	0.9971	0.99988	0.99953
0.95073	0.8943	0.99426	0.9972	0.99745	0.99971	0.99901	0.99438	0.99782	0.99703	0.99841	0.99841	0.998	0.99923	0.99901	0.99793	0.99939	0.99966
0.9904	0.95484	0.95805	0.99784	0.99634	0.99917	0.99927	0.96325	0.99849	0.9983	0.99873	0.99873	0.99927	0.98289	0.99927	0.97467	0.99928	0.99982
0.98061	0.94142	0.95936	0.99799	0.99595	0.99931	0.99917	0.96671	0.9979	0.99813	0.99843	0.99843	0.99953	0.98153	0.99917	0.97629	0.99914	0.99966
0.98065	0.94171	0.96591	0.99628	0.99663	0.99934	0.99855	0.97147	0.99751	0.99667	0.99746	0.99746	0.99033	0.97685	0.99855	0.98216	0.99858	0.99933
0.9818	0.98606	0.85362	0.98699	0.96981	0.98465	0.98743	0.90678	0.97914	0.98699	0.98699	0.98699	0.98549	0.99545	0.98782	0.91897	0.98587	0.99506
0.98948	0.95946	0.95066	0.9976	0.99231	0.99832	0.9984	0.95816	0.99622	0.9976	0.99764	0.99763	0.99856	0.98713	0.9984	0.96955	0.99834	0.99918
0.9817	0.9361	0.96975	0.99559	0.99864	0.99922	0.99911	0.97305	0.99873	0.99709	0.99867	0.99867	0.99924	0.97269	0.99912	0.98339	0.99917	0.99943
0.9555	0.88986	0.99135	0.99688	0.99643	0.99575	0.99963	0.99362	0.99983	0.99863	0.99918	0.99919	0.9959	0.99711	0.99963	0.99662	0.99881	0.99668
0.94555	0.87448	0.99425	0.99836	0.99822	0.99664	0.99982	0.99573	0.99981	0.99922	0.99939	0.99939	0.99577	0.99797	0.99982	0.99699	0.99914	0.9974
0.95733	0.89556	0.99218	0.9978	0.99827	0.99936	0.99981	0.99382	0.99899	0.99889	0.99982	0.99982	0.99797	0.99872	0.99981	0.9955	0.99995	0.99959
0.96542	0.90906	0.98979	0.99593	0.99817	0.99929	0.99983	0.99146	0.99908	0.99755	0.99958	0.99958	0.9956	0.99892	0.99983	0.99592	0.99992	0.99943
0.99373	0.95143	0.96684	0.99149	0.99768	0.98616	0.99732	0.96669	0.99868	0.99617	0.99149	0.99546	0.98783	0.99712	0.99732	0.98286	0.99653	0.99308
0.98758	0.93377	0.9732	0.99416	0.99864	0.99101	0.99875	0.97428	0.99959	0.99679	0.99732	0.99416	0.99181	0.99784	0.99875	0.98962	0.99749	0.99417
0.97078	0.92977	0.96564	0.99674	0.99594	0.9991	0.99837	0.97405	0.99699	0.99681	0.99723	0.99723	0.99264	0.97979	0.99837	0.98266	0.9984	0.99905
0.96908	0.92936	0.98044	0.99169	0.99476	0.99774	0.99609	0.98365	0.99419	0.99209	0.99402	0.99402	0.99413	0.95532	0.99609	0.99307	0.99704	0.99804
0.97825	0.93561	0.98115	0.99316	0.99476	0.99864	0.99677	0.98373	0.99445	0.99339	0.9948	0.9948	0.99598	0.99971	0.99678	0.99104	0.99734	0.99869
0.90955	0.82864	0.99949	0.99531	0.99779	0.99837	0.99988	0.99949	0.99998	0.99761	0.99897	0.99898	0.99572	0.99923	0.99988	0.99959	0.99926	0.99901
0.92255	0.85742	0.99979	0.99695	0.99794	0.99808	0.99979	0.99978	0.99997	0.99852	0.99909	0.9991	0.99618	0.99756	0.99979	1	0.99908	0.9986
0.92296	0.85154	0.99916	0.99638	0.99838	0.99775	0.99972	0.99912	0.99997	0.99638	0.99638	0.99895	0.99647	0.99796	0.99972	0.99988	0.99912	0.99873
0.94294	0.88418	0.99862	0.99234	0.99383	0.98885	0.99866	0.99866	0.99886	0.99437	0.99334	0.99336	0.98799	0.99374	0.99865	0.99994	0.99382	0.99135
0.93083	0.87677	0.99731	0.99323	0.99434	0.99254	0.99981	0.99767	0.99869	0.99343	0.99596	0.99323	0.99325	0.99763	0.99981	0.99983	0.99547	0.99554
0.98157	0.94104	0.97357	0.99757	0.99869	0.99805	0.9996	0.98565	0.99874	0.99791	0.99852	0.99853	0.99856	0.99994	0.9996	0.99316	0.99937	0.99841
0.95038	0.87672	0.9922	0.9945	0.99723	0.99182	0.99929	0.99322	0.99979	0.99607	0.99644	0.99644	0.98902	0.99692	0.99929	0.99983	0.9966	0.9935
0.9212	0.84757	0.99889	0.99663	0.99864	0.99813	0.99975	0.99884	0.99997	0.99826	0.99901	0.99901	0.99684	0.99832	0.99975	0.99973	0.99924	0.99891
0.92691	0.86198	0.99962	0.99692	0.99785	0.99773	0.99964	0.99961	0.99995	0.99845	0.99692	0.99896	0.99594	0.99713	0.99964	0.99997	0.99893	0.99833
0.93363	0.87726	0.99982	0.99542	0.99638	0.99403	0.99989	0.99986	0.99982	0.99719	0.99673	0.99674	0.99281	0.99755	0.99989	0.99999	0.99711	0.99598
0.93537	0.87902	0.99968	0.99523	0.99624	0.99323	0.9995	0.99971	0.99969	0.99685	0.99618	0.99619	0.99219	0.99676	0.9995	0.99994	0.99659	0.99516
0.98164	0.93171	0.97145	0.99716	0.99948	0.99864	0.99943	0.97261	0.99959	0.99853	0.99963	0.99963	0.99862	0.99839	0.9995	0.98721	0.99962	0.99931
0.98209	0.9334	0.97361	0.99629	0.99968	0.99937	0.99986	0.97499	0.9997	0.99801	0.99972	0.99972	0.99937	0.99904	0.99986	0.98827	0.9999	0.99974
0.9736	0.91765	0.98582	0.99389	0.99835	0.99789	0.99925	0.98587	0.99917	0.99754	0.99956	0.99956	0.99321	0.99754	0.99925	0.99381	0.99942	0.99875
0.95578	0.89382	0.99412	0.99781	0.99839	0.99891	0.99989	0.99406	0.99972	0.9991	0.99997	0.99997	0.99776	0.99749	0.99993	0.99815	0.99983	0.99922
0.97139	0.91872	0.98584	0.99369	0.99757	0.99981	0.99945	0.98915	0.9985	0.99718	0.99916	0.99916	0.99981	0.9997	0.99945	0.99343	0.99982	0.9999
0.94009	0.86772	0.99595	0.99859	0.99821	0.99721	0.99991	0.99699	0.9997	0.99938	0.99956	0.99957	0.99722	0.99821	0.99991	0.99621	0.99934	0.99787
0.95016	0.88495	0.99551	0.99842	0.99707	0.99811	0.99979	0.99579	0.99995	0.99873	0.99944	0.99944	0.99691	0.99676	0.99991	0.99773	0.99886	0.99757
0.97967	0.93762	0.97152	0.99142	0.99216	0.99762	0.9951	0.98285	0.99201	0.99155	0.99275	0.99275	0.99755	0.99898	0.9951	0.98748	0.99568	0.99767
0.97026	0.93063	0.9645	0.99654	0.99525	0.99893	0.99815	0.97385	0.99662	0.99654	0.99689	0.99689	0.99176	0.97607	0.99815	0.98133	0.99753	0.99892
0.99118	0.9571	0.95078	0.99893	0.99537	0.99856	0.99939	0.95676	0.99826	0.99908	0.99923	0.99923	0.99871	0.98779	0.99943	0.9679	0.99959	0.99987
0.97501	0.92571	0.98324	0.99185	0.99845	0.99987	0.99959	0.98433	0.99876	0.99572	0.99911	0.99911	0.9902	0.9995	0.9996	0.99339	0.99976	0.99996
0.97876	0.92848	0.96543	0.99759	0.99965	0.99935	0.99983	0.97017	0.99991	0.99837	0.9999	0.9999	0.99939	0.97638	0.99989	0.97831	0.99994	0.99975
0.99719	0.96693	0.92657	0.99817	0.99625	0.99644	0.99859	0.94754	0.99873	0.99958	0.99942	0.99942	0.99645	0.98791	0.99885	0.95926	0.99948	0.99914
0.99647	0.96406	0.94913	0.99177	0.99969	0.99359	0.99875	0.95635	0.99972	0.99824	0.9991	0.9991	0.99371	0.9987	0.99937	0.96863	0.99923	0.99744
0.98423	0.95141	0.95041	0.97315	0.98628	0.96263	0.98449	0.94825	0.98696	0.98278	0.9803	0.98033	0.9659	0.98464	0.9895	0.96386	0.98345	0.97908
0.98699	0.94228	0.96573	0.99773	0.99939	0.9993	0.99989	0.96794	0.99977	0.99863	0.99982	0.99982	0.99931	0.99917	0.99992	0.98172	0.99994	0.99964
0.97218	0.92197	0.97009	0.99744	0.99969	0.99983	0.99997	0.9745	0.99978	0.99831	0.99972	0.99972	0.99153	0.97049	0.99997	0.9855	0.99998	0.99996
0.95712	0.8984	0.99451	0.99679	0.99739	0.99984	0.99979	0.99461	0.99885	0.99792	0.9996	0.99959	0.99984	0.99884	0.99979	0.99821	0.99997	0.9999
0.94231	0.88655	0.99676	0.99628	0.9959	0.99956	0.9984	0.997	0.99693	0.99569	0.99788	0.99788	0.99738	0.99975	0.99841	0.99309	0.9993	0.99964
0.94075	0.8925	0.97308	0.99681	0.99463	0.99827	0.99785	0.98626	0.99521	0.99681	0.99681	0.99681	0.99836	0.96483	0.99785	0.98575	0.99806	0.99848
0.94933	0.88762	0.95773	0.99859	0.9949	0.9978	0.99893	0.9757	0.99664	0.99859	0.99859	0.99859	0.99535	0.96694	0.99896	0.97438	0.9989	0.99914
0.94594	0.89435	0.96798	0.99835	0.99581	0.99872	0.99897	0.9829	0.99643	0.99835	0.99835	0.99835	0.99507	0.9676	0.99893	0.98206	0.99895	0.99925
0.9527	0.89167	0.99509	0.99674	0.99735	0.99915	0.99995	0.99505	0.99974	0.99858	0.99999	0.99999	0.99621	0.99754	0.99997	0.99924	0.99986	0.99939
0.94745	0.88182	0.99539	0.99876	0.9984	0.99689	0.99968	0.99529	0.99999	0.99944	0.99952	0.99953	0.99597	0.99623	0.99987	0.99858	0.99906	0.99751
0.97813	0.9244	0.98221	0.9935	0.99933	0.99853	0.99969	0.98245	0.99987	0.9968	0.99995	0.99995	0.99095	0.9978	0.99981	0.99328	0.99975	0.99903
0.98064	0.92848	0.9801	0.99306	0.99955	0.99861	0.99985	0.98057	0.99996	0.99648	0.99997	0.99997	0.98824	0.9979	0.99996	0.99179	0.99976	0.99898
0.98084	0.93206	0.96581	0.99756	0.99971	0.99943	0.99991	0.96935	0.99992	0.99839	0.99986	0.99986	0.99945	0.97601	0.99994	0.9806	0.99994	0.99967
0.9741	0.92381	0.98719	0.99014	0.99764	0.99987	0.99964	0.98795	0.99865	0.99447	0.99922	0.99921	0.99045	0.99937	0.99964	0.99578	0.99987	0.99992
0.96894	0.92732	0.97682	0.99251	0.9968	0.99878	0.99762	0.98182	0.99649	0.99363	0.99624	0.99624	0.9853	0.96675	0.99762	0.9894	0.99812	0.99884
0.9606	0.91706	0.98119	0.99193	0.99685	0.99861	0.99755	0.98569	0.99639	0.99328	0.99616	0.99616	0.99858	0.99981	0.99755	0.9931	0.99822	0.99879
0.95477	0.91001	0.99035	0.99027	0.99505	0.99882	0.99758	0.99187	0.9959	0.99225	0.99647	0.99646	0.99879	0.93769	0.99758	0.99741	0.99866	0.99912
0.92255	0.86143	0.99906	0.99802	0.99761	0.99983	0.99925	0.9991	0.99891	0.99766	0.99913	0.99913	0.99848	0.99953	0.99925	0.99931	0.99971	0.99985
0.93241	0.86279	0.99826	0.99843	0.99839	0.9999	0.99926	0.9986	0.99824	0.99826	0.99912	0.99912	0.99894	0.99927	0.99926	0.99883	0.99976	0.99993
0.9234	0.84966	0.99919	0.99887	0.99868	0.99995	0.99948	0.99938	0.99891	0.99875	0.99957	0.99957	0.99893	0.99921	0.99948	0.99936	0.99993	0.99997
0.9831	0.94909	0.95479	0.97187	0.9848	0.9635	0.98506	0.95356	0.98759	0.98273	0.97995	0.97998	0.96619	0.98382	0.99014	0.9684	0.9828	0.97718
0.98753	0.94574	0.95508	0.98749	0.99233	0.98949	0.99088	0.95742	0.99412	0.99194	0.99125	0.99126	0.9864	0.98841	0.99341	0.96566	0.99143	0.98715
0.97668	0.91558	0.97077	0.99322	0.99888	0.99765	0.99892	0.97334	0.99964	0.99597	0.99952	0.99952	0.99764	0.96948	0.99919	0.97952	0.99904	0.99827
0.95155	0.88358	0.97082	0.99907	0.99948	0.99916	0.99954	0.98105	0.99977	0.99943	0.99985	0.99985	0.98962	0.96368	0.99959	0.97979	0.9997	0.99949
0.94097	0.87636	0.98485	0.99653	0.99968	0.99988	0.99994	0.9902	0.99992	0.99758	0.99991	0.99991	0.99989	0.97651	0.99994	0.99053	0.99997	0.99994
0.94644	0.88324	0.98317	0.99565	0.99954	0.99983	0.99994	0.98858	0.99995	0.997	0.99995	0.99995	0.99983	0.99916	0.99994	0.9899	0.99996	0.9999
0.947	0.88119	0.99715	0.99718	0.99687	0.99871	0.99995	0.99712	0.99946	0.99859	0.99998	0.99998	0.99689	0.99758	0.99995	0.99645	0.99979	0.99905
0.95244	0.89418	0.99482	0.99494	0.99638	0.9996	0.99996	0.99483	0.99952	0.99779	0.9999	0.9999	0.99558	0.99817	0.99996	0.99922	0.99996	0.92323
0.94291	0.88369	0.99711	0.99768	0.99668	0.99989	0.99979	0.99714	0.99914	0.99789	0.99964	0.99964	0.99727	0.99879	0.99979	0.99609	0.99994	0.99994
0.94131	0.88574	0.99636	0.99752	0.99667	0.99992	0.99967	0.99644	0.99902	0.99746	0.99941	0.99941	0.99733	0.89311	0.99967	0.99693	0.99986	0.99994
0.97255	0.92579	0.96703	0.96674	0.97805	0.95772	0.9843	0.96593	0.98623	0.9776	0.97454	0.97458	0.9617	0.9793	0.98999	0.98041	0.97789	0.97039
0.97763	0.9389	0.95671	0.97316	0.98162	0.96398	0.98319	0.95614	0.9868	0.98223	0.97861	0.97863	0.96458	0.98009	0.98819	0.97119	0.98115	0.97415
0.98143	0.92451	0.96442	0.99468	0.9989	0.9969	0.9983	0.96708	0.99914	0.99723	0.9991	0.9991	0.99689	0.97452	0.99857	0.97486	0.9988	0.99796
0.97011	0.91212	0.962	0.99789	0.99909	0.99812	0.9989	0.96876	0.99938	0.99889	0.9995	0.9995	0.99814	0.97367	0.99901	0.97384	0.9993	0.99883
0.94232	0.87457	0.98535	0.99544	0.9993	0.99968	0.99986	0.99008	0.99999	0.99674	0.99999	0.99999	0.99968	0.95379	0.99988	0.99043	0.99988	0.99978
0.94086	0.87231	0.98465	0.99634	0.99953	0.99964	0.99982	0.98976	0.99998	0.99739	0.99998	0.99998	0.99964	0.95414	0.99985	0.98975	0.99986	0.99974
0.93631	0.87128	0.98836	0.99515	0.99917	0.99987	0.99996	0.99227	1	0.99672	1	1	0.99987	0.95118	0.99996	0.99304	0.99996	0.99992
0.94488	0.88444	0.99657	0.99739	0.99687	0.99946	0.99999	0.99653	0.9998	0.99858	0.99999	0.99999	0.99676	0.99782	0.99999	0.99787	0.99991	0.99962
0.95771	0.89689	0.99376	0.99633	0.99774	0.99896	0.99989	0.99371	0.99967	0.99858	0.99997	0.99997	0.99595	0.99752	0.99993	0.99853	0.99983	0.9286
0.95549	0.89432	0.9943	0.99765	0.99769	0.9995	0.99925	0.99436	0.99807	0.99788	0.99896	0.99896	0.99765	0.99882	0.99925	0.9949	0.99956	0.99973
0.9448	0.88725	0.99622	0.99753	0.99683	0.99989	0.99981	0.99626	0.99918	0.99784	0.99961	0.99961	0.99721	0.99885	0.99981	0.99721	0.99993	0.99994
0.98867	0.94904	0.94822	0.98801	0.99104	0.98795	0.98902	0.95217	0.99255	0.99135	0.98968	0.98969	0.98485	0.98723	0.99176	0.95916	0.99022	0.98594
0.97169	0.90939	0.96815	0.99608	0.99946	0.99832	0.99916	0.97335	0.99967	0.9976	0.99967	0.99967	0.99833	0.97067	0.99931	0.97659	0.99937	0.99887
0.95231	0.89531	0.97967	0.99573	0.99966	0.99975	0.99987	0.98515	0.99981	0.99733	0.9998	0.9998	0.99976	0.97056	0.99988	0.9897	0.99992	0.99987
0.94311	0.88466	0.98404	0.99563	0.99954	0.99989	0.99995	0.98915	0.99991	0.99734	0.9999	0.9999	0.9999	0.99928	0.99995	0.99224	0.99997	0.99994
0.94631	0.89249	0.99258	0.99119	0.99608	0.99992	0.99997	0.99308	0.9997	0.99644	0.99984	0.99984	0.99376	0.90135	0.99997	0.99956	0.99998	0.99995
0.94472	0.89119	0.99356	0.99169	0.99561	0.99993	0.99995	0.99395	0.99966	0.99645	0.99982	0.99982	0.994	0.89987	0.99995	0.99963	0.99998	0.99996
0.94111	0.87641	0.9978	0.99821	0.99763	0.99985	0.99948	0.99783	0.99845	0.9981	0.99935	0.99935	0.99815	0.99896	0.99948	0.99211	0.99984	0.99992
0.93995	0.87835	0.99765	0.99845	0.99774	0.9999	0.99978	0.99765	0.99913	0.99838	0.99963	0.99963	0.99821	0.9988	0.99978	0.99421	0.99995	0.99995
0.93011	0.86058	0.99289	0.99424	0.99842	0.99998	0.99999	0.99534	0.99995	0.99584	0.99996	0.99995	0.99998	0.99962	0.99999	0.99526	0.99999	0.99999
0.98764	0.9494	0.95751	0.97962	0.98938	0.9701	0.98858	0.95666	0.99122	0.98699	0.98474	0.98476	0.97237	0.98797	0.99233	0.97319	0.9871	0.98157
0.96584	0.91308	0.97419	0.96512	0.97577	0.95889	0.98628	0.97352	0.98781	0.9776	0.97502	0.97507	0.96373	0.97953	0.99175	0.98649	0.97852	0.97111
0.97649	0.91823	0.96796	0.99522	0.9993	0.99793	0.99895	0.97134	0.99954	0.99715	0.99952	0.99952	0.99793	0.97196	0.99912	0.97786	0.99926	0.99866
0.95408	0.89437	0.97289	0.99791	0.99983	0.99943	0.99973	0.98085	0.9999	0.99862	0.99993	0.99993	0.989	0.97823	0.99976	0.98348	0.99983	0.99965
0.95103	0.89381	0.98311	0.99393	0.99916	0.99977	0.99994	0.98674	0.99995	0.99658	0.99996	0.99996	0.99977	0.99886	0.99994	0.99339	0.99996	0.99986
0.95712	0.90031	0.99251	0.99116	0.99644	0.99951	0.99994	0.99259	0.99966	0.99688	0.99993	0.99993	0.99363	0.99809	0.99994	0.99918	0.99993	0.99968
0.92981	0.85844	0.99822	0.99917	0.99858	0.99855	0.99993	0.99851	0.99951	0.99939	0.99995	0.99995	0.99748	0.99829	0.99993	0.99884	0.99976	0.99893
0.93988	0.87405	0.99822	0.99858	0.99773	0.99965	0.99989	0.99822	0.99929	0.99884	0.99987	0.99987	0.99821	0.99832	0.99989	0.99355	0.99998	0.99977
0.94655	0.88678	0.99593	0.99837	0.99796	0.9998	0.99992	0.99592	0.99939	0.99863	0.99977	0.99977	0.99799	0.99853	0.99992	0.99714	0.99997	0.99988
0.94022	0.88089	0.98852	0.99276	0.99837	0.99988	0.99997	0.99174	0.99998	0.99595	0.99999	0.99999	0.99988	0.99914	0.99998	0.99557	0.99997	0.99992
0.98818	0.95185	0.95756	0.97888	0.98967	0.97024	0.98915	0.95682	0.99161	0.98737	0.98517	0.98519	0.9726	0.9887	0.99318	0.9717	0.98759	0.98217
0.98966	0.94914	0.94728	0.99078	0.99114	0.98957	0.98828	0.95271	0.99181	0.99113	0.98953	0.98954	0.98705	0.98667	0.99081	0.9596	0.98974	0.98558
0.96648	0.9017	0.96884	0.9975	0.99956	0.99881	0.99934	0.97644	0.99969	0.99837	0.99972	0.99972	0.99884	0.99827	0.99942	0.9763	0.99958	0.99929
0.9704	0.91245	0.97194	0.99551	0.99953	0.9987	0.99943	0.9752	0.99981	0.99715	0.99982	0.99982	0.9987	0.96732	0.99954	0.98369	0.99959	0.99914
0.96498	0.90697	0.97635	0.9949	0.99956	0.99909	0.99967	0.97911	0.99994	0.99687	0.99994	0.99994	0.98725	0.99792	0.99974	0.98883	0.99973	0.99937
0.96829	0.91013	0.97695	0.99452	0.9993	0.99861	0.99946	0.97828	0.99991	0.99692	0.99987	0.99987	0.98936	0.99723	0.99958	0.99049	0.99952	0.99897
0.95938	0.90168	0.98448	0.99089	0.99824	0.9993	0.99981	0.98576	0.99999	0.99483	0.99998	0.99998	0.98674	0.99795	0.99981	0.99502	0.9998	0.9995
0.95007	0.88584	0.99615	0.99812	0.99801	0.9991	0.99994	0.99611	0.99949	0.99911	0.99997	0.99997	0.99908	0.99779	0.99994	0.99872	0.99989	0.99937
0.95796	0.90011	0.99327	0.99659	0.99741	0.99959	0.99958	0.99334	0.99864	0.99777	0.99931	0.99931	0.99679	0.99872	0.99958	0.99785	0.99975	0.99978
0.94114	0.88536	0.98988	0.9916	0.99753	0.99987	0.99998	0.99185	0.99997	0.99634	0.99999	0.99999	0.99987	0.99902	0.99998	0.99807	0.99997	0.99991
0.98296	0.94271	0.95442	0.98188	0.98772	0.97335	0.98697	0.95573	0.9907	0.98826	0.98532	0.98534	0.97323	0.98481	0.99032	0.97083	0.98687	0.9811
0.9784	0.93368	0.96663	0.97967	0.98763	0.97551	0.99076	0.96716	0.99347	0.98899	0.98703	0.98705	0.97592	0.98701	0.99331	0.98061	0.98857	0.98286
0.97678	0.92225	0.95559	0.99745	0.99794	0.99685	0.9979	0.96165	0.99864	0.9989	0.99885	0.99885	0.99687	0.97823	0.99808	0.96857	0.99824	0.99816
0.977	0.92004	0.96731	0.99582	0.99933	0.99768	0.99886	0.96944	0.99952	0.99777	0.99954	0.99954	0.99767	0.99689	0.99904	0.98093	0.99915	0.99838
0.963	0.90767	0.97642	0.99579	0.9997	0.99949	0.99973	0.98021	0.99976	0.99758	0.99976	0.99976	0.9903	0.9622	0.99973	0.98868	0.99984	0.99973
0.96088	0.90687	0.98854	0.99141	0.99758	0.99969	0.99979	0.98905	0.99922	0.99653	0.99952	0.99952	0.99301	0.99885	0.99979	0.99784	0.99984	0.99983
0.93995	0.87835	0.99765	0.99845	0.99774	0.9999	0.99978	0.99765	0.99913	0.99838	0.99963	0.99963	0.99821	0.9988	0.99978	0.99421	0.99995	0.99995
0.94215	0.88247	0.99687	0.9984	0.99779	0.9999	0.99981	0.99688	0.99919	0.99835	0.99961	0.99961	0.99819	0.99884	0.99981	0.99572	0.99994	0.99995
0.95489	0.89975	0.99228	0.9965	0.99762	0.99978	0.99968	0.99244	0.99894	0.99758	0.99934	0.99934	0.99685	0.99897	0.99968	0.99846	0.99981	0.99988
0.93734	0.8753	0.98958	0.99328	0.99848	0.99992	0.99998	0.99288	0.99998	0.99581	0.99998	0.99998	0.98628	0.99932	0.99998	0.99489	0.99998	0.99995
0.98287	0.94261	0.95744	0.98114	0.9886	0.97527	0.98794	0.95619	0.99151	0.98838	0.98649	0.9865	0.97491	0.98494	0.99151	0.97016	0.98725	0.98141
0.98719	0.9414	0.96384	0.98869	0.99514	0.99364	0.99354	0.9678	0.99622	0.99299	0.9941	0.99411	0.99174	0.99064	0.99537	0.97384	0.9938	0.9901
0.95477	0.89013	0.96362	0.99884	0.99876	0.99851	0.99909	0.97534	0.99939	0.99944	0.99965	0.99965	0.99855	0.96765	0.99917	0.9749	0.99933	0.99895
0.97197	0.91309	0.98454	0.99318	0.99822	0.99628	0.9989	0.98438	0.99981	0.99753	0.99931	0.99931	0.9962	0.99523	0.9989	0.99548	0.99866	0.99703
0.96809	0.9102	0.98079	0.99224	0.9989	0.99875	0.99961	0.98167	0.99996	0.99553	0.99992	0.99992	0.98655	0.99735	0.99973	0.9927	0.99961	0.99909
0.95045	0.89226	0.9804	0.99558	0.99966	0.99969	0.9999	0.98537	0.99999	0.99736	0.99999	0.99999	0.99969	0.95726	0.9999	0.9909	0.99993	0.9998
0.96347	0.90868	0.98749	0.99176	0.998	0.99959	0.99986	0.98792	0.99947	0.99678	0.99971	0.99971	0.99296	0.99857	0.99986	0.99746	0.99989	0.99977
0.94809	0.88518	0.99668	0.99725	0.99652	0.99971	0.99921	0.99677	0.99787	0.99747	0.99912	0.99911	0.99708	0.99895	0.99921	0.99378	0.99971	0.99985
0.9538	0.89827	0.99144	0.99628	0.99798	0.99981	0.99994	0.99158	0.99955	0.99809	0.99976	0.99976	0.99685	0.99869	0.99994	0.99922	0.99996	0.99989
0.96036	0.89938	0.99245	0.99765	0.99802	0.99907	0.99941	0.99253	0.99846	0.99843	0.99929	0.99929	0.99902	0.99846	0.99941	0.99505	0.99958	0.99949
0.97793	0.92599	0.97244	0.97945	0.98726	0.97176	0.991	0.97178	0.99309	0.98661	0.98468	0.9847	0.97413	0.9873	0.99412	0.98702	0.98675	0.98037
0.98142	0.93634	0.96622	0.98274	0.99206	0.98159	0.99239	0.96717	0.99522	0.99152	0.99103	0.99104	0.98136	0.9888	0.99498	0.97914	0.99119	0.98601
0.98481	0.92811	0.97032	0.98806	0.99761	0.99312	0.99684	0.97032	0.99851	0.99426	0.99768	0.99768	0.99301	0.99332	0.99769	0.98145	0.99679	0.99451
0.96572	0.90794	0.99025	0.9937	0.99792	0.999	0.99977	0.99028	0.99954	0.99787	0.99989	0.99989	0.99898	0.99781	0.99977	0.99772	0.99981	0.99936
0.96067	0.89831	0.98884	0.99765	0.99799	0.99782	0.99931	0.99094	0.99986	0.99893	0.99924	0.99924	0.99672	0.99657	0.99931	0.99528	0.99878	0.99666
0.97554	0.91724	0.97544	0.99421	0.99908	0.99691	0.99864	0.97552	0.99957	0.99749	0.99937	0.99937	0.98946	0.99558	0.99864	0.99001	0.99874	0.99756
0.96903	0.91308	0.98745	0.9919	0.99813	0.99907	0.99972	0.98761	0.99955	0.99688	0.99984	0.99984	0.99256	0.99797	0.99972	0.99683	0.9998	0.99944
0.95808	0.90125	0.99279	0.99649	0.99743	0.99962	0.99951	0.99289	0.99853	0.99755	0.99917	0.99916	0.99682	0.99884	0.99951	0.99741	0.9997	0.9998
0.9538	0.89827	0.99144	0.99628	0.99798	0.99981	0.99994	0.99158	0.99955	0.99809	0.99976	0.99976	0.99685	0.99869	0.99994	0.99922	0.99996	0.99989
0.93409	0.86727	0.99091	0.99419	0.99864	0.99994	0.99999	0.99399	0.99997	0.99595	0.99998	0.99998	0.99995	0.94866	0.99999	0.99435	0.99999	0.99997
0.97623	0.93095	0.96326	0.97554	0.98309	0.96558	0.98554	0.96252	0.98867	0.98332	0.97994	0.97996	0.96701	0.98204	0.98936	0.97934	0.98252	0.9755
0.98134	0.93502	0.96787	0.98329	0.99318	0.98485	0.99345	0.96941	0.99609	0.99239	0.99244	0.99245	0.98345	0.9898	0.99571	0.98057	0.99234	0.98747
0.97924	0.92181	0.97281	0.9925	0.99886	0.99763	0.99899	0.97424	0.99965	0.99557	0.99955	0.99955	0.99761	0.99682	0.99923	0.9833	0.99917	0.99835
0.95331	0.88829	0.98137	0.9949	0.99939	0.99965	0.99988	0.98656	0.99998	0.99635	0.99998	0.99998	0.98207	0.9734	0.99991	0.98798	0.99991	0.99977
0.96132	0.90491	0.9808	0.99385	0.99932	0.99956	0.99986	0.98307	0.99991	0.99663	0.99994	0.99994	0.98983	0.99852	0.99986	0.9929	0.99991	0.99973
0.95925	0.90392	0.98434	0.99308	0.99882	0.99971	0.9999	0.98575	0.99978	0.99686	0.99986	0.99986	0.99971	0.99871	0.9999	0.99598	0.99994	0.99984
0.9663	0.91085	0.98825	0.99357	0.9982	0.99937	0.99977	0.98845	0.99927	0.99766	0.99962	0.99962	0.9949	0.9984	0.99977	0.99739	0.99982	0.99965
0.95156	0.89485	0.99449	0.99699	0.99711	0.9998	0.99962	0.99457	0.99874	0.99753	0.99931	0.99931	0.99701	0.99896	0.99962	0.99752	0.99981	0.9999
0.94588	0.89202	0.99049	0.99364	0.99754	0.99994	0.99996	0.99154	0.99973	0.9972	0.99982	0.99982	0.99994	0.90124	0.99996	0.99909	0.99998	0.99997
0.96132	0.90491	0.9808	0.99385	0.99932	0.99956	0.99986	0.98307	0.99991	0.99663	0.99994	0.99994	0.98983	0.99852	0.99986	0.9929	0.99991	0.99973
0.96935	0.91429	0.97619	0.97178	0.98074	0.96449	0.98903	0.97556	0.99034	0.9811	0.97894	0.97898	0.96812	0.9831	0.99327	0.988	0.98182	0.97453
0.9707	0.91711	0.97483	0.97332	0.98183	0.96599	0.98915	0.9742	0.9908	0.98251	0.98013	0.98016	0.96909	0.98366	0.99293	0.98766	0.9829	0.97581
0.98648	0.93163	0.96864	0.98905	0.99779	0.9934	0.99685	0.96876	0.99847	0.99491	0.99783	0.99783	0.99329	0.99398	0.99759	0.97976	0.99716	0.99505
0.95344	0.89398	0.9826	0.99337	0.99903	0.99969	0.99992	0.9864	0.99997	0.99575	0.99998	0.99998	0.99969	0.99874	0.99992	0.99164	0.99993	0.9998
0.93756	0.87139	0.98372	0.99801	0.99993	0.99983	0.99992	0.98973	0.99996	0.99861	0.99995	0.99995	0.99984	0.99932	0.99993	0.98949	0.99996	0.99991
0.96204	0.90595	0.98271	0.99363	0.99914	0.99953	0.99987	0.98399	0.9999	0.99698	0.99995	0.99995	0.99254	0.99837	0.99987	0.99509	0.99991	0.9997
0.95568	0.8967	0.99404	0.99666	0.99749	0.99959	0.99988	0.99405	0.99926	0.99829	0.99976	0.99976	0.99661	0.99833	0.99988	0.99863	0.99993	0.99975
0.94297	0.89084	0.99364	0.99699	0.99708	0.99989	0.99961	0.99403	0.99903	0.99718	0.99926	0.99926	0.99989	0.99946	0.99961	0.99921	0.99978	0.99988
0.94239	0.8892	0.99229	0.99674	0.99761	0.99996	0.99994	0.99293	0.99967	0.99786	0.99976	0.99976	0.99996	0.99925	0.99994	0.99965	0.99997	0.99998
0.92431	0.85203	0.99226	0.99698	0.99947	0.99995	0.99999	0.99494	0.99998	0.9978	0.99998	0.99998	0.99996	0.99959	0.99999	0.99459	0.99999	0.99998
0.98416	0.9439	0.95601	0.98213	0.9895	0.97846	0.98872	0.95606	0.99225	0.98976	0.98773	0.98774	0.97664	0.98607	0.99195	0.96954	0.98858	0.98319
0.9664	0.90592	0.964	0.99834	0.99916	0.99847	0.99904	0.97286	0.99945	0.99903	0.99956	0.99956	0.99852	0.97215	0.99912	0.97383	0.99944	0.99915
0.96865	0.91287	0.97872	0.99492	0.99961	0.99921	0.99971	0.97995	0.9999	0.99738	0.99992	0.99992	0.99234	0.99812	0.99975	0.99246	0.99981	0.9995
0.93963	0.87533	0.98039	0.99846	0.99993	0.99972	0.99988	0.98758	0.99996	0.99896	0.99998	0.99998	0.99973	0.98098	0.99989	0.98761	0.99992	0.99983
0.96364	0.90917	0.98403	0.99429	0.99903	0.99961	0.99984	0.98489	0.99957	0.99762	0.99968	0.99968	0.99475	0.99872	0.99984	0.99627	0.99988	0.99979
0.96435	0.90892	0.98796	0.99167	0.99795	0.99948	0.99985	0.98825	0.99956	0.99684	0.99981	0.99981	0.99301	0.99834	0.99985	0.99763	0.99989	0.9997
0.94593	0.87867	0.99511	0.99732	0.99677	0.999	0.99986	0.99638	0.99945	0.99865	0.99982	0.99983	0.99791	0.99779	0.99986	0.99628	0.99954	0.99839
0.95198	0.88734	0.99432	0.99796	0.99803	0.99892	0.99978	0.99508	0.99909	0.99914	0.99989	0.99989	0.99889	0.99817	0.99978	0.99552	0.99983	0.99928
0.95477	0.89937	0.99161	0.99392	0.9973	0.99978	0.99994	0.99179	0.99954	0.99749	0.99979	0.99979	0.9954	0.99863	0.99994	0.99918	0.99996	0.99987
0.94242	0.87152	0.98725	0.99584	0.9993	0.99989	0.99994	0.99174	0.99985	0.99686	0.99986	0.99986	0.9999	0.9995	0.99994	0.99103	0.99996	0.99995
0.98488	0.94356	0.95557	0.98471	0.99049	0.98026	0.98937	0.95659	0.99286	0.99089	0.98877	0.98878	0.97811	0.987	0.9922	0.97056	0.98958	0.98445
0.98766	0.93229	0.96442	0.98861	0.99718	0.99212	0.99593	0.96458	0.99779	0.99456	0.99704	0.99704	0.99201	0.99296	0.99687	0.97533	0.99625	0.99392
0.97092	0.90977	0.97352	0.99339	0.99883	0.99808	0.99913	0.97612	0.99976	0.99595	0.99965	0.99965	0.99807	0.99685	0.99934	0.98334	0.9992	0.99854
0.97096	0.914	0.9824	0.99346	0.99912	0.9986	0.99961	0.98263	0.99994	0.99677	0.99991	0.99991	0.99173	0.99724	0.99961	0.99483	0.99963	0.95059
0.9491	0.88805	0.98145	0.99549	0.99958	0.99974	0.99992	0.98685	0.99997	0.99701	0.99998	0.99998	0.99975	0.95782	0.99992	0.98971	0.99994	0.99984
0.95463	0.90007	0.99143	0.99105	0.99665	0.99981	0.99991	0.99175	0.99946	0.99654	0.99974	0.99974	0.99346	0.99878	0.99991	0.99905	0.99995	0.9999
0.94608	0.88155	0.9971	0.99839	0.9978	0.99965	0.99979	0.99709	0.99898	0.99871	0.99974	0.99974	0.99774	0.99847	0.99979	0.99482	0.99995	0.99979
0.94143	0.87512	0.9979	0.9984	0.99769	0.99978	0.99961	0.99793	0.99864	0.99847	0.99959	0.99959	0.99789	0.99876	0.99961	0.99238	0.99992	0.99988
0.94866	0.89111	0.99502	0.99792	0.99783	0.99983	0.99956	0.99508	0.99868	0.99786	0.99919	0.99919	0.99807	0.99907	0.99956	0.99868	0.99977	0.9999
0.94453	0.87973	0.98595	0.99486	0.99917	0.99989	0.99995	0.99061	0.99987	0.99636	0.99988	0.99988	0.9999	0.99938	0.99995	0.99129	0.99997	0.99995
0.98399	0.93636	0.96464	0.99152	0.9952	0.99159	0.99402	0.968	0.99663	0.99492	0.99435	0.99436	0.98852	0.99117	0.99558	0.97946	0.99409	0.99003
0.98949	0.9427	0.96131	0.99148	0.99712	0.99407	0.99495	0.96649	0.99636	0.99541	0.99624	0.99624	0.99313	0.99262	0.99519	0.9752	0.99495	0.99332
0.98313	0.92636	0.96377	0.99377	0.9985	0.99529	0.99749	0.96457	0.99871	0.99703	0.99858	0.99858	0.99525	0.9949	0.99793	0.97763	0.99787	0.9964
0.97249	0.91495	0.9812	0.99361	0.99899	0.99809	0.9994	0.98132	0.99991	0.9969	0.99982	0.99982	0.99099	0.99669	0.99958	0.99403	0.99941	0.95174
0.95372	0.89162	0.97925	0.99538	0.99958	0.99952	0.99982	0.98461	0.99998	0.99685	0.99998	0.99998	0.98444	0.97195	0.99986	0.98782	0.99985	0.99968
0.95445	0.89533	0.99507	0.99505	0.99625	0.99961	0.99982	0.9951	0.99908	0.99769	0.99974	0.99974	0.9996	0.99837	0.99982	0.99862	0.99993	0.99977
0.94755	0.88974	0.99535	0.99537	0.99609	0.99958	0.99998	0.99533	0.99979	0.99786	0.99998	0.99998	0.99582	0.99805	0.99998	0.99908	0.99994	0.99971
0.93843	0.86975	0.99798	0.99852	0.99769	0.99972	0.9996	0.99835	0.99865	0.99867	0.99971	0.99971	0.99837	0.99873	0.99961	0.99143	0.99995	0.99983
0.94674	0.88743	0.99602	0.99801	0.99773	0.99984	0.99955	0.99605	0.99861	0.99791	0.99922	0.99922	0.99811	0.99903	0.99955	0.99556	0.99979	0.99991
0.92901	0.86558	0.99352	0.99293	0.99796	0.99999	0.99999	0.99572	0.99992	0.9955	0.99993	0.99993	0.98597	0.99968	0.99999	0.99659	0.99999	0.99999
0.97593	0.92865	0.97267	0.98103	0.98948	0.97756	0.99205	0.97298	0.99447	0.98823	0.98829	0.98831	0.97782	0.98729	0.9952	0.98432	0.98849	0.9822
0.98294	0.92346	0.97111	0.98842	0.99769	0.99464	0.99747	0.97147	0.99887	0.99405	0.99826	0.99826	0.99458	0.99396	0.99817	0.98162	0.99739	0.99565
0.97007	0.91093	0.97593	0.99345	0.99896	0.99826	0.99928	0.97747	0.99985	0.99616	0.99976	0.99976	0.98327	0.9969	0.99945	0.9881	0.99934	0.99869
0.96675	0.90798	0.98574	0.99405	0.99857	0.9981	0.99944	0.98562	0.99996	0.99734	0.99981	0.99981	0.99806	0.99641	0.99963	0.99731	0.99937	0.94847
0.9648	0.90716	0.98606	0.99399	0.99879	0.99887	0.99973	0.9861	0.99998	0.99741	0.99996	0.99996	0.99885	0.9973	0.99983	0.99749	0.99971	0.99918
0.95999	0.9038	0.98956	0.99129	0.99748	0.9995	0.99992	0.98976	0.99977	0.99673	0.99994	0.99994	0.99325	0.99814	0.99994	0.99853	0.99992	0.99967
0.95845	0.90307	0.99054	0.98877	0.99655	0.99965	0.99993	0.99084	0.99964	0.99562	0.99988	0.99988	0.9909	0.99841	0.99993	0.99866	0.99994	0.99978
0.95936	0.90462	0.99017	0.99366	0.99763	0.99971	0.9998	0.99044	0.99919	0.99729	0.99953	0.99953	0.9952	0.99879	0.9998	0.99846	0.99986	0.99984
0.95085	0.89315	0.98176	0.99477	0.99944	0.99973	0.99992	0.98602	0.99997	0.99696	0.99998	0.99998	0.99973	0.99881	0.99992	0.99217	0.99994	0.99983
0.96319	0.898	0.98074	0.99212	0.99863	0.99916	0.9997	0.98416	0.99998	0.99433	0.99994	0.99994	0.99916	0.99801	0.99979	0.98722	0.9997	0.9994
0.98011	0.9381	0.96285	0.97972	0.98769	0.97411	0.98873	0.96355	0.99193	0.98764	0.98581	0.98583	0.97401	0.98507	0.9925	0.97579	0.98687	0.98066
0.98604	0.92993	0.96914	0.9894	0.99807	0.99435	0.99735	0.96948	0.99879	0.99485	0.99826	0.99826	0.99427	0.99442	0.99801	0.98011	0.99756	0.99572
0.96503	0.90435	0.96813	0.99674	0.99947	0.99837	0.99915	0.97367	0.99967	0.99813	0.9997	0.9997	0.98471	0.96807	0.99928	0.97966	0.99931	0.99879
0.95422	0.89623	0.98066	0.99466	0.99945	0.99957	0.99987	0.98441	0.99999	0.99689	0.99999	0.99999	0.99957	0.99851	0.99986	0.99189	0.99989	0.99971
0.94813	0.88647	0.98029	0.99635	0.99977	0.9997	0.99989	0.98637	0.99998	0.99756	0.99998	0.99998	0.99971	0.9989	0.99991	0.98855	0.99992	0.99981
0.96031	0.90484	0.98566	0.99031	0.99799	0.99967	0.9999	0.98691	0.99975	0.99491	0.99987	0.99987	0.98674	0.99864	0.9999	0.99575	0.99993	0.99981
0.95485	0.89747	0.99465	0.99534	0.99591	0.99965	0.99926	0.99476	0.99802	0.99673	0.999	0.99899	0.99964	0.99894	0.99926	0.99665	0.99964	0.9998
0.95582	0.89879	0.99311	0.9966	0.9976	0.99972	0.99981	0.99318	0.99912	0.99797	0.99958	0.99958	0.99686	0.99866	0.99981	0.99832	0.99989	0.99985
0.94569	0.88683	0.98568	0.99368	0.99891	0.99991	0.99996	0.98981	0.99985	0.99612	0.99987	0.99987	0.99991	0.9993	0.99996	0.99344	0.99997	0.99995
0.95949	0.89934	0.98697	0.98747	0.99678	0.99957	0.99992	0.98864	0.99994	0.99144	0.99999	0.99999	0.99957	0.99843	0.99996	0.99417	0.9999	0.99971
0.97018	0.91843	0.97231	0.97084	0.97992	0.96303	0.98706	0.97155	0.98924	0.98095	0.9781	0.97813	0.96649	0.98184	0.99139	0.9859	0.98119	0.97398
0.98612	0.94777	0.95063	0.98352	0.98946	0.98174	0.98822	0.95164	0.99188	0.99011	0.98788	0.98789	0.97698	0.98613	0.9914	0.96362	0.98885	0.98394
0.97523	0.91751	0.9583	0.997	0.99845	0.99688	0.99816	0.9623	0.99894	0.99858	0.99912	0.99912	0.99688	0.9747	0.99838	0.97268	0.99774	0.99771
0.96086	0.90485	0.98255	0.99298	0.999	0.99962	0.99988	0.98438	0.99986	0.99632	0.99991	0.99991	0.98981	0.99858	0.99988	0.99419	0.99992	0.99977
0.98557	0.93534	0.96071	0.99614	0.99817	0.99578	0.99739	0.96221	0.99846	0.99841	0.99857	0.99857	0.99572	0.97389	0.99768	0.97652	0.99842	0.9975
0.9727	0.91564	0.98564	0.99072	0.99822	0.99812	0.99955	0.98572	0.9999	0.99552	0.99983	0.99983	0.98865	0.99693	0.99955	0.99554	0.99952	0.99866
0.95701	0.89438	0.99404	0.99645	0.99749	0.99866	0.99979	0.99404	0.99925	0.99872	0.9999	0.9999	0.99863	0.99785	0.99979	0.9965	0.99977	0.99909
0.9548	0.89421	0.995	0.99697	0.99708	0.99958	0.9996	0.99503	0.99858	0.99799	0.99946	0.99946	0.99665	0.99862	0.9996	0.99637	0.99981	0.99977
0.94179	0.88891	0.99342	0.99502	0.99646	0.99996	0.99992	0.99393	0.99962	0.99714	0.99975	0.99975	0.99996	0.99924	0.99992	0.99964	0.99996	0.99998
0.94105	0.87372	0.98795	0.99509	0.99908	0.99991	0.99995	0.99217	0.9998	0.99641	0.99982	0.99982	0.99992	0.97531	0.99995	0.99208	0.99995	0.99996
0.97793	0.93634	0.95967	0.97541	0.98306	0.96565	0.98437	0.95916	0.98787	0.98308	0.97977	0.97979	0.9662	0.98109	0.98907	0.97443	0.98202	0.97489
0.98604	0.92993	0.96914	0.9894	0.99807	0.99435	0.99735	0.96948	0.99879	0.99485	0.99826	0.99826	0.99427	0.99442	0.99801	0.98011	0.99756	0.99572
0.96444	0.90377	0.96123	0.99824	0.9989	0.99819	0.99894	0.9702	0.99941	0.99913	0.99958	0.99958	0.99822	0.97196	0.99906	0.97276	0.99925	0.99876
0.95055	0.89089	0.97871	0.99623	0.99977	0.99959	0.99984	0.98454	0.99998	0.99758	0.99998	0.99998	0.99959	0.95943	0.99987	0.98859	0.99988	0.99972
0.95499	0.89693	0.98195	0.99341	0.9991	0.99957	0.99988	0.98516	0.99999	0.99601	0.99999	0.99999	0.99957	0.99849	0.99991	0.99233	0.99989	0.99971
0.947	0.88119	0.99715	0.99718	0.99687	0.99871	0.99995	0.99712	0.99946	0.99859	0.99998	0.99998	0.99689	0.99758	0.99995	0.99645	0.99979	0.99905
0.94856	0.88822	0.99559	0.9983	0.99804	0.99967	0.99996	0.99556	0.99952	0.99881	0.99987	0.99987	0.99776	0.99827	0.99996	0.99753	0.99997	0.99979
0.93849	0.87303	0.99835	0.99859	0.99773	0.99978	0.99983	0.99835	0.99918	0.99868	0.99979	0.99979	0.99796	0.99853	0.99983	0.99286	0.99998	0.99986
0.94735	0.89246	0.99412	0.99711	0.99722	0.9999	0.99981	0.99425	0.99923	0.99769	0.99954	0.99954	0.99709	0.9003	0.99981	0.99868	0.99991	0.99995
0.93712	0.8726	0.99227	0.99075	0.99711	0.99997	0.99999	0.99469	0.99994	0.99381	0.99996	0.99996	0.99997	0.9995	0.99999	0.99598	1	0.99998
0.98106	0.92674	0.95789	0.99657	0.99832	0.99647	0.99779	0.96117	0.99865	0.99851	0.9988	0.9988	0.99646	0.97719	0.99802	0.97167	0.99769	0.99778
0.94986	0.87991	0.9812	0.99669	0.99972	0.99966	0.99986	0.98736	0.99997	0.99756	0.99997	0.99997	0.99967	0.95805	0.99989	0.98658	0.9999	0.99979
0.93163	0.85636	0.99231	0.99532	0.99878	0.99995	0.99999	0.99497	0.99997	0.99644	0.99997	0.99997	0.99996	0.86868	0.99999	0.99436	0.99999	0.99998
0.96512	0.90325	0.98588	0.98443	0.99459	0.99616	0.99826	0.9858	0.99942	0.99208	0.99872	0.99872	0.99606	0.99411	0.99877	0.99531	0.998	0.9968
0.93431	0.8612	0.99747	0.99839	0.99729	0.99799	0.99987	0.99817	0.99941	0.99914	0.99975	0.99976	0.99852	0.99841	0.99987	0.9948	0.99955	0.99836
0.93688	0.85948	0.9862	0.99652	0.99899	0.99915	0.9994	0.99053	0.99971	0.99749	0.9997	0.9997	0.99915	0.9796	0.99945	0.98959	0.9995	0.99934
0.94709	0.89104	0.99295	0.9879	0.99511	0.99949	0.9999	0.99318	0.99999	0.99547	0.99999	0.99999	0.99164	0.99805	0.9999	0.99976	0.99985	0.92798
0.98837	0.93828	0.96742	0.98901	0.99829	0.9948	0.99671	0.97064	0.99781	0.99447	0.99766	0.99766	0.9942	0.99373	0.99706	0.97477	0.99633	0.99443
0.9556	0.87868	0.99267	0.98737	0.99233	0.98717	0.99841	0.99254	0.99902	0.9915	0.9936	0.99363	0.98959	0.99509	0.99841	0.99981	0.99435	0.99094
0.96284	0.88884	0.98905	0.99305	0.99598	0.99135	0.99887	0.9892	0.99964	0.99575	0.99662	0.99664	0.99247	0.99661	0.99887	0.99925	0.99698	0.99403
0.97727	0.92278	0.97887	0.99348	0.99922	0.99839	0.9993	0.97942	0.9997	0.99639	0.99973	0.99973	0.99836	0.99765	0.99944	0.99132	0.99955	0.99903
0.96534	0.9063	0.97909	0.9928	0.99912	0.99923	0.99975	0.98182	0.99996	0.99513	0.99994	0.99994	0.99923	0.99814	0.99982	0.98868	0.99979	0.99949
0.97173	0.90815	0.97011	0.99154	0.99776	0.99584	0.99752	0.97169	0.9987	0.99562	0.99841	0.99841	0.97559	0.99433	0.99791	0.98116	0.99764	0.9965
0.95706	0.89425	0.99212	0.99641	0.996	0.99575	0.99768	0.99309	0.99898	0.99647	0.9975	0.9975	0.99458	0.99224	0.99886	0.99889	0.99561	0.99351
0.95563	0.89428	0.99466	0.99655	0.99748	0.99911	0.99991	0.99463	0.99955	0.99861	0.99996	0.99996	0.99607	0.99771	0.99991	0.99863	0.99988	0.92553
0.94702	0.88072	0.99645	0.99814	0.99791	0.99884	0.99989	0.99649	0.99929	0.99917	0.99996	0.99996	0.99751	0.998	0.99989	0.99561	0.99985	0.99918
0.94715	0.88376	0.99677	0.99834	0.99783	0.99971	0.99977	0.99677	0.99895	0.9986	0.99967	0.99967	0.99775	0.99855	0.99977	0.99522	0.99993	0.99983
0.9082	0.83427	0.99885	0.99267	0.99642	0.9999	0.99988	0.99924	0.99895	0.99449	0.99985	0.99985	0.98335	0.97291	0.99988	0.99914	0.99992	0.99993
0.95705	0.89778	0.99398	0.99166	0.99599	0.99898	0.99993	0.99396	0.99979	0.99682	0.99999	0.99999	0.99896	0.99734	0.99993	0.99916	0.9998	0.99926
0.93843	0.86975	0.99798	0.99852	0.99769	0.99972	0.9996	0.99835	0.99865	0.99867	0.99971	0.99971	0.99837	0.99873	0.99961	0.99143	0.99995	0.99983
0.96789	0.91168	0.97876	0.99302	0.99922	0.99929	0.99969	0.98108	0.99981	0.99543	0.99987	0.99987	0.98153	0.99842	0.99969	0.98943	0.99981	0.99959
0.96787	0.91219	0.98618	0.98945	0.99781	0.99923	0.99979	0.98661	0.99973	0.9946	0.99991	0.99991	0.98716	0.99803	0.99985	0.99604	0.99984	0.99952
0.95688	0.89437	0.99425	0.9965	0.99735	0.99896	0.99974	0.99428	0.99898	0.99866	0.99982	0.99982	0.99698	0.99811	0.99974	0.99663	0.99981	0.99934
0.94603	0.88402	0.99664	0.99841	0.9979	0.99965	0.99995	0.99661	0.99946	0.99883	0.99987	0.99987	0.99775	0.99824	0.99995	0.99654	0.99997	0.99977
0.94323	0.88377	0.98601	0.99366	0.99885	0.99975	0.99991	0.98974	1	0.99634	1	1	0.99974	0.99886	0.99991	0.99419	0.99992	0.99983
0.92855	0.85856	0.99545	0.99008	0.99614	0.99989	0.99994	0.99679	0.99999	0.99305	0.99999	0.99999	0.99989	0.99944	0.99995	0.9971	0.99995	0.99992
0.93721	0.88574	0.99533	0.99354	0.99456	0.99997	0.99984	0.99576	0.99953	0.99609	0.99967	0.99967	0.99997	0.99943	0.99984	0.99942	0.99993	0.99997
0.94418	0.88814	0.99558	0.99587	0.99589	0.99983	0.99998	0.99562	0.99969	0.99765	0.9999	0.9999	0.99598	0.89607	0.99998	0.9989	0.99999	0.99989
0.94279	0.88569	0.996	0.99325	0.9945	0.99943	0.99993	0.99597	0.99997	0.99717	0.99999	0.99999	0.99454	0.99779	0.99998	0.9994	0.99984	0.91723
0.97637	0.91691	0.97899	0.98855	0.99731	0.99342	0.99728	0.97873	0.99888	0.99524	0.99779	0.9978	0.98472	0.9928	0.99809	0.99076	0.99683	0.95236
0.97565	0.91932	0.98395	0.99227	0.99846	0.99718	0.9991	0.98392	0.99974	0.9965	0.99954	0.99954	0.99711	0.99664	0.99934	0.99363	0.99923	0.99805
0.96828	0.91305	0.98821	0.98973	0.9974	0.99922	0.99975	0.98846	0.99933	0.99586	0.99973	0.99973	0.9905	0.99821	0.99975	0.99683	0.99981	0.99955
0.97344	0.9164	0.98515	0.99379	0.9986	0.99719	0.99916	0.98507	0.99977	0.99734	0.99958	0.99958	0.99713	0.99664	0.99938	0.99454	0.99926	0.99803
0.93398	0.86069	0.99805	0.99553	0.99785	0.99677	0.99936	0.99798	0.99987	0.99747	0.99854	0.99855	0.99758	0.99724	0.99936	0.99965	0.99882	0.99814
0.93467	0.86203	0.99715	0.99691	0.99828	0.99761	0.99909	0.99705	0.99964	0.99835	0.99691	0.99901	0.9979	0.99703	0.99909	0.99906	0.9991	0.99847
0.94176	0.88016	0.99922	0.9912	0.99426	0.9913	0.99935	0.99926	0.99939	0.9912	0.99511	0.99513	0.98993	0.99464	0.99945	1	0.99538	0.99337
0.93226	0.87544	0.99861	0.98747	0.99049	0.98693	0.99963	0.99888	0.99872	0.99172	0.99227	0.99231	0.98434	0.99586	0.99962	0.99987	0.99307	0.99196
0.92209	0.86745	0.99948	0.99256	0.99476	0.9955	0.99996	0.99965	0.99839	0.99256	0.99746	0.99747	0.99298	0.99857	0.99996	1	0.99736	0.99724
0.96338	0.90513	0.9739	0.96628	0.97641	0.9588	0.98454	0.9731	0.98577	0.97693	0.97398	0.97402	0.963	0.97607	0.98453	0.98802	0.97655	0.97009
0.96376	0.90482	0.97556	0.99497	0.99956	0.99913	0.99967	0.97942	0.99993	0.99668	0.99993	0.99993	0.98314	0.99807	0.99974	0.98622	0.99974	0.99941
0.97726	0.92239	0.98103	0.99366	0.99831	0.99605	0.99848	0.98092	0.9994	0.99737	0.99908	0.99908	0.99593	0.99631	0.99887	0.99092	0.99881	0.9974
0.96616	0.90689	0.99047	0.98912	0.99667	0.9978	0.99968	0.99043	0.99996	0.99533	0.99981	0.99981	0.99775	0.99634	0.99985	0.99802	0.99937	0.99831
0.96351	0.90351	0.99169	0.98614	0.99527	0.99745	0.99957	0.99162	0.99999	0.99397	0.99965	0.99965	0.99739	0.99577	0.99985	0.99867	0.99912	0.99798
0.96479	0.9072	0.98904	0.98771	0.99677	0.99876	0.9998	0.98914	0.99995	0.99394	0.99996	0.99996	0.99873	0.99716	0.9998	0.99772	0.99967	0.94216
0.95847	0.90145	0.98752	0.98787	0.99696	0.99938	0.99988	0.98835	0.99997	0.99312	0.99999	0.99999	0.9832	0.99801	0.99988	0.99657	0.99984	0.99957
0.95938	0.90168	0.98448	0.99089	0.99824	0.9993	0.99981	0.98576	0.99999	0.99483	0.99998	0.99998	0.98674	0.99795	0.99981	0.99502	0.9998	0.9995
0.96516	0.90824	0.98483	0.99142	0.99844	0.99913	0.99981	0.98532	0.99995	0.99566	0.99997	0.99997	0.99009	0.99772	0.99988	0.996	0.99979	0.99939
0.96425	0.90486	0.98963	0.99162	0.9974	0.99799	0.99958	0.98953	0.99999	0.99632	0.9998	0.9998	0.99794	0.99628	0.99958	0.9985	0.99936	0.99844
0.94446	0.87729	0.99627	0.99815	0.99785	0.99875	0.99988	0.99687	0.99928	0.99915	0.99996	0.99996	0.99737	0.99804	0.99988	0.99806	0.99984	0.9991
0.92986	0.85383	0.99842	0.99801	0.9986	0.99664	0.99998	0.99879	0.99983	0.99895	0.9991	0.9991	0.99582	0.99815	0.99998	0.99887	0.99896	0.99745
0.97366	0.91608	0.98477	0.99068	0.99812	0.99753	0.99939	0.98479	0.9999	0.9957	0.99973	0.99973	0.99748	0.99636	0.99961	0.99499	0.99927	0.99816
0.96428	0.90491	0.99099	0.98653	0.99574	0.99781	0.99963	0.99094	0.99999	0.99389	0.99976	0.99976	0.9866	0.99611	0.99986	0.99847	0.99928	0.99829
0.94477	0.88272	0.99735	0.99753	0.99657	0.99983	0.9995	0.99738	0.99847	0.99767	0.99939	0.99938	0.99721	0.99888	0.9995	0.9942	0.99985	0.99991
0.93635	0.86973	0.99813	0.99806	0.99757	0.99988	0.99925	0.99841	0.99818	0.99786	0.99917	0.99917	0.99826	0.99916	0.99925	0.98942	0.99978	0.99993
0.95277	0.89666	0.9942	0.99182	0.99557	0.99975	0.99992	0.9943	0.99941	0.9968	0.99981	0.9998	0.99974	0.9985	0.99992	0.99918	0.99996	0.99985
0.94149	0.87534	0.98969	0.99216	0.99795	0.99989	0.99997	0.99285	0.99998	0.9945	0.99999	0.99999	0.99989	0.99924	0.99997	0.99391	0.99997	0.99993
0.93263	0.86503	0.99055	0.99518	0.99902	0.99993	0.99998	0.99379	0.99998	0.99661	0.99998	0.99998	0.99993	0.97361	0.99998	0.99392	0.99999	0.99996
0.94558	0.88154	0.98677	0.99377	0.99878	0.99991	0.99996	0.99099	0.99983	0.99561	0.99986	0.99986	0.99991	0.99941	0.99996	0.9921	0.99996	0.99995
0.96804	0.86293	0.99162	0.99277	0.9972	0.99969	0.99991	0.99391	0.99998	0.99411	0.99998	0.99998	0.99972	0.92973	0.99997	0.98881	0.9999	0.98777
0.95695	0.89403	0.97762	0.99618	0.99974	0.99958	0.9998	0.98383	0.99991	0.99728	0.99991	0.99991	0.98391	0.97658	0.99982	0.98532	0.99988	0.99977
0.96822	0.91096	0.98557	0.99388	0.99544	0.99349	0.99666	0.98508	0.99828	0.99492	0.99509	0.9951	0.9904	0.99101	0.99805	0.99426	0.99418	0.98996
0.96669	0.9092	0.98629	0.98582	0.9946	0.99459	0.99599	0.98597	0.99765	0.9931	0.99391	0.99392	0.99205	0.98888	0.9979	0.99436	0.99284	0.98853
0.97182	0.91099	0.97196	0.99351	0.99881	0.99761	0.99884	0.97418	0.99959	0.99632	0.99946	0.99946	0.9976	0.99634	0.99883	0.98292	0.99893	0.99814
0.97325	0.91287	0.98173	0.98778	0.99662	0.99606	0.99843	0.98166	0.99954	0.99431	0.99893	0.99893	0.99598	0.99449	0.99893	0.9927	0.99818	0.99675
0.93415	0.85998	0.99797	0.99078	0.99384	0.98973	0.99971	0.99799	0.99969	0.99376	0.99449	0.99452	0.98456	0.99604	0.99997	0.99989	0.99499	0.99206
0.93307	0.86001	0.99749	0.9874	0.99149	0.98613	0.99923	0.99736	0.99895	0.9909	0.99183	0.99186	0.98027	0.99468	0.99984	0.99995	0.99263	0.9893
0.90739	0.82327	0.99962	0.99403	0.99703	0.99748	0.99996	0.99962	1	0.99673	0.99403	0.99845	0.9944	0.99946	0.99996	0.9997	0.9988	0.99852
0.90801	0.82583	0.99947	0.99537	0.99782	0.99838	0.99988	0.99947	0.99997	0.99761	0.99897	0.99898	0.99575	0.99936	0.99988	0.99948	0.99927	0.99904
0.91188	0.83162	0.99961	0.99379	0.99688	0.99742	0.99994	0.99959	0.99999	0.99674	0.99379	0.99843	0.99428	0.99908	0.99994	0.9999	0.99876	0.99846
0.95552	0.88941	0.96603	0.99776	0.999	0.99814	0.99879	0.97578	0.9993	0.99885	0.99943	0.99943	0.99815	0.9661	0.9989	0.9762	0.99901	0.99854
0.97266	0.91213	0.98298	0.98802	0.99649	0.99413	0.99777	0.98273	0.99921	0.99533	0.99811	0.99812	0.994	0.99308	0.99777	0.99392	0.99721	0.99502
0.97559	0.91439	0.97986	0.98418	0.99548	0.99248	0.99675	0.97958	0.99851	0.993	0.99707	0.99708	0.99232	0.99165	0.99781	0.99056	0.99601	0.99348
0.98275	0.92322	0.96757	0.99097	0.99834	0.99552	0.99776	0.96866	0.99898	0.99528	0.99863	0.99863	0.99549	0.99488	0.9983	0.97773	0.99789	0.9965
0.97021	0.91281	0.98687	0.99112	0.99628	0.99728	0.9986	0.98683	0.99962	0.99577	0.99819	0.99819	0.99606	0.99452	0.99859	0.99419	0.99748	0.9946
0.96229	0.90537	0.98861	0.99159	0.99782	0.99923	0.99988	0.98874	0.99989	0.9966	0.99998	0.99998	0.99922	0.99775	0.99988	0.99827	0.99985	0.94558
0.94504	0.88939	0.99081	0.99092	0.99681	0.99972	0.99994	0.99168	0.99998	0.9965	1	1	0.99344	0.99858	0.99997	0.99917	0.99993	0.99981
0.96512	0.90588	0.98158	0.99239	0.99847	0.99829	0.9993	0.98214	0.99988	0.99593	0.99974	0.99974	0.98942	0.99663	0.99947	0.99397	0.99931	0.95878
0.94614	0.88012	0.99651	0.99745	0.99641	0.99675	0.99986	0.99643	0.99995	0.99848	0.99947	0.99947	0.99475	0.99626	0.99986	0.99818	0.99901	0.99739
0.94872	0.88326	0.996	0.99772	0.99795	0.99775	0.99988	0.99593	0.99987	0.99897	0.99982	0.99982	0.99646	0.99678	0.99994	0.99801	0.99944	0.99825
0.94113	0.87333	0.99744	0.99853	0.99767	0.9978	0.99994	0.9974	0.99975	0.999	0.99981	0.99982	0.99636	0.99723	0.99994	0.997	0.99948	0.9983
0.97374	0.91449	0.98302	0.98843	0.9977	0.99454	0.998	0.98353	0.99922	0.99559	0.99819	0.99819	0.99418	0.99312	0.99872	0.99348	0.99692	0.99451
0.96828	0.90605	0.98697	0.98138	0.99309	0.99302	0.99758	0.98673	0.99907	0.99262	0.99738	0.99738	0.99283	0.99188	0.99863	0.99574	0.9964	0.99394
0.9697	0.9105	0.98529	0.9889	0.99724	0.99745	0.99922	0.98527	0.99991	0.99463	0.99958	0.99958	0.9974	0.99579	0.99922	0.99568	0.99902	0.99798
0.97401	0.91364	0.98203	0.98577	0.99609	0.99627	0.99858	0.9821	0.99962	0.99259	0.99902	0.99902	0.9962	0.99473	0.9991	0.99178	0.99829	0.99694
0.93317	0.86506	0.99895	0.99803	0.99652	0.99982	0.99961	0.99917	0.99896	0.99817	0.99975	0.99975	0.99717	0.99871	0.99961	0.9899	0.99997	0.99989
0.91836	0.84147	0.9992	0.99921	0.99872	0.99967	0.99958	0.99941	0.99899	0.99934	0.99993	0.99993	0.99878	0.99919	0.99958	0.98822	0.99999	0.99978
0.92813	0.85577	0.99889	0.99921	0.99856	0.99863	0.99996	0.99906	0.99957	0.99933	0.99995	0.99995	0.99766	0.99809	0.99996	0.99935	0.99974	0.99898
0.93126	0.85951	0.99896	0.99911	0.9986	0.9992	0.99992	0.99898	0.99942	0.99946	1	1	0.99837	0.99826	0.99992	0.99935	0.99991	0.99943
0.94472	0.89119	0.99356	0.99169	0.99561	0.99993	0.99995	0.99395	0.99966	0.99645	0.99982	0.99982	0.994	0.89987	0.99995	0.99963	0.99998	0.99996
0.95107	0.88911	0.98229	0.99457	0.99933	0.99974	0.99992	0.98716	0.99996	0.99631	0.99997	0.99997	0.99975	0.97031	0.99994	0.98997	0.99994	0.99984
0.97416	0.91658	0.97851	0.99198	0.99886	0.9982	0.9994	0.97923	0.99989	0.99537	0.99981	0.99981	0.98261	0.99695	0.99958	0.99031	0.99942	0.99869
0.96881	0.90855	0.96784	0.99678	0.99954	0.99853	0.99926	0.97343	0.9997	0.99801	0.99973	0.99973	0.99854	0.97025	0.99938	0.97795	0.99948	0.99903
0.98604	0.92993	0.96914	0.9894	0.99807	0.99435	0.99735	0.96948	0.99879	0.99485	0.99826	0.99826	0.99427	0.99442	0.99801	0.98011	0.99756	0.99572
0.97716	0.92108	0.98212	0.99248	0.99851	0.99684	0.99894	0.98209	0.99971	0.99667	0.99946	0.99946	0.99678	0.99635	0.9992	0.99265	0.99908	0.99777
0.94235	0.87415	0.99665	0.99833	0.99773	0.99925	0.99972	0.99738	0.99884	0.99908	0.9999	0.9999	0.99792	0.99848	0.99972	0.99376	0.99991	0.9995
0.94744	0.88091	0.995	0.9982	0.99777	0.99927	0.99957	0.99616	0.99858	0.99893	0.99973	0.99973	0.99925	0.99859	0.99958	0.99383	0.99986	0.99955
0.94465	0.89115	0.99152	0.99396	0.99717	0.99995	0.99995	0.99236	0.99969	0.99717	0.9998	0.9998	0.99995	0.9002	0.99995	0.9994	0.99997	0.99997
0.95963	0.90145	0.98125	0.99343	0.9991	0.99922	0.99973	0.98319	0.99999	0.99628	0.99997	0.99997	0.98976	0.99788	0.9998	0.99323	0.99975	0.99943
0.94167	0.87921	0.98444	0.99664	0.99956	0.99981	0.99978	0.99013	0.99956	0.99758	0.99952	0.99952	0.99982	0.97779	0.99978	0.9904	0.99979	0.99984
0.9558	0.89213	0.97605	0.99707	0.9998	0.99952	0.99977	0.98315	0.99992	0.99793	0.99993	0.99993	0.98546	0.9634	0.99979	0.98395	0.99986	0.99973
0.96767	0.90904	0.98908	0.99386	0.99828	0.9982	0.99967	0.98904	0.99987	0.99744	0.99988	0.99988	0.99817	0.99697	0.99967	0.99746	0.99959	0.9987
0.96053	0.9009	0.99231	0.99155	0.99668	0.99841	0.9998	0.99225	0.99995	0.99639	0.99992	0.99992	0.99837	0.9967	0.9998	0.99915	0.99957	0.99879
0.95643	0.90099	0.99041	0.99364	0.99767	0.99974	0.99994	0.99064	0.99962	0.99753	0.99983	0.99983	0.99529	0.99856	0.99994	0.99902	0.99996	0.99984
0.94222	0.87721	0.99781	0.99851	0.99777	0.99956	0.99993	0.99779	0.99939	0.99892	0.99991	0.99991	0.99829	0.99816	0.99993	0.99471	0.99997	0.9997
0.92319	0.8489	0.99957	0.99928	0.99863	0.99909	0.99995	0.99964	0.99966	0.99947	0.99999	0.99999	0.99825	0.99823	0.99995	0.99972	0.99984	0.99934
0.9317	0.85974	0.99804	0.99939	0.99838	0.99898	0.99997	0.99843	0.99967	0.99948	0.99975	0.99975	0.99862	0.998	0.99997	0.99456	0.99949	0.99837
0.95837	0.90061	0.98854	0.99359	0.99815	0.99907	0.99978	0.98858	0.99999	0.99739	0.99997	0.99997	0.99485	0.99742	0.99986	0.99883	0.99973	0.93711
0.96254	0.90823	0.98562	0.99392	0.99872	0.99965	0.99984	0.98631	0.99946	0.99748	0.99962	0.99962	0.99484	0.99878	0.99984	0.99703	0.99986	0.99981
0.94872	0.89383	0.98832	0.99183	0.99786	0.9999	0.99997	0.98999	0.99981	0.99642	0.99988	0.99988	0.9999	0.99905	0.99997	0.99782	0.99998	0.99994
0.94012	0.87724	0.98516	0.99637	0.99965	0.9999	0.99995	0.9904	0.9999	0.99754	0.99989	0.99989	0.9999	0.9994	0.99995	0.99115	0.99997	0.99995
0.99475	0.96048	0.93961	0.99682	0.9991	0.99785	0.99935	0.96171	0.9998	0.99892	0.99985	0.99985	0.99781	0.99929	0.99954	0.97194	0.99982	0.99933
0.96307	0.90259	0.99192	0.99401	0.99753	0.99795	0.99974	0.99185	0.99984	0.99754	0.99988	0.99988	0.99791	0.99682	0.99983	0.99789	0.99953	0.99847
0.96162	0.90014	0.98003	0.99253	0.99884	0.99909	0.99966	0.98302	0.99997	0.99495	0.99993	0.99993	0.9789	0.99784	0.99975	0.98854	0.99967	0.99934
0.95248	0.88246	0.9774	0.99729	0.99966	0.99937	0.9997	0.98457	0.99993	0.99808	0.99994	0.99994	0.99938	0.99855	0.99975	0.98365	0.99976	0.99957
0.94377	0.86717	0.98587	0.99716	0.99967	0.99981	0.99991	0.99092	0.99993	0.99782	0.99993	0.99993	0.98659	0.87946	0.99992	0.98957	0.99995	0.99991
0.94268	0.86853	0.98331	0.99711	0.99952	0.99946	0.9997	0.98892	0.99992	0.99791	0.99992	0.99992	0.99947	0.9807	0.99974	0.98789	0.99975	0.99961
0.96019	0.90001	0.98054	0.99263	0.9989	0.99919	0.99971	0.98339	0.99998	0.99514	0.99995	0.99995	0.98115	0.99795	0.99979	0.99018	0.99973	0.99942
0.94783	0.88852	0.98673	0.99121	0.99798	0.99964	0.99988	0.98934	1	0.99488	0.99999	0.99999	0.99963	0.99858	0.99991	0.99518	0.99988	0.99975
0.94347	0.8878	0.99015	0.99119	0.9972	0.9998	0.99996	0.99155	0.99998	0.9964	1	1	0.99317	0.9988	0.99996	0.99856	0.99995	0.99987
0.91879	0.84539	0.99444	0.99675	0.99924	0.99998	0.99999	0.99634	0.99995	0.9976	0.99994	0.99994	0.99999	0.94193	0.99999	0.99605	0.99999	0.99999
0.95961	0.90658	0.97777	0.99524	0.99929	0.9998	0.99955	0.98374	0.9991	0.99658	0.99907	0.99907	0.98543	0.97371	0.99955	0.98797	0.99963	0.9998
0.93485	0.87014	0.99075	0.9944	0.99867	0.99993	0.99987	0.99408	0.99966	0.99602	0.99968	0.99968	0.99993	0.97252	0.99987	0.99438	0.9999	0.99993
0.93895	0.87806	0.99314	0.98836	0.99584	0.99989	0.99977	0.99528	0.99948	0.99236	0.99956	0.99956	0.99989	0.99976	0.99977	0.99705	0.99985	0.9999
0.94109	0.87008	0.98297	0.99806	0.9999	0.99976	0.9999	0.98917	0.99997	0.99859	0.99997	0.99997	0.99978	0.9552	0.99991	0.98832	0.99994	0.99987
0.91081	0.82227	0.99555	0.99856	0.99965	0.99995	0.99999	0.99705	0.99995	0.99887	0.99995	0.99995	0.99453	0.8362	0.99999	0.9967	0.99999	0.99999
0.92208	0.84444	0.9917	0.99825	0.99981	0.99991	0.99997	0.99457	1	0.9987	0.99999	0.99999	0.99992	0.99954	0.99997	0.99407	0.99998	0.99995
0.96508	0.90424	0.98688	0.9914	0.9968	0.99663	0.99872	0.98661	0.99971	0.99652	0.99916	0.99916	0.99653	0.99471	0.99872	0.99761	0.99849	0.99723
0.94419	0.87714	0.9972	0.99802	0.99788	0.99836	0.99995	0.99716	0.99964	0.99897	0.99995	0.99995	0.99704	0.99743	0.99995	0.9963	0.99969	0.99876
0.95837	0.89994	0.99224	0.9939	0.99734	0.99916	0.99992	0.99221	0.99983	0.99774	0.99999	0.99999	0.99914	0.99756	0.99992	0.99921	0.99984	0.93408
0.94874	0.89407	0.98952	0.98963	0.997	0.9999	0.99997	0.9909	0.99977	0.99532	0.99987	0.99987	0.9999	0.99905	0.99997	0.99808	0.99998	0.99995
0.97492	0.91697	0.98218	0.99243	0.99841	0.9968	0.999	0.98211	0.99981	0.99688	0.99948	0.99949	0.99674	0.99568	0.99932	0.9939	0.99889	0.99752
0.97568	0.91907	0.9809	0.99246	0.99891	0.99797	0.99937	0.9811	0.99986	0.99614	0.99978	0.99978	0.98831	0.99684	0.99937	0.99289	0.99942	0.95695
0.96638	0.90859	0.98743	0.98854	0.9973	0.9986	0.99971	0.98756	0.99998	0.99413	0.99992	0.99992	0.99857	0.997	0.99985	0.99699	0.99959	0.99896
0.94511	0.88944	0.99067	0.98842	0.9964	0.99995	0.99992	0.99257	0.99965	0.99398	0.99975	0.99975	0.99995	0.99941	0.99992	0.99773	0.99995	0.99997
0.95925	0.89725	0.99335	0.99403	0.99696	0.99745	0.99976	0.99326	0.99988	0.99769	0.99978	0.99978	0.99741	0.99653	0.99976	0.99801	0.99935	0.99804
0.95735	0.89892	0.99347	0.99145	0.99616	0.99918	0.99994	0.99347	0.99976	0.99688	0.99999	0.99999	0.99916	0.99759	0.99996	0.99919	0.99985	0.93135
0.947	0.88119	0.99715	0.99718	0.99687	0.99871	0.99995	0.99712	0.99946	0.99859	0.99998	0.99998	0.99689	0.99758	0.99995	0.99645	0.99979	0.99905
0.94637	0.87172	0.98277	0.99754	0.99981	0.99971	0.99988	0.98881	0.99997	0.99816	0.99997	0.99997	0.98675	0.95505	0.9999	0.9874	0.99992	0.99984
0.92279	0.83393	0.99322	0.99828	0.99966	0.99992	0.99998	0.99557	0.99999	0.99867	0.99998	0.99998	0.99995	0.84767	0.99998	0.99494	0.99999	0.99997
0.93721	0.8611	0.98963	0.99585	0.99913	0.99986	0.99995	0.99317	1	0.99683	1	1	0.99986	0.97888	0.99996	0.99229	0.99996	0.99991
0.96379	0.89897	0.98565	0.9922	0.99577	0.98785	0.99765	0.98691	0.99886	0.99423	0.99465	0.99466	0.98896	0.99437	0.99764	0.99797	0.99452	0.99009
0.95424	0.89672	0.9822	0.99382	0.99919	0.99963	0.9999	0.98532	0.99998	0.99652	0.99999	0.99999	0.99963	0.99856	0.9999	0.99321	0.99991	0.99975
0.95762	0.89978	0.98301	0.99218	0.99872	0.99944	0.99984	0.98514	0.99999	0.9954	0.99999	0.99999	0.98665	0.99822	0.99989	0.99364	0.99985	0.99961
0.95983	0.89885	0.99323	0.99621	0.99783	0.99881	0.99983	0.99319	0.99954	0.99863	0.99994	0.99994	0.99878	0.99762	0.99983	0.99773	0.99981	0.99918
0.95775	0.89615	0.99413	0.9964	0.99757	0.99899	0.99986	0.9941	0.99937	0.99866	0.99992	0.99992	0.99639	0.99783	0.99986	0.99769	0.99985	0.99932
0.93258	0.85457	0.99855	0.99196	0.99606	0.99537	0.99967	0.99847	0.99992	0.99523	0.9974	0.99742	0.99065	0.99776	0.99967	0.99997	0.9979	0.99714
0.92916	0.84632	0.99827	0.99195	0.99608	0.99485	0.99983	0.99822	0.99995	0.99505	0.99693	0.99195	0.99001	0.9985	0.99983	0.99425	0.99765	0.99664
0.93215	0.85049	0.99795	0.9924	0.99638	0.99501	0.99976	0.99788	0.99995	0.9953	0.99709	0.99711	0.99033	0.9983	0.99976	0.99988	0.99776	0.99668
0.96701	0.90502	0.98426	0.99298	0.99554	0.99043	0.99823	0.98629	0.99928	0.9959	0.99653	0.99654	0.99086	0.99506	0.99822	0.9959	0.99639	0.99269
0.98377	0.93576	0.96446	0.98863	0.99529	0.99228	0.99526	0.97039	0.9975	0.99554	0.9953	0.9953	0.98981	0.99266	0.99659	0.97945	0.99544	0.99216
0.96788	0.92873	0.95387	0.95582	0.96978	0.94237	0.97351	0.95228	0.97493	0.96577	0.96244	0.96248	0.94709	0.96817	0.98274	0.96778	0.9663	0.95886
0.94715	0.88592	0.9766	0.94176	0.95854	0.93777	0.98604	0.9769	0.97843	0.95696	0.95558	0.95573	0.94861	0.96918	0.99285	0.98417	0.95986	0.95246
0.96005	0.91413	0.96458	0.95063	0.96526	0.94154	0.97811	0.96379	0.97741	0.96531	0.96157	0.96163	0.94801	0.96784	0.9875	0.97673	0.96587	0.95742
0.95256	0.90678	0.95993	0.93942	0.95666	0.92938	0.97403	0.95942	0.96901	0.95437	0.95043	0.95049	0.9345	0.95858	0.98571	0.97119	0.95456	0.946
0.94823	0.88639	0.98519	0.99359	0.99888	0.99987	0.99995	0.98948	0.99988	0.99567	0.99991	0.99991	0.99988	0.95483	0.99995	0.99192	0.99997	0.99993
0.9606	0.89916	0.99253	0.99602	0.99803	0.99793	0.99976	0.99245	0.99985	0.99834	0.99988	0.99988	0.99789	0.99685	0.99984	0.99798	0.99953	0.93033
0.96435	0.90892	0.98796	0.99167	0.99795	0.99948	0.99985	0.98825	0.99956	0.99684	0.99981	0.99981	0.99301	0.99834	0.99985	0.99763	0.99989	0.9997
0.95063	0.89139	0.98512	0.99242	0.99857	0.99984	0.99995	0.98865	0.99989	0.99523	0.99993	0.99993	0.99984	0.99906	0.99995	0.99252	0.99997	0.99991
0.95607	0.90272	0.98937	0.99588	0.99813	0.99978	0.99964	0.98986	0.99897	0.99739	0.99921	0.99921	0.99978	0.99916	0.99964	0.99847	0.99974	0.99985
0.94239	0.88708	0.98148	0.99704	0.99935	0.99964	0.99944	0.98829	0.99919	0.99778	0.999	0.999	0.99963	0.9995	0.99944	0.98989	0.99948	0.9996
0.96654	0.91144	0.98202	0.99287	0.99901	0.99945	0.99978	0.98323	0.99972	0.99637	0.99982	0.99982	0.98994	0.99849	0.99982	0.99399	0.99986	0.99969
0.96453	0.90451	0.98001	0.99151	0.99844	0.99855	0.99941	0.98168	0.99991	0.99468	0.9998	0.9998	0.99854	0.99708	0.99956	0.99037	0.99941	0.99889
0.9613	0.90324	0.98453	0.99055	0.99812	0.99905	0.99972	0.98542	0.99999	0.99467	0.99995	0.99995	0.98684	0.99757	0.99982	0.99522	0.99969	0.9993
0.96019	0.90459	0.98422	0.9921	0.99863	0.99967	0.99989	0.9857	0.9998	0.99605	0.99988	0.99988	0.98986	0.99865	0.99989	0.99513	0.99993	0.99981
0.95072	0.8962	0.99163	0.98478	0.99494	0.99983	0.99997	0.99236	0.99975	0.99257	0.99991	0.99991	0.98335	0.9988	0.99997	0.99863	0.99998	0.9999
0.94609	0.89276	0.99284	0.98554	0.99464	0.99993	0.99995	0.99356	0.99965	0.99388	0.99981	0.99981	0.98786	0.90193	0.99995	0.99926	0.99998	0.99996
0.95361	0.87996	0.97573	0.99777	0.99963	0.99915	0.99955	0.98357	0.99985	0.9985	0.99987	0.99987	0.98583	0.96021	0.99962	0.98173	0.99964	0.99941
0.93002	0.84589	0.98781	0.99888	0.99978	0.99966	0.99982	0.99209	0.99995	0.9992	0.99996	0.99996	0.9997	0.9433	0.99984	0.99123	0.99986	0.99978
0.95284	0.88148	0.97898	0.99559	0.99898	0.99893	0.99938	0.98487	0.99978	0.99692	0.99975	0.99975	0.99894	0.97692	0.99947	0.98446	0.99946	0.99918
0.94891	0.8742	0.98481	0.99497	0.999	0.99951	0.99976	0.98946	0.99997	0.9962	0.99995	0.99995	0.98125	0.99866	0.99981	0.98828	0.99979	0.99965
0.96924	0.9153	0.97722	0.99482	0.99944	0.99923	0.99962	0.97937	0.99953	0.99716	0.99958	0.99958	0.99009	0.99864	0.99965	0.99044	0.99972	0.99959
0.9558	0.89789	0.9848	0.99091	0.99819	0.99963	0.99992	0.98704	0.99996	0.99445	0.99999	0.99999	0.98312	0.99853	0.99992	0.99408	0.99992	0.99975
0.93623	0.86846	0.99114	0.9933	0.99823	0.99994	0.99999	0.99408	0.99997	0.99523	0.99998	0.99998	0.99995	0.97023	0.99999	0.9944	0.99999	0.99997
0.95063	0.89139	0.98512	0.99242	0.99857	0.99984	0.99995	0.98865	0.99989	0.99523	0.99993	0.99993	0.99984	0.99906	0.99995	0.99252	0.99997	0.99991
0.95881	0.90185	0.98919	0.9863	0.99618	0.99925	0.99987	0.98963	0.99996	0.9926	0.99999	0.99999	0.99924	0.99776	0.99994	0.99767	0.9998	0.94021
0.92707	0.85167	0.99203	0.99681	0.99937	0.99994	0.99998	0.99481	0.99998	0.9976	0.99998	0.99998	0.99995	0.98054	0.99998	0.99427	0.99999	0.99997
0.89805	0.8188	0.9976	0.99807	0.99939	0.99997	0.99995	0.99836	0.99807	0.9985	0.99989	0.99989	0.99996	0.9853	0.99995	0.99822	0.99996	0.99997
0.91622	0.84396	0.99449	0.99723	0.99944	0.99998	0.99999	0.99635	0.99574	0.99798	0.99995	0.99995	0.99999	0.98051	0.99999	0.99612	0.99999	0.99999
0.94587	0.88852	0.98799	0.991	0.99773	0.99971	0.99992	0.99012	1	0.99544	1	1	0.99971	0.99868	0.99994	0.99675	0.99992	0.9998
0.9403	0.88122	0.99725	0.99779	0.99668	0.99978	0.99998	0.99723	0.99967	0.99835	0.99992	0.99991	0.99729	0.9984	0.99998	0.99685	0.99998	0.99986
0.95629	0.88897	0.9816	0.99434	0.9992	0.99958	0.99986	0.9865	0.99998	0.99582	0.99998	0.99998	0.99959	0.97399	0.9999	0.98713	0.99988	0.99973
0.96419	0.9016	0.9827	0.98991	0.99796	0.99908	0.9997	0.98488	0.99999	0.99292	0.99994	0.99994	0.99907	0.99779	0.99981	0.99014	0.99968	0.99933
0.95711	0.89977	0.98464	0.99116	0.9983	0.99951	0.99988	0.98635	0.99998	0.99499	0.99999	0.99999	0.98661	0.99829	0.99988	0.99471	0.99988	0.99966
0.94784	0.8934	0.98949	0.99137	0.99742	0.99992	0.99997	0.99084	0.99977	0.99635	0.99985	0.99985	0.99992	0.99909	0.99997	0.99833	0.99998	0.99995
0.93331	0.87062	0.99158	0.99314	0.99826	0.99997	0.99999	0.99437	0.99995	0.99569	0.99996	0.99996	0.98614	0.99951	0.99999	0.99573	1	0.99998
0.9426	0.86569	0.98658	0.99623	0.99933	0.99967	0.99985	0.99106	0.99999	0.99714	0.99998	0.99998	0.99968	0.95095	0.99988	0.98983	0.99987	0.99977
0.95072	0.8962	0.99163	0.98478	0.99494	0.99983	0.99997	0.99236	0.99975	0.99257	0.99991	0.99991	0.98335	0.9988	0.99997	0.99863	0.99998	0.9999
0.95712	0.90031	0.99251	0.99116	0.99644	0.99951	0.99994	0.99259	0.99966	0.99688	0.99993	0.99993	0.99363	0.99809	0.99994	0.99918	0.99993	0.99968
0.95333	0.89536	0.99498	0.99205	0.99536	0.99954	0.99996	0.995	0.99952	0.99704	0.99992	0.99992	0.99953	0.99808	0.99996	0.99889	0.99995	0.92928
0.96307	0.90259	0.99192	0.99401	0.99753	0.99795	0.99974	0.99185	0.99984	0.99754	0.99988	0.99988	0.99791	0.99682	0.99983	0.99789	0.99953	0.99847
0.95941	0.89632	0.9742	0.99681	0.99972	0.99933	0.9997	0.98092	0.9999	0.99778	0.99991	0.99992	0.9843	0.96488	0.99975	0.98265	0.9998	0.99958
0.96555	0.90006	0.97798	0.99267	0.99863	0.9987	0.99943	0.98147	0.99989	0.99495	0.9998	0.9998	0.9987	0.99745	0.99958	0.98494	0.99945	0.99902
0.93896	0.86789	0.97829	0.99931	0.99966	0.99945	0.99971	0.98643	0.99988	0.99956	0.99994	0.99994	0.9995	0.95664	0.99974	0.98553	0.9998	0.99966
0.96022	0.9015	0.97599	0.99609	0.99964	0.99945	0.99969	0.98197	0.99968	0.99729	0.99968	0.99968	0.99946	0.96479	0.99973	0.98518	0.99978	0.99971
0.92852	0.87624	0.99804	0.99728	0.9949	0.99997	0.99977	0.99813	0.99951	0.99701	0.99964	0.99964	0.99676	0.99943	0.99977	0.99966	0.99991	0.99996
0.91343	0.84451	0.99468	0.99751	0.99958	0.99998	0.99999	0.99644	0.99995	0.99825	0.99994	0.99994	0.99999	0.99977	0.99999	0.99633	0.99999	0.99999
0.94141	0.8884	0.9925	0.98832	0.99562	0.99996	0.99988	0.99378	0.99958	0.9948	0.9997	0.9997	0.99098	0.89787	0.99988	0.99908	0.99994	0.99997
0.92455	0.85018	0.99206	0.99727	0.99955	0.99994	0.99998	0.99482	0.99999	0.99798	0.99998	0.99998	0.99995	0.99957	0.99998	0.99437	0.99999	0.99997
0.95677	0.89235	0.9797	0.99462	0.99936	0.99944	0.99979	0.98465	0.99998	0.99618	0.99998	0.99998	0.99945	0.97245	0.99985	0.98699	0.99982	0.99962
0.95218	0.88947	0.98735	0.98906	0.9971	0.99954	0.99985	0.9897	1	0.9926	0.99998	0.99998	0.99954	0.99843	0.9999	0.99407	0.99984	0.99967
0.95952	0.89549	0.97207	0.9963	0.99936	0.99861	0.99924	0.97832	0.99972	0.9977	0.99972	0.99972	0.99861	0.96452	0.99935	0.98149	0.99936	0.99894
0.9651	0.89881	0.97582	0.99379	0.99876	0.99856	0.9993	0.98008	0.99981	0.99584	0.99973	0.99973	0.99856	0.96337	0.99945	0.98284	0.99935	0.9989
0.96357	0.895	0.97611	0.99239	0.9977	0.99774	0.99866	0.97989	0.99941	0.99514	0.99925	0.99925	0.99773	0.9963	0.99888	0.98284	0.99875	0.99816
0.98008	0.91539	0.96871	0.98476	0.9953	0.9914	0.99491	0.9687	0.99689	0.99182	0.99584	0.99584	0.99127	0.99037	0.99602	0.97856	0.99463	0.9924
0.96302	0.90968	0.98472	0.97586	0.98669	0.98399	0.99379	0.98427	0.99496	0.98694	0.98863	0.98864	0.98004	0.98473	0.99708	0.99178	0.98752	0.98154
0.93501	0.85258	0.99638	0.97984	0.98724	0.98273	0.99864	0.99601	0.99739	0.98497	0.98906	0.98911	0.98886	0.99485	0.99954	0.99844	0.99042	0.9879
0.9545	0.88123	0.99095	0.98527	0.99142	0.98231	0.99727	0.99089	0.99751	0.98804	0.98984	0.98987	0.98617	0.99338	0.99726	0.99854	0.99043	0.98589
0.98133	0.92563	0.9676	0.99488	0.99911	0.99703	0.99852	0.96888	0.99932	0.99741	0.9993	0.9993	0.997	0.99651	0.99876	0.98086	0.99892	0.99796
0.9438	0.88859	0.99187	0.99089	0.99635	0.99975	0.99996	0.99254	0.99997	0.99658	1	1	0.99369	0.89794	0.99998	0.99955	0.99994	0.99983
0.95363	0.89689	0.99215	0.99108	0.99645	0.99945	0.99995	0.99223	0.9999	0.99674	0.99999	0.99999	0.99372	0.99793	0.99995	0.99955	0.99989	0.99962
0.9891	0.94065	0.9658	0.99533	0.99968	0.9977	0.99918	0.96739	0.99978	0.99763	0.99974	0.99974	0.99768	0.99789	0.99941	0.97861	0.99949	0.99868
0.96907	0.91078	0.98038	0.99159	0.99872	0.9986	0.99955	0.98134	0.99996	0.99498	0.99988	0.99988	0.98306	0.9972	0.99969	0.99173	0.99954	0.99897
0.94844	0.8909	0.99553	0.99257	0.99497	0.99952	0.99998	0.99552	0.99979	0.99707	0.99998	0.99998	0.99425	0.99796	0.99998	0.99964	0.99992	0.99967
0.95816	0.90062	0.99136	0.98632	0.99559	0.99899	0.99984	0.99144	0.99997	0.99368	0.99997	0.99997	0.98827	0.99729	0.99984	0.99901	0.99971	0.93502
0.96118	0.90346	0.98744	0.98661	0.99659	0.99906	0.99978	0.98806	0.99999	0.99194	0.99996	0.99996	0.99904	0.99754	0.99989	0.99616	0.99971	0.94387
0.94145	0.87419	0.99828	0.99747	0.99661	0.99874	0.99998	0.99826	0.99958	0.99856	0.99998	0.99998	0.997	0.99745	0.99998	0.99555	0.99976	0.99906
0.94116	0.88014	0.99798	0.99657	0.99522	0.99956	0.99999	0.99797	0.99969	0.99798	0.99997	0.99997	0.99589	0.99798	0.99999	0.99659	0.99994	0.9997
0.94461	0.88626	0.99592	0.99741	0.99696	0.99968	0.99999	0.99588	0.99976	0.99843	0.99995	0.99995	0.99711	0.99822	0.99999	0.99833	0.99996	0.99979
0.95153	0.88826	0.99571	0.99808	0.99808	0.99922	0.99993	0.99567	0.99947	0.99906	0.99994	0.99994	0.99802	0.99788	0.99993	0.99692	0.99991	0.99947
0.94752	0.88103	0.99452	0.99882	0.99783	0.99886	0.99985	0.99571	0.99967	0.99909	0.99978	0.99979	0.9981	0.99772	0.99985	0.99638	0.99947	0.99839
0.98066	0.93338	0.95269	0.999	0.99743	0.99815	0.99908	0.96004	0.99903	0.99951	0.99958	0.99958	0.99824	0.98289	0.9992	0.96728	0.99932	0.99924
0.9458	0.8669	0.98234	0.99726	0.99936	0.99929	0.99958	0.9882	0.99986	0.99804	0.99985	0.99985	0.98582	0.95307	0.99964	0.98653	0.99965	0.99948
0.92213	0.82948	0.99008	0.99883	0.99934	0.99929	0.99947	0.99315	0.99968	0.99923	0.99971	0.99971	0.99336	0.84368	0.9995	0.99246	0.99956	0.99946
0.96227	0.88744	0.97205	0.99442	0.99807	0.99744	0.99829	0.97833	0.99905	0.99668	0.99896	0.99896	0.97815	0.9625	0.99852	0.97668	0.99845	0.99789
0.97248	0.91014	0.98108	0.98448	0.99499	0.99545	0.99789	0.98115	0.99918	0.99178	0.99842	0.99842	0.99536	0.99371	0.99853	0.99044	0.99759	0.99616
0.95291	0.87505	0.97503	0.99688	0.99897	0.99838	0.99891	0.98268	0.99941	0.99812	0.99941	0.99942	0.9843	0.95823	0.99903	0.98042	0.99905	0.99871
0.96534	0.89676	0.97259	0.99484	0.99881	0.99821	0.99902	0.97802	0.99961	0.99676	0.99954	0.99954	0.99821	0.9768	0.99919	0.97899	0.99912	0.99861
0.95779	0.89506	0.9939	0.98777	0.99398	0.9959	0.99947	0.99414	0.99989	0.9958	0.99894	0.99894	0.9922	0.99472	0.99946	0.99806	0.99807	0.996
0.96757	0.90818	0.98644	0.99197	0.99777	0.99752	0.99926	0.98631	0.99993	0.99651	0.99963	0.99963	0.99746	0.99582	0.99926	0.99717	0.99909	0.99804
0.9431	0.87097	0.98811	0.9943	0.99873	0.99979	0.99992	0.99192	1	0.99571	1	1	0.99979	0.9991	0.99995	0.99142	0.99993	0.99986
0.98731	0.94571	0.94127	0.9979	0.99425	0.99537	0.99708	0.94672	0.99695	0.99858	0.9983	0.9983	0.99542	0.987	0.99734	0.95608	0.99827	0.99767
0.91217	0.8272	0.99364	0.99917	0.99993	0.99991	0.99998	0.99576	0.99999	0.99937	0.99999	0.99999	0.99995	0.99968	0.99998	0.9954	0.99999	0.99997
0.90203	0.80561	0.99523	0.99945	0.99974	0.99972	0.9998	0.99655	0.99989	0.99961	0.99991	0.99991	0.99975	0.99334	0.99982	0.99625	0.99985	0.99981
0.91257	0.82055	0.99532	0.9987	0.99969	0.99994	0.99998	0.99691	0.99996	0.99898	0.99996	0.99996	0.99998	0.83479	0.99998	0.99652	0.99999	0.99999
0.96215	0.89079	0.95884	0.99867	0.99789	0.99775	0.99856	0.97185	0.999	0.99937	0.99924	0.99924	0.99792	0.96847	0.99869	0.96867	0.99898	0.99857
0.98457	0.9366	0.96471	0.98844	0.99557	0.99414	0.99559	0.97198	0.99776	0.99449	0.99585	0.99586	0.99242	0.99301	0.99689	0.9792	0.99588	0.99288
0.95808	0.90302	0.98575	0.99052	0.99798	0.99976	0.99991	0.98737	0.99966	0.99498	0.99979	0.99979	0.98655	0.99889	0.99991	0.99562	0.99994	0.99987
0.96036	0.89715	0.9802	0.99306	0.99897	0.99927	0.99973	0.98393	0.99998	0.99514	0.99996	0.99996	0.99927	0.95958	0.99981	0.98802	0.99975	0.99948
0.9338	0.86347	0.99878	0.9987	0.99761	0.99823	0.99999	0.99877	0.99967	0.99889	0.99988	0.99988	0.99684	0.99751	0.99999	0.99572	0.9996	0.99865
0.93065	0.85957	0.99885	0.99881	0.99746	0.99801	0.99999	0.99894	0.99981	0.99903	0.99971	0.99971	0.9967	0.99752	0.99999	0.99515	0.99933	0.99818
0.98374	0.93061	0.95642	0.99566	0.99793	0.99571	0.99722	0.95996	0.99828	0.99812	0.99835	0.99835	0.99569	0.97899	0.99755	0.96853	0.99826	0.99743
0.96039	0.89435	0.98167	0.99086	0.99785	0.99865	0.99933	0.98452	0.99983	0.99365	0.99971	0.99971	0.99864	0.99725	0.99947	0.98856	0.99935	0.99895
0.95625	0.89269	0.98621	0.98861	0.99704	0.99925	0.99971	0.98834	0.99998	0.99208	0.99993	0.99993	0.99925	0.99798	0.99971	0.993	0.9997	0.99945
0.95461	0.88744	0.98385	0.99199	0.99825	0.99929	0.99968	0.98748	0.99996	0.9942	0.99991	0.99991	0.99928	0.89864	0.99975	0.98957	0.9997	0.99947
0.94015	0.85924	0.98898	0.99626	0.99921	0.99979	0.99992	0.99272	1	0.99709	1	1	0.98504	0.87189	0.99994	0.99141	0.99993	0.99987
0.92814	0.84223	0.9938	0.99562	0.99846	0.99973	0.99983	0.99569	0.99995	0.99657	0.99994	0.99994	0.98512	0.8554	0.99985	0.99484	0.99986	0.99981
0.95357	0.88048	0.97823	0.99581	0.99891	0.99881	0.99928	0.9844	0.99971	0.99712	0.99968	0.99968	0.99882	0.97832	0.99938	0.98337	0.99937	0.99908
0.95441	0.87716	0.98101	0.99538	0.99889	0.99903	0.99945	0.98647	0.99982	0.99665	0.99977	0.99978	0.98093	0.95628	0.99955	0.98443	0.99951	0.99926
0.93838	0.85697	0.9849	0.99821	0.99961	0.99949	0.99971	0.99016	0.99991	0.99871	0.99992	0.99992	0.98878	0.99884	0.99975	0.9889	0.99977	0.99965
0.96348	0.88969	0.97423	0.99361	0.99784	0.99763	0.9985	0.97952	0.99925	0.99599	0.99911	0.99911	0.9762	0.99634	0.99873	0.97861	0.99861	0.99806
0.98451	0.93186	0.96955	0.99488	0.99881	0.99645	0.99811	0.97016	0.99913	0.99759	0.99901	0.99902	0.99638	0.99651	0.99839	0.98358	0.99878	0.99778
0.96513	0.9054	0.97893	0.99286	0.99864	0.99834	0.99927	0.98024	0.99984	0.9959	0.99973	0.99973	0.98633	0.99679	0.99943	0.99113	0.99931	0.95163
0.96519	0.90596	0.98324	0.99058	0.998	0.99828	0.99936	0.9837	0.99992	0.99481	0.99975	0.99975	0.9865	0.9966	0.99954	0.99452	0.99932	0.99867
0.92793	0.84942	0.99864	0.99718	0.99827	0.99594	0.99999	0.99895	0.99991	0.99835	0.99855	0.99855	0.99376	0.99828	0.99999	0.99576	0.99857	0.99697
0.92368	0.83638	0.99832	0.99552	0.99778	0.99627	0.99992	0.99872	0.9999	0.9973	0.99813	0.99814	0.99286	0.99923	0.99992	0.99814	0.99859	0.9975
0.9178	0.82887	0.999	0.99422	0.99717	0.99514	0.99999	0.99913	1	0.99621	0.99722	0.99724	0.99218	0.99906	0.99999	0.99903	0.99783	0.99687
0.97097	0.91001	0.98095	0.99218	0.99754	0.99339	0.99591	0.98241	0.99736	0.99585	0.9964	0.9964	0.99244	0.98967	0.99668	0.99302	0.99395	0.99136
0.94604	0.87831	0.97259	0.99793	0.99921	0.9985	0.99897	0.98155	0.9994	0.99886	0.99951	0.99951	0.99852	0.96085	0.99905	0.98148	0.99916	0.99882
0.96966	0.90828	0.98346	0.9868	0.99575	0.99592	0.99824	0.98332	0.99943	0.99387	0.99874	0.99874	0.99582	0.99409	0.99824	0.99409	0.99797	0.99659
0.96475	0.90479	0.97507	0.99491	0.99903	0.99819	0.99908	0.9771	0.99971	0.99722	0.99965	0.99965	0.98914	0.99669	0.99923	0.9887	0.9992	0.99859
0.98041	0.92835	0.9791	0.99543	0.99955	0.99852	0.99954	0.97946	0.9997	0.99778	0.99983	0.99983	0.99849	0.9981	0.99954	0.99153	0.99971	0.99916
0.96309	0.90453	0.98529	0.99095	0.99803	0.99859	0.99954	0.98557	0.99997	0.99534	0.99986	0.99986	0.99856	0.99691	0.99969	0.99642	0.99949	0.95272
0.95929	0.90195	0.98635	0.99072	0.99795	0.99925	0.99982	0.98699	0.99999	0.99539	0.99998	0.99998	0.99924	0.99778	0.99989	0.99693	0.99979	0.99946
0.9495	0.89249	0.98816	0.99158	0.9977	0.9995	0.99984	0.98924	1	0.99636	0.99999	0.99999	0.99306	0.99818	0.99988	0.99805	0.99984	0.99964
0.93665	0.85613	0.99642	0.99328	0.99649	0.99234	0.99977	0.99682	0.9999	0.99532	0.99601	0.99602	0.98874	0.99786	0.99991	0.99973	0.99663	0.99439
0.95339	0.89778	0.98913	0.9895	0.99707	0.99972	0.99997	0.98993	0.99987	0.99542	0.99996	0.99996	0.99044	0.99855	0.99997	0.99813	0.99996	0.99982
0.94693	0.89179	0.9936	0.99487	0.99655	0.99984	0.99998	0.99374	0.99974	0.99757	0.9999	0.9999	0.99574	0.90016	0.99998	0.99964	0.99998	0.9999
0.93103	0.867	0.99088	0.995	0.99901	0.99995	0.99999	0.99401	0.99997	0.99673	0.99997	0.99997	0.99996	0.97056	0.99999	0.99473	0.99999	0.99997
0.94626	0.88831	0.98684	0.99187	0.99817	0.99968	0.99989	0.98941	1	0.99567	1	1	0.99967	0.99864	0.99992	0.99583	0.9999	0.99978
0.93443	0.86339	0.99778	0.99936	0.99839	0.99879	0.99996	0.99812	0.9998	0.99944	0.99961	0.99961	0.9985	0.99762	0.99997	0.9956	0.99931	0.99801
0.97898	0.93273	0.96522	0.97939	0.98656	0.97057	0.98851	0.9646	0.9914	0.98645	0.98377	0.98379	0.97195	0.98539	0.99161	0.98148	0.98585	0.97946
0.97955	0.93202	0.9682	0.98647	0.99184	0.98038	0.99221	0.97003	0.99499	0.99125	0.99027	0.99028	0.98035	0.98865	0.99471	0.98288	0.99056	0.98498
0.98462	0.92856	0.95177	0.99432	0.99655	0.99291	0.99551	0.9531	0.99697	0.99705	0.99704	0.99704	0.99286	0.97703	0.99608	0.96554	0.99626	0.9945
0.91543	0.83184	0.99371	0.99868	0.99982	0.99993	0.99998	0.99584	0.99999	0.999	0.99998	0.99998	0.99996	0.84532	0.99998	0.99542	0.99999	0.99998
0.91628	0.83963	0.99421	0.99777	0.99958	0.99997	0.99999	0.99617	0.99996	0.99833	0.99996	0.99996	0.99998	0.93991	0.99999	0.99583	0.99999	0.99999
0.93228	0.86892	0.99121	0.9941	0.99866	0.99996	0.99999	0.99418	0.99996	0.99621	0.99997	0.99997	0.99996	0.96805	0.99999	0.9952	0.99999	0.99998
0.96	0.89962	0.99153	0.99603	0.99817	0.99827	0.9997	0.9914	0.99999	0.99817	0.99989	0.99989	0.99659	0.99655	0.99984	0.99922	0.99951	0.99868
0.93527	0.85934	0.99745	0.99628	0.99783	0.99435	0.99991	0.998	1	0.99762	0.99775	0.99776	0.99207	0.99757	0.99997	0.99843	0.99781	0.99564
0.92582	0.84142	0.99839	0.99298	0.99623	0.99337	0.99995	0.99859	0.99997	0.9953	0.99298	0.99633	0.98937	0.99844	0.99997	0.99624	0.99703	0.99548
0.91749	0.83589	0.99918	0.99138	0.99561	0.99521	0.99991	0.99913	0.99982	0.99138	0.99138	0.99712	0.99137	0.99885	0.99991	1	0.99765	0.99713
0.96354	0.90915	0.98558	0.99239	0.99844	0.99961	0.99984	0.98633	0.99948	0.9968	0.99966	0.99966	0.99273	0.99872	0.99984	0.99659	0.99987	0.99979
0.95123	0.89609	0.98924	0.98958	0.99706	0.99983	0.99997	0.99032	0.99983	0.9954	0.99992	0.99992	0.99028	0.99881	0.99997	0.99813	0.99998	0.9999
0.9432	0.88297	0.99085	0.98854	0.99646	0.99989	0.99999	0.99298	0.99996	0.99325	0.99998	0.99998	0.99989	0.99914	0.99999	0.99655	0.99998	0.99993
0.96211	0.90359	0.98274	0.99152	0.99851	0.99894	0.99964	0.9839	0.99998	0.99509	0.99992	0.99992	0.98669	0.99747	0.99975	0.99393	0.99964	0.99922
0.94038	0.87832	0.98689	0.99428	0.999	0.99981	0.99993	0.99094	1	0.99638	1	1	0.99981	0.95159	0.99993	0.99328	0.99994	0.99987
0.94147	0.87284	0.98876	0.9936	0.99852	0.99985	0.99995	0.99234	0.99999	0.99535	1	1	0.99985	0.95083	0.99995	0.99261	0.99996	0.9999
0.9449	0.88211	0.97975	0.99662	0.99952	0.99933	0.99963	0.9859	0.99989	0.99779	0.99991	0.99991	0.99933	0.9983	0.99967	0.98827	0.9997	0.9995
0.94778	0.88726	0.98433	0.99322	0.9988	0.99955	0.99981	0.98798	0.99999	0.99581	0.99998	0.99998	0.99955	0.99849	0.99985	0.99234	0.99983	0.99968
0.94461	0.88626	0.99592	0.99741	0.99696	0.99968	0.99999	0.99588	0.99976	0.99843	0.99995	0.99995	0.99711	0.99822	0.99999	0.99833	0.99996	0.99979
0.94051	0.8727	0.9975	0.99812	0.99694	0.99645	0.99965	0.99744	1	0.99903	0.99919	0.9992	0.9952	0.99543	0.99965	0.99805	0.99868	0.99714
0.96954	0.91798	0.96757	0.9981	0.99941	0.99944	0.99977	0.97337	0.99961	0.9988	0.99966	0.99966	0.99195	0.97123	0.99978	0.98297	0.99867	0.99976
0.94555	0.88263	0.97814	0.99781	0.99986	0.9996	0.99982	0.98556	0.99997	0.99853	0.99998	0.99998	0.99961	0.96009	0.99985	0.98648	0.99988	0.99974
0.96869	0.90763	0.98381	0.9884	0.99629	0.99624	0.9984	0.98364	0.99952	0.99482	0.99892	0.99892	0.99615	0.99439	0.99885	0.99496	0.99818	0.99688
0.9597	0.9008	0.99099	0.98885	0.99629	0.99843	0.99966	0.99093	1	0.99495	0.99985	0.99986	0.99839	0.99658	0.99983	0.99908	0.99947	0.99879
0.95121	0.88933	0.99665	0.99306	0.99474	0.99891	0.99996	0.99664	0.99965	0.99706	0.99999	0.99999	0.99888	0.99731	0.99996	0.99826	0.99979	0.9992
0.93031	0.85404	0.99772	0.99831	0.99721	0.99804	0.99974	0.99848	0.99924	0.9992	0.99975	0.99975	0.99711	0.99886	0.99975	0.99819	0.99961	0.99856
0.92581	0.84279	0.99829	0.9969	0.99833	0.99658	0.99993	0.9988	0.9998	0.99821	0.99864	0.99865	0.99394	0.99903	0.99993	0.99705	0.99885	0.99759
0.92368	0.83915	0.9982	0.99743	0.9986	0.99742	0.99983	0.99879	0.99963	0.99861	0.99906	0.99907	0.99489	0.99931	0.99983	0.99626	0.99922	0.99821
0.95296	0.88857	0.99394	0.99738	0.99697	0.99524	0.99902	0.9941	0.99974	0.99832	0.99851	0.99851	0.99487	0.99397	0.9995	0.99921	0.99758	0.99536
0.94546	0.87958	0.99704	0.99695	0.99643	0.9972	0.99972	0.99697	1	0.99828	0.99952	0.99952	0.99562	0.99566	0.99993	0.99839	0.99902	0.99777
0.97687	0.92572	0.97353	0.98964	0.99422	0.98411	0.99432	0.97437	0.99669	0.99267	0.99272	0.99273	0.98417	0.99011	0.99612	0.9873	0.99209	0.98683
0.95445	0.89093	0.99432	0.99639	0.99747	0.99812	0.9998	0.99438	0.9995	0.99851	0.99988	0.99988	0.9981	0.99753	0.9998	0.99681	0.99966	0.99864
0.95563	0.88007	0.99187	0.98788	0.99301	0.98645	0.99831	0.99181	0.99885	0.99121	0.993	0.99303	0.98914	0.99489	0.99831	0.99964	0.99358	0.98984
0.97205	0.91035	0.9844	0.98195	0.99393	0.99379	0.99762	0.98418	0.9991	0.99206	0.99777	0.99777	0.99363	0.99244	0.99855	0.99376	0.99681	0.99466
0.96653	0.90162	0.98062	0.98801	0.9964	0.99729	0.99858	0.98192	0.99948	0.99246	0.99913	0.99914	0.99725	0.99556	0.9989	0.98869	0.99855	0.96404
0.96963	0.90341	0.97225	0.99276	0.99812	0.99736	0.99853	0.97562	0.99936	0.99571	0.99919	0.99919	0.99736	0.99602	0.99881	0.97998	0.99862	0.99787
0.98194	0.92356	0.95383	0.99493	0.99743	0.99469	0.99669	0.95666	0.99787	0.9975	0.99796	0.99796	0.99467	0.97747	0.99713	0.96564	0.99638	0.99598
0.9696	0.90837	0.96181	0.99709	0.99901	0.99771	0.99869	0.96838	0.99932	0.99852	0.99942	0.99942	0.99772	0.97262	0.99886	0.97245	0.99898	0.99834
0.93331	0.85919	0.98901	0.99752	0.99968	0.99988	0.99994	0.99308	0.99984	0.99812	0.99983	0.99983	0.9999	0.94886	0.99994	0.99235	0.99994	0.99995
0.96418	0.9015	0.98795	0.98842	0.99503	0.99287	0.99753	0.98768	0.99906	0.99662	0.99733	0.99733	0.99267	0.99188	0.99846	0.99736	0.99639	0.99381
0.97757	0.92342	0.97217	0.99542	0.99931	0.99831	0.99911	0.9738	0.99961	0.99722	0.99964	0.99964	0.9983	0.99778	0.99924	0.98584	0.99947	0.99901
0.96824	0.91039	0.98243	0.99055	0.99842	0.99875	0.99965	0.98318	0.99997	0.9944	0.99992	0.99992	0.98308	0.99733	0.99978	0.99328	0.99962	0.99909
0.95756	0.89551	0.99404	0.98534	0.99326	0.99645	0.99932	0.99393	0.99995	0.99409	0.99917	0.99917	0.98593	0.99462	0.99932	0.99945	0.99852	0.99708
0.93807	0.87852	0.99779	0.99792	0.99659	0.99982	0.99996	0.99778	0.99963	0.99829	0.99989	0.99989	0.99737	0.99848	0.99996	0.99592	0.99999	0.99989
0.93612	0.88021	0.99716	0.99792	0.99662	0.99995	0.99991	0.99718	0.99958	0.998	0.99978	0.99978	0.99995	0.99897	0.99991	0.99682	0.99998	0.99998
0.94498	0.88526	0.98786	0.99129	0.9979	0.99977	0.99994	0.99068	0.99999	0.99493	1	1	0.99977	0.99887	0.99996	0.99544	0.99994	0.99985
0.95199	0.89168	0.98566	0.99056	0.99785	0.9994	0.99977	0.988	0.99999	0.99412	0.99996	0.99996	0.9994	0.99818	0.99983	0.99427	0.99978	0.96294
0.9588	0.8995	0.98958	0.98378	0.99492	0.99815	0.99935	0.98973	0.99992	0.9908	0.99964	0.99964	0.99811	0.99625	0.99935	0.99763	0.99919	0.99854
0.95484	0.89515	0.99389	0.99174	0.99589	0.99862	0.99981	0.9938	0.99998	0.99647	0.99992	0.99992	0.99857	0.99675	0.99981	0.99964	0.99959	0.99895
0.95435	0.89745	0.99083	0.99364	0.99754	0.99945	0.99992	0.99091	0.99993	0.99764	1	1	0.99536	0.99793	0.99992	0.99946	0.99988	0.99961
0.97009	0.91402	0.98171	0.99123	0.99874	0.99911	0.99971	0.98271	0.99986	0.99471	0.99991	0.99992	0.98342	0.998	0.99977	0.99264	0.99979	0.99943
0.96971	0.91116	0.98803	0.98771	0.99688	0.99763	0.99954	0.98803	0.99996	0.99428	0.99975	0.99975	0.99759	0.99619	0.99954	0.99677	0.99926	0.99818
0.96079	0.89994	0.99239	0.99163	0.99643	0.99758	0.99961	0.9923	0.99999	0.99643	0.9997	0.9997	0.99751	0.99589	0.99984	0.99874	0.9992	0.99809
0.94393	0.87145	0.99499	0.99758	0.99701	0.99641	0.99986	0.99629	0.99975	0.99888	0.99922	0.99922	0.99398	0.99809	0.99986	0.99713	0.99903	0.99723
0.93752	0.85751	0.99445	0.99849	0.99821	0.99794	0.99968	0.99623	0.99931	0.99936	0.99966	0.99966	0.99598	0.99901	0.99968	0.99557	0.9996	0.99852
0.93502	0.86031	0.99641	0.99895	0.99842	0.99824	0.99981	0.99748	0.99931	0.99954	0.99986	0.99986	0.99752	0.99885	0.99981	0.99422	0.99971	0.9987
0.95946	0.89977	0.99333	0.99417	0.99708	0.99901	0.99988	0.99332	0.99963	0.99788	0.99997	0.99997	0.99899	0.99757	0.99992	0.99855	0.99984	0.93008
0.9552	0.88903	0.9918	0.9954	0.99611	0.99331	0.99945	0.99346	0.9999	0.99741	0.99783	0.9954	0.99217	0.99617	0.99974	0.9984	0.9975	0.99452
0.94631	0.88011	0.99623	0.99779	0.99798	0.99806	0.9999	0.99621	0.99963	0.99902	0.99991	0.99991	0.99663	0.99749	0.9999	0.99699	0.99963	0.99853
0.94837	0.88319	0.99657	0.99817	0.99795	0.99897	0.99994	0.99653	0.9995	0.99913	0.99998	0.99998	0.99895	0.99773	0.99994	0.99646	0.99986	0.99926
0.99086	0.94782	0.94591	0.99248	0.99431	0.98952	0.99301	0.94718	0.9948	0.99622	0.99496	0.99496	0.98938	0.97672	0.99368	0.94687	0.99513	0.99353
0.99158	0.94728	0.94821	0.98951	0.99466	0.98825	0.9926	0.94941	0.99485	0.99558	0.99438	0.99438	0.98805	0.99212	0.99361	0.96095	0.99468	0.99264
0.98213	0.93135	0.95351	0.99605	0.99701	0.99552	0.99699	0.95865	0.99785	0.99817	0.99807	0.99807	0.99553	0.98041	0.99727	0.96606	0.998	0.99743
0.95046	0.88312	0.98287	0.99537	0.99943	0.99975	0.99991	0.98819	0.99996	0.9966	0.99997	0.99997	0.98276	0.99905	0.99991	0.98832	0.99994	0.99985
0.93859	0.86945	0.9905	0.99423	0.99851	0.99993	0.99988	0.99387	0.99967	0.99566	0.99971	0.99971	0.99994	0.97481	0.99988	0.99355	0.99991	0.99993
0.93442	0.86117	0.98983	0.99603	0.99924	0.99988	0.99996	0.99334	0.99999	0.99704	1	1	0.99989	0.97812	0.99997	0.99276	0.99997	0.99993
0.9817	0.93146	0.95507	0.99632	0.99717	0.99588	0.99726	0.95994	0.99799	0.99821	0.99822	0.99822	0.99589	0.97959	0.99749	0.96842	0.99762	0.99764
0.95715	0.89868	0.97318	0.99758	0.99975	0.9994	0.99964	0.98085	0.99978	0.99836	0.99975	0.99975	0.98789	0.97887	0.99968	0.98332	0.99979	0.99969
0.97159	0.9164	0.98565	0.99393	0.99869	0.99892	0.9996	0.98584	0.99935	0.99781	0.99965	0.99965	0.99425	0.9981	0.9996	0.99581	0.9997	0.99938
0.95843	0.91333	0.99651	0.99003	0.99335	0.99049	0.9993	0.99658	0.99685	0.98449	0.98954	0.99003	0.98961	0.99644	0.9993	0.99863	0.98995	0.98941
0.97063	0.91636	0.97839	0.99322	0.99915	0.99915	0.9996	0.98037	0.99951	0.99582	0.99962	0.99962	0.98432	0.99854	0.99964	0.98994	0.99971	0.99954
0.96682	0.90894	0.98589	0.99079	0.99809	0.99859	0.99966	0.98602	0.99998	0.99542	0.99992	0.99992	0.99856	0.997	0.9998	0.99654	0.99958	0.99895
0.96147	0.89934	0.9781	0.99364	0.99907	0.99898	0.99957	0.98174	0.99994	0.99573	0.99989	0.99989	0.99898	0.96073	0.99967	0.98721	0.99961	0.99925
0.96929	0.91036	0.97902	0.99148	0.99871	0.99863	0.99953	0.98059	0.99994	0.99453	0.99987	0.99987	0.99862	0.99732	0.99968	0.9891	0.99953	0.999
0.9574	0.89822	0.98451	0.99062	0.99811	0.99957	0.9999	0.98683	0.99997	0.99393	0.99999	0.99999	0.98	0.99846	0.9999	0.99324	0.9999	0.99971
0.96948	0.90983	0.98611	0.98814	0.99671	0.99701	0.99909	0.98602	0.99988	0.99458	0.99942	0.99942	0.99694	0.99535	0.99946	0.99612	0.9988	0.94482
0.97821	0.92329	0.97778	0.99128	0.99826	0.9962	0.99655	0.98075	0.99784	0.99522	0.99712	0.99712	0.99507	0.99194	0.99716	0.98912	0.99483	0.99296
0.96599	0.90679	0.98958	0.99124	0.99581	0.99734	0.9989	0.9893	0.99977	0.99642	0.99815	0.99816	0.9961	0.99446	0.99946	0.99609	0.99745	0.99458
0.96957	0.90788	0.97752	0.99035	0.9975	0.99726	0.99866	0.97862	0.99955	0.99446	0.99926	0.99926	0.9753	0.99566	0.99897	0.98785	0.99866	0.99778
0.96023	0.90002	0.98452	0.98891	0.99718	0.99823	0.9992	0.98524	0.99983	0.9935	0.99962	0.99962	0.99819	0.99648	0.99939	0.99462	0.99918	0.9986
0.98062	0.93054	0.93564	0.99611	0.99251	0.99259	0.99441	0.94304	0.99519	0.99717	0.99618	0.99618	0.99264	0.98456	0.99475	0.95034	0.99663	0.99552
0.94809	0.86761	0.99169	0.97105	0.98106	0.97263	0.99575	0.99101	0.99364	0.9765	0.98277	0.98285	0.98106	0.98974	0.99574	0.99451	0.98368	0.97998
0.95648	0.89387	0.99264	0.99167	0.99288	0.99019	0.99896	0.99289	0.99953	0.99518	0.9959	0.99591	0.9906	0.99385	0.99968	0.9986	0.99546	0.99159
0.94685	0.88104	0.99671	0.99485	0.99527	0.99677	0.9999	0.99672	0.99994	0.99786	0.99945	0.99946	0.99669	0.99622	0.99996	0.9982	0.99895	0.99729
0.96131	0.90338	0.98602	0.98864	0.99741	0.99905	0.99975	0.98676	0.99999	0.99338	0.99996	0.99996	0.98322	0.99755	0.99985	0.9957	0.9997	0.94704
0.95411	0.88986	0.98272	0.99378	0.99905	0.9997	0.99991	0.98723	0.99997	0.99555	0.99998	0.99998	0.9997	0.97084	0.99993	0.98926	0.99993	0.99981
0.95112	0.88649	0.99521	0.99601	0.99665	0.99652	0.9997	0.99512	0.99999	0.99843	0.99939	0.99939	0.99464	0.99581	0.99991	0.99885	0.99887	0.99719
0.94702	0.882	0.9937	0.98839	0.99191	0.98418	0.99749	0.99349	0.99788	0.99121	0.99114	0.99115	0.98215	0.99093	0.99887	0.9995	0.9911	0.98628
0.92246	0.8471	0.98585	0.99959	0.99965	0.99953	0.99971	0.99077	0.99979	0.99975	0.99992	0.99992	0.99957	0.98812	0.99973	0.9903	0.99978	0.99968
0.96953	0.90849	0.98266	0.98789	0.99636	0.99647	0.99846	0.98263	0.99953	0.99409	0.999	0.999	0.9964	0.99465	0.99889	0.99355	0.99829	0.99708
0.9559	0.89449	0.97825	0.99597	0.99971	0.99964	0.99982	0.98424	0.99989	0.99719	0.99989	0.99989	0.98447	0.96207	0.99982	0.98649	0.99989	0.9998
0.9638	0.90403	0.96733	0.9979	0.99959	0.99886	0.99939	0.97486	0.99971	0.99867	0.99977	0.99977	0.99888	0.96974	0.99946	0.97807	0.99961	0.9993
0.94842	0.87946	0.98562	0.99474	0.99908	0.99985	0.99994	0.99027	0.99989	0.99606	0.99992	0.99992	0.99986	0.95518	0.99994	0.98993	0.99996	0.99992
0.97022	0.90959	0.98662	0.98535	0.9952	0.99466	0.99841	0.98645	0.99959	0.99435	0.99845	0.99846	0.99454	0.9936	0.99841	0.99567	0.99761	0.99551
0.96918	0.91049	0.98613	0.98739	0.997	0.99787	0.99944	0.98621	0.99997	0.99337	0.99973	0.99973	0.99783	0.99623	0.99943	0.99574	0.99924	0.94722
0.95946	0.89977	0.99333	0.99417	0.99708	0.99901	0.99988	0.99332	0.99963	0.99788	0.99997	0.99997	0.99899	0.99757	0.99992	0.99855	0.99984	0.93008
0.94588	0.88244	0.99771	0.99609	0.99541	0.99931	0.99995	0.99771	0.99943	0.99804	0.99997	0.99997	0.99522	0.99781	0.99995	0.99654	0.99992	0.9117
0.93904	0.87092	0.99864	0.99764	0.99652	0.99895	0.99994	0.99864	0.99946	0.99865	0.99999	0.99999	0.99719	0.99771	0.99995	0.99439	0.99983	0.99923
0.94145	0.87419	0.99828	0.99747	0.99661	0.99874	0.99998	0.99826	0.99958	0.99856	0.99998	0.99998	0.997	0.99745	0.99998	0.99555	0.99976	0.99906
0.93453	0.86444	0.99884	0.99759	0.99647	0.99877	0.99991	0.99904	0.99942	0.99855	0.99998	0.99998	0.99692	0.99782	0.99991	0.99403	0.99979	0.99909
0.96701	0.91124	0.97926	0.99321	0.99924	0.99937	0.99972	0.98147	0.99977	0.99577	0.99984	0.99984	0.98425	0.99851	0.99977	0.99053	0.99983	0.99964
0.95481	0.89397	0.98224	0.99331	0.99902	0.99964	0.9999	0.98616	0.99998	0.99551	0.99999	0.99999	0.99964	0.95696	0.99993	0.99067	0.99991	0.99976
0.95873	0.89928	0.97916	0.99385	0.99923	0.9992	0.99969	0.9825	0.99997	0.99605	0.99995	0.99995	0.98436	0.99798	0.99977	0.98917	0.99972	0.99942
0.96712	0.90921	0.98426	0.99283	0.99871	0.99858	0.9996	0.98439	0.99998	0.99653	0.99991	0.99991	0.99855	0.997	0.99974	0.99618	0.99957	0.95305
0.95491	0.8913	0.99383	0.99841	0.99746	0.99772	0.99943	0.99432	0.99997	0.99852	0.9991	0.9991	0.99678	0.99589	0.99943	0.99791	0.99826	0.99679
0.93306	0.85069	0.99688	0.99639	0.99819	0.99588	0.99992	0.99759	0.9999	0.99782	0.9983	0.99831	0.99303	0.99886	0.99992	0.99805	0.99858	0.99704
0.95596	0.89371	0.99393	0.99638	0.99762	0.99796	0.99974	0.99383	0.99998	0.99821	0.99983	0.99983	0.9964	0.99631	0.9999	0.99915	0.99941	0.99842
0.93807	0.86509	0.99725	0.99712	0.99725	0.99566	0.99994	0.99793	0.99991	0.99849	0.99874	0.99875	0.9951	0.99755	0.99994	0.99749	0.99856	0.9966
0.9356	0.86039	0.99738	0.99735	0.99838	0.99559	0.99994	0.998	0.99995	0.99846	0.99858	0.99859	0.99363	0.99785	0.99994	0.99758	0.9985	0.99659
0.9431	0.8721	0.99578	0.99767	0.99701	0.9963	0.9999	0.99688	0.99983	0.99891	0.9992	0.9992	0.99658	0.99768	0.9999	0.99723	0.99894	0.9971
0.96168	0.90666	0.9772	0.96034	0.97225	0.95649	0.98718	0.97673	0.98743	0.97506	0.97322	0.97328	0.96277	0.97831	0.99317	0.98798	0.97697	0.9695
0.97975	0.93594	0.96505	0.98052	0.9885	0.97645	0.9907	0.9661	0.99357	0.98952	0.98761	0.98763	0.97657	0.98713	0.99358	0.979	0.98895	0.98332
0.96265	0.90448	0.98819	0.99565	0.99881	0.99888	0.99977	0.98811	0.99997	0.99826	0.99997	0.99997	0.99565	0.99725	0.99977	0.99865	0.99973	0.93859
0.94514	0.8919	0.99278	0.98801	0.99529	0.99994	0.99994	0.99347	0.99965	0.99518	0.9998	0.9998	0.99125	0.90096	0.99994	0.99942	0.99997	0.99997
0.97719	0.92615	0.97612	0.98292	0.99443	0.98912	0.9963	0.97848	0.99818	0.99338	0.99529	0.9953	0.98797	0.99233	0.99629	0.98645	0.99482	0.9906
0.89391	0.79739	0.99326	0.99989	0.99948	0.99942	0.99987	0.99529	0.99954	0.99989	0.99989	0.99989	0.99885	0.91745	0.99987	0.99509	0.99933	0.99988
0.95084	0.88594	0.99495	0.99568	0.99468	0.99471	0.99921	0.99485	0.99989	0.99796	0.99844	0.99844	0.99458	0.99407	0.99971	0.99919	0.99776	0.99555
0.94241	0.88761	0.99287	0.99112	0.99589	0.99978	0.99997	0.99338	0.99996	0.99668	0.99999	0.99999	0.99392	0.89679	0.99997	0.99979	0.99995	0.99986
0.88499	0.8066	0.99618	0.9997	0.99971	0.99977	0.99981	0.99733	0.99702	0.9997	0.9997	0.9997	0.99984	0.99489	0.99981	0.99727	0.99982	0.99985
0.946	0.87996	0.99552	0.96755	0.9777	0.97778	0.99774	0.99572	0.99574	0.98233	0.98582	0.98589	0.98174	0.98926	0.99774	0.99797	0.98711	0.98393
0.93937	0.87052	0.99787	0.99848	0.9977	0.99939	0.99979	0.9982	0.99899	0.99903	0.99992	0.99992	0.99812	0.9984	0.99979	0.99286	0.99995	0.99958
0.98134	0.92489	0.97609	0.98897	0.99798	0.99426	0.99776	0.97598	0.99917	0.9951	0.99842	0.99842	0.98044	0.99423	0.99842	0.98728	0.99763	0.99549
0.90853	0.81734	0.98718	0.99956	0.99848	0.99884	0.99969	0.99165	0.99882	0.99956	0.99956	0.99956	0.99926	0.99704	0.9997	0.99137	0.99875	0.99976
0.95959	0.89674	0.9885	0.99385	0.99652	0.9983	0.99945	0.99191	0.99926	0.99756	0.99949	0.99949	0.99748	0.99749	0.99945	0.99475	0.99928	0.99788
0.95248	0.88246	0.9774	0.99729	0.99966	0.99937	0.9997	0.98457	0.99993	0.99808	0.99994	0.99994	0.99938	0.99855	0.99975	0.98365	0.99976	0.99957
0.90114	0.78794	1	0.99999	0.99997	1	1	1	1	0.99999	1	1	1	0.99999	1	1	1	1
0.96516	0.9057	0.97133	0.99625	0.9996	0.9987	0.9994	0.97568	0.99983	0.99771	0.99984	0.99984	0.98574	0.99757	0.9995	0.98352	0.99952	0.99906
0.96885	0.91032	0.98307	0.99301	0.99859	0.99806	0.99936	0.9831	0.99993	0.99666	0.99977	0.99977	0.99803	0.99643	0.99936	0.99545	0.99932	0.95399
0.94489	0.88455	0.98685	0.99232	0.99835	0.99974	0.99992	0.99014	1	0.99538	1	1	0.99974	0.99884	0.99994	0.99448	0.99992	0.99983
0.95019	0.88605	0.99621	0.99687	0.99713	0.99822	0.99991	0.99616	0.99988	0.99831	0.9999	0.9999	0.99658	0.99669	0.99997	0.99826	0.99955	0.99863
0.99129	0.94485	0.94808	0.99309	0.99564	0.9909	0.99367	0.95119	0.99547	0.9964	0.9954	0.9954	0.99051	0.99249	0.9944	0.96211	0.99497	0.99305
0.89463	0.79896	0.99591	0.9995	0.99924	0.99933	0.99992	0.99695	0.99901	0.9995	0.9995	0.9995	0.99957	0.99749	0.99992	0.99686	0.99897	0.99994
0.97527	0.91714	0.97056	0.99521	0.99926	0.99732	0.99872	0.9715	0.99953	0.99771	0.99946	0.99946	0.98775	0.99612	0.99872	0.98548	0.9989	0.99794
0.96054	0.90115	0.98543	0.98862	0.99742	0.99937	0.99985	0.987	0.99998	0.99248	0.99999	0.99999	0.97584	0.99809	0.99992	0.99375	0.99982	0.99955
0.93388	0.85648	0.98488	0.99916	0.99992	0.99972	0.99988	0.99054	0.99995	0.99939	0.99997	0.99997	0.99979	0.94949	0.99989	0.98967	0.99993	0.99988
0.89135	0.80491	0.99383	0.99978	0.99946	0.99955	0.99991	0.99579	0.99937	0.99978	0.99978	0.99978	0.99958	0.99659	0.99991	0.99567	0.99965	0.99992
0.93619	0.883	0.99424	0.99181	0.99527	0.99994	1	0.99492	0.99992	0.99658	0.99996	0.99996	0.99994	0.89222	1	0.99988	0.99999	0.99996
0.92107	0.84867	0.99455	0.99592	0.99891	0.99998	0.99999	0.99643	0.99993	0.997	0.99994	0.99994	0.99999	0.97778	0.99999	0.99616	0.99999	0.99999
0.95004	0.88796	0.99548	0.9969	0.99721	0.99858	0.99984	0.99539	0.99996	0.99836	0.99992	0.99992	0.99706	0.99672	0.99984	0.99898	0.9996	0.99893
0.94992	0.89138	0.99483	0.99493	0.99633	0.99936	0.99996	0.99478	0.99986	0.99789	1	1	0.99548	0.9977	0.99996	0.99929	0.99987	0.92495
0.942	0.88441	0.99635	0.99763	0.99683	0.99981	0.99998	0.99633	0.99969	0.9983	0.9999	0.9999	0.99727	0.9985	0.99998	0.99792	0.99999	0.99988
0.95028	0.89536	0.98921	0.99135	0.99748	0.99985	0.99997	0.99026	0.99982	0.99647	0.99991	0.99991	0.99305	0.99886	0.99997	0.99849	0.99998	0.99991
0.97932	0.9218	0.9699	0.99385	0.99917	0.99722	0.99872	0.9712	0.99953	0.99674	0.99943	0.99943	0.9972	0.99638	0.99899	0.98236	0.99893	0.99798
0.96567	0.90346	0.97178	0.99586	0.99947	0.99873	0.99941	0.97692	0.99984	0.99733	0.99983	0.99983	0.98146	0.96678	0.99953	0.98111	0.99952	0.9991
0.97293	0.91422	0.98444	0.98888	0.99735	0.99705	0.99916	0.98442	0.9999	0.99486	0.99952	0.99952	0.997	0.99566	0.99951	0.99478	0.99892	0.95014
0.95073	0.89452	0.98578	0.99216	0.99844	0.99983	0.99996	0.98831	0.99989	0.99591	0.99993	0.99993	0.99983	0.99894	0.99996	0.99528	0.99997	0.9999
0.95132	0.89502	0.98698	0.99047	0.99779	0.99983	0.99996	0.98911	0.99986	0.9948	0.99993	0.99993	0.99983	0.99893	0.99996	0.99595	0.99997	0.9999
0.90136	0.82224	0.99611	0.99888	0.99983	0.99997	0.99999	0.99733	0.99695	0.99915	0.99994	0.99994	0.99999	0.98711	0.99999	0.99715	0.99999	0.99999
0.91858	0.84728	0.99457	0.99649	0.99917	0.99998	0.99999	0.99642	0.99576	0.99745	0.99994	0.99994	0.99999	0.94267	0.99999	0.99621	0.99999	0.99999
0.89319	0.79722	0.99704	0.99952	0.99952	0.99945	0.99978	0.99792	0.99937	0.99952	0.99952	0.99952	0.99919	0.99985	0.99978	0.99788	0.99935	0.9998
0.89032	0.79123	0.99848	0.99991	0.99994	0.99983	0.99996	0.9989	0.99988	0.99991	0.99991	0.99991	0.99896	0.99641	0.99996	0.99885	0.9998	0.99997
0.94211	0.88919	0.99545	0.98902	0.99357	0.99995	0.99992	0.9957	0.99958	0.99544	0.99979	0.99979	0.99229	0.8976	0.99992	0.99945	0.99998	0.99997
0.94283	0.88334	0.99171	0.98729	0.99579	0.99991	0.99999	0.99351	0.99995	0.99281	0.99998	0.99998	0.99991	0.99916	1	0.99762	0.99998	0.99994
0.95333	0.89536	0.99498	0.99205	0.99536	0.99954	0.99996	0.995	0.99952	0.99704	0.99992	0.99992	0.99953	0.99808	0.99996	0.99889	0.99995	0.92928
0.98681	0.93882	0.96631	0.98785	0.99684	0.99486	0.99408	0.97104	0.99644	0.99137	0.9952	0.9952	0.99343	0.99001	0.99582	0.97324	0.99342	0.99059
0.98797	0.94306	0.93489	0.99491	0.99246	0.98998	0.99229	0.93959	0.99367	0.99486	0.99438	0.99438	0.98966	0.9822	0.99282	0.95187	0.99358	0.99175
0.98789	0.94023	0.93712	0.99482	0.99321	0.99017	0.99274	0.94098	0.99422	0.99532	0.99475	0.99475	0.98993	0.98199	0.99336	0.95253	0.99394	0.99205
0.91378	0.82786	0.98424	0.99956	0.99816	0.99882	0.99958	0.98985	0.99859	0.99956	0.99956	0.99956	0.99947	0.99519	0.9996	0.98952	0.99896	0.99964
0.91378	0.82786	0.98424	0.99956	0.99816	0.99882	0.99958	0.98985	0.99859	0.99956	0.99956	0.99956	0.99947	0.99519	0.9996	0.98952	0.99896	0.99964
0.91673	0.84106	0.98575	0.99995	0.99915	0.99952	0.99982	0.99085	0.9993	0.99997	0.99995	0.99995	0.99973	0.9447	0.99983	0.99053	0.9999	0.99984
0.97096	0.91347	0.98484	0.99114	0.99837	0.99831	0.9996	0.98495	0.99995	0.99561	0.99988	0.99988	0.98909	0.99689	0.9996	0.99565	0.99953	0.94779
0.92286	0.83599	0.99871	0.99433	0.99686	0.996	0.99987	0.99899	0.99989	0.99668	0.99793	0.99795	0.99126	0.99919	0.99987	0.9984	0.99844	0.99733
0.91474	0.82586	0.99908	0.98658	0.99205	0.99026	0.99978	0.99901	0.99934	0.99098	0.99412	0.98658	0.98409	0.99786	0.99997	0.99997	0.99496	0.99403
0.91318	0.82502	0.99921	0.98621	0.99196	0.99167	0.99983	0.99916	0.99934	0.99138	0.98621	0.99507	0.98511	0.99834	0.99998	0.9999	0.9957	0.99509
0.90708	0.81524	0.99967	0.98845	0.99325	0.99336	0.99997	0.99965	0.99975	0.99285	0.98845	0.99609	0.9874	0.99873	1	0.99997	0.99659	0.99605
0.91974	0.83429	0.99931	0.99184	0.99523	0.99384	0.99999	0.9994	0.99999	0.99483	0.99649	0.99651	0.98828	0.99864	0.99999	0.9947	0.99719	0.99593
0.97594	0.92062	0.98245	0.98979	0.99788	0.99711	0.99791	0.98453	0.9993	0.99455	0.99824	0.99824	0.99628	0.99436	0.99791	0.99111	0.99705	0.99523
0.98196	0.92508	0.97318	0.99151	0.99863	0.99544	0.99804	0.97328	0.99926	0.99611	0.99885	0.99885	0.99537	0.99488	0.99852	0.98594	0.99812	0.99646
0.91378	0.82786	0.98424	0.99956	0.99816	0.99882	0.99958	0.98985	0.99859	0.99956	0.99956	0.99956	0.99947	0.99519	0.9996	0.98952	0.99896	0.99964
0.89404	0.79923	0.99762	0.99946	0.99941	0.99947	0.99997	0.99816	0.99908	0.99946	0.99946	0.99946	0.99987	0.99819	0.99997	0.99812	0.99918	0.99998
0.92762	0.85778	0.98299	0.99937	0.99961	0.99944	0.99963	0.98905	0.99974	0.99962	0.99989	0.99989	0.99946	0.98549	0.99966	0.98862	0.99973	0.99959
0.97156	0.90939	0.98146	0.98691	0.99584	0.99243	0.99652	0.98106	0.99837	0.99491	0.99693	0.99693	0.99224	0.99125	0.99749	0.99313	0.99587	0.99338
0.95189	0.88991	0.99556	0.99683	0.99726	0.99898	0.99995	0.99552	0.99976	0.99857	0.99999	0.99999	0.99656	0.99736	0.99997	0.99828	0.99981	0.92075
0.95616	0.89668	0.99385	0.99434	0.99685	0.99909	0.99994	0.99382	0.99979	0.99782	0.99999	0.99999	0.99474	0.99747	0.99994	0.99918	0.99983	0.99935
0.93246	0.84987	0.99757	0.99346	0.99697	0.99547	0.99977	0.99757	0.99997	0.99597	0.99346	0.99346	0.99116	0.99851	0.99977	0.99966	0.99808	0.99696
0.92738	0.84017	0.99836	0.99246	0.99592	0.99448	0.99993	0.99849	1	0.99532	0.99692	0.99694	0.989	0.99882	0.99993	0.99947	0.99764	0.9963
0.96914	0.9108	0.98384	0.99024	0.99809	0.99824	0.99948	0.98406	0.99997	0.9948	0.99982	0.99982	0.98629	0.99667	0.99968	0.99487	0.9994	0.99866
0.96291	0.90639	0.98661	0.99212	0.99833	0.99933	0.99988	0.98694	0.9999	0.99665	0.99998	0.99998	0.99932	0.99794	0.99991	0.99733	0.99987	0.99955
0.91993	0.85334	0.9898	0.99899	0.99992	0.99989	0.99994	0.9935	0.99985	0.99926	0.99984	0.99984	0.99992	0.98442	0.99994	0.99328	0.99994	0.99995
0.94208	0.88154	0.98418	0.99531	0.99941	0.99968	0.99986	0.98892	0.99999	0.99713	0.99999	0.99999	0.99968	0.99879	0.99986	0.99222	0.99989	0.99978
0.93923	0.87421	0.9853	0.99604	0.99952	0.99972	0.99987	0.99018	0.99999	0.99731	0.99999	0.99999	0.99972	0.95379	0.9999	0.99104	0.9999	0.99981
0.95153	0.89318	0.98404	0.99336	0.99877	0.99932	0.99971	0.98622	0.99997	0.99657	0.99995	0.99995	0.99931	0.99801	0.99971	0.99529	0.99974	0.96132
0.95441	0.89783	0.98774	0.98849	0.99707	0.99972	0.99996	0.98921	0.99989	0.99345	0.99996	0.99996	0.98274	0.99864	0.99996	0.99632	0.99995	0.99982
0.9498	0.88943	0.99564	0.99515	0.99613	0.99902	0.99993	0.99557	0.9999	0.99786	0.99998	0.99998	0.99501	0.99722	0.99999	0.99903	0.99976	0.99928
0.93147	0.85989	0.99848	0.99841	0.99767	0.99902	0.99977	0.99873	0.99905	0.99911	0.99999	0.99999	0.99757	0.99849	0.99977	0.99366	0.99989	0.99929
0.92608	0.8503	0.99856	0.99844	0.99728	0.99819	0.99977	0.99903	0.99928	0.99901	0.9998	0.9998	0.99861	0.99873	0.99977	0.99885	0.99963	0.99867
0.94945	0.88708	0.97554	0.99767	0.99981	0.99938	0.9997	0.98318	0.99993	0.99846	0.99996	0.99996	0.99939	0.96178	0.99974	0.98491	0.99978	0.99957
0.96647	0.90618	0.98011	0.99078	0.99806	0.99816	0.99922	0.98128	0.99984	0.99442	0.99967	0.99967	0.97927	0.99659	0.99942	0.99066	0.99921	0.99856
0.9333	0.86682	0.98752	0.99681	0.99966	0.99983	0.99993	0.99186	1	0.99781	1	1	0.99983	0.9992	0.99993	0.99201	0.99994	0.99989
0.95744	0.89885	0.99209	0.99606	0.99804	0.99925	0.99992	0.99203	0.99983	0.99849	0.99998	0.99998	0.99618	0.99768	0.99995	0.99923	0.99987	0.99948
0.94276	0.87572	0.99681	0.99799	0.99705	0.99617	0.99967	0.99674	1	0.99901	0.99914	0.99915	0.99478	0.99562	0.99967	0.9986	0.99863	0.99689
0.95534	0.89845	0.99094	0.99106	0.99691	0.99938	0.99992	0.99105	0.99994	0.99662	1	1	0.99353	0.99784	0.99992	0.99928	0.99986	0.99956
0.96107	0.90296	0.98546	0.99398	0.99873	0.99884	0.99963	0.98563	0.99999	0.99727	0.99993	0.99993	0.99446	0.99719	0.99963	0.99749	0.99962	0.99913
0.96139	0.89836	0.98906	0.99139	0.99574	0.99286	0.99764	0.98881	0.99913	0.99732	0.99734	0.99735	0.99265	0.992	0.99763	0.99811	0.99644	0.99381
0.96513	0.9054	0.97893	0.99286	0.99864	0.99834	0.99927	0.98024	0.99984	0.9959	0.99973	0.99973	0.98633	0.99679	0.99943	0.99113	0.99931	0.95163
0.9234	0.83546	0.99052	0.99916	0.99988	0.99977	0.9999	0.99381	0.99998	0.99939	0.99999	0.99999	0.99983	0.84924	0.99992	0.99316	0.99993	0.99988
0.98907	0.9531	0.93887	0.98649	0.98853	0.98537	0.98602	0.94487	0.98991	0.9893	0.98688	0.9869	0.98242	0.98504	0.98939	0.94972	0.98793	0.98369
0.90159	0.79811	0.99842	0.99974	0.99978	0.99961	0.99998	0.99883	0.99963	0.99974	0.99974	0.99974	0.99979	0.81529	0.99998	0.9988	0.99943	0.99998
0.97159	0.91415	0.91523	0.99335	0.98509	0.98929	0.99132	0.93152	0.98996	0.99325	0.99333	0.99332	0.98968	0.98166	0.99161	0.92939	0.99263	0.99286
0.89984	0.79466	0.99925	0.99985	0.9999	0.9998	0.99992	0.99945	0.99984	0.99985	0.99985	0.99985	0.99958	0.99808	0.99992	0.99944	0.99974	0.99993
0.92556	0.8489	0.98509	0.99979	0.99967	0.99963	0.99985	0.99064	0.99984	0.99986	0.99996	0.99996	0.99976	0.99	0.99986	0.9901	0.99992	0.99986
0.9154	0.8315	0.98823	0.99981	0.99955	0.99949	0.99973	0.99218	0.99972	0.99991	0.99991	0.99991	0.99962	0.99151	0.99974	0.99178	0.9998	0.99972
0.97885	0.9177	0.97114	0.98864	0.99664	0.99209	0.99567	0.97077	0.99757	0.99479	0.99664	0.99664	0.97873	0.99124	0.99654	0.98448	0.99551	0.99312
0.91986	0.83761	0.99944	0.99661	0.99795	0.99609	0.99997	0.99958	0.99991	0.99798	0.99833	0.99834	0.9935	0.99865	0.99997	0.99939	0.99851	0.99723
0.94403	0.87724	0.99735	0.9977	0.99636	0.99711	0.99988	0.9973	0.99994	0.99843	0.99955	0.99955	0.99527	0.99617	0.99998	0.99826	0.99909	0.9977
0.93704	0.86704	0.99699	0.99904	0.99769	0.9991	0.99989	0.99777	0.99936	0.99904	0.99991	0.99991	0.99812	0.99831	0.99989	0.99483	0.99969	0.99886
0.92883	0.84989	0.99795	0.99772	0.99717	0.9975	0.99978	0.99864	0.99943	0.99895	0.99941	0.99942	0.99485	0.99895	0.99978	0.9946	0.99936	0.99817
0.95823	0.89831	0.98775	0.99369	0.99769	0.99794	0.99913	0.98758	0.99983	0.99698	0.99958	0.99958	0.99383	0.99593	0.99913	0.99867	0.9991	0.99837
0.94453	0.8753	0.99844	0.98201	0.98797	0.98781	0.99922	0.99846	0.99886	0.99112	0.9937	0.99373	0.97723	0.99374	0.99974	0.99951	0.99432	0.9923
0.94352	0.87379	0.99856	0.98274	0.9885	0.98807	0.9993	0.99858	0.99893	0.99128	0.99416	0.99419	0.97819	0.99413	0.9993	0.99949	0.99465	0.99287
0.93866	0.87011	0.99907	0.9874	0.99182	0.99128	0.99956	0.99907	0.99934	0.99319	0.99586	0.99589	0.98464	0.99554	0.99955	0.99109	0.99618	0.99502
0.94071	0.87826	0.99926	0.98903	0.99266	0.9922	0.99958	0.99929	0.99944	0.99565	0.99561	0.99563	0.99039	0.99515	0.99957	0.99989	0.99584	0.99412
0.91923	0.84424	0.98398	0.9992	0.99818	0.99896	0.99952	0.9901	0.99839	0.9992	0.9992	0.9992	0.99946	0.94488	0.99952	0.98984	0.99936	0.99954
0.94793	0.89335	0.99495	0.98444	0.99319	0.99978	0.99998	0.99512	0.9997	0.99443	0.99992	0.99992	0.98917	0.99853	0.99998	0.99962	0.99998	0.99986
0.9463	0.88458	0.99565	0.99709	0.99698	0.99846	0.99968	0.9955	1	0.99831	0.99982	0.99982	0.9971	0.99642	0.99968	0.99914	0.99945	0.99882
0.95432	0.89431	0.98503	0.99027	0.99779	0.99917	0.99966	0.98695	0.99997	0.99397	0.99991	0.99991	0.99916	0.9978	0.99966	0.99421	0.99966	0.99938
0.95084	0.88877	0.98633	0.99053	0.99775	0.99954	0.99983	0.98908	1	0.99376	0.99998	0.99998	0.99954	0.99845	0.99988	0.99369	0.99984	0.99967
0.98063	0.92076	0.97619	0.98423	0.99615	0.99303	0.99699	0.97608	0.99864	0.99225	0.99748	0.99748	0.96668	0.9925	0.998	0.98628	0.99646	0.9941
0.96106	0.88921	0.96134	0.99808	0.99835	0.99775	0.99854	0.97294	0.99905	0.99902	0.99923	0.99923	0.99784	0.96746	0.99869	0.97018	0.99883	0.99835
0.91996	0.81436	0.99479	0.99765	0.9977	0.99761	0.99949	0.99628	0.99739	0.99765	0.99765	0.99765	0.99955	0.83284	0.9995	0.99622	0.99711	0.99966
0.91678	0.81261	0.99222	0.99825	0.99781	0.99785	0.99964	0.99466	0.9978	0.99825	0.99825	0.99825	0.99954	0.99888	0.99965	0.99453	0.99696	0.99979
0.95035	0.89494	0.99064	0.98618	0.99566	0.99988	0.99997	0.99181	0.99974	0.99278	0.99988	0.99988	0.99988	0.99899	0.99997	0.99782	0.99998	0.99993
0.94108	0.88855	0.99447	0.99252	0.99509	0.99996	0.9999	0.99488	0.99959	0.99627	0.99974	0.99974	0.99996	0.99924	0.9999	0.99958	0.99996	0.99998
0.94511	0.88607	0.99557	0.99541	0.9959	0.99909	0.99984	0.99546	0.99999	0.99791	0.99995	0.99995	0.99546	0.99725	0.99993	0.99937	0.99971	0.99933
0.9512	0.89413	0.99198	0.98574	0.99497	0.99918	0.99979	0.99219	1	0.9936	0.99995	0.99995	0.98845	0.99755	0.99979	0.99933	0.99972	0.99939
0.95045	0.89333	0.99065	0.98549	0.99535	0.99944	0.99986	0.99137	1	0.99228	0.99998	0.99998	0.98338	0.99807	0.99986	0.99823	0.99982	0.9996
0.91943	0.84288	0.99181	0.99856	0.99988	0.99991	0.99997	0.99461	1	0.99894	0.99999	0.99999	0.99992	0.99955	0.99997	0.9942	0.99998	0.99995
0.95274	0.88869	0.9944	0.99673	0.99495	0.99626	0.99866	0.99502	0.99955	0.99692	0.99808	0.99809	0.99529	0.99347	0.9995	0.9993	0.99658	0.99462
0.97883	0.92107	0.98022	0.98655	0.99697	0.99482	0.99827	0.98014	0.9995	0.99396	0.99867	0.99868	0.99473	0.99437	0.99827	0.99022	0.99788	0.99585
0.97745	0.91715	0.96066	0.99424	0.99793	0.99501	0.99695	0.96215	0.99815	0.99712	0.99812	0.99812	0.99498	0.99409	0.99734	0.97476	0.99727	0.99588
0.89963	0.79566	0.99693	0.99991	0.99983	0.99961	0.99997	0.99781	0.99979	0.99991	0.99991	0.99991	0.99996	0.91522	0.99997	0.99771	0.99943	0.99998
0.90989	0.7898	0.99976	0.99998	0.99994	0.99997	1	0.99981	1	0.99999	1	1	0.99945	0.81203	1	0.99979	0.99993	1
0.94425	0.87001	0.97294	0.99914	0.99914	0.99891	0.99933	0.98292	0.9996	0.99957	0.99973	0.99974	0.9909	0.95829	0.99938	0.98154	0.99949	0.99925
0.96277	0.90446	0.98626	0.98814	0.99721	0.99877	0.99965	0.98674	0.99999	0.9932	0.9999	0.9999	0.99875	0.99716	0.99979	0.99592	0.99957	0.99907
0.95278	0.89291	0.9949	0.99209	0.99545	0.99877	0.99988	0.99483	0.99994	0.99668	0.99995	0.99995	0.99873	0.99693	0.99988	0.99964	0.99966	0.99908
0.93786	0.88365	0.99663	0.99667	0.9954	0.99996	0.9999	0.99671	0.99957	0.99732	0.99977	0.99977	0.99996	0.99904	0.9999	0.99812	0.99997	0.99998
0.94345	0.88544	0.99626	0.99333	0.99442	0.99927	0.99991	0.99621	0.99998	0.99717	0.99998	0.99998	0.99446	0.99753	0.99997	0.99928	0.99979	0.92193
0.94248	0.8838	0.99662	0.99762	0.99681	0.99974	0.99999	0.9966	0.99971	0.99839	0.99993	0.99993	0.99721	0.99831	0.99999	0.99769	0.99998	0.99983
0.93268	0.85637	0.98918	0.99726	0.9996	0.99983	0.99993	0.99295	1	0.99795	1	1	0.99984	0.98168	0.99994	0.99218	0.99995	0.99989
0.98165	0.91495	0.96535	0.98584	0.99554	0.99192	0.99501	0.96603	0.99685	0.99201	0.99602	0.99602	0.99184	0.99097	0.99608	0.97274	0.99487	0.99292
0.97455	0.91374	0.97838	0.98864	0.99738	0.9973	0.99891	0.97925	0.99973	0.9932	0.99941	0.99941	0.99727	0.99589	0.99927	0.98738	0.99882	0.99787
0.9059	0.7979	0.99821	0.99982	0.99984	0.99961	0.99997	0.99871	0.99975	0.99982	0.99982	0.99982	0.99964	0.99808	0.99997	0.99866	0.99942	0.99997
0.89001	0.79869	0.99381	0.99991	0.9995	0.99954	0.9999	0.99561	0.99947	0.99991	0.99991	0.99991	0.99986	0.99618	0.9999	0.99544	0.99955	0.99991
0.95895	0.8985	0.98414	0.99048	0.99808	0.99951	0.99988	0.98657	0.99998	0.99356	0.99999	0.99999	0.97737	0.99838	0.99993	0.99231	0.99987	0.99966
0.95181	0.89517	0.99327	0.99132	0.99598	0.99953	0.99997	0.99332	0.99986	0.99686	0.99999	0.99999	0.9939	0.99802	0.99997	0.99964	0.99991	0.99967
0.9482	0.89123	0.98972	0.98796	0.9964	0.99961	0.9999	0.9909	0.99999	0.99392	1	1	0.9869	0.99841	0.99994	0.99779	0.99988	0.95243
0.94644	0.89219	0.99362	0.99168	0.99563	0.99988	0.99997	0.99389	0.9997	0.99661	0.99987	0.99987	0.99397	0.90075	0.99997	0.99963	0.99999	0.99993
0.93351	0.85929	0.99263	0.99423	0.9983	0.99996	0.99999	0.99516	0.99995	0.99561	0.99997	0.99997	0.99997	0.87144	0.99999	0.99461	0.99999	0.99998
0.89646	0.78994	0.9992	0.99983	0.99987	0.99986	0.99989	0.99944	0.99986	0.99983	0.99984	0.99984	0.99866	0.99644	0.99989	0.99941	0.99987	0.99991
0.90082	0.78554	1	0.99986	0.99974	1	1	1	1	0.99989	1	1	0.9993	0.80499	1	1	1	1
0.97663	0.91912	0.93975	0.99705	0.99418	0.99403	0.99569	0.94777	0.99639	0.99768	0.99718	0.99718	0.9941	0.98124	0.99599	0.95237	0.99687	0.99584
0.98686	0.9558	0.93171	0.98115	0.98561	0.97892	0.98314	0.93337	0.98726	0.98689	0.98368	0.9837	0.97565	0.98283	0.98699	0.94187	0.9854	0.98103
0.98389	0.92591	0.95422	0.99491	0.99769	0.9952	0.99689	0.95863	0.99799	0.99771	0.99803	0.99803	0.99521	0.97968	0.99731	0.96254	0.99785	0.9969
0.98599	0.9295	0.96559	0.99015	0.99767	0.99319	0.99652	0.96579	0.99818	0.99524	0.9976	0.9976	0.9931	0.9934	0.99729	0.97768	0.99674	0.99463
0.96334	0.90125	0.93868	0.99759	0.99244	0.99511	0.99636	0.95818	0.99544	0.99767	0.99753	0.99752	0.99552	0.97532	0.99649	0.95501	0.99745	0.99722
0.98604	0.95045	0.94539	0.98016	0.98846	0.97998	0.98766	0.94993	0.99117	0.98961	0.98732	0.98733	0.97626	0.98605	0.99036	0.95851	0.9886	0.98414
0.97629	0.9154	0.96532	0.99601	0.99921	0.99782	0.99879	0.97021	0.9994	0.99772	0.99941	0.99941	0.99784	0.97359	0.99898	0.9735	0.99917	0.99861
0.96919	0.90261	0.96357	0.99747	0.99916	0.99808	0.99889	0.97192	0.99942	0.99867	0.9995	0.9995	0.99812	0.9713	0.99905	0.97082	0.99919	0.99871
0.97092	0.90404	0.95951	0.99705	0.99857	0.99732	0.99836	0.96799	0.99903	0.99851	0.99914	0.99914	0.99737	0.97277	0.99858	0.96692	0.99871	0.99807
0.97606	0.91143	0.96975	0.99454	0.9991	0.99806	0.99905	0.97404	0.99965	0.99662	0.99959	0.99959	0.99806	0.97076	0.99927	0.97577	0.99924	0.99866
0.95504	0.87638	0.96536	0.99896	0.99832	0.99816	0.99887	0.97767	0.99923	0.99949	0.99942	0.99943	0.99839	0.96101	0.99897	0.97518	0.99916	0.99884
0.93901	0.87045	0.99702	0.99708	0.99665	0.99845	0.99984	0.9977	0.99925	0.99859	0.99996	0.99996	0.9963	0.9981	0.99984	0.99515	0.99976	0.99885
0.93487	0.85593	0.99571	0.99809	0.99714	0.99807	0.99958	0.99716	0.99908	0.99923	0.99972	0.99972	0.9955	0.99908	0.99958	0.99505	0.99964	0.99861
0.92336	0.84239	0.99883	0.99724	0.99794	0.99723	0.99979	0.99923	0.99957	0.99863	0.99914	0.99914	0.99429	0.99898	0.99979	0.99888	0.99917	0.99801
0.92986	0.85696	0.99838	0.99905	0.99735	0.99909	0.99989	0.9988	0.99943	0.99901	0.99981	0.99981	0.99851	0.99827	0.99989	0.99883	0.99958	0.99852
0.92608	0.8503	0.99856	0.99844	0.99728	0.99819	0.99977	0.99903	0.99928	0.99901	0.9998	0.9998	0.99861	0.99873	0.99977	0.99885	0.99963	0.99867
0.94065	0.86005	0.99589	0.99234	0.99584	0.99223	0.99973	0.99615	0.9999	0.99485	0.996	0.99602	0.98732	0.99779	0.99973	0.99986	0.99661	0.99425
0.94221	0.85812	0.99601	0.99132	0.99542	0.99229	0.99956	0.99598	0.99983	0.99412	0.99586	0.99589	0.98665	0.99761	0.99956	0.99871	0.99655	0.99445
0.94514	0.86404	0.99598	0.98959	0.99441	0.99092	0.99924	0.99582	0.99958	0.99272	0.99506	0.99509	0.99341	0.99677	0.99924	0.99997	0.99579	0.99375
0.9494	0.87129	0.99397	0.99137	0.99503	0.99126	0.99933	0.99412	0.99973	0.99422	0.99581	0.99583	0.98522	0.99693	0.99933	0.99998	0.99624	0.99338
0.95263	0.8744	0.99414	0.98882	0.99356	0.98827	0.99847	0.99388	0.99913	0.99225	0.994	0.99402	0.99108	0.99521	0.99903	0.99988	0.99499	0.99243
0.97934	0.91799	0.9729	0.99069	0.99816	0.9971	0.99872	0.97453	0.99959	0.99451	0.99933	0.99933	0.99708	0.99609	0.99911	0.98094	0.99876	0.99779
0.90633	0.79607	0.99519	0.99996	0.9998	0.99966	0.99991	0.996	0.99988	0.99996	0.99996	0.99996	0.99987	0.81397	0.99991	0.99572	0.99932	0.99992
0.90769	0.80595	0.99221	0.99994	0.99974	0.99945	0.99986	0.99478	0.99988	0.99997	0.99996	0.99996	0.9998	0.99624	0.99987	0.99442	0.9995	0.99986
0.89951	0.79338	0.99497	0.99998	0.99989	0.99966	0.99993	0.99635	0.99994	0.99999	0.99998	0.99998	0.99991	0.99567	0.99994	0.99607	0.99953	0.99994
0.90018	0.78764	1	1	1	1	1	1	1	1	1	1	1	1	1	0.98599	1	1
0.89526	0.80047	0.99543	0.99992	0.99997	0.99981	0.99997	0.99685	0.99998	0.99994	0.99999	0.99999	0.99996	0.8156	0.99998	0.99665	0.99994	0.99998
0.95006	0.89539	0.99046	0.9889	0.99651	0.99986	0.99997	0.99132	0.99978	0.99535	0.9999	0.9999	0.99058	0.99886	0.99997	0.99872	0.99998	0.99991
0.95006	0.89539	0.99046	0.9889	0.99651	0.99986	0.99997	0.99132	0.99978	0.99535	0.9999	0.9999	0.99058	0.99886	0.99997	0.99872	0.99998	0.99991
0.94836	0.88626	0.9966	0.99723	0.99694	0.99939	0.99997	0.99657	0.99954	0.99856	0.99996	0.99996	0.9965	0.99787	0.99997	0.99727	0.99993	0.91877
0.95529	0.8987	0.98491	0.99293	0.99871	0.99962	0.99992	0.98649	0.99996	0.9967	0.99999	0.99999	0.99962	0.99844	0.99992	0.99624	0.99992	0.99975
0.95124	0.89015	0.98986	0.9861	0.99567	0.99963	0.99991	0.99143	0.99999	0.99097	1	1	0.99963	0.99853	0.99995	0.99626	0.99989	0.99974
0.93344	0.86692	0.99913	0.99782	0.99638	0.99885	0.99997	0.99911	0.99996	0.99869	0.99993	0.99993	0.99739	0.99704	1	0.99411	0.99967	0.90499
0.96653	0.90162	0.98062	0.98801	0.9964	0.99729	0.99858	0.98192	0.99948	0.99246	0.99913	0.99914	0.99725	0.99556	0.9989	0.98869	0.99855	0.96404
0.99725	0.97283	0.93121	0.99203	0.9965	0.98613	0.9939	0.93687	0.99609	0.99639	0.99203	0.99504	0.98634	0.99504	0.99532	0.95182	0.99587	0.99333
0.9896	0.94088	0.95912	0.99341	0.99741	0.99308	0.99564	0.96126	0.9972	0.99722	0.99705	0.99705	0.99268	0.99371	0.9962	0.97313	0.99636	0.99439
0.99518	0.97016	0.92015	0.9895	0.99287	0.98614	0.98975	0.93247	0.99252	0.99342	0.99139	0.9914	0.98476	0.991	0.9917	0.93753	0.99247	0.98966
0.97177	0.92771	0.92215	0.99733	0.98729	0.99543	0.9982	0.94643	0.99328	0.99733	0.99733	0.99733	0.99743	0.98641	0.99832	0.94241	0.99778	0.99966
0.98277	0.95702	0.89451	0.99376	0.97705	0.99059	0.99383	0.91285	0.98753	0.99376	0.99376	0.99376	0.99175	0.9961	0.99425	0.91637	0.99333	0.9982
0.94402	0.89796	0.97824	0.99627	0.9974	0.99875	0.9982	0.98799	0.99722	0.99627	0.99702	0.99702	0.99339	0.99982	0.9982	0.99002	0.9986	0.99895
0.98381	0.93372	0.97347	0.99008	0.99637	0.98791	0.99752	0.97491	0.99888	0.99498	0.99555	0.99556	0.98849	0.99533	0.99879	0.9883	0.99575	0.99162
0.98061	0.94142	0.95936	0.99799	0.99595	0.99931	0.99917	0.96671	0.9979	0.99813	0.99843	0.99843	0.99953	0.98153	0.99917	0.97629	0.99914	0.99966
0.9911	0.95759	0.941	0.99975	0.99429	0.99795	0.99917	0.94732	0.99767	0.99995	0.9998	0.9998	0.99811	0.99113	0.9993	0.95969	0.99994	0.99984
0.98705	0.94532	0.96045	0.9905	0.99735	0.99865	0.99902	0.97148	0.99788	0.99624	0.99907	0.99907	0.99861	0.99992	0.99902	0.97882	0.99948	0.99989
0.97621	0.92817	0.9806	0.98852	0.99544	0.99958	0.99746	0.98506	0.99649	0.99557	0.99783	0.99783	0.99957	0.99978	0.99746	0.98834	0.99823	0.99958
0.99091	0.96516	0.9501	0.9791	0.99475	0.97663	0.9937	0.94885	0.99578	0.99404	0.99153	0.99155	0.97864	0.99499	0.99672	0.96092	0.99427	0.99114
0.9368	0.88462	0.9997	0.98954	0.99274	0.99138	1	0.99973	0.99971	0.99368	0.99496	0.99499	0.98736	0.99821	1	0.99949	0.99563	0.99477
0.98921	0.96241	0.95333	0.98896	0.98963	0.99606	0.99313	0.97047	0.99124	0.98984	0.99128	0.99127	0.99588	0.99701	0.99313	0.97787	0.99345	0.99588
0.97936	0.9361	0.95882	0.99105	0.99439	0.99917	0.99696	0.97521	0.99506	0.99407	0.99658	0.99657	0.99917	0.99914	0.99696	0.97819	0.99769	0.99943
0.99482	0.95511	0.95914	0.98599	0.99824	0.98961	0.99812	0.9598	0.9993	0.99791	0.9977	0.9977	0.99052	0.99813	0.99896	0.97425	0.99839	0.99631
0.99659	0.97646	0.92811	0.99274	0.99682	0.99496	0.99767	0.94343	0.99782	0.99788	0.99838	0.99838	0.99489	0.99923	0.99741	0.95033	0.99881	0.99978
0.99424	0.96411	0.94404	0.99249	0.99772	0.99705	0.99886	0.95776	0.99841	0.9974	0.99905	0.99905	0.99702	0.99977	0.99886	0.96568	0.99933	0.99991
0.99256	0.96723	0.93088	0.99149	0.99434	0.99651	0.99639	0.95096	0.99569	0.99554	0.99655	0.99655	0.99636	0.99802	0.99639	0.95518	0.99695	0.99889
0.99167	0.99343	0.89163	0.9872	0.99296	0.98144	0.98959	0.90075	0.99326	0.99804	0.9872	0.9872	0.98071	0.99875	0.99198	0.90997	0.99882	0.99913
0.96899	0.91566	0.97119	0.99346	0.99488	0.99971	0.99737	0.98375	0.99537	0.99482	0.99733	0.99733	0.99478	0.99957	0.99738	0.98504	0.99845	0.99976
0.99628	0.97384	0.92905	0.99411	0.99685	0.99599	0.99804	0.94701	0.99799	0.99788	0.99849	0.99849	0.99593	0.99939	0.99804	0.95296	0.99887	0.99983
0.99506	0.97583	0.93111	0.99184	0.99556	0.99517	0.99499	0.95114	0.99601	0.99572	0.99565	0.99564	0.99518	0.99644	0.99499	0.95535	0.99551	0.99701
0.98388	0.98959	0.85236	0.99013	0.97656	0.9831	0.98663	0.90395	0.98606	0.99013	0.98987	0.98987	0.98367	0.99667	0.98765	0.90954	0.99058	0.99668
0.99626	0.98728	0.91183	0.99151	0.99467	0.99146	0.99364	0.93314	0.99553	0.99531	0.99448	0.99448	0.99141	0.99209	0.99364	0.93577	0.99522	0.9963
0.99631	0.97135	0.94531	0.98576	0.999	0.99073	0.99798	0.94906	0.99924	0.99785	0.99827	0.99827	0.99107	0.99852	0.99882	0.9608	0.99888	0.99736
0.98723	0.99362	0.87136	0.98838	0.98132	0.98269	0.98624	0.91127	0.98747	0.98838	0.98838	0.98838	0.98295	0.99187	0.98674	0.92008	0.9895	0.99237
0.98289	0.98056	0.88536	0.98716	0.97412	0.98754	0.9874	0.93294	0.98099	0.98716	0.98716	0.98716	0.98791	0.98927	0.98724	0.94119	0.98744	0.98985
0.98023	0.97852	0.88566	0.98493	0.97109	0.9863	0.98528	0.9356	0.97901	0.98493	0.98493	0.98493	0.98612	0.9869	0.9851	0.9433	0.98532	0.98754
0.95189	0.98942	0.79108	0.96963	0.95688	0.95263	0.96223	0.80447	0.9659	0.97442	0.96865	0.96865	0.9522	0.98691	0.96713	0.80184	0.97658	0.98175
0.93056	0.9535	0.90689	0.93348	0.97029	0.92404	0.96781	0.89929	0.97282	0.97888	0.9564	0.9565	0.92179	0.99516	0.98533	0.90833	0.9945	0.9675
0.98256	0.97887	0.88898	0.9867	0.97304	0.98777	0.98686	0.93708	0.98133	0.9867	0.9867	0.9867	0.9877	0.98794	0.98668	0.94485	0.98706	0.98908
0.97064	0.97938	0.84509	0.98002	0.96098	0.9783	0.98219	0.91121	0.97045	0.98002	0.98002	0.98002	0.98018	0.98877	0.98262	0.91641	0.97518	0.98864
0.95898	0.98221	0.87828	0.96223	0.98222	0.9492	0.97233	0.87559	0.97929	0.98711	0.97232	0.97236	0.94716	0.99726	0.98226	0.88378	0.99531	0.98329
0.97943	0.98631	0.85378	0.98539	0.97006	0.98127	0.9847	0.90856	0.97843	0.98539	0.98539	0.98539	0.98228	0.9928	0.98535	0.91589	0.9848	0.99237
0.98663	0.98689	0.90085	0.98397	0.9829	0.98511	0.98338	0.93332	0.98389	0.98397	0.98397	0.98397	0.98472	0.98407	0.983	0.9408	0.98429	0.98645
0.96336	0.98627	0.81123	0.97586	0.95928	0.96763	0.97234	0.87534	0.97137	0.97586	0.97586	0.97586	0.96874	0.98732	0.97396	0.87978	0.97712	0.98698
0.96174	0.98275	0.88363	0.96636	0.98247	0.94908	0.97217	0.87377	0.97942	0.98683	0.97263	0.97266	0.94666	0.99769	0.98147	0.88887	0.99515	0.98348
0.99231	0.98655	0.93705	0.97798	0.99426	0.98476	0.99395	0.94336	0.99586	0.99866	0.99524	0.99525	0.98433	0.99706	0.99395	0.95662	0.99826	0.99948
0.99452	0.99279	0.90509	0.98829	0.99553	0.98265	0.99209	0.91123	0.99534	0.99919	0.99452	0.99453	0.98263	0.99956	0.99411	0.92094	0.9996	0.99928
0.96941	0.98996	0.92692	0.97269	0.98755	0.95033	0.98012	0.92019	0.98609	0.98724	0.97655	0.97659	0.94964	0.99835	0.98659	0.93978	0.99729	0.98488
0.96937	0.99525	0.83295	0.9781	0.97643	0.96418	0.9752	0.8492	0.97972	0.98713	0.97963	0.97964	0.96305	0.99398	0.97939	0.8513	0.98954	0.99007
0.99491	0.97267	0.99513	0.99192	0.9959	0.9932	0.99919	0.9948	0.99707	0.98673	0.98862	0.99192	0.98822	0.99805	0.99919	0.99765	0.991	0.98886
0.9896	0.99114	0.87811	0.99168	0.99055	0.98345	0.99072	0.89403	0.99332	0.99642	0.99355	0.99355	0.98237	0.99688	0.99072	0.90672	0.99693	0.9978
0.98549	0.99557	0.86659	0.98785	0.98201	0.97999	0.98539	0.9052	0.98833	0.98785	0.98785	0.98785	0.98003	0.99238	0.98659	0.91366	0.99142	0.99223
0.89895	0.90278	0.93247	0.89466	0.95119	0.90094	0.97427	0.93011	0.97056	0.9704	0.94221	0.94245	0.9096	0.99434	0.9922	0.93823	0.99134	0.95636
0.95035	0.8745	0.99073	0.98808	0.99561	0.99932	0.99963	0.99287	0.99991	0.99063	0.99983	0.99983	0.96967	0.88629	0.9997	0.99226	0.99964	0.99949
0.96506	0.90384	0.9647	0.99639	0.99486	0.99657	0.99696	0.97541	0.99679	0.99663	0.99662	0.99662	0.99688	0.96943	0.99689	0.97262	0.99674	0.99683
0.91167	0.78961	0.99975	0.99997	0.99992	0.99997	1	0.9998	1	0.99998	1	1	0.99999	0.81349	1	0.99978	0.99993	1
0.8985	0.7857	0.99791	0.99947	0.99975	0.99989	0.99993	0.99861	0.99987	0.9995	0.99987	0.99987	0.99994	0.99382	0.99993	0.99843	0.99994	0.99995
0.97288	0.90731	0.98168	0.98641	0.99638	0.99774	0.99907	0.983	0.99979	0.99078	0.99948	0.99948	0.99772	0.99623	0.99943	0.98718	0.99895	0.9982
0.95945	0.90207	0.99244	0.98002	0.9933	0.99876	0.99983	0.99255	0.99997	0.98872	0.99993	0.99993	0.99873	0.99701	0.99982	0.99869	0.99961	0.99906
0.93529	0.85556	0.99476	0.99243	0.99701	0.99998	0.99998	0.99654	0.9999	0.99396	0.99993	0.99993	0.97973	0.86797	0.99998	0.99566	0.99999	0.99999
0.92052	0.82987	0.99732	0.99519	0.99769	0.99996	0.99993	0.99827	0.99983	0.99606	0.99986	0.99986	0.9883	0.84353	0.99993	0.99775	0.99995	0.99996
0.94198	0.86481	0.99339	0.99104	0.99662	0.99996	0.99999	0.99551	0.99992	0.99287	0.99996	0.99996	0.99997	0.87688	0.99999	0.99453	0.99999	0.99998
0.95708	0.8841	0.98724	0.99196	0.99791	0.99982	0.99993	0.99078	0.99985	0.99363	0.99992	0.99992	0.97551	0.89564	0.99993	0.98946	0.99995	0.99991
0.93802	0.87811	0.99892	0.99359	0.99136	0.9997	0.99992	0.99894	0.99957	0.99637	0.99994	0.99994	0.99969	0.99822	0.99992	0.99575	0.99997	0.9998
0.96191	0.88597	0.98971	0.98904	0.9926	0.9874	0.99683	0.98932	0.99828	0.99422	0.99398	0.994	0.98976	0.99311	0.99683	0.99943	0.99498	0.99202
0.96105	0.90178	0.99072	0.98126	0.99391	0.99945	0.99994	0.99145	0.9999	0.98689	0.99999	0.99999	0.99944	0.99813	0.99997	0.99642	0.99987	0.94835
0.95771	0.90006	0.99562	0.97599	0.99061	0.99888	0.99995	0.99567	0.99967	0.98829	0.99998	0.99998	0.99886	0.99726	0.99995	0.99911	0.99977	0.99919
0.93527	0.86589	0.99896	0.99506	0.99329	0.99849	0.99985	0.99924	0.99938	0.99695	0.99994	0.99994	0.99508	0.99761	0.99985	0.99541	0.9997	0.99886
0.937	0.866	0.99746	0.99772	0.99479	0.99878	0.99976	0.99821	0.99923	0.99804	0.99978	0.99978	0.99791	0.99815	0.99976	0.99531	0.99954	0.99831
0.94941	0.89423	0.99559	0.97463	0.98936	0.99991	0.99992	0.996	0.99954	0.98466	0.99982	0.99982	0.96158	0.99901	0.99992	0.9993	0.99998	0.99995
0.94577	0.88956	0.99592	0.97479	0.9893	0.9997	0.99998	0.9962	0.99994	0.98597	1	1	0.96813	0.99846	0.99998	0.99972	0.99993	0.99979
0.93022	0.87892	0.99842	0.98207	0.98794	0.99994	0.99999	0.99851	0.99988	0.99348	0.99995	0.99995	0.98868	0.99902	0.99999	0.99991	1	0.99996
0.92835	0.87302	0.99917	0.99487	0.99089	0.99985	0.99999	0.99918	0.99989	0.99637	0.99998	0.99998	0.99384	0.99861	0.99999	0.99991	0.99998	0.9999
0.93801	0.88266	0.99823	0.98134	0.98862	0.99959	0.99999	0.99825	0.99992	0.99378	1	1	0.98812	0.89062	0.99999	0.99875	0.9999	0.99971
0.96006	0.88828	0.98886	0.98691	0.99574	0.99943	0.99981	0.99101	1	0.9897	0.99996	0.99996	0.96601	0.99834	0.9999	0.99103	0.99978	0.99959
0.95768	0.90089	0.99454	0.9736	0.98982	0.99941	0.99997	0.99481	0.9998	0.98188	0.99999	0.99999	0.9994	0.99795	0.99997	0.99864	0.99987	0.99959
0.92748	0.85514	0.99912	0.99594	0.99303	0.99922	0.99942	0.99938	0.99895	0.99744	0.99999	0.99999	0.99575	0.99848	0.99942	0.9993	0.99992	0.99944
0.94386	0.88932	0.99762	0.96861	0.98577	0.99947	0.99998	0.9977	0.99994	0.98293	1	1	0.96393	0.99792	0.99998	0.99989	0.99985	0.99962
0.9596	0.93999	0.89065	0.97984	0.95085	0.97934	0.98702	0.93164	0.97375	0.97984	0.97984	0.97984	0.9865	0.94765	0.98737	0.92457	0.98032	0.99113
0.90164	0.78997	0.99657	0.99988	0.99997	0.99983	0.99997	0.99752	0.99998	0.99991	0.99997	0.99997	0.99996	0.80802	0.99997	0.99724	0.99981	0.99998
0.95399	0.93496	0.88245	0.97628	0.94551	0.97782	0.98657	0.92717	0.96907	0.97628	0.97628	0.97628	0.98613	0.94281	0.98681	0.9207	0.97814	0.99014
0.91446	0.81469	0.9968	0.99796	0.99913	0.99995	0.99996	0.99791	0.99988	0.99833	0.99989	0.99989	0.99997	0.82979	0.99996	0.94419	0.99997	0.99997
0.90397	0.80089	0.9983	0.99764	0.99868	0.99996	0.99997	0.99877	1	0.99813	0.99999	0.99999	0.99996	0.81627	0.99997	0.99849	0.99998	0.99997
0.89866	0.78347	0.99792	0.99954	0.99976	0.9999	0.99994	0.99848	0.99998	0.99953	0.99998	0.99998	0.99992	0.89815	0.99995	0.99824	0.99995	0.99994
0.94173	0.85532	0.99142	0.99532	0.99861	0.99989	0.99997	0.9943	0.99998	0.99624	0.99999	0.99999	0.98383	0.86839	0.99998	0.99274	0.99997	0.99993

## Sheet: RMSE
Data for PM
JAKY1	LOGL2	LOGI2	LOGN2	VANH2	VANZ2	FRED3	LOGI3	MLOG3	ONLG3	ORLG3	SHCA3	VANZ3	ANDE4	FRED4	GOMP4	LOGI4	VANG4
0.07978	0.13496	0.05784	0.02384	0.01193	0.0069	0.00949	0.04744	0.0126	0.02287	0.01328	0.01328	0.04481	0.05669	0.00949	0.03649	0.00885	0.00633
0.09383	0.14989	0.05105	0.02418	0.01044	0.00654	0.00872	0.04025	0.01196	0.02334	0.01223	0.01223	0.00615	0.00557	0.00872	0.03339	0.00792	0.00619
0.04285	0.09228	0.08438	0.01401	0.02499	0.01282	0.01082	0.06445	0.01687	0.01357	0.01278	0.01278	0.0117	0.03615	0.01082	0.05475	0.01057	0.00686
0.09759	0.14909	0.03855	0.04084	0.02358	0.00522	0.01157	0.03209	0.01786	0.03617	0.01516	0.01516	0.04201	0.00428	0.01157	0.01517	0.00725	0.00441
0.09101	0.14336	0.04721	0.03638	0.02121	0.01084	0.01595	0.03627	0.02117	0.03555	0.02013	0.02013	0.04641	0.00131	0.01595	0.02282	0.01137	0.00902
0.10767	0.15748	0.03441	0.03919	0.02812	0.01016	0.01596	0.02725	0.02183	0.03809	0.01917	0.01918	0.01029	0.00165	0.01595	0.01458	0.01017	0.00804
0.08656	0.13592	0.05267	0.03539	0.02345	0.01269	0.01924	0.04045	0.02443	0.03495	0.02421	0.02421	0.03596	0.00329	0.01923	0.02486	0.01461	0.01116
0.09737	0.14378	0.04763	0.0186	0.01613	0.018	0.01196	0.03944	0.01443	0.01439	0.00969	0.0097	0.01841	0.01763	0.01196	0.03492	0.01026	0.01366
0.11947	0.16574	0.03438	0.0217	0.01486	0.02459	0.00621	0.02917	0.00645	0.0149	0.01289	0.01286	0.03311	0.01382	0.00621	0.0216	0.01133	0.01874
0.13837	0.18232	0.02093	0.02863	0.01888	0.01695	0.00745	0.0208	0.00628	0.01933	0.01217	0.01212	0.03093	0.01412	0.00744	0.01539	0.00919	0.01211
0.0674	0.12301	0.06226	0.02349	0.00356	0.01523	0.008	0.05698	0.00272	0.01632	0.00338	0.00338	0.01533	0.01535	0.00641	0.04145	0.00654	0.0112
0.04653	0.09564	0.07181	0.04668	0.03211	0.04807	0.03341	0.07034	0.02722	0.03386	0.03421	0.03419	0.04894	0.03634	0.02848	0.06007	0.03276	0.03989
0.04233	0.0859	0.05822	0.05011	0.03432	0.05303	0.02916	0.05662	0.02513	0.03578	0.03761	0.03758	0.05032	0.03356	0.02918	0.0388	0.03469	0.04167
0.04359	0.08531	0.07548	0.05286	0.03811	0.057	0.0412	0.07666	0.03578	0.03997	0.0428	0.04278	0.05724	0.0416	0.03671	0.06261	0.04044	0.04709
0.06721	0.12167	0.08347	0.0125	0.03022	0.01899	0.01142	0.06221	0.02225	0.0125	0.0125	0.0125	0.01368	0.04116	0.01109	0.06375	0.01141	0.0076
0.05012	0.10072	0.09561	0.01764	0.03835	0.024	0.01651	0.0735	0.02758	0.01764	0.01764	0.01764	0.01921	0.02803	0.01604	0.07339	0.01757	0.00929
0.07895	0.13576	0.06907	0.01038	0.02287	0.01759	0.01127	0.05094	0.01689	0.01038	0.01038	0.01038	0.02256	0.01833	0.01107	0.05175	0.0119	0.00897
0.03589	0.08883	0.08017	0.03533	0.02587	0.04048	0.03123	0.07403	0.02639	0.02685	0.02824	0.02823	0.04121	0.03118	0.02776	0.07343	0.02774	0.03264
0.03655	0.08573	0.06813	0.03847	0.01755	0.03815	0.02088	0.06053	0.01568	0.02524	0.02294	0.02292	0.03833	0.02341	0.01582	0.04893	0.02209	0.02991
0.08182	0.13402	0.04668	0.03653	0.01625	0.00405	0.00704	0.03997	0.01353	0.02874	0.01046	0.01047	0.04215	0.00801	0.00703	0.02364	0.00484	0.00194
0.08553	0.1325	0.0371	0.04053	0.02864	0.038	0.00811	0.0335	0.00876	0.03068	0.02538	0.02534	0.05308	0.01778	0.00343	0.00925	0.02296	0.03121
0.12384	0.16973	0.02136	0.03749	0.02792	0.03448	0.00404	0.02021	0.00171	0.02823	0.02391	0.03749	0.04747	0.01501	0.00404	0.00952	0.02045	0.02609
0.13666	0.18126	0.02459	0.02698	0.01763	0.01874	0.00668	0.02302	0.00708	0.01876	0.01278	0.01273	0.0316	0.01149	0.00668	0.01937	0.00952	0.01336
0.13485	0.17963	0.02281	0.03004	0.02	0.02288	0.00519	0.02151	0.00459	0.02153	0.01591	0.01586	0.03526	0.01148	0.00518	0.01601	0.01244	0.01641
0.10158	0.15447	0.05678	0.02228	0.01808	0.01266	0.01506	0.03709	0.01959	0.02228	0.0196	0.0196	0.03071	0.00436	0.01506	0.03296	0.01221	0.01058
0.08584	0.14154	0.06385	0.01018	0.01237	0.00669	0.00459	0.04809	0.00998	0.01033	0.00771	0.00771	0.03333	0.03775	0.00459	0.04582	0.00466	0.00294
0.08373	0.13559	0.04612	0.03117	0.01306	0.01526	0.0054	0.04197	0.00463	0.02048	0.00199	0.00199	0.01554	0.01672	0.00393	0.02421	0.00533	0.01139
0.06523	0.11086	0.06369	0.02582	0.01411	0.01119	0.00703	0.04437	0.01321	0.02047	0.00985	0.00986	0.02888	0.00557	0.00702	0.03727	0.00546	0.00813
0.07335	0.12473	0.05013	0.03236	0.01153	0.01269	0.00256	0.04275	0.00722	0.02319	0.00468	0.00469	0.01291	0.01353	0.00256	0.02659	0.00419	0.07917
0.07505	0.12467	0.05295	0.03295	0.01743	0.00355	0.01101	0.04196	0.01752	0.02833	0.01531	0.01532	0.0366	0.00329	0.011	0.02734	0.00812	0.00282
0.03199	0.04871	0.0842	0.04295	0.0287	0.05225	0.03636	0.07984	0.03071	0.02977	0.03552	0.0355	0.05276	0.02917	0.03062	0.07176	0.02951	0.0345
0.10297	0.14163	0.01583	0.05844	0.04953	0.05584	0.00957	0.01547	0.01567	0.04161	0.03941	0.03934	0.06631	0.02889	0.00959	0.00794	0.03684	0.04172
0.08837	0.12098	0.01994	0.0695	0.057	0.06122	0.01103	0.02007	0.02039	0.05024	0.04232	0.0422	0.07434	0.023	0.01105	0.01329	0.0394	0.04208
0.07923	0.11651	0.0215	0.06183	0.04799	0.05517	0.01038	0.02143	0.01596	0.04451	0.03913	0.03904	0.06834	0.02542	0.0104	0.01042	0.03644	0.04198
0.09896	0.13041	0.01108	0.05101	0.04058	0.04331	0.00413	0.01098	0.00901	0.035	0.02918	0.0291	0.05358	0.01187	0.00414	0.00882	0.02658	0.02883
0.09099	0.12725	0.01784	0.04748	0.03738	0.04678	0.00748	0.0171	0.01102	0.03431	0.03165	0.03158	0.05418	0.01945	0.00447	0.01409	0.02933	0.03443
0.07315	0.11596	0.03106	0.05658	0.04287	0.05506	0.0175	0.03057	0.01846	0.04357	0.03965	0.03957	0.04679	0.03193	0.01752	0.01203	0.03687	0.04344
0.02565	0.07941	0.08337	0.02557	0.01285	0.0272	0.01738	0.07009	0.01217	0.01418	0.01341	0.0134	0.0277	0.01714	0.01481	0.06261	0.013	0.01817
0.03646	0.08498	0.06678	0.03563	0.01131	0.02864	0.01011	0.05936	0.00328	0.01859	0.01201	0.01199	0.02846	0.01323	0.01012	0.04402	0.01119	0.01986
0.04805	0.0954	0.07022	0.02979	0.01256	0.01872	0.00854	0.05911	0.0095	0.01763	0.00498	0.00498	0.01879	0.01045	0.00855	0.04616	0.00615	0.01148
0.04794	0.03756	0.10213	0.02345	0.03154	0.02567	0.02196	0.08163	0.02579	0.02116	0.02087	0.02088	0.02606	0.02354	0.02196	0.07602	0.0217	0.01563
0.10378	0.15022	0.03102	0.03501	0.02686	0.03559	0.01866	0.03232	0.01163	0.02443	0.02446	0.02441	0.04444	0.02873	0.01866	0.00596	0.02203	0.02752
0.12497	0.17025	0.02375	0.03346	0.02241	0.02706	0.00751	0.02395	0.00317	0.02369	0.03346	0.01924	0.03905	0.01642	0.00751	0.00943	0.01566	0.01992
0.1157	0.16181	0.0238	0.02797	0.02349	0.0273	0.00345	0.02032	0.0051	0.0194	0.01405	0.01402	0.03972	0.01713	0.00345	0.02006	0.01385	0.02179
0.04265	0.09055	0.06891	0.03064	0.0084	0.0223	0.00567	0.05837	0.00284	0.01663	0.00573	0.00571	0.02223	0.00876	0.00568	0.04378	0.00559	0.0145
0.041	0.09242	0.09057	0.00781	0.02965	0.01886	0.01218	0.07187	0.01866	0.00764	0.00781	0.00781	0.0162	0.02251	0.01139	0.06754	0.00813	0.00513
0.05041	0.08895	0.04415	0.05131	0.03844	0.05627	0.02434	0.04418	0.02333	0.05131	0.04234	0.04229	0.05098	0.03138	0.02435	0.01867	0.03865	0.04564
0.06915	0.10245	0.02505	0.06024	0.04659	0.05765	0.01341	0.02594	0.01894	0.04658	0.0425	0.04242	0.06793	0.02302	0.00889	0.01079	0.03883	0.04401
0.06223	0.1104	0.05094	0.03843	0.02658	0.03833	0.02041	0.04467	0.01849	0.03602	0.02817	0.02814	0.03586	0.02992	0.02042	0.0149	0.02777	0.03561
0.09496	0.14309	0.03665	0.0346	0.02453	0.03373	0.00815	0.03549	0.00284	0.02474	0.02091	0.02087	0.04715	0.01833	0.00815	0.00678	0.01854	0.02684
0.02265	0.06539	0.0994	0.01612	0.02398	0.01897	0.01456	0.07214	0.01611	0.01195	0.01218	0.01218	0.01907	0.03737	0.01443	0.06412	0.01039	0.00657
0.05245	0.09791	0.08122	0.02808	0.02486	0.01184	0.01759	0.05479	0.02243	0.027	0.02147	0.02148	0.01154	0.00955	0.01759	0.04597	0.01697	0.01096
0.07547	0.1225	0.06338	0.03104	0.02506	0.01315	0.01974	0.04776	0.02541	0.03092	0.0256	0.02561	0.03073	0.00583	0.01974	0.03191	0.01657	0.01224
0.11727	0.1657	0.02772	0.02172	0.01876	0.0065	0.00552	0.02576	0.01224	0.02048	0.0077	0.00771	0.02214	0.01378	0.00552	0.02301	0.00364	0.00439
0.12277	0.16894	0.02123	0.02124	0.02052	0.00713	0.00661	0.01914	0.01381	0.02013	0.00702	0.00703	0.02248	0.01414	0.00661	0.03139	0.0031	0.00486
0.10067	0.14847	0.03706	0.02251	0.01517	0.00669	0.0044	0.0316	0.01225	0.02045	0.00793	0.00794	0.02247	0.0123	0.00439	0.01925	0.00183	0.00542
0.10379	0.15566	0.05252	0.02964	0.01981	0.01504	0.01834	0.03588	0.02182	0.02979	0.0229	0.0229	0.03138	0.1759	0.01833	0.02609	0.01374	0.01219
0.0863	0.13439	0.05056	0.02836	0.01822	0.005	0.01242	0.04037	0.01876	0.02732	0.0177	0.0177	0.02663	0.00401	0.01242	0.02362	0.00912	0.00478
0.10857	0.15666	0.02929	0.02629	0.02158	0.00437	0.00686	0.02536	0.01477	0.02457	0.00885	0.00886	0.02639	0.01182	0.00685	0.02159	0.00263	0.00284
0.13726	0.18224	0.02153	0.01834	0.01379	0.01758	0.00595	0.01675	0.00996	0.01261	0.00819	0.00816	0.02744	0.00875	0.00595	0.01711	0.00732	0.01316
0.04836	0.10029	0.07995	0.01153	0.022	0.01089	0.008	0.06233	0.014	0.01111	0.01004	0.01004	0.00923	0.03522	0.00835	0.0534	0.00755	0.00405
0.06401	0.11696	0.06228	0.02499	0.01036	0.00519	0.0059	0.05127	0.01038	0.02096	0.01034	0.01035	0.00462	0.00423	0.00589	0.03712	0.00512	0.00072
0.05484	0.10672	0.07699	0.01454	0.02275	0.01048	0.01002	0.05888	0.01617	0.01448	0.01345	0.01345	0.00852	0.0378	0.01002	0.05035	0.01017	0.00673
0.07264	0.12572	0.08549	0.01998	0.035	0.02218	0.01671	0.06168	0.02835	0.01998	0.01998	0.01998	0.01769	0.04281	0.01664	0.06263	0.01818	0.01422
0.02635	0.07533	0.08652	0.02077	0.01085	0.0195	0.00989	0.06698	0.00625	0.00973	0.00511	0.00511	0.01982	0.0064	0.00887	0.06275	0.00329	0.00796
0.05859	0.11232	0.08675	0.01174	0.03121	0.01945	0.01197	0.06711	0.02202	0.01174	0.01174	0.01174	0.01477	0.03491	0.01154	0.06765	0.01135	0.00718
0.04933	0.10247	0.07522	0.01416	0.02064	0.01041	0.00933	0.05731	0.01357	0.01384	0.01223	0.01223	0.00849	0.03584	0.00933	0.05044	0.00931	0.00594
0.0709	0.1217	0.0672	0.02667	0.02412	0.01396	0.01829	0.05008	0.02285	0.02691	0.02308	0.02309	0.0399	0.05292	0.01828	0.03888	0.01656	0.01315
0.09007	0.1409	0.06007	0.03051	0.02419	0.01668	0.02083	0.04298	0.02522	0.03068	0.02595	0.02595	0.0166	0.06309	0.02083	0.03146	0.01699	0.01459
0.0885	0.14141	0.06137	0.023	0.01992	0.01311	0.01589	0.04175	0.02047	0.02303	0.02054	0.02055	0.03521	0.00513	0.01589	0.03662	0.01328	0.01121
0.06691	0.11603	0.05594	0.04725	0.03503	0.05041	0.02812	0.05635	0.02253	0.03421	0.03528	0.03525	0.0496	0.03547	0.02325	0.03543	0.03315	0.04211
0.06298	0.11042	0.0408	0.04487	0.03157	0.04591	0.01692	0.03939	0.0127	0.03301	0.03185	0.0318	0.04026	0.02682	0.01694	0.0137	0.02852	0.03631
0.10627	0.15381	0.02989	0.03916	0.02809	0.03719	0.01127	0.03072	0.00668	0.02882	0.02604	0.02599	0.04971	0.02116	0.01128	0.01123	0.02238	0.02877
0.0921	0.14261	0.04021	0.028	0.01682	0.01935	0.00853	0.03738	0.00651	0.01798	0.00618	0.00617	0.01964	0.0194	0.00721	0.02412	0.00828	0.01467
0.06	0.10483	0.07794	0.02735	0.0302	0.01517	0.02009	0.05775	0.02736	0.02729	0.02525	0.02525	0.01482	0.01139	0.02009	0.04435	0.01989	0.01481
0.06911	0.12043	0.06458	0.02522	0.01828	0.00873	0.01313	0.05145	0.01729	0.02483	0.01771	0.01772	0.00828	0.05916	0.01312	0.03722	0.0122	0.00826
0.03524	0.08249	0.06433	0.03326	0.02022	0.03982	0.02149	0.06063	0.01549	0.03326	0.02401	0.02399	0.0382	0.02287	0.0215	0.04021	0.02219	0.02897
0.06848	0.09425	0.02407	0.02647	0.01658	0.02059	0.00496	0.02386	0.00612	0.01772	0.01441	0.01437	0.02607	0.01047	0.00496	0.01433	0.01072	0.01296
0.0366	0.05795	0.01603	0.02411	0.01504	0.01986	0.00382	0.01627	0.00148	0.01448	0.01294	0.01291	0.02487	0.00826	0.16596	0.00404	0.009	0.01034
0.06754	0.08695	0.01151	0.02734	0.01869	0.01951	0.00126	0.01165	0.00207	0.01806	0.01412	0.01409	0.02522	0.00666	0.00126	0.0042	0.01138	0.01247
0.09172	0.13465	0.05298	0.02514	0.02334	0.00333	0.0154	0.03541	0.02351	0.02519	0.01775	0.01776	0.02186	0.00331	0.0154	0.03622	0.01085	0.00313
0.137	0.17982	0.02222	0.01277	0.01336	0.00803	0.00887	0.01742	0.01519	0.01222	0.00589	0.0059	0.01669	0.00973	0.00887	0.01711	0.00346	0.00557
0.11984	0.16495	0.0232	0.02098	0.02085	0.01009	0.00761	0.01964	0.01494	0.01847	0.00559	0.0056	0.02394	0.01415	0.00761	0.03265	0.00338	0.00714
0.12613	0.17018	0.0233	0.01811	0.01727	0.00685	0.00916	0.01995	0.01634	0.01791	0.00964	0.00964	0.01819	0.01242	0.00915	0.03728	0.00524	0.00481
0.07153	0.12388	0.0705	0.01895	0.02224	0.01112	0.01331	0.05187	0.01921	0.01895	0.01779	0.01779	0.00975	0.04773	0.01331	0.04439	0.01259	0.00971
0.0498	0.10188	0.07043	0.0224	0.01173	0.00904	0.00575	0.05661	0.00849	0.01667	0.00825	0.00826	0.00878	0.00438	0.00575	0.04452	0.00498	0.00198
0.03217	0.07618	0.06465	0.0438	0.0189	0.0363	0.01621	0.05652	0.01315	0.02571	0.02139	0.02137	0.03579	0.01799	0.01081	0.04471	0.01952	0.02719
0.01915	0.06323	0.09429	0.01729	0.02069	0.01904	0.01295	0.06849	0.01242	0.01072	0.01031	0.01031	0.01916	0.03502	0.01231	0.06118	0.00831	0.00463
0.07373	0.12749	0.06736	0.01687	0.01683	0.00765	0.0094	0.05188	0.01443	0.01705	0.01395	0.01395	0.03717	0.04937	0.0094	0.04342	0.00887	0.00594
0.06641	0.11658	0.07984	0.0184	0.03054	0.01446	0.01468	0.05692	0.02476	0.0184	0.0184	0.0184	0.02961	0.04151	0.01467	0.05108	0.01503	0.01216
0.06222	0.11495	0.0731	0.01352	0.01491	0.00818	0.00458	0.06104	0.01041	0.01199	0.00748	0.00749	0.00729	0.04761	0.00497	0.04709	0.00418	0.00197
0.07994	0.1326	0.05228	0.02999	0.0093	0.00676	0.00281	0.04616	0.00836	0.02256	0.00656	0.00657	0.03645	0.01023	0.00281	0.0275	0.0018	0.0039
0.08835	0.14078	0.04793	0.0301	0.01079	0.0093	0.00324	0.044	0.00696	0.02125	0.00456	0.00457	0.03193	0.01336	0.00325	0.02312	0.00272	0.00634
0.13317	0.17656	0.01107	0.03768	0.02717	0.02391	0.00639	0.01154	0.00251	0.02519	0.01749	0.03768	0.038	0.01853	0.00639	0.00274	0.01526	0.01737
0.09722	0.14473	0.03772	0.03517	0.02601	0.03881	0.01207	0.03498	0.00688	0.02554	0.024	0.03517	0.04921	0.02363	0.01208	0.01035	0.02259	0.03176
0.09891	0.14907	0.03646	0.02786	0.01675	0.01162	0.00108	0.03331	0.00712	0.02066	0.00197	0.00197	0.01183	0.01638	0.0006	0.01577	0.00334	0.09734
0.13919	0.18405	0.01794	0.02792	0.01989	0.02462	0.00318	0.01469	0.00482	0.02071	0.02792	0.01628	0.03556	0.00987	0.00318	0.02165	0.01374	0.01831
0.14154	0.18605	0.01489	0.033	0.02381	0.02759	0.00201	0.01274	0.00205	0.02504	0.01945	0.01939	0.03927	0.01057	0.00201	0.01657	0.01658	0.02027
0.15356	0.19667	0.00994	0.03387	0.02458	0.0193	0.0047	0.00936	0.00306	0.02429	0.01405	0.03387	0.03415	0.00761	0.00469	0.013	0.01193	0.01344
0.14878	0.19223	0.01048	0.03658	0.02642	0.02329	0.00321	0.01008	0.00097	0.0267	0.0169	0.01683	0.0376	0.00917	0.00321	0.01016	0.01446	0.01623
0.06413	0.11693	0.05637	0.03083	0.007	0.01454	0.00392	0.04857	0.00342	0.02113	0.002	0.002	0.01477	0.01351	0.0017	0.03379	0.0043	0.01046
0.09124	0.14358	0.03669	0.03753	0.0216	0.01995	0.00759	0.03485	0.00292	0.02413	0.00627	0.00626	0.02027	0.02146	0.0076	0.01786	0.00942	0.09427
0.08225	0.13238	0.04434	0.03185	0.01532	0.0123	0.00166	0.03818	0.00853	0.02202	0.00266	0.00267	0.0125	0.0135	0.00166	0.02536	0.00218	0.00898
0.10399	0.15328	0.03026	0.02726	0.02112	0.01607	0.00468	0.02817	0.00758	0.019	0.00307	0.00307	0.01626	0.0188	0.00468	0.01877	0.00601	0.01227
0.06182	0.11692	0.06605	0.01804	0.00923	0.00695	0.00356	0.05509	0.00651	0.01518	0.00726	0.00726	0.0059	0.04713	0.00356	0.04404	0.00345	0.00286
0.0769	0.13426	0.06908	0.00648	0.01822	0.01478	0.00987	0.05391	0.01214	0.00572	0.0065	0.0065	0.01207	0.04913	0.00953	0.05555	0.00694	0.0083
0.06811	0.12115	0.07792	0.01256	0.0283	0.01527	0.00724	0.05256	0.02111	0.01256	0.01256	0.01256	0.00778	0.04201	0.00718	0.05385	0.00814	0.00454
0.04618	0.09832	0.08113	0.00898	0.02102	0.01164	0.00718	0.06425	0.01252	0.00789	0.007	0.007	0.01016	0.03383	0.00702	0.05522	0.00465	0.00108
0.08757	0.13604	0.04433	0.03252	0.02043	0.00249	0.01186	0.03532	0.0193	0.02928	0.01549	0.0155	0.03173	0.00504	0.01186	0.02388	0.00779	0.0023
0.09388	0.1406	0.0382	0.02652	0.02012	0.01545	0.00263	0.02911	0.01058	0.0202	0.00289	0.0029	0.03091	0.01361	0.00262	0.02369	0.00445	0.01238
0.04927	0.10375	0.07226	0.01773	0.00963	0.01268	0.00581	0.06074	0.00349	0.01165	0.00258	0.00259	0.01246	0.04645	0.00482	0.04917	0.00237	0.00618
0.07232	0.12899	0.06401	0.01492	0.00942	0.00752	0.0045	0.0533	0.00614	0.01278	0.00645	0.00645	0.00631	0.04892	0.0045	0.04619	0.00414	0.00357
0.07617	0.1297	0.06531	0.01993	0.01787	0.00946	0.01221	0.04894	0.01681	0.0202	0.01679	0.01679	0.03815	0.05169	0.01221	0.04099	0.01109	0.0083
0.0707	0.1203	0.08606	0.02282	0.03908	0.02131	0.01163	0.05368	0.03174	0.02282	0.02282	0.02282	0.01574	0.04306	0.01155	0.05471	0.01672	0.00909
0.0401	0.09405	0.07834	0.01076	0.01928	0.01183	0.00768	0.06088	0.00963	0.00901	0.0075	0.0075	0.0102	0.03118	0.00744	0.05462	0.0054	0.00226
0.05695	0.10925	0.06177	0.0292	0.01496	0.00609	0.01073	0.04797	0.01543	0.02544	0.01463	0.01464	0.00552	7e-05	0.01072	0.03685	0.00914	0.00451
0.06958	0.12335	0.05925	0.02615	0.01495	0.00717	0.01178	0.04643	0.01592	0.02541	0.01622	0.01623	0.04803	0.05455	0.01177	0.03568	0.0099	0.00649
0.07445	0.12669	0.05547	0.03187	0.01871	0.00912	0.01504	0.04297	0.02002	0.031	0.01952	0.01953	0.00889	0.00187	0.01503	0.03044	0.01192	0.00842
0.06016	0.10953	0.07264	0.02678	0.02729	0.01581	0.01986	0.05315	0.0243	0.02691	0.02407	0.02408	0.04231	0.04899	0.01985	0.04324	0.01893	0.01517
0.07391	0.12755	0.06001	0.02475	0.01254	0.0055	0.00906	0.04951	0.01295	0.02327	0.01349	0.01349	0.00485	0.05829	0.00905	0.03561	0.00809	0.00468
0.0392	0.08946	0.07451	0.0263	0.00715	0.01932	0.00851	0.05776	0.00707	0.01711	0.00756	0.00755	0.0196	0.0111	0.00681	0.0472	0.00782	0.01295
0.11588	0.16247	0.02043	0.05284	0.04131	0.04673	0.00946	0.02059	0.01241	0.04067	0.03463	0.03454	0.06307	0.02147	0.00525	0.00605	0.03044	0.03531
0.13542	0.17903	0.01082	0.0416	0.03053	0.02838	0.0049	0.01133	0.00475	0.02923	0.02049	0.02042	0.04242	0.01643	0.0049	0.00028	0.01811	0.02012
0.14443	0.18698	0.00681	0.03583	0.02673	0.02033	0.00445	0.00705	0.00101	0.03583	0.01457	0.0145	0.03533	0.015	0.00445	0.00398	0.01281	0.0143
0.14877	0.19075	0.01023	0.03062	0.02199	0.02024	0.00393	0.01053	0.00115	0.02184	0.03062	0.01443	0.02992	0.014	0.00393	0.00498	0.01261	0.01411
0.05971	0.11385	0.05607	0.03394	0.01008	0.01967	0.0094	0.04941	0.00509	0.02377	0.00791	0.00791	0.05227	0.01804	0.00941	0.03601	0.01033	0.01583
0.06544	0.11724	0.04832	0.0409	0.01729	0.01955	0.00498	0.04064	0.00512	0.0272	0.00656	0.00655	0.01981	0.01665	0.00219	0.02926	0.00877	0.0157
0.11482	0.16096	0.02399	0.02166	0.02069	0.01756	0.0036	0.02091	0.00942	0.01588	0.0034	0.00339	0.02925	0.01759	0.0036	0.01712	0.0065	0.01364
0.14703	0.19049	0.01093	0.03664	0.02634	0.02328	0.00335	0.01071	0.00075	0.02659	0.01688	0.01682	0.03758	0.01004	0.00334	0.00912	0.01433	0.01616
0.14539	0.1884	0.01022	0.03436	0.02473	0.01959	0.00492	0.01037	0.00153	0.02377	0.01415	0.03436	0.03436	0.01315	0.00492	0.00769	0.01189	0.01366
0.04963	0.09877	0.07991	0.01927	0.02564	0.01248	0.0143	0.05973	0.02009	0.01914	0.01779	0.0178	0.01122	0.04105	0.0143	0.04979	0.01445	0.01045
0.07337	0.12431	0.05827	0.02994	0.01759	0.00714	0.0134	0.04625	0.01832	0.0285	0.01818	0.01819	0.04094	0.00184	0.0134	0.0313	0.01117	0.00684
0.07145	0.12361	0.06679	0.02332	0.02154	0.0122	0.01574	0.04938	0.02035	0.02349	0.02042	0.02042	0.03975	0.05037	0.01573	0.04034	0.01415	0.01111
0.04786	0.10249	0.07626	0.00972	0.01945	0.0111	0.00698	0.05964	0.01051	0.00897	0.0077	0.0077	0.00887	0.03357	0.00711	0.05406	0.0058	0.00348
0.07433	0.12991	0.0703	0.00502	0.01658	0.00935	0.00318	0.05339	0.01092	0.005	0.00457	0.00457	0.00505	0.00405	0.00318	0.05219	0.00203	0.00074
0.08765	0.14056	0.05245	0.03127	0.01694	0.00892	0.01356	0.04309	0.01809	0.03001	0.01786	0.01787	0.04144	0.00514	0.01356	0.02788	0.01156	0.00879
0.09705	0.15238	0.0571	0.00754	0.01417	0.00823	0.00442	0.0386	0.01261	0.00754	0.00754	0.00754	0.00321	0.05969	0.00441	0.03921	0.00445	0.00311
0.06286	0.11634	0.07648	0.00789	0.02125	0.01044	0.00551	0.05886	0.0147	0.00789	0.00789	0.00789	0.00692	0.03022	0.00567	0.05374	0.00592	0.00296
0.07926	0.13356	0.05951	0.02309	0.00833	0.00526	0.00536	0.05177	0.00873	0.02	0.00925	0.00925	0.00483	0.06033	0.00536	0.0357	0.00503	0.00285
0.09069	0.14298	0.05347	0.02883	0.01487	0.00685	0.01164	0.0437	0.01615	0.02796	0.01659	0.0166	0.03613	0.00189	0.01163	0.02642	0.0087	0.0059
0.05228	0.09983	0.0724	0.02763	0.01544	0.00844	0.00956	0.05129	0.01415	0.02225	0.01332	0.01333	0.00851	0.00315	0.00955	0.04205	0.00868	0.00443
0.10483	0.15375	0.02891	0.02688	0.02178	0.01698	0.0045	0.02685	0.00746	0.01897	0.00326	0.00326	0.01714	0.01912	0.0045	0.01933	0.00654	0.0131
0.08532	0.13675	0.05232	0.03076	0.01588	0.00513	0.01122	0.04331	0.01678	0.02873	0.01615	0.01616	0.03672	0.00279	0.01122	0.02527	0.00854	0.00477
0.09162	0.14313	0.05368	0.03157	0.01941	0.01177	0.01664	0.04184	0.02077	0.03141	0.02154	0.02154	0.01176	0.00352	0.01664	0.02638	0.01307	0.01041
0.09731	0.14693	0.04186	0.02763	0.01635	0.00145	0.00761	0.03608	0.01468	0.02542	0.01204	0.01205	0.02692	0.00834	0.0076	0.01793	0.0047	0.00017
0.12021	0.16608	0.02023	0.0205	0.01829	0.02376	0.00363	0.01898	0.00394	0.01418	0.00983	0.00982	0.03179	0.02067	0.0021	0.02354	0.01181	0.0194
0.07825	0.12884	0.05961	0.02464	0.01349	0.00409	0.00896	0.04939	0.01427	0.02308	0.01458	0.01459	0.03095	0.00391	0.00896	0.03048	0.00747	0.00366
0.08556	0.13595	0.04601	0.03519	0.01848	0.00263	0.01035	0.03773	0.01725	0.03039	0.01451	0.01451	0.03686	0.00537	0.01034	0.02115	0.00678	0.00246
0.10642	0.15558	0.03031	0.02723	0.02109	0.01114	0.00487	0.02794	0.01121	0.02089	0.00496	0.00497	0.01133	0.01592	0.00486	0.02026	0.00412	0.00793
0.1175	0.1659	0.03123	0.02475	0.02054	0.00647	0.01185	0.02822	0.01817	0.02484	0.01505	0.01505	0.02197	0.01022	0.01184	0.01711	0.00935	0.00675
0.04908	0.10066	0.07699	0.0152	0.01931	0.00956	0.00837	0.06019	0.01327	0.01441	0.01149	0.01149	0.00848	0.04184	0.00837	0.04951	0.00832	0.00415
0.06227	0.11484	0.07398	0.01477	0.02038	0.0089	0.00905	0.05768	0.01526	0.01478	0.01303	0.01303	0.00689	0.04216	0.00904	0.04803	0.00914	0.00575
0.06543	0.11711	0.07005	0.02064	0.01987	0.00921	0.01251	0.05436	0.01776	0.02077	0.01718	0.01719	0.03846	0.04893	0.0125	0.04247	0.01193	0.00821
0.04754	0.05579	0.1338	0.03351	0.05855	0.03626	0.03262	0.0899	0.04548	0.03351	0.03351	0.03351	0.03485	0.02033	0.03219	0.08335	0.03487	0.02034
0.04647	0.09472	0.08431	0.0152	0.02755	0.01301	0.01218	0.06336	0.01974	0.0152	0.01503	0.01503	0.01158	0.03571	0.01218	0.0537	0.01242	0.0087
0.0678	0.12283	0.063	0.02319	0.01256	0.00949	0.00962	0.05339	0.01131	0.01977	0.01168	0.01169	0.00914	0.05403	0.00962	0.04128	0.00927	0.00763
0.09723	0.14538	0.03566	0.02883	0.02378	0.02703	0.00737	0.0305	0.0049	0.01876	0.01181	0.01179	0.0264	0.02009	0.00737	0.02288	0.0129	0.02154
0.1114	0.1575	0.03077	0.02139	0.01787	0.02507	0.00537	0.0262	0.00552	0.01414	0.01052	0.0105	0.03375	0.01756	0.00537	0.02172	0.01141	0.01984
0.10231	0.1491	0.03538	0.02206	0.01707	0.01055	0.00522	0.02967	0.0126	0.01799	0.0052	0.00521	0.02376	0.0133	0.00522	0.02549	0.00259	0.00752
0.08761	0.13513	0.04294	0.0272	0.01661	0.01049	0.0048	0.03361	0.01227	0.02231	0.0075	0.00751	0.02827	0.01181	0.0048	0.02401	0.00316	0.00869
0.0278	0.07674	0.06645	0.03514	0.01714	0.04122	0.01907	0.06173	0.01304	0.02189	0.03514	0.02384	0.03976	0.01852	0.01909	0.04439	0.02043	0.02881
0.04386	0.094	0.06106	0.03271	0.01505	0.03519	0.01325	0.05569	0.00773	0.02144	0.01933	0.03271	0.03387	0.01652	0.01327	0.03547	0.01749	0.02663
0.07747	0.12953	0.06963	0.01992	0.02131	0.01083	0.01339	0.05288	0.01962	0.01998	0.01812	0.01812	0.03311	0.04691	0.01339	0.04239	0.01278	0.00984
0.0861	0.13376	0.05864	0.03502	0.02677	0.01702	0.02312	0.04373	0.02807	0.03511	0.02877	0.02877	0.03151	0.07336	0.02311	0.02801	0.0183	0.01491
0.07779	0.12272	0.06065	0.03276	0.02739	0.01323	0.02128	0.04442	0.02796	0.03271	0.02725	0.02725	0.02642	0.0059	0.02128	0.03244	0.01779	0.01245
0.14684	0.1899	0.01071	0.03411	0.02445	0.01941	0.00486	0.01076	0.00195	0.02382	0.01406	0.014	0.03418	0.01206	0.00485	0.00882	0.01171	0.01347
0.13723	0.17728	0.00649	0.0279	0.02179	0.02158	0.00666	0.0067	0.00265	0.01762	0.0131	0.01307	0.02943	0.02164	0.00666	0.00091	0.01311	0.01624
0.13687	0.17909	0.0135	0.02971	0.02044	0.02111	0.00757	0.01399	0.00252	0.02971	0.02971	0.01449	0.0291	0.01958	0.00757	0.00479	0.01283	0.01543
0.11363	0.15355	0.01677	0.04356	0.03859	0.04782	0.01671	0.01624	0.01532	0.03206	0.03473	0.03471	0.05302	0.03365	0.01671	0.00331	0.03294	0.03906
0.13505	0.16722	0.02373	0.05734	0.05226	0.04278	0.00637	0.02084	0.01589	0.03592	0.0271	0.05734	0.05551	0.02075	0.00638	0.00571	0.02865	0.02842
0.05252	0.09322	0.06226	0.02164	0.01494	0.01801	0.00859	0.04453	0.01463	0.01986	0.0149	0.01488	0.01528	0.00295	0.00859	0.03115	0.00926	0.0146
0.10481	0.15138	0.03497	0.03421	0.02501	0.0389	0.01075	0.03292	0.00619	0.02556	0.02491	0.02488	0.04795	0.02157	0.01077	0.00516	0.02274	0.03138
0.13887	0.18142	0.01575	0.02865	0.01906	0.01953	0.00697	0.01622	0.00237	0.01932	0.01414	0.0141	0.02849	0.01774	0.00697	0.00723	0.01185	0.01425
0.13314	0.17367	0.00898	0.02723	0.02169	0.02317	0.00862	0.00925	0.00333	0.01746	0.02723	0.01399	0.03011	0.02338	0.00862	0.00236	0.01413	0.01768
0.12404	0.16099	0.00608	0.0362	0.03231	0.03668	0.00494	0.00499	0.00602	0.02371	0.02494	0.02491	0.04397	0.02135	0.00494	0.00135	0.02297	0.02716
0.12332	0.16052	0.00835	0.03554	0.0317	0.03795	0.00995	0.00769	0.00828	0.02448	0.02735	0.02733	0.04419	0.02475	0.00995	0.0033	0.02518	0.03009
0.07766	0.13128	0.06299	0.02085	0.00811	0.01284	0.00827	0.05743	0.00739	0.01456	0.00657	0.00657	0.01301	0.01359	0.00781	0.03855	0.00659	0.00908
0.07398	0.12749	0.06093	0.02329	0.00629	0.00905	0.00429	0.05403	0.00584	0.01716	0.00571	0.00571	0.00905	0.01034	0.00429	0.03635	0.00342	0.00543
0.08478	0.13655	0.04635	0.03256	0.01585	0.0168	0.00994	0.04259	0.01026	0.02059	0.00758	0.00758	0.03389	0.01748	0.00994	0.02881	0.00854	0.01255
0.11007	0.15938	0.03081	0.02241	0.01733	0.01365	0.00407	0.02926	0.0064	0.01654	0.00193	0.00193	0.02503	0.01861	0.0032	0.01637	0.00491	0.01036
0.07786	0.12482	0.0516	0.03225	0.01854	0.0058	0.00888	0.03687	0.01659	0.02563	0.01096	0.01097	0.00587	0.00614	0.00887	0.03006	0.00473	0.0036
0.11688	0.16246	0.02623	0.0204	0.01797	0.02293	0.00395	0.02217	0.00691	0.01361	0.00887	0.00885	0.03201	0.01663	0.00395	0.02479	0.01007	0.0181
0.1041	0.15287	0.02728	0.02774	0.02375	0.0252	0.00612	0.02573	0.00254	0.01899	0.01061	0.0106	0.03768	0.02283	0.00358	0.01866	0.01277	0.02057
0.07457	0.11671	0.06991	0.03648	0.03333	0.01746	0.02614	0.04542	0.03339	0.03646	0.03203	0.03204	0.01752	0.01099	0.02613	0.03856	0.02267	0.01663
0.07413	0.12591	0.07056	0.02016	0.02281	0.01164	0.01422	0.05201	0.0205	0.02016	0.01897	0.01898	0.03422	0.0494	0.01422	0.04328	0.01683	0.01035
0.04322	0.09456	0.08148	0.01055	0.02118	0.01214	0.00767	0.0639	0.01284	0.00941	0.00847	0.00847	0.01094	0.03445	0.00747	0.05468	0.00622	0.00348
0.08107	0.13378	0.04964	0.03375	0.01401	0.00411	0.00693	0.04279	0.01282	0.02735	0.0107	0.01071	0.04207	0.00752	0.00693	0.03415	0.00529	0.00222
0.06754	0.12461	0.06376	0.01761	0.00587	0.0091	0.00415	0.05547	0.00294	0.01317	0.00308	0.00308	0.00848	0.04784	0.00348	0.04607	0.00245	0.00484
0.02996	0.08148	0.09092	0.01346	0.01976	0.0194	0.01265	0.07108	0.01188	0.00648	0.00833	0.00833	0.0192	0.0346	0.01179	0.06214	0.00698	0.00918
0.02232	0.07173	0.07761	0.03058	0.00632	0.02732	0.01256	0.06749	0.00598	0.0141	0.01044	0.01043	0.02768	0.01187	0.00921	0.05707	0.0091	0.01639
0.04437	0.07039	0.07394	0.05543	0.03888	0.06391	0.04174	0.07251	0.03757	0.04231	0.04692	0.0469	0.06288	0.03974	0.03414	0.06069	0.04149	0.04695
0.06117	0.1145	0.06899	0.01737	0.00839	0.01063	0.00385	0.05913	0.00501	0.0131	0.0044	0.00441	0.01035	0.00933	0.00312	0.04403	0.00246	0.00614
0.08227	0.1372	0.06239	0.01826	0.0059	0.00539	0.00183	0.0548	0.00548	0.01555	0.00597	0.00597	0.03731	0.05604	0.00183	0.0398	0.00155	0.00213
0.10645	0.1551	0.03105	0.02656	0.02049	0.00529	0.00561	0.02727	0.01348	0.02391	0.00789	0.0079	0.00538	0.0124	0.0056	0.01562	0.00192	0.00359
0.12137	0.16804	0.02542	0.02972	0.02684	0.00796	0.01581	0.02047	0.02238	0.03102	0.01811	0.01812	0.02578	0.00584	0.0158	0.03106	0.01003	0.00717
0.09265	0.14569	0.06074	0.01895	0.02373	0.01466	0.01509	0.03669	0.0223	0.01895	0.01895	0.01895	0.01289	0.05824	0.01509	0.03694	0.01355	0.012
0.08519	0.14107	0.0673	0.01144	0.02262	0.01547	0.00988	0.04749	0.01806	0.01144	0.01144	0.01144	0.02214	0.05387	0.00979	0.0483	0.00999	0.00856
0.08911	0.14329	0.06338	0.01348	0.02104	0.01194	0.00991	0.04088	0.01885	0.01348	0.01348	0.01348	0.02507	0.05481	0.01013	0.04141	0.00983	0.00829
0.11246	0.16248	0.02758	0.02705	0.02174	0.01179	0.00278	0.02656	0.00621	0.0207	0.00118	0.00118	0.02806	0.01818	0.00212	0.01032	0.00435	0.00901
0.1125	0.16042	0.02801	0.01935	0.01639	0.0232	0.00768	0.02674	0.00137	0.01325	0.00888	0.00887	0.03013	0.0234	0.00495	0.01763	0.0117	0.019
0.07879	0.13205	0.05053	0.03187	0.01051	0.0146	0.00626	0.04628	0.00397	0.02138	0.0025	0.0025	0.03777	0.01606	0.00488	0.02828	0.00541	0.01067
0.07265	0.12633	0.05299	0.0314	0.00819	0.01415	0.00483	0.04767	0.00227	0.02195	0.00183	0.00182	0.04193	0.01536	0.00268	0.03052	0.00515	0.01068
0.06759	0.12315	0.06551	0.0176	0.00599	0.00936	0.00341	0.05745	0.00307	0.01371	0.00375	0.00375	0.00884	0.04954	0.00259	0.04449	0.00255	0.00572
0.0797	0.13094	0.04552	0.03778	0.01744	0.00418	0.00696	0.03769	0.01408	0.02976	0.01048	0.01048	0.04138	0.00846	0.00695	0.02194	0.00389	0.00303
0.07735	0.12992	0.05792	0.02944	0.01946	0.01187	0.01674	0.04358	0.02055	0.02976	0.02134	0.02134	0.04588	0.05806	0.01673	0.03283	0.01375	0.01079
0.09059	0.14271	0.05317	0.03232	0.02012	0.01295	0.01758	0.04023	0.02153	0.03239	0.02222	0.02222	0.01294	0.00469	0.01758	0.02735	0.01383	0.01141
0.10073	0.15017	0.04098	0.03976	0.02683	0.01275	0.01883	0.03142	0.02487	0.03875	0.02272	0.02273	0.01289	0.08812	0.01883	0.01733	0.0125	0.01011
0.14325	0.18815	0.01375	0.02322	0.02255	0.00511	0.01105	0.01171	0.01378	0.02405	0.01183	0.01183	0.02108	0.00833	0.01105	0.01026	0.00681	0.00489
0.13777	0.18076	0.01777	0.01938	0.01824	0.00392	0.01109	0.01494	0.01759	0.01996	0.01196	0.01197	0.01713	0.01061	0.01108	0.01369	0.00624	0.00339
0.14603	0.18794	0.01274	0.01777	0.01737	0.00312	0.00956	0.01033	0.01416	0.01827	0.00855	0.00855	0.01715	0.01122	0.00955	0.01026	0.00347	0.00205
0.04281	0.07457	0.07031	0.05759	0.0404	0.06268	0.04088	0.06951	0.03683	0.04333	0.0469	0.04687	0.06189	0.04157	0.03307	0.05716	0.04304	0.04976
0.04931	0.10119	0.06868	0.0455	0.02985	0.0439	0.03169	0.06738	0.02531	0.03192	0.03079	0.03078	0.04495	0.03474	0.02703	0.06025	0.02988	0.03642
0.07127	0.1309	0.05488	0.0277	0.01088	0.01646	0.01128	0.0527	0.00638	0.02004	0.00742	0.00741	0.01652	0.05341	0.0098	0.04475	0.00943	0.01265
0.09299	0.15113	0.05548	0.01083	0.00738	0.01036	0.00721	0.04542	0.00489	0.00752	0.00387	0.00387	0.03634	0.0587	0.00683	0.04627	0.00523	0.00683
0.10673	0.16418	0.04227	0.02066	0.0065	0.0041	0.00251	0.03444	0.00293	0.01771	0.00304	0.00304	0.00375	0.05004	0.00251	0.03328	0.00189	0.00249
0.10335	0.16099	0.04435	0.02342	0.00793	0.00492	0.00276	0.03736	0.00238	0.01948	0.0023	0.0023	0.0047	0.00925	0.00276	0.03436	0.00204	0.00317
0.11325	0.1609	0.02219	0.02601	0.02425	0.01489	0.00281	0.02046	0.00903	0.01987	0.00183	0.00183	0.02993	0.01844	0.00281	0.02274	0.00538	0.01151
0.11122	0.16208	0.02791	0.0322	0.02446	0.00811	0.0024	0.0267	0.00823	0.0254	0.00367	0.00367	0.03137	0.01541	0.0024	0.0103	0.00241	0.10467
0.12238	0.17104	0.02185	0.02563	0.02415	0.00439	0.00549	0.02029	0.01152	0.02454	0.00724	0.00724	0.02645	0.0129	0.00549	0.02343	0.00277	0.00288
0.1234	0.17273	0.02424	0.02624	0.02393	0.00325	0.00687	0.02251	0.01218	0.02588	0.0092	0.0092	0.02618	0.20304	0.00686	0.02061	0.0044	0.00276
0.05747	0.09847	0.06182	0.06646	0.05143	0.07034	0.04345	0.06367	0.04081	0.05248	0.0552	0.05516	0.06811	0.04967	0.03484	0.04785	0.05164	0.05984
0.05503	0.10119	0.06963	0.06058	0.04639	0.06403	0.04468	0.07147	0.03947	0.04669	0.04974	0.04971	0.06437	0.04831	0.03756	0.05751	0.04696	0.05491
0.0656	0.12486	0.06148	0.02416	0.0109	0.01836	0.01339	0.05771	0.00923	0.01655	0.00944	0.00944	0.01846	0.04881	0.01218	0.04918	0.01057	0.01376
0.07957	0.13765	0.06465	0.01596	0.00982	0.01478	0.01103	0.0586	0.00802	0.01073	0.00708	0.00708	0.01454	0.05172	0.01041	0.052	0.00822	0.01061
0.10583	0.16381	0.04065	0.02386	0.00985	0.00629	0.00421	0.03483	0.00113	0.01954	0.00126	0.00126	0.00619	0.069	0.00382	0.03363	0.00347	0.00474
0.10648	0.16442	0.04158	0.02139	0.00816	0.00668	0.00465	0.0353	0.00171	0.01732	0.00166	0.00166	0.00654	0.06842	0.00429	0.03478	0.00379	0.00505
0.1129	0.17015	0.03746	0.02496	0.01068	0.00417	0.0024	0.03151	0.00072	0.02112	0.00065	0.00065	0.00407	0.07291	0.0024	0.0294	0.00192	0.00296
0.12061	0.17024	0.02302	0.02591	0.0237	0.00937	0.00161	0.0226	0.00555	0.02181	0.00115	0.00115	0.02693	0.01723	0.00161	0.01749	0.00347	0.0072
0.10648	0.15672	0.03123	0.02774	0.0201	0.01316	0.00401	0.02964	0.0068	0.01987	0.00199	0.00199	0.0287	0.01821	0.00325	0.01433	0.00473	0.10356
0.11135	0.15874	0.03166	0.02305	0.01957	0.00845	0.01031	0.02842	0.01709	0.02194	0.01213	0.01214	0.02231	0.01275	0.0103	0.0272	0.00784	0.00616
0.12064	0.17002	0.0246	0.02588	0.02332	0.00416	0.00521	0.02309	0.01113	0.02461	0.00741	0.00742	0.0266	0.01246	0.0052	0.0197	0.00297	0.00278
0.04703	0.09804	0.0731	0.04489	0.0312	0.04568	0.03444	0.07184	0.02823	0.0328	0.03301	0.033	0.04683	0.03638	0.02999	0.06524	0.03186	0.038
0.07576	0.13521	0.05712	0.0214	0.00797	0.01388	0.00972	0.05273	0.00588	0.01537	0.00588	0.00587	0.01372	0.05284	0.00876	0.04803	0.00758	0.01017
0.10102	0.15787	0.05003	0.0238	0.00672	0.00558	0.00381	0.04317	0.00459	0.01963	0.00461	0.00462	0.00544	0.0578	0.00356	0.03471	0.003	0.00377
0.11029	0.16678	0.04504	0.02432	0.00797	0.00393	0.00233	0.03787	0.00326	0.02047	0.00333	0.00333	0.00378	0.00891	0.00233	0.03112	0.00175	0.00249
0.11391	0.16682	0.03199	0.03857	0.0243	0.0036	0.00204	0.03103	0.00638	0.03006	0.00449	0.00449	0.03714	0.18605	0.00204	0.00741	0.00141	0.00236
0.11526	0.16778	0.02997	0.03838	0.02582	0.00326	0.00242	0.02902	0.00682	0.03056	0.00482	0.00483	0.0368	0.18742	0.00242	0.00685	0.00154	0.00211
0.12642	0.17218	0.02029	0.02211	0.0211	0.00486	0.00894	0.01803	0.01585	0.02206	0.00994	0.00994	0.02174	0.01227	0.00893	0.03472	0.00478	0.00348
0.12778	0.17503	0.02027	0.02148	0.02062	0.00426	0.00569	0.01873	0.0118	0.02125	0.00747	0.00748	0.02177	0.01308	0.00568	0.02938	0.0028	0.00279
0.11404	0.17147	0.02884	0.02612	0.01386	0.00186	0.00093	0.02379	0.00243	0.02342	0.00218	0.00218	0.00166	0.00615	0.00093	0.02369	0.00073	0.00106
0.03718	0.07689	0.07071	0.05052	0.03456	0.05837	0.03713	0.06902	0.03213	0.03872	0.04208	0.04206	0.05753	0.03712	0.03036	0.05419	0.03851	0.04606
0.06566	0.1082	0.0551	0.0703	0.05576	0.07012	0.04108	0.05675	0.03877	0.05395	0.05523	0.05518	0.06672	0.04972	0.03212	0.04018	0.05149	0.0598
0.07149	0.13072	0.05831	0.02388	0.00876	0.01524	0.01067	0.05457	0.00677	0.01702	0.0069	0.0069	0.01524	0.05189	0.00964	0.04655	0.00831	0.0112
0.09725	0.15462	0.05636	0.01692	0.00447	0.00879	0.00583	0.04832	0.00333	0.01265	0.00272	0.00272	0.04073	0.04867	0.00544	0.0437	0.00415	0.00599
0.10568	0.16199	0.04617	0.02927	0.01112	0.00577	0.00291	0.04212	0.00241	0.02321	0.00201	0.00201	0.00575	0.01132	0.00291	0.02858	0.00225	0.00402
0.10495	0.15735	0.0325	0.03893	0.02372	0.00872	0.00283	0.03146	0.00671	0.02764	0.00286	0.00287	0.03681	0.01539	0.00283	0.01034	0.00289	0.00632
0.12685	0.17126	0.01817	0.01724	0.01725	0.0165	0.00334	0.0155	0.00972	0.01313	0.00303	0.00302	0.02587	0.0163	0.00333	0.01369	0.00608	0.01291
0.12685	0.17312	0.01791	0.02081	0.02092	0.00801	0.00413	0.01644	0.01078	0.0193	0.00434	0.00435	0.02243	0.01562	0.00412	0.03128	0.00187	0.0058
0.12158	0.17035	0.02576	0.02134	0.01913	0.00599	0.00345	0.02448	0.0097	0.02009	0.00576	0.00577	0.02196	0.0143	0.00345	0.02023	0.00199	0.00408
0.11452	0.17079	0.03826	0.03181	0.01525	0.00413	0.00209	0.03369	0.00137	0.02606	0.00099	0.00099	0.00413	0.00982	0.00174	0.02397	0.00178	0.003
0.03631	0.07283	0.06991	0.05106	0.03358	0.05747	0.03582	0.06759	0.03099	0.03748	0.04097	0.04094	0.05663	0.03544	0.02849	0.05474	0.03711	0.04448
0.0467	0.09853	0.07507	0.04295	0.03053	0.04578	0.03566	0.07393	0.02961	0.0323	0.03334	0.03332	0.04692	0.03675	0.03168	0.06679	0.03226	0.0381
0.07887	0.13816	0.0559	0.01723	0.00663	0.01143	0.00809	0.04883	0.00533	0.01248	0.00501	0.00501	0.011	0.01233	0.0075	0.04792	0.00608	0.00788
0.08299	0.14101	0.05671	0.02469	0.00738	0.01284	0.00842	0.05363	0.00452	0.01793	0.00447	0.00447	0.01285	0.0581	0.00756	0.04192	0.00647	0.00938
0.09245	0.14948	0.0535	0.02706	0.00801	0.01115	0.00688	0.05133	0.00266	0.01984	0.00272	0.00272	0.04546	0.01504	0.00607	0.03602	0.00543	0.00828
0.092	0.14836	0.05352	0.02852	0.00967	0.01387	0.00887	0.05295	0.00354	0.02015	0.00426	0.00425	0.04188	0.01762	0.00785	0.03356	0.00731	0.01073
0.09866	0.15475	0.04378	0.03632	0.01635	0.0097	0.00521	0.04314	0.00092	0.02715	0.00151	0.00151	0.04831	0.01513	0.00521	0.02436	0.00474	0.00744
0.11485	0.16269	0.02564	0.0217	0.01932	0.01258	0.0031	0.02392	0.00886	0.01715	0.00211	0.00211	0.01275	0.01767	0.0031	0.0137	0.00399	0.00946
0.10769	0.15748	0.03291	0.02694	0.02031	0.00756	0.00751	0.03026	0.01398	0.02379	0.0096	0.0096	0.02699	0.01298	0.00751	0.01719	0.00571	0.00548
0.11645	0.17139	0.03658	0.03577	0.01916	0.00432	0.0019	0.03412	0.00189	0.02776	0.00117	0.00117	0.00436	0.01076	0.0019	0.01588	0.00179	0.00318
0.05457	0.10276	0.0724	0.05095	0.03823	0.05586	0.03975	0.07285	0.0335	0.03865	0.04162	0.04161	0.05668	0.04261	0.03447	0.0588	0.03955	0.0473
0.05583	0.10418	0.0615	0.05485	0.03967	0.05317	0.03317	0.0624	0.02782	0.03941	0.03886	0.03883	0.05327	0.03918	0.02835	0.04766	0.03672	0.04485
0.07177	0.1294	0.07003	0.01609	0.01445	0.01806	0.01453	0.0633	0.01165	0.01096	0.01054	0.01053	0.01791	0.04678	0.0139	0.05581	0.01364	0.01341
0.07776	0.13536	0.06184	0.02325	0.00916	0.0172	0.01209	0.05941	0.00755	0.01589	0.00742	0.00742	0.01733	0.01801	0.01103	0.04536	0.0094	0.01298
0.09501	0.15128	0.05449	0.02435	0.0062	0.00795	0.00551	0.04984	0.00517	0.01882	0.00513	0.00513	0.04095	0.06484	0.00551	0.03764	0.00417	0.00554
0.10117	0.15441	0.03988	0.03659	0.01868	0.00636	0.00507	0.03759	0.01001	0.02779	0.00761	0.00762	0.03792	0.01175	0.00507	0.01621	0.00438	0.00456
0.12778	0.17503	0.02027	0.02148	0.02062	0.00426	0.00569	0.01873	0.0118	0.02125	0.00747	0.00748	0.02177	0.01308	0.00568	0.02938	0.0028	0.00279
0.1257	0.17378	0.02295	0.0216	0.0201	0.00411	0.00529	0.02148	0.01134	0.0213	0.00757	0.00758	0.02191	0.01278	0.00529	0.02481	0.00294	0.00272
0.11134	0.16211	0.03438	0.02719	0.01934	0.00546	0.00646	0.03223	0.0123	0.02454	0.00943	0.00943	0.02724	0.01155	0.00645	0.01444	0.005	0.00394
0.11451	0.17129	0.03604	0.0299	0.01441	0.00334	0.00158	0.03077	0.00164	0.02536	0.00135	0.00135	0.04689	0.00862	0.00158	0.02549	0.00132	0.00232
0.05298	0.10276	0.06845	0.05166	0.03702	0.05349	0.03754	0.07073	0.03138	0.03823	0.03942	0.0394	0.05445	0.04104	0.03169	0.05808	0.03767	0.0453
0.05241	0.10599	0.0637	0.04376	0.0258	0.03898	0.02699	0.06197	0.02046	0.02898	0.0257	0.02568	0.03989	0.03121	0.02281	0.05366	0.0254	0.03201
0.09293	0.15063	0.06296	0.01131	0.01169	0.01391	0.01061	0.0533	0.00856	0.00756	0.00651	0.00651	0.01324	0.05687	0.01018	0.05283	0.0081	0.01012
0.08769	0.14089	0.0465	0.03178	0.01584	0.02369	0.01326	0.0451	0.00557	0.01997	0.01017	0.01016	0.02412	0.0243	0.01327	0.02387	0.0129	0.01914
0.09062	0.14694	0.04862	0.03367	0.01297	0.01304	0.00752	0.04806	0.00218	0.02424	0.00338	0.00338	0.04723	0.01714	0.00629	0.02902	0.00655	0.01003
0.10543	0.16206	0.04948	0.02491	0.00743	0.00666	0.00383	0.04411	0.00133	0.01955	0.00128	0.00128	0.00661	0.06993	0.00384	0.03365	0.00288	0.00473
0.09887	0.15238	0.04145	0.03595	0.01717	0.00761	0.00429	0.03946	0.00821	0.0262	0.00585	0.00586	0.03783	0.01308	0.00429	0.01755	0.00363	0.00524
0.11667	0.16353	0.02435	0.0264	0.02452	0.0065	0.01072	0.02153	0.01807	0.02533	0.01126	0.01127	0.02644	0.01209	0.01071	0.02994	0.0064	0.0047
0.11262	0.16417	0.0355	0.02741	0.01802	0.00558	0.00284	0.03444	0.00797	0.02288	0.00561	0.00561	0.02734	0.013	0.00284	0.01028	0.00231	0.00373
0.10388	0.15172	0.036	0.02246	0.01785	0.01159	0.00911	0.03254	0.01498	0.01933	0.00987	0.00988	0.01192	0.01455	0.00911	0.02672	0.00762	0.00855
0.05617	0.10225	0.05822	0.05483	0.04072	0.05918	0.03401	0.05936	0.02976	0.04178	0.04389	0.04386	0.05733	0.04005	0.02741	0.03977	0.04089	0.0497
0.05704	0.10826	0.06184	0.04884	0.03269	0.04731	0.03019	0.06197	0.02388	0.03424	0.03278	0.03276	0.04797	0.03569	0.02462	0.04932	0.03156	0.03964
0.06306	0.11971	0.05924	0.03672	0.01828	0.0294	0.0202	0.05689	0.01369	0.02505	0.01705	0.01703	0.02996	0.02637	0.01726	0.04437	0.0183	0.02389
0.09691	0.14874	0.03806	0.03358	0.01861	0.01244	0.00545	0.03582	0.00778	0.02228	0.00381	0.00381	0.01267	0.01665	0.00545	0.01754	0.00494	0.00898
0.09454	0.1435	0.04035	0.0244	0.01795	0.02703	0.01019	0.03609	0.00471	0.01565	0.01142	0.0114	0.02689	0.02183	0.0102	0.02631	0.01303	0.02154
0.08563	0.14114	0.05607	0.02833	0.0119	0.02088	0.0142	0.05595	0.00795	0.01858	0.00942	0.00942	0.03973	0.02261	0.0142	0.0345	0.0121	0.01678
0.09248	0.14567	0.04197	0.03642	0.01719	0.01156	0.00586	0.03962	0.00747	0.02435	0.00447	0.00448	0.03714	0.01564	0.00586	0.01973	0.00506	0.00823
0.10785	0.15786	0.03391	0.02715	0.0201	0.00718	0.00813	0.03118	0.01446	0.02442	0.01058	0.01058	0.02715	0.01233	0.00812	0.01889	0.00631	0.00522
0.11262	0.16417	0.0355	0.02741	0.01802	0.00558	0.00284	0.03444	0.00797	0.02288	0.00561	0.00561	0.02734	0.013	0.00284	0.01028	0.00231	0.00373
0.11311	0.17048	0.03286	0.02677	0.0132	0.00279	0.00128	0.02745	0.00178	0.02339	0.00154	0.00154	0.00266	0.07396	0.00129	0.02619	0.00103	0.00182
0.06003	0.10636	0.06636	0.05863	0.04596	0.06475	0.04282	0.06832	0.03784	0.04621	0.04984	0.04981	0.06419	0.04744	0.03673	0.05034	0.04681	0.05536
0.05836	0.11008	0.06051	0.04793	0.03075	0.04497	0.02813	0.05988	0.02167	0.03273	0.03035	0.03033	0.0456	0.03402	0.02282	0.04776	0.02943	0.03753
0.07077	0.12942	0.05483	0.03036	0.01117	0.01681	0.01092	0.05239	0.00604	0.02176	0.00704	0.00704	0.01699	0.01765	0.00943	0.04102	0.00901	0.0127
0.09584	0.15425	0.04526	0.0251	0.00921	0.00672	0.00389	0.03959	0.00137	0.0202	0.00135	0.00135	0.04982	0.05228	0.00335	0.03659	0.00305	0.0047
0.09788	0.15392	0.04927	0.02987	0.01024	0.00792	0.00428	0.04687	0.00326	0.0225	0.00263	0.00264	0.04269	0.01292	0.00428	0.02894	0.00325	0.00553
0.10231	0.15712	0.04548	0.03225	0.01321	0.00647	0.00347	0.04359	0.00517	0.02442	0.00409	0.00409	0.00652	0.01227	0.00347	0.02199	0.00272	0.00438
0.09768	0.15	0.0413	0.03286	0.01651	0.00937	0.00557	0.0388	0.0097	0.02352	0.00683	0.00684	0.03223	0.01405	0.00557	0.01819	0.00472	0.00662
0.11436	0.16415	0.02966	0.02667	0.02171	0.00524	0.00722	0.02747	0.01357	0.02507	0.00977	0.00978	0.02694	0.01176	0.00722	0.0197	0.00505	0.00378
0.11588	0.16915	0.03638	0.03311	0.01935	0.00303	0.00214	0.03474	0.00605	0.02654	0.00485	0.00485	0.00304	0.18825	0.00213	0.01178	0.00169	0.00196
0.09788	0.15392	0.04927	0.02987	0.01024	0.00792	0.00428	0.04687	0.00326	0.0225	0.00263	0.00264	0.04269	0.01292	0.00428	0.02894	0.00325	0.00553
0.06558	0.11126	0.05377	0.06474	0.05092	0.0667	0.03764	0.05537	0.03535	0.04978	0.05169	0.05164	0.06368	0.04638	0.02945	0.03857	0.04801	0.05677
0.06429	0.11019	0.0552	0.06293	0.04926	0.065	0.03725	0.05687	0.03437	0.04808	0.05003	0.04999	0.06253	0.0455	0.03011	0.03901	0.04654	0.05529
0.0602	0.11703	0.06111	0.03504	0.01704	0.02827	0.0195	0.058	0.01328	0.02348	0.01601	0.016	0.02884	0.02491	0.01691	0.04615	0.01709	0.02255
0.10045	0.15771	0.04559	0.02982	0.01178	0.00653	0.00344	0.04154	0.00185	0.02378	0.00136	0.00137	0.0065	0.01158	0.00345	0.03146	0.00277	0.00464
0.10831	0.16559	0.04373	0.01569	0.00311	0.00495	0.00296	0.03511	0.0019	0.01314	0.00225	0.00225	0.0044	0.00828	0.00279	0.03505	0.00212	0.00295
0.09998	0.15505	0.04756	0.03113	0.01165	0.00832	0.00421	0.04618	0.00343	0.02275	0.00251	0.00251	0.03796	0.01378	0.00421	0.02431	0.00328	0.0059
0.10999	0.16003	0.03064	0.02688	0.02048	0.00827	0.00403	0.02878	0.01033	0.02223	0.00567	0.00568	0.02694	0.0149	0.00403	0.01376	0.00304	0.00572
0.12098	0.1718	0.03113	0.02715	0.02168	0.00386	0.00723	0.02901	0.01186	0.02635	0.01007	0.01007	0.00388	0.00838	0.00723	0.01027	0.00551	0.00393
0.12138	0.17335	0.0335	0.02707	0.01961	0.00239	0.00287	0.03225	0.00689	0.02422	0.00566	0.00566	0.00241	0.00979	0.00287	0.00685	0.0021	0.00166
0.11656	0.17378	0.03004	0.01884	0.00814	0.00266	0.00129	0.0246	0.00144	0.0167	0.00151	0.00152	0.00228	0.00637	0.00115	0.02516	0.00093	0.00152
0.05221	0.10209	0.06951	0.04948	0.03536	0.05122	0.03618	0.07074	0.02988	0.03641	0.03735	0.03734	0.05224	0.03954	0.03076	0.05872	0.03574	0.04314
0.07987	0.13836	0.06162	0.01405	0.00901	0.01269	0.00966	0.05306	0.00718	0.00977	0.00641	0.00641	0.01221	0.05171	0.00921	0.05089	0.00731	0.00889
0.09334	0.14867	0.0526	0.02796	0.00802	0.0106	0.00621	0.0508	0.0035	0.01972	0.00313	0.00313	0.03729	0.01472	0.00564	0.02985	0.00466	0.00755
0.10816	0.16523	0.04832	0.01422	0.00313	0.00642	0.00406	0.03914	0.00199	0.01122	0.00149	0.00149	0.00593	0.04533	0.00379	0.03854	0.00284	0.00417
0.10056	0.15434	0.04685	0.0299	0.01189	0.00726	0.00449	0.04472	0.00732	0.02251	0.0062	0.0062	0.03292	0.01241	0.00449	0.02134	0.00383	0.00506
0.09804	0.15143	0.04074	0.03647	0.01767	0.00868	0.00431	0.03893	0.00742	0.02579	0.00476	0.00476	0.03755	0.01414	0.00431	0.017	0.00367	0.00602
0.10732	0.1543	0.02742	0.02688	0.02405	0.02019	0.00454	0.02316	0.00906	0.01836	0.00563	0.00561	0.03464	0.01779	0.00454	0.02354	0.00808	0.01576
0.1087	0.1557	0.03	0.02206	0.01907	0.01383	0.00569	0.02685	0.01173	0.01652	0.00408	0.00409	0.01394	0.01609	0.00569	0.02576	0.00504	0.01008
0.10942	0.16154	0.0347	0.03312	0.02056	0.00594	0.00278	0.03355	0.00796	0.02578	0.0052	0.0052	0.03227	0.01314	0.00278	0.01034	0.00227	0.004
0.10039	0.15861	0.03698	0.02142	0.00892	0.00368	0.00234	0.02997	0.00377	0.01874	0.00358	0.00358	0.00323	0.00682	0.00234	0.03084	0.00204	0.00228
0.05355	0.10363	0.07076	0.047	0.0338	0.05012	0.03553	0.07116	0.02903	0.0346	0.03613	0.03611	0.05112	0.03871	0.03061	0.05853	0.03462	0.04205
0.05685	0.11425	0.06377	0.03491	0.01874	0.03045	0.02199	0.0608	0.01595	0.02379	0.01854	0.01853	0.03104	0.02649	0.01921	0.05383	0.01935	0.02459
0.08028	0.13918	0.05353	0.02853	0.01136	0.01524	0.01043	0.05204	0.00545	0.02094	0.00647	0.00646	0.01533	0.01757	0.00918	0.04201	0.00886	0.01193
0.09131	0.14591	0.04826	0.03224	0.01213	0.01428	0.00767	0.04725	0.00273	0.02181	0.00351	0.00351	0.03757	0.01803	0.00768	0.02493	0.00658	0.07717
0.10298	0.1604	0.047	0.02437	0.00786	0.00595	0.00336	0.04069	0.00167	0.0197	0.00159	0.00159	0.00582	0.0678	0.00336	0.03505	0.00251	0.00408
0.10712	0.1599	0.03458	0.03831	0.0224	0.00526	0.0033	0.03318	0.00846	0.02904	0.00574	0.00574	0.03751	0.01221	0.0033	0.01088	0.00253	0.00351
0.12043	0.16722	0.02278	0.02116	0.0201	0.008	0.00555	0.02077	0.01272	0.01957	0.00616	0.00617	0.02275	0.0148	0.00554	0.02765	0.00272	0.00555
0.12517	0.17071	0.01982	0.02139	0.02089	0.00631	0.00771	0.01766	0.01485	0.02069	0.00788	0.00789	0.02222	0.01348	0.00771	0.03425	0.00351	0.00423
0.11958	0.1683	0.02878	0.02279	0.01927	0.00486	0.00788	0.0266	0.01419	0.02259	0.0108	0.01081	0.0221	0.0113	0.00787	0.01369	0.00568	0.00375
0.10348	0.16125	0.04025	0.02489	0.01014	0.00369	0.00231	0.03339	0.00372	0.02149	0.00347	0.00347	0.00344	0.00785	0.00231	0.03153	0.00182	0.00231
0.06107	0.11337	0.06488	0.03883	0.02553	0.04133	0.02749	0.06222	0.02051	0.02697	0.0267	0.02669	0.04212	0.03216	0.02362	0.04993	0.0263	0.03405
0.05192	0.10671	0.06853	0.03762	0.02293	0.03582	0.0263	0.06499	0.02004	0.0247	0.02335	0.02334	0.03671	0.0293	0.02324	0.05537	0.02319	0.02896
0.06938	0.12691	0.06507	0.02667	0.01384	0.02442	0.01807	0.0631	0.01277	0.01803	0.01337	0.01336	0.02475	0.02304	0.01647	0.04889	0.01491	0.01935
0.08946	0.14423	0.04971	0.03151	0.01202	0.01663	0.00962	0.04897	0.00345	0.02109	0.00518	0.00517	0.03825	0.01973	0.00812	0.02677	0.00838	0.07671
0.09814	0.15604	0.04885	0.02467	0.00802	0.00793	0.0049	0.0435	0.00151	0.01932	0.00148	0.00148	0.04807	0.05509	0.00434	0.03766	0.00387	0.00577
0.10867	0.15883	0.02785	0.03194	0.02477	0.00801	0.00484	0.02586	0.01148	0.02568	0.00591	0.00592	0.00816	0.01461	0.00483	0.01373	0.00305	0.00552
0.11601	0.16704	0.02614	0.03174	0.02559	0.00812	0.00163	0.02585	0.00545	0.02551	0.00174	0.00174	0.03118	0.01593	0.00163	0.01113	0.00287	0.00612
0.12676	0.17146	0.01854	0.02101	0.02117	0.00736	0.00785	0.01591	0.01497	0.01991	0.00668	0.00669	0.02242	0.01373	0.00784	0.03608	0.00285	0.00507
0.12138	0.16937	0.02613	0.02262	0.01998	0.00482	0.00811	0.02394	0.01468	0.02252	0.01065	0.01065	0.02204	0.01164	0.00811	0.02598	0.00547	0.00359
0.11994	0.1765	0.02878	0.03038	0.01639	0.00124	0.00108	0.02375	0.00306	0.02689	0.0028	0.0028	0.04669	0.00594	0.00108	0.02081	0.0009	0.00078
0.06076	0.1108	0.05611	0.05535	0.03871	0.05312	0.03126	0.05679	0.02611	0.03984	0.03821	0.03818	0.05296	0.03842	0.0244	0.04297	0.03638	0.04516
0.06587	0.12411	0.05634	0.03552	0.01694	0.02546	0.01783	0.05518	0.01176	0.02511	0.01445	0.01444	0.02586	0.02445	0.01528	0.04319	0.01608	0.02074
0.08643	0.14389	0.05322	0.02998	0.01128	0.01507	0.00992	0.05255	0.00452	0.02158	0.00563	0.00562	0.05003	0.01816	0.00872	0.03671	0.00842	0.01181
0.09771	0.15128	0.04409	0.0316	0.01482	0.01676	0.00938	0.04425	0.00242	0.02104	0.00533	0.00532	0.01706	0.021	0.00777	0.01838	0.00881	0.08369
0.1001	0.15367	0.04365	0.03189	0.01442	0.01302	0.00656	0.04353	0.00157	0.0215	0.00238	0.00238	0.01324	0.0182	0.00529	0.01928	0.00602	0.01004
0.10254	0.15586	0.03778	0.03764	0.01983	0.00871	0.0033	0.03693	0.00541	0.02656	0.00264	0.00265	0.03736	0.015	0.00279	0.01519	0.00308	0.00629
0.10167	0.15526	0.03567	0.04174	0.02267	0.00727	0.0029	0.03448	0.00679	0.03016	0.00376	0.00377	0.04284	0.01373	0.0029	0.01269	0.00259	0.00508
0.10491	0.15706	0.03773	0.033	0.01889	0.00634	0.00506	0.03565	0.01041	0.02582	0.00769	0.00769	0.03251	0.01229	0.00505	0.01404	0.00422	0.00449
0.10547	0.16197	0.04786	0.02711	0.00924	0.00621	0.00335	0.04318	0.00181	0.02141	0.00162	0.00162	0.00617	0.0115	0.00335	0.03116	0.00255	0.00437
0.08602	0.1451	0.04473	0.03086	0.0134	0.00985	0.00606	0.04199	0.00164	0.0243	0.00271	0.00271	0.00984	0.01364	0.00505	0.03666	0.00529	0.0075
0.05471	0.10424	0.06437	0.05454	0.03924	0.05498	0.0365	0.065	0.0308	0.03998	0.04064	0.04062	0.05558	0.04135	0.02998	0.05264	0.03861	0.04668
0.06136	0.11903	0.05954	0.03425	0.01586	0.02605	0.01792	0.05679	0.01184	0.02334	0.01434	0.01433	0.02653	0.02368	0.01543	0.04518	0.01567	0.02071
0.08761	0.14572	0.05984	0.02043	0.00828	0.01442	0.01052	0.05607	0.00652	0.01443	0.00611	0.00611	0.04573	0.05792	0.00975	0.04774	0.00836	0.01106
0.10334	0.15986	0.04915	0.02766	0.00936	0.00772	0.00446	0.04561	0.00117	0.02122	0.00114	0.00114	0.00773	0.01289	0.00447	0.03167	0.00353	0.00566
0.10335	0.16078	0.04836	0.02194	0.00606	0.00642	0.00383	0.04137	0.00142	0.01753	0.00132	0.00132	0.00625	0.0107	0.00343	0.037	0.00283	0.00443
0.09732	0.15288	0.04256	0.03716	0.01689	0.00677	0.00343	0.04068	0.00543	0.02842	0.00374	0.00375	0.04861	0.01234	0.00343	0.02209	0.00279	0.00463
0.10843	0.15807	0.02951	0.03153	0.02533	0.00674	0.00993	0.0266	0.01677	0.02844	0.0116	0.0116	0.00688	0.01174	0.00992	0.0214	0.0069	0.00509
0.11037	0.16083	0.03267	0.02693	0.01971	0.00652	0.0051	0.03071	0.01123	0.02333	0.00754	0.00755	0.02712	0.01327	0.0051	0.01522	0.00384	0.00447
0.10762	0.16433	0.04224	0.02896	0.01209	0.00356	0.00213	0.03635	0.00413	0.02449	0.00376	0.00376	0.00346	0.00875	0.00213	0.02821	0.00169	0.00227
0.09223	0.14963	0.03829	0.04002	0.02053	0.00734	0.00322	0.03661	0.00259	0.03206	0.00107	0.00107	0.00738	0.01259	0.00233	0.0252	0.00318	0.00538
0.06377	0.1084	0.05764	0.06472	0.05104	0.06718	0.04028	0.05949	0.03687	0.04997	0.05221	0.05217	0.06474	0.0476	0.03308	0.04153	0.04867	0.05726
0.04897	0.09849	0.07231	0.04836	0.0345	0.04953	0.03622	0.07275	0.02997	0.03571	0.03629	0.03628	0.05066	0.03883	0.03114	0.06312	0.03479	0.04155
0.07841	0.13575	0.06902	0.01841	0.01369	0.01991	0.01535	0.06606	0.01153	0.0123	0.01038	0.01038	0.0199	0.05167	0.01448	0.05432	0.01548	0.01529
0.09854	0.15428	0.04717	0.03194	0.01218	0.00738	0.00388	0.04503	0.00406	0.02417	0.00312	0.00313	0.0431	0.01267	0.00389	0.02613	0.00301	0.0051
0.06834	0.12398	0.07039	0.02114	0.0143	0.02166	0.01707	0.06525	0.01313	0.01407	0.01244	0.01244	0.022	0.0542	0.01613	0.05065	0.01331	0.01663
0.08578	0.13996	0.04393	0.03796	0.01701	0.01649	0.0079	0.04196	0.00355	0.02535	0.0047	0.00469	0.04293	0.01899	0.0079	0.02305	0.00748	0.01253
0.10228	0.15095	0.03153	0.02751	0.0213	0.01503	0.00556	0.02893	0.01035	0.01899	0.00376	0.00376	0.01521	0.01712	0.00556	0.02239	0.00562	0.0111
0.10994	0.15862	0.02901	0.02636	0.02204	0.00802	0.00747	0.02639	0.01444	0.0233	0.00858	0.00859	0.02681	0.01368	0.00747	0.02266	0.00501	0.00565
0.11959	0.17169	0.03071	0.03217	0.02353	0.00234	0.00317	0.02947	0.00726	0.02786	0.00573	0.00573	0.00236	0.00973	0.00317	0.00685	0.00215	0.00164
0.10429	0.16212	0.03698	0.02379	0.01039	0.00321	0.00234	0.02998	0.00451	0.02115	0.00426	0.00427	0.0029	0.05014	0.00234	0.02968	0.00226	0.00209
0.05684	0.10426	0.0683	0.05876	0.04527	0.06383	0.04385	0.07	0.03852	0.04572	0.04924	0.04922	0.06406	0.04777	0.03691	0.05499	0.04645	0.05476
0.06136	0.11903	0.05954	0.03425	0.01586	0.02605	0.01792	0.05679	0.01184	0.02334	0.01434	0.01433	0.02653	0.02368	0.01543	0.04518	0.01567	0.02071
0.08473	0.1427	0.06499	0.01419	0.01105	0.01503	0.01131	0.05802	0.00827	0.0094	0.00697	0.00697	0.01464	0.05322	0.01071	0.054	0.00854	0.01098
0.10312	0.16027	0.05076	0.02277	0.00615	0.00755	0.0047	0.04468	0.00155	0.0177	0.00133	0.00133	0.00746	0.06723	0.00424	0.03731	0.00357	0.00544
0.10095	0.15776	0.04697	0.03037	0.01169	0.00764	0.00422	0.04398	0.00125	0.02354	0.00113	0.00113	0.00766	0.01284	0.00358	0.03043	0.00347	0.00561
0.11325	0.1609	0.02219	0.02601	0.02425	0.01489	0.00281	0.02046	0.00903	0.01987	0.00183	0.00183	0.02993	0.01844	0.00281	0.02274	0.00538	0.01151
0.11954	0.16853	0.0267	0.02133	0.01875	0.00762	0.00242	0.02553	0.00859	0.01921	0.00437	0.00437	0.02243	0.01549	0.00241	0.01935	0.00211	0.00543
0.12866	0.17474	0.01734	0.02096	0.02098	0.00642	0.00515	0.0158	0.01158	0.0201	0.00566	0.00567	0.02213	0.01464	0.00514	0.03265	0.00174	0.00448
0.11816	0.16869	0.02999	0.02652	0.02136	0.00375	0.00511	0.0285	0.01059	0.02482	0.00793	0.00794	0.02678	0.19747	0.00511	0.01346	0.00352	0.00269
0.11217	0.16928	0.03045	0.03402	0.01913	0.00206	0.00085	0.02596	0.00271	0.02985	0.00218	0.00218	0.00199	0.00723	0.00085	0.0221	0.0007	0.00131
0.06958	0.12715	0.06917	0.01927	0.0133	0.01977	0.01543	0.06451	0.01187	0.01263	0.01107	0.01107	0.01986	0.04778	0.01458	0.05373	0.01559	0.01481
0.09512	0.15377	0.04429	0.01972	0.0063	0.0066	0.004	0.03726	0.00162	0.01579	0.00157	0.00157	0.00622	0.06283	0.00355	0.0378	0.00302	0.00441
0.1084	0.1663	0.02874	0.02265	0.01186	0.00254	0.00116	0.02375	0.00183	0.02012	0.00158	0.00159	0.00223	0.15809	0.00116	0.02485	0.0009	0.00148
0.0907	0.14672	0.04065	0.04559	0.02586	0.02175	0.01482	0.04251	0.0084	0.0328	0.01235	0.01235	0.02216	0.02539	0.01255	0.02364	0.01492	0.01879
0.12032	0.16566	0.02104	0.02299	0.02208	0.02008	0.00457	0.01736	0.0099	0.01599	0.0066	0.00658	0.03274	0.01562	0.00456	0.02851	0.00831	0.01579
0.10573	0.16414	0.03761	0.02014	0.01069	0.00942	0.00792	0.03285	0.00548	0.01602	0.00548	0.00548	0.00935	0.0444	0.00761	0.03402	0.00693	0.00793
0.11191	0.16541	0.03047	0.0441	0.02738	0.00833	0.00375	0.03099	0.00132	0.0317	0.001	0.001	0.04233	0.01531	0.00376	0.00544	0.00427	0.09395
0.05293	0.10871	0.06306	0.03974	0.02136	0.03324	0.02322	0.05965	0.01693	0.02651	0.02071	0.0207	0.034	0.02766	0.01988	0.05475	0.02102	0.02687
0.08878	0.13756	0.03207	0.05054	0.03893	0.04469	0.01529	0.03301	0.01208	0.0367	0.03154	0.03147	0.03909	0.02665	0.0153	0.00531	0.02817	0.03568
0.08371	0.13293	0.04003	0.0384	0.02774	0.03643	0.01294	0.04012	0.00727	0.02676	0.0227	0.02266	0.03332	0.02202	0.01295	0.01092	0.02071	0.02901
0.08153	0.13668	0.05259	0.03159	0.01044	0.01438	0.00913	0.04959	0.00602	0.02176	0.00563	0.00563	0.01465	0.01628	0.00814	0.03158	0.00729	0.01046
0.08699	0.14507	0.04865	0.03084	0.01135	0.0099	0.00563	0.04605	0.00217	0.0236	0.00246	0.00246	0.00992	0.01371	0.00475	0.035	0.0046	0.00719
0.08158	0.14028	0.05712	0.03094	0.01635	0.02217	0.01732	0.058	0.0123	0.02267	0.01346	0.01346	0.05552	0.02388	0.01598	0.04587	0.01542	0.01874
0.09642	0.14805	0.03354	0.04092	0.03198	0.03696	0.0186	0.03356	0.01208	0.02979	0.02356	0.02354	0.03736	0.03398	0.01318	0.01285	0.02495	0.03231
0.10847	0.1582	0.02917	0.02734	0.02114	0.01221	0.00349	0.02748	0.0081	0.02035	0.00232	0.00232	0.02838	0.01758	0.00349	0.0139	0.00407	0.10641
0.11355	0.16018	0.02501	0.02156	0.0201	0.01448	0.00412	0.02287	0.01052	0.01634	0.00235	0.00235	0.02651	0.01701	0.00411	0.02563	0.00462	0.0109
0.11994	0.16712	0.02384	0.02134	0.01985	0.00726	0.00575	0.02183	0.01284	0.02003	0.0069	0.00691	0.02248	0.01438	0.00574	0.02649	0.00311	0.00495
0.12699	0.18345	0.01223	0.02909	0.02042	0.00327	0.00361	0.00926	0.01291	0.02786	0.00416	0.00416	0.04595	0.05359	0.00361	0.0098	0.00296	0.00285
0.10414	0.15599	0.02944	0.0389	0.02579	0.01249	0.00329	0.02847	0.00529	0.02682	0.00143	0.00143	0.01272	0.0183	0.0033	0.01052	0.00508	0.00962
0.12676	0.17146	0.01854	0.02101	0.02117	0.00736	0.00785	0.01591	0.01497	0.01991	0.00668	0.00669	0.02242	0.01373	0.00784	0.03608	0.00285	0.00507
0.08567	0.1431	0.04999	0.03077	0.01054	0.00936	0.0058	0.04681	0.00448	0.02333	0.00369	0.00369	0.05311	0.01279	0.0058	0.03369	0.00456	0.00652
0.0905	0.14541	0.04223	0.03968	0.01813	0.01035	0.00502	0.04044	0.00559	0.02829	0.00316	0.00316	0.04788	0.01494	0.00422	0.02134	0.00426	0.00739
0.10368	0.1521	0.0311	0.02744	0.02155	0.01311	0.00607	0.02835	0.01213	0.01995	0.00493	0.00494	0.02846	0.01603	0.00607	0.02195	0.00512	0.00944
0.12165	0.16984	0.02366	0.02111	0.01964	0.00789	0.00273	0.02239	0.00923	0.01921	0.00427	0.00428	0.02256	0.01574	0.00273	0.02237	0.00206	0.00567
0.11207	0.16856	0.04199	0.02987	0.01304	0.00582	0.00354	0.03749	0.00036	0.02391	0.00043	0.00043	0.00584	0.01132	0.00354	0.02743	0.00297	0.00442
0.11727	0.1746	0.02286	0.03481	0.02202	0.00354	0.00261	0.02013	0.00085	0.0306	0.00115	0.00115	0.00355	0.00763	0.00242	0.01887	0.00236	0.00288
0.12052	0.17241	0.02587	0.0368	0.02885	0.00199	0.00451	0.02428	0.00812	0.03231	0.00661	0.00662	0.00199	0.00843	0.0045	0.00923	0.003	0.00194
0.11878	0.16972	0.02553	0.031	0.02604	0.00532	0.00164	0.02503	0.00666	0.0267	0.00368	0.00369	0.03142	0.19615	0.00164	0.01252	0.00138	0.00376
0.1179	0.16955	0.02366	0.0373	0.03006	0.00914	0.0032	0.02427	0.00207	0.02883	0.00104	0.00103	0.03586	0.01678	0.00187	0.00893	0.00456	0.10643
0.07843	0.13297	0.052	0.03818	0.02	0.03031	0.01985	0.05112	0.01255	0.02529	0.01734	0.01733	0.04837	0.02887	0.0168	0.03306	0.01916	0.0764
0.08072	0.13411	0.04769	0.03455	0.01499	0.02007	0.01082	0.04475	0.00583	0.02229	0.00762	0.00761	0.02048	0.02007	0.00911	0.02794	0.00959	0.01526
0.09133	0.14484	0.04034	0.04014	0.01969	0.01029	0.00554	0.03776	0.00907	0.02762	0.00566	0.00566	0.04238	0.01449	0.00554	0.01948	0.00475	0.00726
0.08412	0.1367	0.04669	0.03158	0.01444	0.02044	0.01067	0.04383	0.0056	0.02005	0.00743	0.00743	0.02084	0.02039	0.00901	0.02638	0.00955	0.01561
0.12335	0.16772	0.01998	0.03261	0.02241	0.02432	0.01086	0.02064	0.00502	0.02166	0.01627	0.01622	0.02076	0.02211	0.01086	0.00792	0.01447	0.01817
0.12353	0.16782	0.02434	0.02765	0.01987	0.02099	0.0128	0.02507	0.00809	0.01781	0.02765	0.01338	0.01943	0.02293	0.0128	0.01296	0.01259	0.01642
0.11222	0.15358	0.01192	0.04339	0.03731	0.04277	0.01161	0.01143	0.0107	0.04339	0.02939	0.02934	0.05152	0.03064	0.01023	0.00059	0.02826	0.03383
0.11984	0.1566	0.01628	0.05566	0.04891	0.0539	0.00864	0.01397	0.0154	0.03908	0.03741	0.03733	0.0623	0.02686	0.00865	0.00488	0.03475	0.03746
0.13202	0.16519	0.01123	0.04445	0.03822	0.03314	0.00299	0.00847	0.01849	0.04445	0.02216	0.0221	0.04502	0.01634	0.00299	0.00067	0.0222	0.02273
0.07113	0.11323	0.05692	0.06895	0.05656	0.07225	0.04491	0.0588	0.04294	0.05535	0.0577	0.05766	0.06896	0.05495	0.04493	0.03875	0.05456	0.06195
0.08921	0.14719	0.05295	0.02609	0.00785	0.01062	0.00663	0.04963	0.00278	0.01956	0.00283	0.00283	0.04989	0.01407	0.00584	0.03918	0.00521	0.00778
0.07655	0.12928	0.05273	0.0306	0.01462	0.02324	0.01397	0.0491	0.00884	0.01924	0.01071	0.0107	0.02378	0.0212	0.01204	0.03382	0.0122	0.0178
0.09164	0.1449	0.03619	0.04166	0.02295	0.01801	0.00717	0.03489	0.00215	0.02746	0.00535	0.00534	0.01833	0.02101	0.0047	0.01565	0.00874	0.01426
0.09294	0.14654	0.03317	0.04617	0.02664	0.01892	0.00802	0.03262	0.00104	0.03095	0.00697	0.00696	0.01928	0.02238	0.00494	0.0127	0.01021	0.01544
0.09367	0.14811	0.03763	0.04333	0.02239	0.01322	0.00555	0.03703	0.00241	0.03024	0.00259	0.00258	0.01345	0.01809	0.00555	0.01796	0.00615	0.08279
0.09764	0.15346	0.03906	0.04148	0.02096	0.00907	0.00414	0.03858	0.00199	0.03136	0.00104	0.00104	0.05388	0.01479	0.00414	0.01991	0.00418	0.00689
0.09866	0.15475	0.04378	0.03632	0.01635	0.0097	0.00521	0.04314	0.00092	0.02715	0.00151	0.00151	0.04831	0.01513	0.00521	0.02436	0.00474	0.00744
0.0956	0.15063	0.04421	0.03623	0.01576	0.01113	0.00539	0.04361	0.0023	0.02568	0.00194	0.00194	0.04266	0.0162	0.00427	0.02175	0.0049	0.00836
0.09734	0.15057	0.03765	0.0374	0.02043	0.01716	0.00814	0.03736	0.00127	0.02502	0.00537	0.00536	0.01748	0.02137	0.00815	0.01369	0.00888	0.01379
0.11468	0.16093	0.02453	0.02135	0.02053	0.01508	0.00418	0.02171	0.01065	0.01618	0.00235	0.00234	0.02714	0.01693	0.00417	0.01712	0.00489	0.01144
0.12682	0.17189	0.01676	0.02328	0.01938	0.0251	0.00178	0.01427	0.00535	0.01646	0.01249	0.01247	0.03472	0.01717	0.00178	0.01369	0.01296	0.02022
0.08421	0.13854	0.04508	0.03742	0.01665	0.01887	0.00953	0.0433	0.00352	0.0247	0.0063	0.00629	0.01921	0.02065	0.00746	0.02441	0.00927	0.01469
0.09288	0.14671	0.03442	0.04555	0.02549	0.01753	0.00752	0.03389	0.00104	0.03082	0.00583	0.00582	0.0475	0.02138	0.00477	0.01357	0.0092	0.01415
0.12042	0.16777	0.02167	0.02593	0.02459	0.00521	0.00853	0.01941	0.0154	0.02503	0.00943	0.00944	0.02642	0.0125	0.00852	0.02942	0.00455	0.00369
0.13127	0.1758	0.01817	0.02262	0.02182	0.00424	0.01092	0.01558	0.01744	0.023	0.01137	0.01137	0.02161	0.01116	0.01092	0.03998	0.00582	0.00324
0.10878	0.16052	0.02898	0.03839	0.02626	0.00632	0.00318	0.02762	0.00899	0.02931	0.005	0.00501	0.00643	0.01369	0.00317	0.01031	0.00221	0.00432
0.10736	0.16505	0.03443	0.03101	0.01614	0.0038	0.00186	0.02973	0.00148	0.0266	0.00096	0.00096	0.00374	0.00875	0.00186	0.02687	0.00164	0.00268
0.11369	0.17106	0.03348	0.02435	0.01127	0.00307	0.00153	0.02781	0.00142	0.0212	0.0013	0.0013	0.00291	0.05324	0.00153	0.02716	0.0012	0.00202
0.10308	0.16081	0.03912	0.02744	0.01225	0.00339	0.00214	0.03277	0.00429	0.02382	0.00385	0.00385	0.0032	0.00772	0.00214	0.02998	0.0019	0.00219
0.05001	0.10147	0.0184	0.01831	0.01175	0.00406	0.0021	0.01617	0.00075	0.01502	0.00087	0.00087	0.00359	0.05254	0.00099	0.02183	0.0019	0.0215
0.09172	0.1501	0.04964	0.02175	0.00595	0.00714	0.0046	0.04271	0.00298	0.01723	0.00292	0.00292	0.04716	0.04884	0.00428	0.0397	0.00347	0.00471
0.08451	0.13573	0.04576	0.03997	0.02849	0.04186	0.0229	0.0445	0.0161	0.02908	0.02693	0.02692	0.04202	0.03393	0.01768	0.02757	0.02726	0.03578
0.08263	0.1346	0.0424	0.0527	0.03413	0.04229	0.02379	0.04184	0.01777	0.03531	0.02856	0.02854	0.04273	0.03635	0.01742	0.02622	0.02914	0.03685
0.08087	0.13947	0.05566	0.02819	0.01168	0.01712	0.01217	0.05478	0.00712	0.02027	0.00806	0.00805	0.01726	0.01918	0.01217	0.04304	0.01037	0.01365
0.08302	0.13906	0.04693	0.03991	0.0202	0.02268	0.01459	0.04741	0.00775	0.02757	0.01163	0.01162	0.02308	0.02461	0.01216	0.02883	0.01415	0.01888
0.11674	0.16283	0.01782	0.04486	0.03727	0.04244	0.00721	0.01776	0.00715	0.03426	0.02979	0.02974	0.05733	0.02444	0.00216	0.00421	0.0276	0.03464
0.11701	0.16288	0.02032	0.0509	0.0425	0.04911	0.01144	0.02033	0.01302	0.0401	0.03616	0.0361	0.06365	0.02827	0.00544	0.00287	0.03347	0.04017
0.14842	0.19171	0.00915	0.03778	0.02758	0.02373	0.00294	0.00908	0.00042	0.02743	0.03778	0.01709	0.03822	0.01007	0.00294	0.00761	0.01484	0.01643
0.14838	0.19148	0.01097	0.03393	0.02428	0.01928	0.0048	0.01091	0.00234	0.0239	0.014	0.01394	0.03405	0.01094	0.00479	0.00993	0.01161	0.01333
0.14384	0.18706	0.00885	0.03844	0.02817	0.02413	0.0035	0.00914	0.00176	0.02727	0.03844	0.01725	0.03863	0.01301	0.0035	0.00428	0.01504	0.01675
0.09384	0.15194	0.0607	0.0158	0.01096	0.01509	0.01206	0.05357	0.00912	0.01122	0.0081	0.0081	0.01481	0.05846	0.01156	0.05204	0.00984	0.01191
0.08361	0.13789	0.04696	0.03975	0.02152	0.02864	0.01794	0.04665	0.01047	0.02625	0.01596	0.01595	0.02917	0.02849	0.01795	0.02702	0.01809	0.02412
0.07718	0.13224	0.04942	0.04368	0.02396	0.03146	0.02093	0.04939	0.01389	0.03013	0.01927	0.01926	0.03205	0.03038	0.01735	0.03275	0.02098	0.02681
0.0649	0.12415	0.0586	0.0309	0.01449	0.02286	0.01642	0.05703	0.01097	0.0218	0.01262	0.01261	0.02314	0.02209	0.01438	0.04677	0.0142	0.01826
0.07992	0.13205	0.0434	0.04066	0.02351	0.03169	0.01446	0.04156	0.00732	0.02505	0.01655	0.01653	0.03194	0.02615	0.01448	0.02783	0.01775	0.02592
0.1004	0.15396	0.03931	0.03708	0.01874	0.01072	0.00431	0.03872	0.00373	0.02553	0.00159	0.00158	0.01089	0.01649	0.00432	0.0146	0.00433	0.08531
0.11495	0.16898	0.03498	0.0382	0.02212	0.00623	0.00292	0.03457	0.00151	0.02835	0.0003	0.0003	0.03774	0.01308	0.00228	0.01029	0.00295	0.0048
0.09597	0.15183	0.04802	0.03379	0.01463	0.01518	0.0099	0.04877	0.00404	0.02391	0.00582	0.00581	0.04248	0.01962	0.0087	0.02715	0.00888	0.07182
0.10859	0.15714	0.02412	0.02701	0.02402	0.02327	0.00513	0.0228	0.00299	0.01932	0.00919	0.00918	0.03601	0.02288	0.00514	0.01754	0.0118	0.01908
0.11156	0.1597	0.02599	0.02227	0.01909	0.01961	0.00466	0.02454	0.00439	0.0159	0.00556	0.00555	0.0299	0.02138	0.00292	0.01952	0.00891	0.01574
0.11613	0.16286	0.02135	0.02186	0.02051	0.01963	0.00296	0.01985	0.00631	0.01604	0.00562	0.00561	0.03054	0.02013	0.00297	0.02303	0.00869	0.01575
0.07987	0.13361	0.04884	0.04172	0.02335	0.0333	0.02094	0.04796	0.01351	0.02726	0.01994	0.01993	0.03388	0.03093	0.01713	0.03032	0.0215	0.02821
0.08425	0.13846	0.04024	0.04876	0.02913	0.03047	0.01809	0.04057	0.01095	0.03305	0.01827	0.01826	0.03105	0.03043	0.01375	0.02234	0.02026	0.02625
0.08868	0.14384	0.04304	0.04013	0.01946	0.01864	0.01056	0.04309	0.00353	0.02754	0.00749	0.00748	0.01898	0.02189	0.01057	0.02382	0.01054	0.01515
0.07896	0.13576	0.04539	0.04206	0.0213	0.02155	0.01355	0.04564	0.00689	0.03004	0.01089	0.01088	0.02193	0.02347	0.01091	0.02985	0.01336	0.01785
0.13089	0.17582	0.01336	0.02495	0.02602	0.00582	0.0078	0.01119	0.01313	0.02384	0.00615	0.00616	0.02616	0.01376	0.0078	0.03901	0.00192	0.00402
0.14349	0.18586	0.0127	0.01638	0.01717	0.00821	0.00869	0.0102	0.01368	0.0152	0.00349	0.0035	0.02027	0.01153	0.00868	0.05048	0.00138	0.00605
0.13162	0.17573	0.01406	0.01717	0.01736	0.01593	0.00243	0.01238	0.00865	0.01349	0.00303	0.00302	0.02519	0.01729	0.00242	0.01026	0.00636	0.01267
0.13292	0.17685	0.01421	0.01649	0.01733	0.01224	0.00348	0.01281	0.01005	0.01404	0.00087	0.00087	0.02206	0.01642	0.00348	0.01026	0.00381	0.00945
0.11526	0.16778	0.02997	0.03838	0.02582	0.00326	0.00242	0.02902	0.00682	0.03056	0.00482	0.00483	0.0368	0.18742	0.00242	0.00685	0.00154	0.00211
0.10039	0.15812	0.04538	0.02643	0.00973	0.0059	0.00321	0.03974	0.00191	0.02147	0.00163	0.00164	0.00578	0.05676	0.00279	0.03418	0.00246	0.00404
0.0822	0.13904	0.05085	0.03346	0.0124	0.01548	0.00917	0.04966	0.00369	0.02382	0.00509	0.00508	0.05124	0.01812	0.00768	0.03275	0.00791	0.01186
0.08061	0.13935	0.05887	0.02011	0.00734	0.01329	0.0093	0.05409	0.00568	0.01438	0.00534	0.00534	0.01313	0.05452	0.0085	0.04778	0.00708	0.00964
0.06136	0.11903	0.05954	0.03425	0.01586	0.02605	0.01792	0.05679	0.01184	0.02334	0.01434	0.01433	0.02653	0.02368	0.01543	0.04518	0.01567	0.02071
0.07916	0.1329	0.04994	0.03346	0.01414	0.02117	0.01184	0.04707	0.00602	0.02146	0.00835	0.00834	0.0216	0.02084	0.01014	0.02985	0.01042	0.01625
0.11844	0.16381	0.02341	0.02116	0.02088	0.01182	0.00646	0.01995	0.01362	0.01747	0.00386	0.00387	0.02506	0.01498	0.00645	0.03101	0.00359	0.00862
0.11355	0.15926	0.02829	0.02136	0.02016	0.01137	0.00794	0.02395	0.01493	0.01798	0.00619	0.0062	0.01147	0.01427	0.00794	0.03043	0.00456	0.00804
0.11704	0.16992	0.0345	0.03308	0.02082	0.00276	0.00246	0.03305	0.00649	0.02705	0.00516	0.00516	0.00278	0.18939	0.00246	0.00988	0.00183	0.00181
0.10006	0.15628	0.04842	0.03119	0.01195	0.01034	0.00626	0.04739	0.00139	0.02299	0.00213	0.00213	0.0428	0.01546	0.00545	0.02882	0.0053	0.00798
0.10506	0.16223	0.04325	0.01987	0.00694	0.00469	0.00478	0.03384	0.0068	0.01821	0.00704	0.00704	0.00426	0.04849	0.00478	0.03281	0.00461	0.00406
0.09228	0.15062	0.05123	0.01914	0.00476	0.0077	0.00501	0.04357	0.00288	0.0149	0.00271	0.00271	0.04465	0.06032	0.00466	0.04159	0.00369	0.00507
0.0936	0.14584	0.03994	0.03283	0.01736	0.01674	0.00705	0.038	0.0041	0.02125	0.0041	0.0041	0.01704	0.01955	0.00706	0.01814	0.00717	0.01279
0.10061	0.15309	0.03288	0.03849	0.02355	0.01544	0.00575	0.03221	0.00251	0.02601	0.00357	0.00357	0.01573	0.02027	0.00576	0.01052	0.00734	0.01225
0.10793	0.16043	0.03685	0.03324	0.01906	0.00645	0.00277	0.03581	0.00713	0.02514	0.00464	0.00464	0.03241	0.01342	0.00278	0.01115	0.00239	0.00441
0.12454	0.17142	0.01959	0.02088	0.02063	0.00888	0.00316	0.01822	0.00989	0.01886	0.00359	0.00359	0.02272	0.01626	0.00315	0.02828	0.00223	0.00653
0.14053	0.18368	0.00896	0.01666	0.01761	0.01301	0.00296	0.00776	0.00785	0.01388	0.00138	0.00137	0.0228	0.01677	0.00296	0.00684	0.00511	0.01037
0.12498	0.16986	0.0184	0.01888	0.01784	0.02016	0.00216	0.01592	0.00745	0.0131	0.00664	0.00662	0.02912	0.01763	0.00216	0.02944	0.00888	0.01613
0.10665	0.15995	0.0396	0.0333	0.01762	0.01167	0.0059	0.04021	0.00087	0.02302	0.00202	0.00201	0.03207	0.01787	0.00472	0.01218	0.00573	0.08995
0.10172	0.15514	0.04471	0.03104	0.01365	0.00683	0.00449	0.04257	0.00828	0.02363	0.00684	0.00684	0.03291	0.01214	0.00449	0.01909	0.00407	0.00481
0.11088	0.16545	0.03945	0.03518	0.01768	0.0039	0.00186	0.03724	0.00498	0.02755	0.0039	0.0039	0.00391	0.01056	0.00186	0.01636	0.0015	0.00256
0.10884	0.16599	0.04242	0.02136	0.00679	0.00379	0.0024	0.03454	0.00325	0.01845	0.00338	0.00339	0.00349	0.0079	0.0024	0.03254	0.00181	0.00234
0.03386	0.08538	0.08308	0.02062	0.00977	0.01824	0.00904	0.06459	0.00529	0.01114	0.00455	0.00454	0.01851	0.0092	0.00792	0.05478	0.00434	0.00929
0.09615	0.14746	0.03503	0.0329	0.02071	0.01806	0.00628	0.03308	0.00459	0.02164	0.00447	0.00446	0.01834	0.02029	0.00475	0.01725	0.00779	0.01403
0.09114	0.14933	0.04733	0.03131	0.01278	0.01061	0.00665	0.04522	0.00196	0.02414	0.00297	0.00297	0.05527	0.01478	0.00571	0.03541	0.00575	0.00819
0.09301	0.15179	0.04827	0.01806	0.00606	0.00881	0.00597	0.04118	0.00283	0.01382	0.00263	0.00263	0.00843	0.01153	0.00544	0.04172	0.00466	0.00629
0.09512	0.15362	0.03726	0.01721	0.00622	0.00473	0.0028	0.03017	0.00253	0.01449	0.00247	0.00247	0.03972	0.14318	0.00262	0.03199	0.00213	0.0027
0.10082	0.15931	0.04156	0.01843	0.0075	0.00787	0.00576	0.03528	0.00297	0.01456	0.00288	0.00288	0.00761	0.04309	0.00537	0.0364	0.00475	0.00599
0.09371	0.15146	0.04738	0.03152	0.01268	0.01013	0.0062	0.04532	0.00155	0.02422	0.00245	0.00245	0.05351	0.01459	0.00532	0.03364	0.00533	0.00777
0.10782	0.16432	0.04042	0.03504	0.0171	0.00686	0.00407	0.03788	0.00029	0.02772	0.00089	0.00089	0.00692	0.01254	0.00351	0.02466	0.00364	0.00533
0.11549	0.17	0.03613	0.03711	0.02057	0.00529	0.00244	0.0348	0.00167	0.0281	0.0007	0.00071	0.03804	0.01194	0.00244	0.01371	0.00237	0.004
0.11983	0.17682	0.02566	0.0194	0.00956	0.00171	0.00097	0.02085	0.00241	0.01776	0.00241	0.00241	0.00126	0.07634	0.00097	0.02144	0.00092	0.00088
0.08878	0.14545	0.05215	0.02355	0.0087	0.00515	0.00677	0.04255	0.00995	0.02188	0.01005	0.01005	0.04626	0.05285	0.00677	0.03544	0.00624	0.00448
0.11141	0.16852	0.03362	0.02588	0.01255	0.00285	0.00371	0.02664	0.00612	0.02383	0.00587	0.00587	0.00264	0.05428	0.00371	0.02551	0.00331	0.0027
0.11049	0.16692	0.02924	0.03798	0.02257	0.00346	0.00504	0.02393	0.00779	0.03453	0.007	0.00701	0.00344	0.00497	0.00503	0.01823	0.0041	0.00336
0.10181	0.15982	0.04292	0.01511	0.00363	0.00577	0.00343	0.03472	0.00174	0.01226	0.00165	0.00165	0.00508	0.06524	0.00318	0.03564	0.00245	0.00348
0.11441	0.17115	0.02132	0.01186	0.006	0.00257	0.00108	0.01722	0.00208	0.011	0.00215	0.00215	0.0288	0.15473	0.00108	0.01791	0.00104	0.00096
0.11433	0.17165	0.03023	0.01404	0.00508	0.00368	0.00197	0.02478	0.00065	0.01212	0.0008	0.0008	0.00301	0.0066	0.00197	0.02556	0.00144	0.0021
0.09716	0.15109	0.04161	0.03643	0.02081	0.02173	0.01359	0.04285	0.00637	0.02431	0.01065	0.01065	0.02216	0.02535	0.0136	0.0173	0.0136	0.01835
0.11609	0.16298	0.0223	0.02153	0.02037	0.01698	0.00284	0.02068	0.00751	0.0163	0.00314	0.00313	0.02826	0.01929	0.00285	0.02355	0.00675	0.01337
0.10572	0.15763	0.03346	0.03365	0.02116	0.01147	0.00368	0.0327	0.0048	0.02354	0.00138	0.00138	0.01168	0.01761	0.00368	0.01034	0.00449	0.09332
0.10886	0.16358	0.03702	0.03896	0.02067	0.00383	0.00177	0.03506	0.00538	0.03064	0.00397	0.00397	0.00385	0.0105	0.00177	0.01514	0.00148	0.00252
0.08435	0.13857	0.04892	0.03321	0.01468	0.0216	0.01242	0.04747	0.00525	0.02126	0.00873	0.00872	0.02199	0.02268	0.01024	0.02717	0.01152	0.01718
0.08335	0.13845	0.04984	0.03366	0.01258	0.01691	0.00945	0.04803	0.00412	0.02276	0.00545	0.00544	0.04282	0.01905	0.00945	0.0288	0.00816	0.07321
0.09228	0.14711	0.04005	0.04161	0.02046	0.01398	0.00656	0.03962	0.00148	0.02916	0.00333	0.00332	0.01421	0.01852	0.00476	0.01876	0.00681	0.01091
0.10955	0.16487	0.03463	0.03993	0.02203	0.00248	0.00299	0.03122	0.00657	0.0333	0.0054	0.0054	0.00246	0.00814	0.00299	0.01628	0.00231	0.00176
0.09755	0.14823	0.03216	0.03252	0.02253	0.02024	0.00615	0.0303	0.00406	0.02153	0.00607	0.00606	0.02048	0.02135	0.00616	0.01703	0.00924	0.01603
0.10425	0.15632	0.03055	0.03902	0.02505	0.01123	0.00306	0.02957	0.00572	0.02701	0.00135	0.00135	0.01144	0.01737	0.00228	0.01035	0.00429	0.09794
0.11325	0.1609	0.02219	0.02601	0.02425	0.01489	0.00281	0.02046	0.00903	0.01987	0.00183	0.00183	0.02993	0.01844	0.00281	0.02274	0.00538	0.01151
0.0946	0.15322	0.04144	0.0165	0.00503	0.0061	0.00362	0.03401	0.00171	0.01326	0.00162	0.00162	0.04006	0.06302	0.00327	0.03567	0.00265	0.00376
0.10538	0.1627	0.0253	0.01283	0.00606	0.00338	0.00149	0.02068	0.00109	0.01121	0.00111	0.00111	0.0023	0.14484	0.00149	0.02176	0.00107	0.00154
0.10344	0.16172	0.03269	0.02134	0.0102	0.0042	0.00241	0.02736	0.0006	0.01821	0.00051	0.00051	0.00392	0.04461	0.00208	0.02872	0.00195	0.00284
0.08704	0.13508	0.04513	0.03949	0.02868	0.04487	0.01882	0.04379	0.01344	0.02961	0.02959	0.02957	0.04226	0.02811	0.01884	0.0169	0.02773	0.03722
0.10365	0.15996	0.04729	0.02979	0.01117	0.00724	0.00391	0.04432	0.00149	0.02295	0.0011	0.0011	0.00726	0.01269	0.00391	0.02892	0.00315	0.00527
0.09954	0.15605	0.04567	0.03335	0.01394	0.00869	0.00475	0.04405	0.00104	0.02538	0.00118	0.00118	0.04794	0.014	0.00396	0.02763	0.00411	0.00653
0.10273	0.15269	0.03291	0.02793	0.01967	0.0141	0.00487	0.03074	0.00804	0.0193	0.00294	0.00294	0.01432	0.01785	0.00488	0.01788	0.00505	0.01049
0.1048	0.1542	0.03096	0.02761	0.02075	0.01305	0.00454	0.02871	0.00951	0.01985	0.0033	0.0033	0.02848	0.01712	0.00454	0.01809	0.00455	0.00958
0.12086	0.1664	0.016	0.04266	0.03104	0.02986	0.00803	0.01669	0.00387	0.0296	0.02207	0.02199	0.04694	0.01948	0.00803	0.00233	0.0188	0.02191
0.12455	0.17034	0.01754	0.0423	0.0309	0.03258	0.00566	0.01796	0.00316	0.03067	0.02363	0.0423	0.04859	0.01592	0.00566	0.03102	0.01986	0.02375
0.1217	0.1677	0.01918	0.04119	0.02983	0.03192	0.00674	0.01966	0.00309	0.02951	0.02314	0.02306	0.04774	0.0169	0.00674	0.00457	0.01936	0.02351
0.08	0.12912	0.04604	0.03914	0.02764	0.03809	0.01571	0.04383	0.01001	0.02658	0.02278	0.02276	0.03688	0.02577	0.01572	0.02336	0.02184	0.03104
0.05833	0.11119	0.06442	0.04144	0.02474	0.03726	0.02391	0.05942	0.01732	0.02578	0.02357	0.02356	0.03807	0.02948	0.02036	0.05019	0.02331	0.03027
0.06008	0.09265	0.07203	0.07298	0.05889	0.08127	0.05545	0.07404	0.05385	0.06298	0.06616	0.06613	0.07949	0.06005	0.04491	0.06041	0.06229	0.06915
0.08112	0.11953	0.05417	0.08876	0.07495	0.09014	0.0423	0.05352	0.0525	0.07503	0.07501	0.07489	0.08117	0.06229	0.03045	0.04476	0.07106	0.07753
0.06745	0.10383	0.06325	0.07941	0.06418	0.08192	0.05068	0.06479	0.05144	0.06446	0.0671	0.06706	0.07848	0.06068	0.03857	0.05151	0.06324	0.07089
0.07317	0.10437	0.06681	0.08639	0.07133	0.08974	0.05465	0.06776	0.05956	0.07276	0.07541	0.07536	0.08687	0.06822	0.04079	0.05675	0.07172	0.0785
0.10275	0.16026	0.04178	0.02842	0.01204	0.00413	0.00231	0.03596	0.00356	0.02399	0.00309	0.0031	0.004	0.06958	0.00231	0.03066	0.0018	0.00264
0.09988	0.15028	0.03428	0.02755	0.01881	0.01844	0.00626	0.03236	0.00451	0.01854	0.0045	0.00449	0.01869	0.02052	0.00478	0.01723	0.00789	0.10162
0.09804	0.15143	0.04074	0.03647	0.01767	0.00868	0.00431	0.03893	0.00742	0.02579	0.00476	0.00476	0.03755	0.01414	0.00431	0.017	0.00367	0.00602
0.10284	0.15986	0.04241	0.03162	0.01388	0.00469	0.00233	0.03796	0.00346	0.02606	0.00276	0.00276	0.00464	0.01004	0.00233	0.0296	0.00182	0.00312
0.10993	0.16169	0.03962	0.02781	0.01673	0.00529	0.00683	0.03719	0.01188	0.02456	0.01019	0.0102	0.00534	0.01029	0.00682	0.01406	0.00577	0.00434
0.10767	0.16359	0.04918	0.01916	0.00868	0.0068	0.00779	0.03773	0.0098	0.018	0.01051	0.01051	0.00645	0.00757	0.00779	0.03418	0.00755	0.00659
0.09344	0.14881	0.04817	0.03243	0.012	0.00858	0.00512	0.04587	0.00574	0.0239	0.00455	0.00456	0.04283	0.01307	0.00458	0.02638	0.00403	0.00594
0.09019	0.14785	0.04798	0.03389	0.01449	0.01346	0.00879	0.04755	0.00348	0.02538	0.00502	0.00501	0.0136	0.01749	0.00762	0.03325	0.00783	0.01076
0.09729	0.15327	0.04373	0.03719	0.01696	0.01126	0.00632	0.04363	0.00096	0.02737	0.00256	0.00255	0.04811	0.01648	0.00519	0.02385	0.00584	0.00881
0.09934	0.15474	0.04505	0.03393	0.01415	0.00687	0.00358	0.0431	0.0049	0.02577	0.00365	0.00365	0.04337	0.01243	0.00358	0.02528	0.00283	0.0047
0.10361	0.15838	0.03247	0.04625	0.02641	0.00487	0.00174	0.03129	0.00548	0.03609	0.00323	0.00324	0.05461	0.0116	0.00174	0.0125	0.00159	0.00335
0.10916	0.16313	0.03062	0.0459	0.02739	0.00312	0.00249	0.02912	0.00669	0.03587	0.00474	0.00475	0.04845	0.17722	0.00249	0.00932	0.00166	0.00202
0.08942	0.14846	0.04861	0.01591	0.00622	0.00997	0.00707	0.04135	0.00409	0.01182	0.0038	0.0038	0.04076	0.05942	0.00652	0.04302	0.00559	0.00718
0.10375	0.16159	0.0344	0.01104	0.00464	0.00651	0.00435	0.02846	0.00233	0.00857	0.00195	0.00195	0.00559	0.06962	0.00409	0.02951	0.00342	0.00427
0.09418	0.15321	0.04635	0.02281	0.01047	0.01082	0.00827	0.04138	0.00489	0.01771	0.00514	0.00514	0.01074	0.04732	0.00769	0.04119	0.00709	0.00871
0.09467	0.15367	0.03866	0.02368	0.01104	0.0073	0.00504	0.0337	0.00185	0.01926	0.00231	0.00231	0.04757	0.01086	0.0045	0.035	0.0043	0.00559
0.08978	0.14556	0.05399	0.02723	0.00838	0.00946	0.0066	0.05012	0.00726	0.02056	0.00682	0.00683	0.04165	0.01228	0.00642	0.03294	0.00559	0.00687
0.09913	0.15589	0.04281	0.03528	0.01602	0.00709	0.00341	0.04065	0.00222	0.0277	0.00119	0.00119	0.05266	0.01257	0.00341	0.02633	0.00301	0.00516
0.1105	0.16811	0.03202	0.02843	0.01482	0.00276	0.00122	0.02693	0.00194	0.02491	0.00157	0.00157	0.00264	0.05611	0.00122	0.02579	0.00101	0.00181
0.10284	0.15986	0.04241	0.03162	0.01388	0.00469	0.00233	0.03796	0.00346	0.02606	0.00276	0.00276	0.00464	0.01004	0.00233	0.0296	0.00182	0.00312
0.09761	0.15287	0.03654	0.04448	0.02362	0.00999	0.00435	0.03641	0.00203	0.03298	0.00132	0.00131	0.01014	0.01581	0.00298	0.01639	0.00473	0.08227
0.11207	0.16967	0.02964	0.01894	0.00872	0.0029	0.00142	0.02435	0.00133	0.0167	0.00131	0.00131	0.00249	0.04376	0.00142	0.02527	0.00105	0.00168
0.13035	0.18641	0.01727	0.01473	0.00834	0.00214	0.0023	0.01372	0.01683	0.01416	0.00346	0.00346	0.00189	0.03884	0.0023	0.01412	0.00205	0.00182
0.12262	0.17935	0.0259	0.01813	0.00831	0.00175	0.00097	0.02104	0.02483	0.01659	0.00239	0.0024	0.00126	0.04538	0.00097	0.02149	0.00091	0.00088
0.11109	0.16681	0.03911	0.03615	0.01827	0.00622	0.00341	0.03702	0.00073	0.02812	0.00035	0.00035	0.00627	0.0123	0.00287	0.02045	0.00311	0.00478
0.12479	0.17399	0.02085	0.02531	0.02438	0.00606	0.0018	0.02019	0.00712	0.02317	0.0035	0.0035	0.0262	0.0148	0.0018	0.02116	0.0015	0.00439
0.09111	0.15004	0.04381	0.02588	0.01031	0.00711	0.00413	0.03868	0.00131	0.02082	0.00146	0.00146	0.00694	0.05043	0.00349	0.03694	0.00334	0.00502
0.08668	0.14516	0.04312	0.03553	0.01652	0.01044	0.0061	0.04161	0.00126	0.02788	0.00279	0.00279	0.01052	0.01465	0.00491	0.0325	0.00559	0.00807
0.1002	0.15639	0.04358	0.03551	0.01589	0.00818	0.00412	0.04226	0.00165	0.02706	0.00103	0.00103	0.04845	0.01378	0.00413	0.02544	0.00369	0.0061
0.11182	0.16601	0.03758	0.03647	0.01943	0.00357	0.00179	0.03566	0.0055	0.0285	0.00425	0.00426	0.00358	0.0104	0.00179	0.01529	0.00148	0.00232
0.11717	0.17385	0.03258	0.03004	0.01528	0.00212	0.00091	0.02731	0.0024	0.02607	0.00213	0.00213	0.04675	0.00727	0.00091	0.02332	0.00071	0.00134
0.09854	0.15719	0.03646	0.02038	0.00911	0.00611	0.00409	0.03094	0.00129	0.01672	0.0015	0.0015	0.00585	0.06616	0.00367	0.03257	0.00338	0.00446
0.10361	0.15838	0.03247	0.04625	0.02641	0.00487	0.00174	0.03129	0.00548	0.03609	0.00323	0.00324	0.05461	0.0116	0.00174	0.0125	0.00159	0.00335
0.10495	0.15735	0.0325	0.03893	0.02372	0.00872	0.00283	0.03146	0.00671	0.02764	0.00286	0.00287	0.03681	0.01539	0.00283	0.01034	0.00289	0.00632
0.10802	0.15942	0.02716	0.03841	0.0273	0.00857	0.00239	0.0259	0.00816	0.0284	0.00321	0.00322	0.00872	0.01558	0.00239	0.01217	0.00262	0.0973
0.09615	0.14746	0.03503	0.0329	0.02071	0.01806	0.00628	0.03308	0.00459	0.02164	0.00447	0.00446	0.01834	0.02029	0.00475	0.01725	0.00779	0.01403
0.08959	0.1481	0.05298	0.02018	0.00553	0.00917	0.00595	0.04645	0.00313	0.01531	0.0029	0.0029	0.04619	0.05924	0.00541	0.04319	0.00441	0.00634
0.08384	0.14315	0.04763	0.02965	0.01268	0.01216	0.0082	0.04537	0.00361	0.02285	0.00474	0.00474	0.01219	0.01542	0.00711	0.03977	0.00715	0.00955
0.1037	0.1613	0.04876	0.00944	0.00613	0.00867	0.00592	0.03927	0.00382	0.00672	0.00266	0.00266	0.0077	0.06475	0.00564	0.04007	0.00435	0.00567
0.08951	0.14748	0.05228	0.02207	0.00631	0.00771	0.00555	0.045	0.00565	0.01772	0.00561	0.00561	0.0075	0.06016	0.00527	0.03958	0.00464	0.00544
0.13042	0.17991	0.01767	0.02973	0.02983	0.00213	0.00574	0.01629	0.0087	0.02941	0.00725	0.00725	0.02994	0.0087	0.00574	0.00684	0.00348	0.00217
0.1272	0.18345	0.02618	0.01764	0.00734	0.00162	0.001	0.02125	0.00234	0.01611	0.00254	0.00254	0.00118	0.00495	0.001	0.02141	0.00097	0.00085
0.11417	0.16821	0.03174	0.0417	0.02484	0.00221	0.00378	0.02898	0.00738	0.03378	0.00614	0.00614	0.04263	0.18125	0.00378	0.01043	0.00279	0.00195
0.11482	0.17219	0.02999	0.01771	0.00753	0.00295	0.00147	0.02458	0.00121	0.0156	0.00129	0.00129	0.0025	0.00644	0.00147	0.02534	0.00107	0.00169
0.09328	0.15183	0.0471	0.02602	0.00955	0.00832	0.00514	0.04236	0.00151	0.02049	0.00175	0.00175	0.00823	0.05328	0.00447	0.038	0.00418	0.00611
0.10033	0.15784	0.03796	0.03757	0.0197	0.00744	0.00439	0.03586	0.00031	0.03046	0.00145	0.00145	0.0075	0.01271	0.00366	0.02641	0.00411	0.00583
0.09172	0.1502	0.05536	0.02163	0.00862	0.01303	0.00968	0.05089	0.00586	0.01589	0.00574	0.00574	0.01297	0.06044	0.009	0.04581	0.00796	0.01024
0.08399	0.14339	0.04975	0.0271	0.01156	0.0128	0.00902	0.04701	0.00466	0.02064	0.00548	0.00548	0.01279	0.05942	0.00802	0.04248	0.00774	0.01009
0.08625	0.1457	0.04925	0.0295	0.01538	0.0156	0.01213	0.04778	0.00788	0.02258	0.00885	0.00885	0.01571	0.0186	0.01115	0.04302	0.01087	0.01312
0.06885	0.1271	0.05716	0.03957	0.02383	0.03136	0.02434	0.05859	0.01861	0.02954	0.02142	0.02141	0.03187	0.03051	0.02165	0.047	0.02275	0.02706
0.07938	0.12982	0.0436	0.06367	0.04416	0.05189	0.02875	0.04336	0.02528	0.04533	0.03821	0.03818	0.05196	0.04176	0.01991	0.03106	0.0377	0.04582
0.11042	0.15685	0.02394	0.06307	0.05093	0.05594	0.01533	0.02504	0.02057	0.04934	0.04237	0.04226	0.04349	0.02792	0.00902	0.0156	0.03806	0.04276
0.0937	0.1408	0.03623	0.05295	0.04069	0.05506	0.0207	0.03677	0.0205	0.04207	0.04103	0.04097	0.04748	0.03108	0.02072	0.01477	0.03728	0.04518
0.07249	0.12993	0.06193	0.02536	0.01052	0.0192	0.01348	0.05917	0.00875	0.01708	0.00894	0.00894	0.01944	0.01908	0.01225	0.04793	0.0106	0.01455
0.11608	0.16972	0.03302	0.03881	0.02369	0.00589	0.00249	0.03279	0.00191	0.02889	0.00054	0.00054	0.03744	0.18641	0.00184	0.00751	0.00268	0.00451
0.10856	0.16142	0.0328	0.039	0.02376	0.00898	0.003	0.03284	0.00368	0.02775	0.00081	0.00081	0.03687	0.01595	0.003	0.00751	0.0037	0.00684
0.05575	0.11238	0.06519	0.02382	0.00576	0.01657	0.00955	0.05808	0.00475	0.016	0.00516	0.00515	0.01671	0.01445	0.008	0.04643	0.00715	0.01142
0.08776	0.14462	0.04846	0.03445	0.01363	0.01362	0.008	0.04786	0.00242	0.02508	0.004	0.00399	0.05164	0.0174	0.00666	0.03055	0.00707	0.01054
0.11282	0.16437	0.02531	0.03793	0.02855	0.00852	0.00164	0.02494	0.00541	0.02874	0.00139	0.00139	0.03609	0.01607	0.00164	0.00686	0.00315	0.00645
0.10025	0.15433	0.03339	0.04594	0.026	0.01183	0.00492	0.03355	0.00188	0.03237	0.0022	0.00219	0.0473	0.01776	0.00492	0.01086	0.00583	0.08949
0.09354	0.14969	0.03866	0.0432	0.02213	0.01103	0.00548	0.03853	0.00092	0.03259	0.00233	0.00232	0.01119	0.01628	0.00402	0.02085	0.00562	0.07786
0.11955	0.16658	0.01732	0.02542	0.02547	0.01464	0.00179	0.01604	0.0081	0.02036	0.00184	0.00183	0.02985	0.01906	0.00179	0.02553	0.00579	0.01157
0.12138	0.17056	0.01783	0.02999	0.02898	0.00844	0.0014	0.01706	0.00689	0.02579	0.00188	0.00189	0.03077	0.01652	0.00139	0.02175	0.00278	0.00641
0.12103	0.1711	0.02497	0.02587	0.02305	0.00718	0.00143	0.02461	0.00604	0.02255	0.00256	0.00257	0.02638	0.01546	0.00143	0.01545	0.00221	0.00531
0.11426	0.16247	0.02688	0.02174	0.01884	0.01167	0.00321	0.02515	0.009	0.0175	0.00281	0.00281	0.02405	0.01724	0.00321	0.02207	0.00357	0.00865
0.10791	0.15495	0.0292	0.02222	0.01961	0.02108	0.00481	0.02556	0.00707	0.01523	0.00625	0.00623	0.03194	0.01881	0.00481	0.02371	0.00875	0.01656
0.063	0.1191	0.07392	0.01015	0.01614	0.01404	0.00954	0.06296	0.00998	0.00702	0.00656	0.00656	0.01317	0.04087	0.00895	0.0558	0.00841	0.00862
0.09473	0.15358	0.04099	0.01731	0.00795	0.00873	0.00653	0.03502	0.0038	0.01345	0.00379	0.00379	0.04041	0.06373	0.00608	0.03693	0.00545	0.00667
0.10631	0.16377	0.02991	0.01079	0.00761	0.00836	0.00695	0.026	0.00537	0.00821	0.00508	0.00508	0.02906	0.14566	0.00676	0.02673	0.00603	0.00666
0.08309	0.14295	0.05097	0.02343	0.01333	0.01601	0.01307	0.04755	0.00959	0.0178	0.00997	0.00996	0.04846	0.05744	0.01225	0.04838	0.01153	0.01342
0.07963	0.13697	0.04562	0.04285	0.02351	0.02318	0.01599	0.04694	0.00972	0.03139	0.01343	0.01343	0.02359	0.02528	0.01344	0.03229	0.01568	0.01976
0.08966	0.1489	0.04832	0.01773	0.0099	0.01293	0.01045	0.04242	0.00761	0.01326	0.00748	0.00748	0.04148	0.06021	0.00991	0.04447	0.00896	0.01045
0.08223	0.14189	0.05207	0.02391	0.01087	0.01405	0.01047	0.04868	0.00647	0.01785	0.00695	0.00695	0.01398	0.04673	0.00953	0.04646	0.00891	0.01117
0.09297	0.14488	0.03044	0.04475	0.03087	0.02896	0.01118	0.02948	0.00417	0.02893	0.01526	0.01525	0.04836	0.0275	0.0112	0.01598	0.01724	0.02444
0.09436	0.14829	0.04254	0.03564	0.01788	0.01888	0.01057	0.04265	0.00328	0.02366	0.00725	0.00724	0.01923	0.02245	0.01058	0.01868	0.01048	0.01536
0.10145	0.15991	0.03536	0.02551	0.01249	0.00499	0.003	0.03028	0.00042	0.02153	0.00054	0.00054	0.00486	0.00912	0.00257	0.03074	0.00253	0.00362
0.05564	0.10921	0.0843	0.01432	0.02431	0.02179	0.0172	0.07321	0.018	0.01169	0.01302	0.01302	0.02142	0.03532	0.01651	0.07406	0.01301	0.0153
0.11628	0.17312	0.02595	0.00939	0.003	0.00372	0.00161	0.02119	0.00081	0.00821	0.00105	0.00105	0.00234	0.00538	0.00149	0.02172	0.00111	0.00156
0.11785	0.1742	0.0212	0.00761	0.00513	0.00552	0.00426	0.01863	0.00312	0.0059	0.00285	0.00285	0.00477	0.02767	0.00415	0.01895	0.00363	0.004
0.11051	0.16718	0.02124	0.011	0.00559	0.00286	0.00114	0.01717	0.00187	0.01009	0.00193	0.00193	0.00143	0.14797	0.00114	0.0179	0.00097	0.00101
0.0786	0.13749	0.06198	0.01084	0.01374	0.01574	0.01196	0.05189	0.00981	0.00738	0.00847	0.00847	0.01441	0.05218	0.01144	0.05409	0.00916	0.01086
0.05703	0.11064	0.06333	0.04225	0.02339	0.03512	0.02272	0.0581	0.01616	0.02641	0.02182	0.02181	0.03595	0.02823	0.01916	0.04967	0.02179	0.02836
0.09884	0.15449	0.04246	0.03643	0.01666	0.00561	0.00316	0.03996	0.00634	0.02868	0.00485	0.00485	0.04869	0.01112	0.00316	0.0224	0.00266	0.00376
0.09077	0.14932	0.04654	0.02968	0.01199	0.00943	0.0058	0.0434	0.00153	0.02323	0.00228	0.00227	0.00942	0.06408	0.00495	0.03638	0.00494	0.00713
0.12469	0.1702	0.01505	0.02156	0.02154	0.0177	0.00154	0.01384	0.00744	0.01679	0.00454	0.00453	0.02931	0.01929	0.00153	0.02969	0.00781	0.01427
0.12401	0.16963	0.01435	0.02345	0.0227	0.02175	0.00147	0.01332	0.00565	0.01673	0.00855	0.00853	0.03297	0.02026	0.00133	0.02755	0.0109	0.01784
0.06261	0.12091	0.06895	0.02078	0.01417	0.02063	0.01651	0.06319	0.01293	0.01409	0.01251	0.01251	0.02073	0.04462	0.01553	0.05497	0.01304	0.01569
0.09065	0.14945	0.04404	0.03359	0.01642	0.01229	0.00879	0.04263	0.00432	0.02638	0.00563	0.00562	0.01239	0.01632	0.00783	0.03567	0.00798	0.01012
0.09574	0.15364	0.03902	0.03808	0.01986	0.00932	0.00588	0.03764	0.00139	0.03052	0.0029	0.00289	0.0094	0.01426	0.00588	0.02831	0.00552	0.00748
0.09513	0.15381	0.04146	0.0313	0.01513	0.00898	0.00611	0.03835	0.00215	0.0252	0.00308	0.00308	0.009	0.15375	0.00539	0.03419	0.00544	0.00716
0.09745	0.15596	0.03229	0.01962	0.00949	0.00487	0.00297	0.02716	0.00057	0.01645	0.00072	0.00072	0.04119	0.14237	0.00258	0.02914	0.00242	0.00333
0.10586	0.16385	0.0241	0.0211	0.01297	0.00504	0.00405	0.02111	0.00216	0.01804	0.00242	0.00242	0.04068	0.14751	0.00381	0.02277	0.00356	0.00411
0.09226	0.15146	0.0465	0.02185	0.01051	0.01129	0.00875	0.04146	0.00545	0.01685	0.00567	0.00567	0.01118	0.0452	0.00815	0.04209	0.00751	0.00912
0.0881	0.14754	0.04184	0.02215	0.01068	0.00989	0.00742	0.03715	0.00418	0.01743	0.00463	0.00463	0.04617	0.06112	0.00676	0.03926	0.0064	0.00784
0.09909	0.15746	0.03806	0.01401	0.0062	0.00758	0.00546	0.03187	0.0031	0.01086	0.00287	0.00287	0.03601	0.0099	0.00512	0.03339	0.00444	0.00546
0.08241	0.14235	0.04904	0.02551	0.0141	0.01538	0.0123	0.0463	0.00857	0.01951	0.00923	0.00922	0.05106	0.0177	0.01139	0.04633	0.01092	0.01288
0.07052	0.12621	0.06262	0.02607	0.01199	0.02066	0.01489	0.05868	0.00999	0.01708	0.0105	0.01049	0.02108	0.01959	0.01369	0.04291	0.01177	0.01564
0.09359	0.15044	0.05045	0.03196	0.0133	0.01471	0.00997	0.0506	0.00457	0.02313	0.00586	0.00586	0.047	0.01879	0.00889	0.03264	0.00874	0.07339
0.09403	0.15006	0.04537	0.03711	0.01694	0.01505	0.00942	0.04604	0.00337	0.02664	0.00568	0.00568	0.04759	0.01951	0.00803	0.02556	0.00875	0.01222
0.12857	0.17368	0.01572	0.02665	0.0217	0.02773	0.00158	0.01341	0.004	0.01937	0.01587	0.01584	0.03808	0.01667	0.00158	0.02688	0.01531	0.0222
0.13196	0.17763	0.01868	0.03261	0.02448	0.02737	0.00367	0.01596	0.00421	0.02394	0.01826	0.01821	0.04146	0.01131	0.00366	0.01809	0.01541	0.02046
0.13977	0.18432	0.01414	0.03578	0.02631	0.03156	0.00163	0.01275	0.0006	0.02777	0.02249	0.02243	0.04272	0.01284	0.00164	0.01331	0.01955	0.02339
0.08668	0.13935	0.05318	0.0424	0.0311	0.04207	0.03068	0.05463	0.02353	0.03184	0.02962	0.02961	0.04288	0.0396	0.02681	0.03425	0.03087	0.0373
0.10319	0.16093	0.05541	0.01579	0.00957	0.01339	0.01105	0.04773	0.00838	0.01144	0.00747	0.00746	0.01321	0.06357	0.01068	0.04707	0.00923	0.01091
0.08741	0.14329	0.04456	0.04184	0.0227	0.02287	0.01523	0.04594	0.00851	0.0292	0.01249	0.01248	0.0233	0.0256	0.01524	0.02628	0.01504	0.01945
0.09537	0.15214	0.05524	0.02706	0.01096	0.01545	0.0112	0.05505	0.00626	0.01916	0.00673	0.00672	0.04175	0.01921	0.01033	0.03729	0.00946	0.01254
0.07803	0.1308	0.0553	0.02721	0.00768	0.01405	0.00753	0.0503	0.00606	0.018	0.00462	0.00462	0.01436	0.01498	0.00754	0.03192	0.006	0.00995
0.09805	0.15318	0.04328	0.0373	0.01752	0.01388	0.00814	0.04394	0.00196	0.02633	0.00437	0.00437	0.01411	0.01893	0.00679	0.02084	0.00768	0.07764
0.10124	0.15631	0.0418	0.03757	0.0179	0.01023	0.00524	0.0418	0.00106	0.02716	0.00152	0.00152	0.01038	0.01602	0.00416	0.01927	0.00495	0.00791
0.11145	0.16614	0.03938	0.03634	0.01894	0.00831	0.00481	0.03916	0.00025	0.02659	0.00138	0.00138	0.03805	0.0147	0.00412	0.01595	0.00447	0.00659
0.11856	0.16425	0.02442	0.03789	0.02856	0.03829	0.00627	0.02311	0.00436	0.02898	0.02632	0.02627	0.04953	0.01846	0.00395	0.00675	0.02316	0.02987
0.10593	0.16046	0.03764	0.03972	0.0208	0.00635	0.00228	0.03687	0.00397	0.02976	0.00213	0.00214	0.04342	0.01299	0.00228	0.01591	0.00229	0.00457
0.11634	0.16816	0.03028	0.03229	0.02354	0.00512	0.00152	0.02991	0.006	0.02642	0.0036	0.00361	0.03184	0.19232	0.00152	0.00685	0.00143	0.00358
0.11791	0.1747	0.03382	0.02551	0.01158	0.00259	0.00121	0.02802	0.00178	0.02216	0.00171	0.00172	0.00247	0.05774	0.00121	0.0259	0.00092	0.00167
0.11053	0.16655	0.04082	0.03424	0.01646	0.00656	0.00384	0.03825	0.00032	0.02672	0.00061	0.00061	0.00662	0.01244	0.00332	0.02318	0.00339	0.00507
0.12256	0.16791	0.01938	0.01965	0.0181	0.02198	0.00254	0.01736	0.00571	0.01356	0.00823	0.00822	0.03045	0.01915	0.00213	0.02656	0.01034	0.01777
0.05639	0.10279	0.06474	0.05432	0.04108	0.05985	0.03813	0.06638	0.03292	0.04185	0.04478	0.04475	0.05919	0.04271	0.03257	0.0476	0.04205	0.05062
0.06154	0.11206	0.06173	0.04751	0.03365	0.05028	0.03147	0.061	0.0252	0.03444	0.0352	0.03518	0.05058	0.03705	0.02604	0.04591	0.03364	0.04231
0.06355	0.12104	0.07339	0.02498	0.02021	0.02911	0.02339	0.07087	0.01896	0.01812	0.01863	0.01862	0.02942	0.04755	0.02191	0.05934	0.0193	0.02335
0.11485	0.1719	0.02581	0.01176	0.00463	0.00319	0.00138	0.02105	0.00113	0.01044	0.00132	0.00132	0.00209	0.15954	0.00127	0.02174	0.00097	0.00137
0.1193	0.17627	0.02582	0.01585	0.00708	0.0022	0.00106	0.02101	0.0019	0.01443	0.00201	0.00201	0.00152	0.07637	0.00106	0.02167	0.00081	0.00099
0.11747	0.17423	0.03324	0.02779	0.01343	0.00235	0.00103	0.02769	0.0021	0.02414	0.00193	0.00193	0.00225	0.06034	0.00103	0.0247	0.00079	0.0015
0.10521	0.15674	0.03526	0.02791	0.01791	0.01643	0.00718	0.03482	0.00135	0.01945	0.00419	0.00419	0.02953	0.02124	0.00523	0.01046	0.00799	0.01314
0.12141	0.16705	0.02073	0.02939	0.0233	0.03239	0.00418	0.01813	0.00077	0.02183	0.01959	0.01956	0.04182	0.01961	0.00223	0.01621	0.01865	0.02623
0.12922	0.17431	0.0168	0.03918	0.03007	0.03593	0.00302	0.01569	0.00241	0.03018	0.03918	0.02533	0.04892	0.0161	0.00216	0.02496	0.02222	0.02734
0.13776	0.18174	0.01212	0.04381	0.03224	0.0322	0.0041	0.01257	0.00581	0.04381	0.04381	0.02312	0.04573	0.01437	0.00411	0.00046	0.02042	0.02254
0.09861	0.15263	0.04418	0.03406	0.01496	0.00717	0.00447	0.04196	0.00805	0.02548	0.00633	0.00633	0.03806	0.01231	0.00447	0.0202	0.00388	0.00501
0.10732	0.16195	0.03747	0.0393	0.02065	0.00504	0.00193	0.03615	0.00468	0.03016	0.00306	0.00307	0.04357	0.01174	0.00193	0.01496	0.00166	0.00348
0.11021	0.16658	0.03346	0.03912	0.02184	0.00377	0.00148	0.03044	0.00218	0.03257	0.00132	0.00132	0.00377	0.00966	0.00148	0.02015	0.0015	0.00271
0.09642	0.15276	0.046	0.03512	0.01511	0.01184	0.00709	0.04581	0.00165	0.02586	0.00319	0.00319	0.04781	0.01676	0.00602	0.02694	0.00636	0.00932
0.1121	0.16908	0.04017	0.02769	0.01194	0.005	0.00299	0.03467	0.00046	0.02286	0.00038	0.00038	0.00497	0.07394	0.00299	0.02921	0.00245	0.0037
0.10552	0.16356	0.03537	0.02765	0.01368	0.00438	0.00244	0.03029	0.00084	0.02355	0.0005	0.0005	0.00429	0.07066	0.00244	0.02925	0.00207	0.00314
0.10796	0.16523	0.04931	0.02163	0.00781	0.00924	0.00694	0.04305	0.00371	0.01661	0.00338	0.00337	0.00921	0.01348	0.00655	0.03844	0.00569	0.00733
0.10725	0.16422	0.0437	0.03065	0.01338	0.00761	0.00498	0.04007	0.00115	0.02418	0.00163	0.00163	0.00765	0.01284	0.00448	0.02991	0.00427	0.00596
0.12103	0.1711	0.02497	0.02587	0.02305	0.00718	0.00143	0.02461	0.00604	0.02255	0.00256	0.00257	0.02638	0.01546	0.00143	0.01545	0.00221	0.00531
0.11925	0.16721	0.02016	0.02422	0.02261	0.02428	0.00771	0.01985	0.00063	0.01726	0.01128	0.01127	0.03366	0.02579	0.00772	0.01748	0.01406	0.02057
0.08558	0.14107	0.06413	0.01584	0.00817	0.00822	0.00516	0.05619	0.00673	0.01298	0.00605	0.00605	0.03624	0.05614	0.0051	0.04332	0.01267	0.00523
0.1045	0.16183	0.05077	0.0171	0.00406	0.00743	0.00487	0.04241	0.00209	0.01323	0.00157	0.00157	0.00714	0.06522	0.0045	0.04026	0.00357	0.00518
0.09024	0.14569	0.04469	0.04006	0.02154	0.02224	0.01473	0.04608	0.00793	0.02752	0.01174	0.01173	0.02266	0.02527	0.01256	0.02504	0.01441	0.01884
0.10077	0.15441	0.0345	0.04255	0.02431	0.01484	0.00712	0.03498	0.00055	0.02922	0.00448	0.00447	0.01512	0.02025	0.00514	0.01171	0.008	0.01204
0.10835	0.15866	0.02263	0.03745	0.02994	0.0131	0.00227	0.02142	0.00701	0.0272	0.00131	0.00131	0.01332	0.01872	0.00228	0.01539	0.00517	0.01018
0.12407	0.16926	0.02103	0.02344	0.02261	0.01928	0.00644	0.0164	0.01135	0.01621	0.00669	0.00666	0.03308	0.0134	0.00643	0.01711	0.00781	0.015
0.13041	0.17577	0.01871	0.02787	0.02171	0.0259	0.00352	0.01505	0.00588	0.02013	0.01549	0.01546	0.03819	0.01268	0.00351	0.02276	0.01383	0.01998
0.13255	0.17804	0.01939	0.02604	0.02033	0.02271	0.00539	0.01546	0.00817	0.01847	0.01296	0.01292	0.03573	0.0107	0.00538	0.02577	0.0114	0.01728
0.10372	0.15436	0.0313	0.03121	0.02518	0.03155	0.0148	0.03098	0.00733	0.02242	0.01791	0.0179	0.03188	0.03032	0.01066	0.0107	0.01989	0.02714
0.11546	0.16458	0.02149	0.02677	0.02436	0.02116	0.00682	0.02121	0.00058	0.02007	0.00861	0.0086	0.03373	0.02462	0.00362	0.01542	0.01184	0.01776
0.06948	0.12026	0.05763	0.0435	0.03016	0.04769	0.02798	0.05743	0.02153	0.03199	0.03218	0.03216	0.04774	0.03498	0.02299	0.03981	0.03128	0.04031
0.10201	0.15056	0.03053	0.027	0.0217	0.01789	0.00536	0.02822	0.00849	0.01849	0.0042	0.00419	0.01799	0.01844	0.00536	0.02173	0.00679	0.01366
0.09103	0.13914	0.03411	0.04916	0.0374	0.04714	0.01597	0.03485	0.01348	0.03683	0.03372	0.03366	0.04085	0.02744	0.01599	0.00735	0.03029	0.03805
0.0806	0.13581	0.04313	0.04712	0.02675	0.02823	0.01768	0.0436	0.01065	0.03277	0.0166	0.01659	0.02878	0.02874	0.01392	0.02652	0.01868	0.02414
0.08535	0.14395	0.04526	0.03802	0.02017	0.0174	0.01276	0.046	0.00756	0.0291	0.00968	0.00967	0.01763	0.02085	0.01129	0.03535	0.01198	0.06155
0.07985	0.13946	0.05306	0.02829	0.0138	0.0171	0.0129	0.05192	0.00835	0.02105	0.00934	0.00933	0.0172	0.01923	0.01169	0.04574	0.01133	0.01403
0.06554	0.12411	0.06993	0.02271	0.01707	0.02475	0.01963	0.06717	0.01553	0.01571	0.01513	0.01512	0.02484	0.04687	0.01832	0.05814	0.01886	0.01949
0.07937	0.13801	0.06367	0.01788	0.0108	0.01665	0.01257	0.05902	0.00897	0.01219	0.00823	0.00823	0.01644	0.05213	0.01174	0.0535	0.00986	0.01257
0.10549	0.16321	0.03456	0.01628	0.00592	0.00376	0.00249	0.0272	0.00389	0.0147	0.00401	0.00401	0.00299	0.06871	0.00249	0.0283	0.00243	0.00221
0.09217	0.14508	0.04036	0.04059	0.02619	0.03204	0.01904	0.04066	0.01147	0.02624	0.01917	0.01916	0.03261	0.03172	0.01514	0.01952	0.02119	0.02769
0.07899	0.13557	0.05865	0.0258	0.00866	0.01414	0.00999	0.05504	0.00669	0.01825	0.00628	0.00628	0.01431	0.01539	0.00922	0.03941	0.00772	0.01031
0.08865	0.14514	0.04607	0.03668	0.01544	0.01291	0.00706	0.04545	0.0019	0.02678	0.00326	0.00325	0.05224	0.01703	0.00567	0.02753	0.00642	0.00992
0.09779	0.15075	0.0281	0.04783	0.03123	0.02224	0.00989	0.02835	0.0027	0.0321	0.01055	0.01054	0.04892	0.02554	0.0099	0.00878	0.01349	0.01885
0.12677	0.1755	0.01887	0.02515	0.02489	0.00551	0.0024	0.01808	0.00757	0.02346	0.00394	0.00394	0.02613	0.01446	0.0024	0.02411	0.00124	0.00394
0.12789	0.17728	0.02119	0.0254	0.02456	0.00283	0.00355	0.02035	0.00801	0.02453	0.00561	0.00562	0.00287	0.01184	0.00355	0.02115	0.00169	0.00181
0.10991	0.16642	0.03875	0.03464	0.01724	0.00545	0.00297	0.03541	0.00087	0.02801	0.00033	0.00033	0.00547	0.01116	0.00249	0.024	0.00265	0.00411
0.10317	0.16011	0.04137	0.03603	0.01762	0.00866	0.00547	0.03966	0.00111	0.02825	0.00221	0.00221	0.00875	0.01405	0.00477	0.02654	0.00496	0.0661
0.09629	0.15186	0.03519	0.04791	0.02697	0.01517	0.00913	0.03636	0.00313	0.03543	0.00659	0.00659	0.01544	0.02031	0.00914	0.01676	0.00954	0.01272
0.1068	0.159	0.02922	0.03885	0.0262	0.01425	0.0055	0.02935	0.00179	0.02707	0.00348	0.00347	0.01453	0.02022	0.0055	0.0069	0.00724	0.01151
0.11022	0.16293	0.03573	0.03369	0.02007	0.00913	0.00355	0.03597	0.00302	0.02424	0.00075	0.00075	0.0319	0.01608	0.00356	0.00828	0.00383	0.00696
0.08627	0.14267	0.0473	0.03535	0.0138	0.01091	0.0059	0.04533	0.00395	0.02594	0.00309	0.00309	0.05192	0.01473	0.00515	0.02854	0.0048	0.00783
0.08698	0.14132	0.03956	0.04277	0.02156	0.01829	0.00839	0.03837	0.00209	0.02877	0.00606	0.00605	0.01862	0.021	0.0084	0.01952	0.00927	0.0145
0.09914	0.15156	0.0327	0.03792	0.02384	0.01897	0.0079	0.03215	0.00093	0.02555	0.00661	0.0066	0.01932	0.02269	0.00512	0.01334	0.01001	0.01547
0.11069	0.15708	0.0287	0.02603	0.02281	0.02574	0.00479	0.02442	0.00627	0.01742	0.0117	0.01168	0.03776	0.01692	0.00479	0.02109	0.01208	0.02038
0.11915	0.16539	0.03297	0.02103	0.01843	0.02032	0.00723	0.02656	0.01072	0.0136	0.00816	0.00813	0.03185	0.01272	0.00722	0.02721	0.00798	0.01537
0.12171	0.16672	0.02605	0.01853	0.01742	0.01857	0.0055	0.02072	0.0108	0.01242	0.00518	0.00516	0.02877	0.01343	0.0055	0.03048	0.00675	0.01425
0.10305	0.15416	0.03173	0.03342	0.02234	0.01262	0.00398	0.03009	0.00709	0.02311	0.00213	0.00213	0.01283	0.01772	0.00333	0.01405	0.00453	0.10053
0.09708	0.14541	0.03456	0.03354	0.02603	0.03385	0.00929	0.03091	0.00392	0.02311	0.01885	0.03354	0.04633	0.02323	0.00621	0.01556	0.01875	0.02773
0.11115	0.15828	0.02566	0.02201	0.01968	0.01854	0.00389	0.02376	0.00747	0.01567	0.00414	0.00413	0.02955	0.01904	0.0039	0.02254	0.00735	0.01451
0.11557	0.16303	0.02439	0.0216	0.01978	0.01345	0.00298	0.02267	0.0088	0.01687	0.00166	0.00166	0.0136	0.01799	0.00298	0.02288	0.00445	0.01023
0.05288	0.10663	0.08283	0.02852	0.02523	0.03326	0.02762	0.07576	0.02393	0.02137	0.0232	0.02319	0.0338	0.05028	0.0264	0.07827	0.02296	0.02668
0.0471	0.10228	0.07874	0.03294	0.02346	0.0346	0.02791	0.07269	0.02331	0.02317	0.02402	0.02401	0.03528	0.02889	0.02607	0.06345	0.02365	0.0279
0.06321	0.12089	0.07144	0.01949	0.01713	0.02061	0.01693	0.06366	0.01442	0.0138	0.01352	0.01352	0.02056	0.04334	0.01618	0.05672	0.01374	0.01579
0.09643	0.15493	0.04297	0.02343	0.00871	0.00564	0.00317	0.03656	0.00188	0.01924	0.00167	0.00167	0.04797	0.00948	0.00317	0.03567	0.0024	0.00372
0.10468	0.1625	0.03268	0.02529	0.01282	0.00283	0.00338	0.02607	0.00578	0.02318	0.00539	0.00539	0.00252	0.05003	0.00338	0.02638	0.00302	0.00252
0.1079	0.16586	0.03328	0.02133	0.00973	0.00392	0.00221	0.0277	0.00073	0.01831	0.00063	0.00063	0.00366	0.04655	0.00192	0.02853	0.00176	0.00263
0.06548	0.12276	0.07125	0.01917	0.01694	0.02001	0.01639	0.06351	0.01423	0.01373	0.01327	0.01327	0.01997	0.04467	0.01574	0.05543	0.01606	0.01533
0.09266	0.15021	0.05572	0.01757	0.00513	0.00822	0.00604	0.04696	0.00481	0.01386	0.00501	0.00501	0.04219	0.04734	0.00573	0.04263	0.00462	0.0057
0.09138	0.14399	0.04558	0.0319	0.01406	0.01209	0.00712	0.04259	0.00903	0.02142	0.00659	0.0066	0.03226	0.01524	0.00712	0.02288	0.00603	0.00873
0.09888	0.13087	0.02353	0.07469	0.06292	0.06209	0.01039	0.02289	0.02216	0.05173	0.04021	0.07469	0.07746	0.02331	0.01041	0.01454	0.03915	0.04017
0.08467	0.14135	0.05143	0.03061	0.01045	0.00976	0.00661	0.0476	0.00725	0.02308	0.00637	0.00637	0.05015	0.0124	0.00639	0.03303	0.00558	0.00708
0.09396	0.14866	0.04277	0.03782	0.01746	0.01415	0.0072	0.04254	0.00151	0.02615	0.0035	0.00349	0.01439	0.01869	0.0056	0.02176	0.00698	0.01105
0.09102	0.14938	0.04941	0.02883	0.01113	0.01119	0.0074	0.04685	0.00285	0.02204	0.00362	0.00362	0.01122	0.06378	0.00652	0.038	0.00628	0.00868
0.08358	0.14156	0.04871	0.03357	0.01329	0.01316	0.0079	0.04756	0.00263	0.02508	0.00408	0.00408	0.01328	0.01653	0.00656	0.0343	0.00691	0.01011
0.09642	0.15365	0.04262	0.0354	0.01622	0.0075	0.00372	0.04043	0.00189	0.02794	0.00108	0.00108	0.05584	0.01272	0.00372	0.02786	0.00333	0.0055
0.08843	0.14334	0.04193	0.04127	0.02097	0.02019	0.01142	0.042	0.0042	0.02799	0.00877	0.00876	0.02057	0.0231	0.00894	0.02136	0.01171	0.08196
0.07296	0.1262	0.05466	0.04211	0.0249	0.03795	0.02467	0.05302	0.01747	0.02787	0.024	0.02399	0.03859	0.03276	0.02046	0.03803	0.02485	0.03208
0.0846	0.13631	0.03912	0.04126	0.02584	0.03172	0.01321	0.03744	0.00604	0.02505	0.01671	0.0167	0.03186	0.02651	0.00888	0.02312	0.01798	0.02618
0.08408	0.14225	0.05002	0.03475	0.0168	0.01813	0.01286	0.0506	0.00733	0.02554	0.00927	0.00926	0.05818	0.02105	0.01136	0.03688	0.0117	0.01503
0.09687	0.15341	0.04293	0.03964	0.01994	0.01488	0.01015	0.04388	0.00465	0.02941	0.00679	0.00679	0.01511	0.01967	0.00893	0.02564	0.00957	0.01245
0.06342	0.11911	0.0837	0.01975	0.02736	0.02686	0.02325	0.07507	0.02182	0.01652	0.01898	0.01897	0.02663	0.03863	0.02261	0.0688	0.01831	0.02075
0.09279	0.14038	0.03471	0.07233	0.05864	0.06615	0.02543	0.0362	0.03151	0.05798	0.05175	0.05163	0.053	0.03823	0.02546	0.02809	0.04781	0.05289
0.09202	0.14164	0.03185	0.04365	0.0338	0.03949	0.01307	0.03123	0.00862	0.03091	0.02482	0.02479	0.03844	0.02856	0.00707	0.01369	0.02447	0.0333
0.10568	0.15474	0.02329	0.03245	0.02763	0.02403	0.00486	0.02201	0.00282	0.02252	0.01005	0.01004	0.02406	0.02322	0.00232	0.01647	0.01249	0.01979
0.09537	0.15146	0.04118	0.04027	0.01957	0.01115	0.0059	0.04108	0.0008	0.03002	0.00244	0.00244	0.05336	0.01638	0.00462	0.02235	0.00573	0.07677
0.09554	0.15389	0.04369	0.0277	0.01125	0.00624	0.00338	0.03864	0.00181	0.02253	0.00138	0.00138	0.00612	0.05491	0.00286	0.03453	0.00269	0.00433
0.1053	0.15483	0.02772	0.02802	0.02285	0.02386	0.0073	0.02647	0.00137	0.01925	0.00977	0.00976	0.03601	0.02401	0.00395	0.01632	0.01247	0.01964
0.1055	0.15356	0.0313	0.04797	0.03969	0.051	0.02012	0.03101	0.0181	0.03794	0.03689	0.03686	0.06175	0.03584	0.01366	0.00872	0.03557	0.04404
0.1159	0.17282	0.04006	0.00726	0.00633	0.00805	0.00588	0.03296	0.00496	0.0051	0.0031	0.0031	0.00709	0.03471	0.00571	0.03337	0.0046	0.00555
0.08781	0.14399	0.04554	0.04029	0.02107	0.02124	0.01422	0.04685	0.00769	0.02834	0.01114	0.01113	0.02162	0.02427	0.01215	0.02745	0.01376	0.01792
0.09393	0.15199	0.04963	0.02252	0.00625	0.0067	0.00436	0.04275	0.00339	0.01803	0.00331	0.00331	0.0472	0.0625	0.00436	0.0385	0.0033	0.00442
0.08583	0.14397	0.06011	0.01667	0.00666	0.01181	0.00836	0.05328	0.0055	0.0119	0.0048	0.0048	0.01151	0.05552	0.00782	0.04835	0.00613	0.00827
0.09669	0.1552	0.03908	0.02439	0.01043	0.00426	0.0025	0.03271	0.0032	0.02074	0.0028	0.00281	0.00396	0.06537	0.0025	0.03271	0.00195	0.00263
0.08364	0.1378	0.0416	0.04418	0.02469	0.02721	0.01512	0.04093	0.0076	0.02907	0.0144	0.01439	0.0277	0.02727	0.01514	0.02268	0.01664	0.0228
0.08747	0.14296	0.04136	0.04245	0.0207	0.0169	0.00896	0.04116	0.00215	0.02992	0.00603	0.00602	0.01719	0.02047	0.00897	0.02341	0.00919	0.07752
0.10305	0.15416	0.03173	0.03342	0.02234	0.01262	0.00398	0.03009	0.00709	0.02311	0.00213	0.00213	0.01283	0.01772	0.00333	0.01405	0.00453	0.10053
0.11581	0.16442	0.01941	0.03065	0.02847	0.01074	0.00272	0.01804	0.00925	0.02477	0.00189	0.0019	0.03186	0.01725	0.00272	0.02203	0.00341	0.11668
0.12194	0.16833	0.01564	0.02528	0.02592	0.01349	0.00285	0.01428	0.0093	0.0206	0.00101	0.00101	0.0293	0.01814	0.00284	0.02904	0.00491	0.01055
0.11955	0.16658	0.01732	0.02542	0.02547	0.01464	0.00179	0.01604	0.0081	0.02036	0.00184	0.00183	0.02985	0.01906	0.00179	0.02553	0.00579	0.01157
0.12411	0.16967	0.01386	0.02519	0.0264	0.01465	0.00369	0.01208	0.00972	0.02042	0.00186	0.00185	0.03044	0.01787	0.00368	0.03148	0.0056	0.01157
0.08843	0.14534	0.05009	0.03068	0.01042	0.00887	0.00556	0.04695	0.00495	0.02321	0.00413	0.00413	0.05031	0.01258	0.00503	0.03226	0.00436	0.00616
0.09792	0.15562	0.04543	0.02963	0.01182	0.00693	0.00377	0.04136	0.00154	0.02364	0.00118	0.00118	0.0069	0.06782	0.00317	0.03288	0.00308	0.00497
0.09606	0.15356	0.04955	0.02914	0.01068	0.01021	0.00648	0.04708	0.00195	0.02214	0.00254	0.00253	0.04959	0.01465	0.0057	0.03525	0.00541	0.00783
0.09573	0.15025	0.04554	0.03384	0.01443	0.01432	0.00783	0.04551	0.00183	0.0231	0.00366	0.00365	0.01455	0.01885	0.00644	0.02157	0.00715	0.07829
0.10005	0.14992	0.03141	0.02905	0.02335	0.02832	0.00995	0.02997	0.0025	0.01993	0.01368	0.01367	0.03974	0.0255	0.00996	0.01758	0.01559	0.02348
0.12308	0.16898	0.02444	0.02941	0.02203	0.02844	0.00369	0.02086	0.00416	0.02121	0.01736	0.01732	0.04038	0.01353	0.00368	0.01821	0.01513	0.02187
0.1075	0.15813	0.03032	0.02706	0.02039	0.01798	0.0067	0.02962	0.00179	0.01963	0.00522	0.00522	0.03095	0.02222	0.00429	0.01093	0.0089	0.01456
0.1167	0.16288	0.02121	0.02785	0.0235	0.02798	0.00297	0.01813	0.00371	0.01956	0.01452	0.01449	0.03959	0.01932	0.00298	0.01985	0.01481	0.02272
0.12125	0.16684	0.02113	0.02574	0.02053	0.02866	0.00317	0.0182	0.00295	0.01849	0.01561	0.01558	0.03797	0.01841	0.00318	0.0201	0.0154	0.02313
0.11183	0.15829	0.02604	0.02572	0.02269	0.02591	0.00405	0.02218	0.00517	0.01745	0.01172	0.0117	0.03729	0.01864	0.00405	0.02072	0.01256	0.02078
0.06806	0.10918	0.05144	0.07494	0.05962	0.07167	0.03946	0.05266	0.03908	0.05691	0.05683	0.05676	0.06711	0.05062	0.02907	0.0375	0.05292	0.06099
0.05507	0.10419	0.06278	0.05328	0.0382	0.05215	0.0332	0.0632	0.02755	0.03829	0.0379	0.03788	0.05254	0.03885	0.02771	0.04946	0.03593	0.04396
0.10413	0.15658	0.041	0.02832	0.01453	0.01318	0.00624	0.04083	0.00184	0.01918	0.00211	0.0021	0.02853	0.0187	0.00625	0.01324	0.0059	0.0913
0.11217	0.16566	0.03117	0.04299	0.02609	0.0029	0.00262	0.02972	0.00679	0.03342	0.00499	0.005	0.04255	0.18167	0.00261	0.00835	0.00176	0.00189
0.06473	0.1169	0.05301	0.04924	0.02833	0.03979	0.02148	0.05089	0.01502	0.03087	0.0248	0.02477	0.04009	0.0298	0.02149	0.03981	0.02449	0.03293
0.12072	0.17623	0.02612	0.00322	0.00692	0.00841	0.00378	0.02157	0.00661	0.00322	0.00322	0.00322	0.01419	0.08342	0.00373	0.02152	0.00824	0.00319
0.10339	0.15403	0.02749	0.0331	0.02799	0.02867	0.01126	0.02696	0.00404	0.02346	0.01518	0.01517	0.02896	0.02817	0.0069	0.01101	0.01739	0.02444
0.11729	0.17054	0.03105	0.039	0.02521	0.00555	0.00208	0.03094	0.00228	0.02933	0.00081	0.00081	0.03713	0.18762	0.00208	0.00505	0.00242	0.00423
0.13714	0.19194	0.02286	0.00581	0.00585	0.00568	0.00444	0.01724	0.02199	0.00581	0.00581	0.00581	0.00406	0.028	0.00444	0.01723	0.00434	0.00402
0.09568	0.13919	0.02611	0.07246	0.06016	0.063	0.01878	0.02525	0.02588	0.05355	0.04658	0.04647	0.0531	0.04037	0.0188	0.01816	0.04415	0.04948
0.12367	0.16883	0.01898	0.02087	0.02121	0.01065	0.00572	0.01662	0.01287	0.01808	0.00353	0.00354	0.02426	0.01541	0.00571	0.03337	0.00271	0.00784
0.06969	0.12497	0.05522	0.03691	0.01687	0.0278	0.01755	0.05281	0.01052	0.0243	0.01459	0.01458	0.05169	0.02535	0.01466	0.03796	0.01625	0.0224
[truncated: 240 more rows]
